# Supplementary material for: Improving the usefulness of US mortality data: new methods for reclassification of underlying cause of death
Source: PubMed Central journal article supplement (PMC4848792; doi:10.1186/s12963-016-0082-4), 2016-04-28

ICD 9  
Female, Age 0

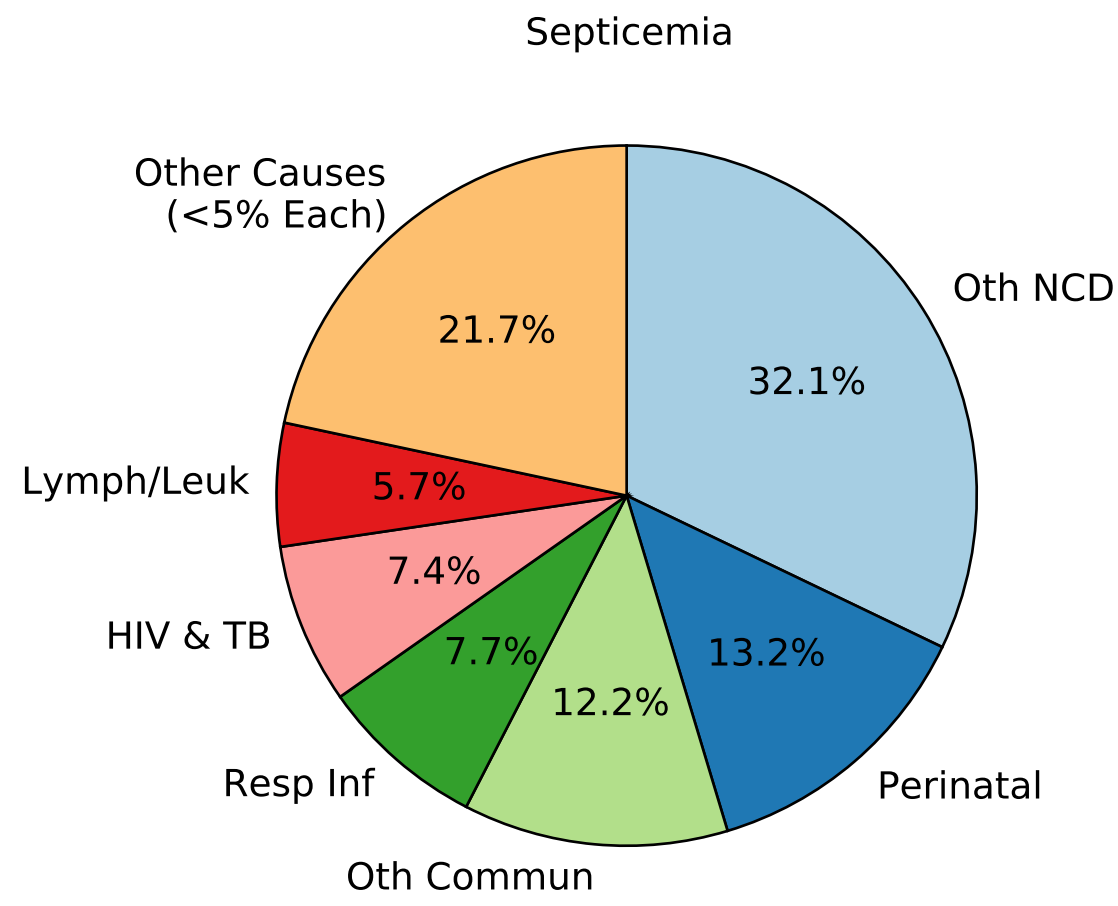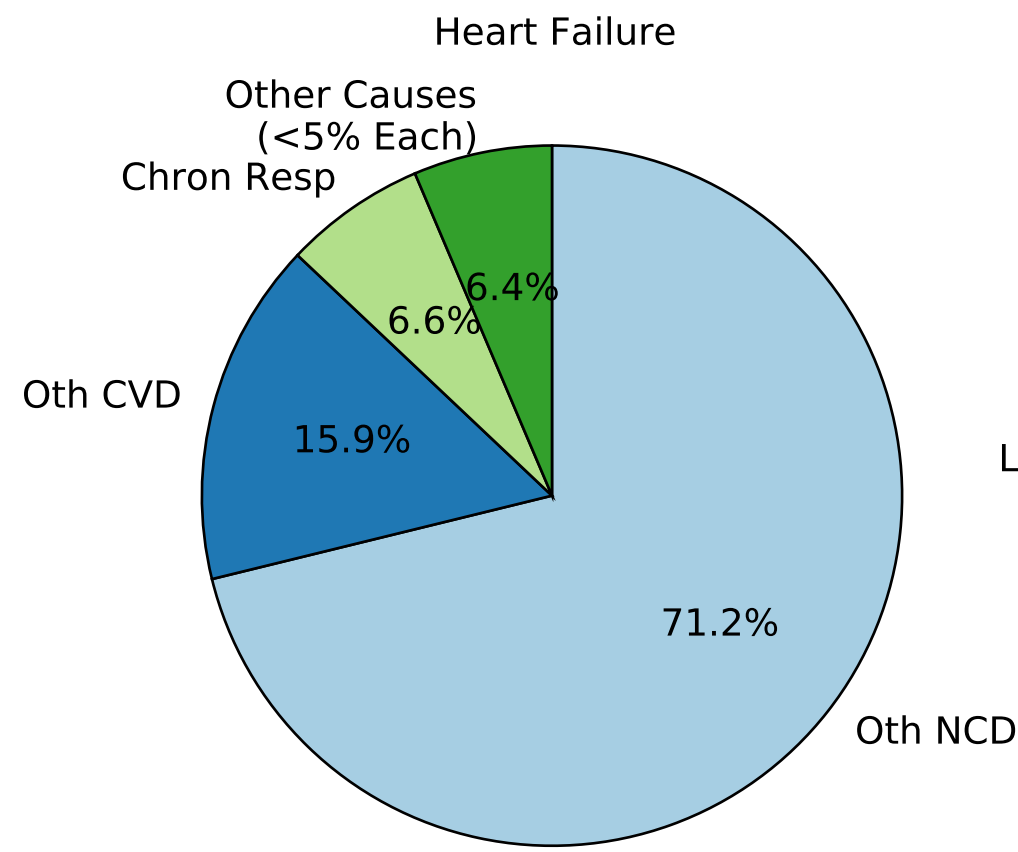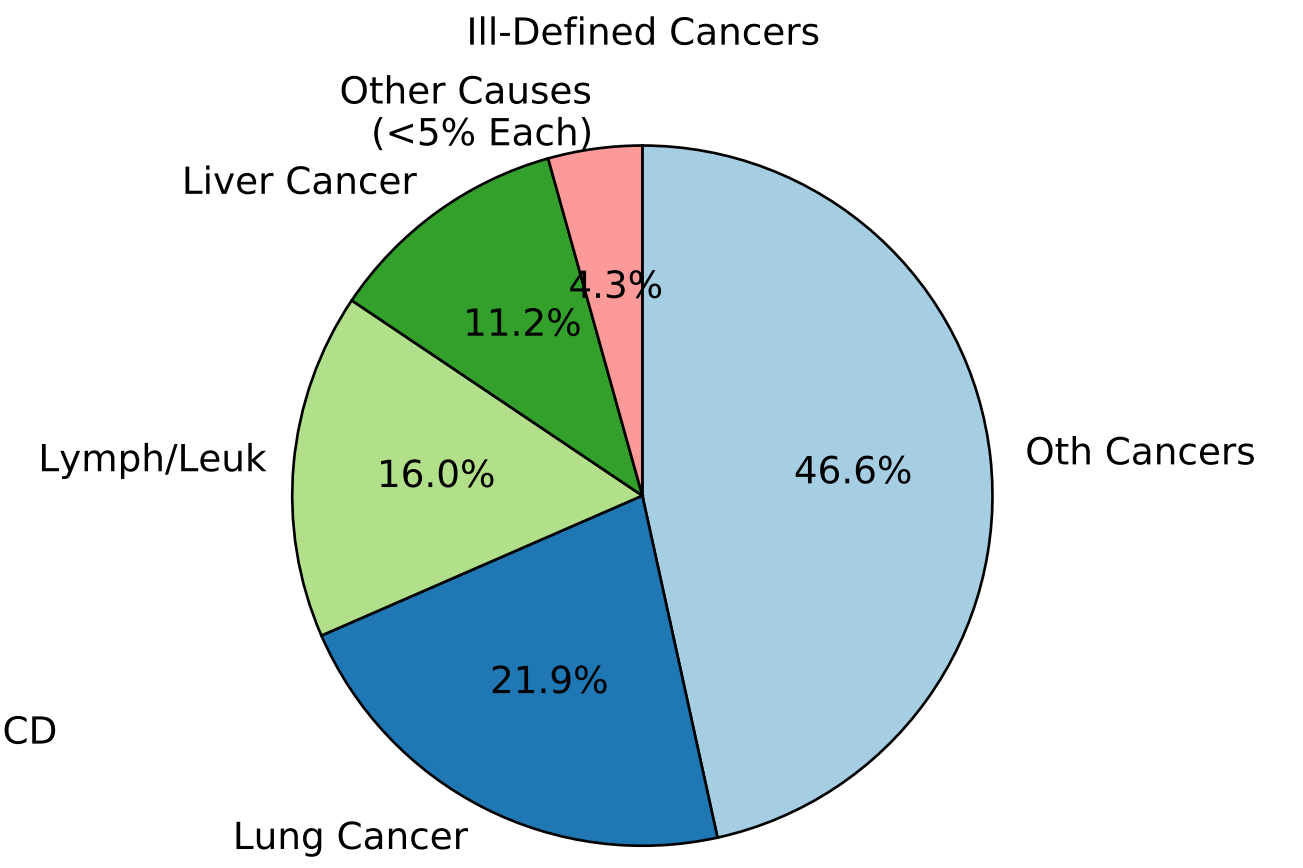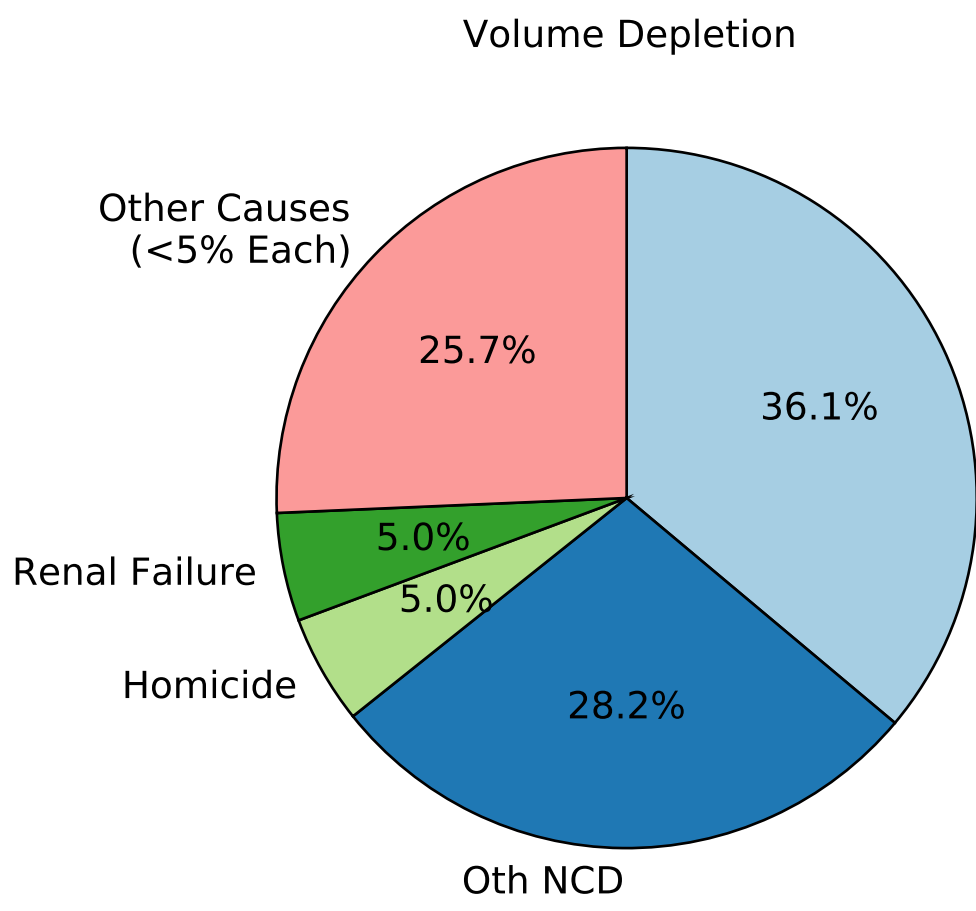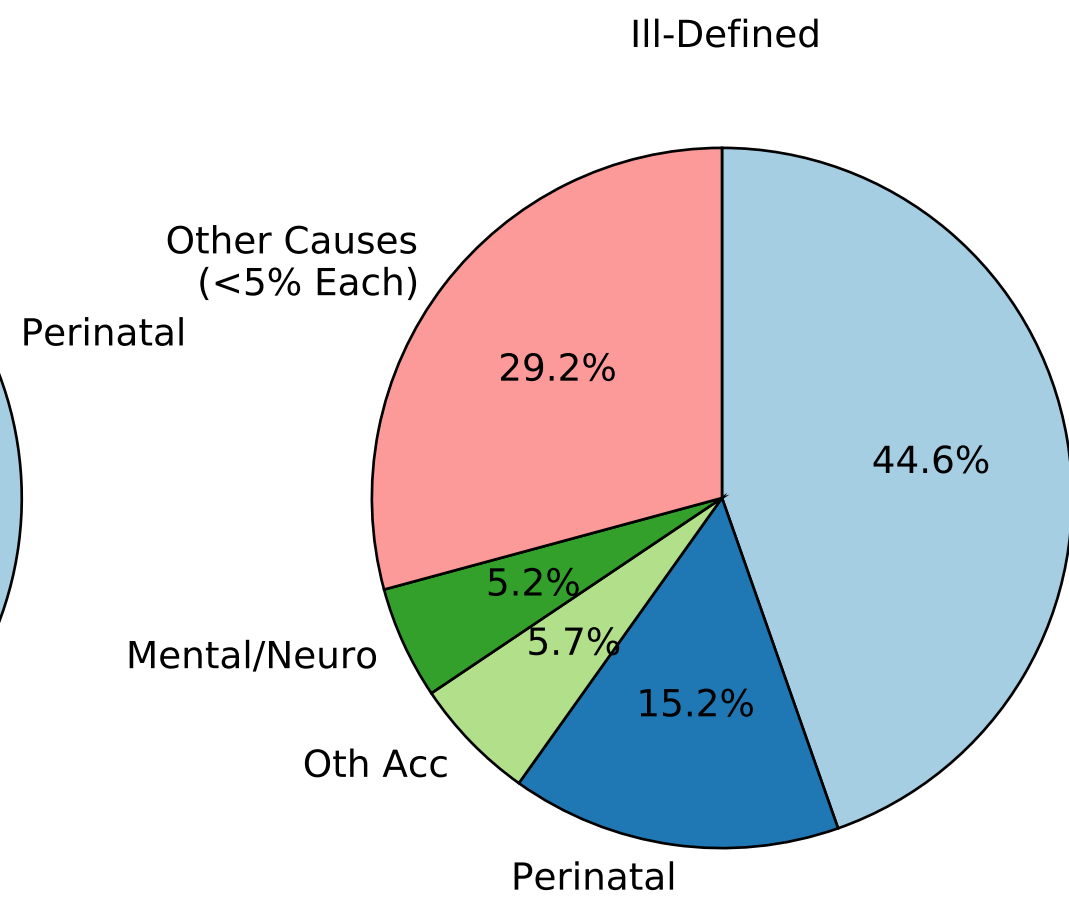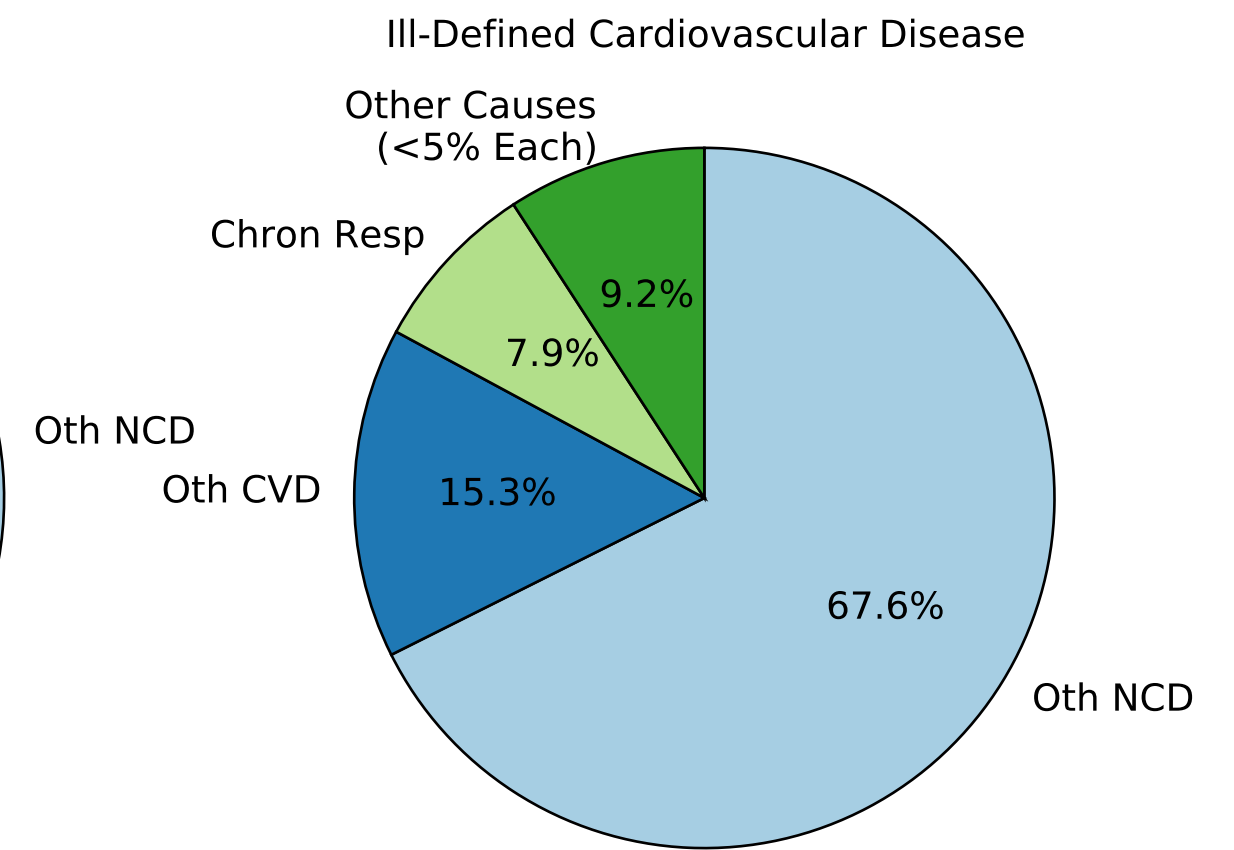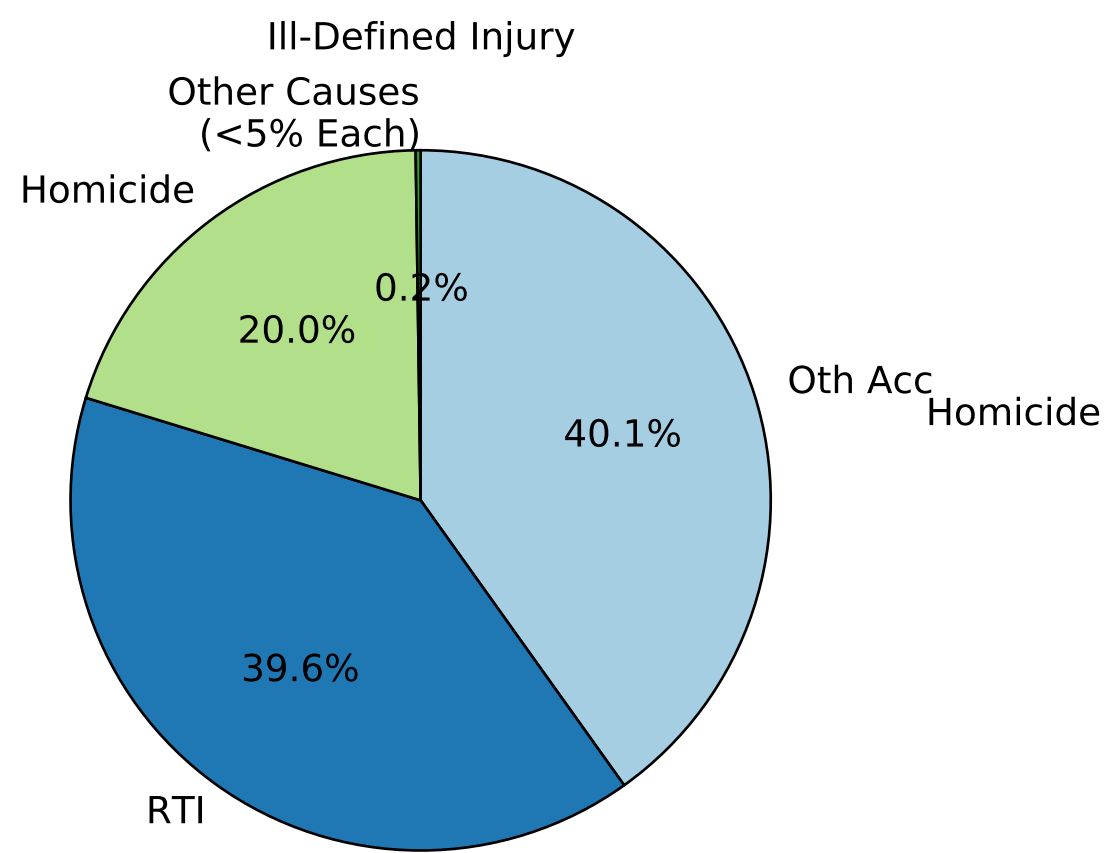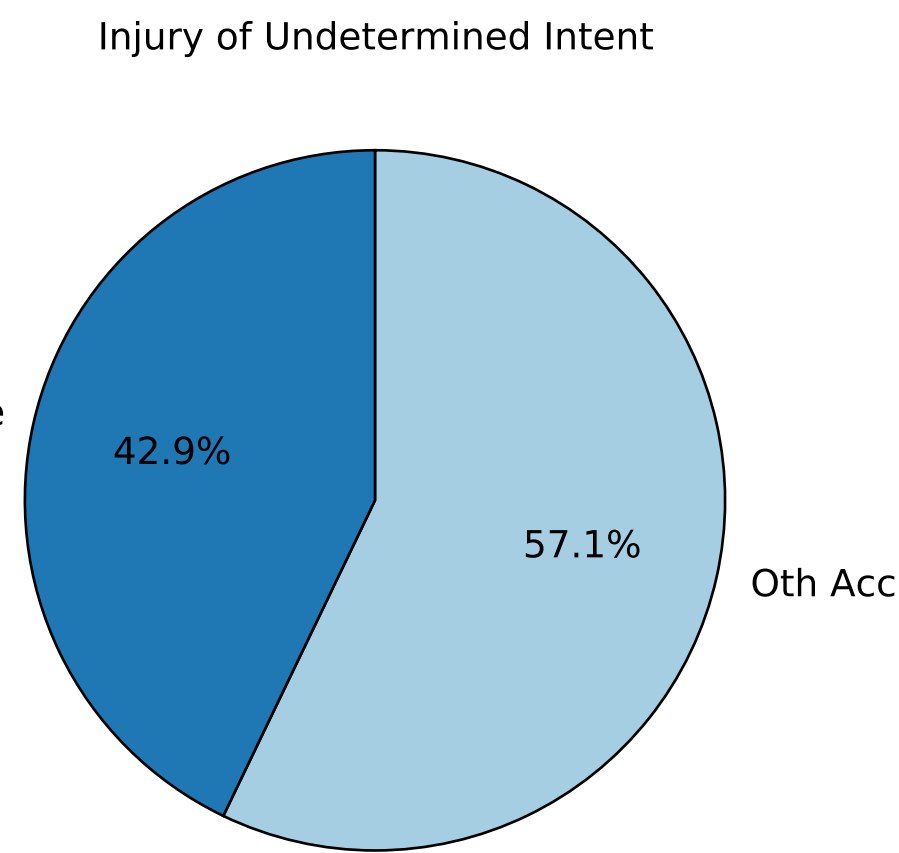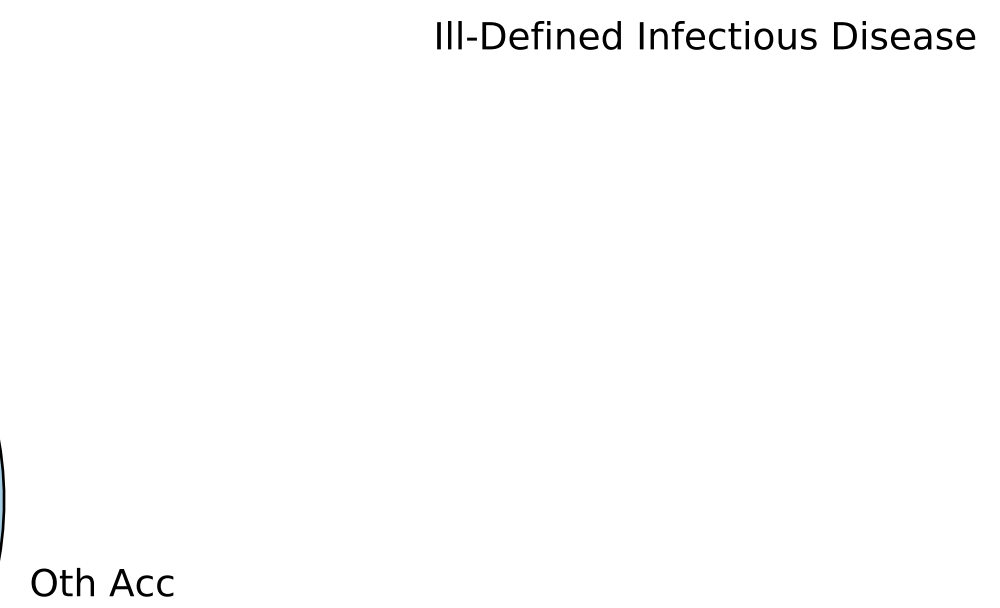

ICD 9  
Female, Age 5

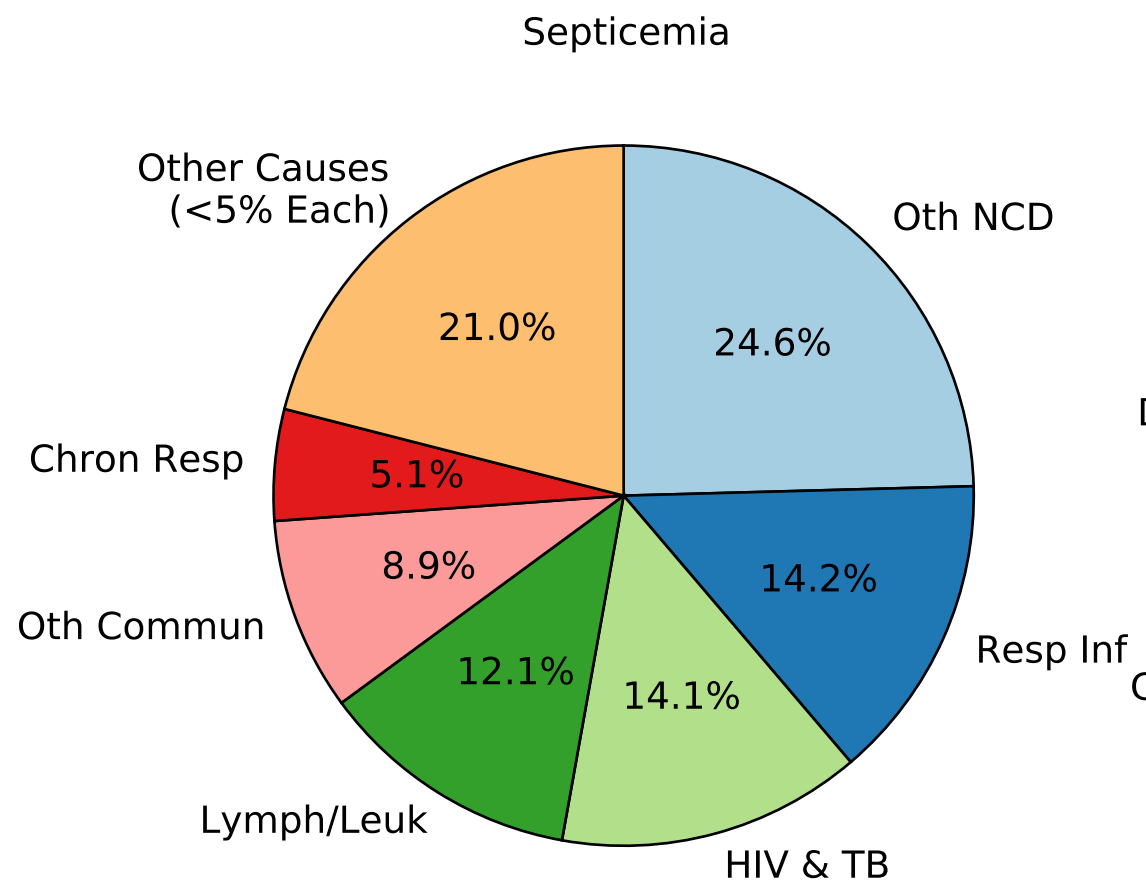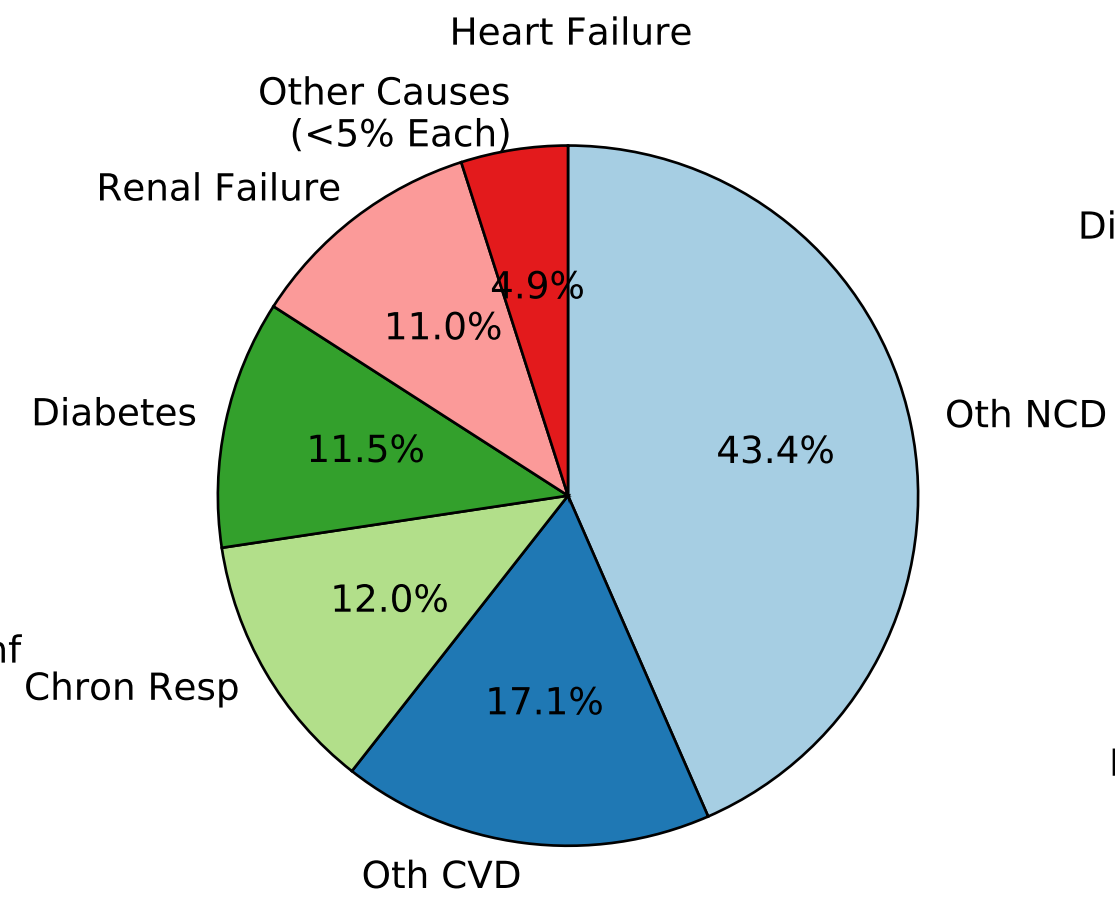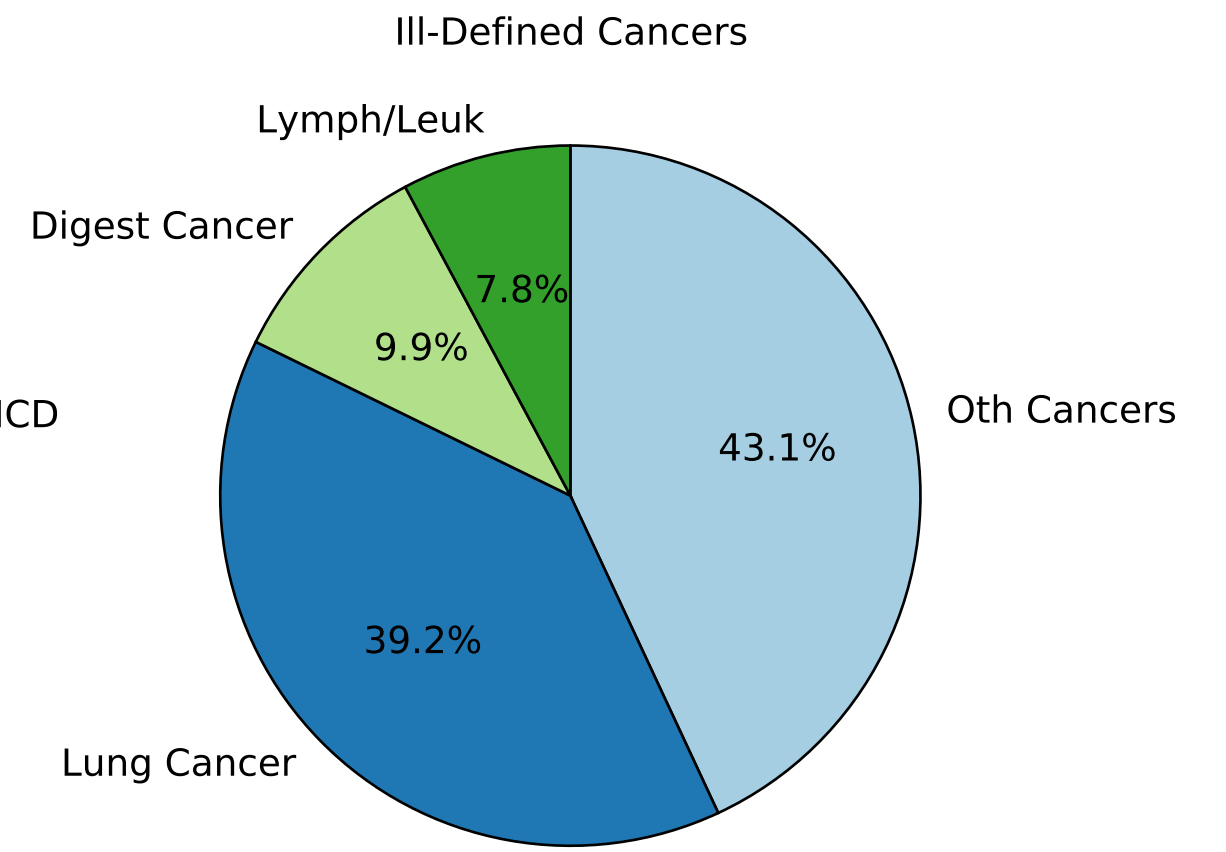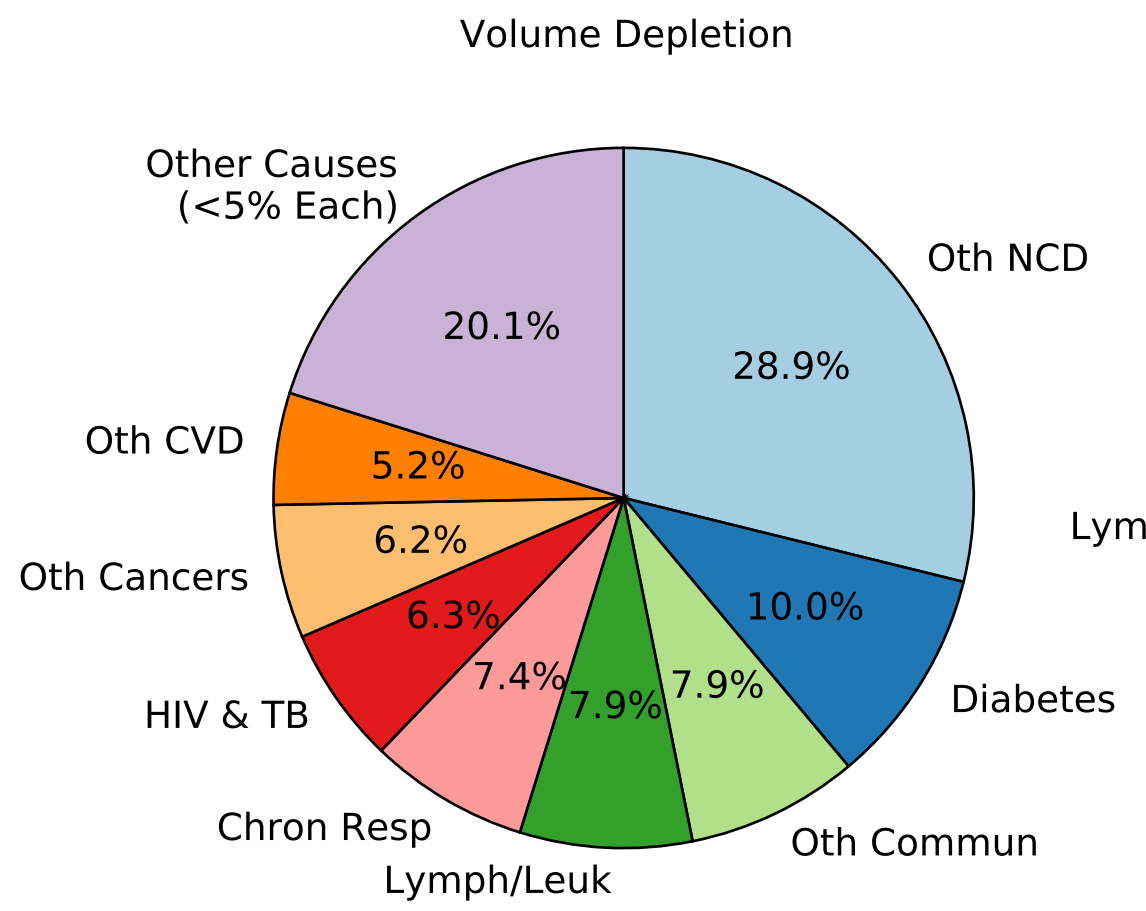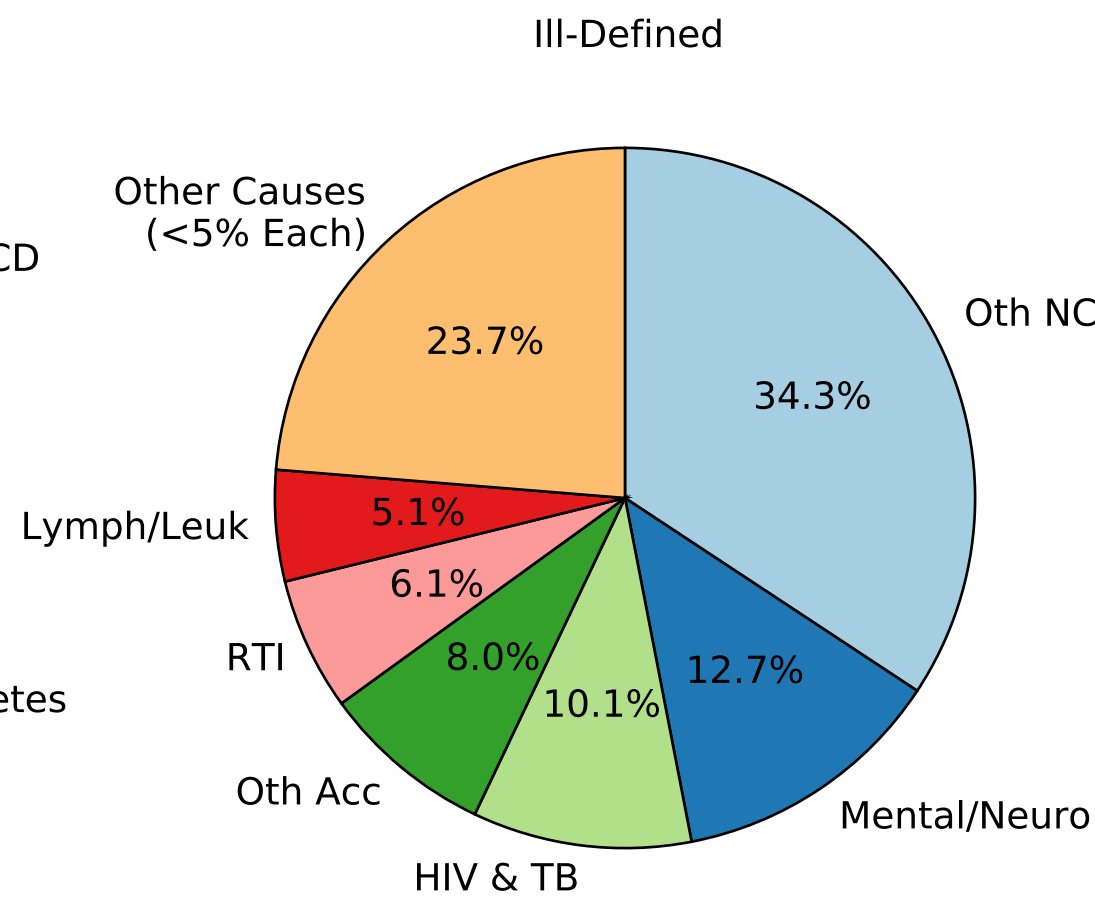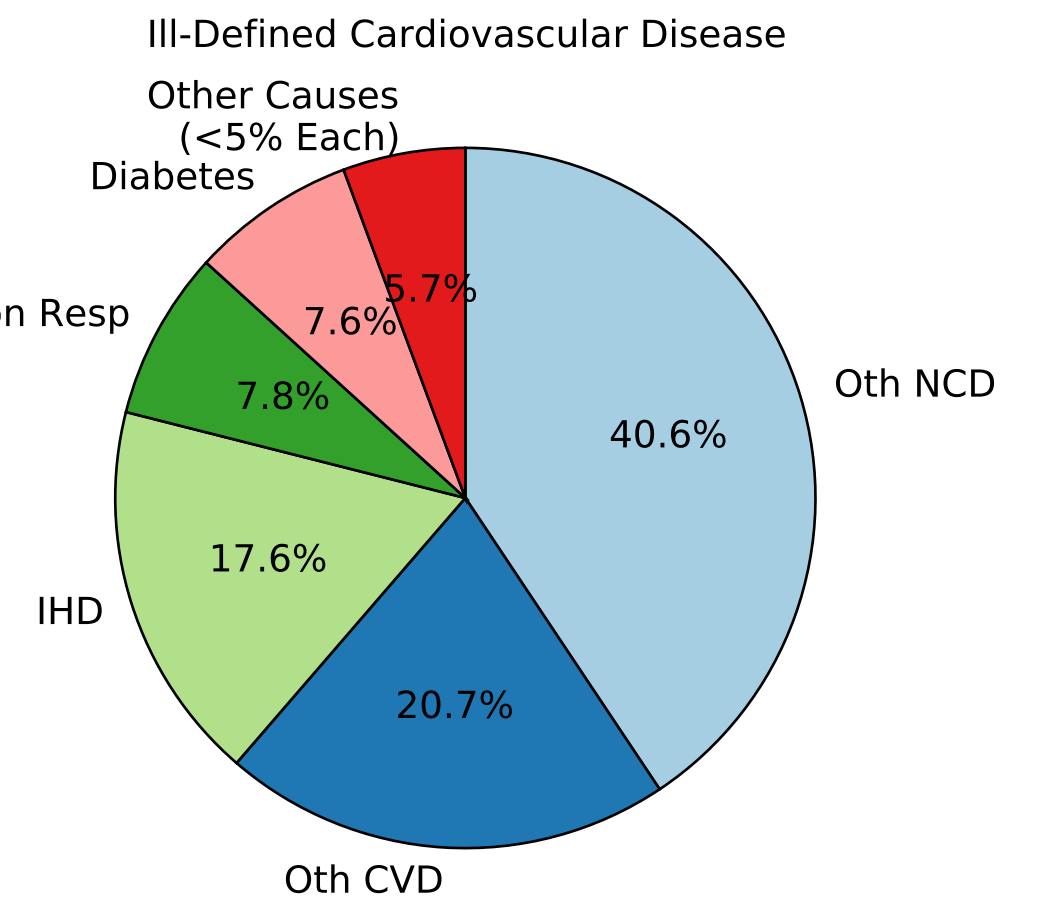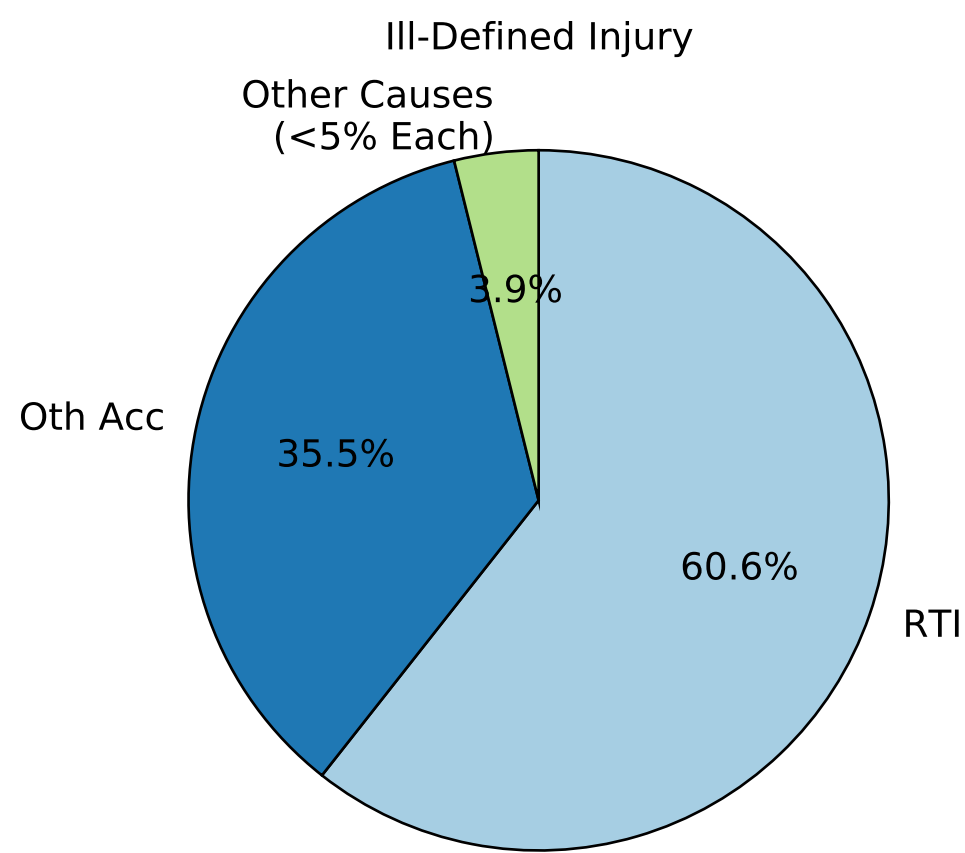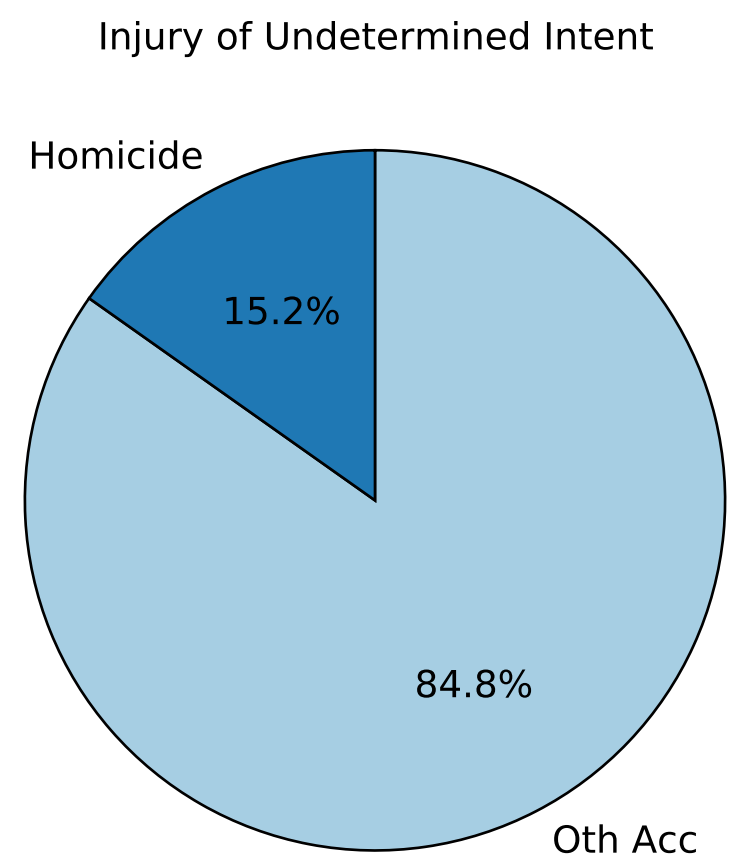

Ill-Defined Infectious Disease

ICD 9  
Female, Age 10

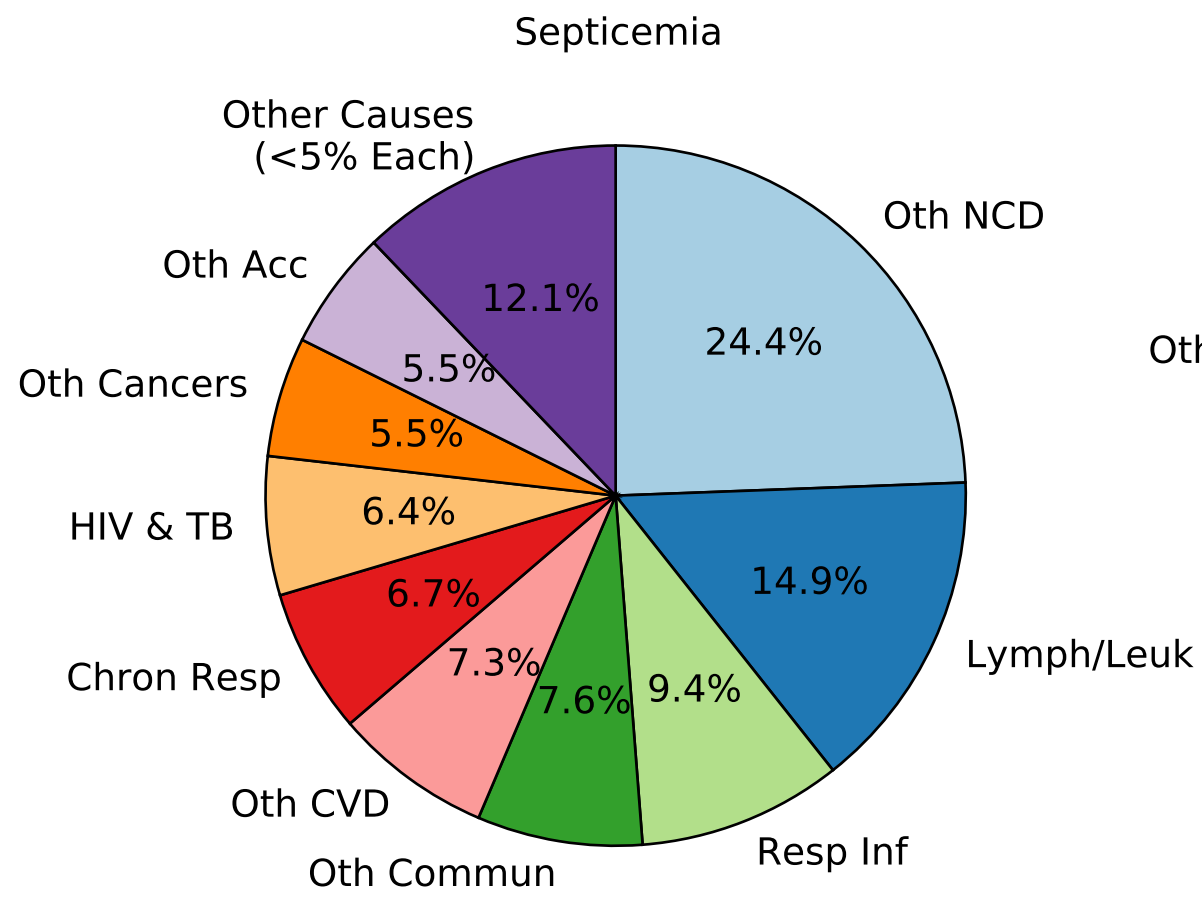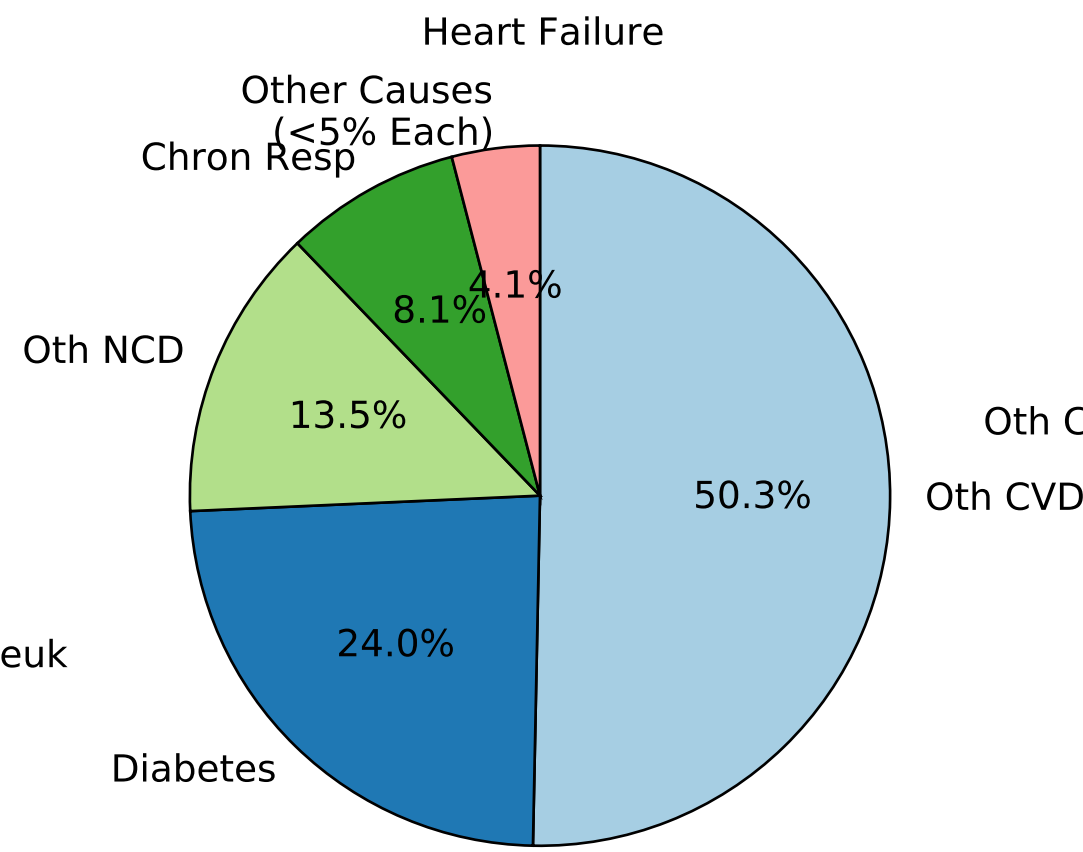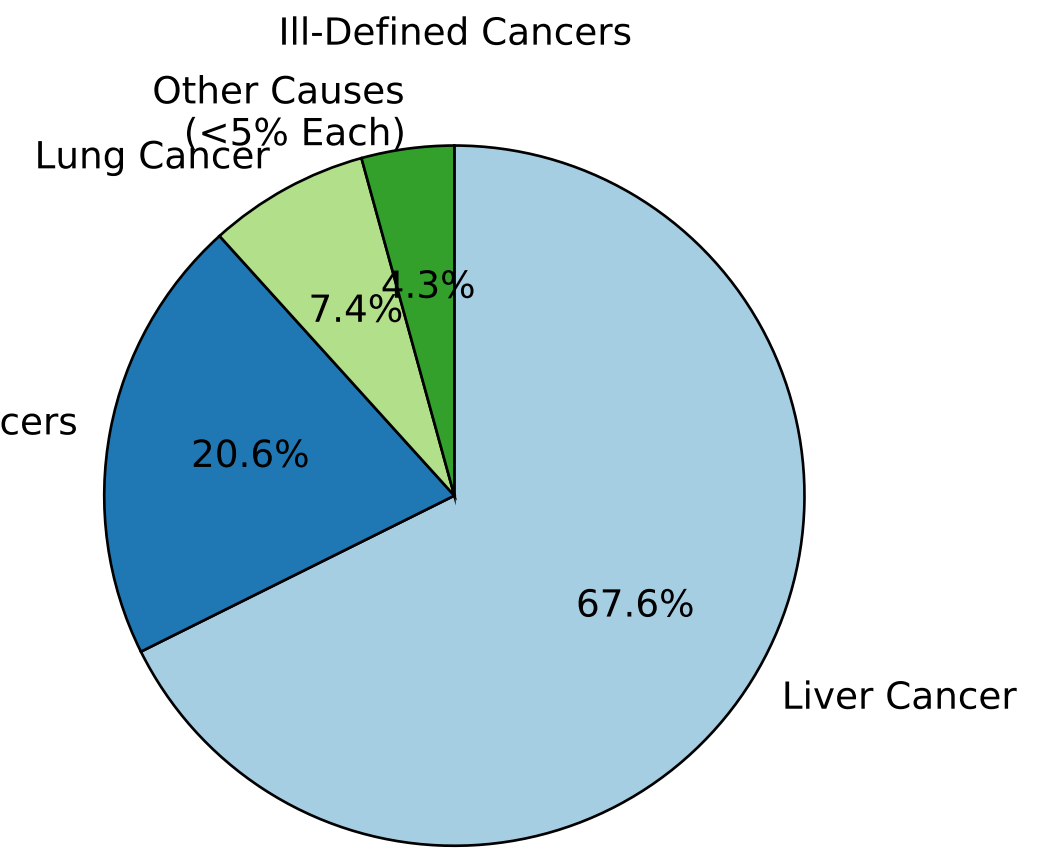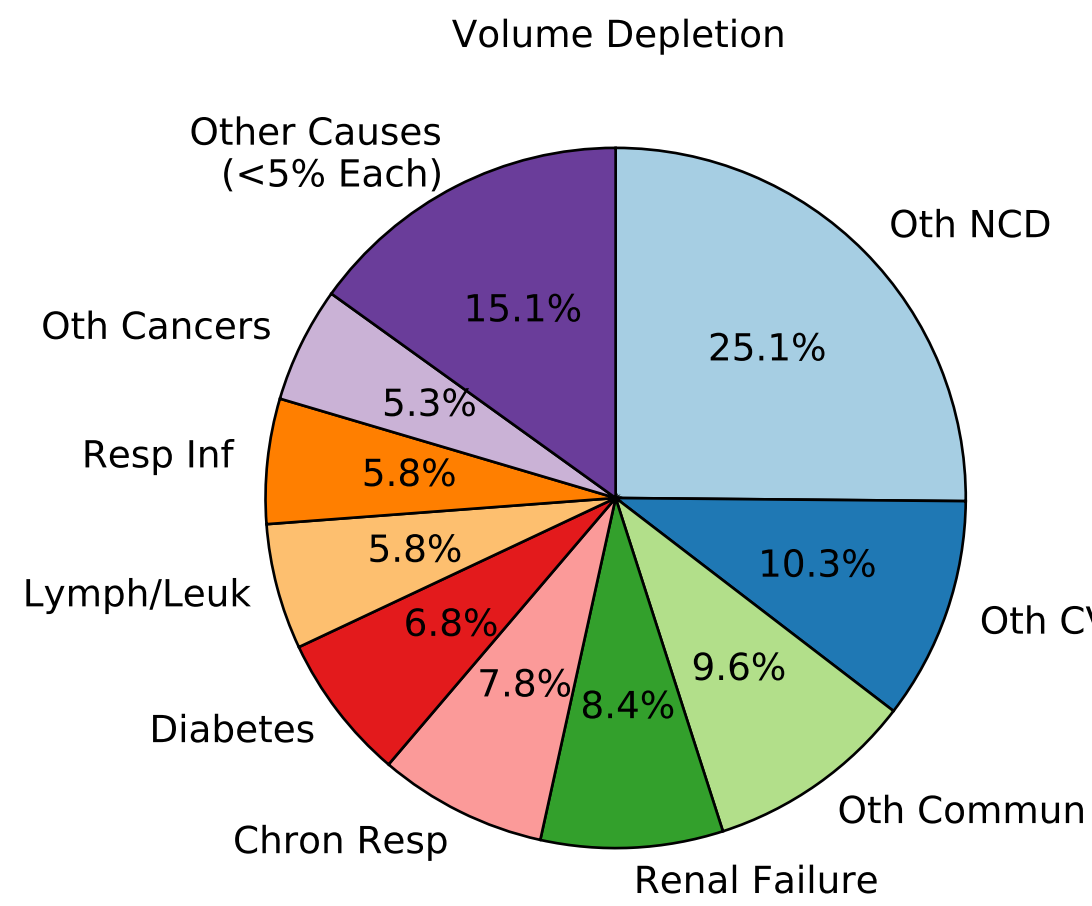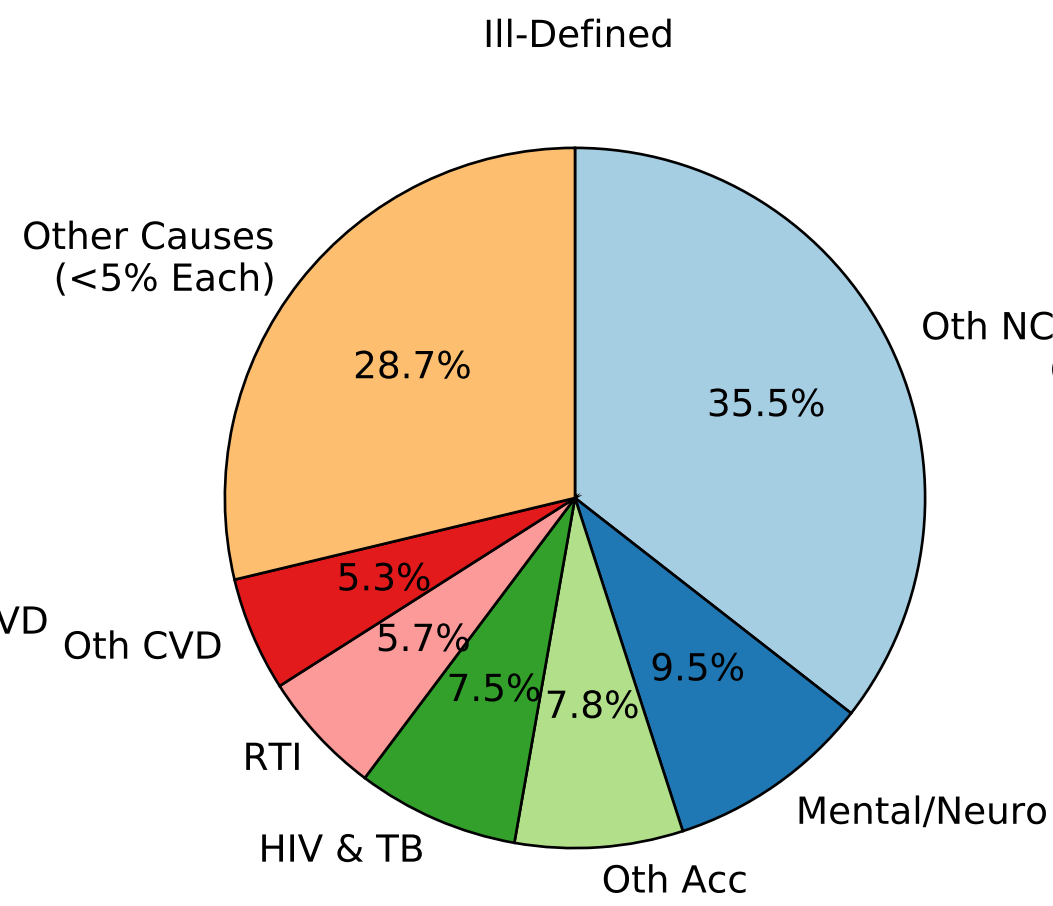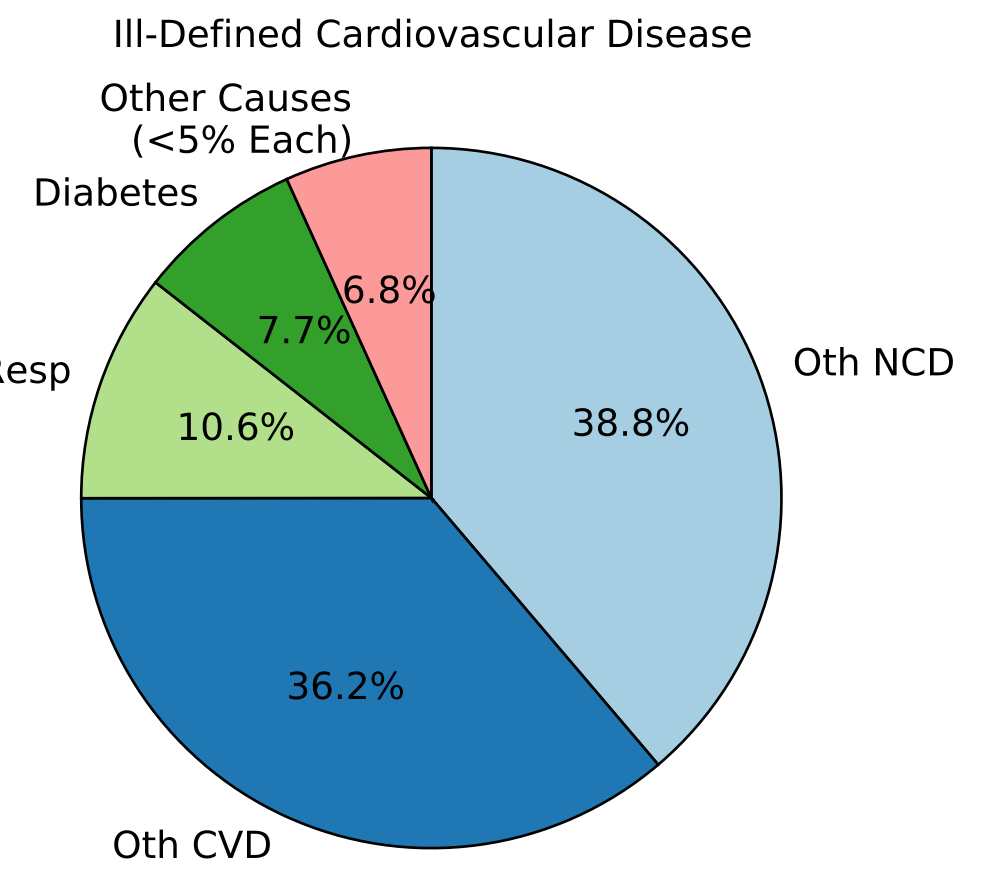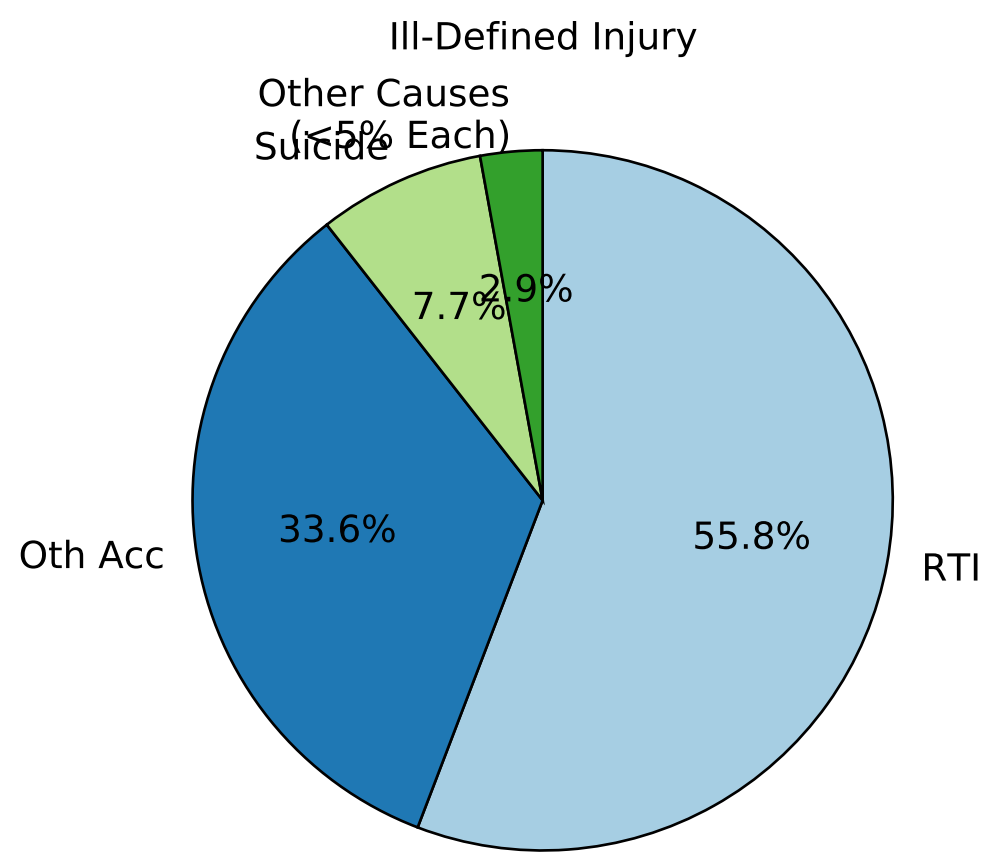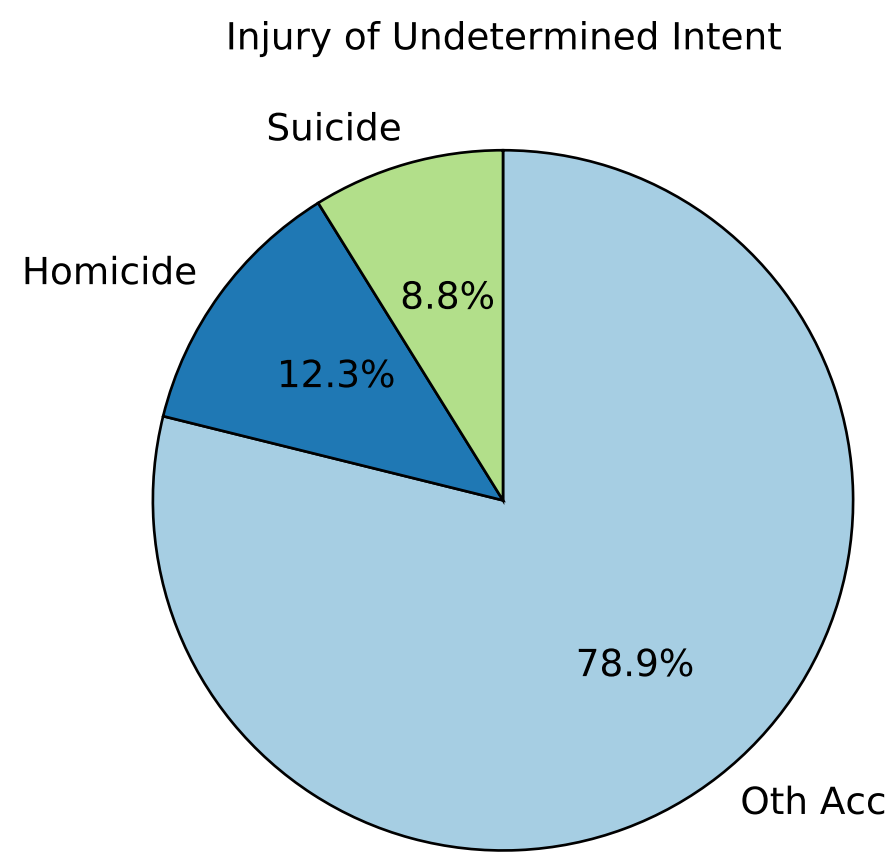

Ill-Defined Infectious Disease

ICD 9  
Female, Age 15

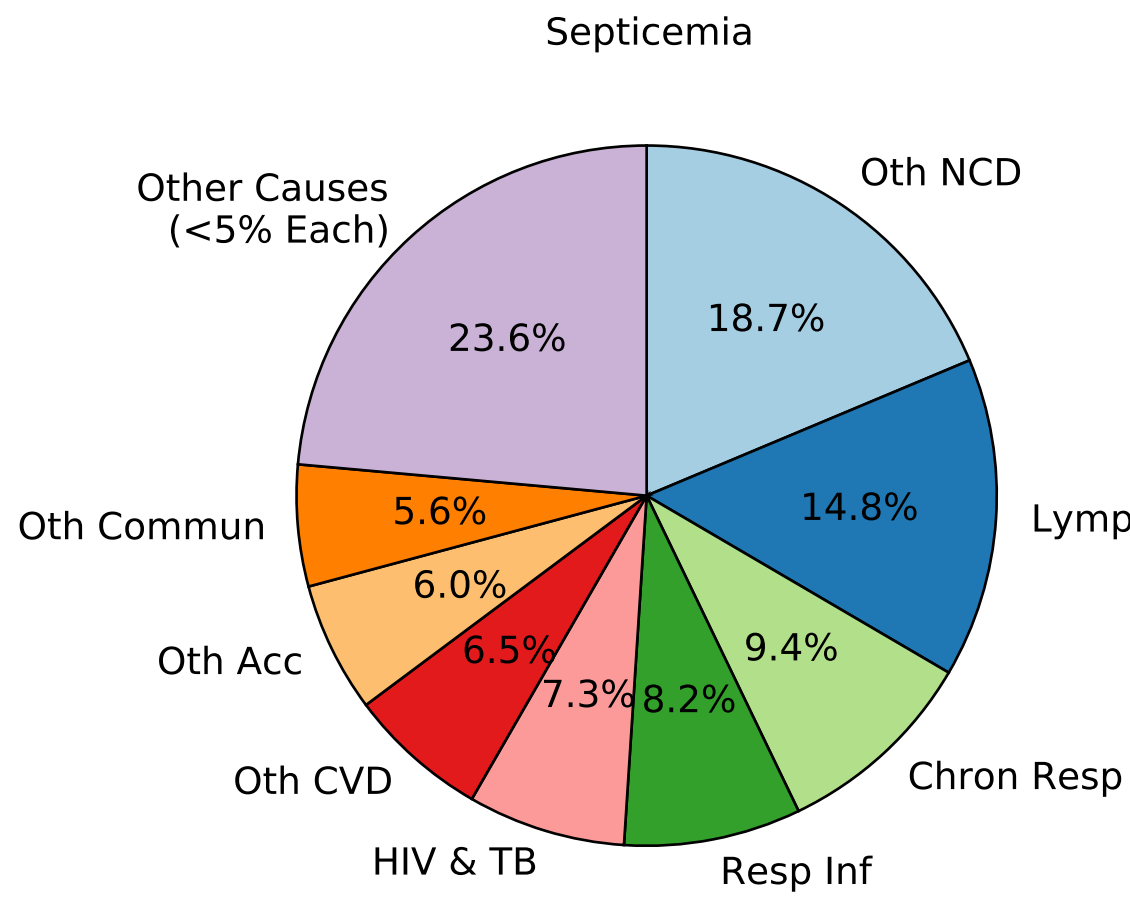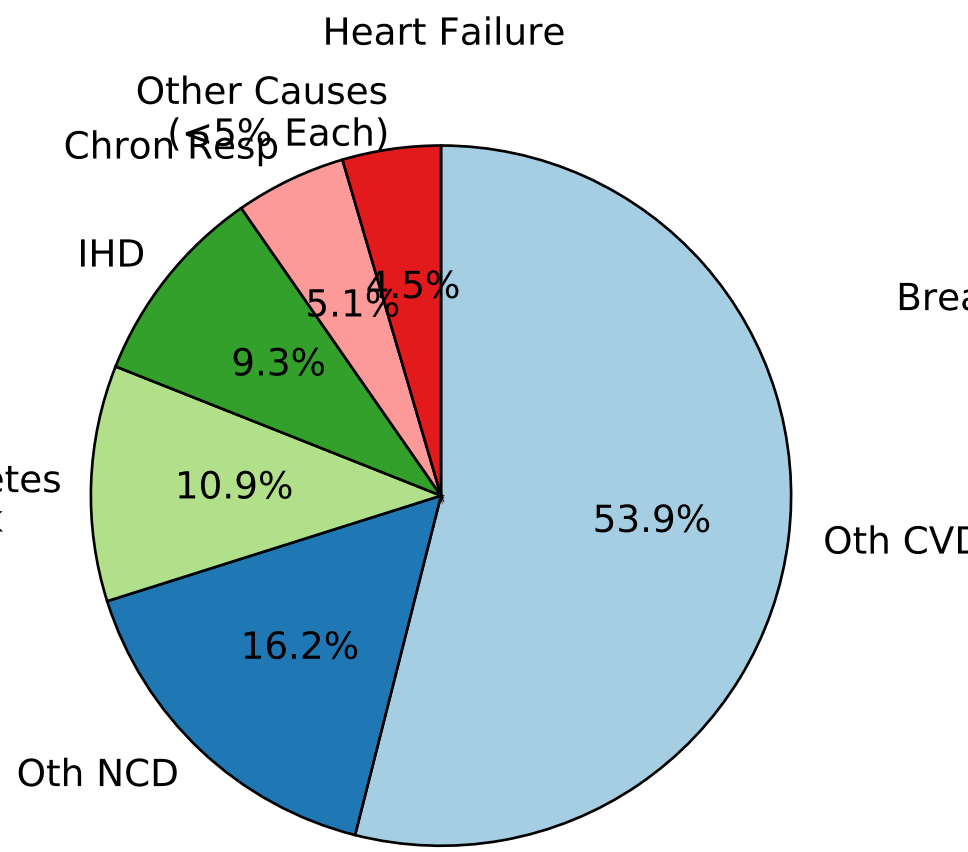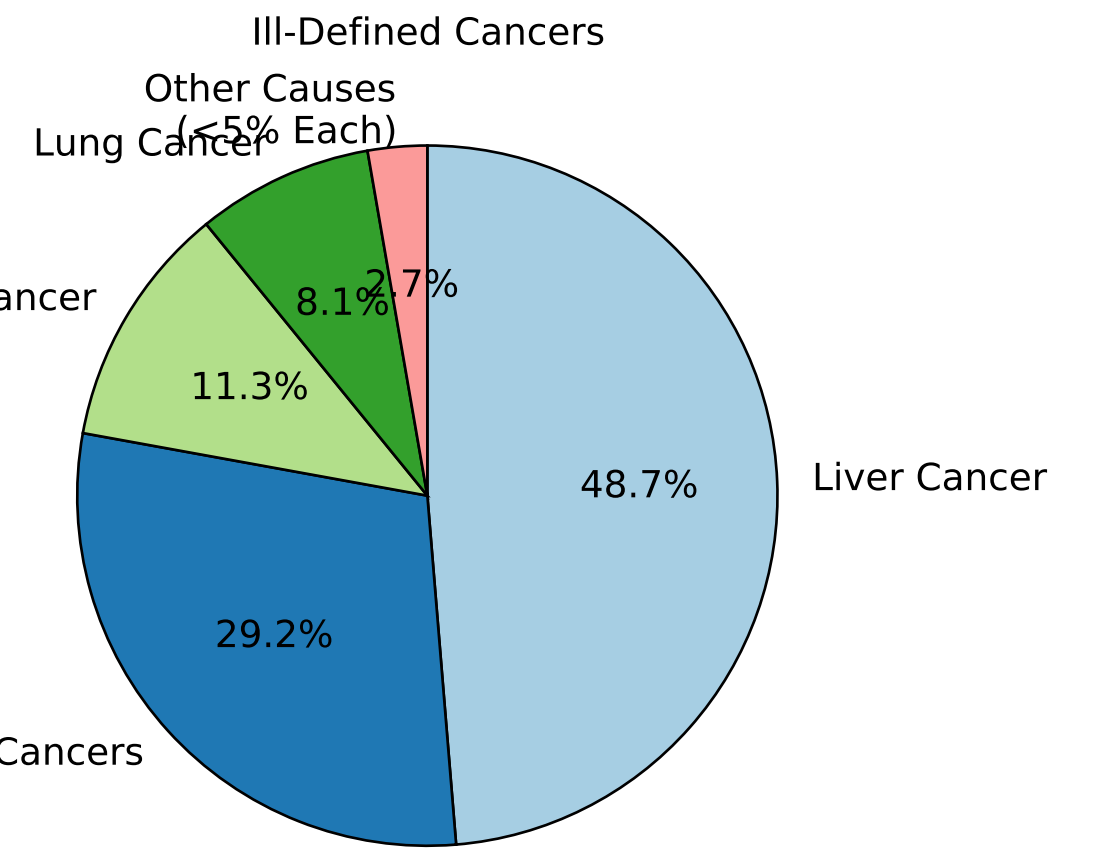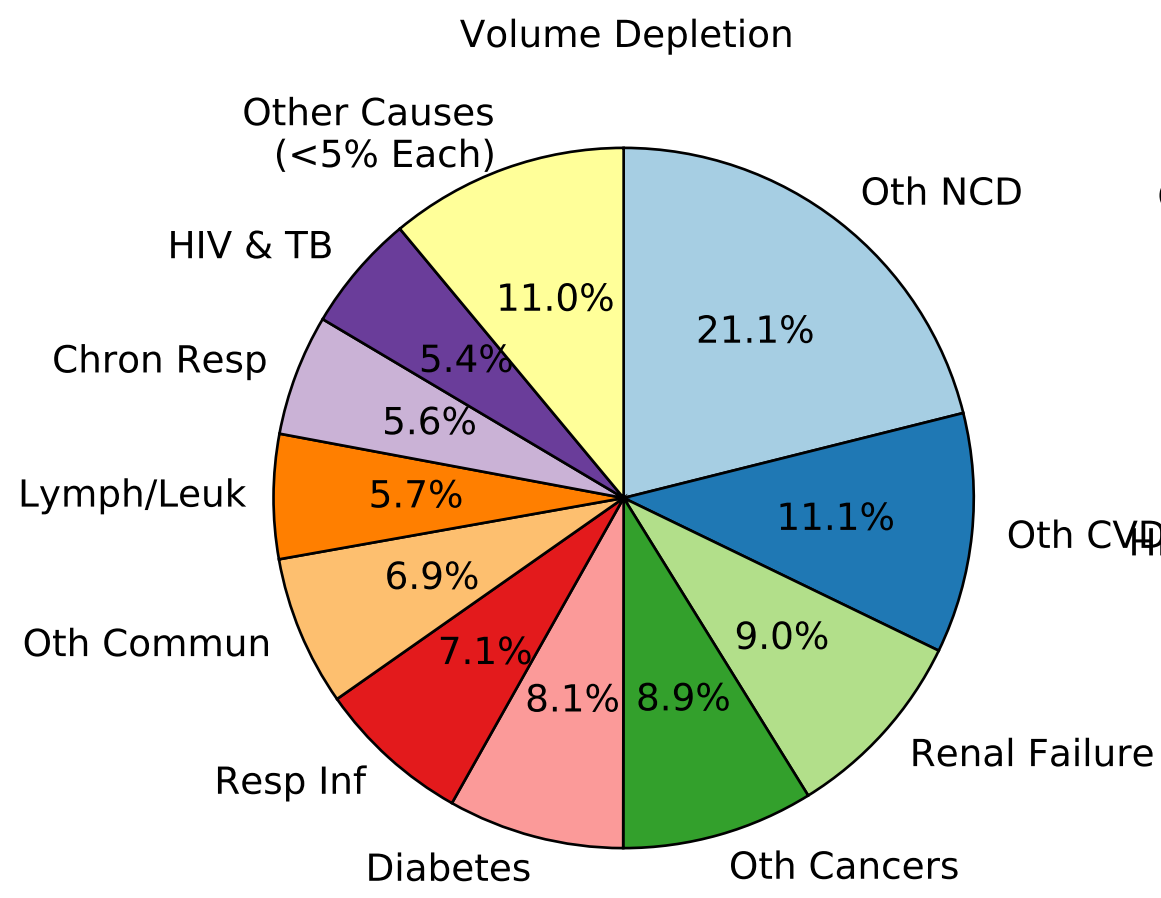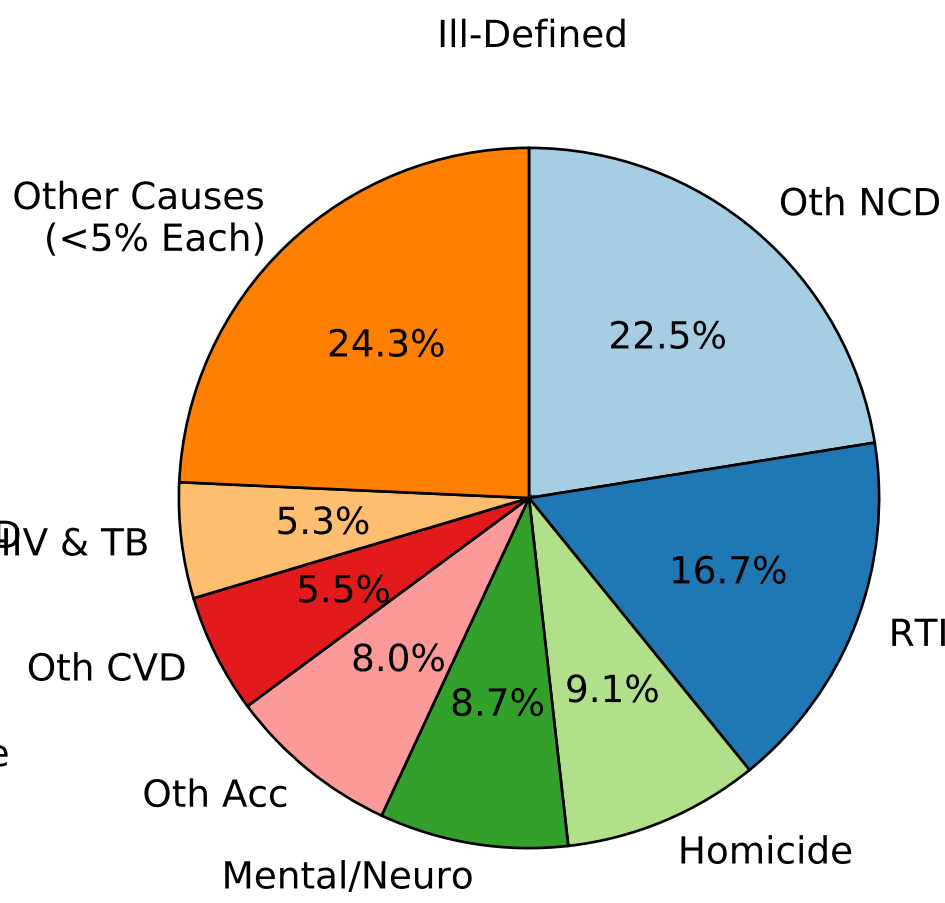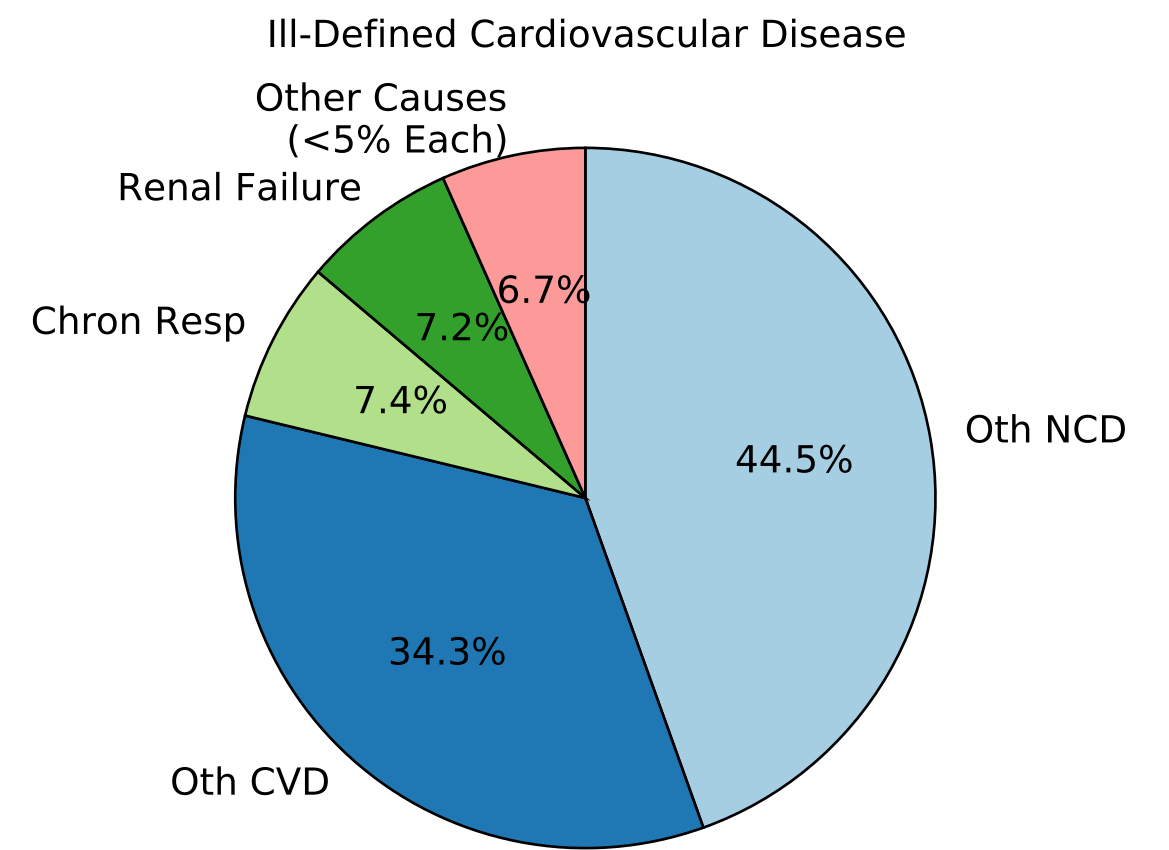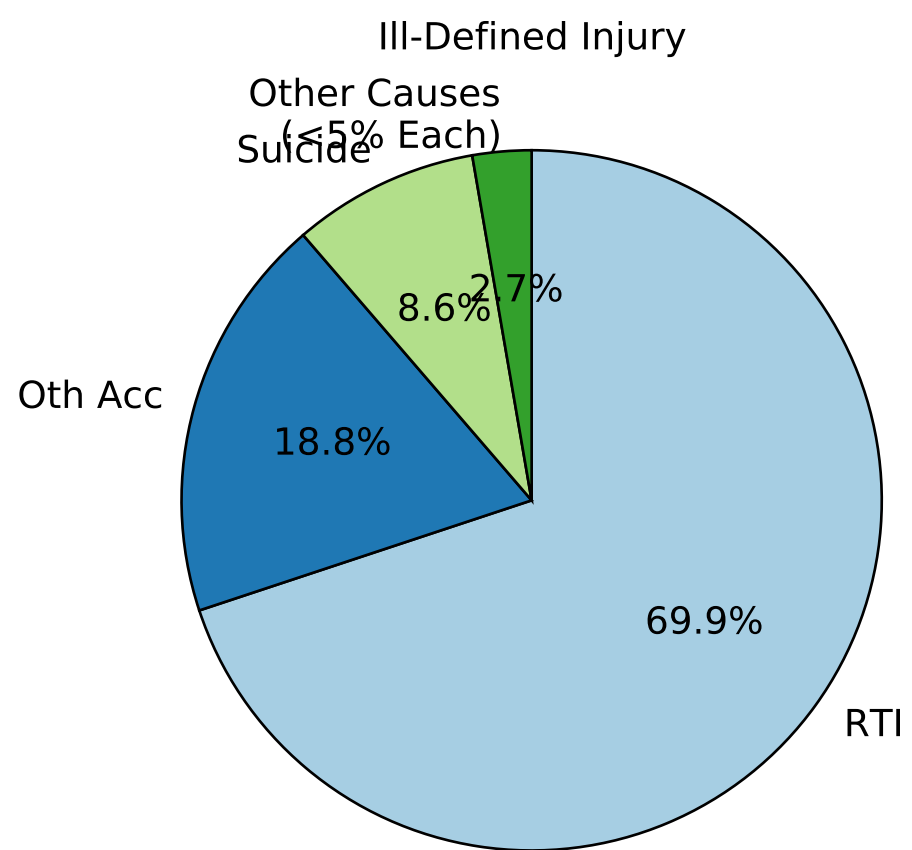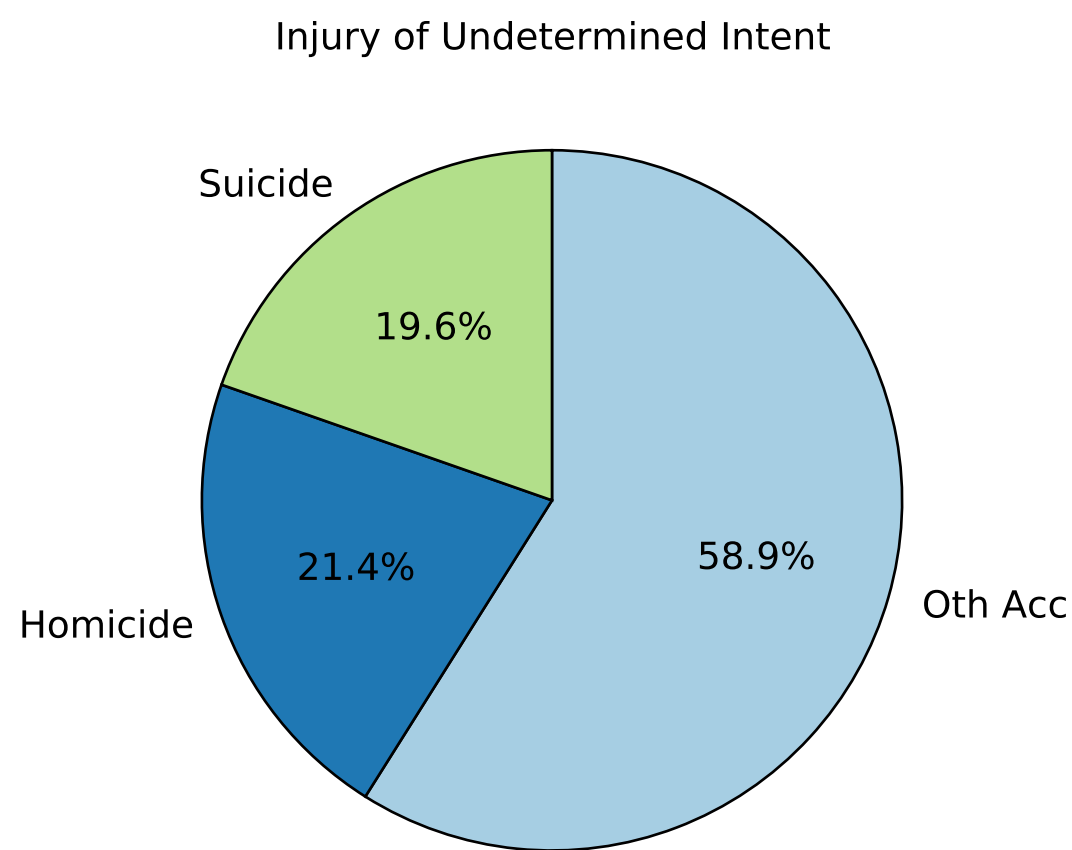

III-Defined Infectious Disease

ICD 9  
Female, Age 20

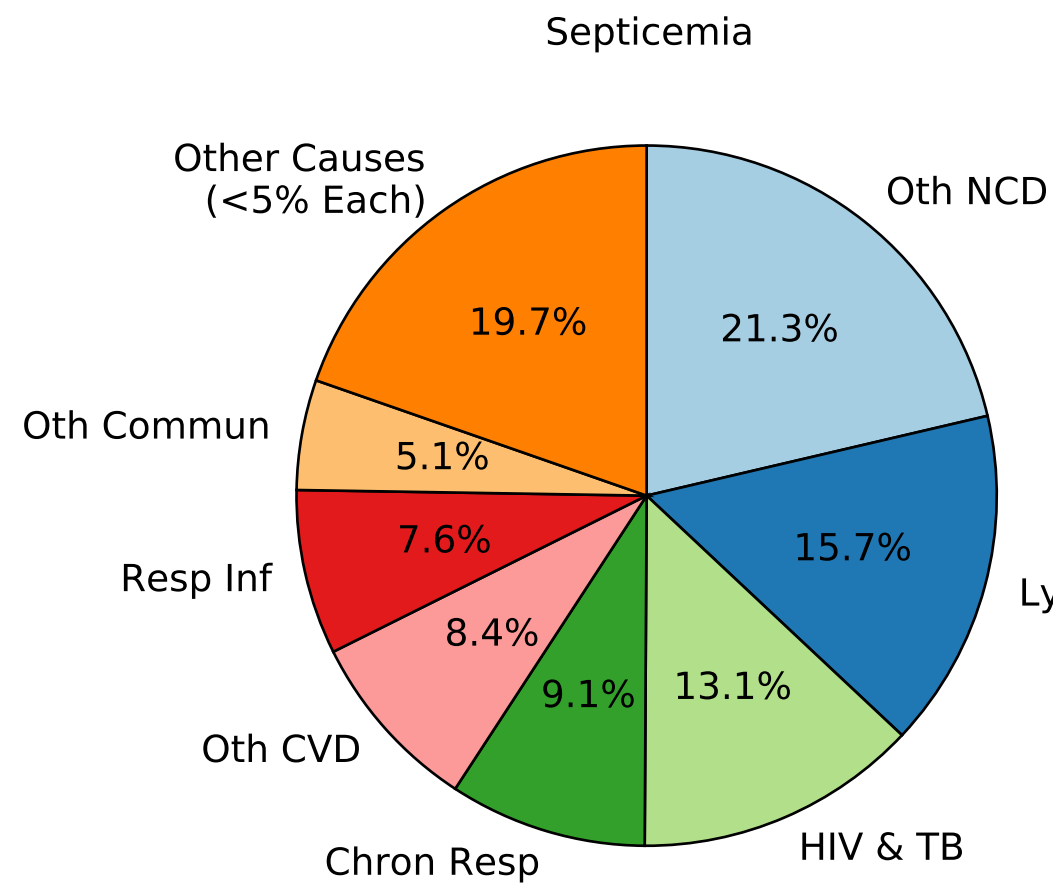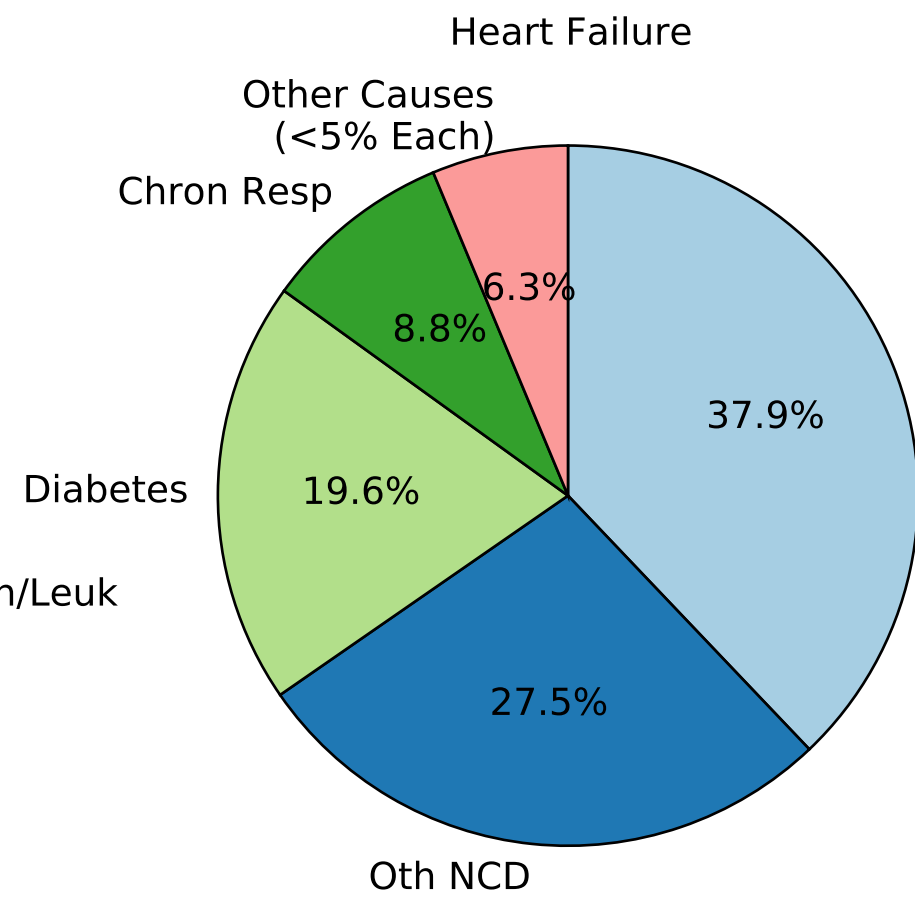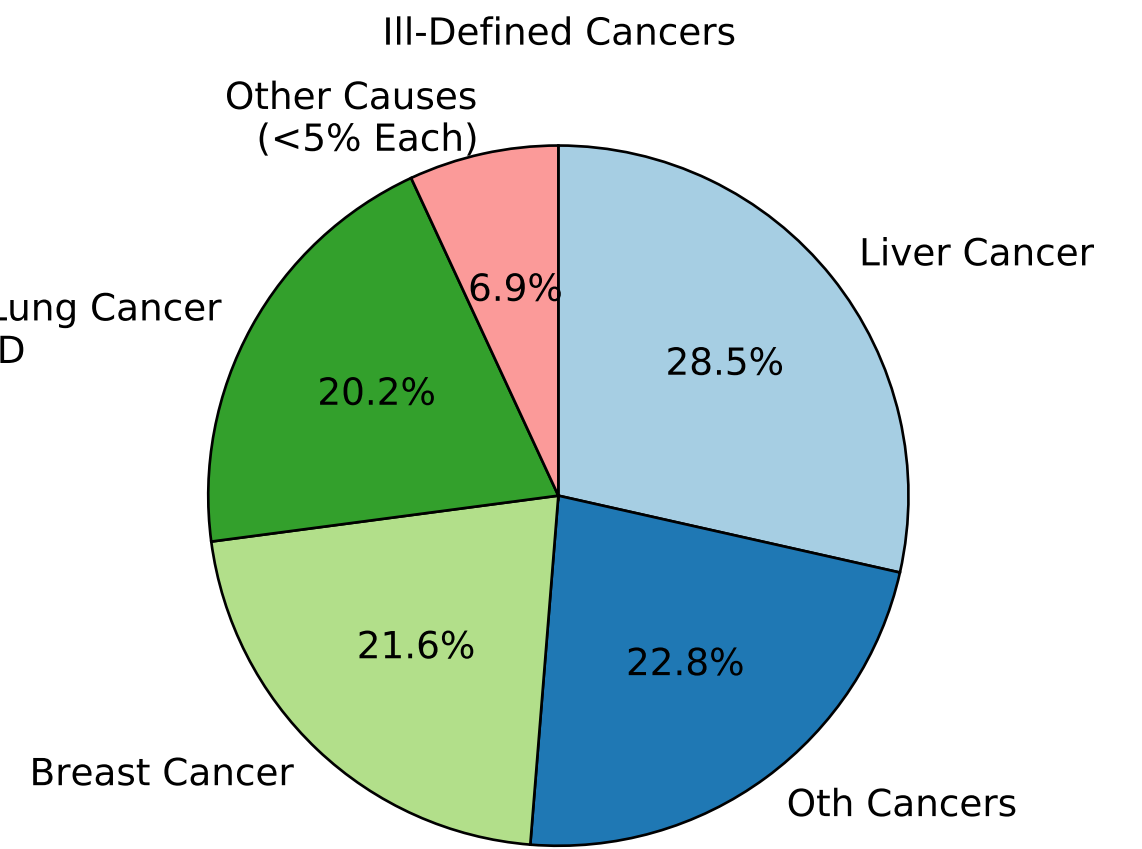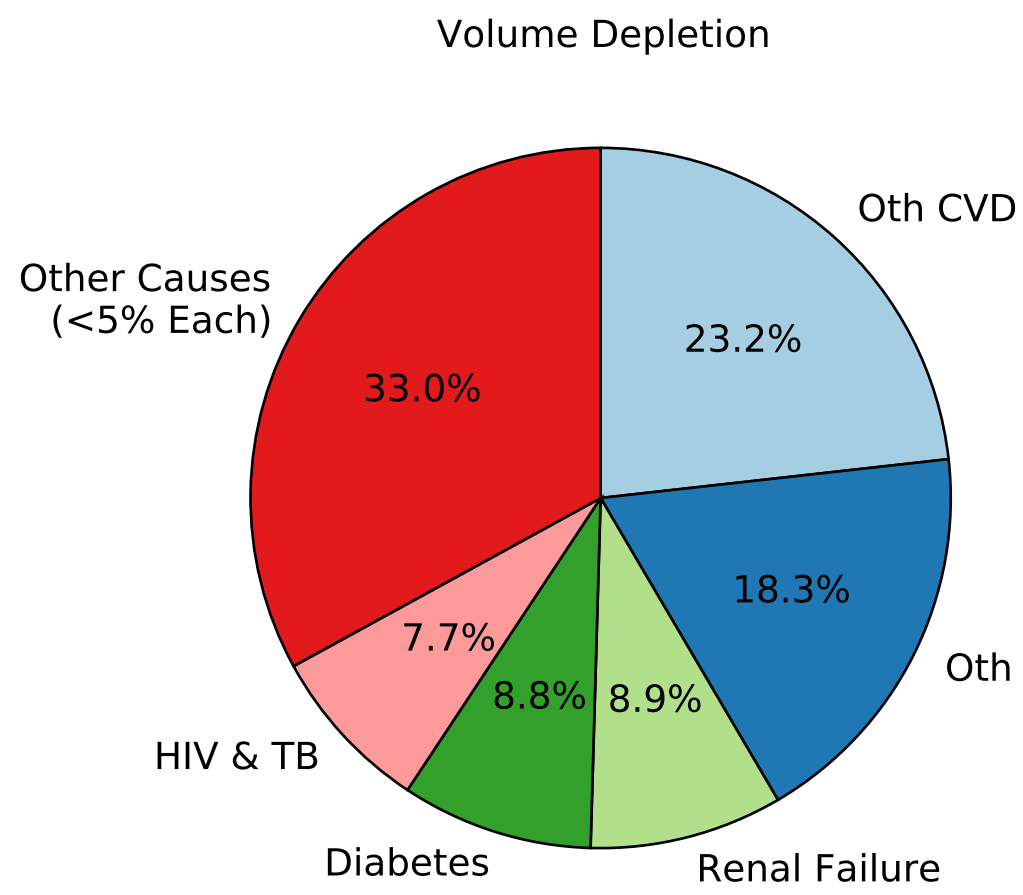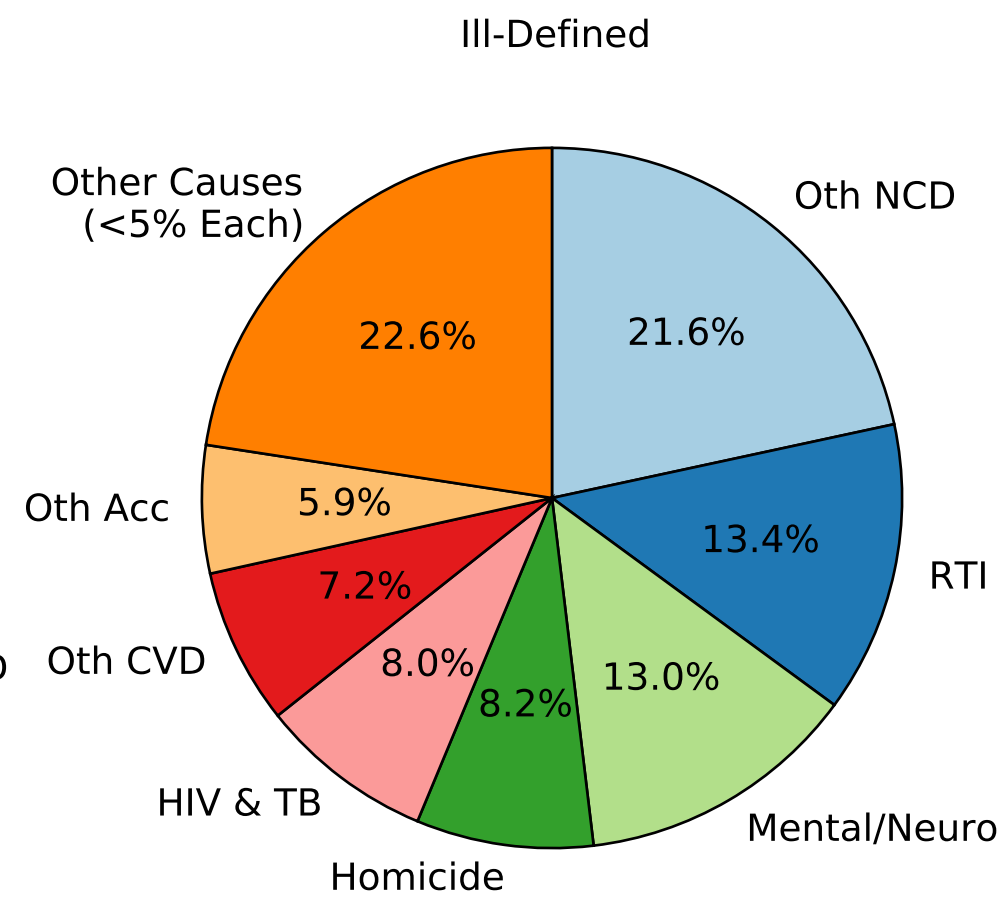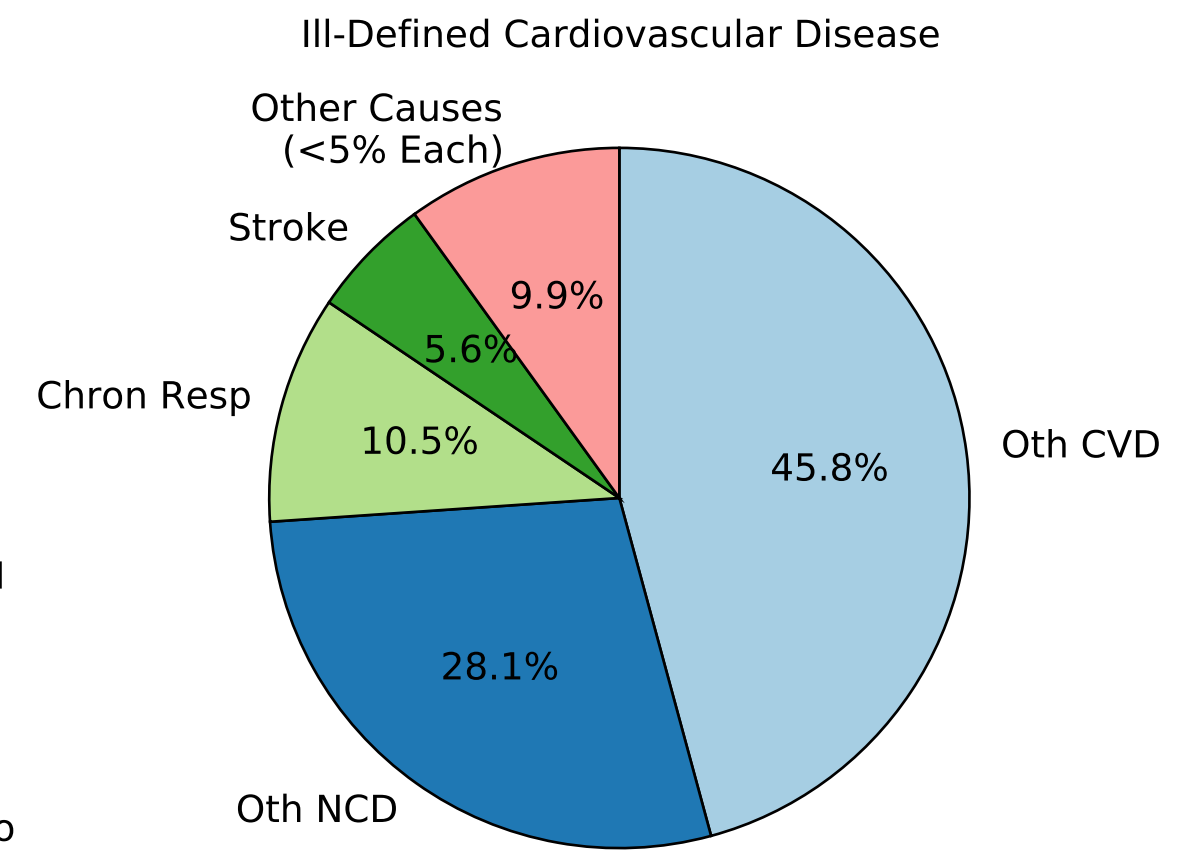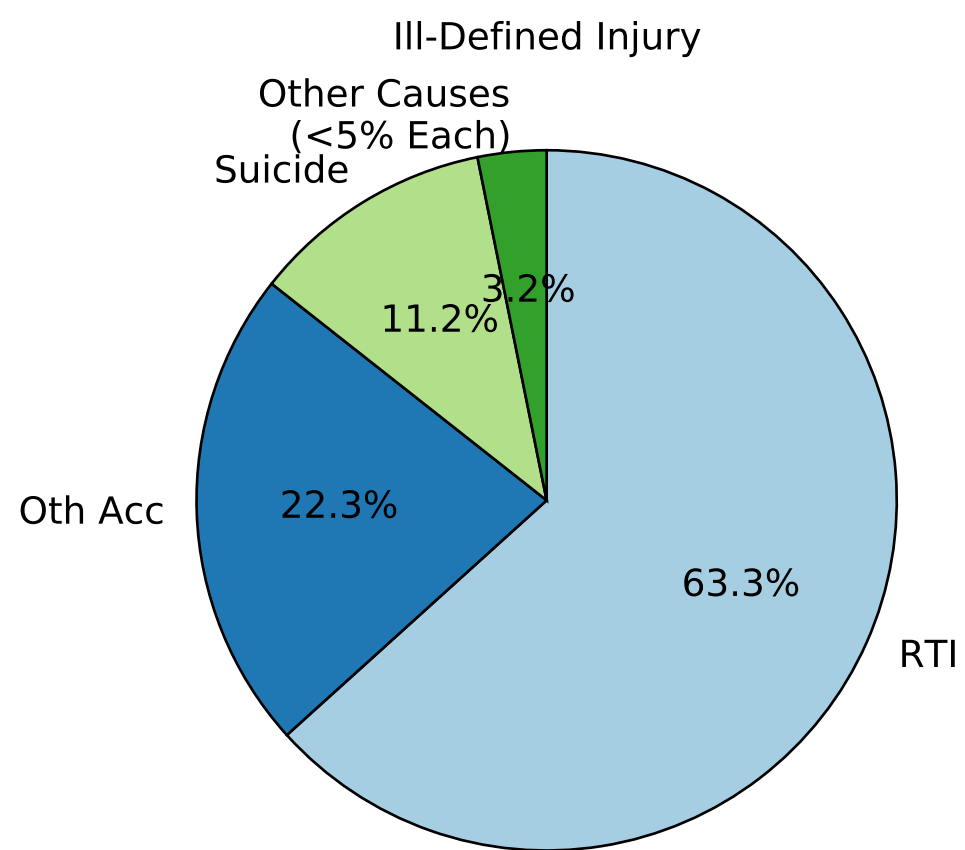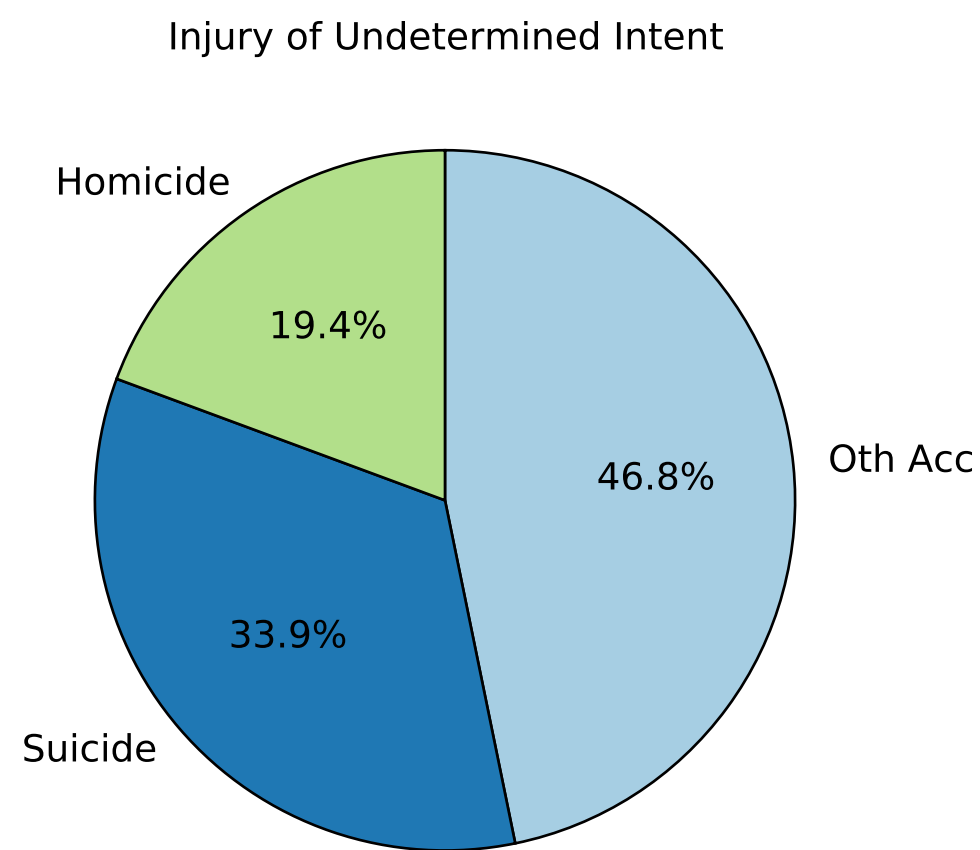

Ill-Defined Infectious Disease

ICD 9  
Female, Age 25

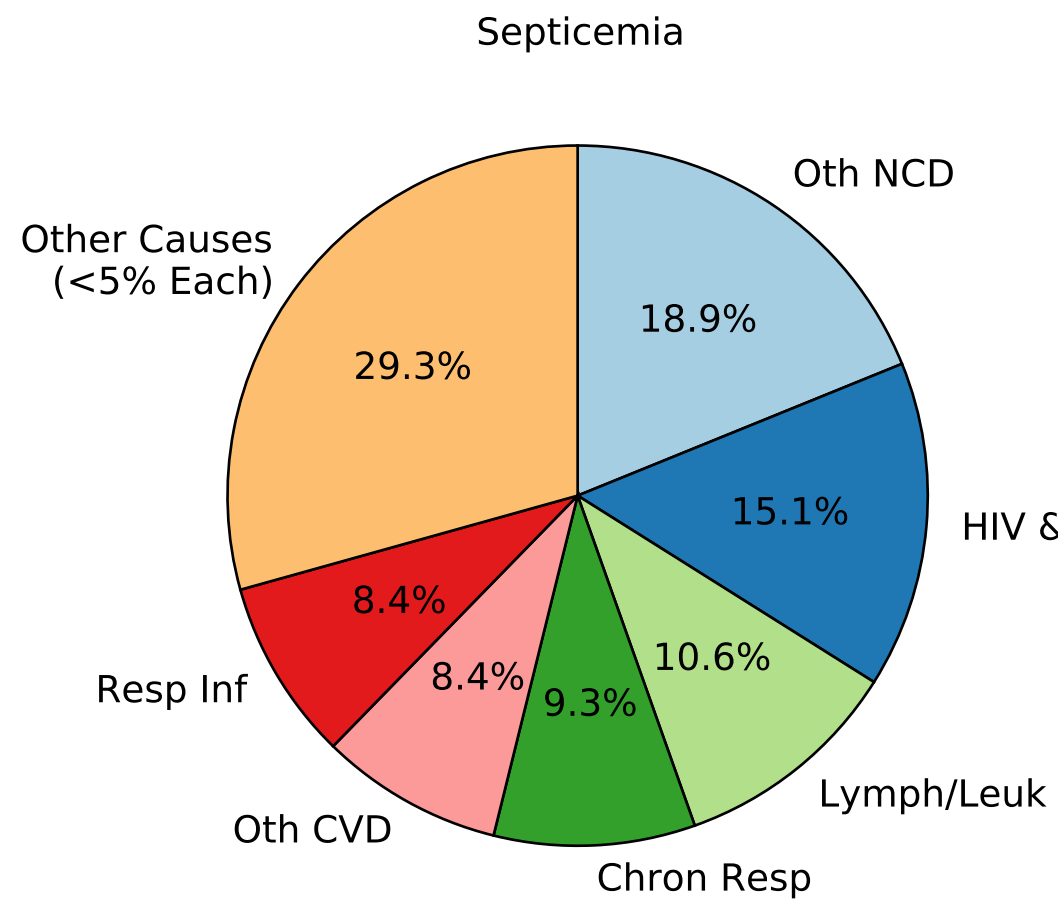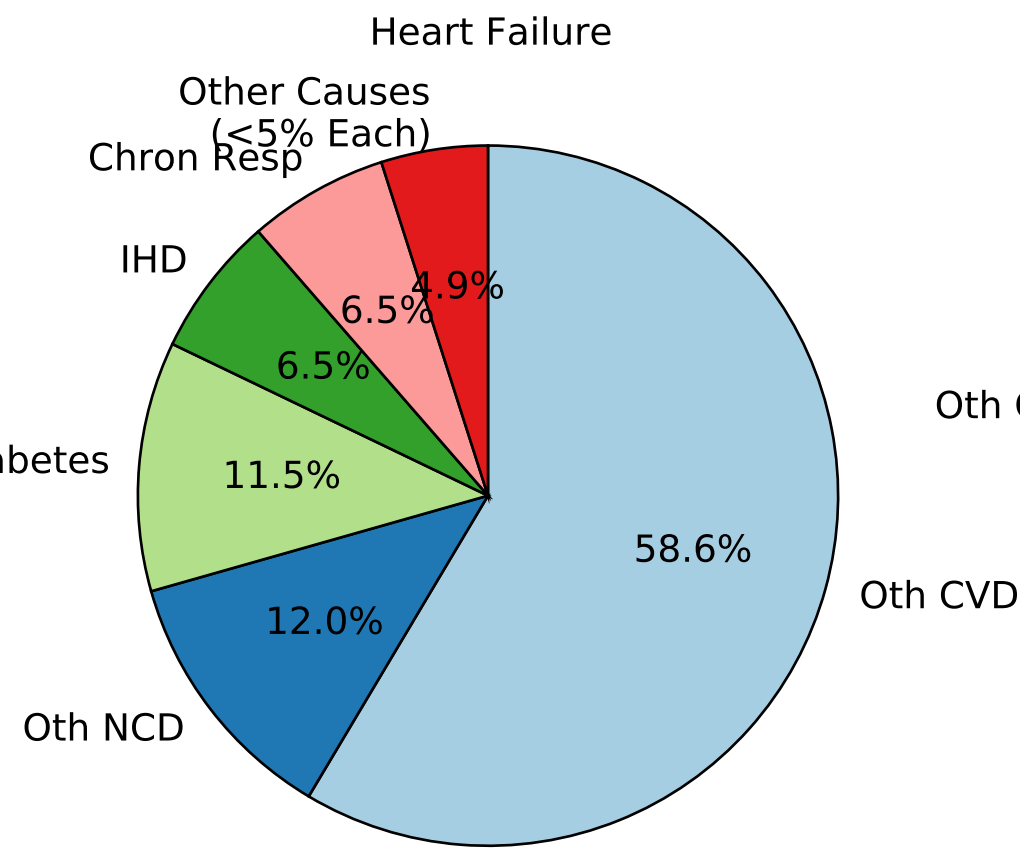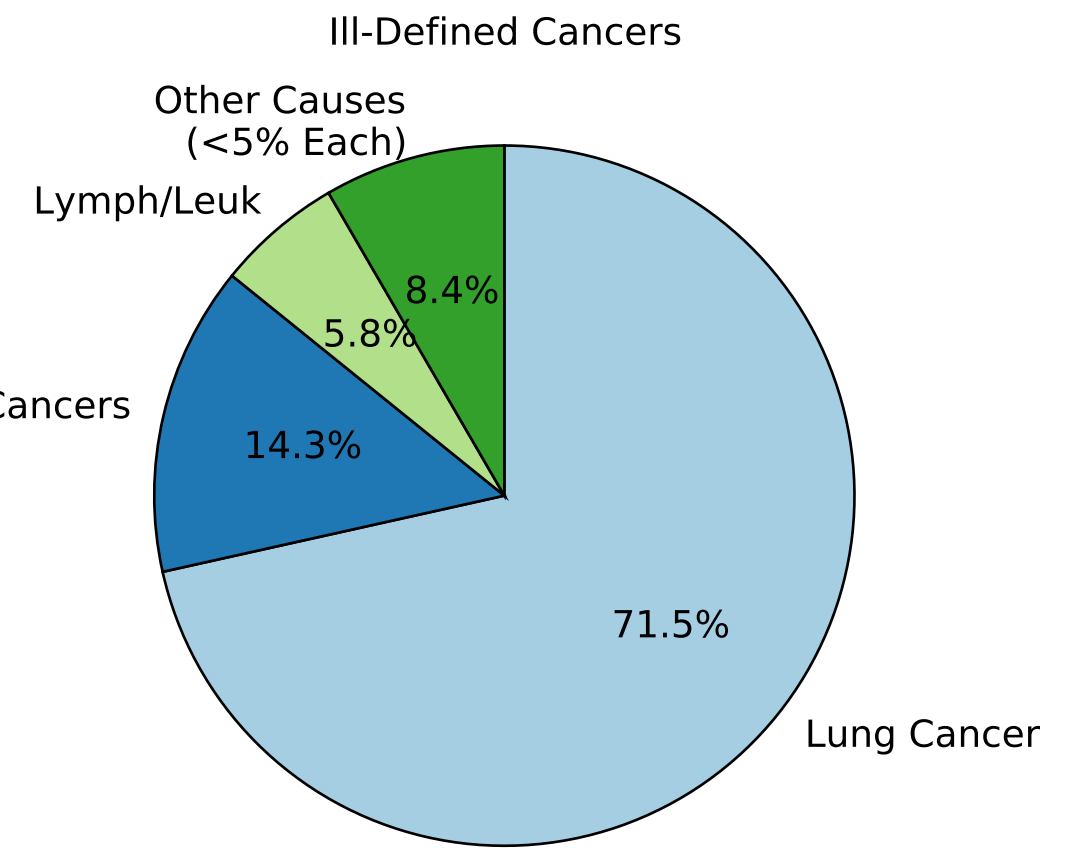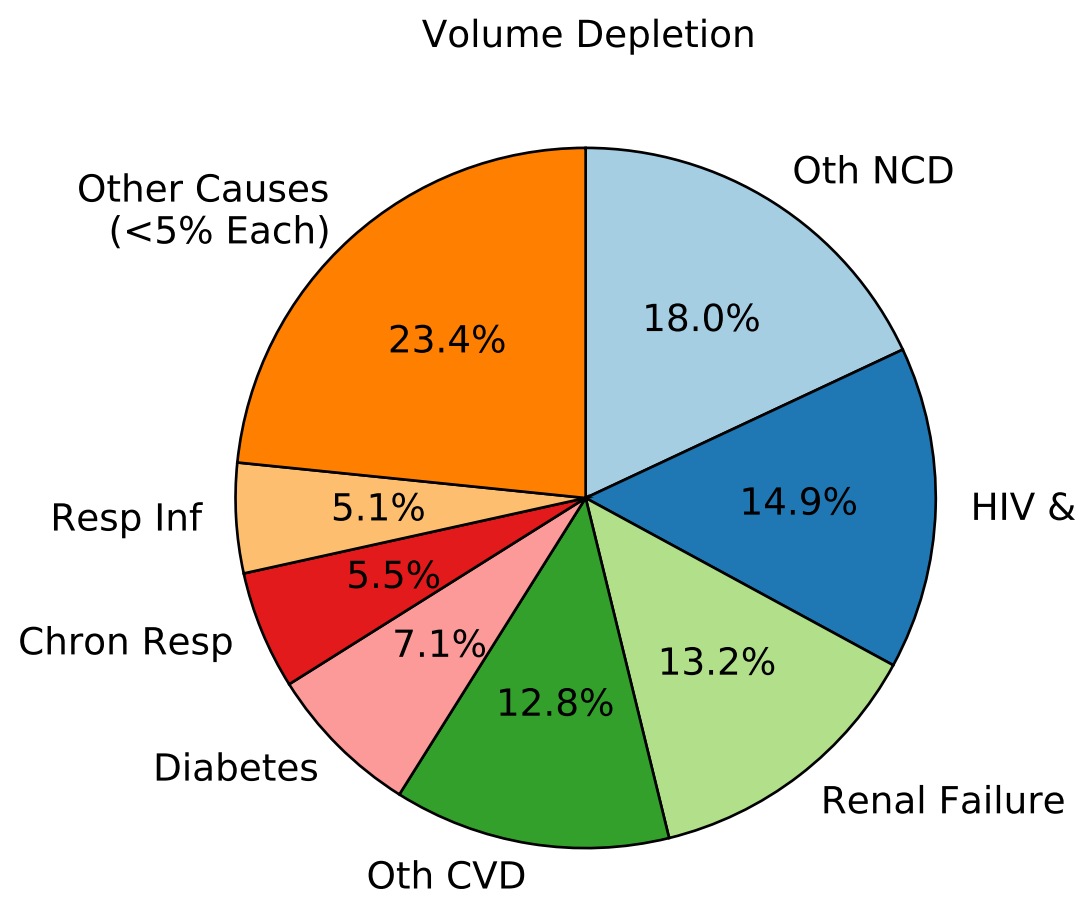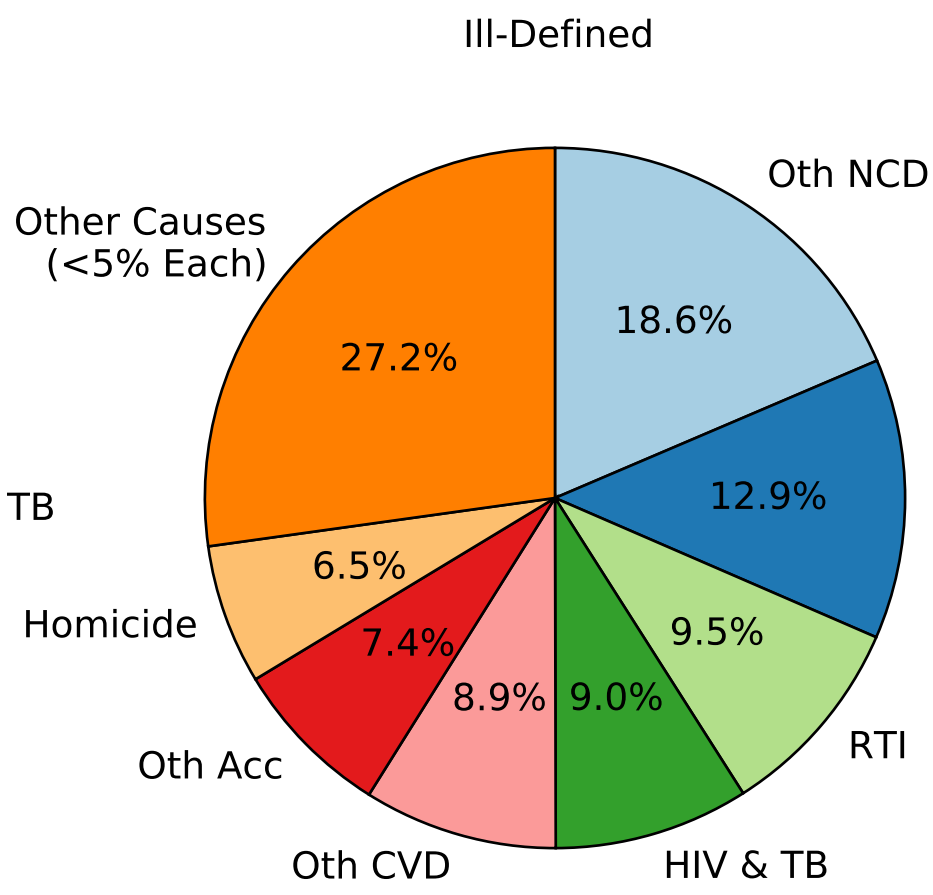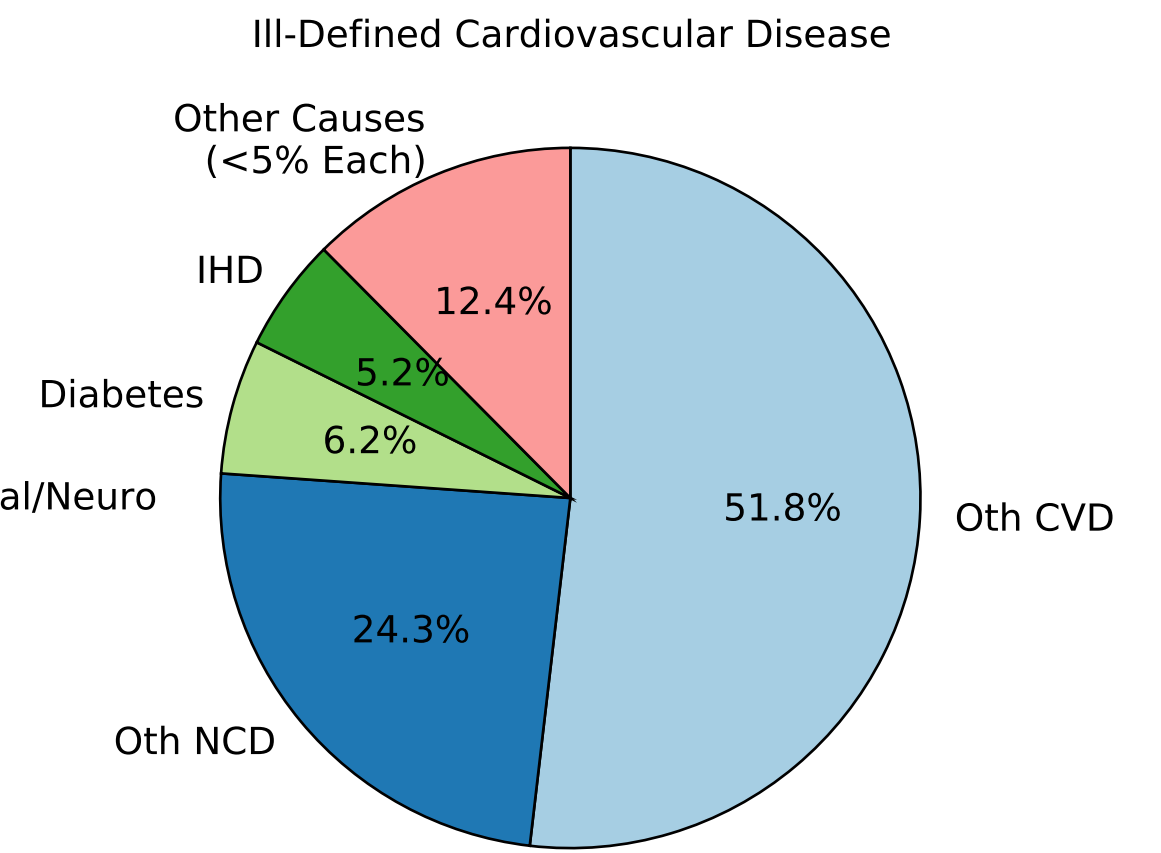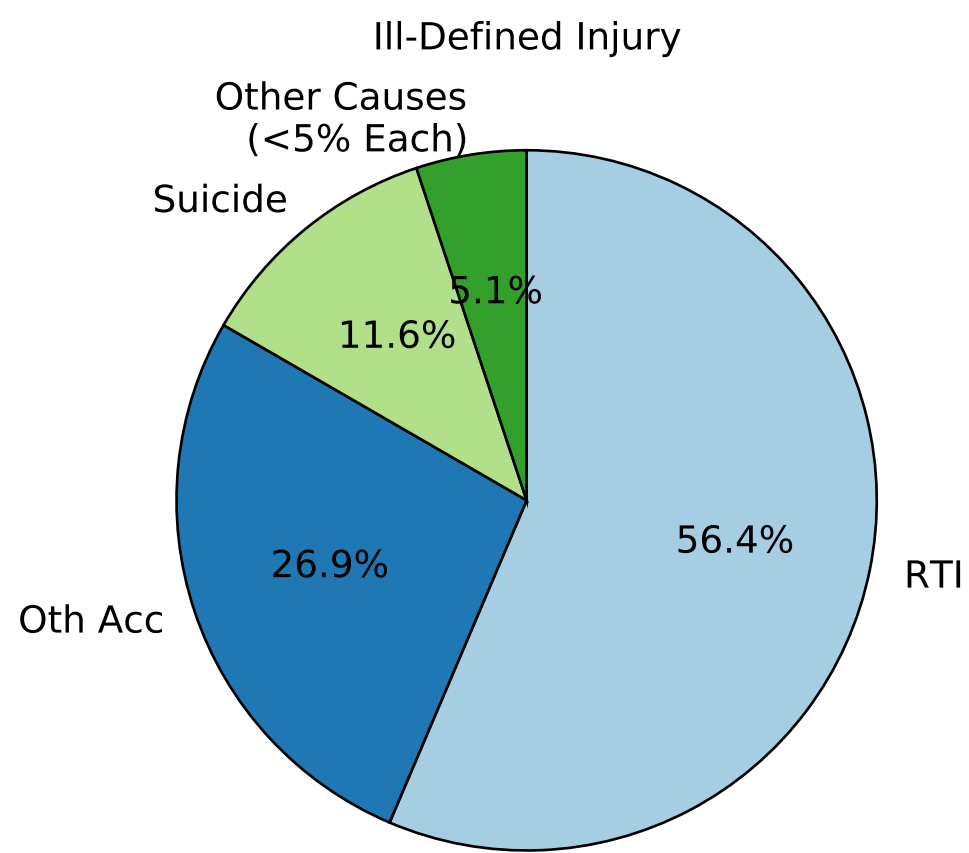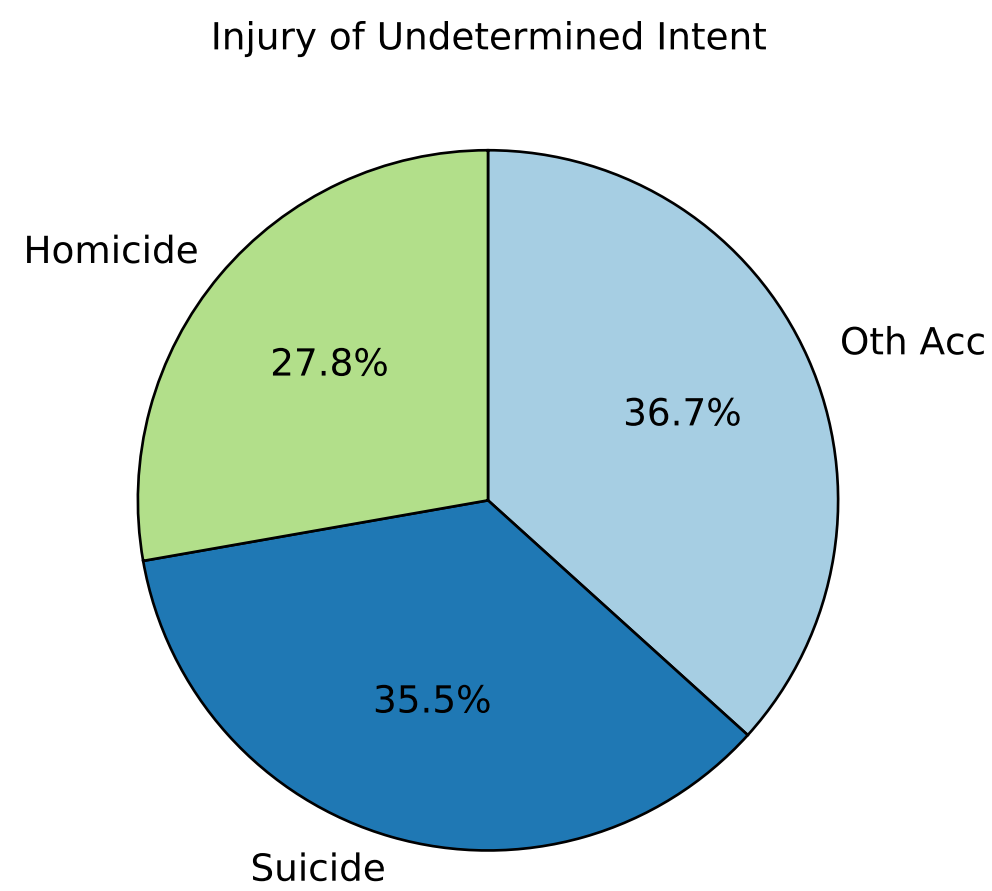

Ill-Defined Infectious Disease

ICD 9  
Female, Age 30

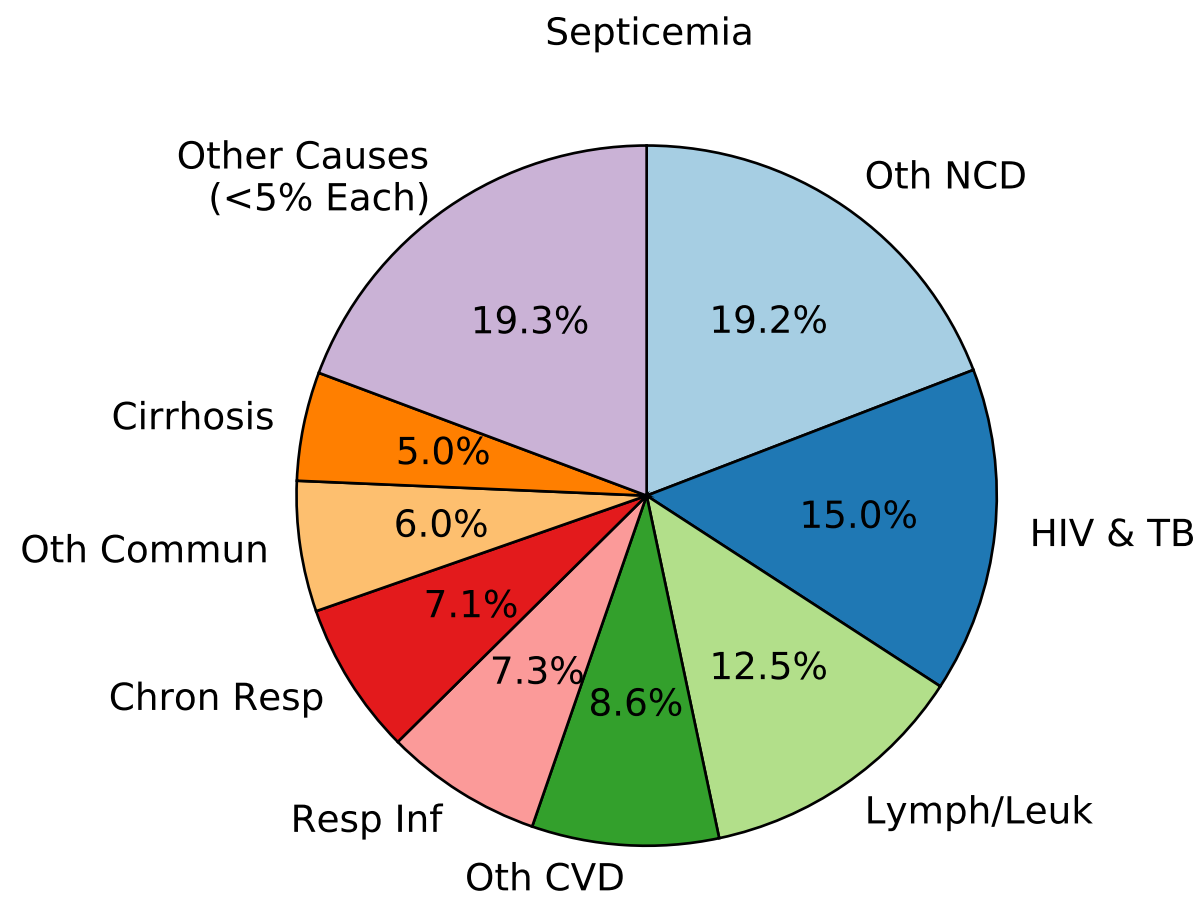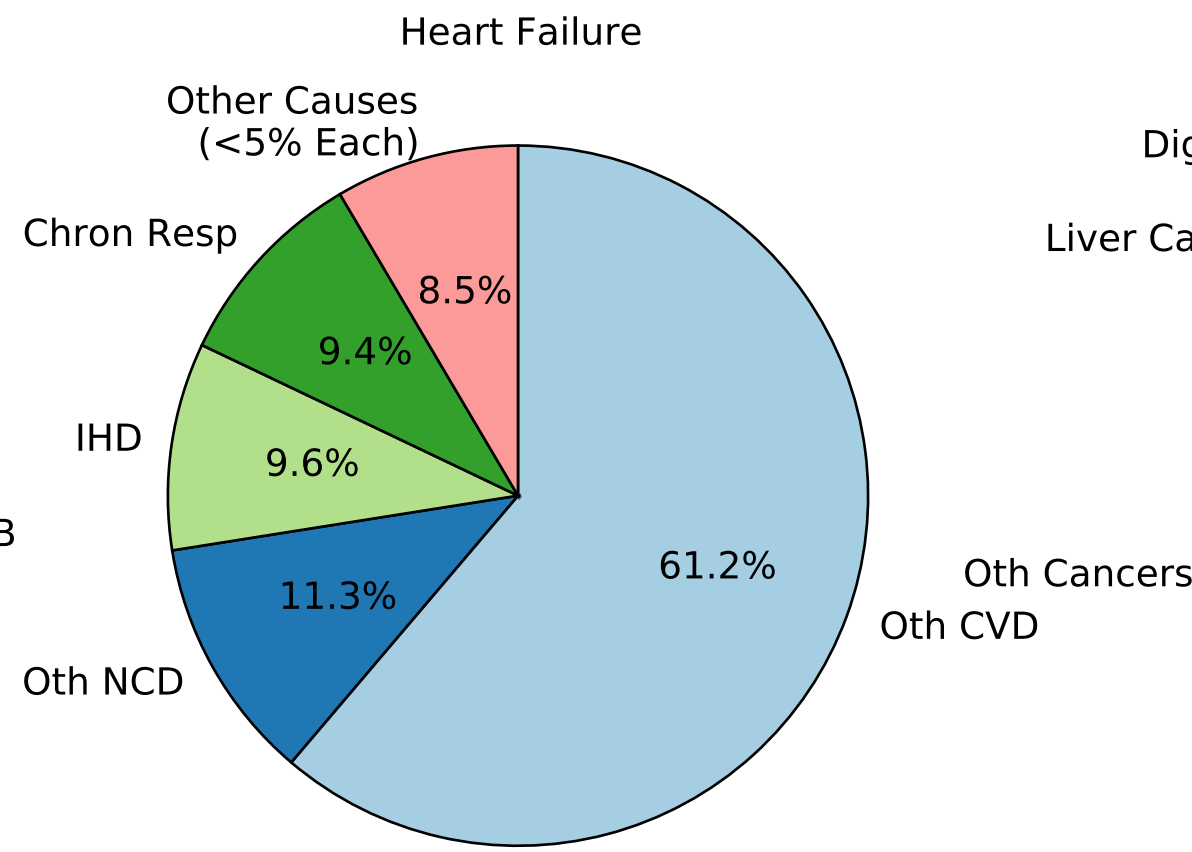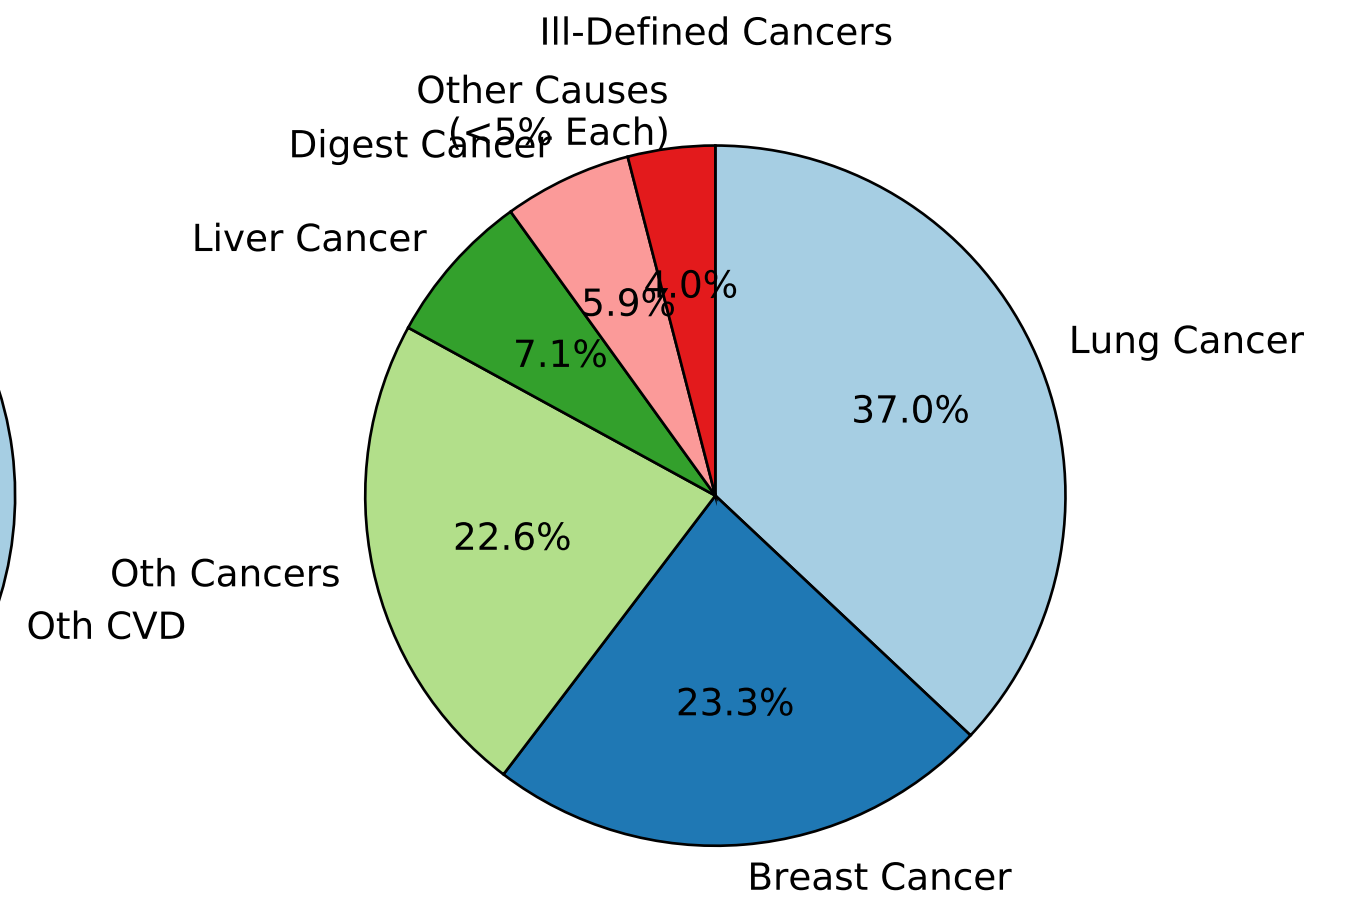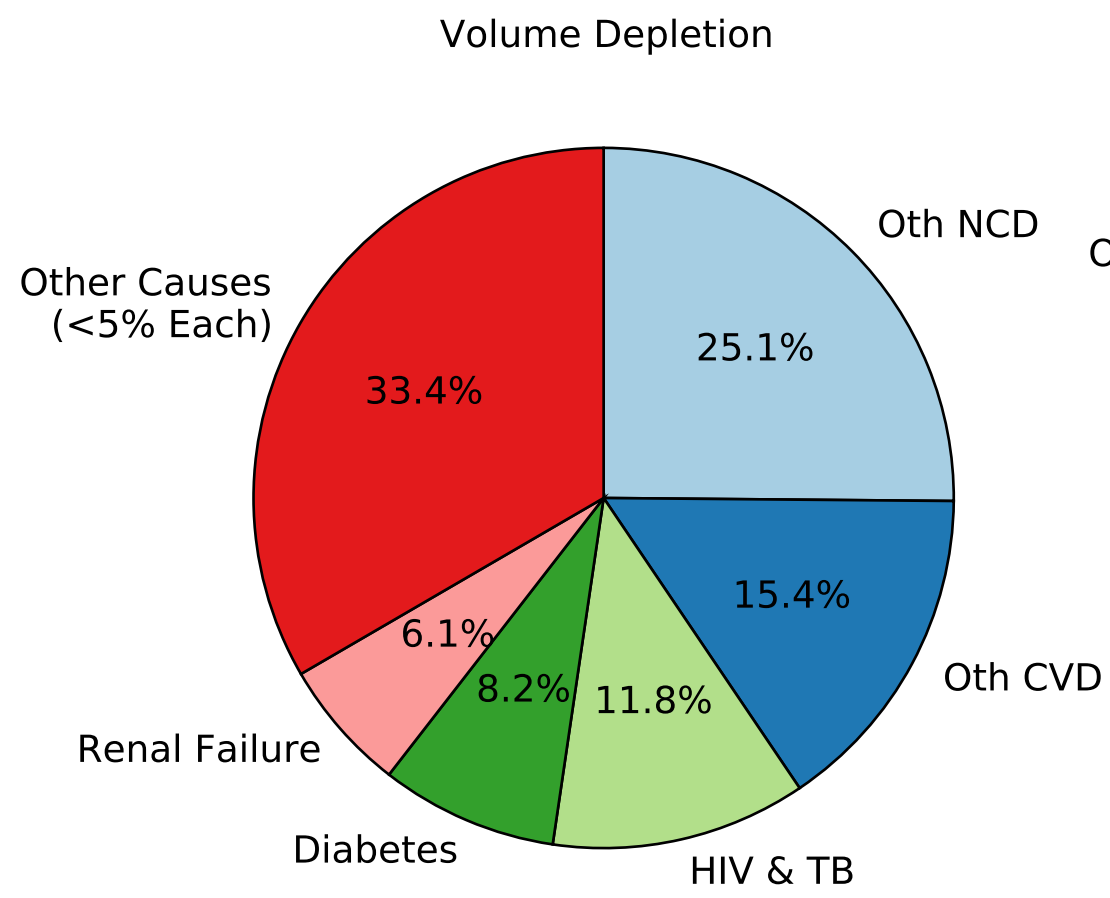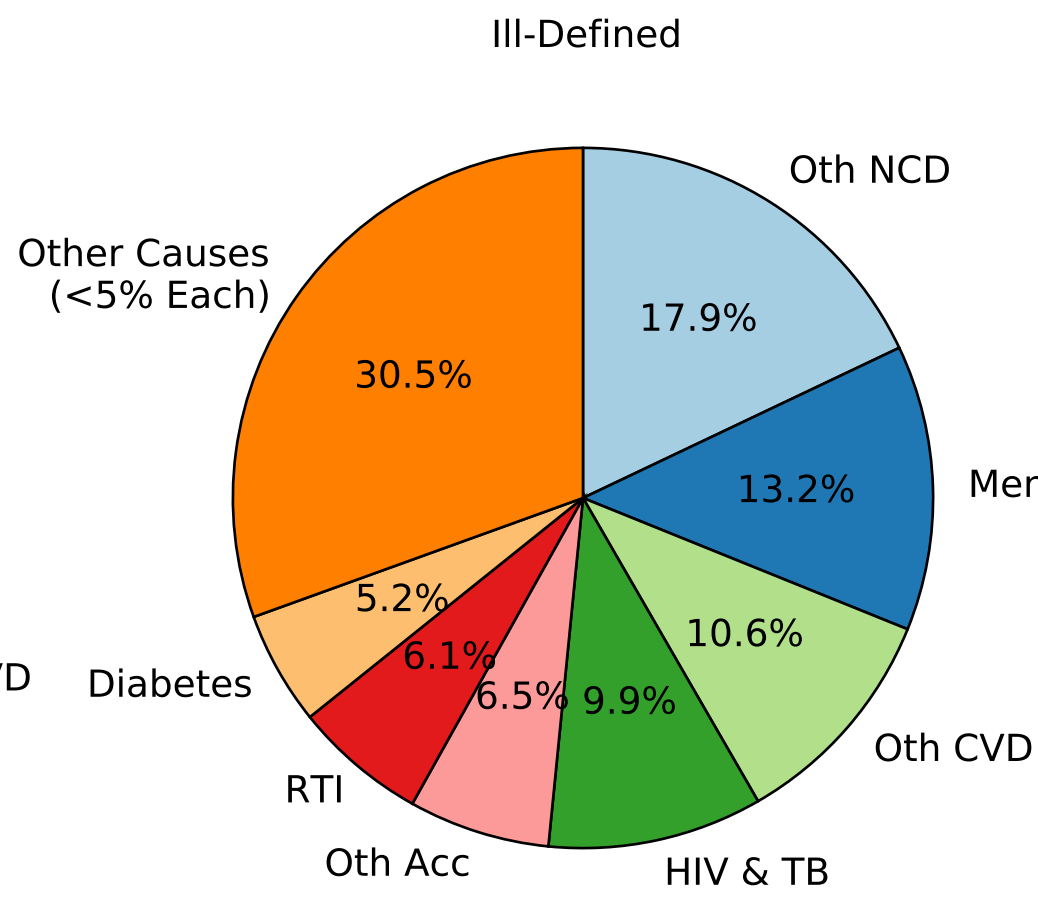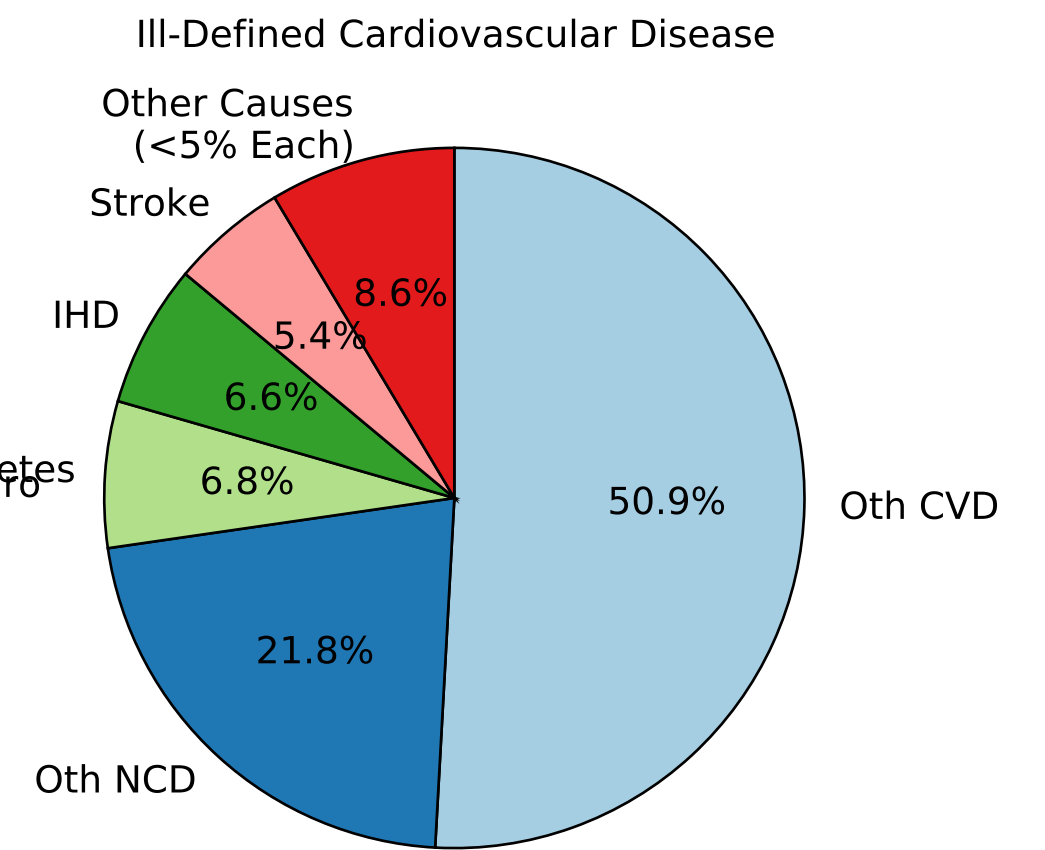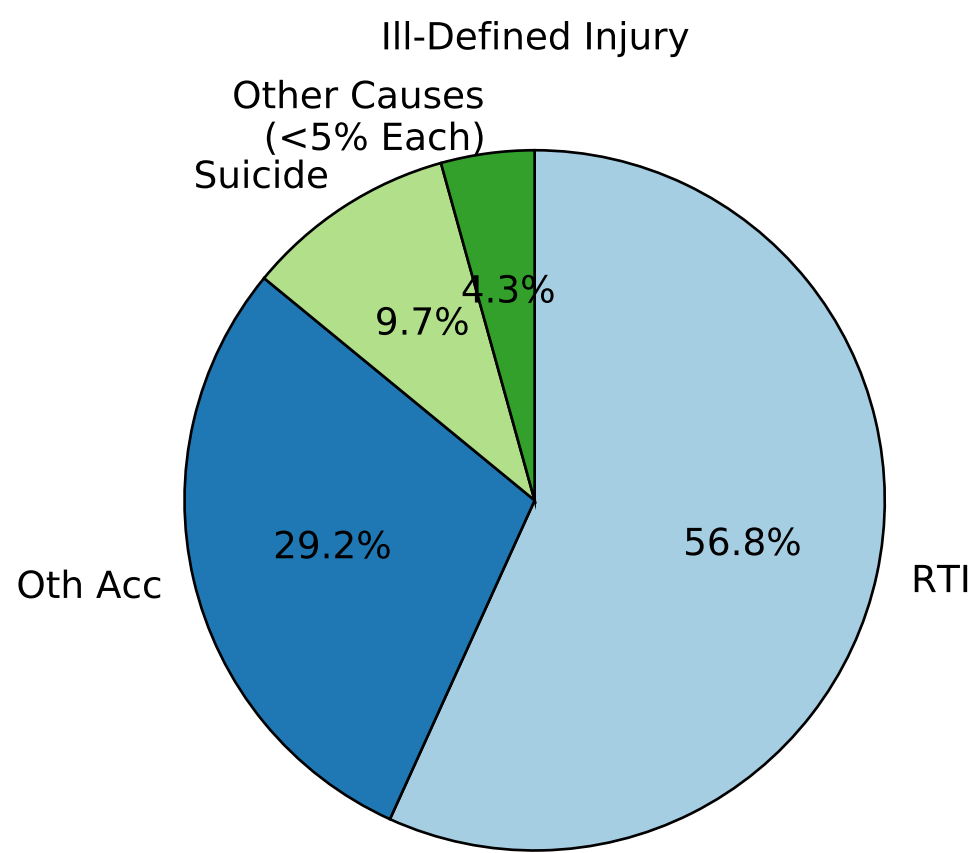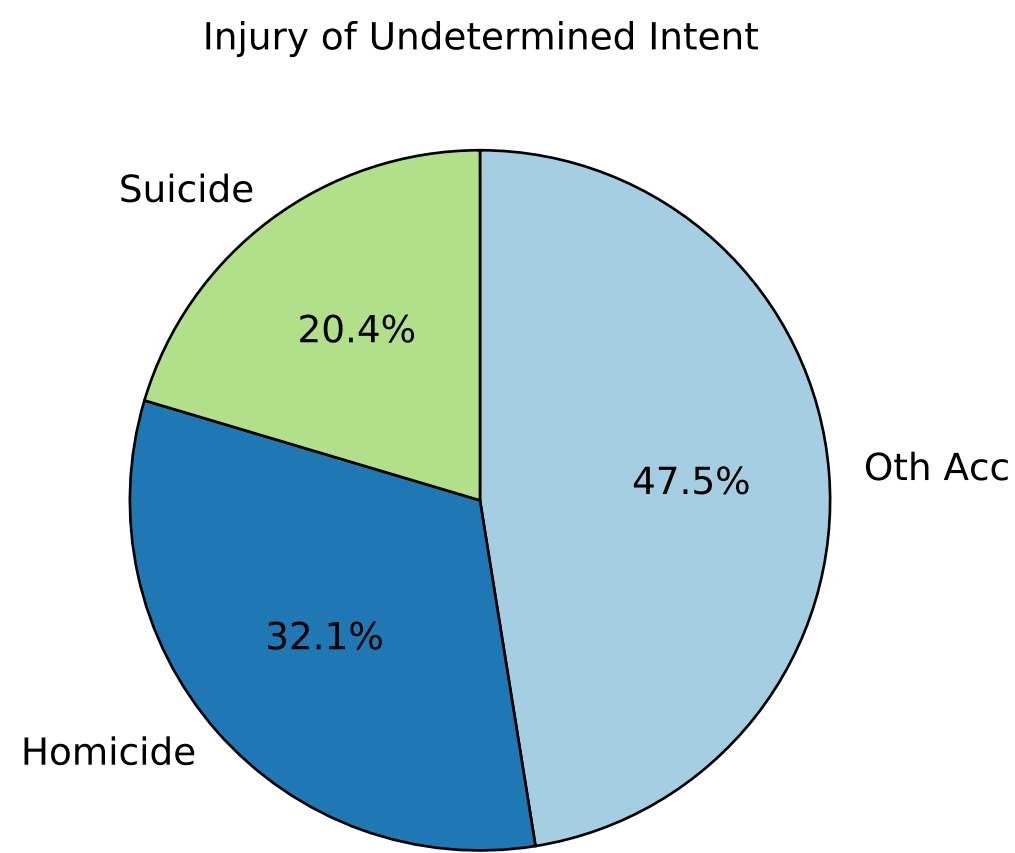

III-Defined Infectious Disease

ICD 9  
Female, Age 35

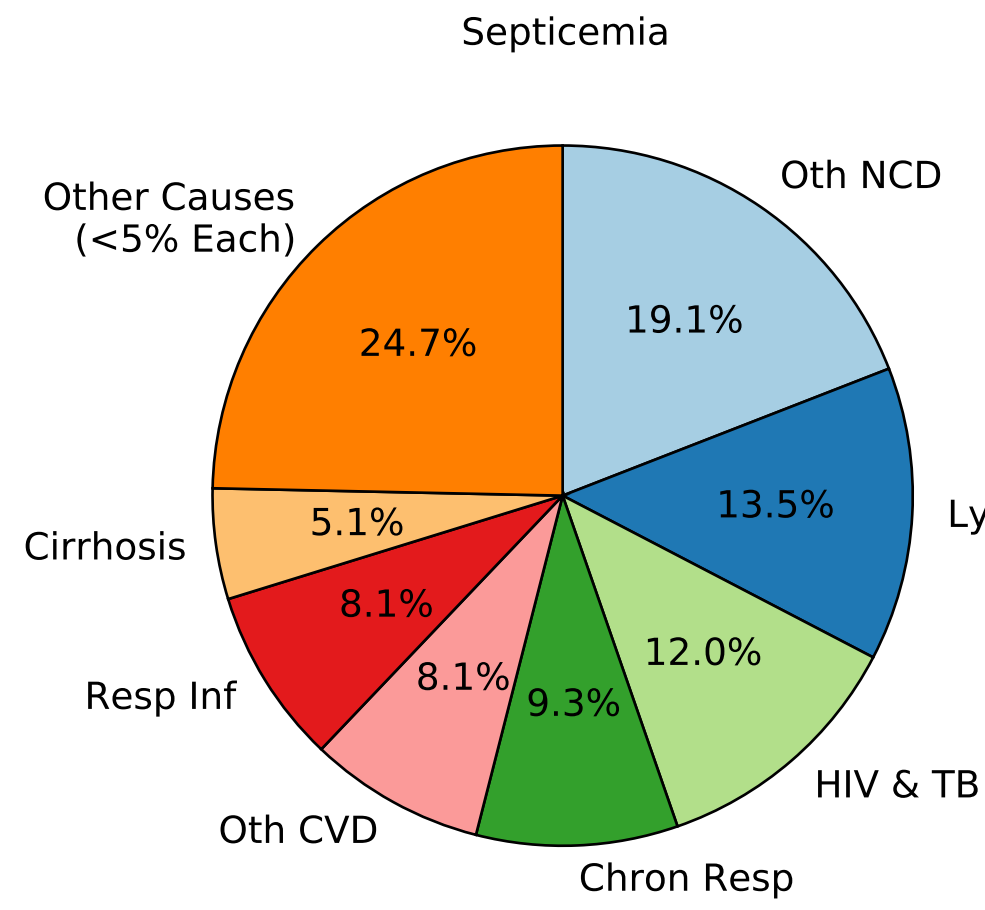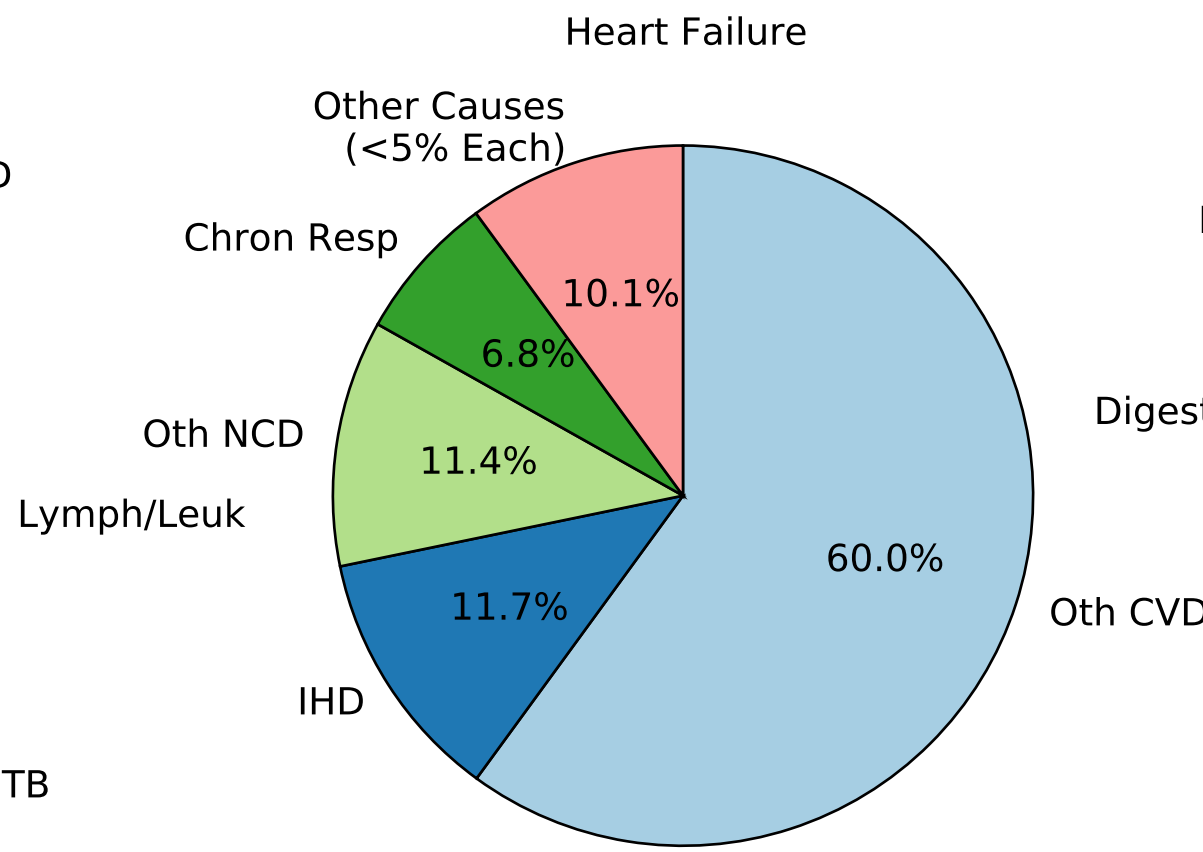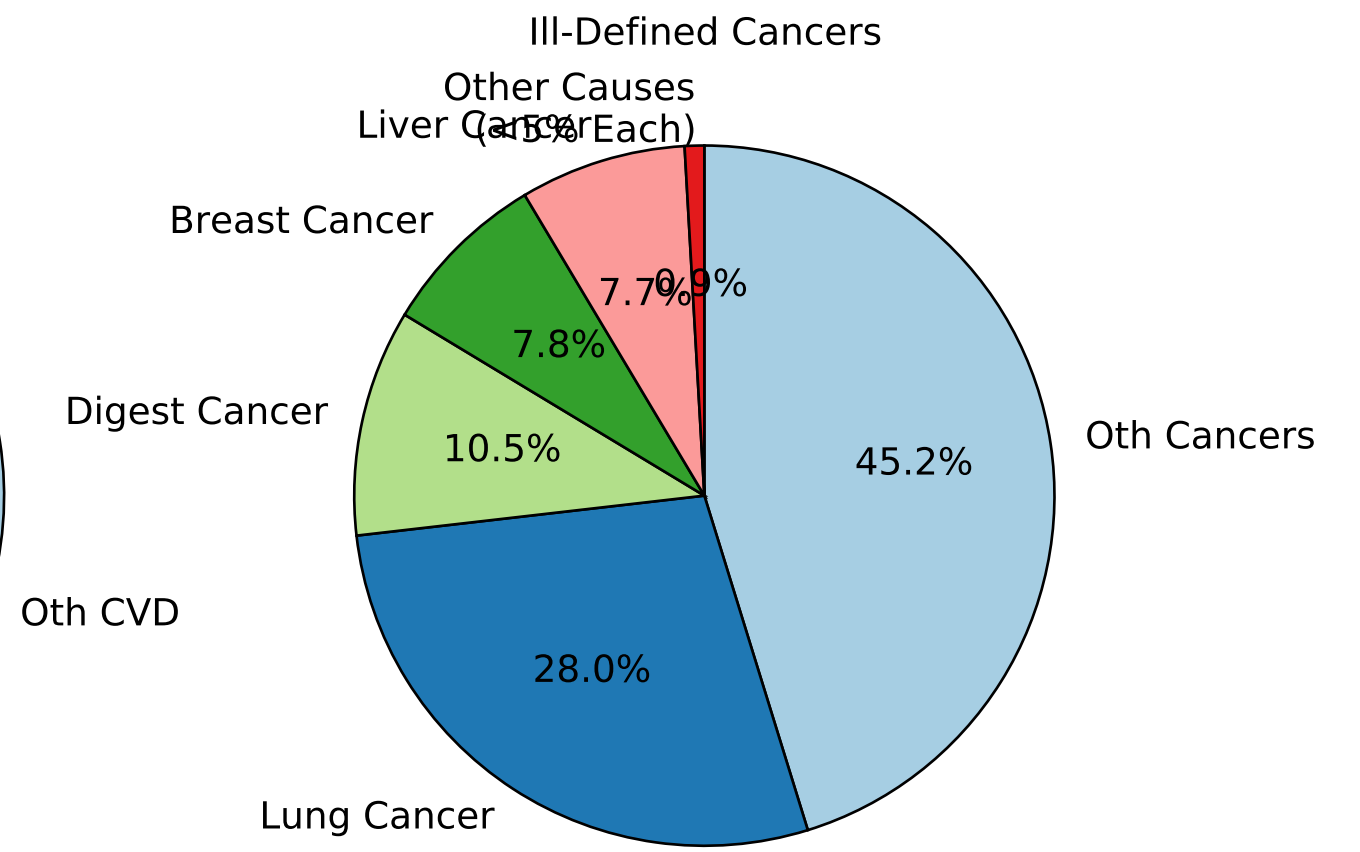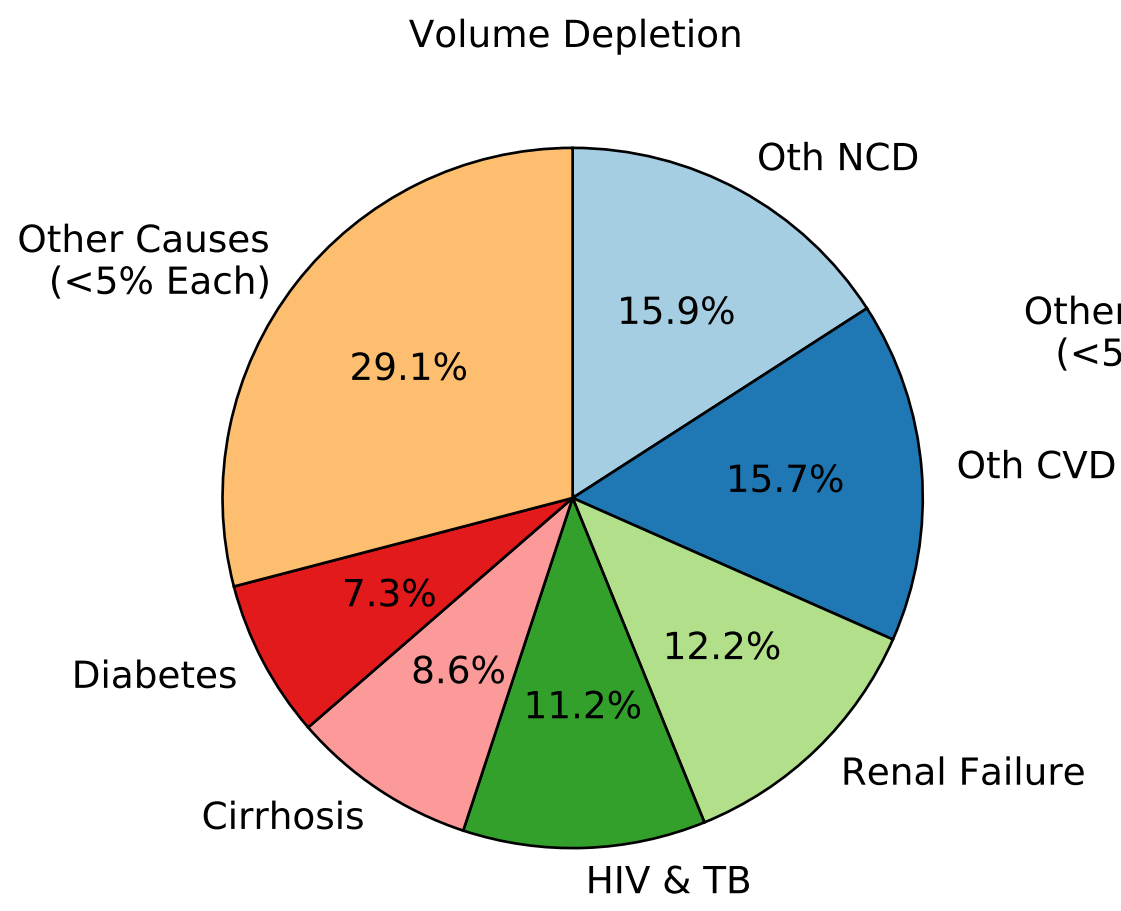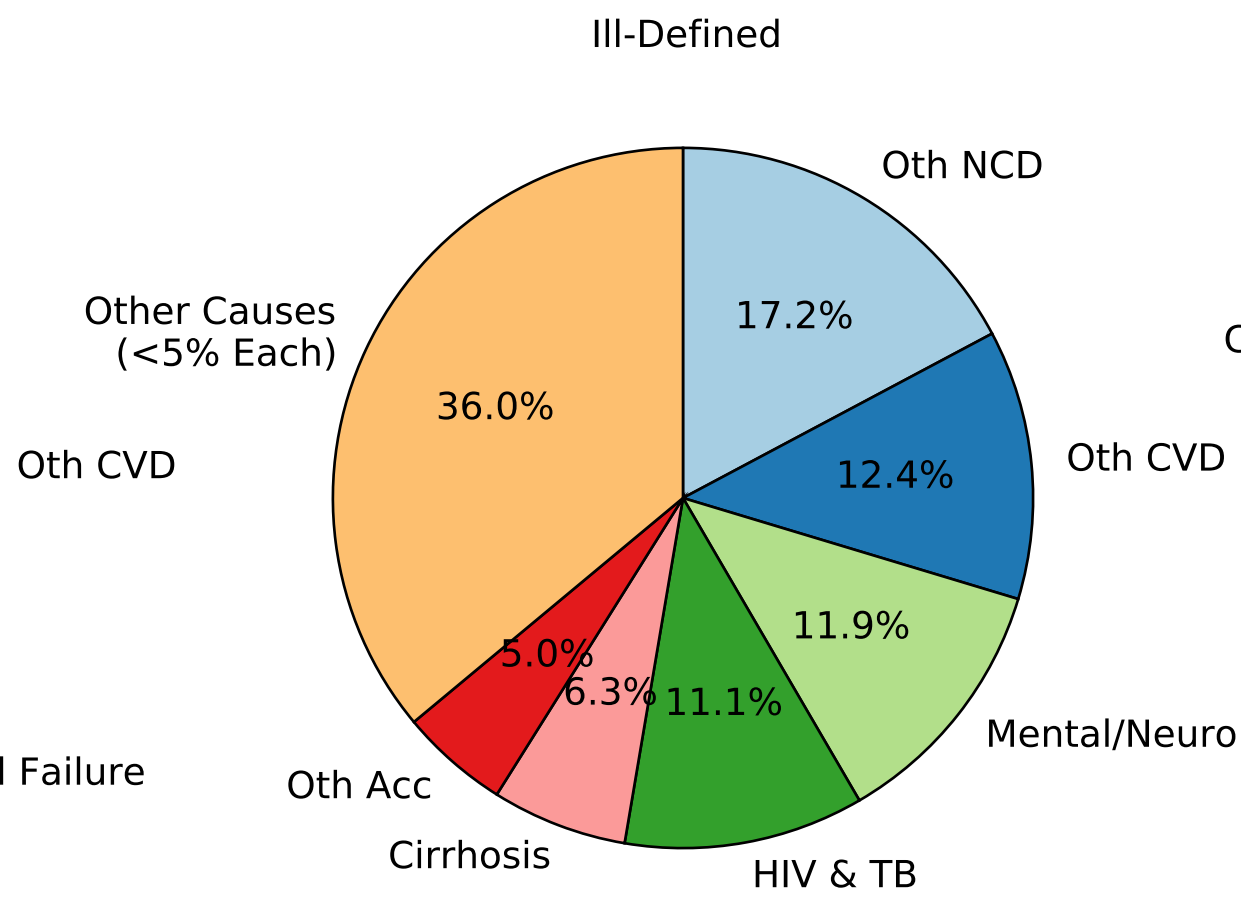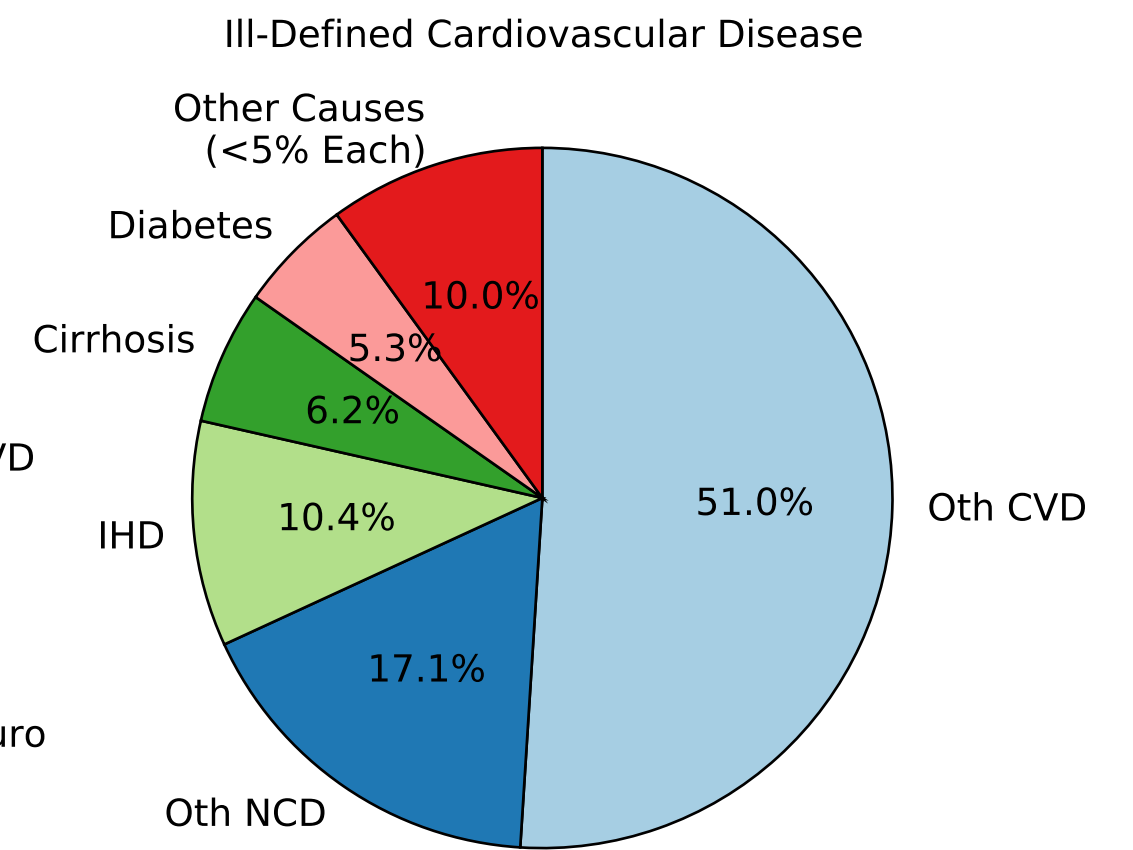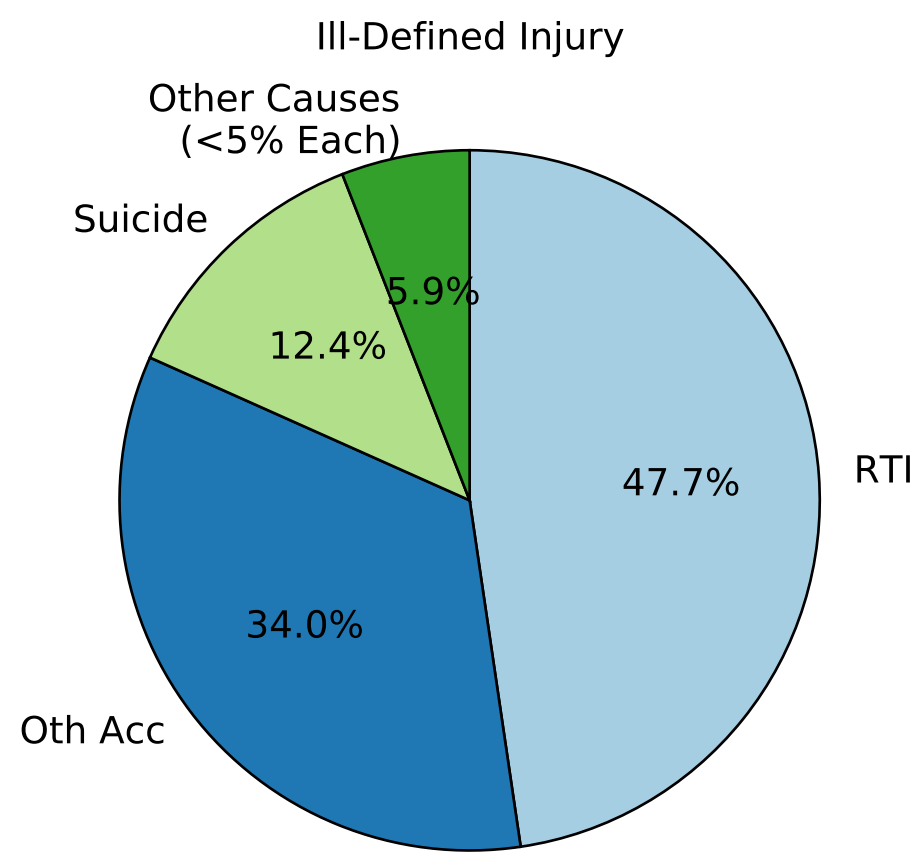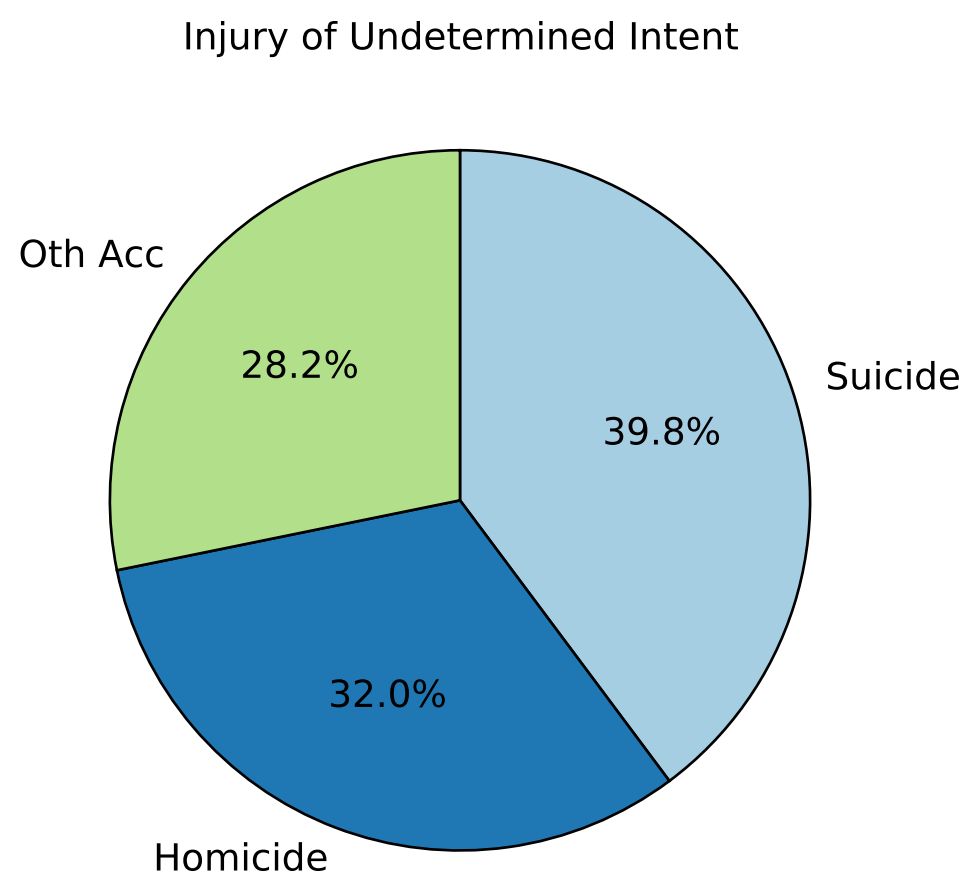

Ill-Defined Infectious Disease



ICD 9  
Female, Age 40

Septicemia

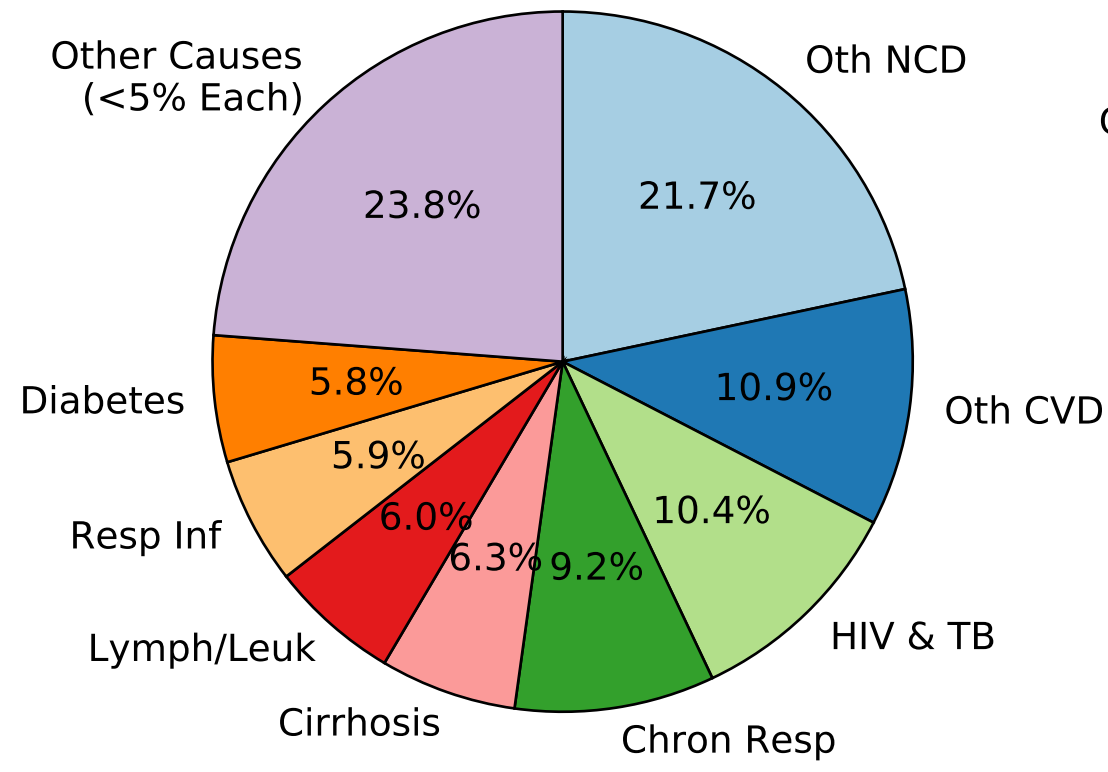

Heart Failure

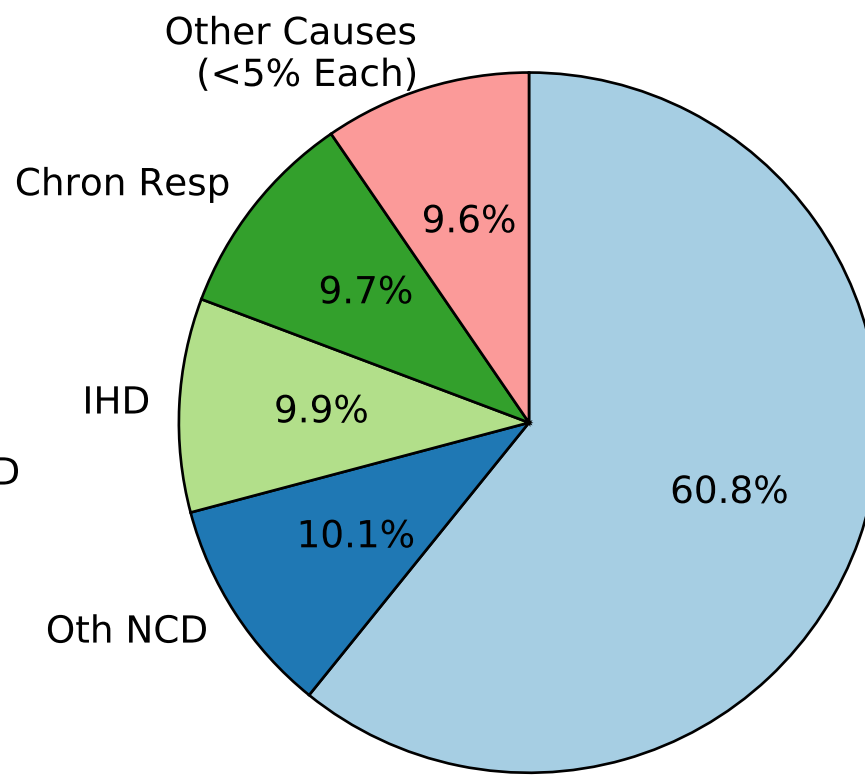

Ill-Defined Cancers

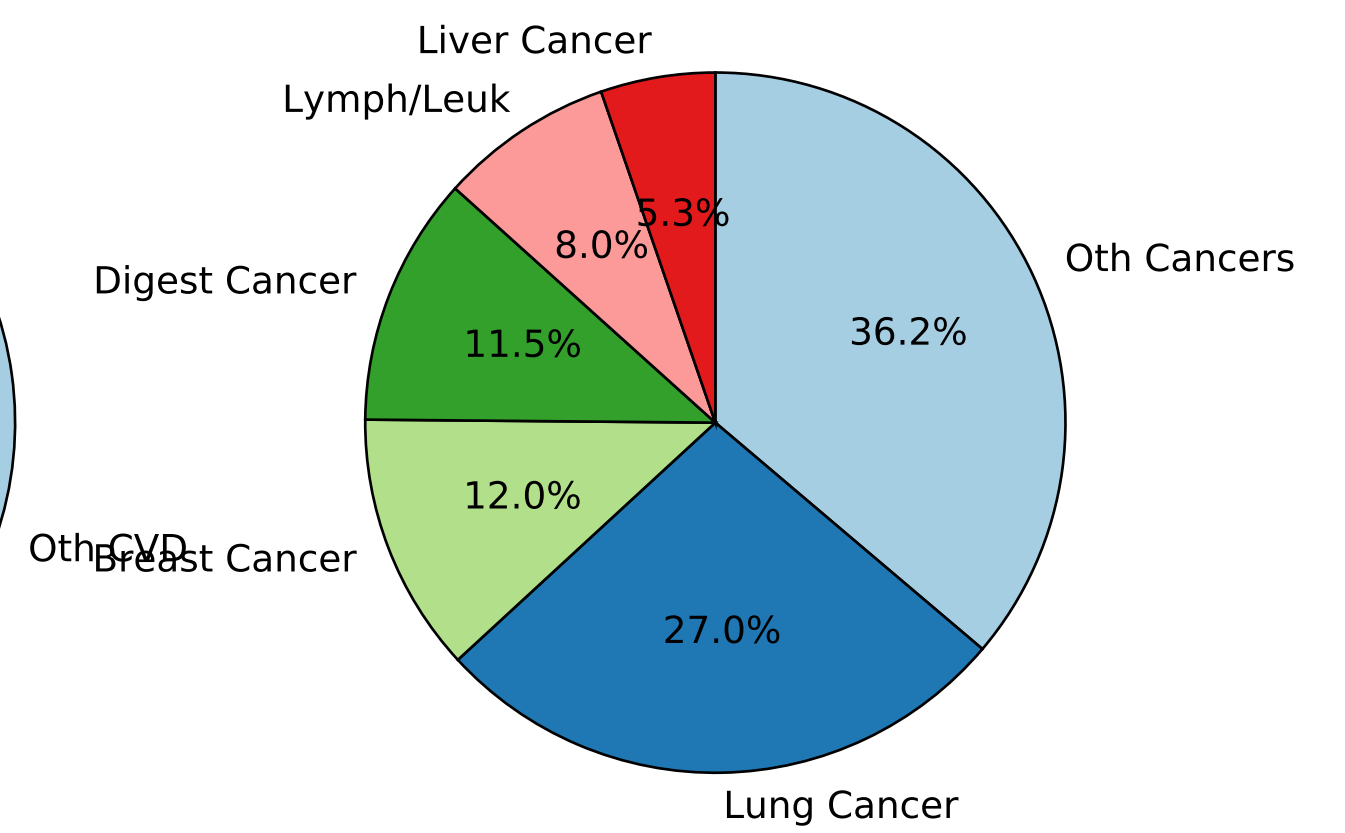

Volume Depletion

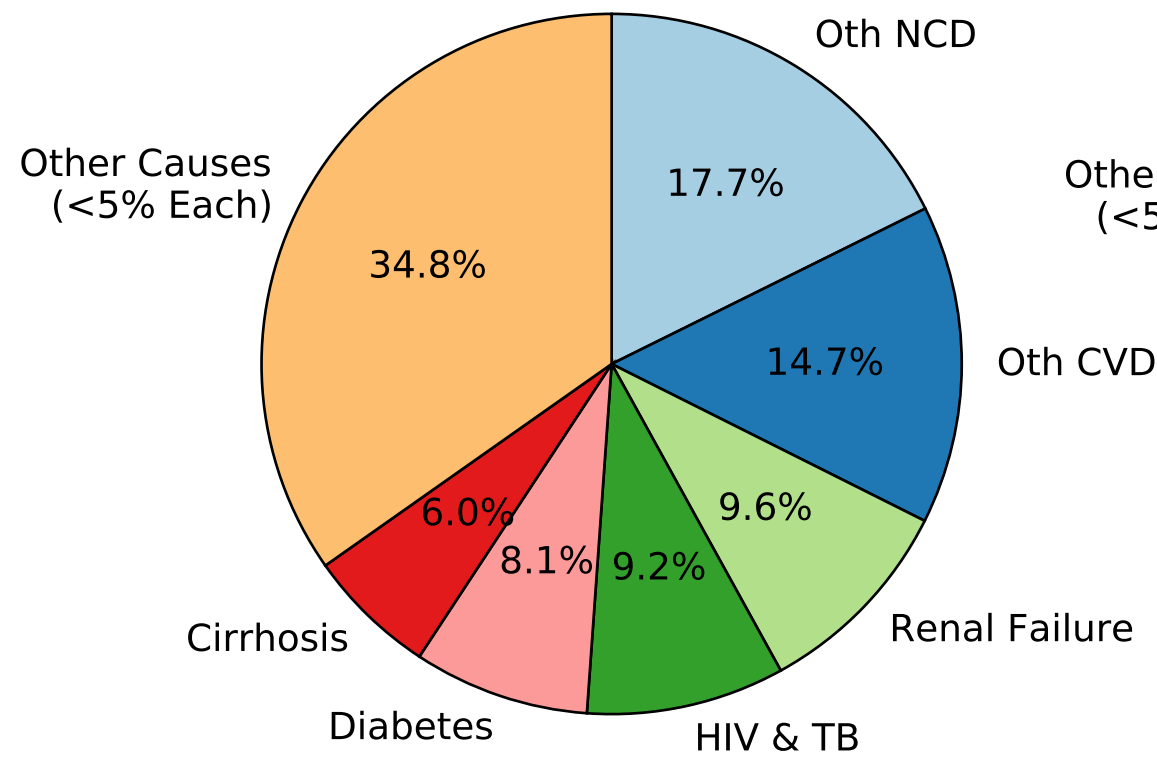

Ill-Defined

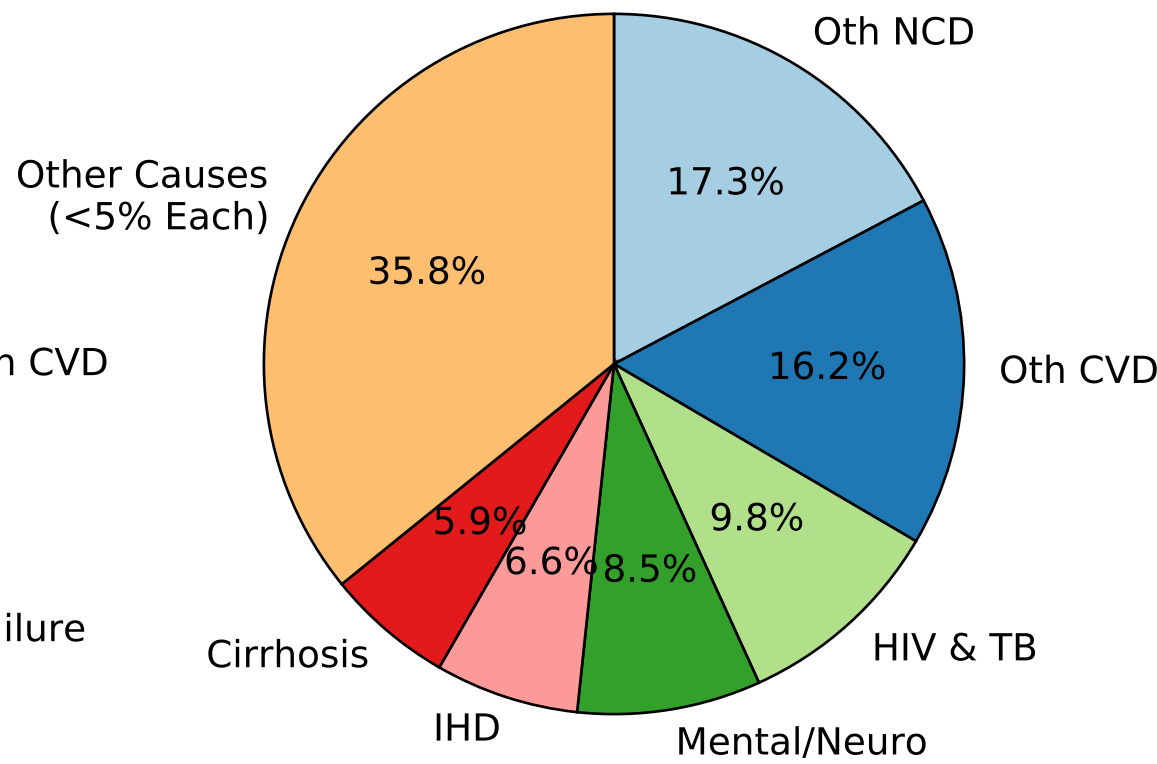

Ill-Defined Cardiovascular Disease

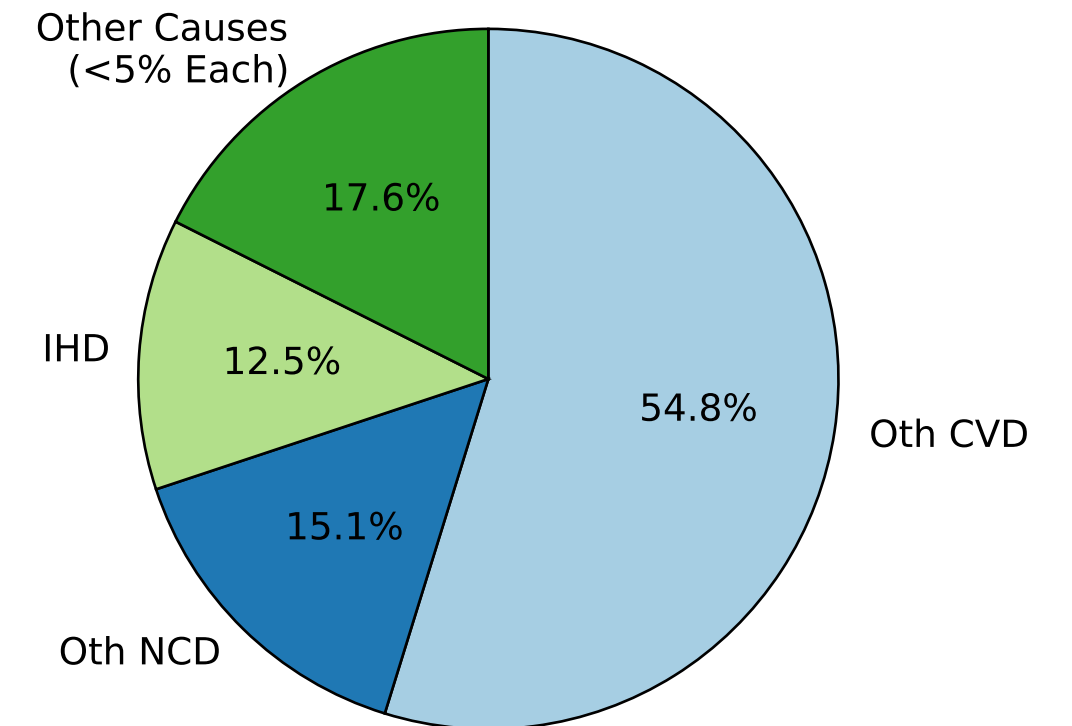

Ill-Defined Injury

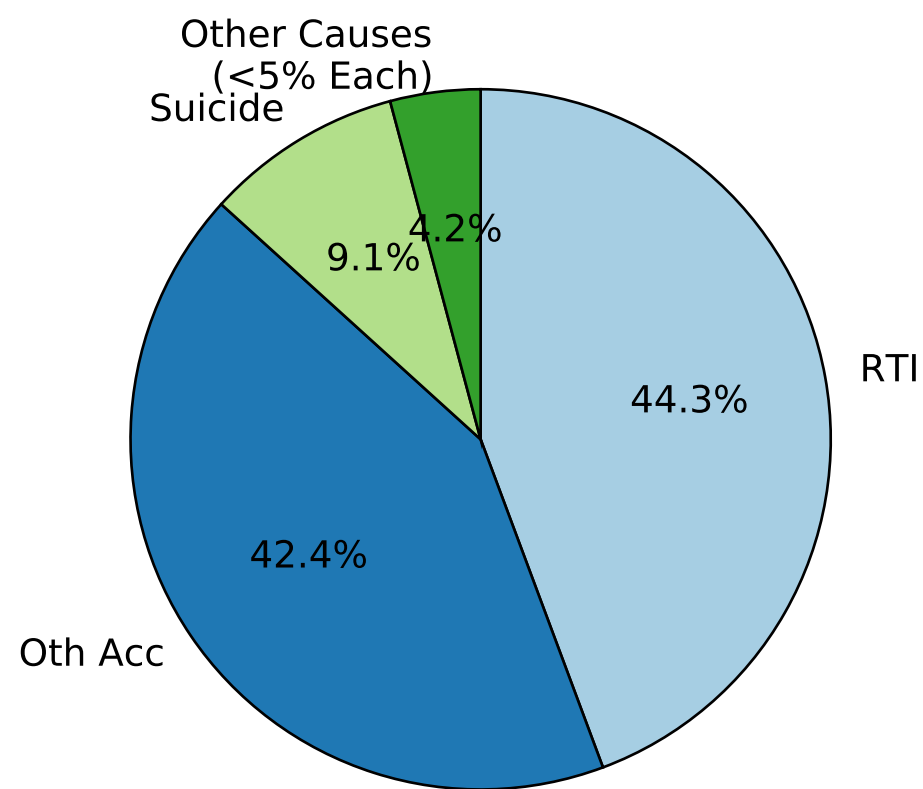

Injury of Undetermined Intent

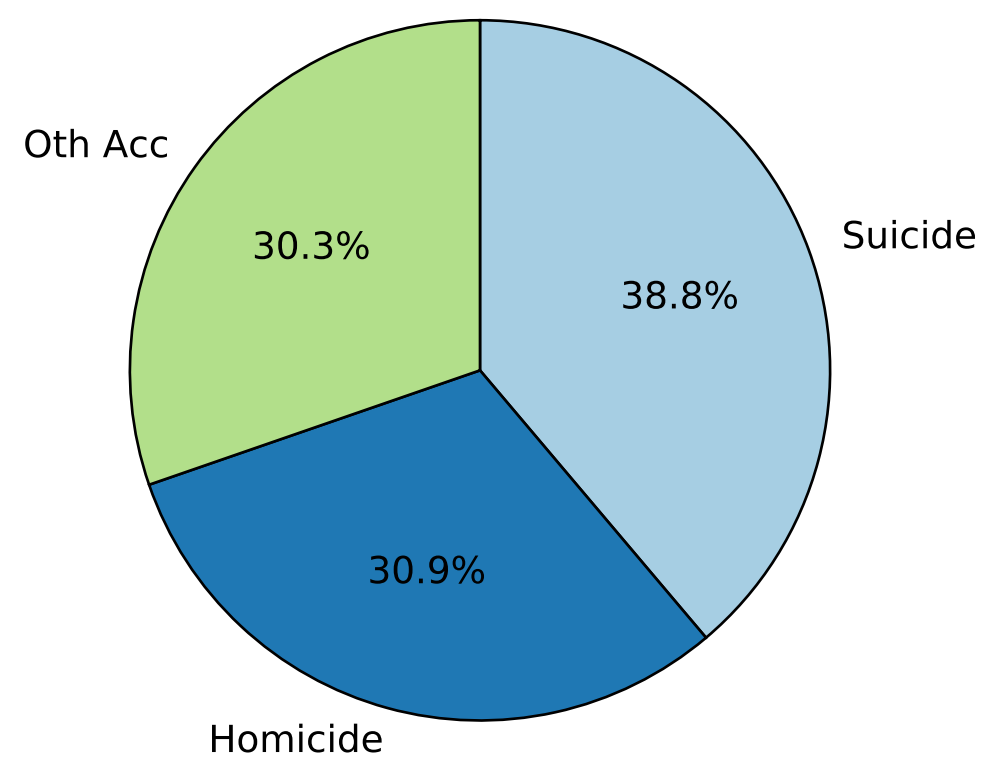

Ill-Defined Infectious Disease

ICD 9  
Female, Age 45

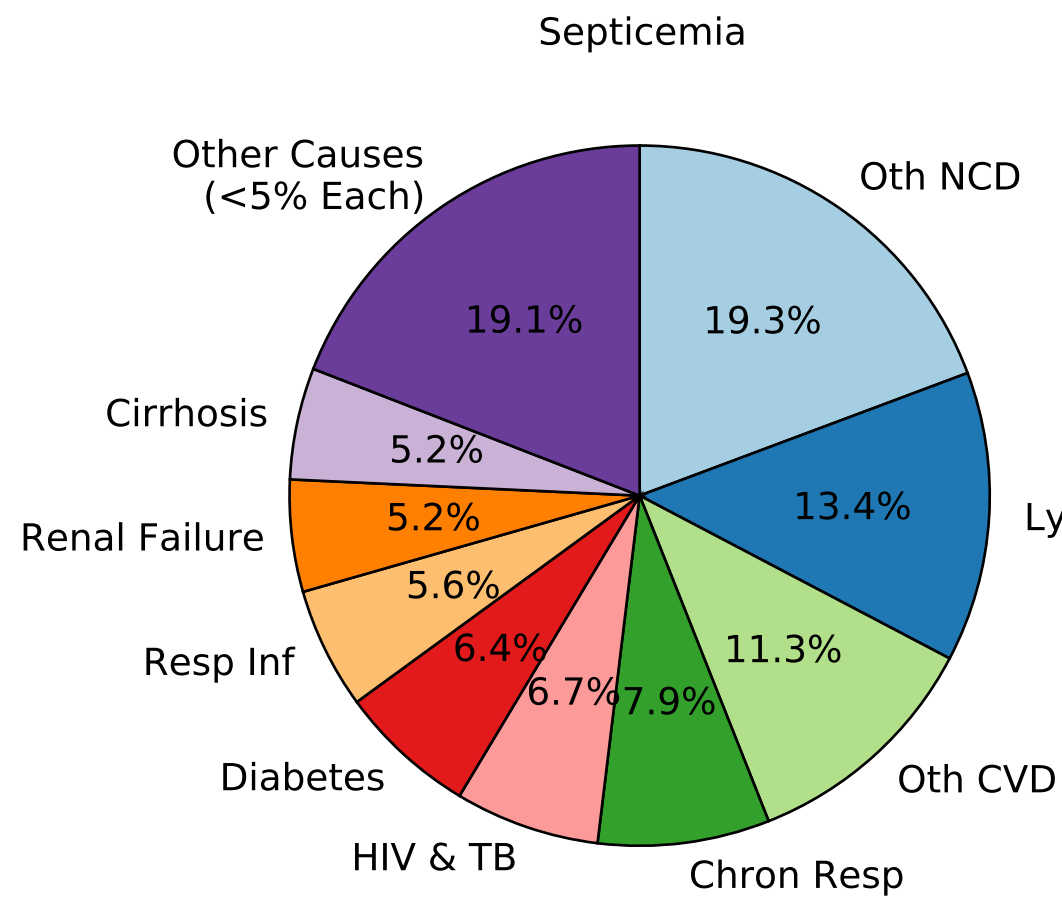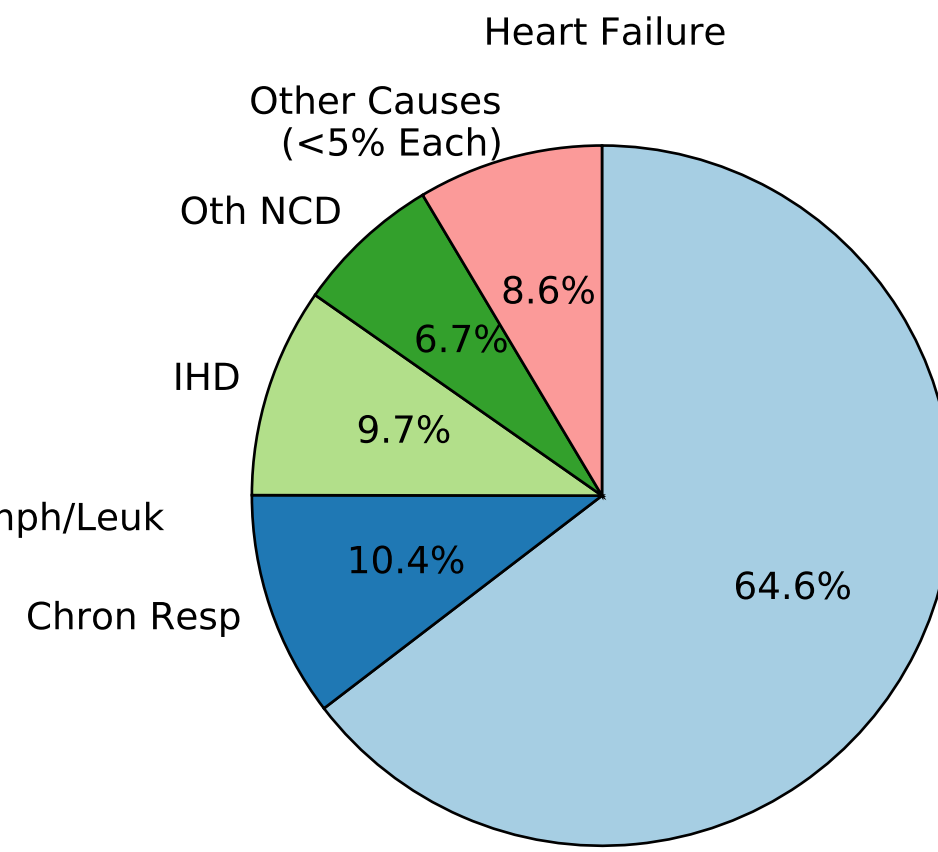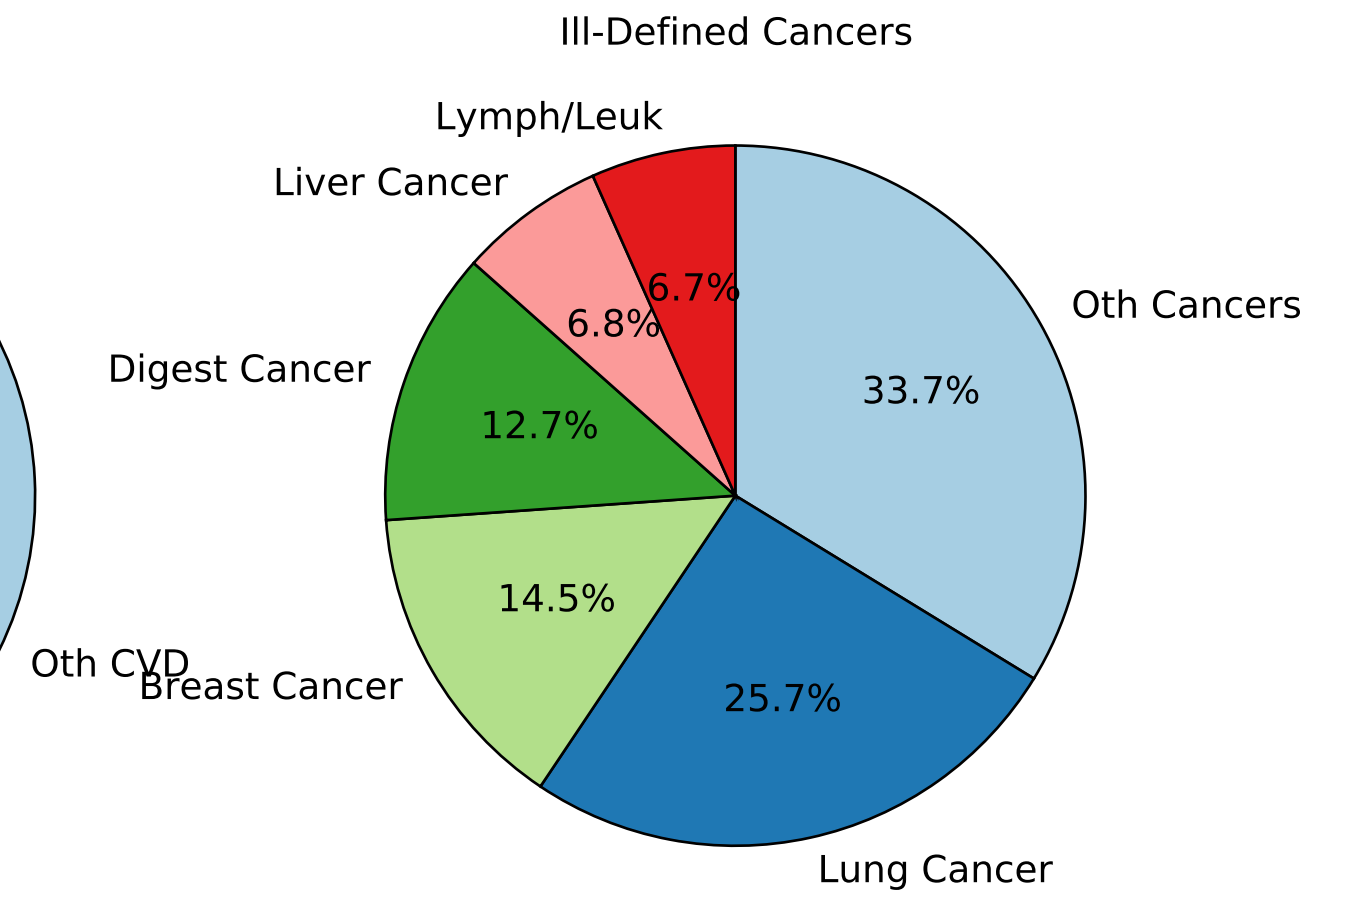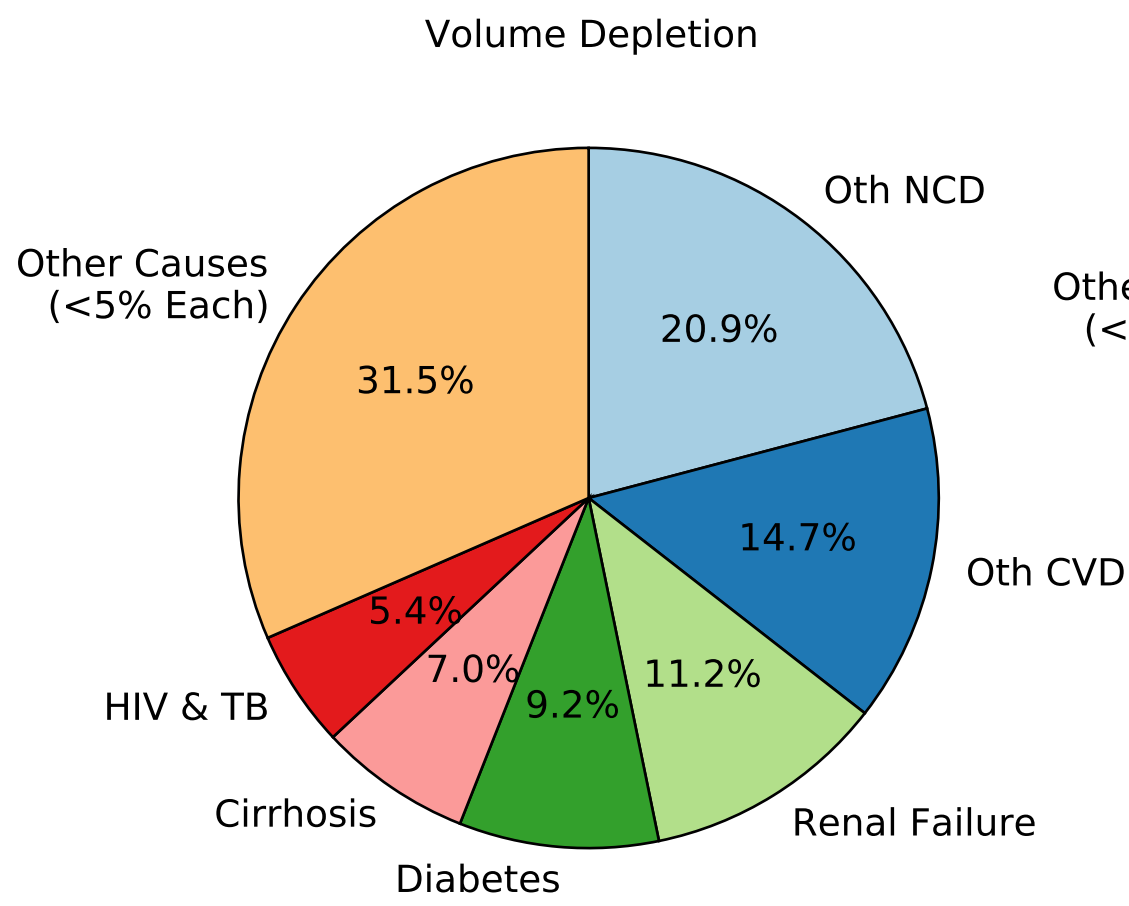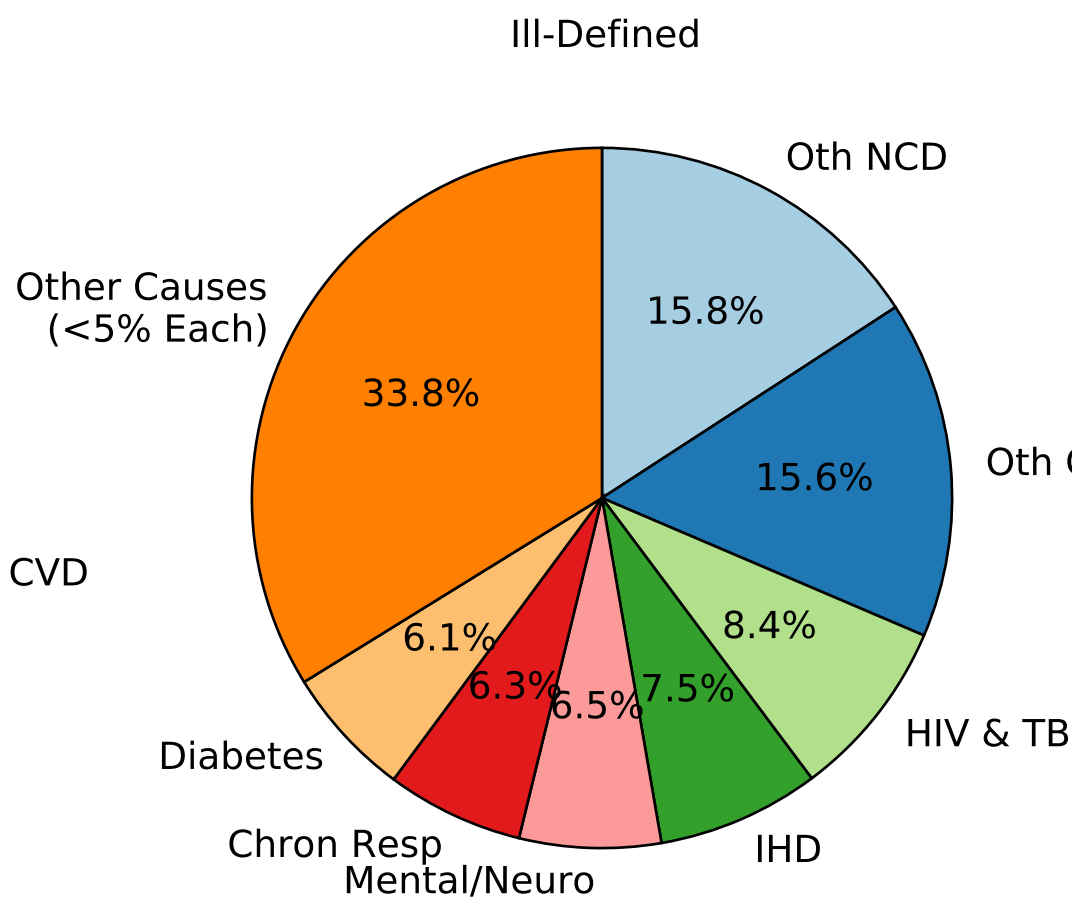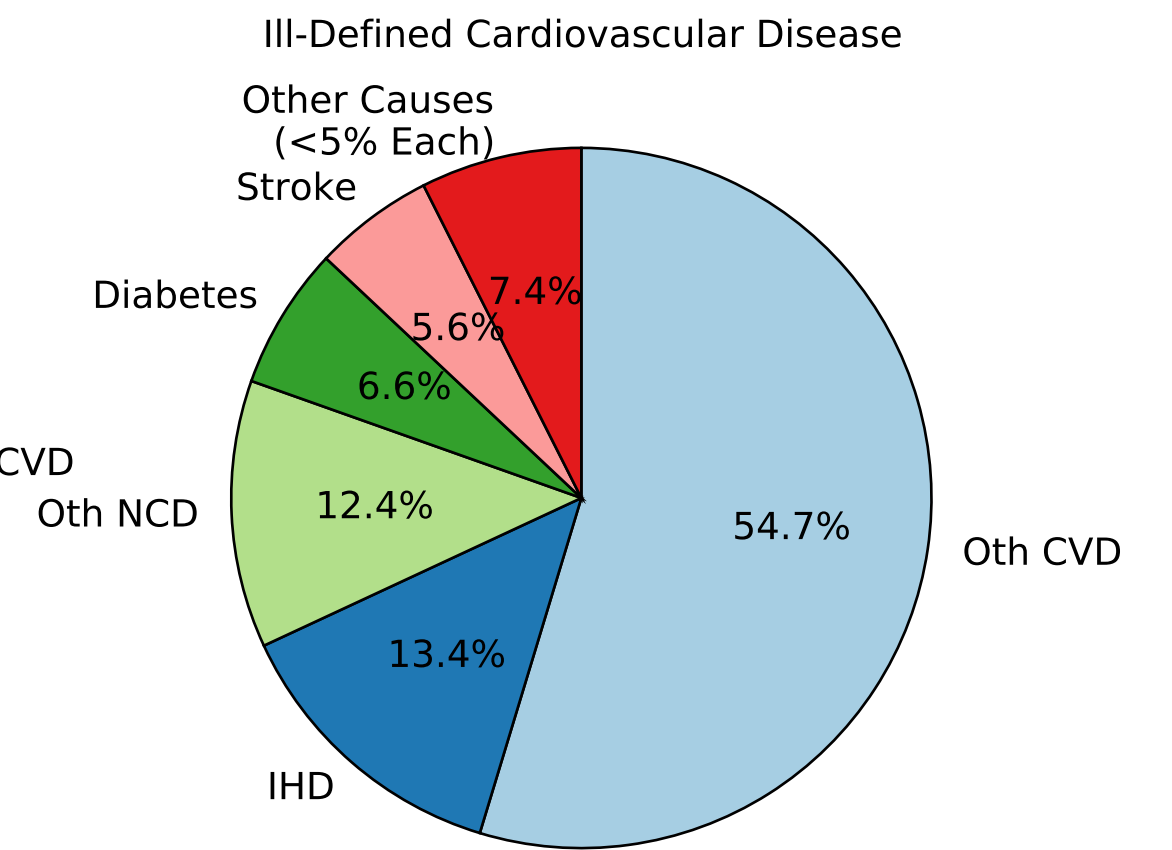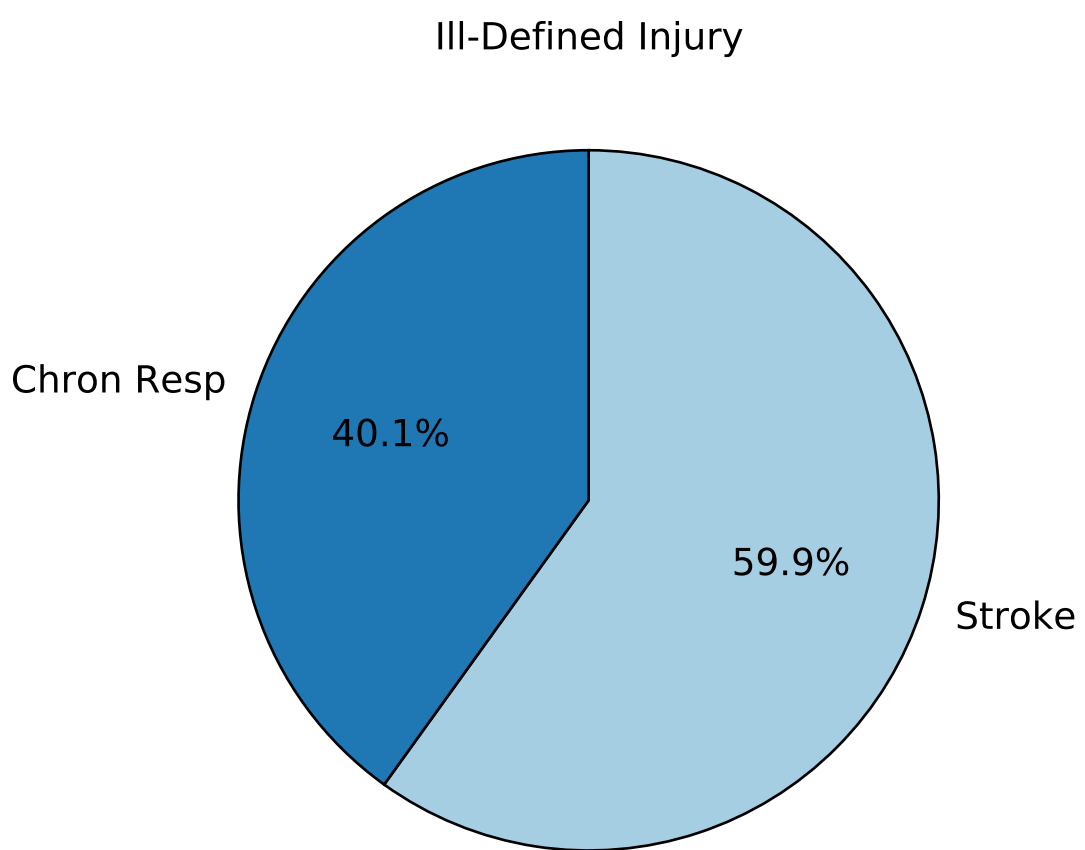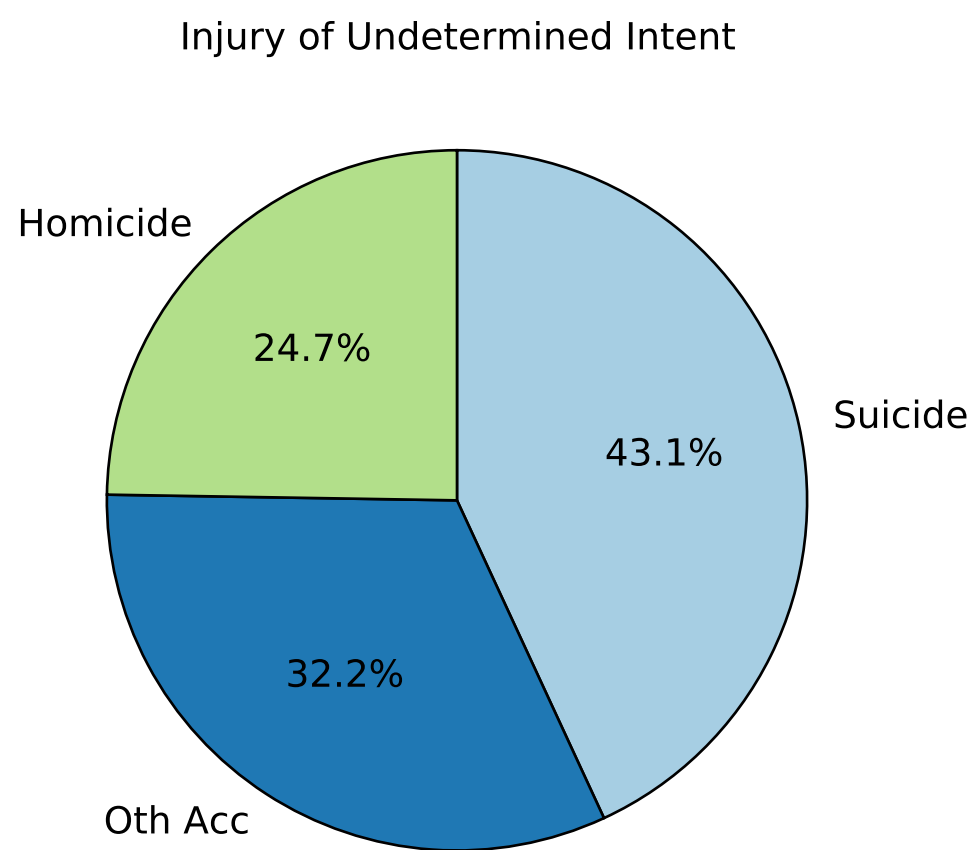

Ill-Defined Infectious Disease

ICD 9  
Female, Age 50

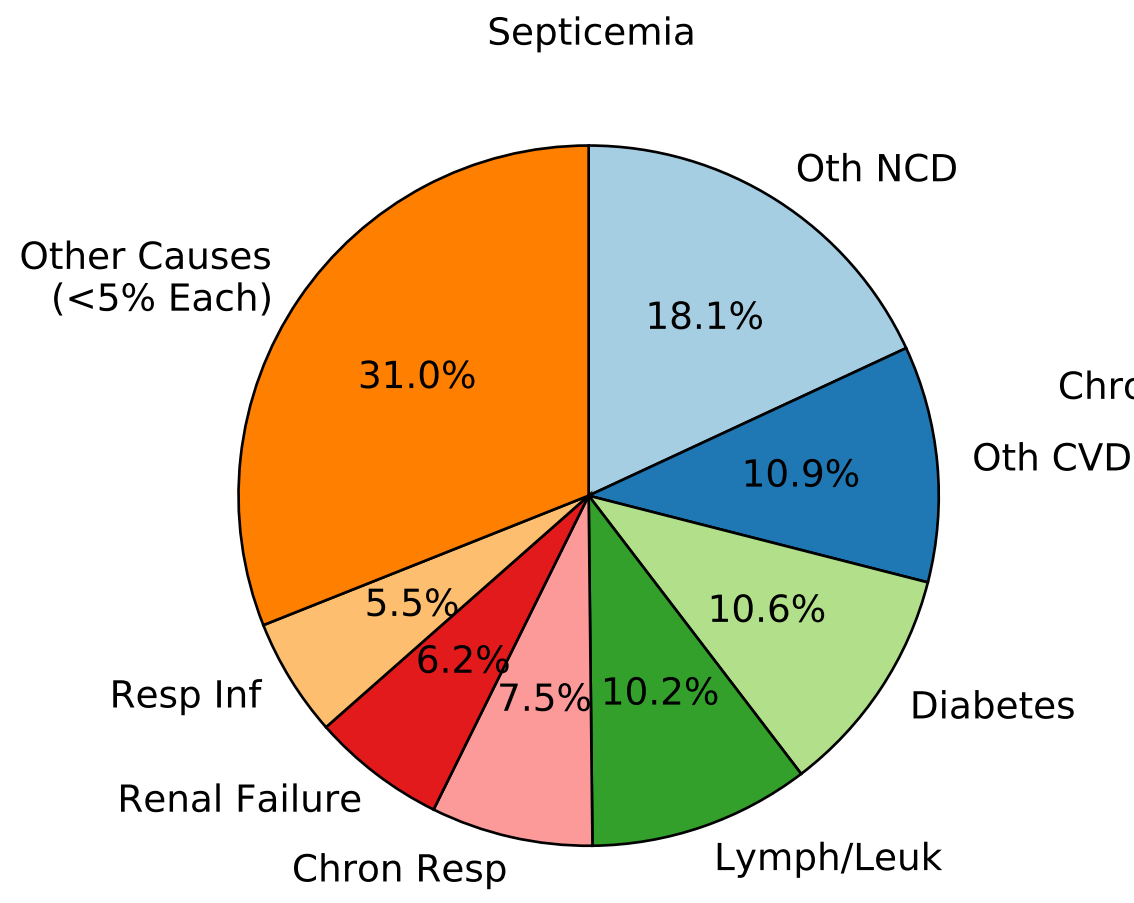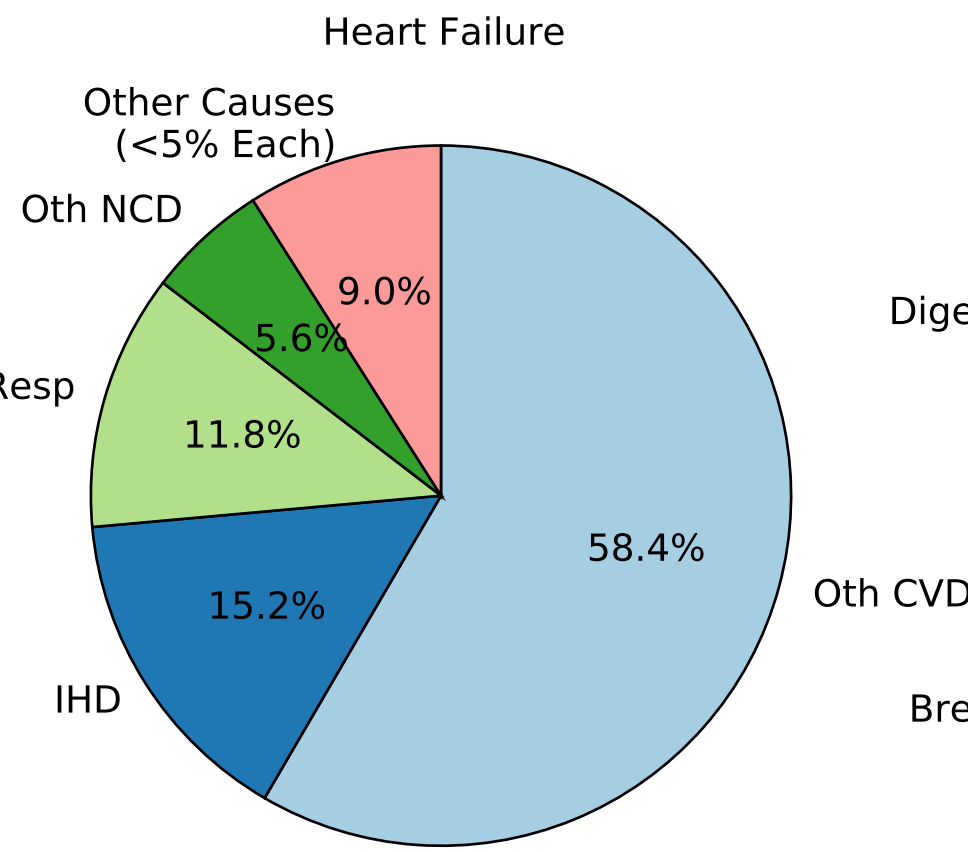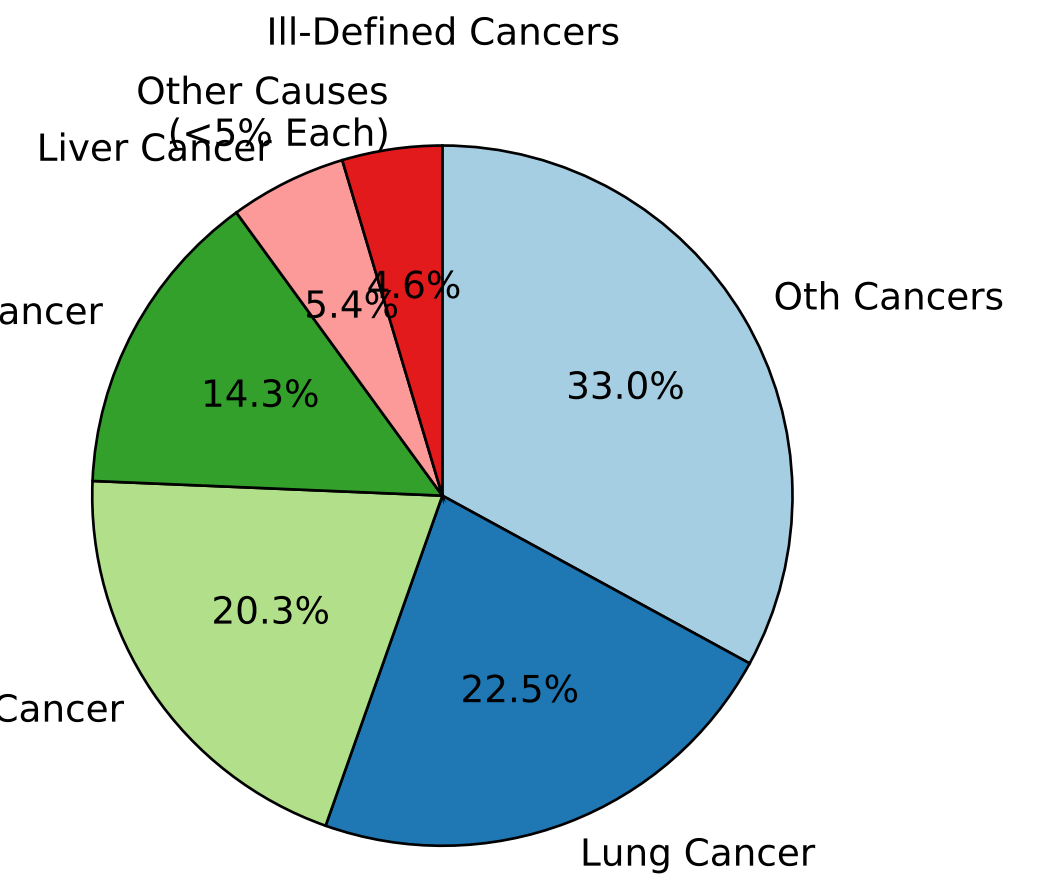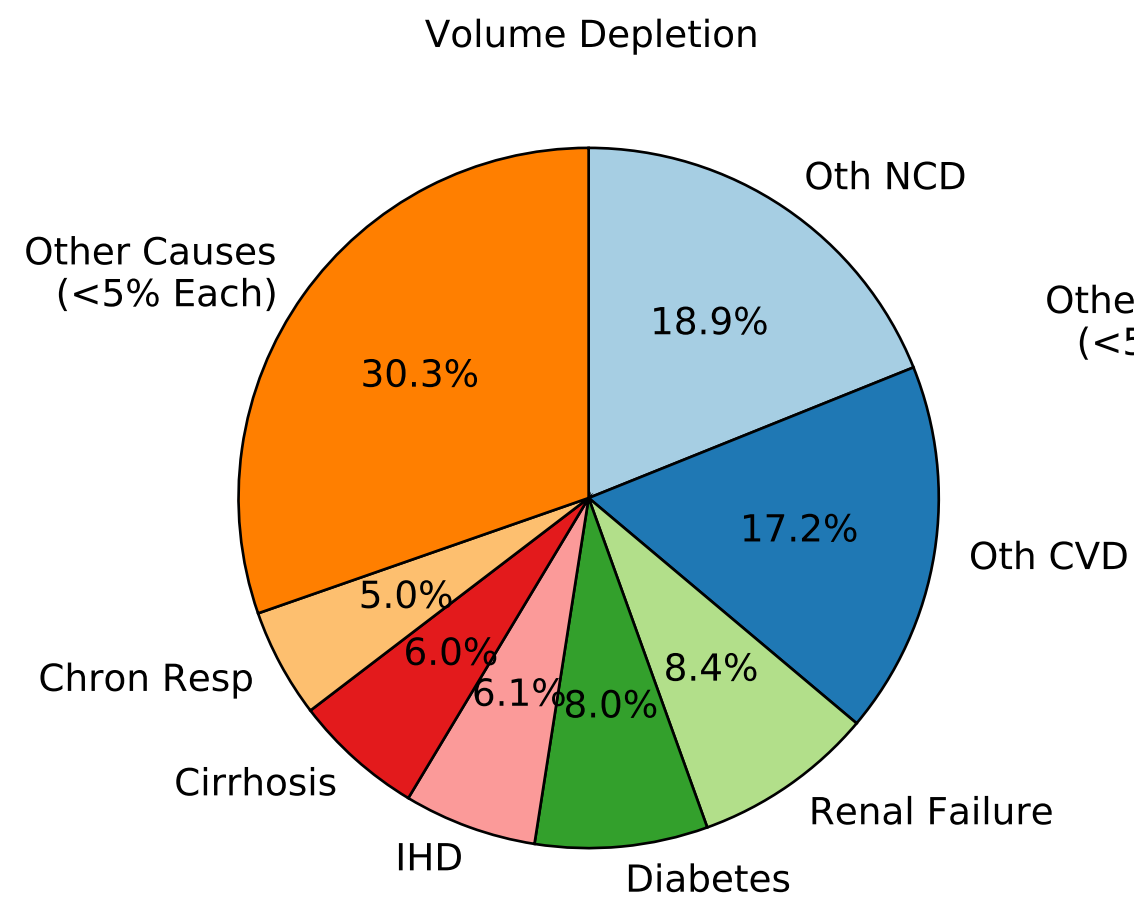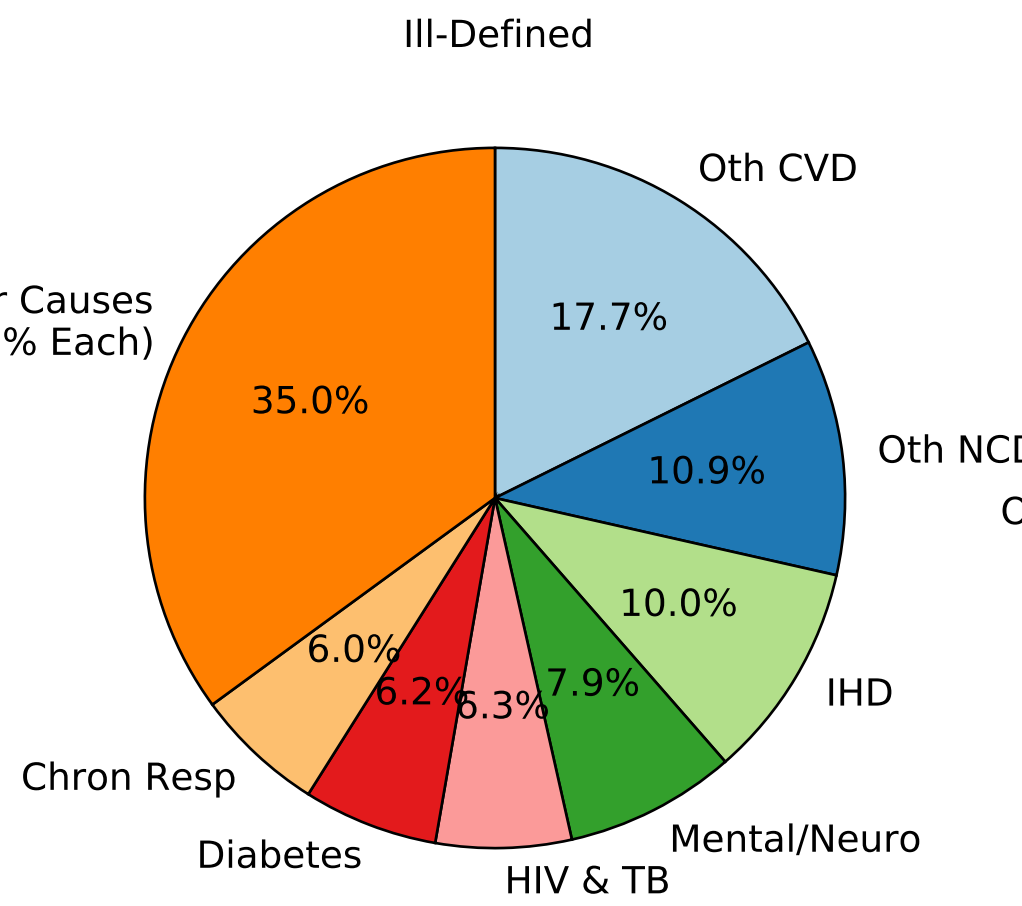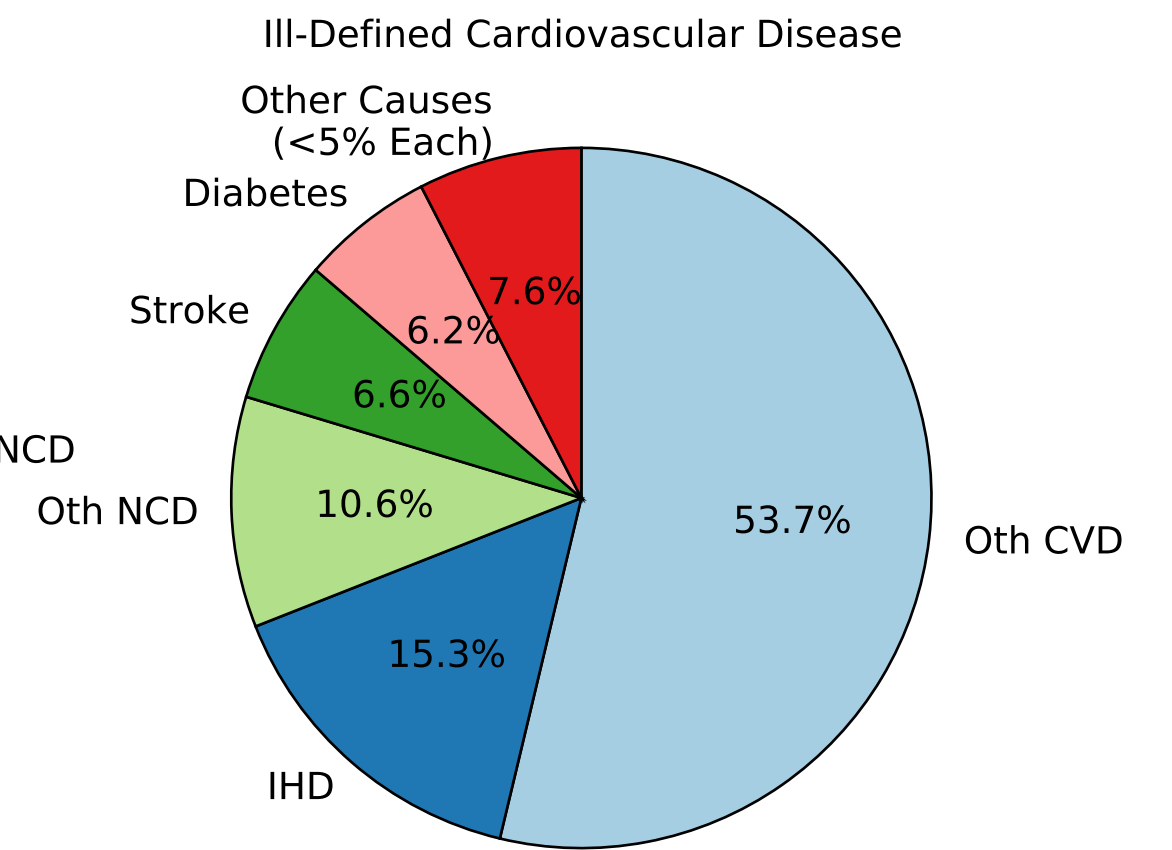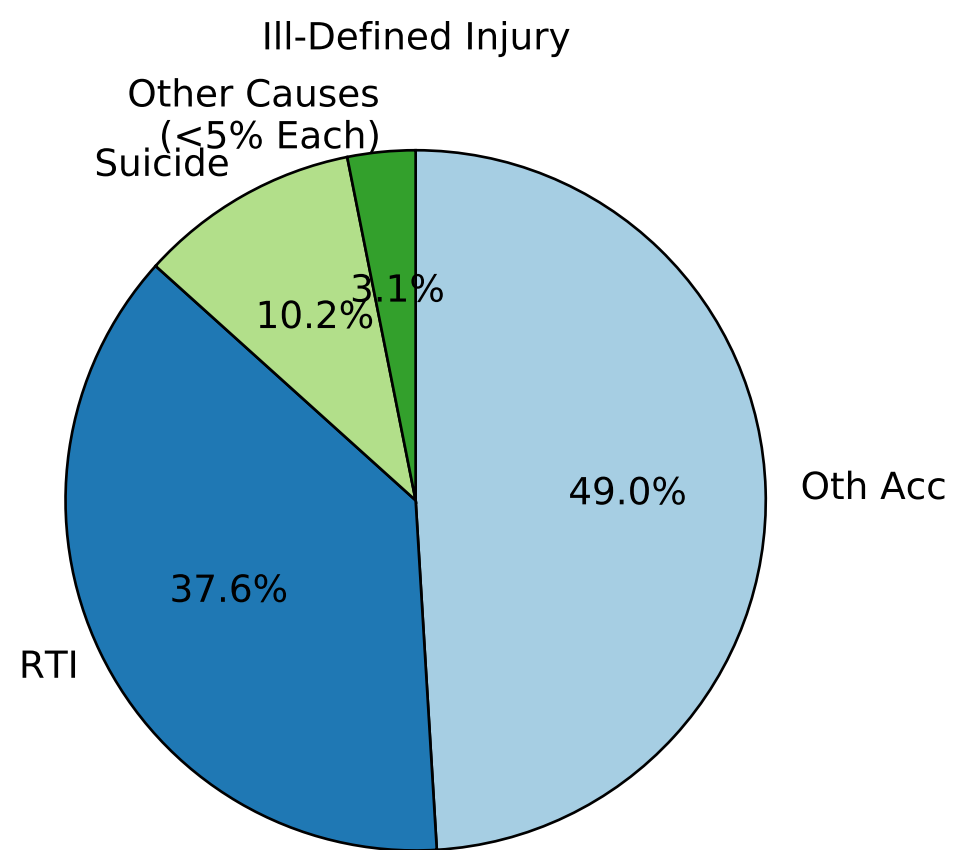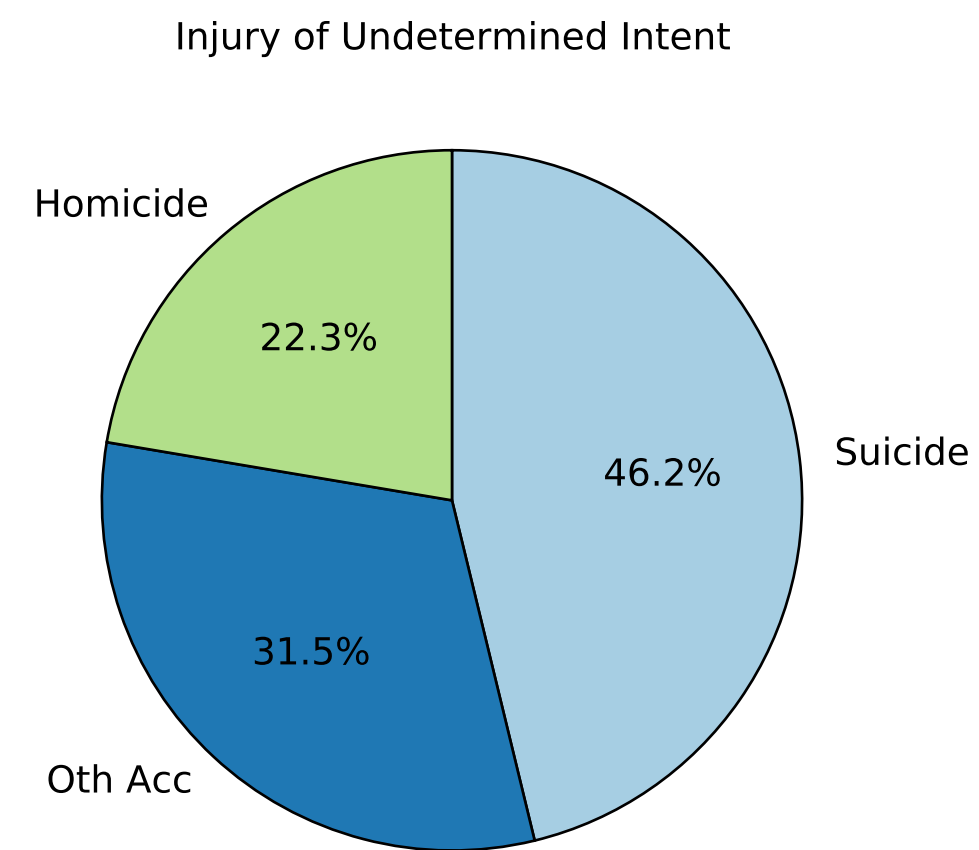

III-Defined Infectious Disease

ICD 9  
Female, Age 55

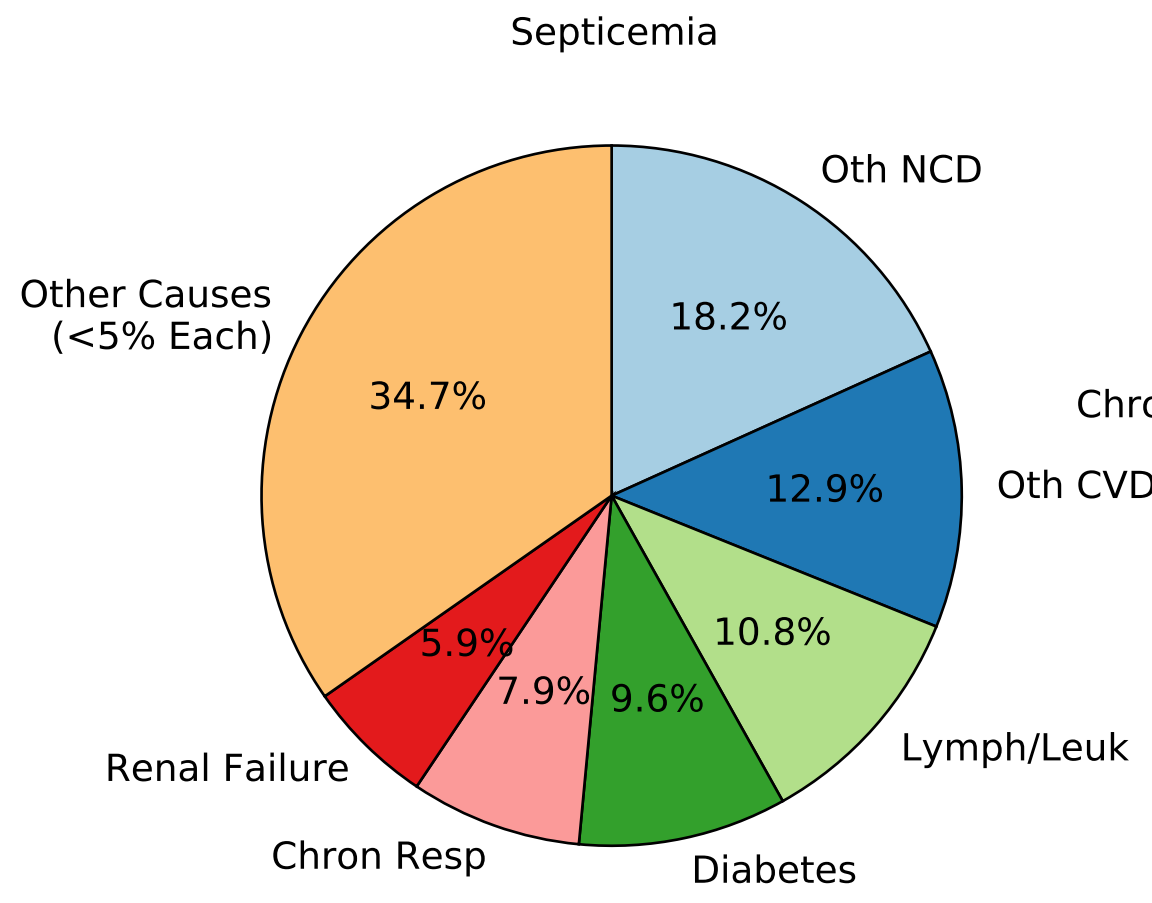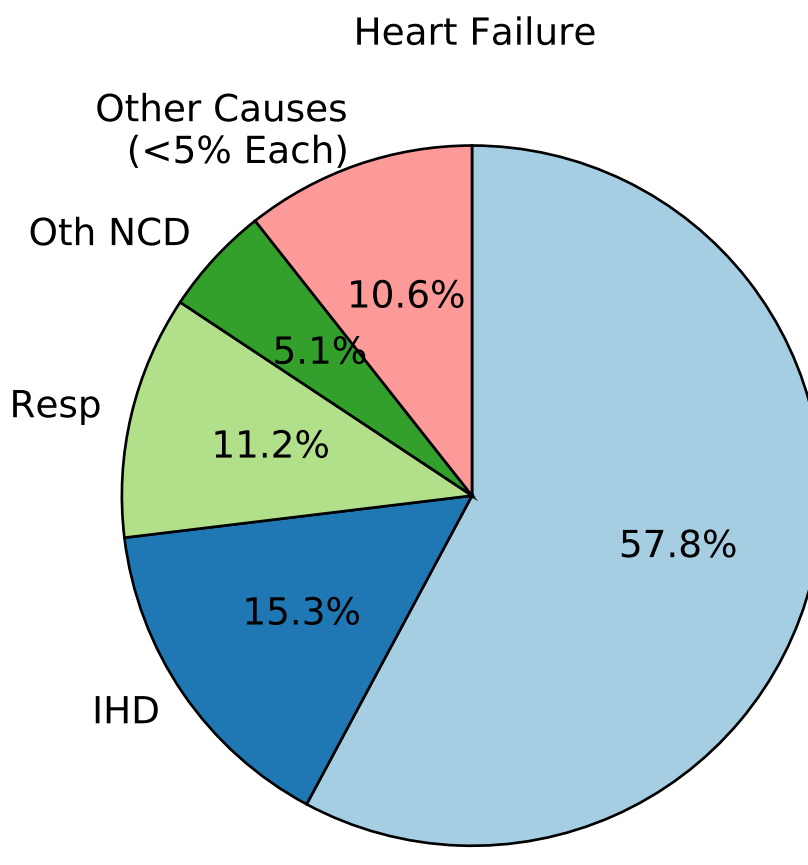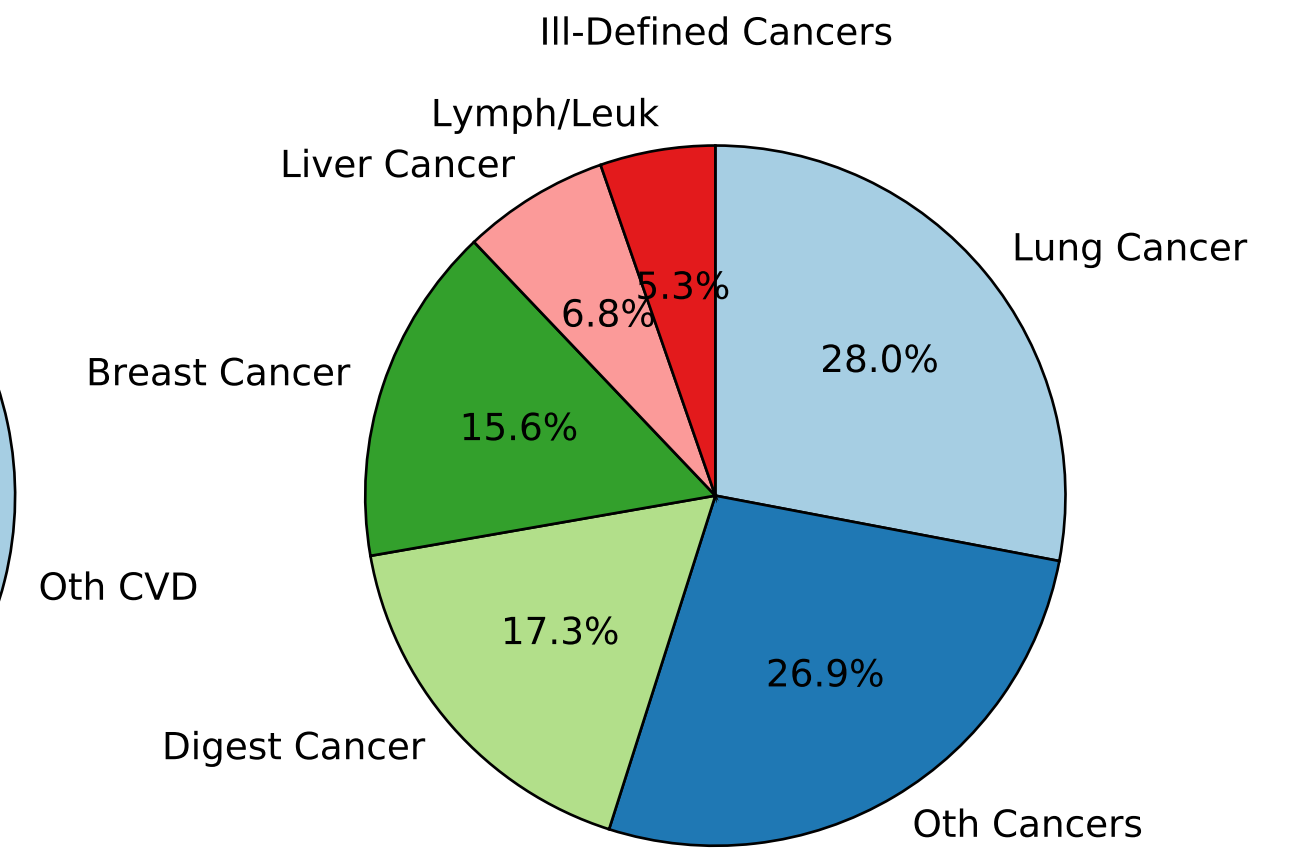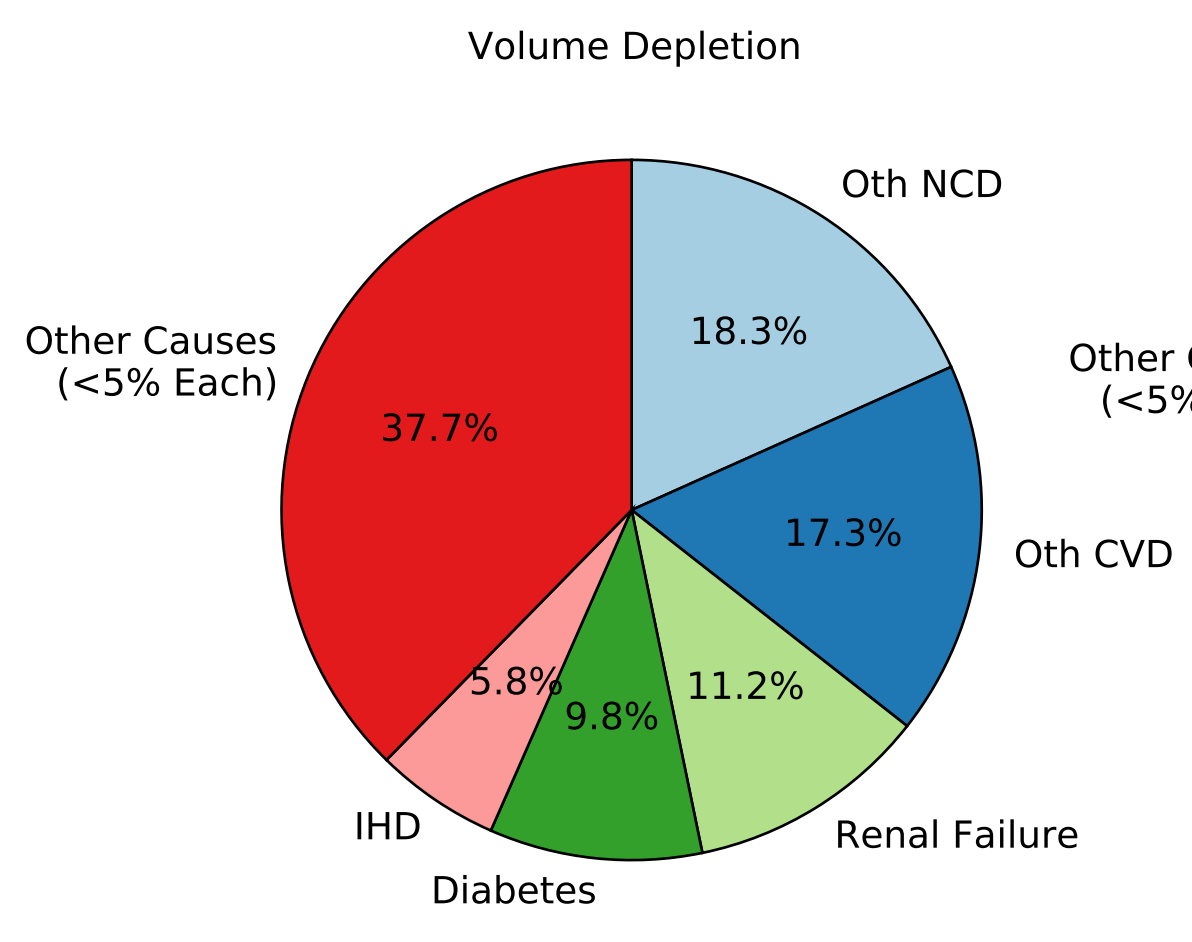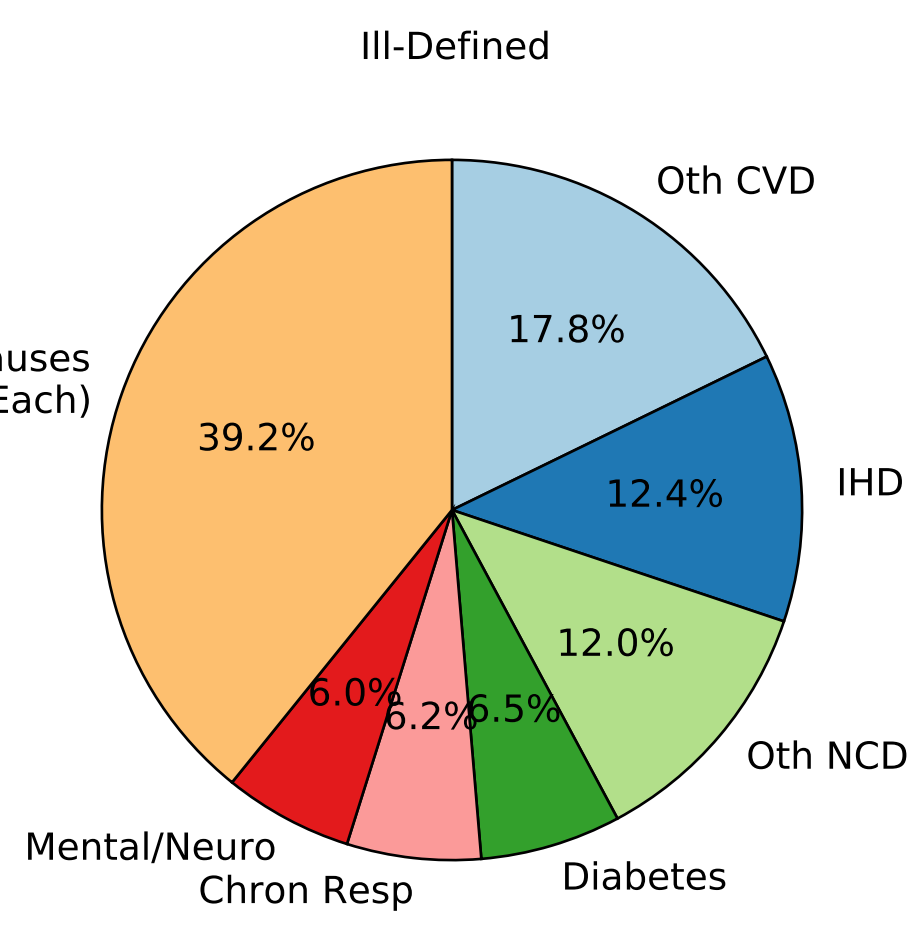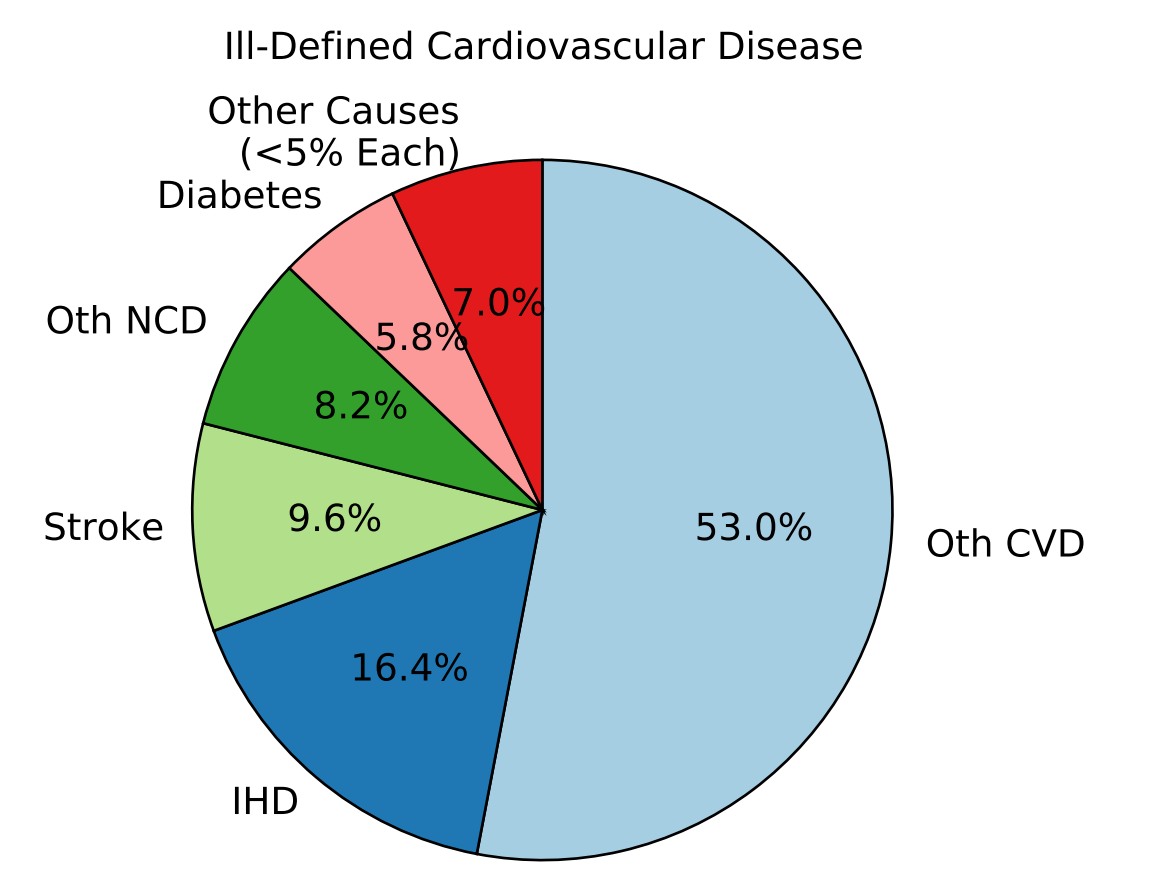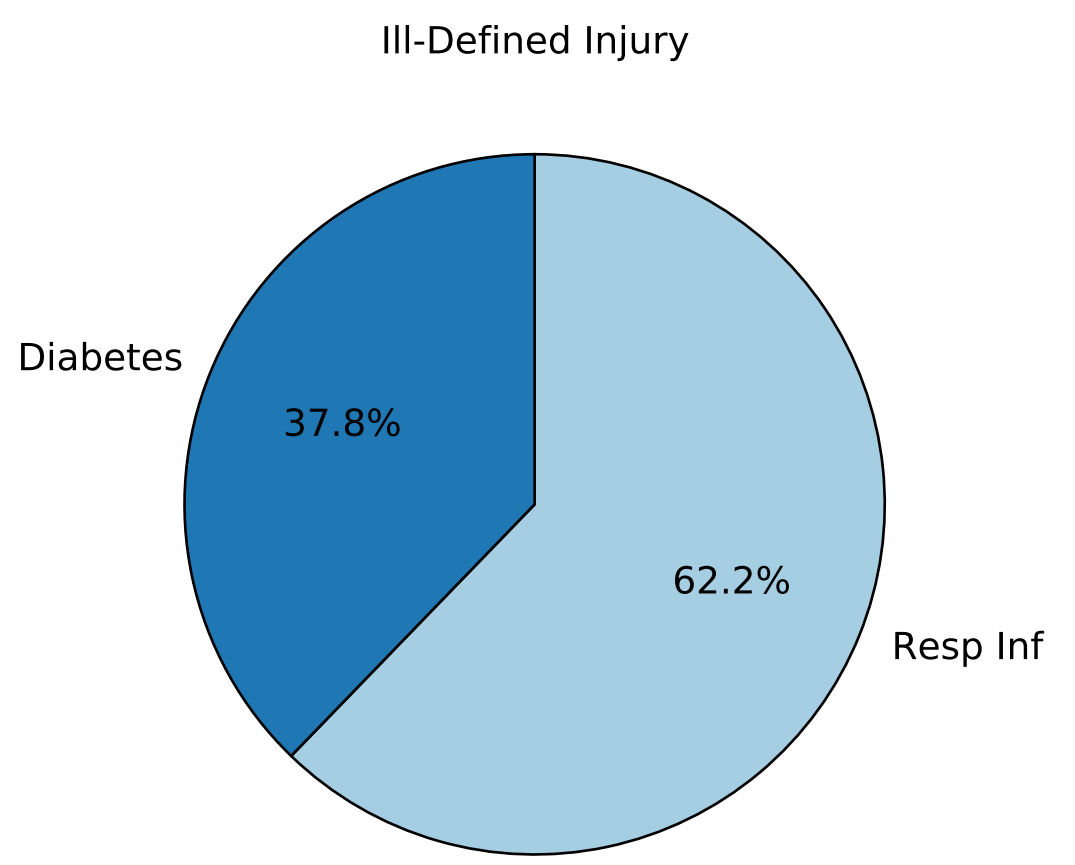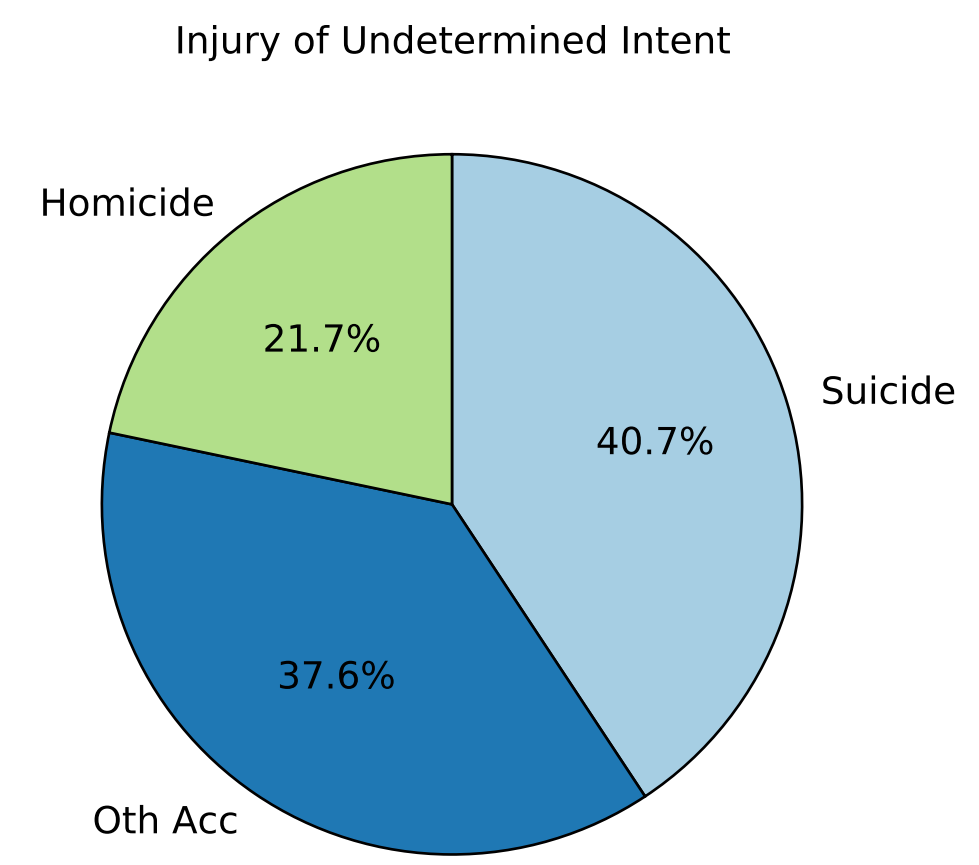

Ill-Defined Infectious Disease

ICD 9  
Female, Age 60

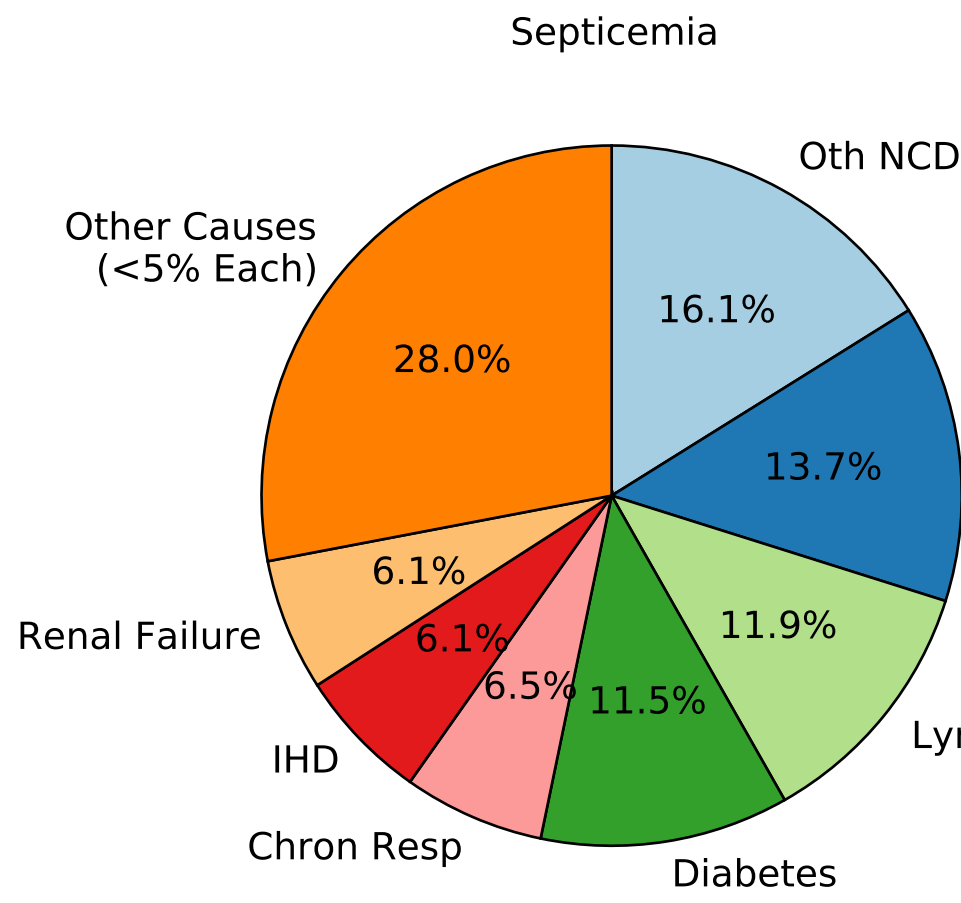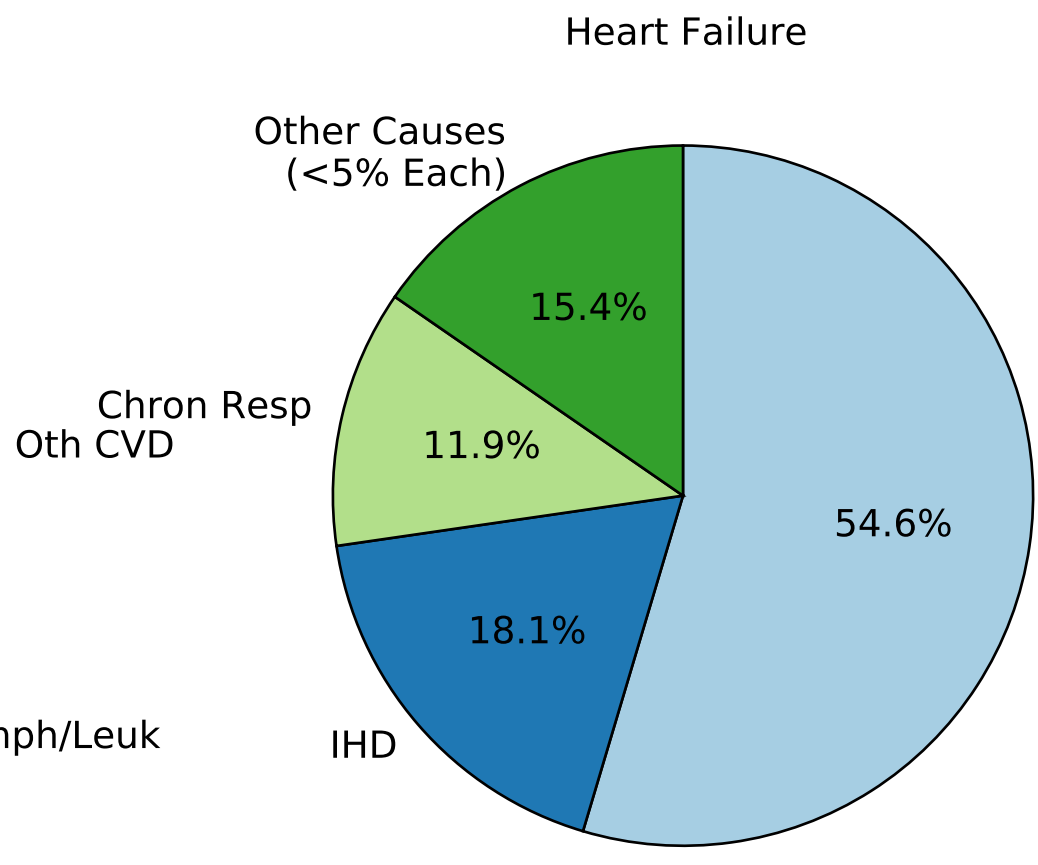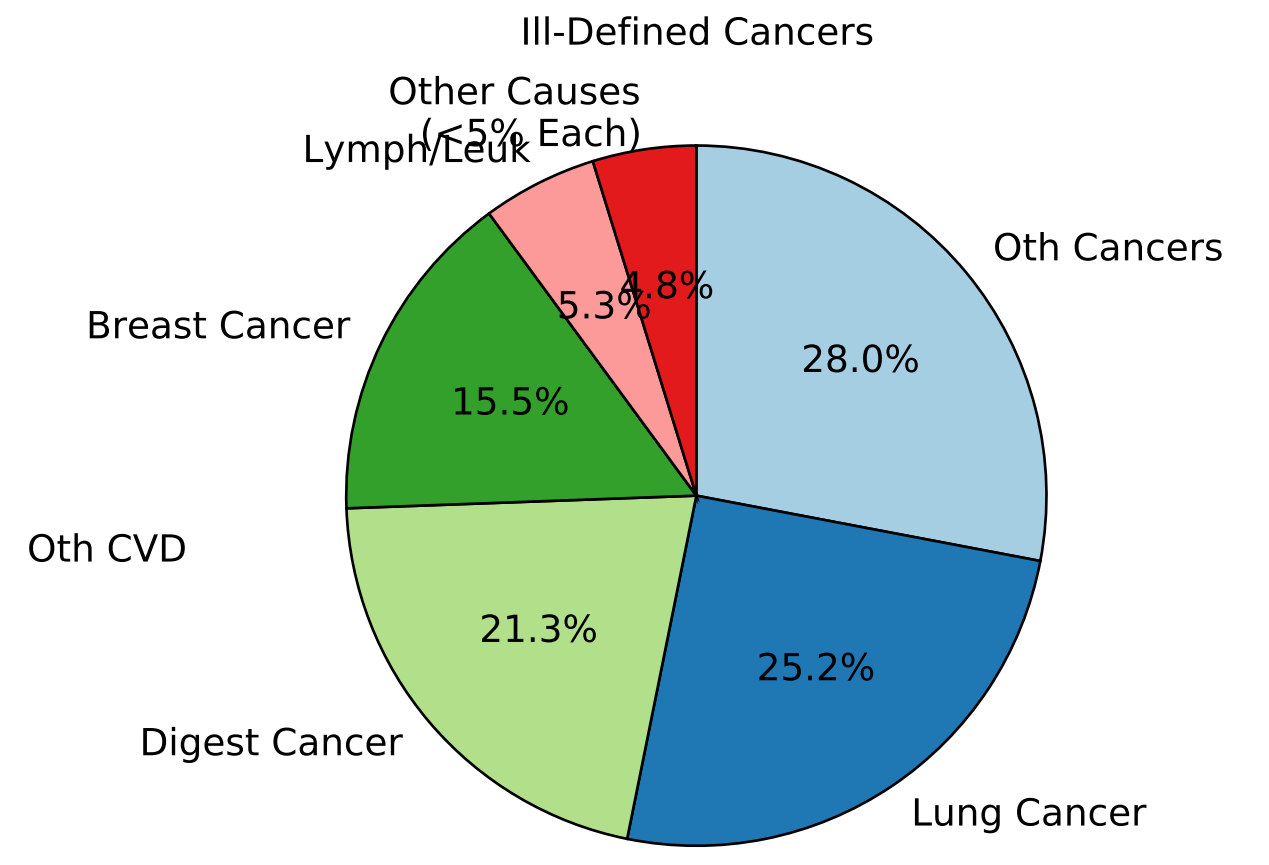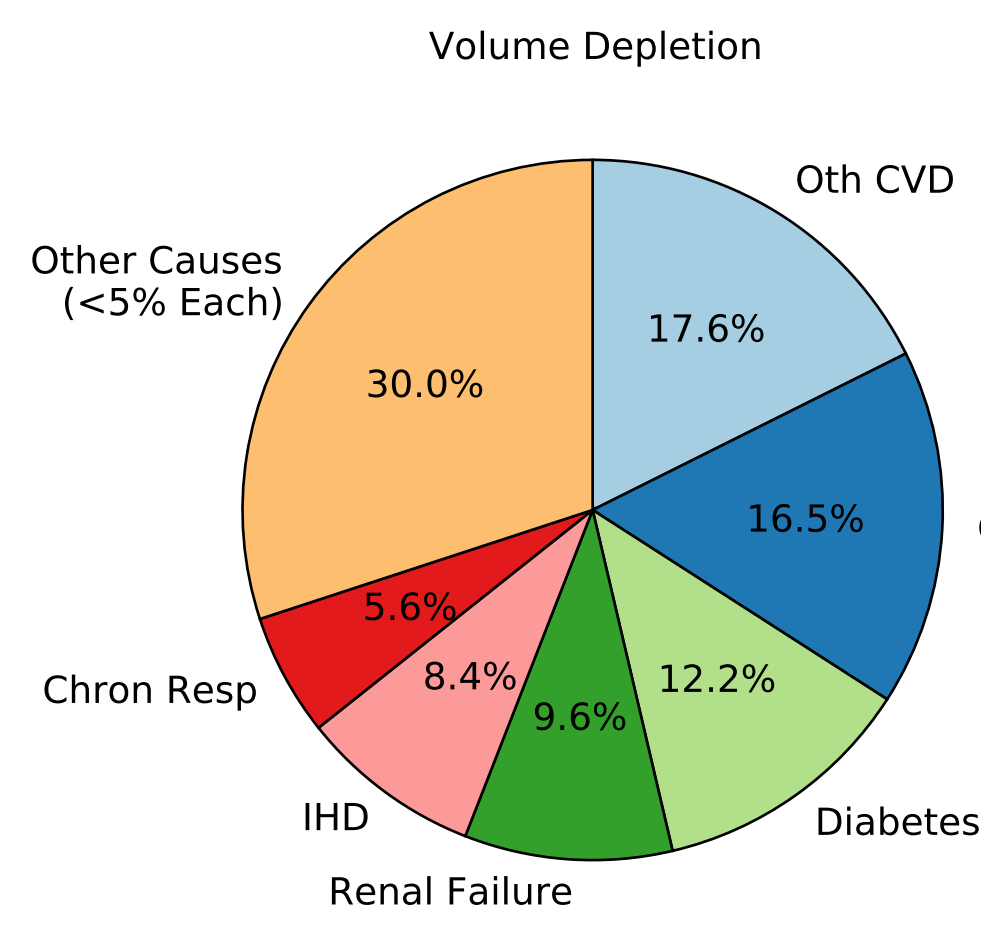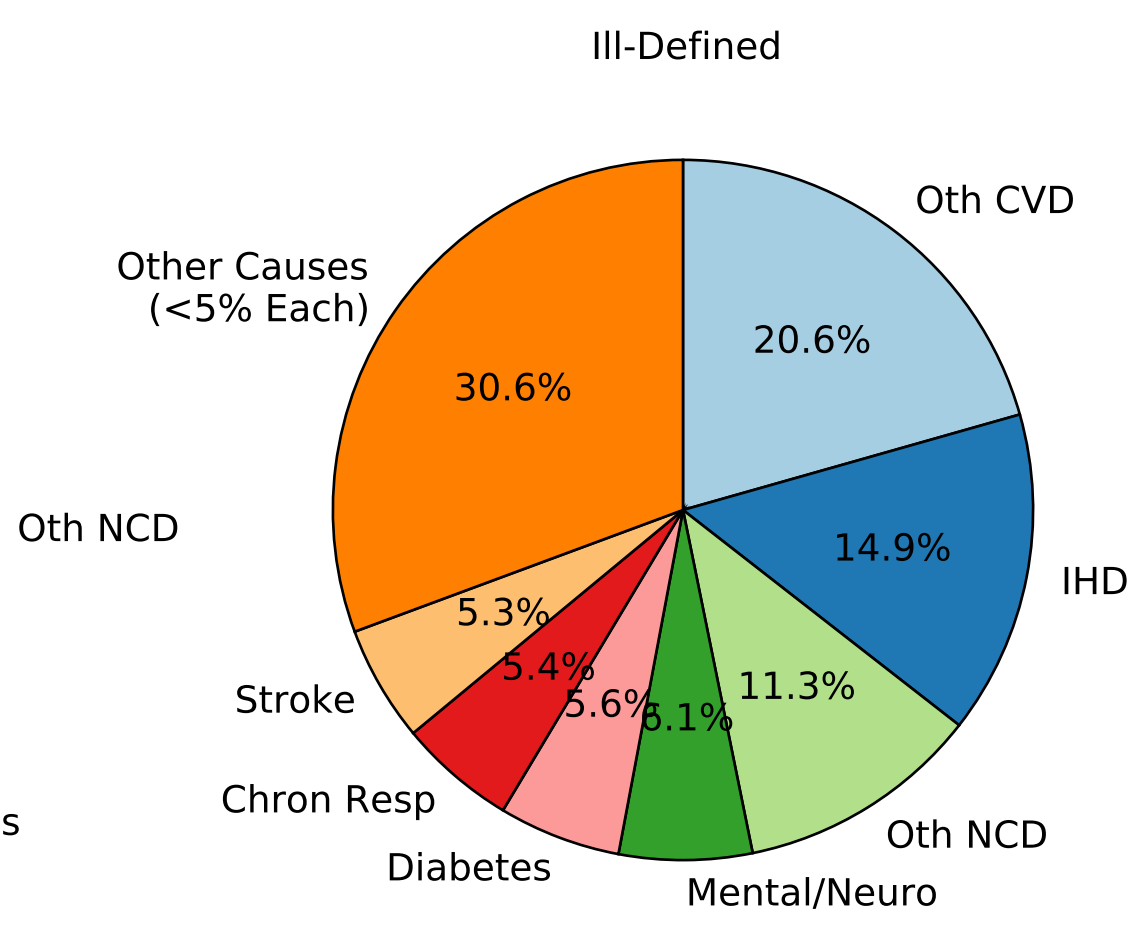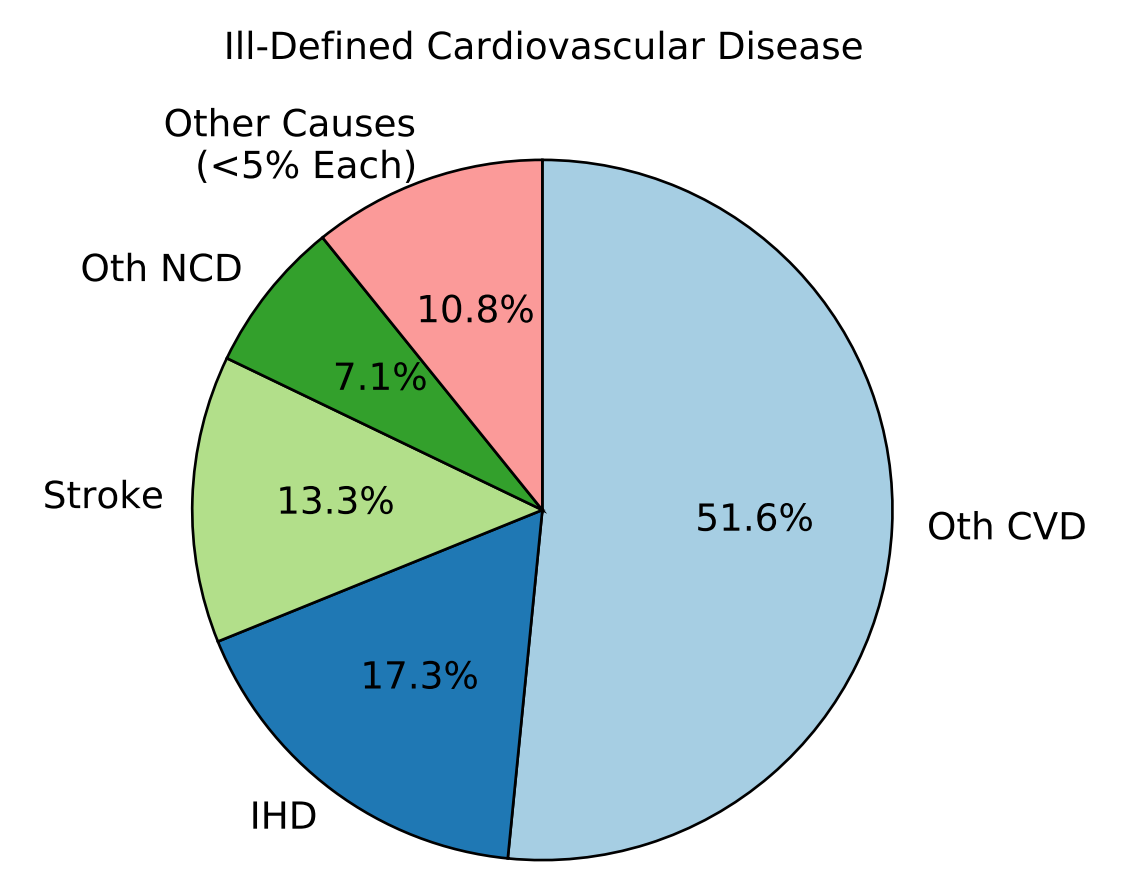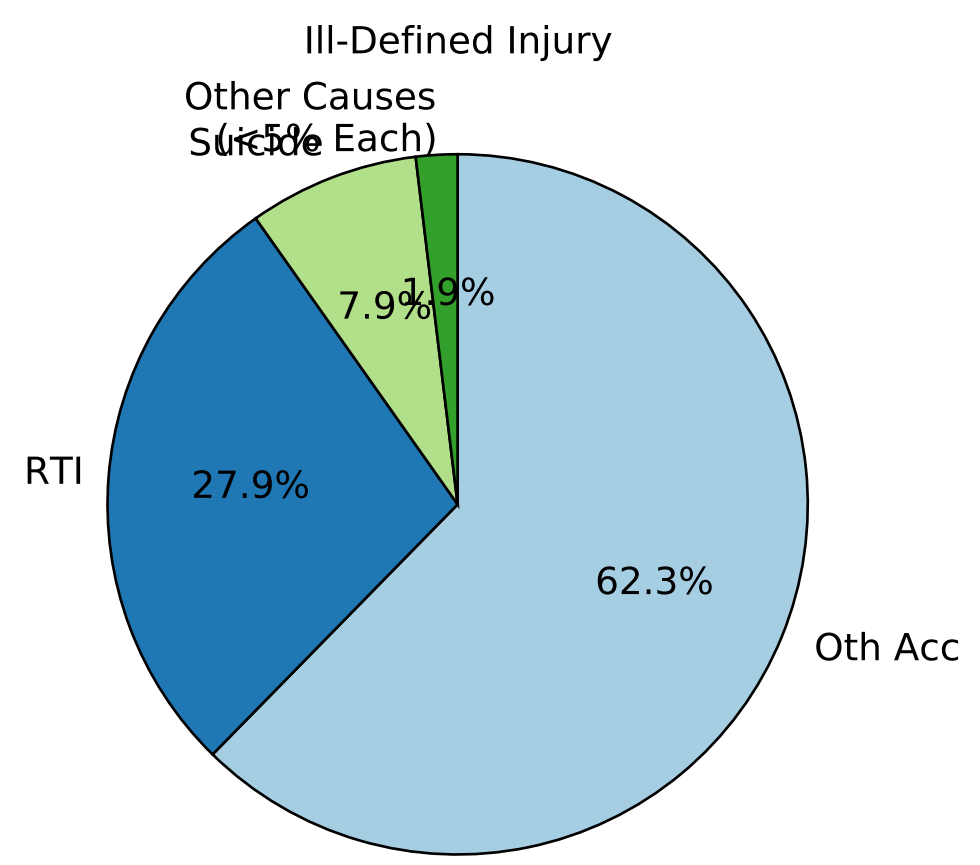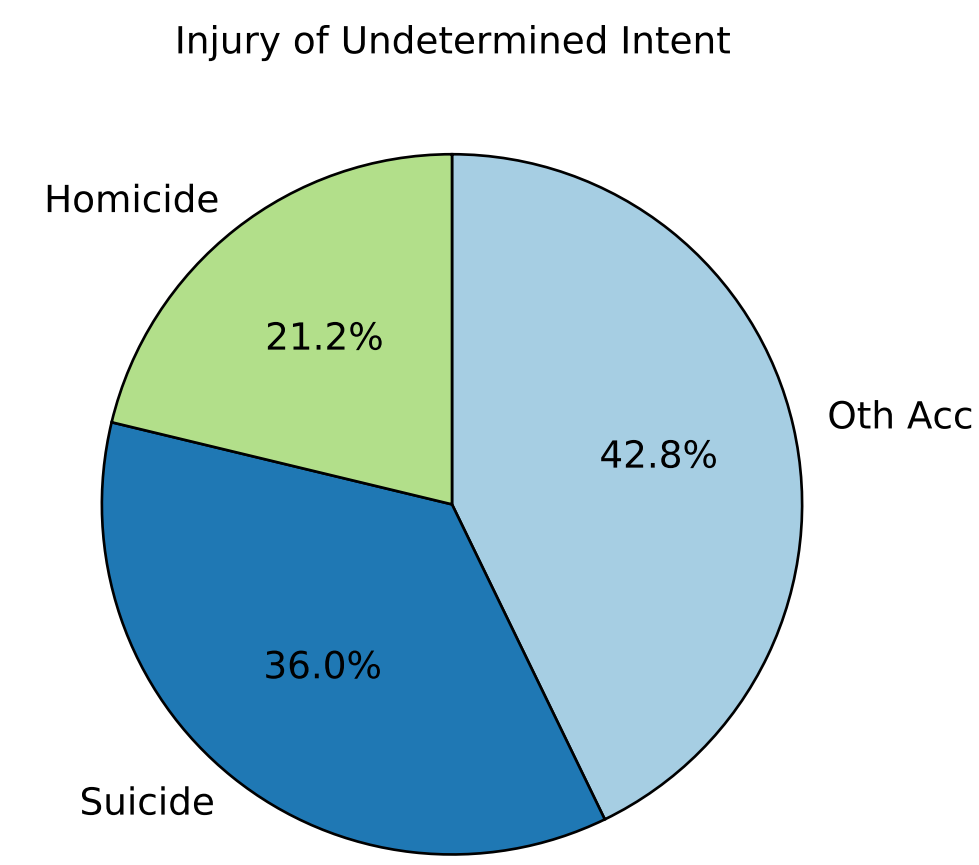

Ill-Defined Infectious Disease

ICD 9  
Female, Age 65

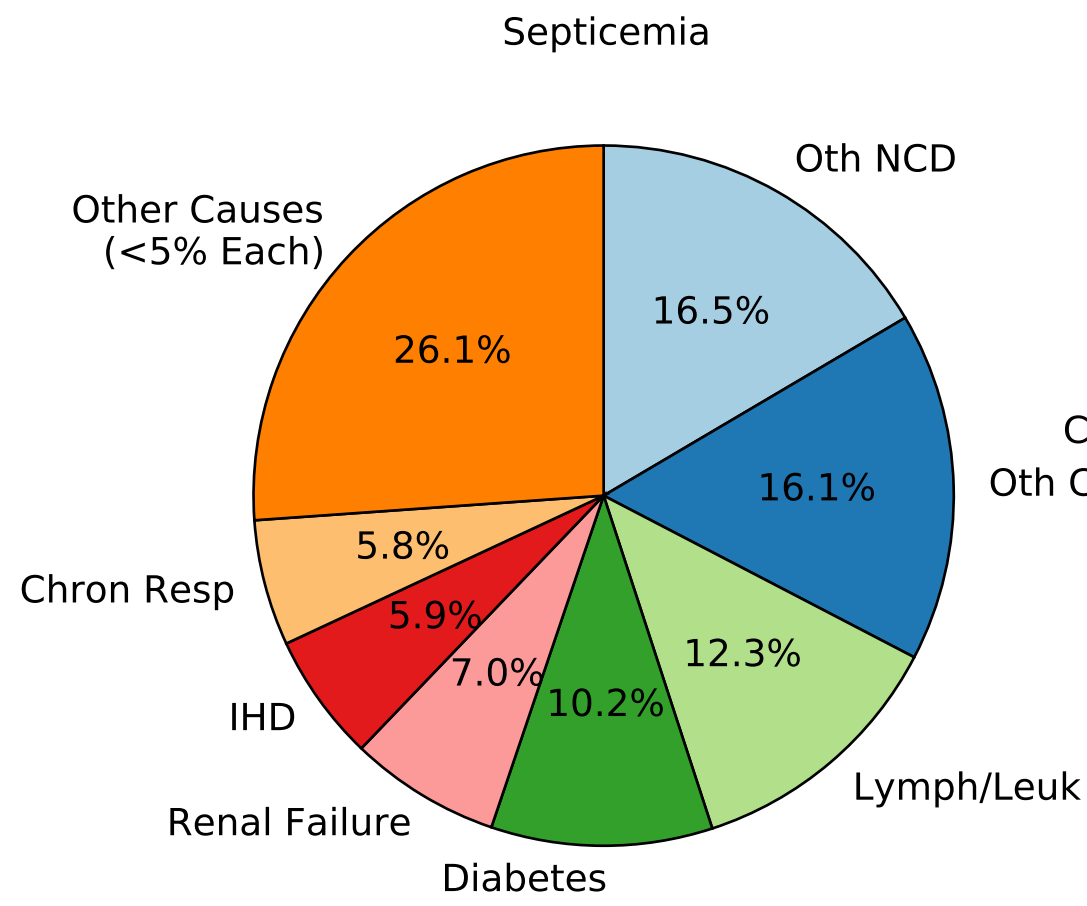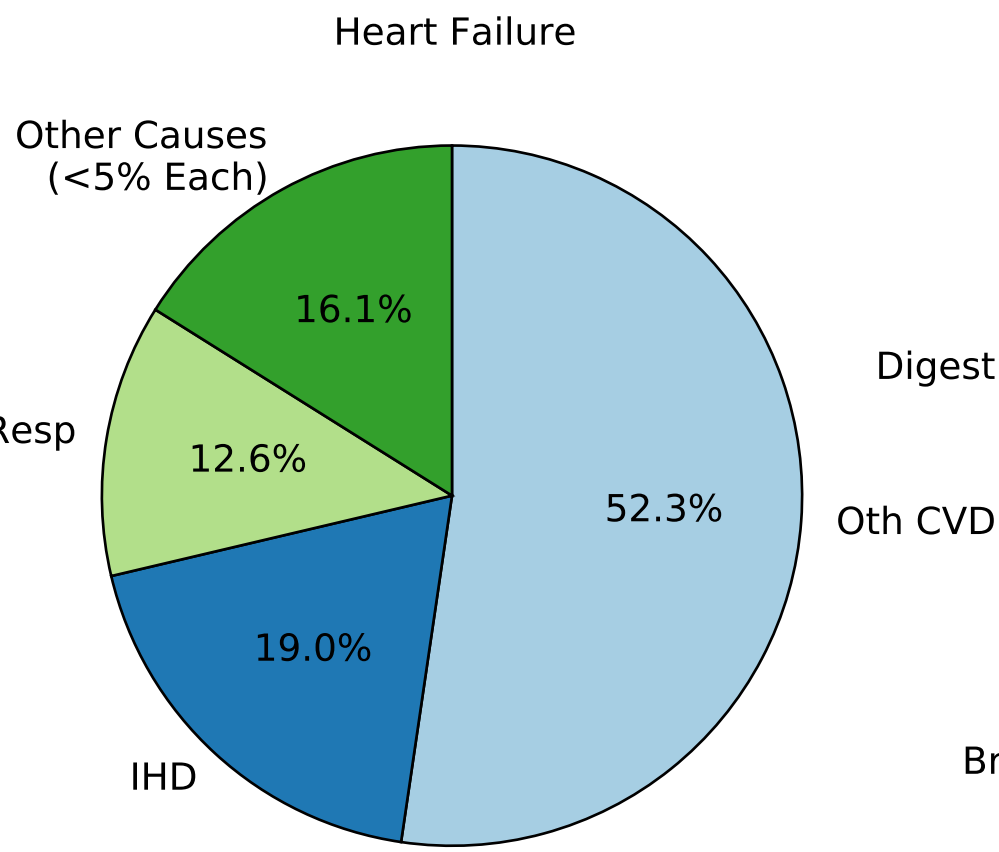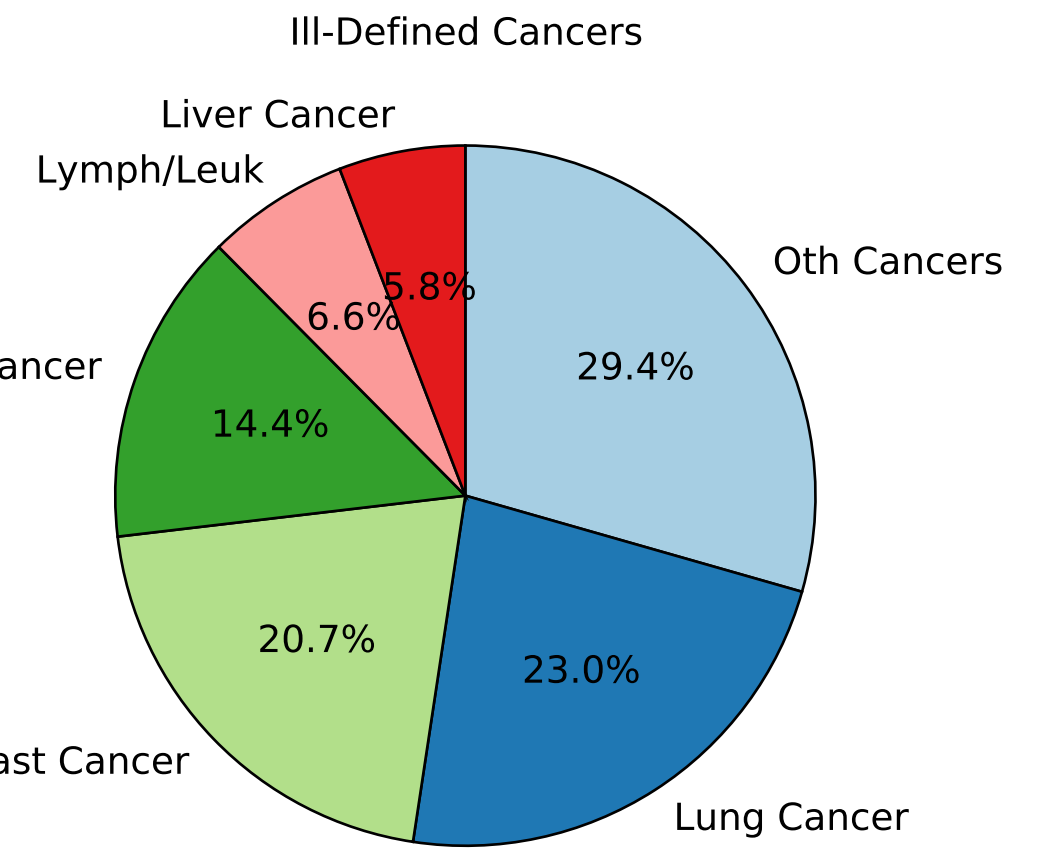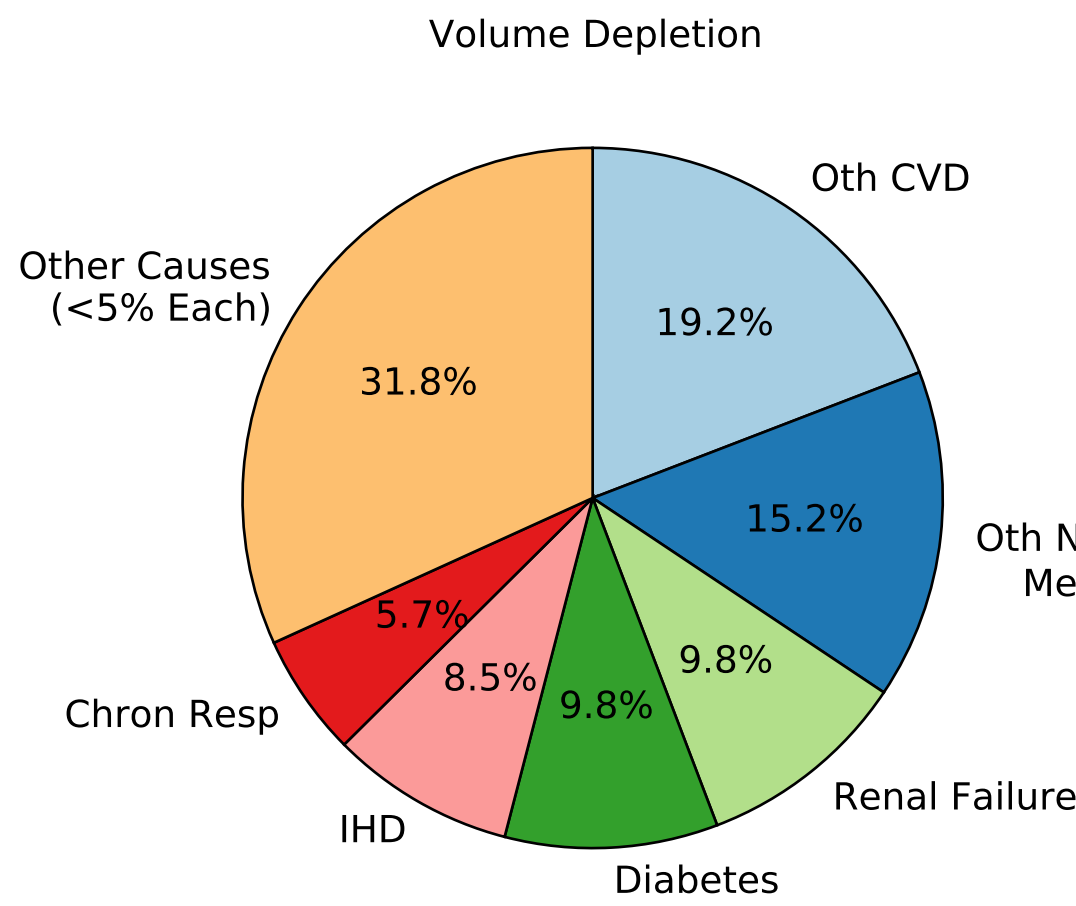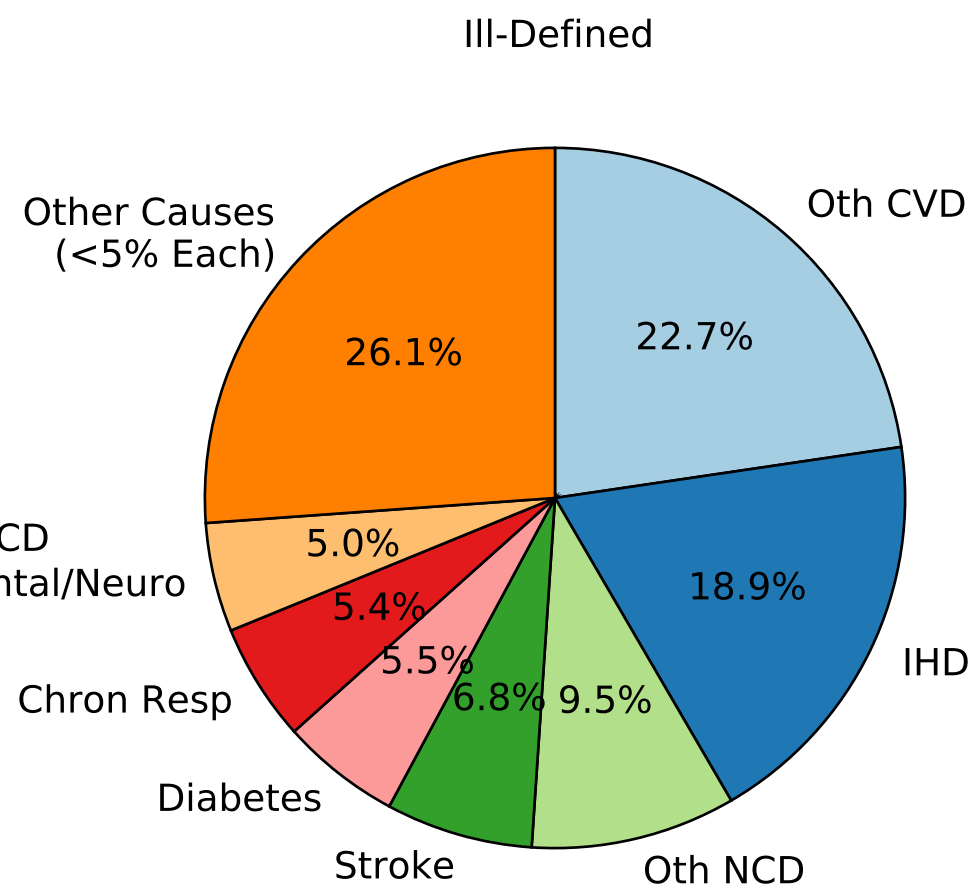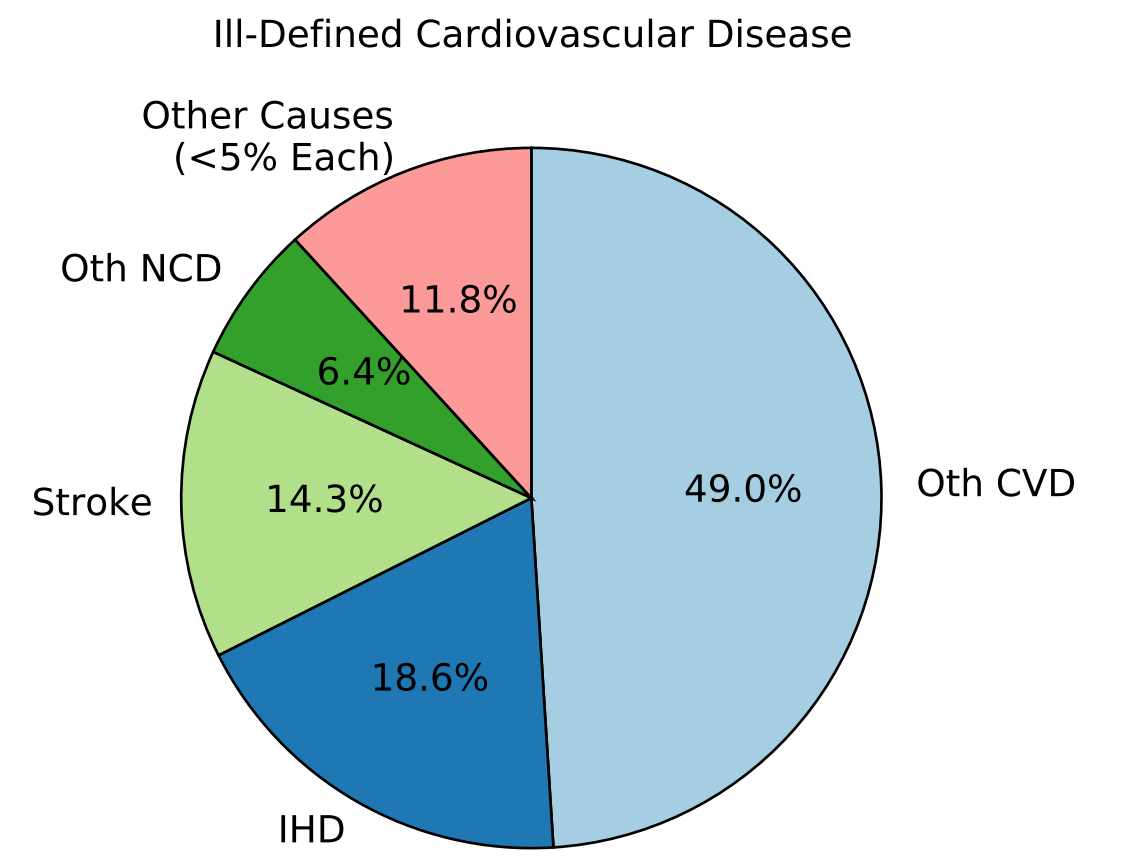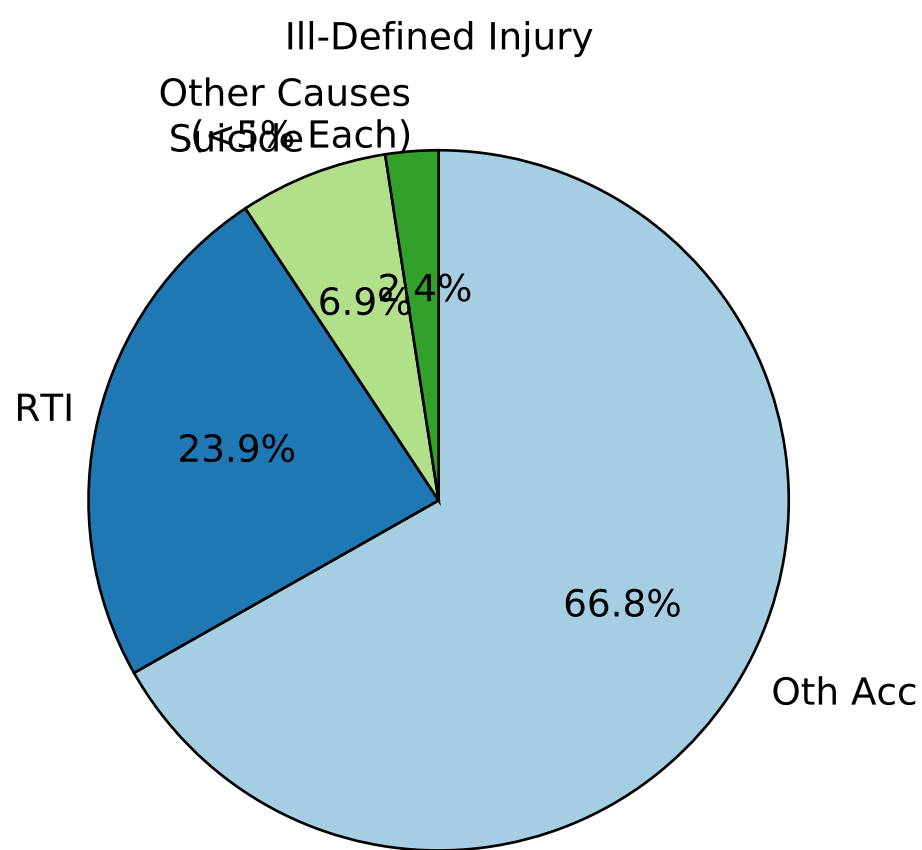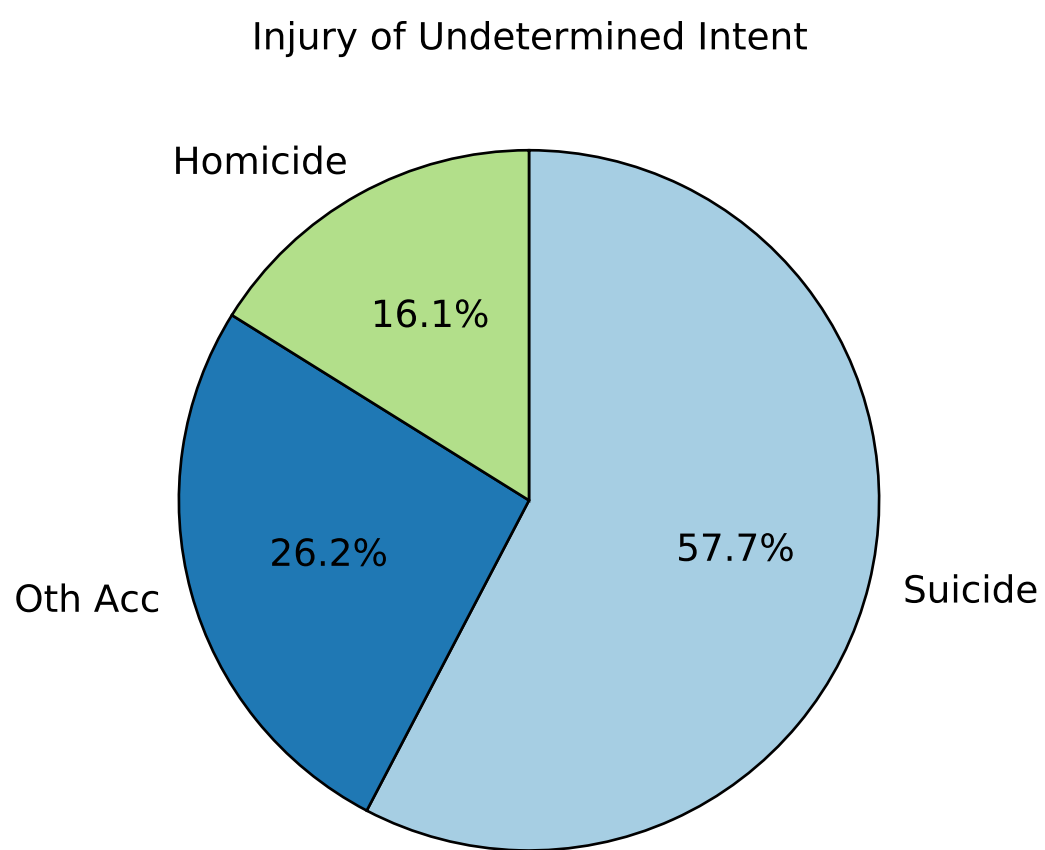

Ill-Defined Infectious Disease

ICD 9  
Female, Age 70

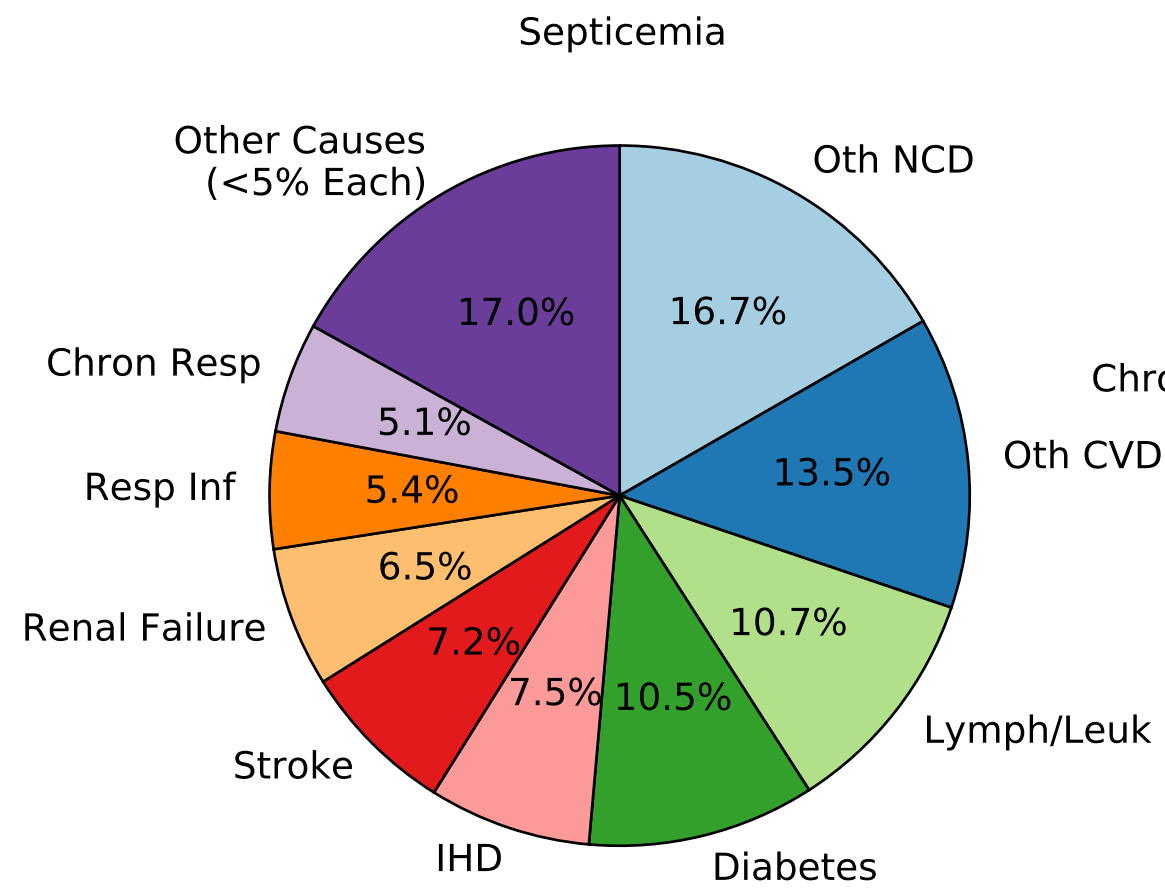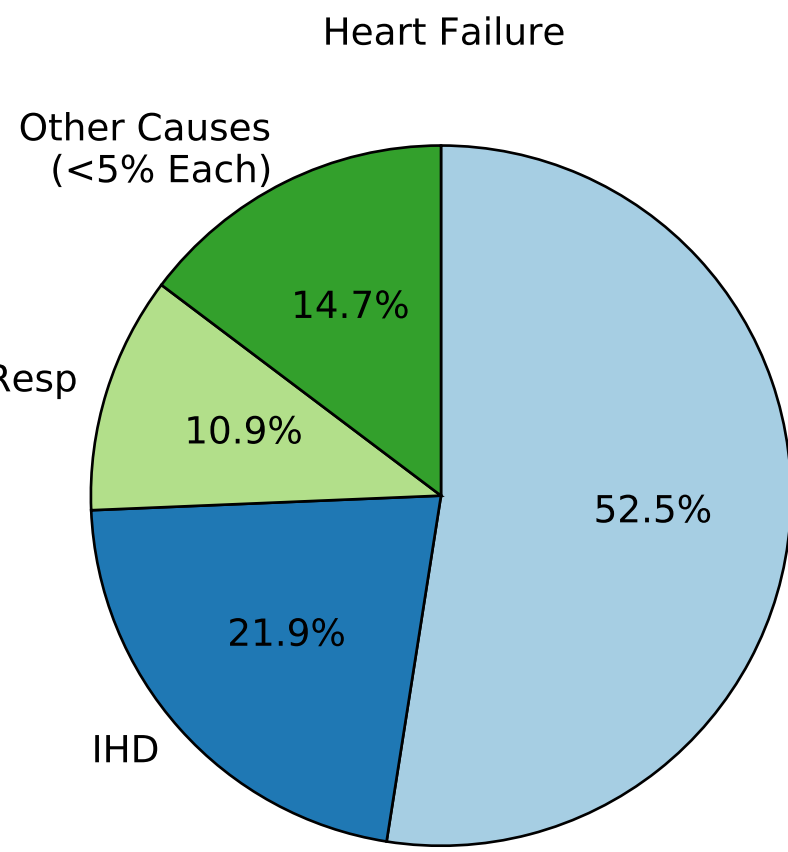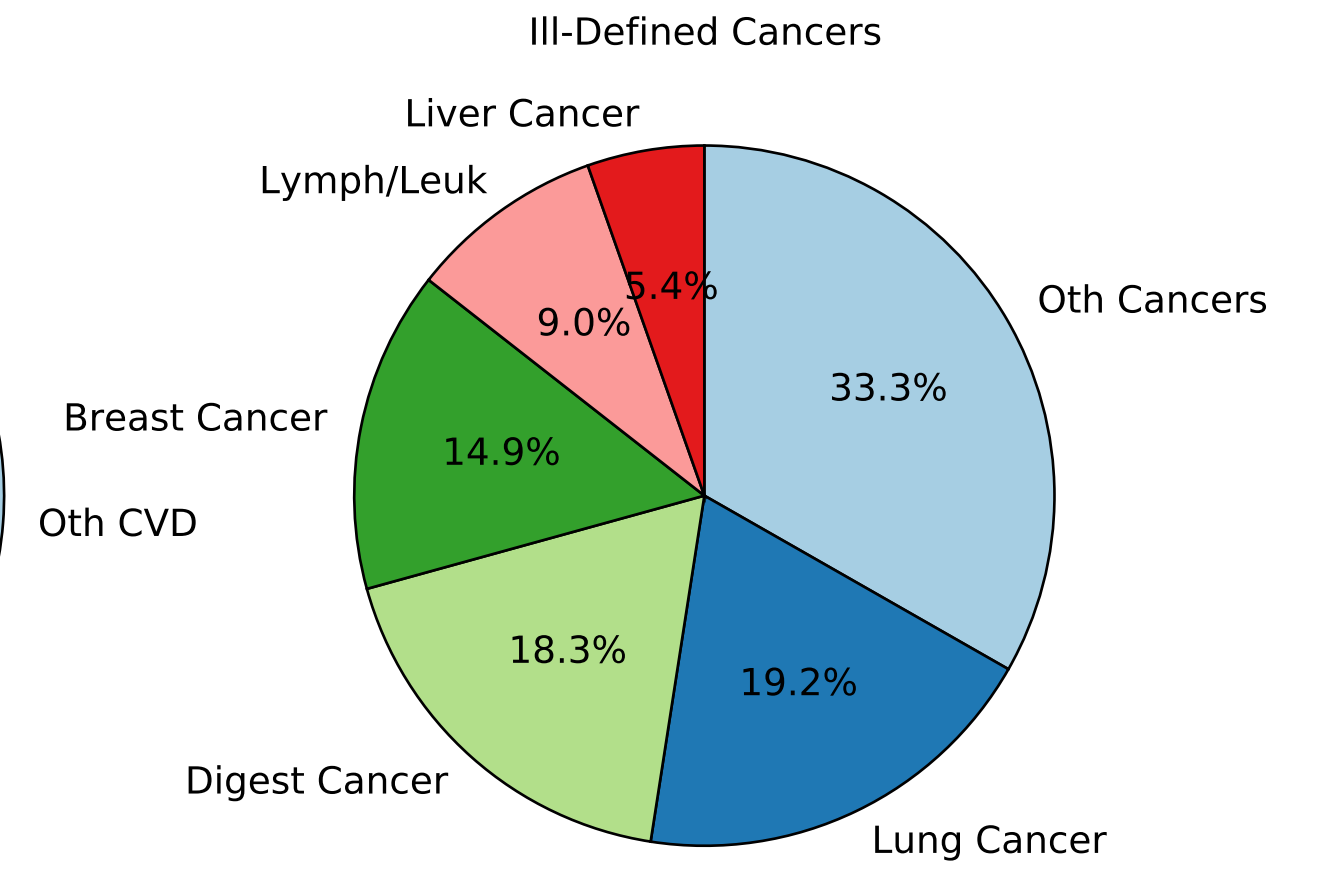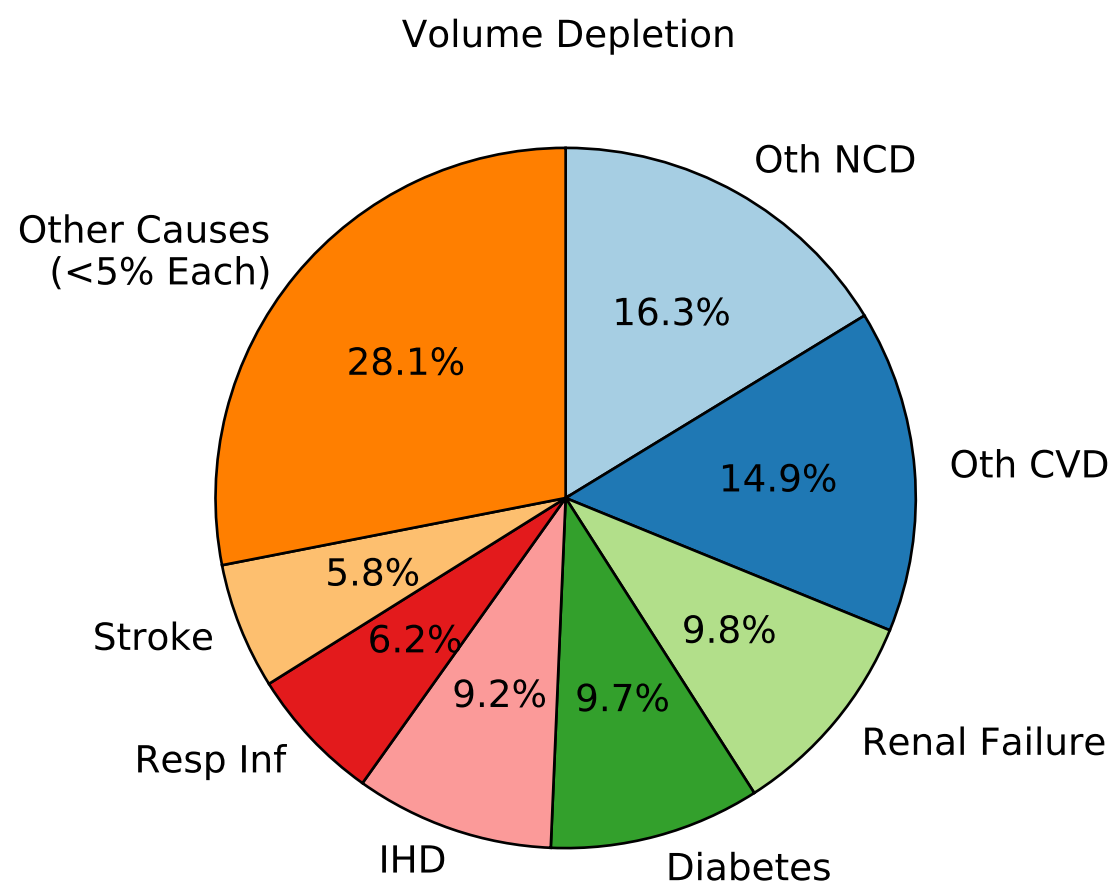

### Ill-Defined

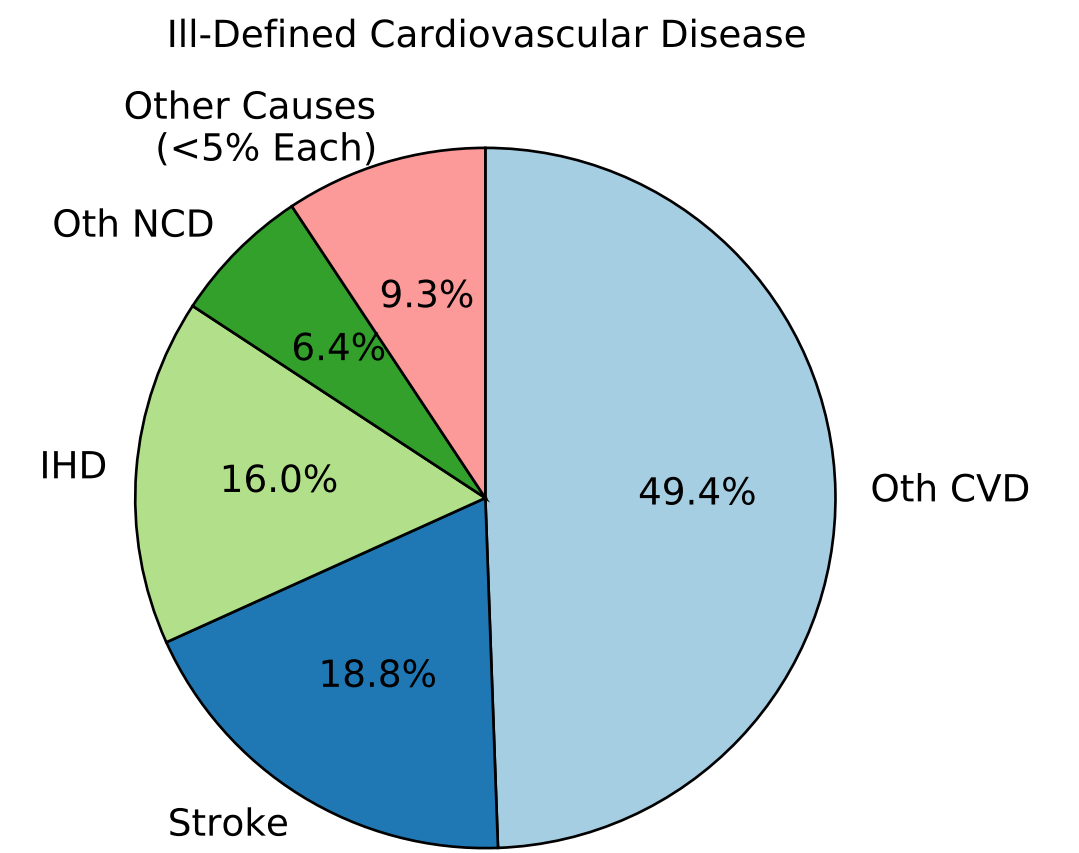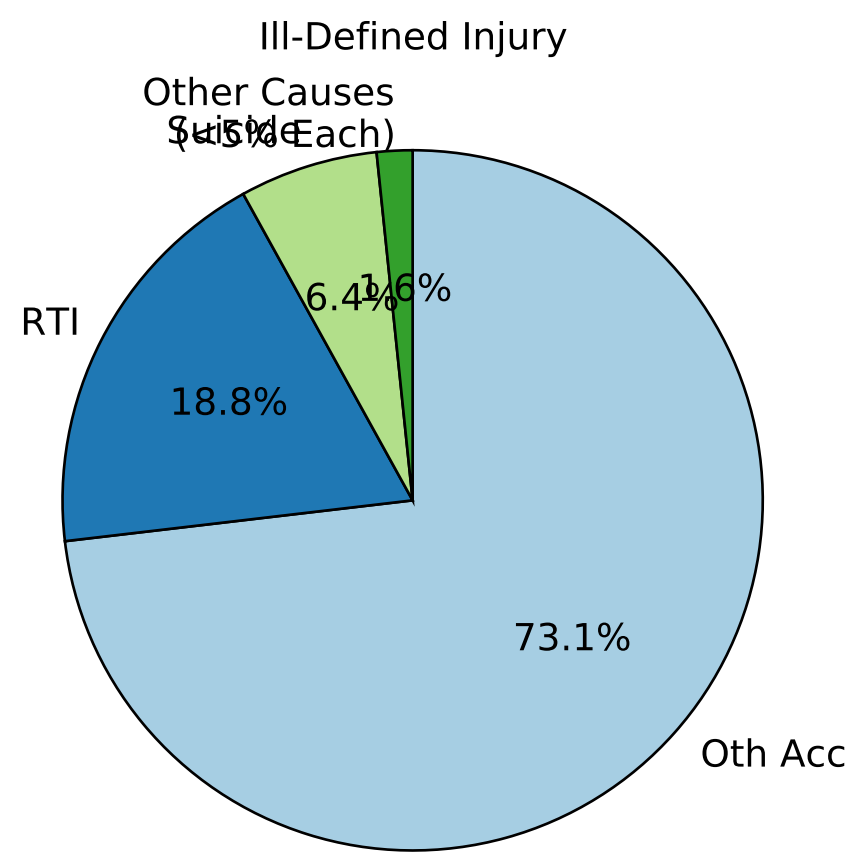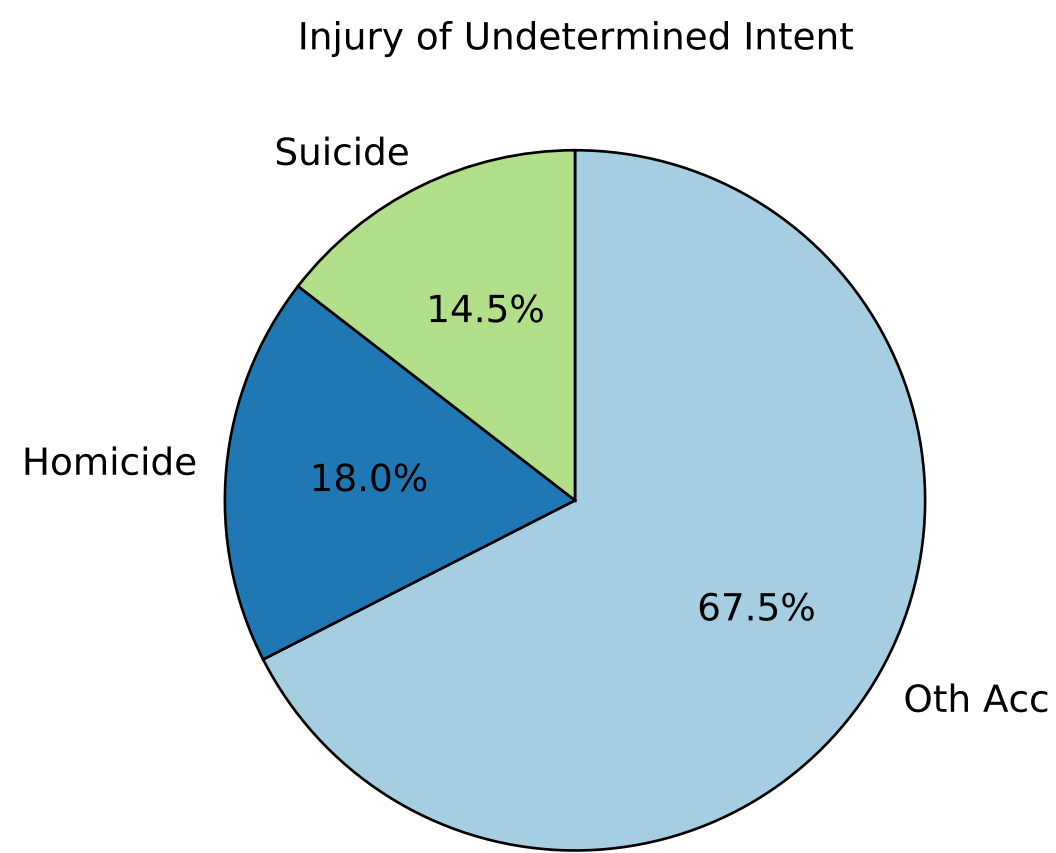

### Ill-Defined Infectious Disease

ICD 9  
Female, Age 75

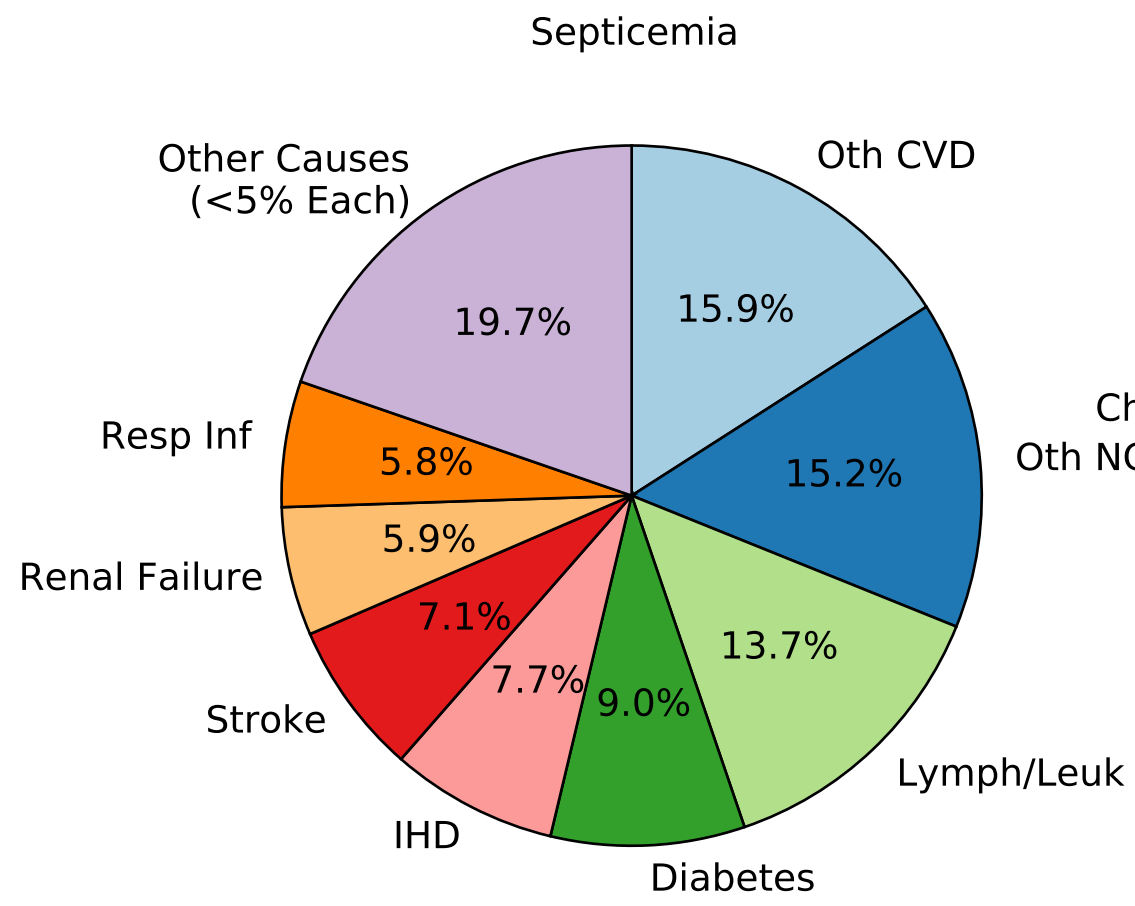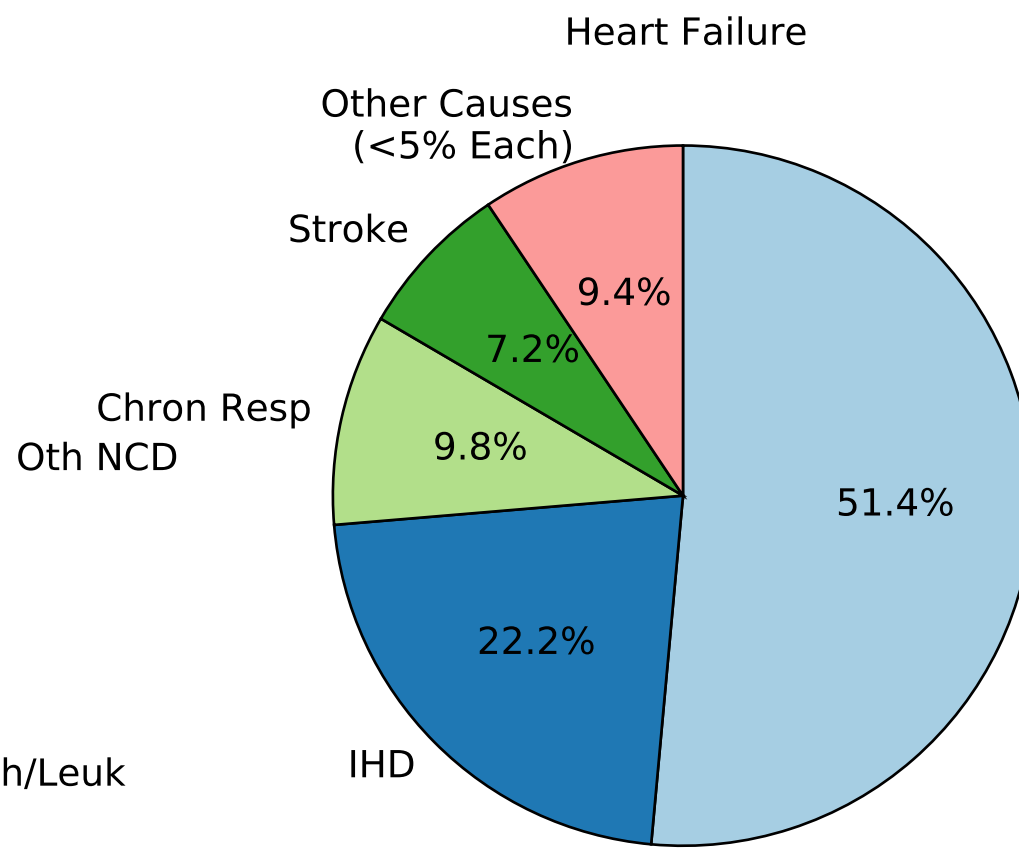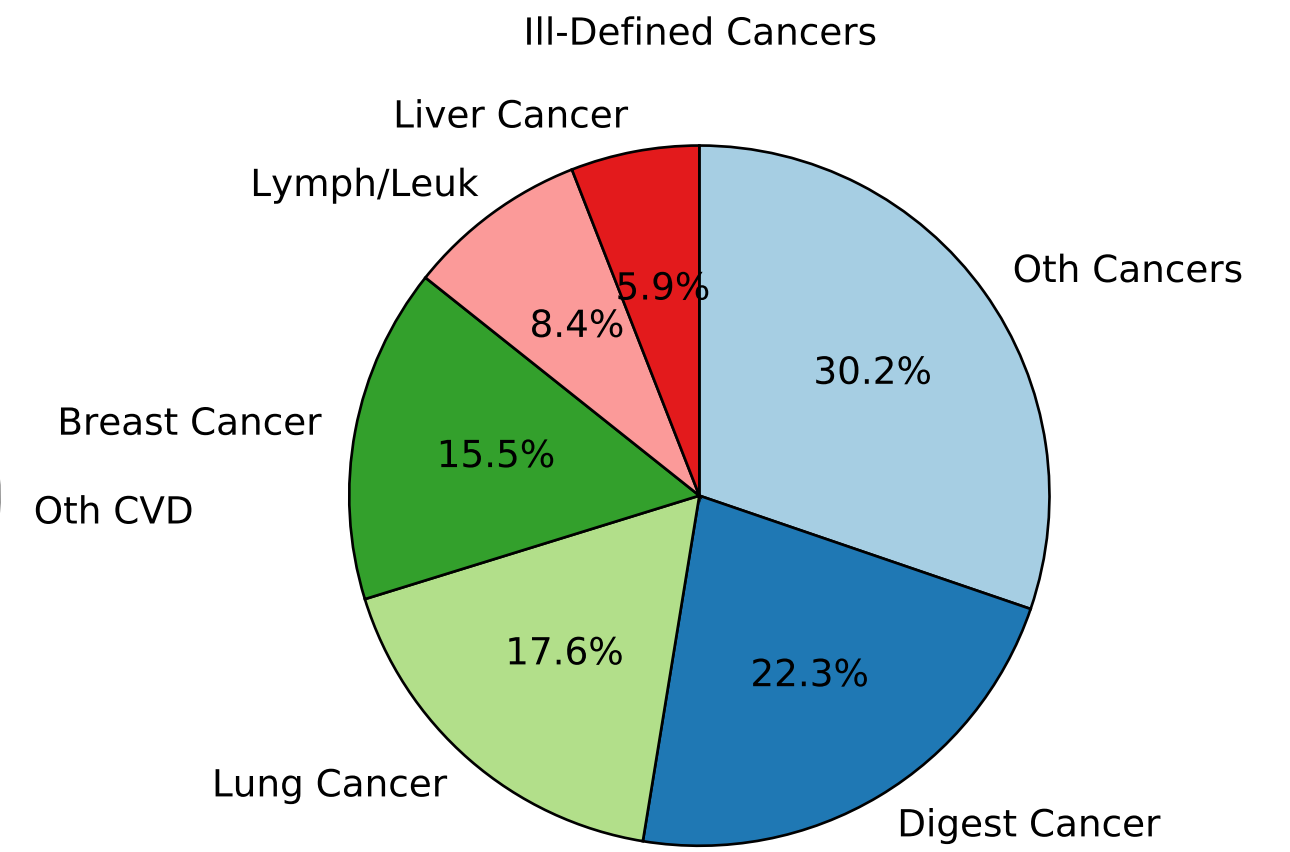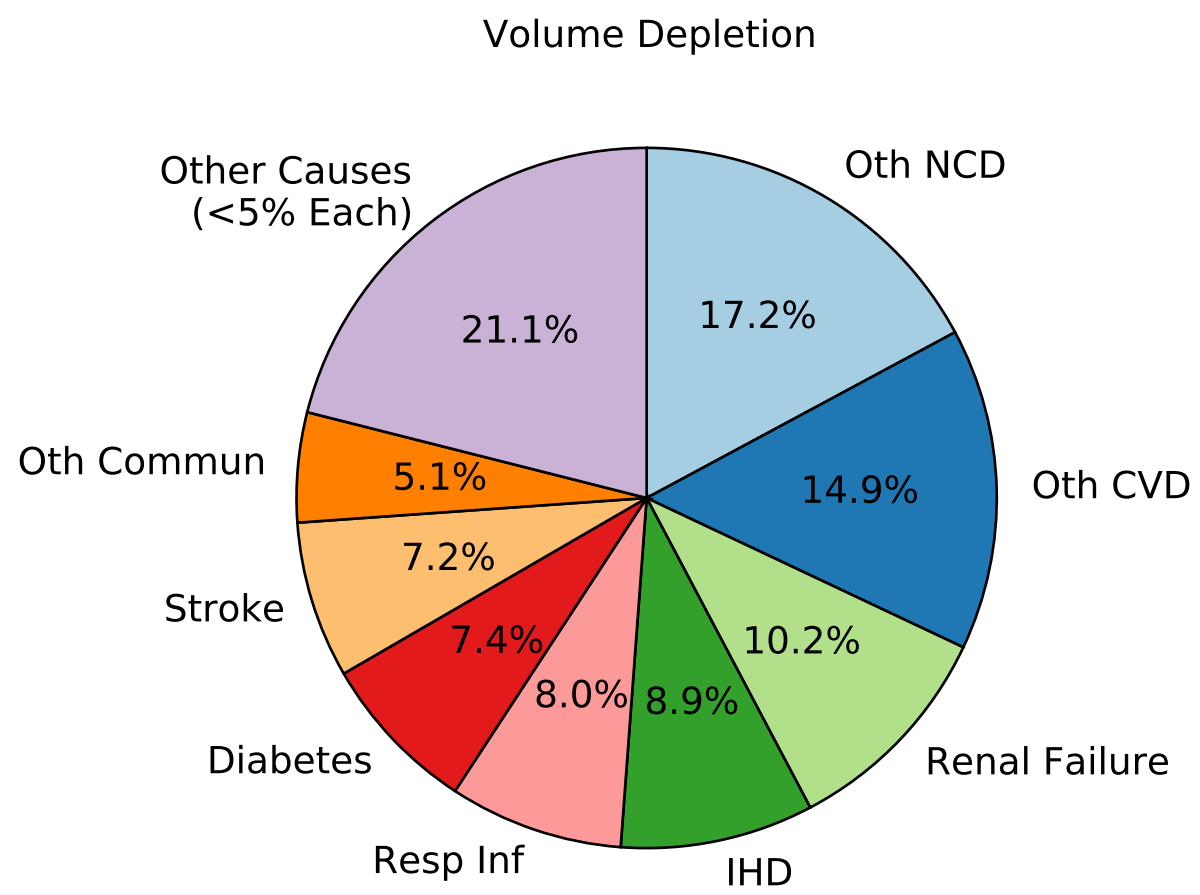

Ill-Defined

Ill-Defined Cardiovascular Disease

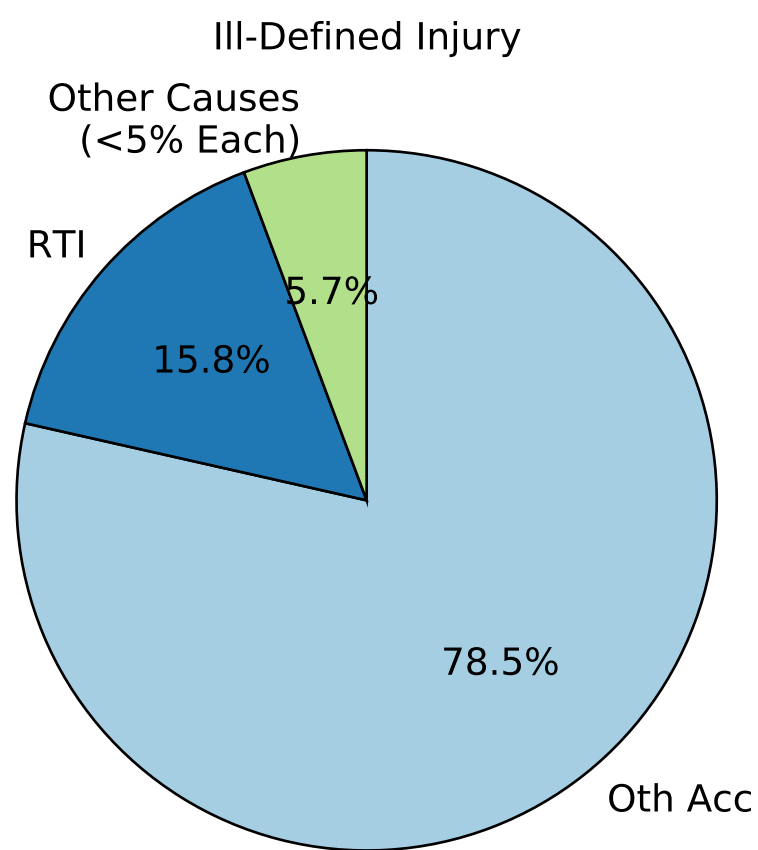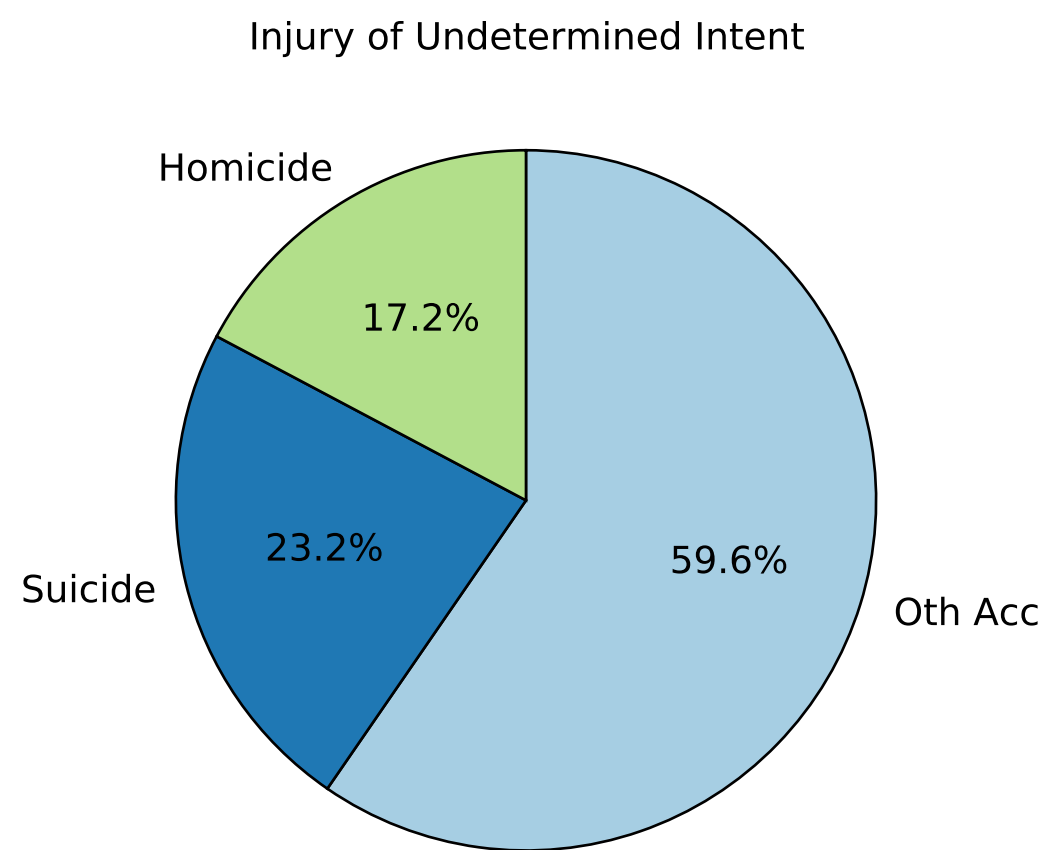

Ill-Defined Infectious Disease



ICD 9  
Female, Age 80

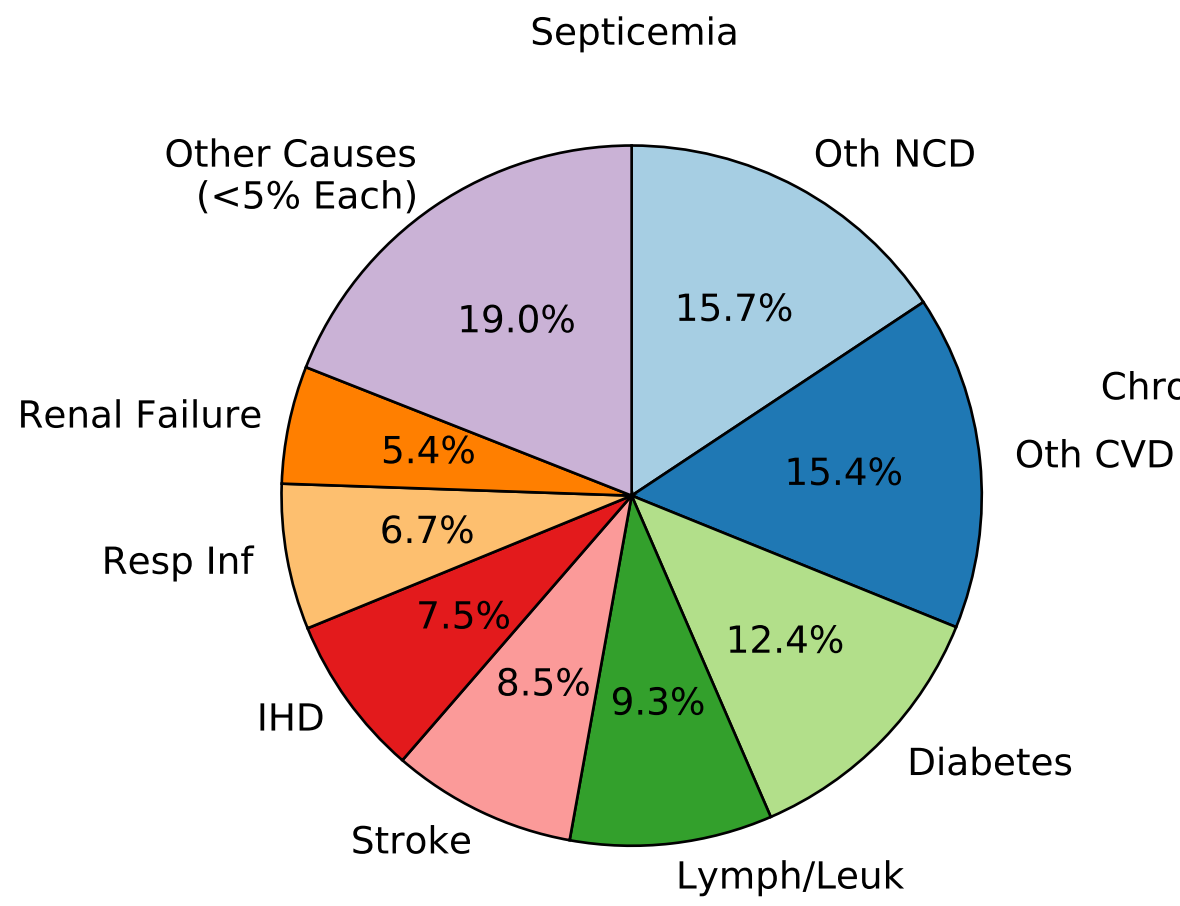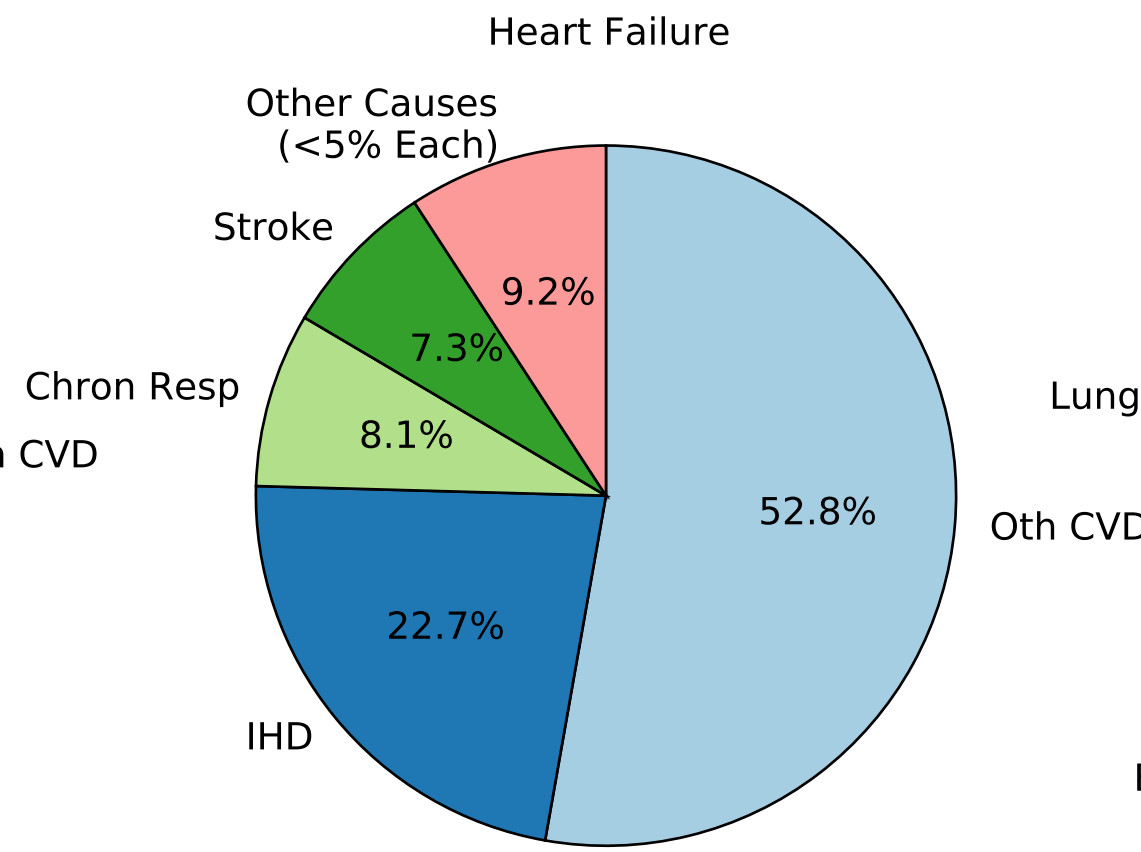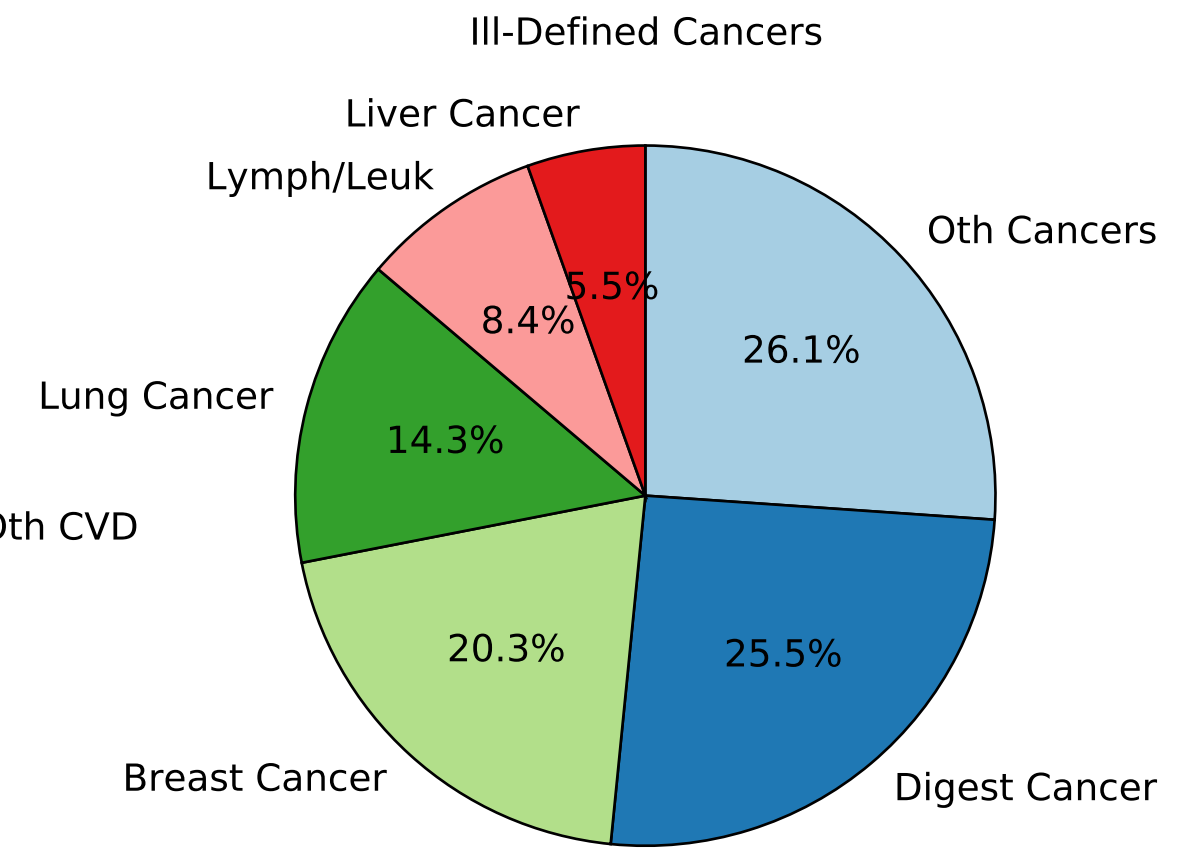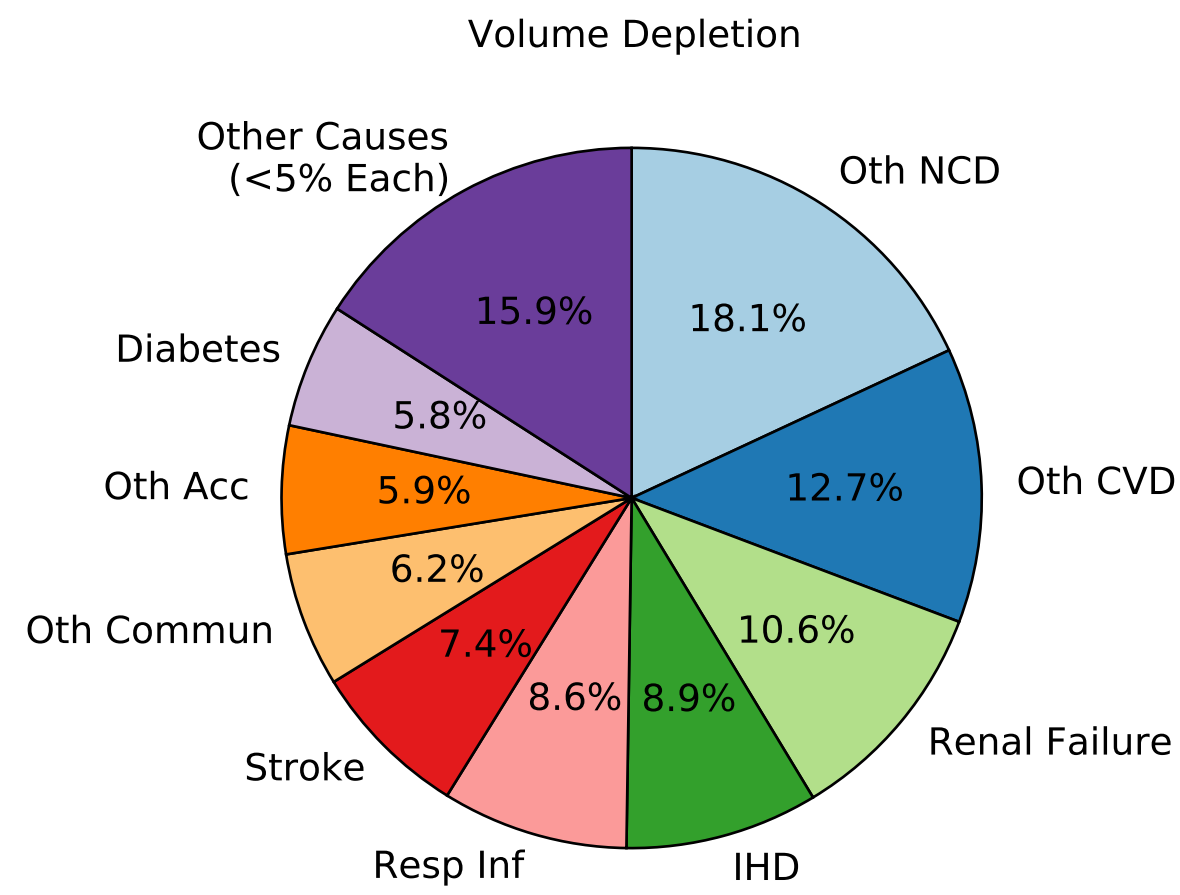

III-Defined

III-Defined Cardiovascular Disease

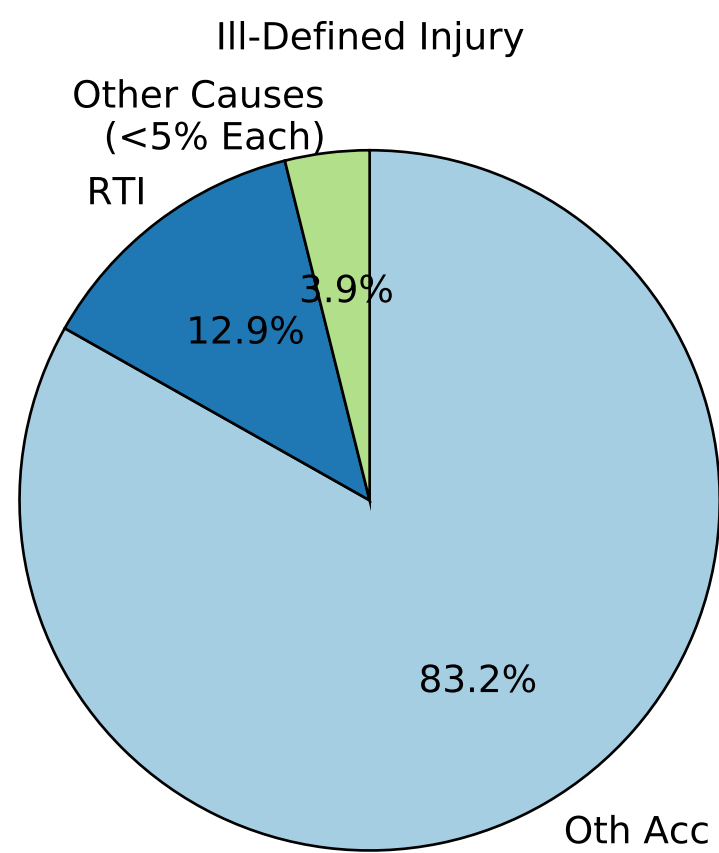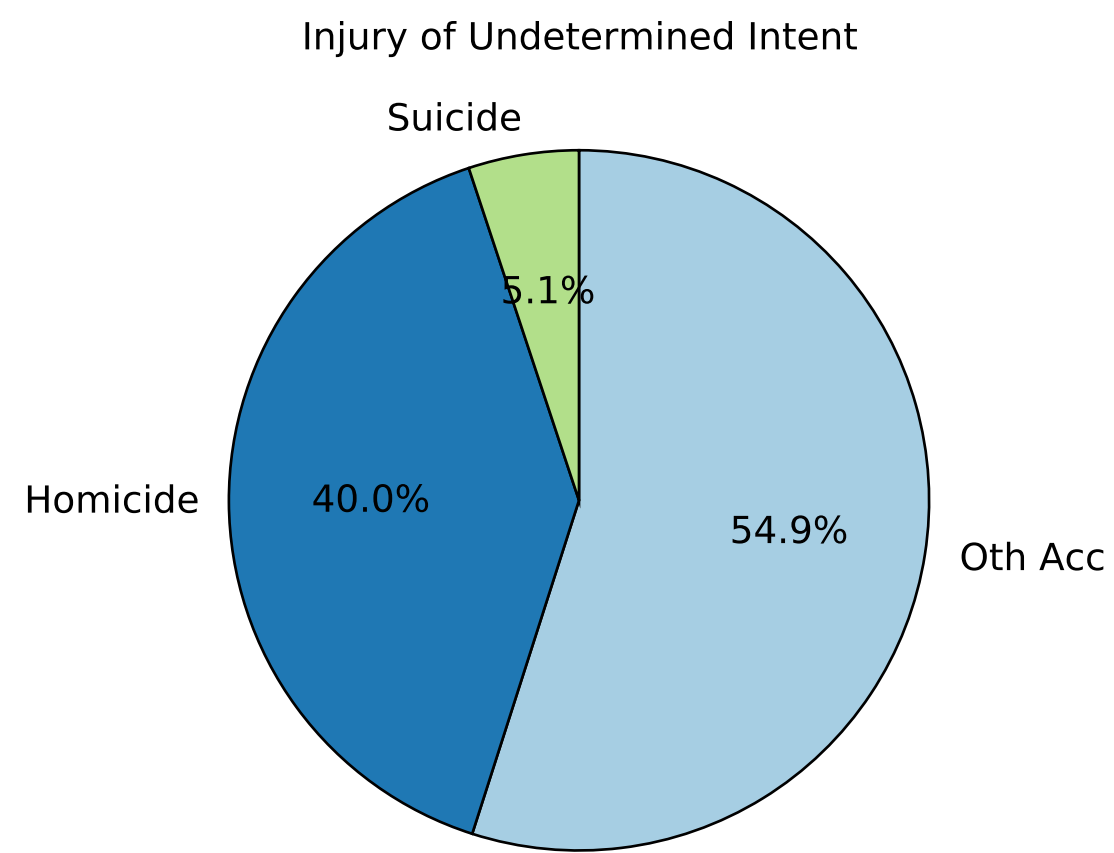

III-Defined Infectious Disease

ICD 9  
Female, Age 85

Septicemia

Heart Failure

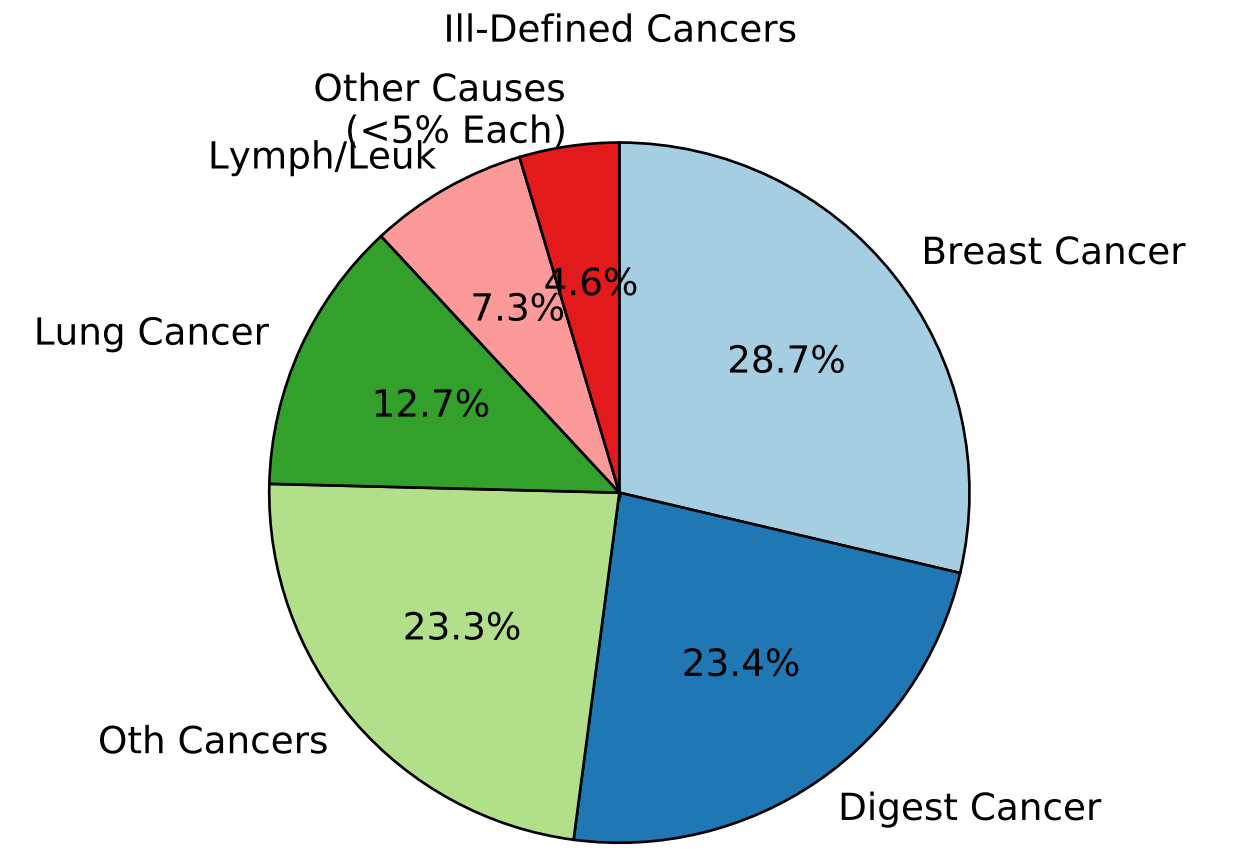

Volume Depletion

III-Defined

III-Defined Cardiovascular Disease

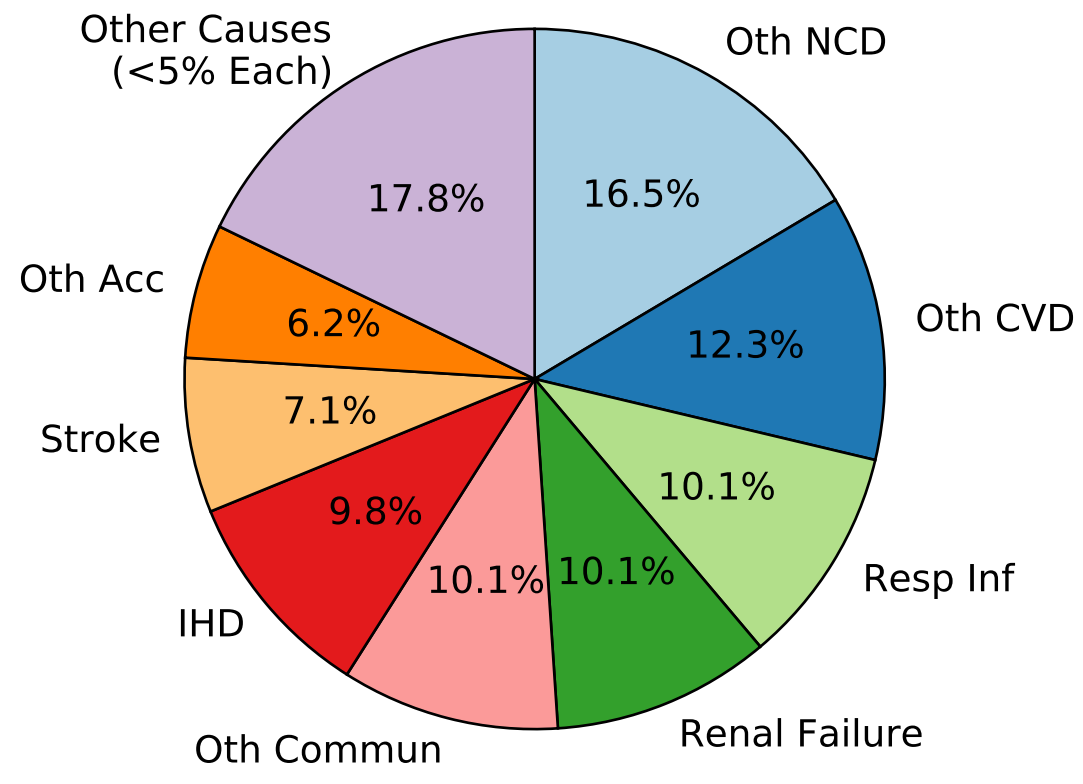

III-Defined Injury

Injury of Undetermined Intent

III-Defined Infectious Disease

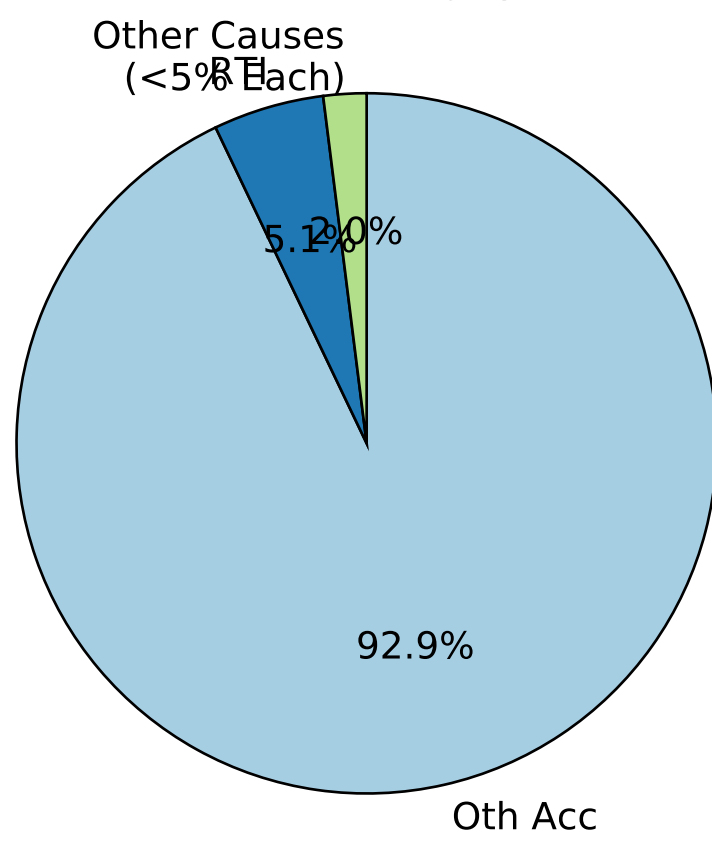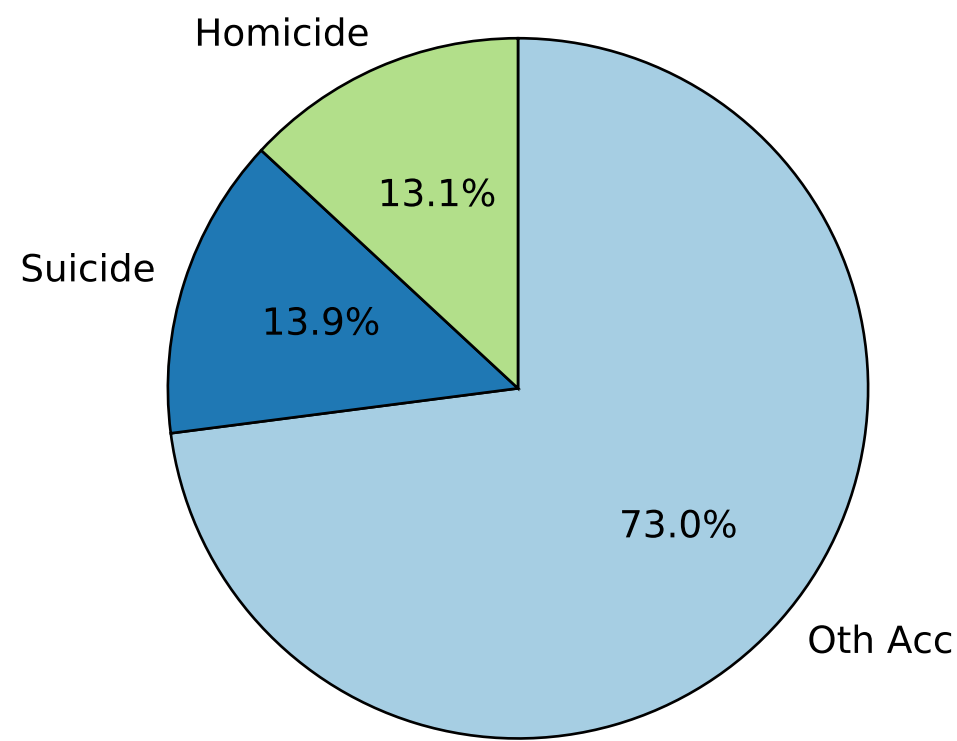

ICD 9  
Male, Age 0

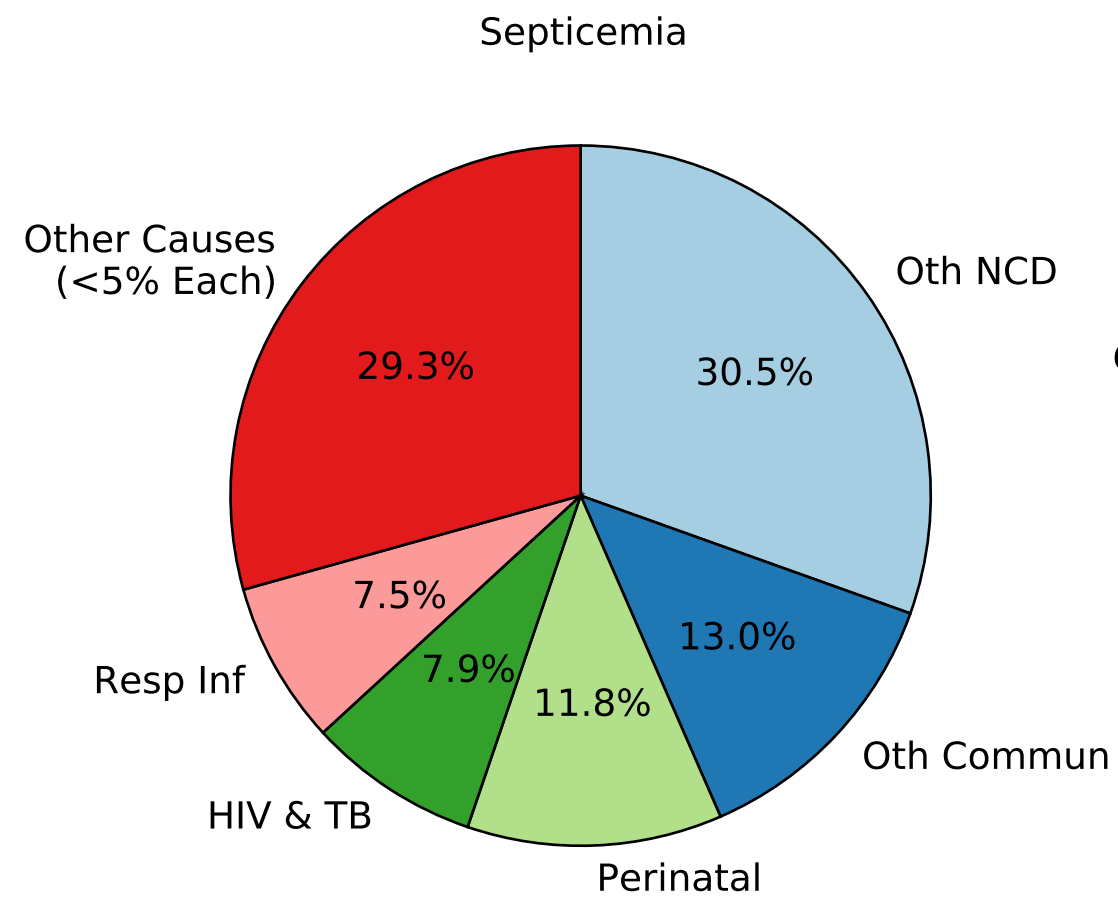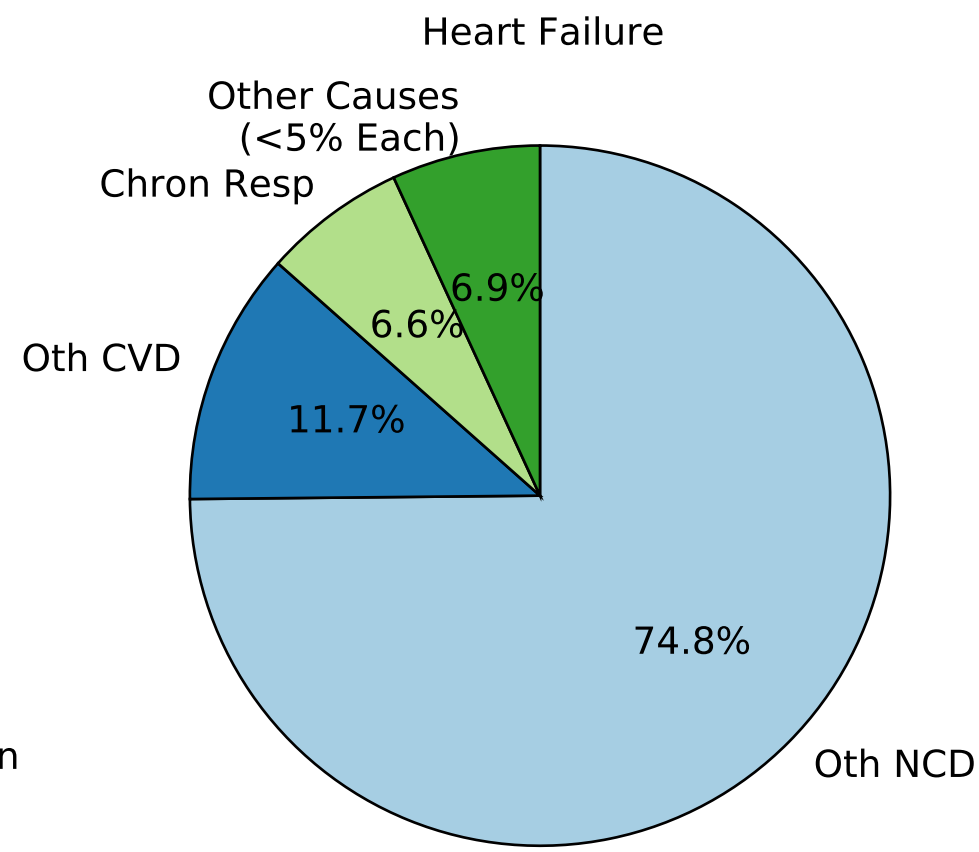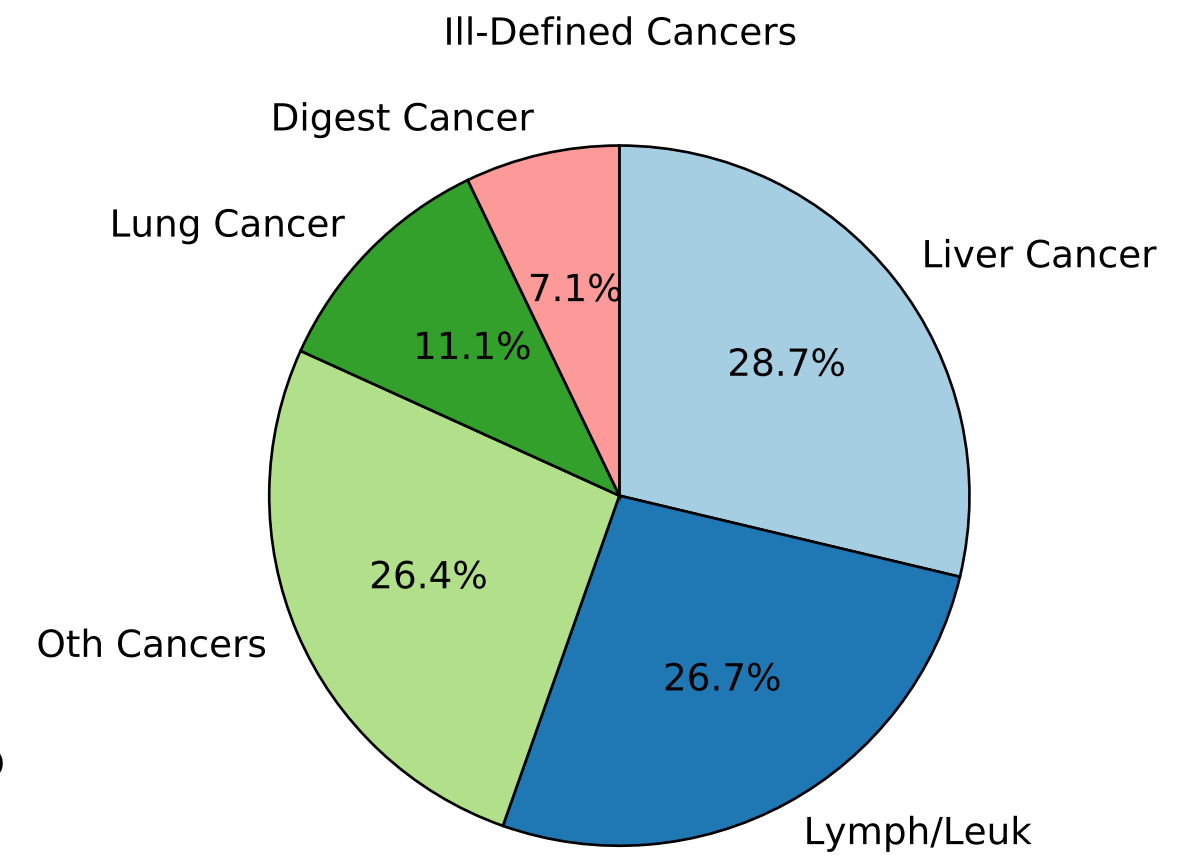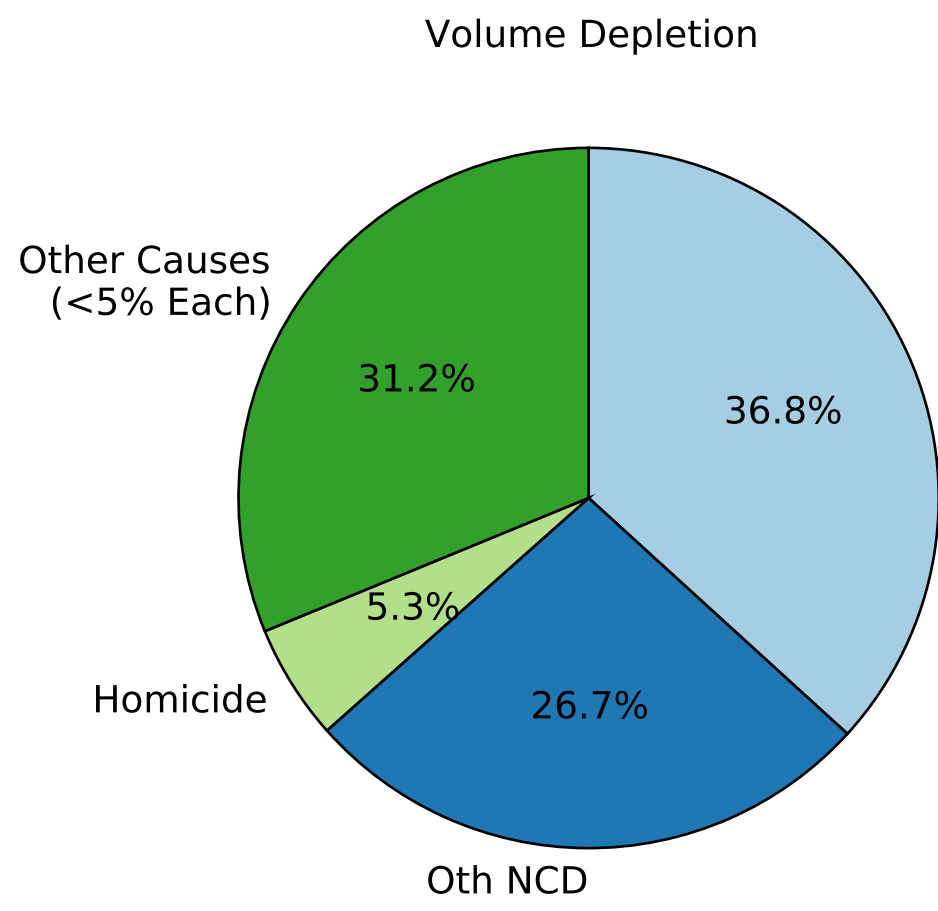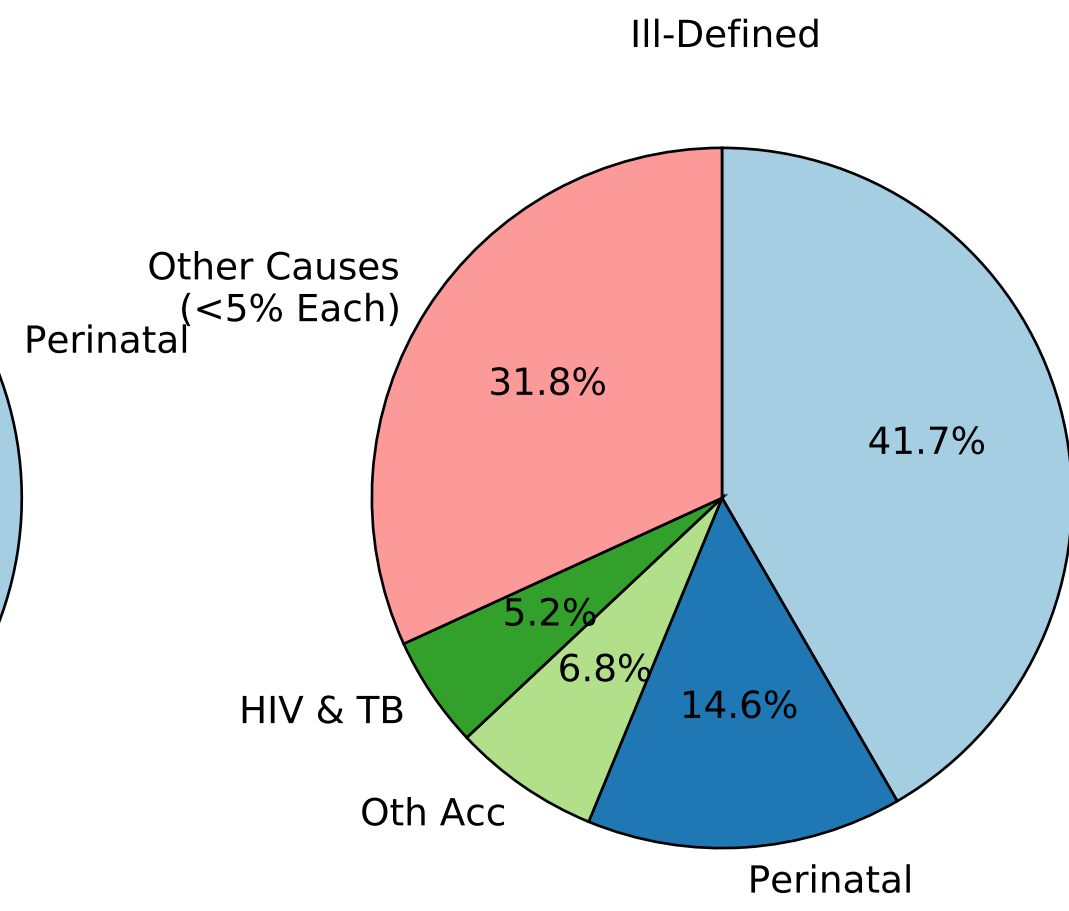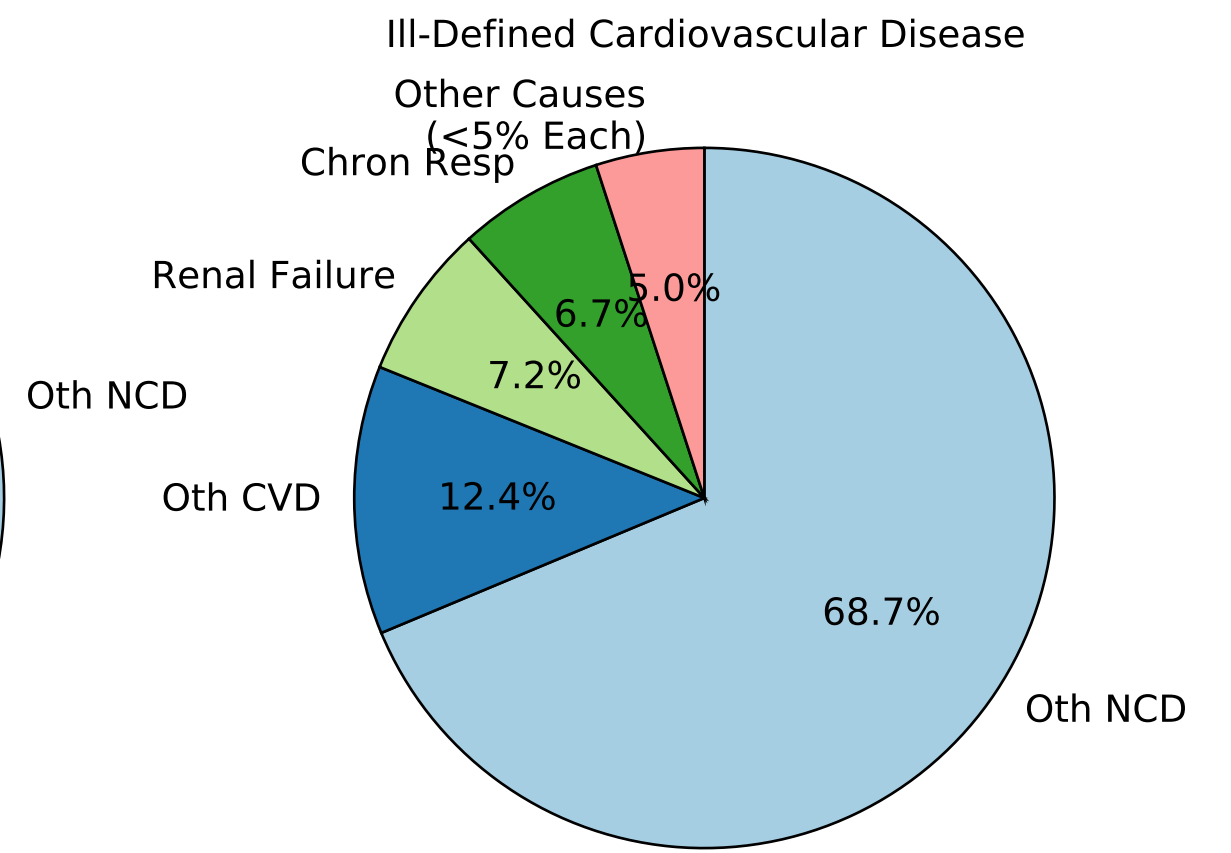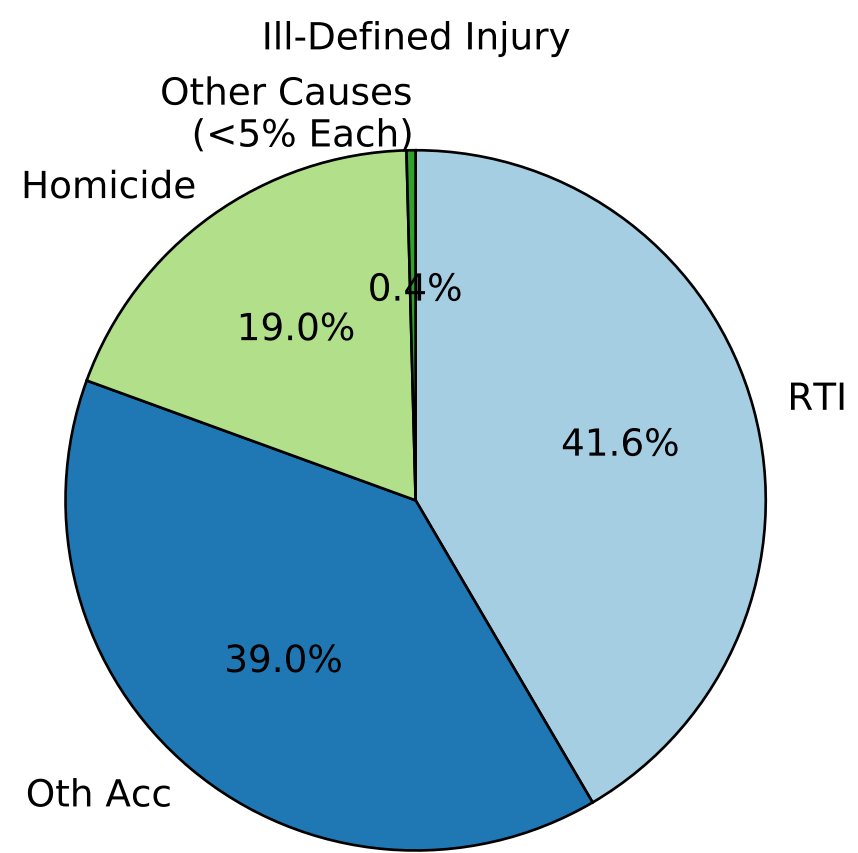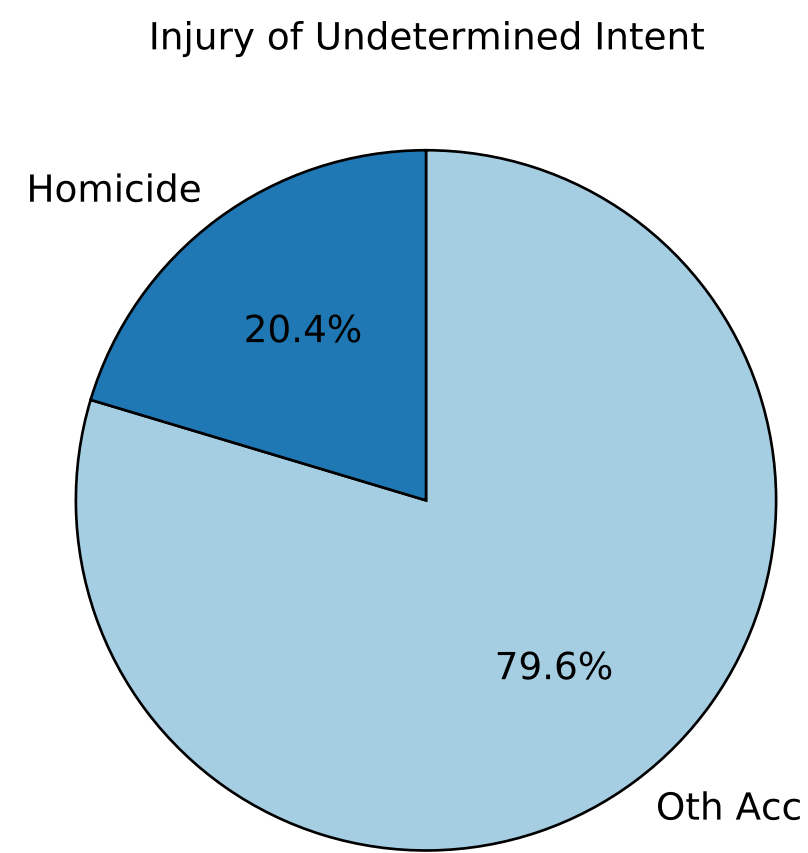

Ill-Defined Infectious Disease

ICD 9  
Male, Age 5

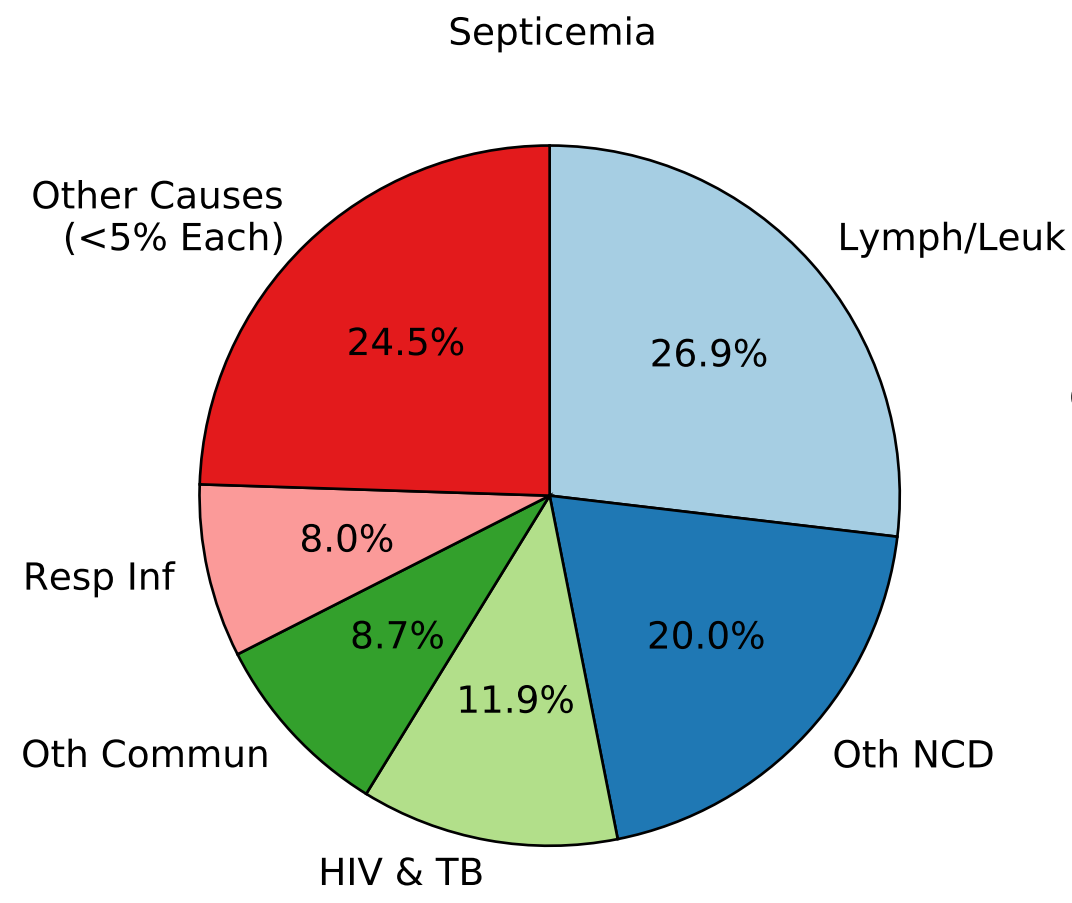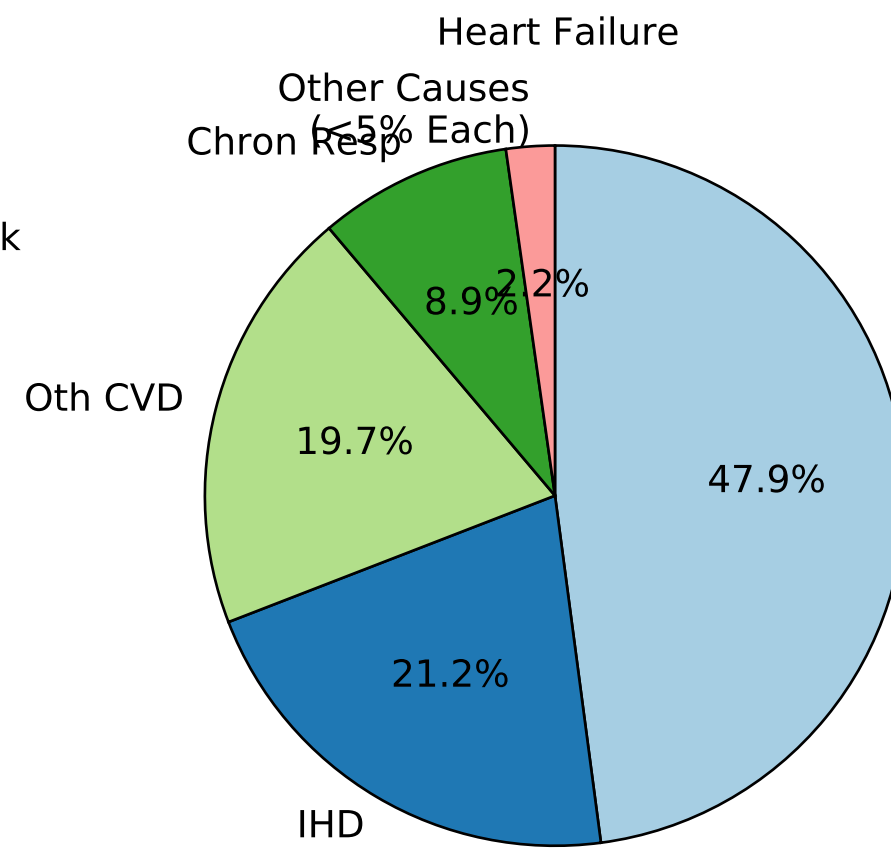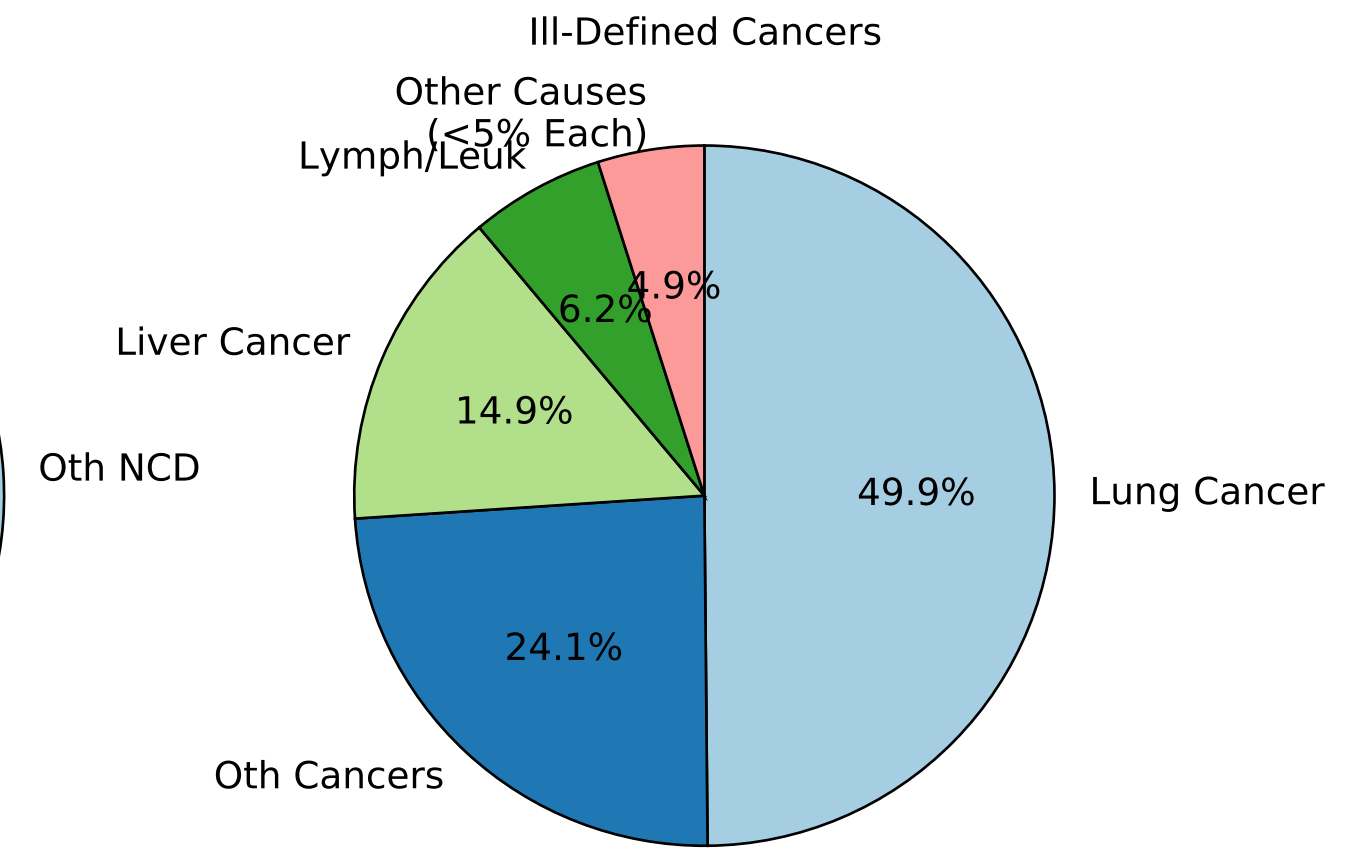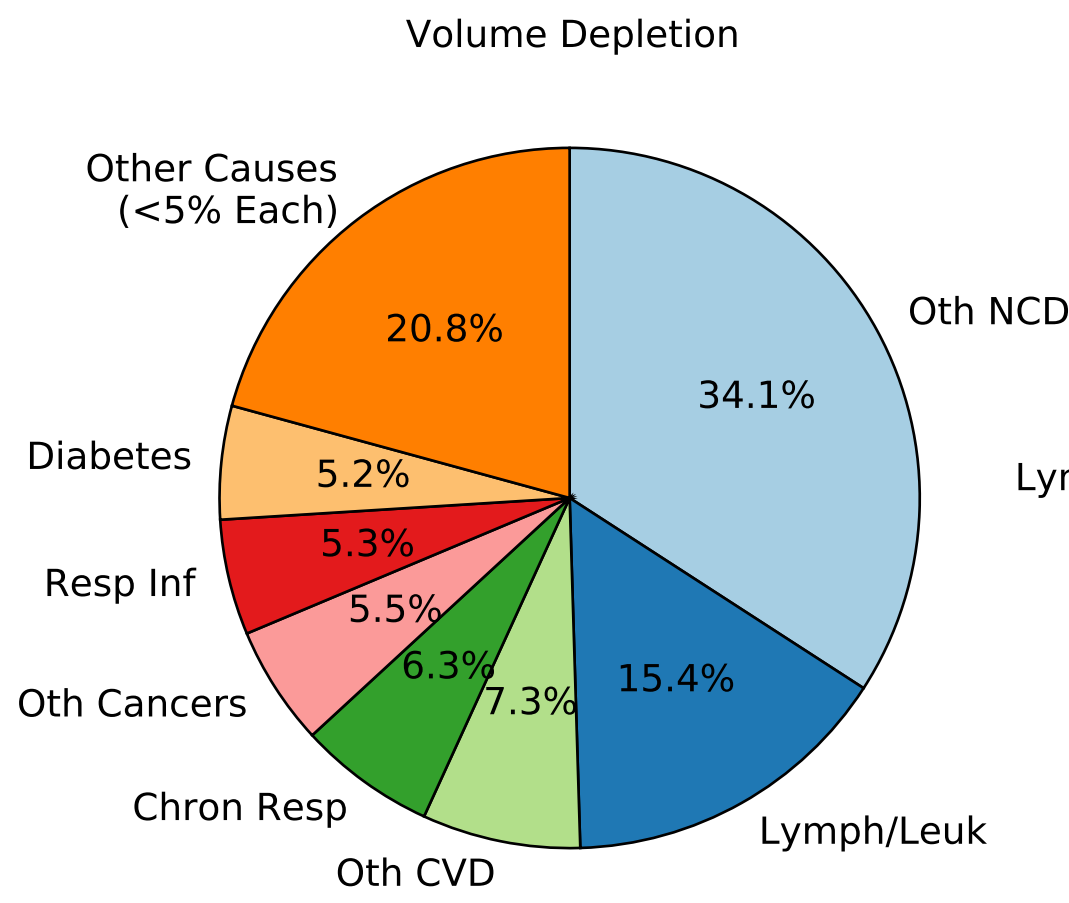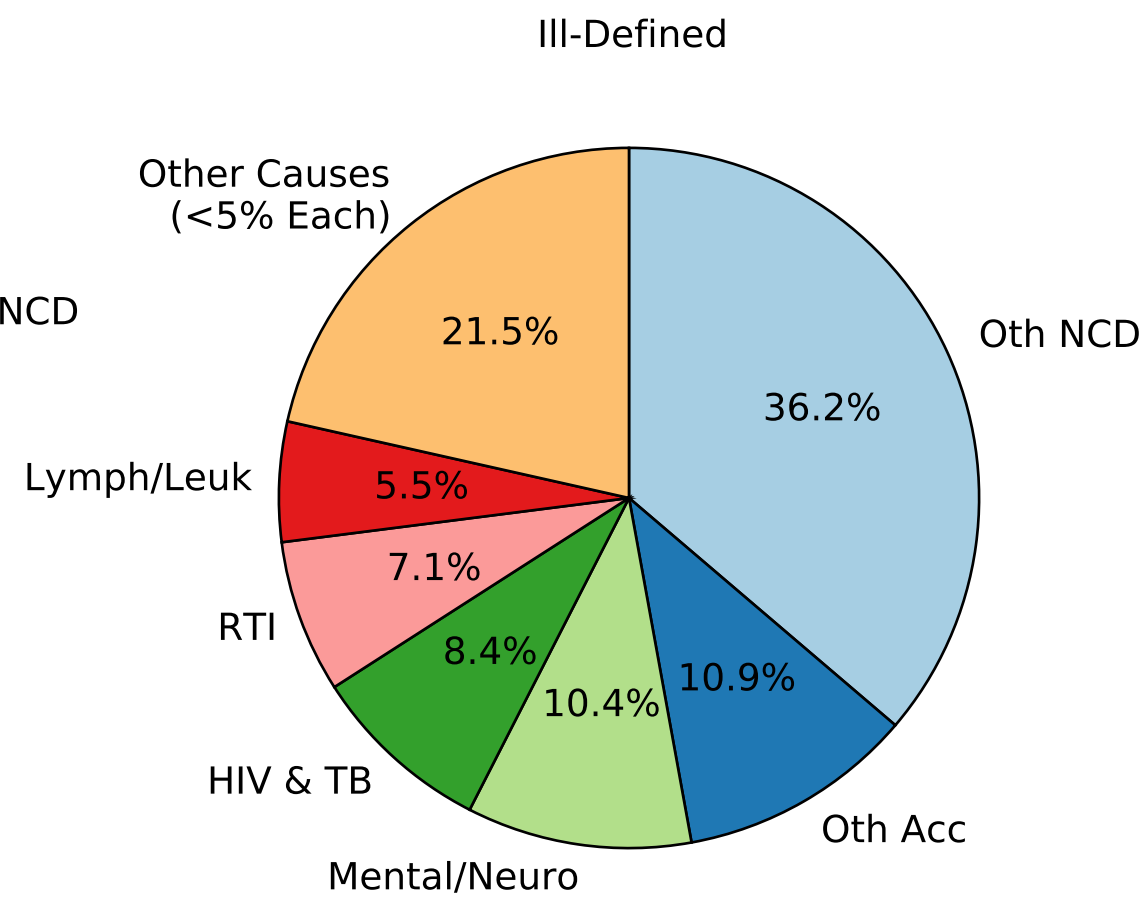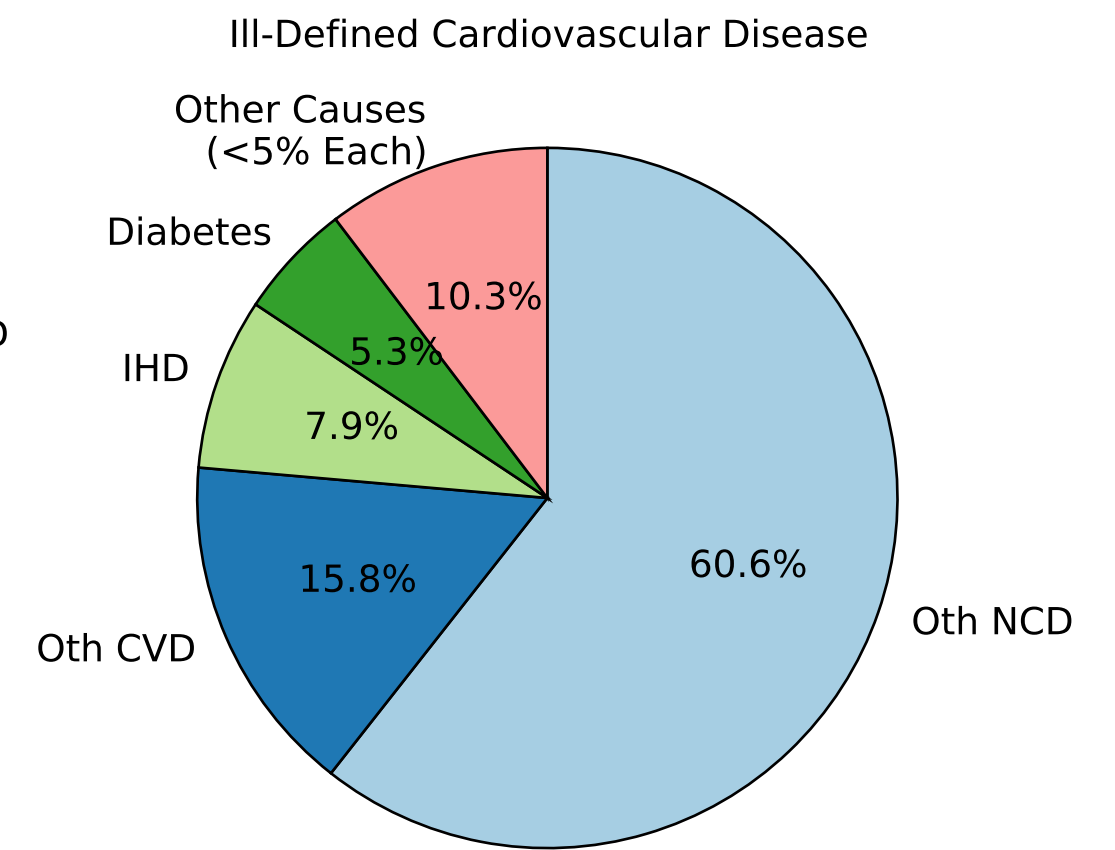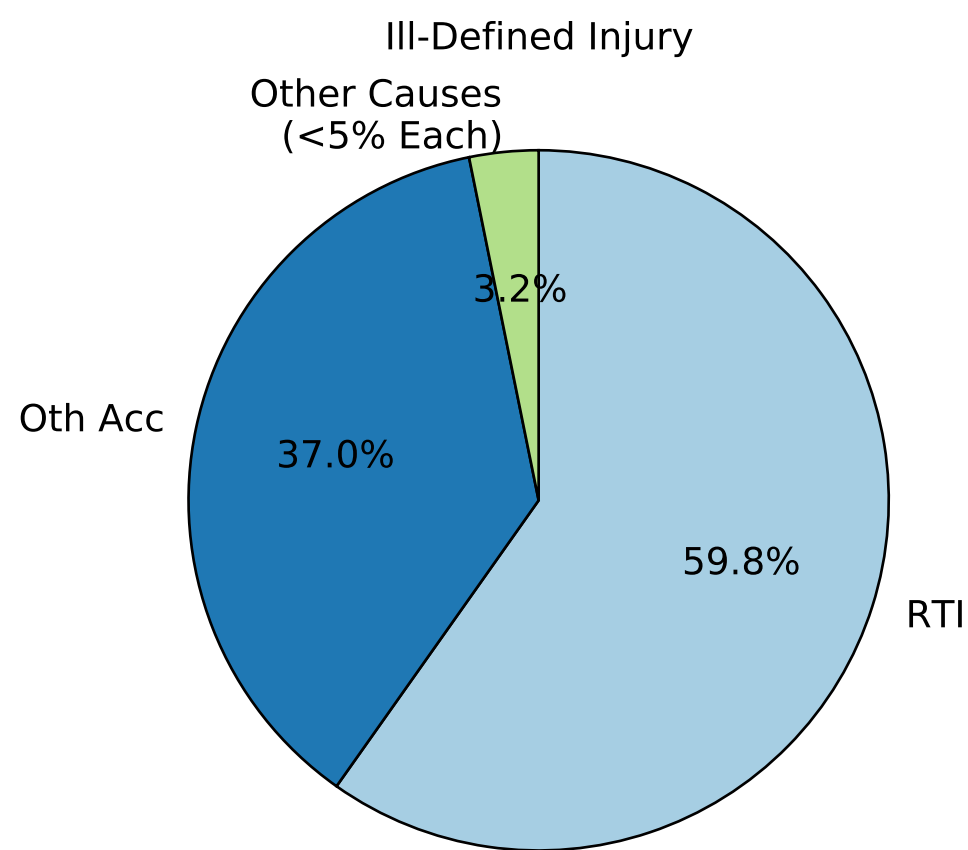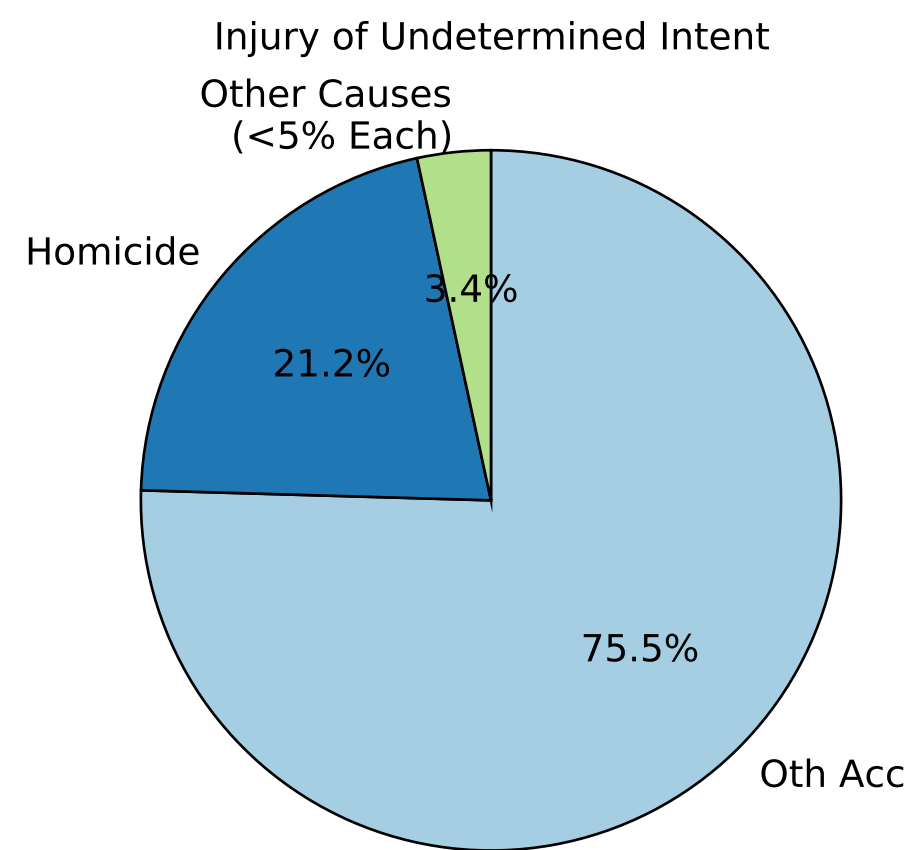

### Ill-Defined Infectious Disease

ICD 9  
Male, Age 10

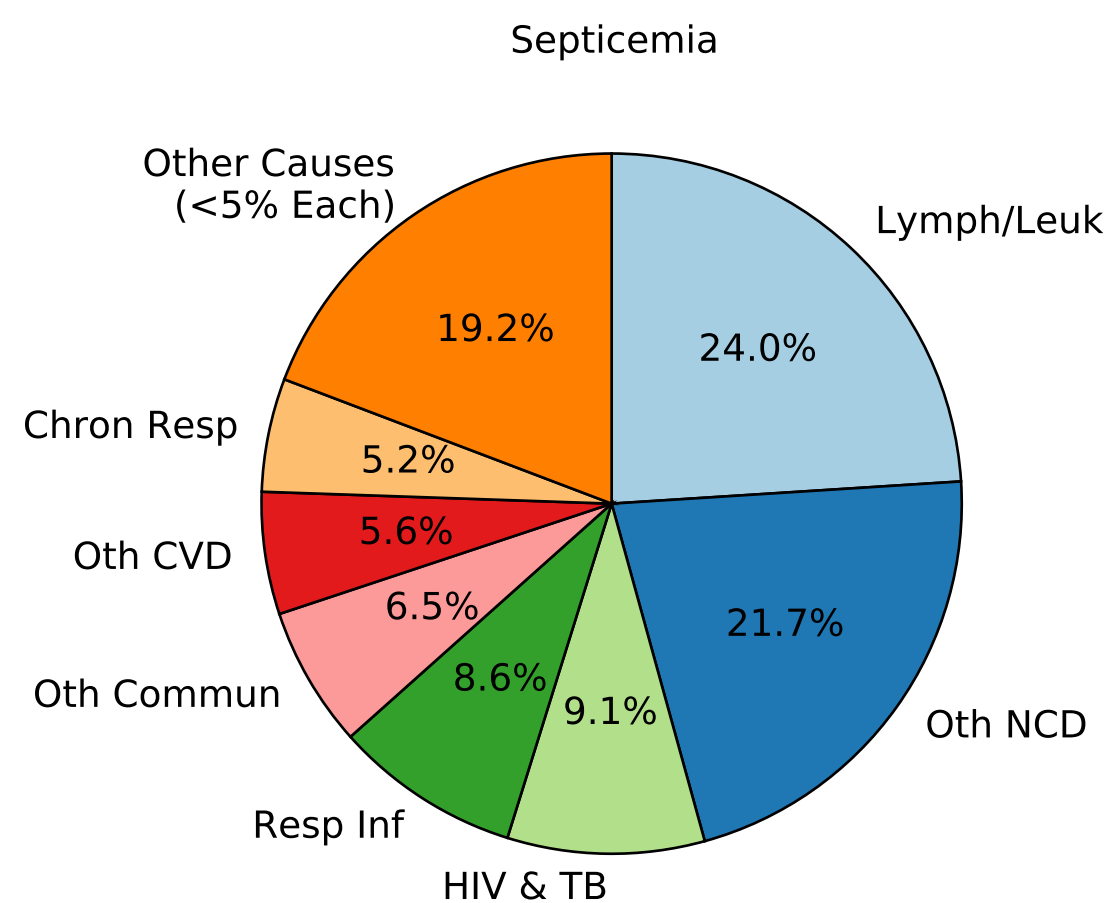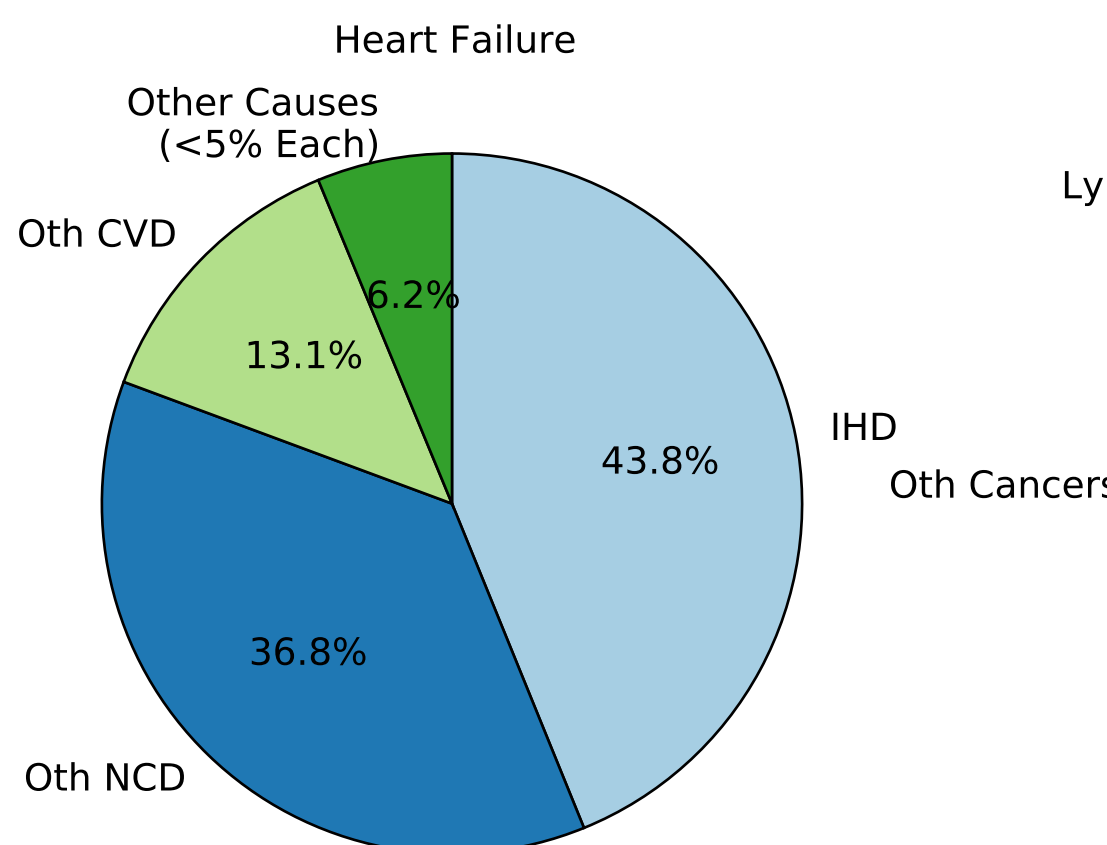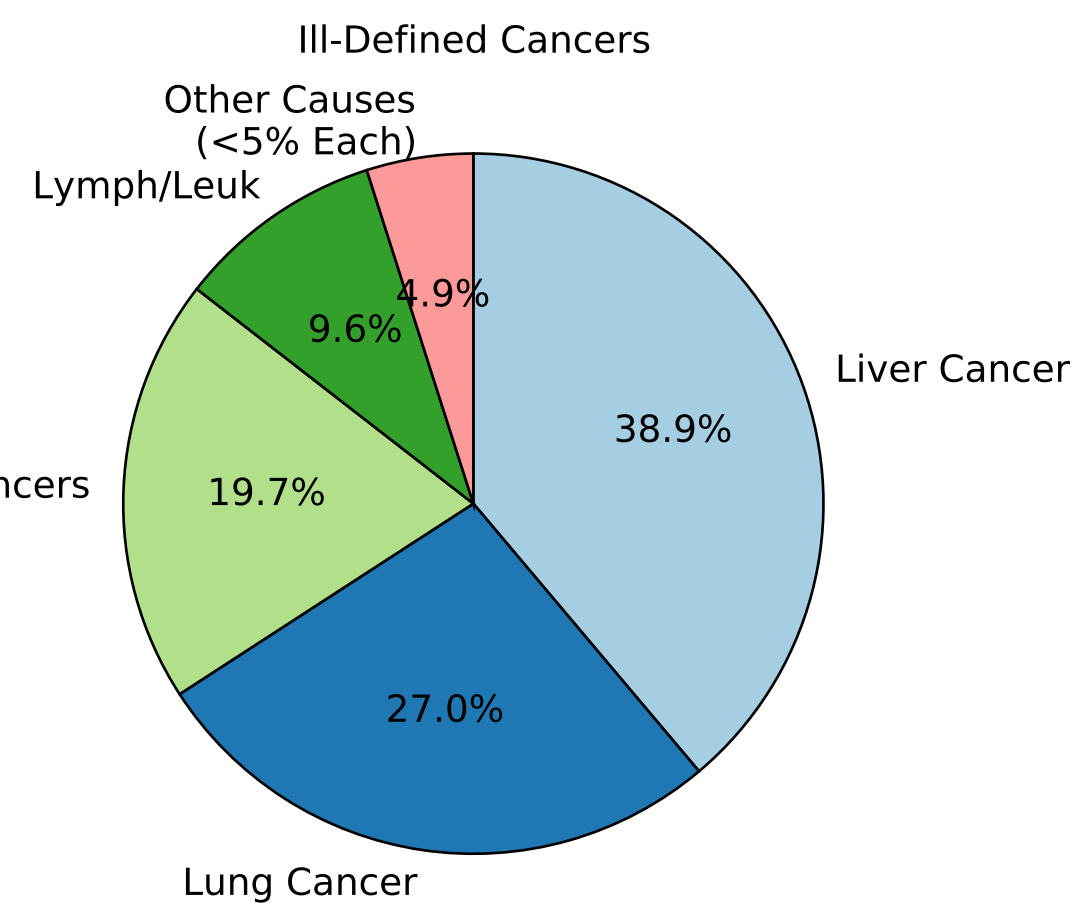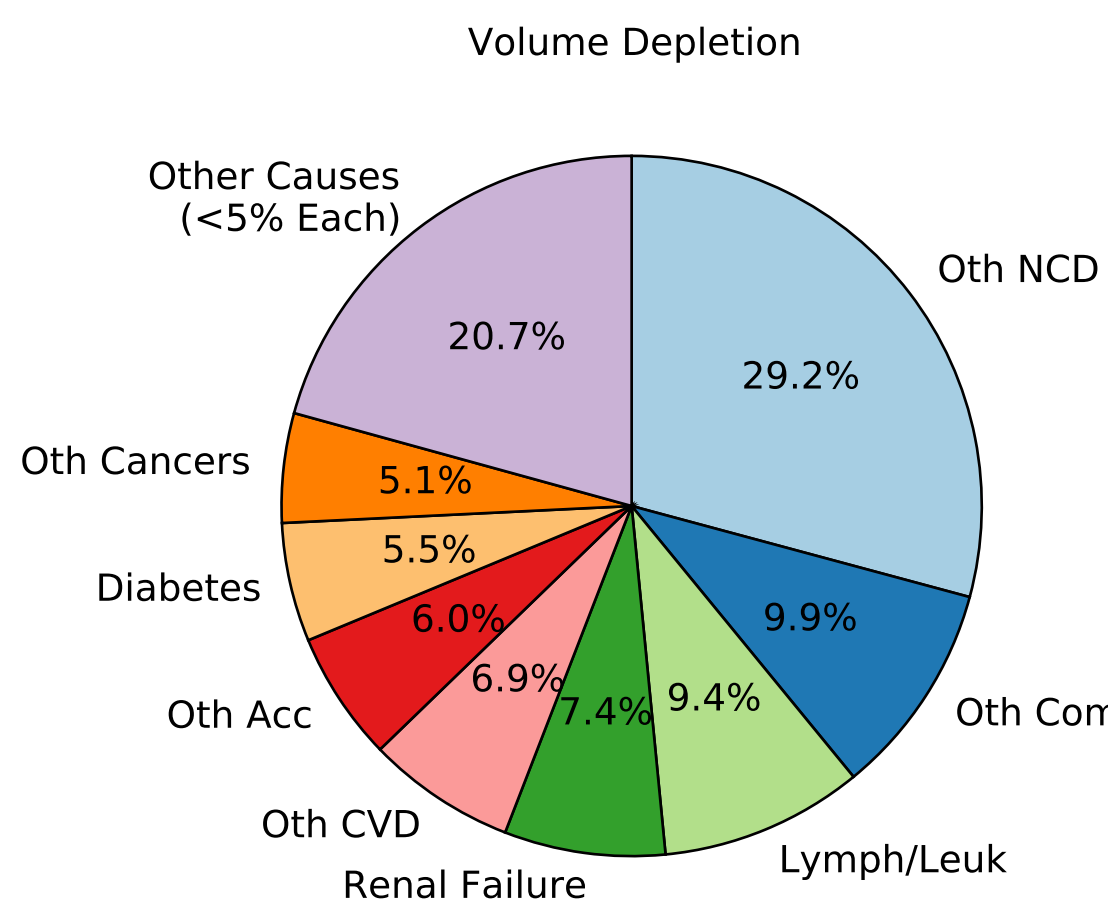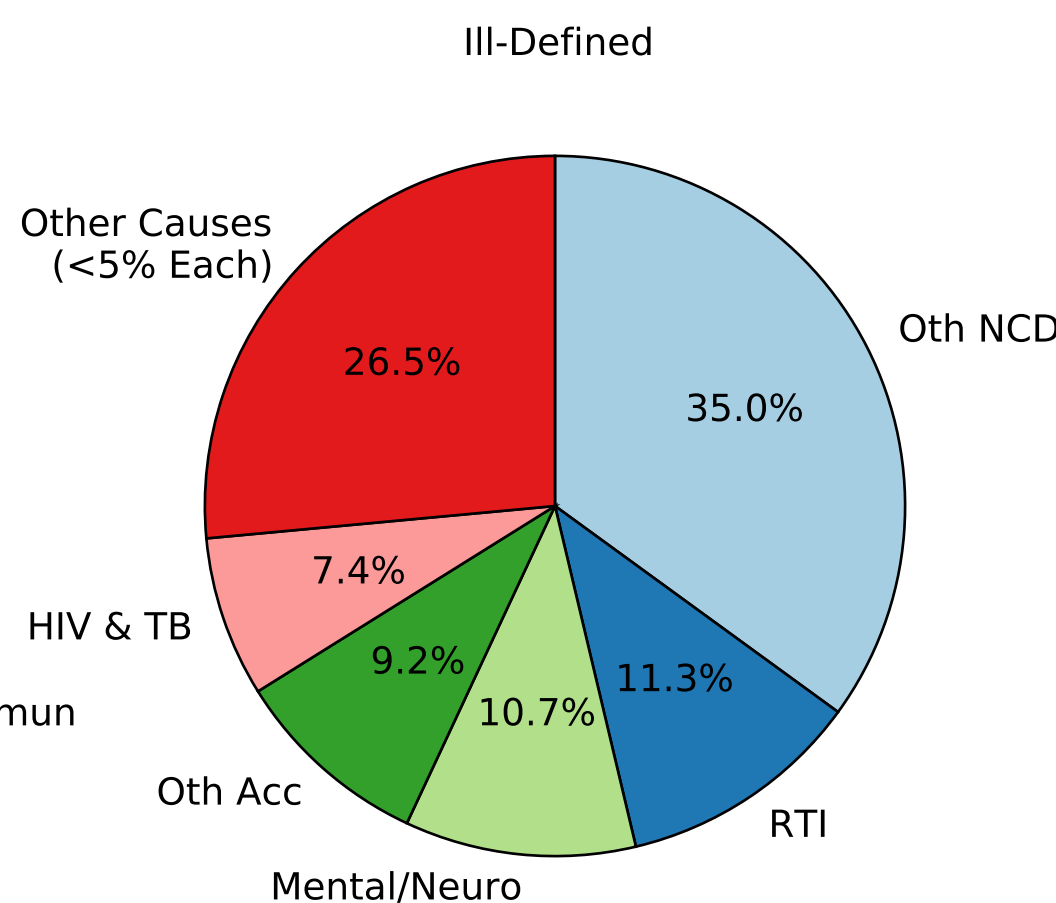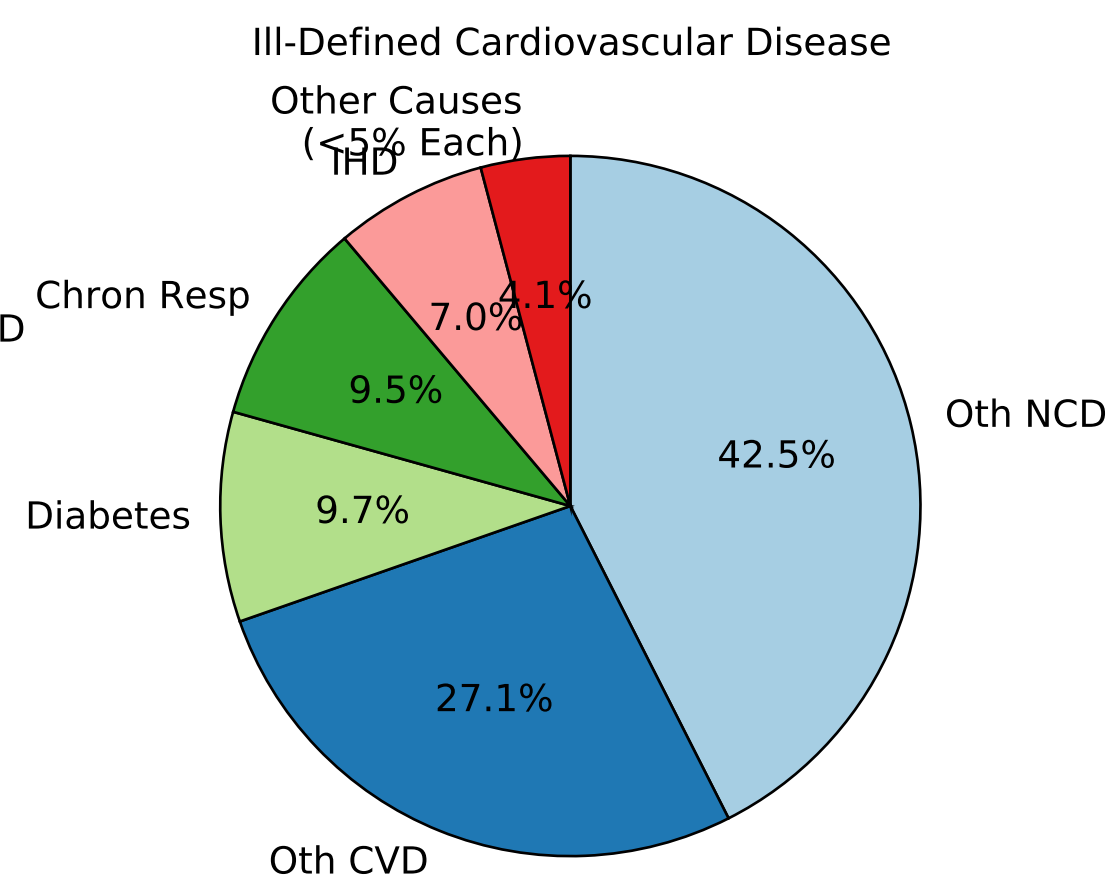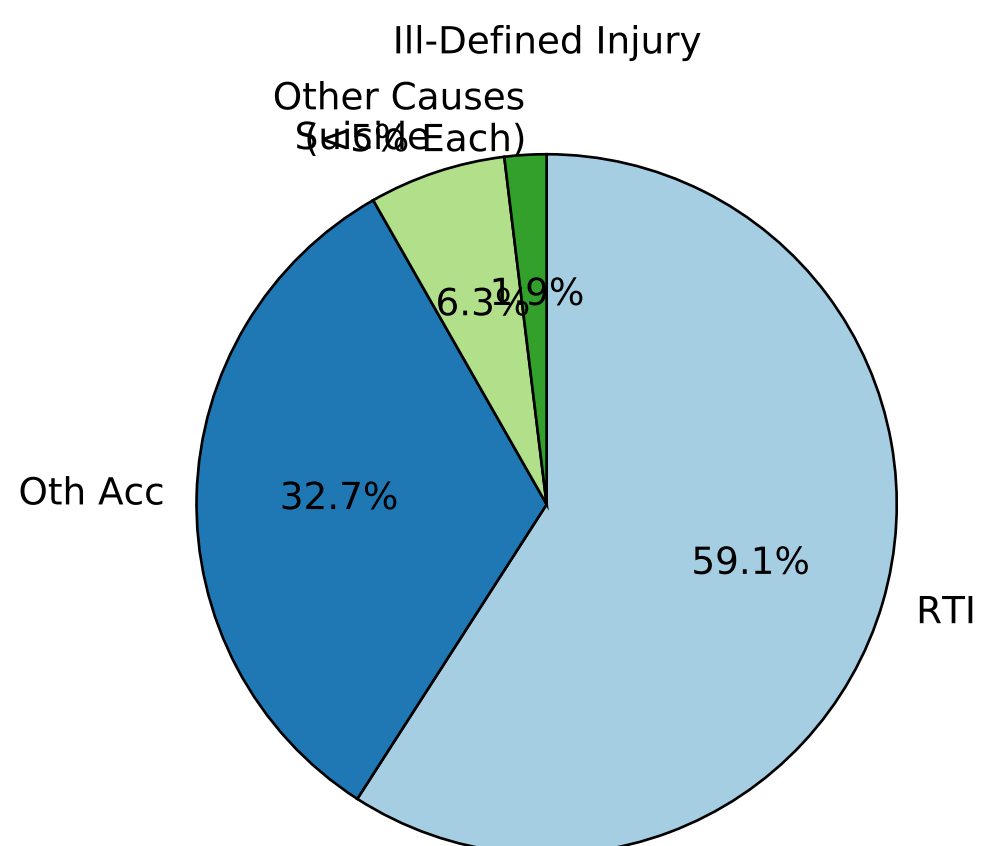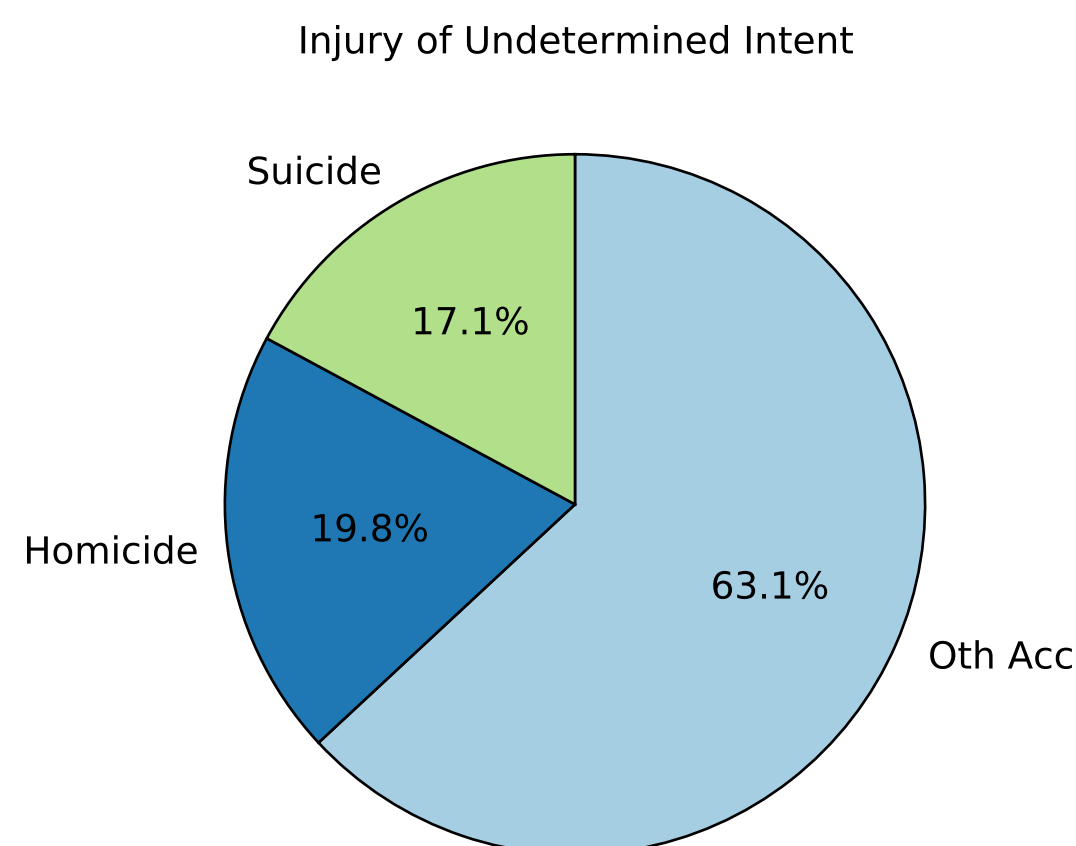

III-Defined Infectious Disease

ICD 9  
Male, Age 15

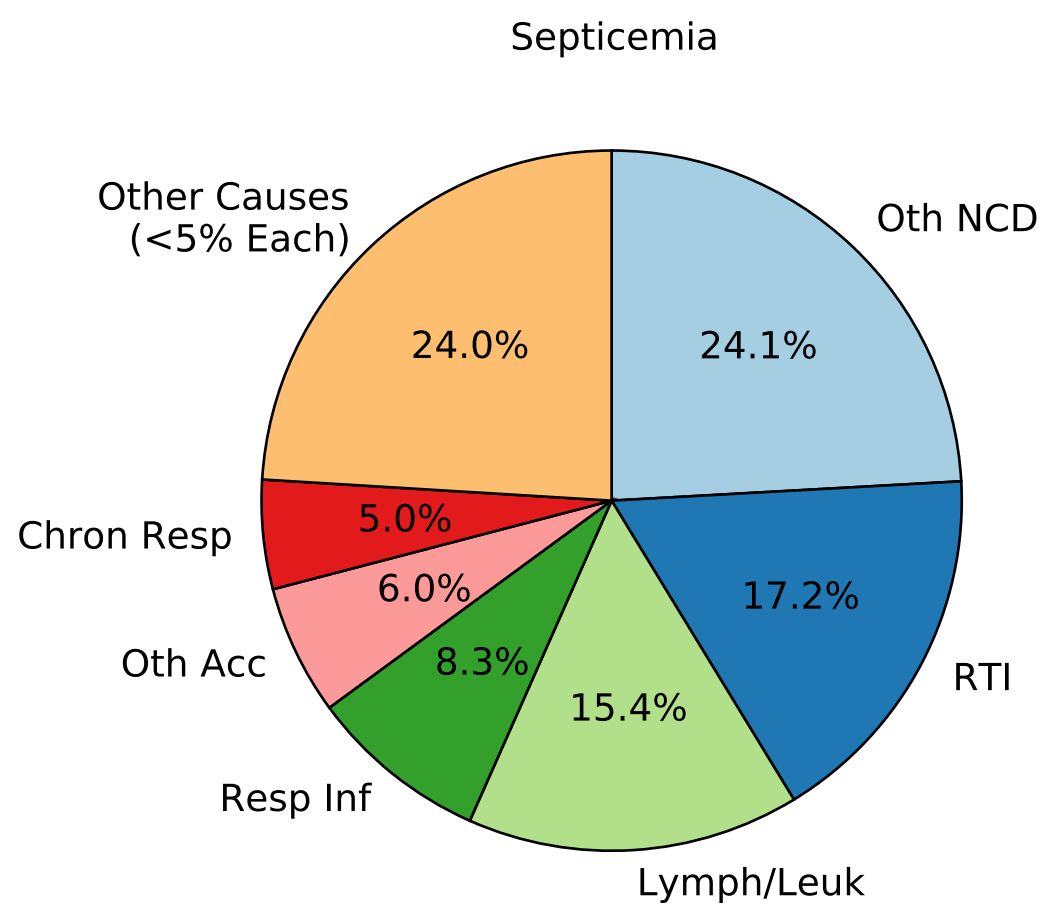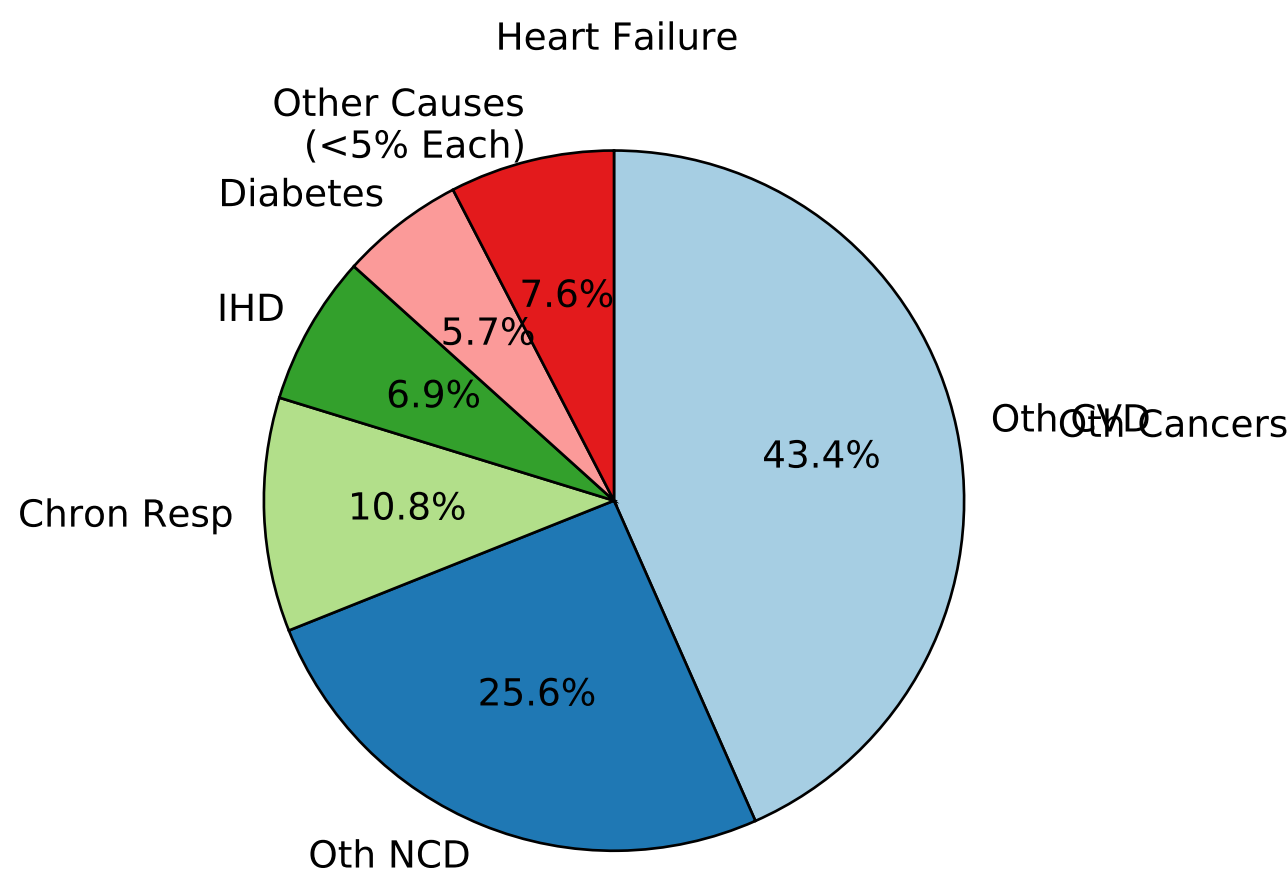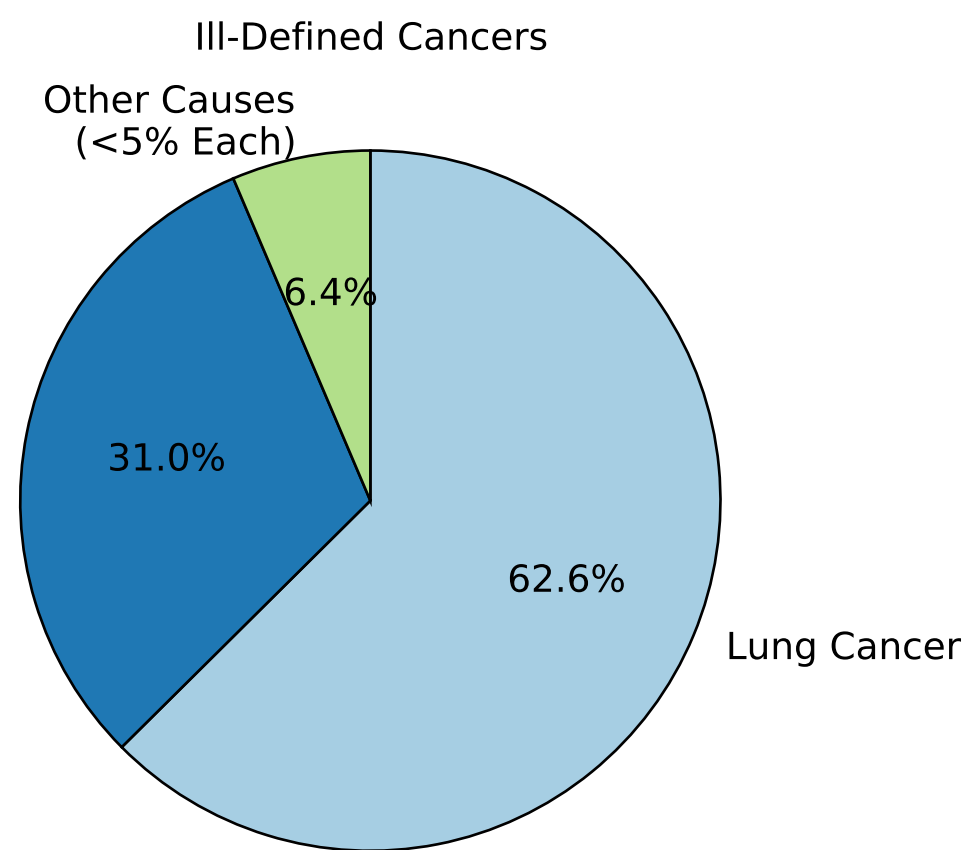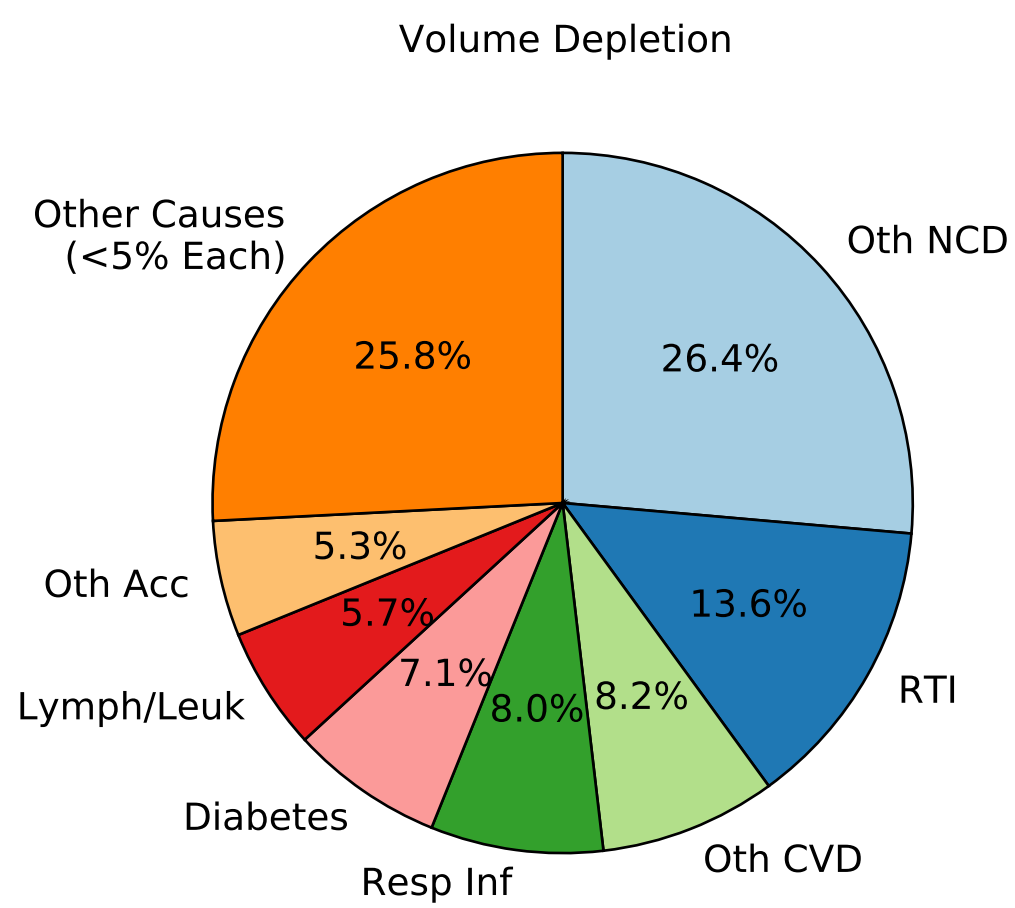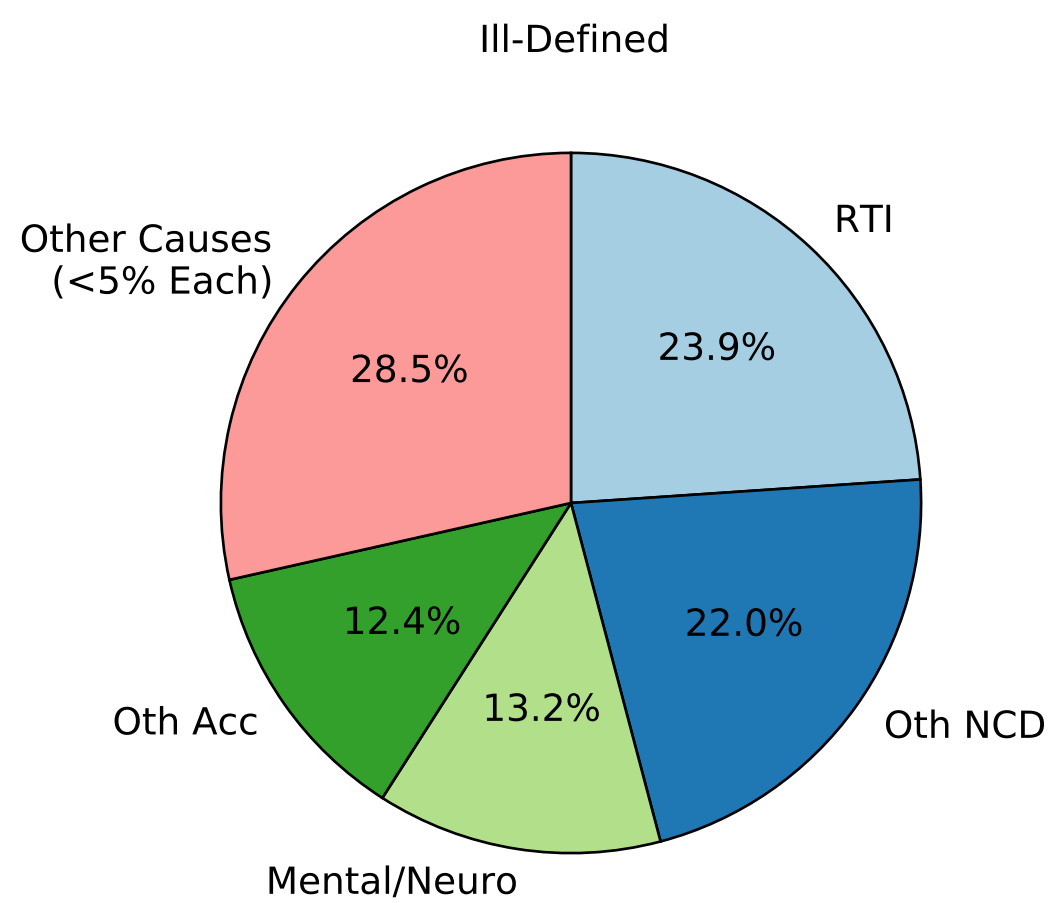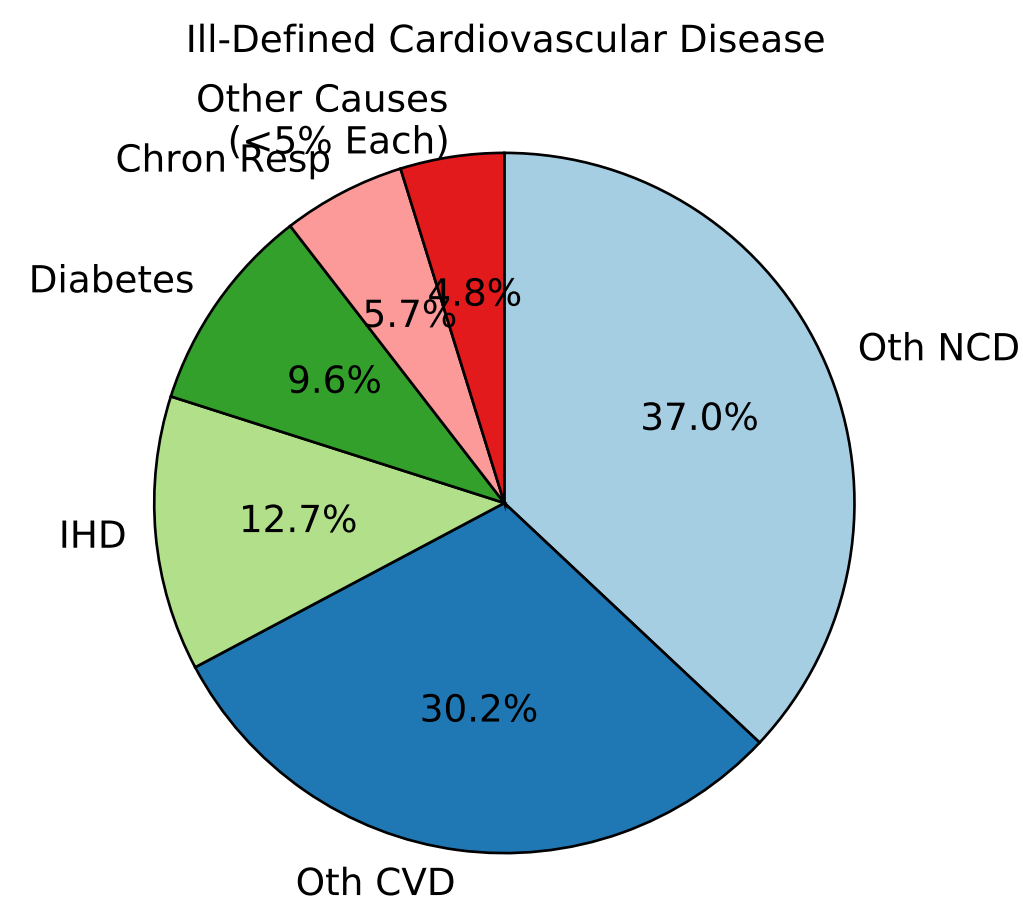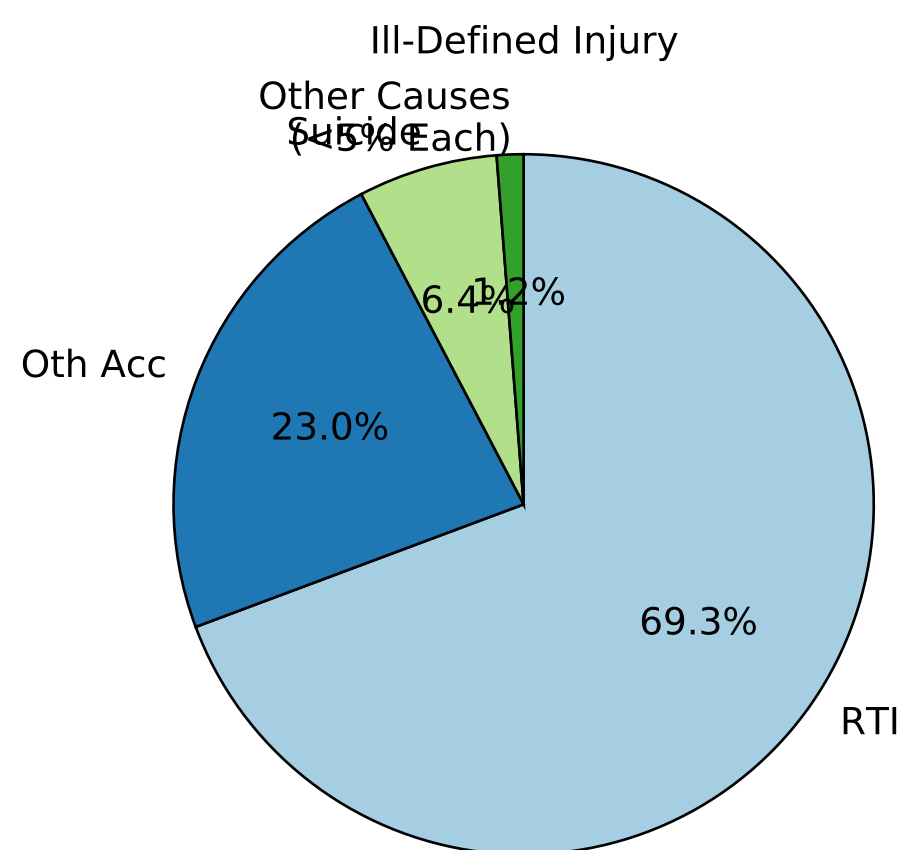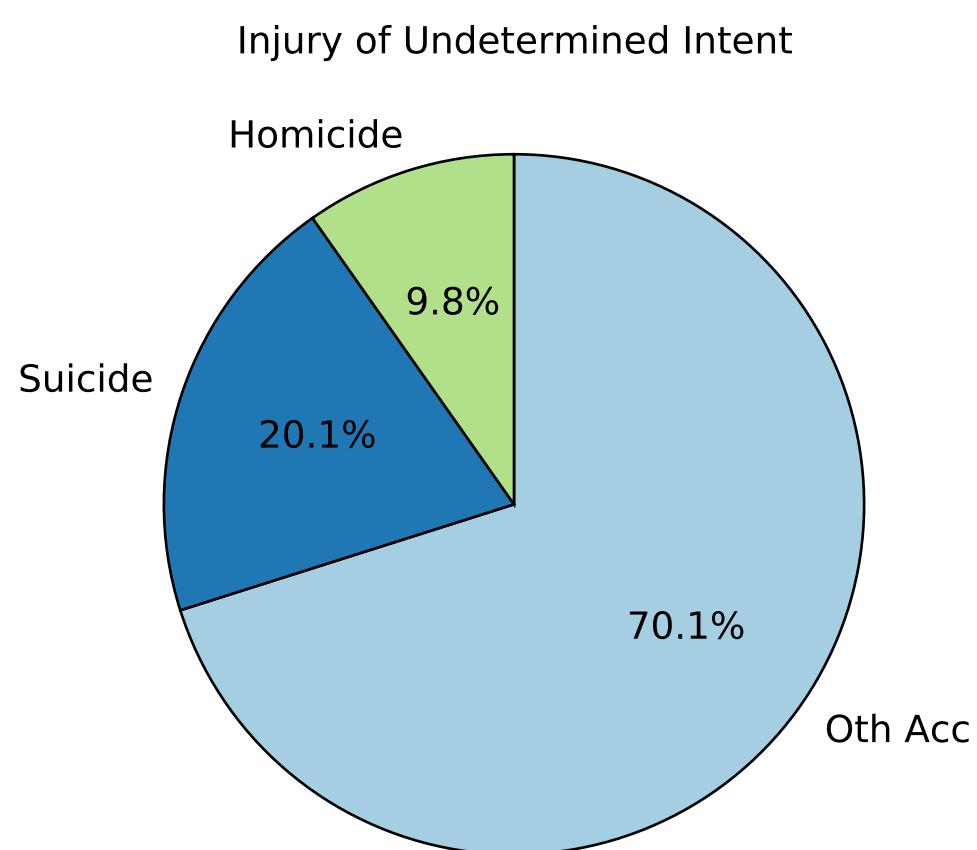

Ill-Defined Infectious Disease

ICD 9  
Male, Age 20

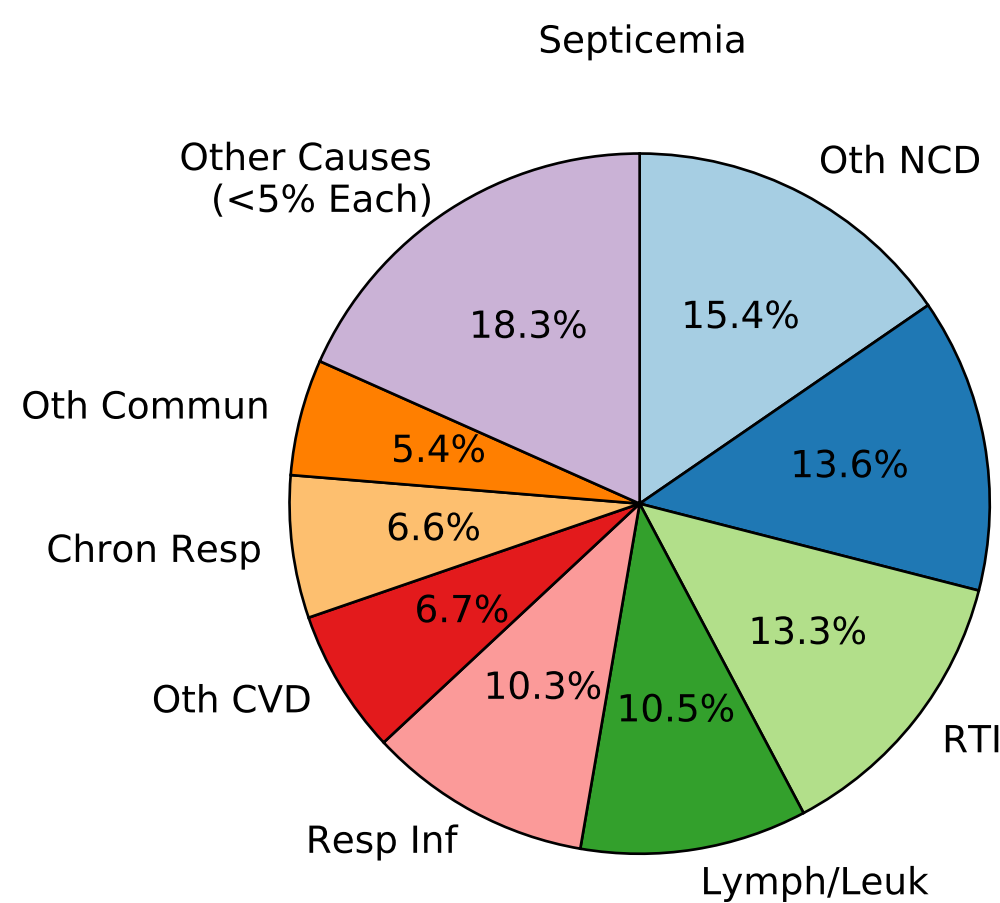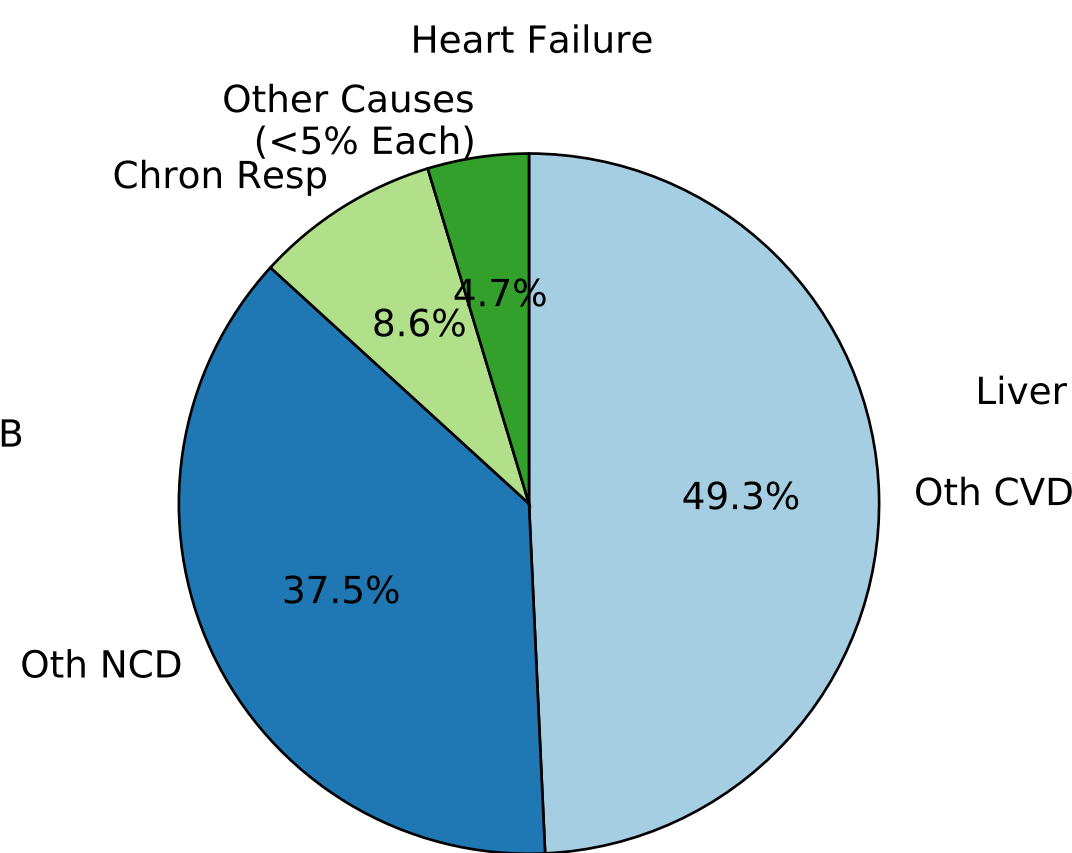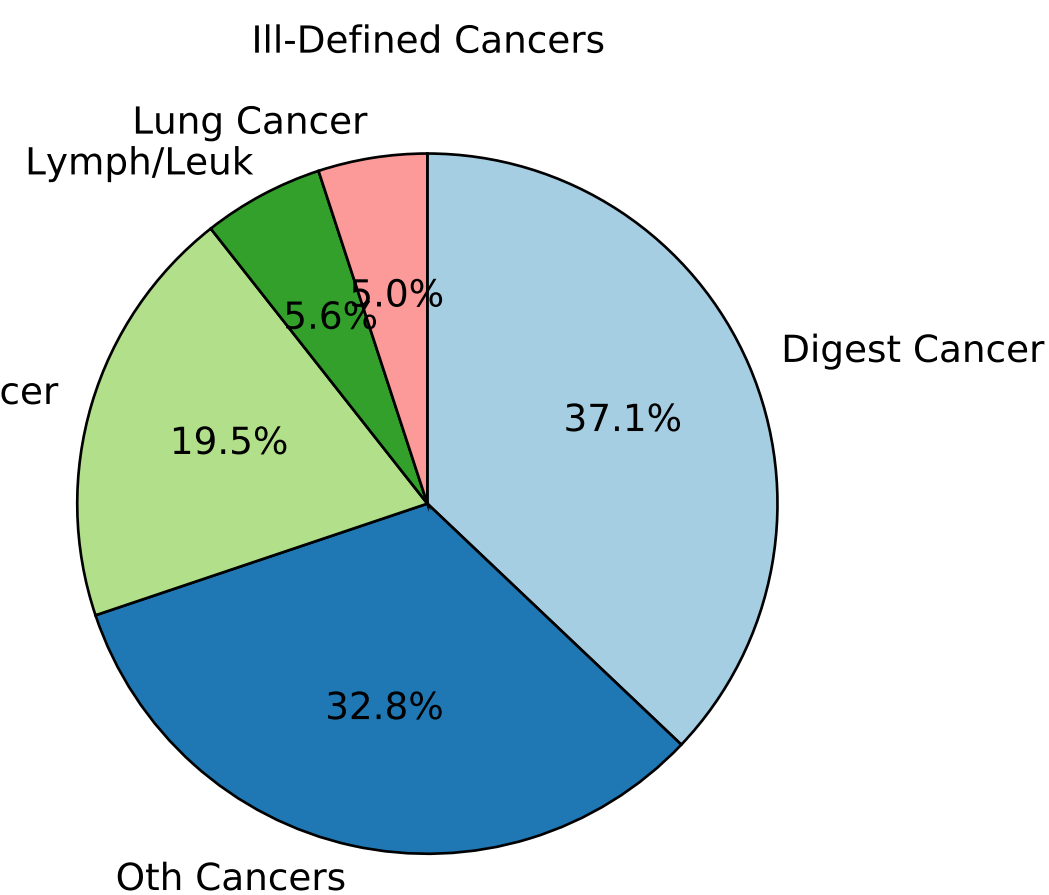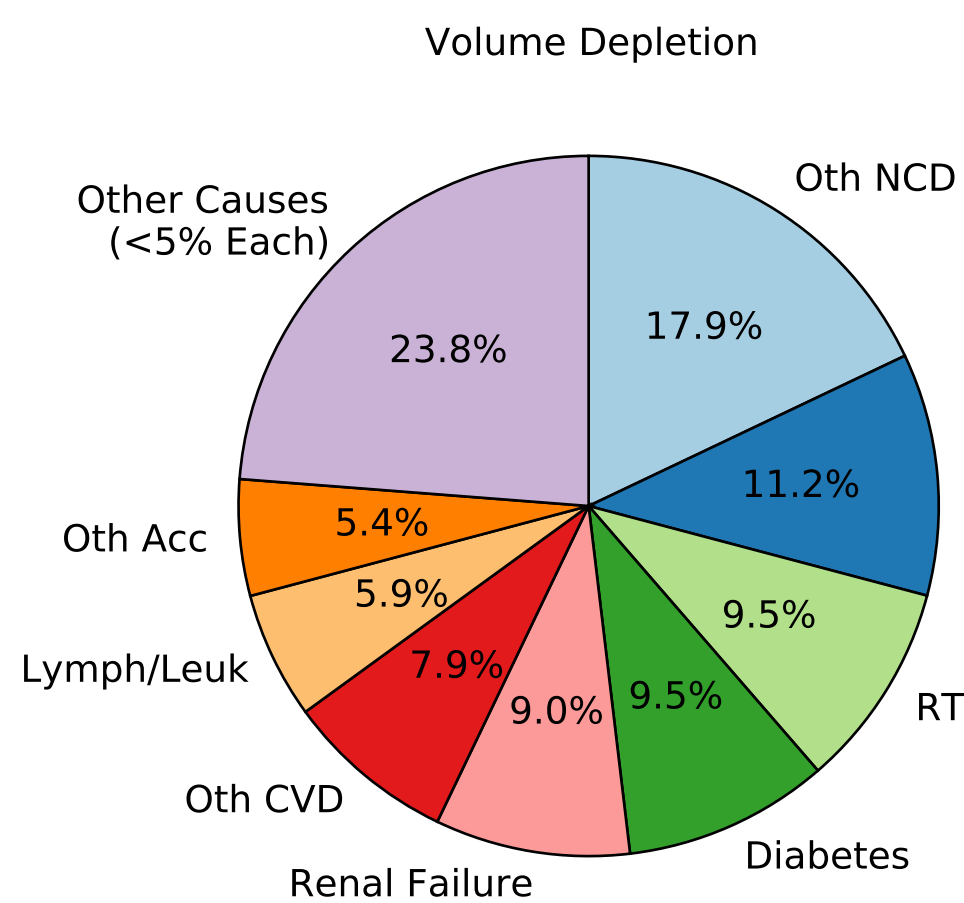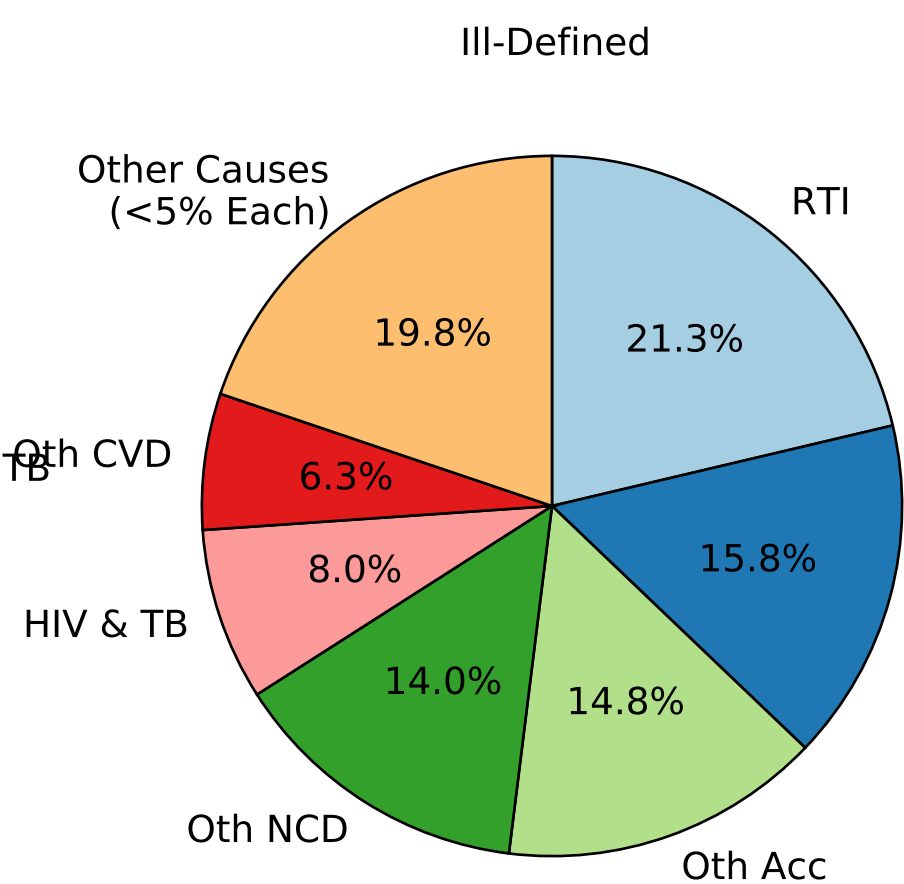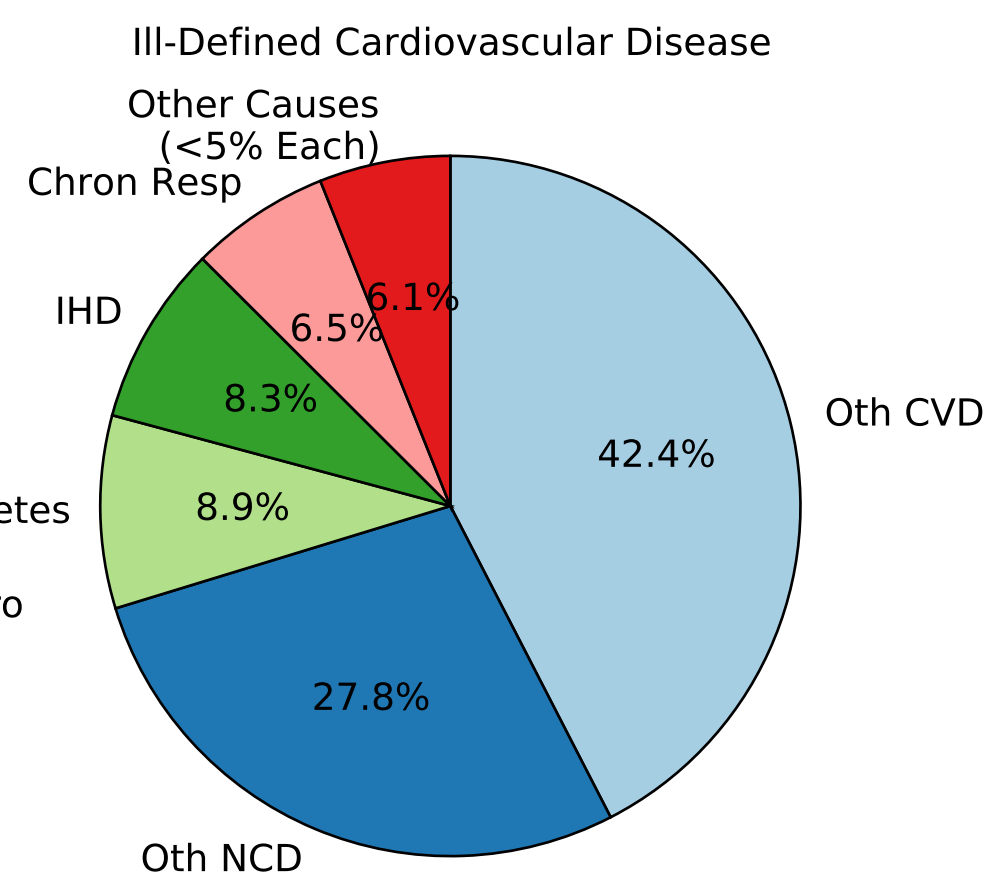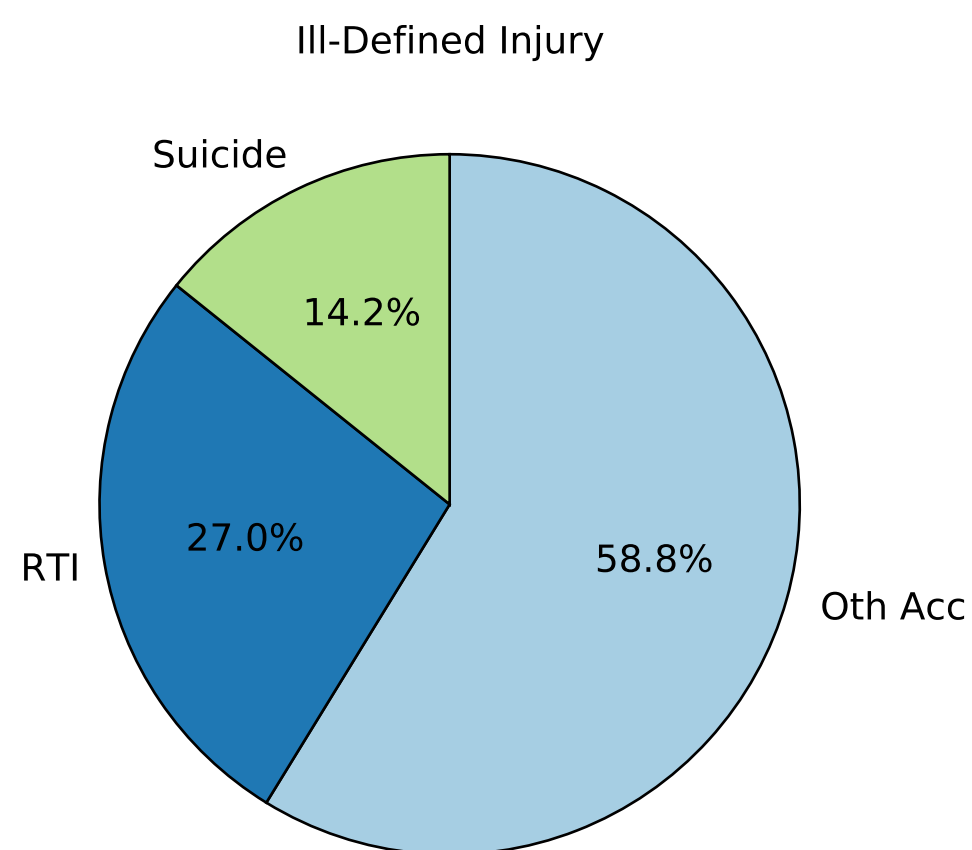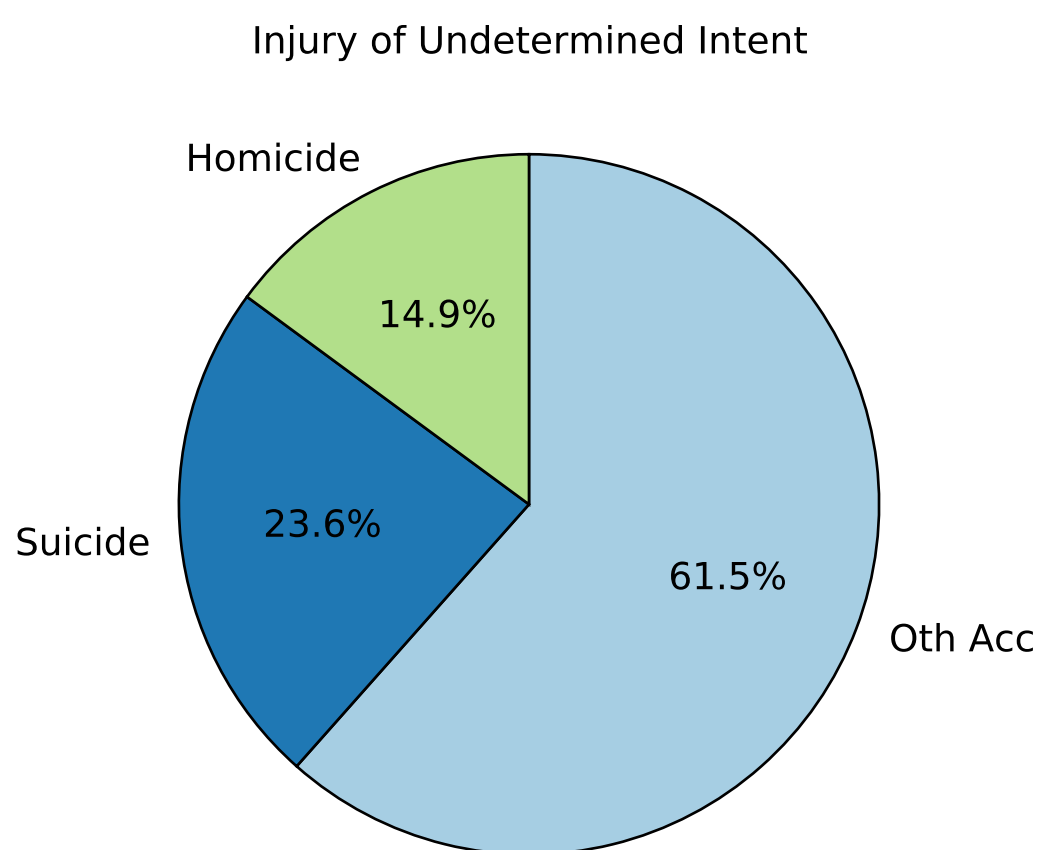

III-Defined Infectious Disease

ICD 9  
Male, Age 25

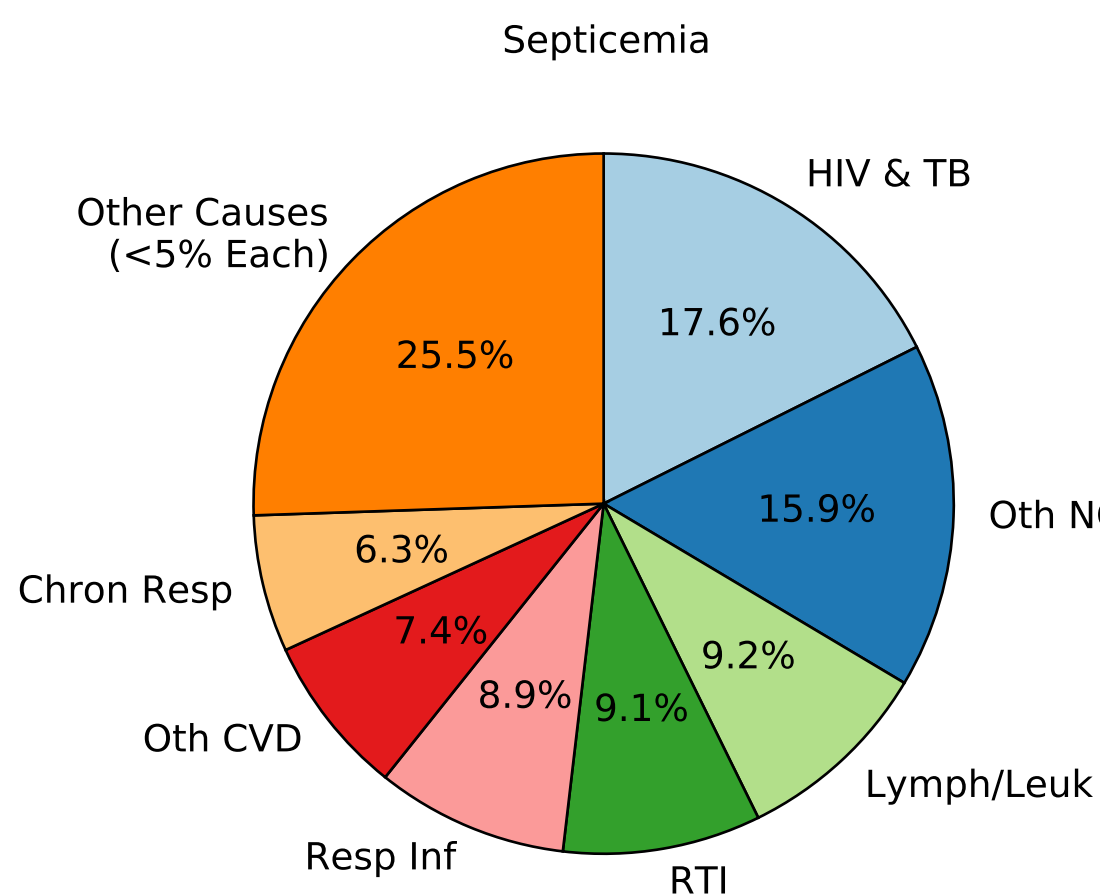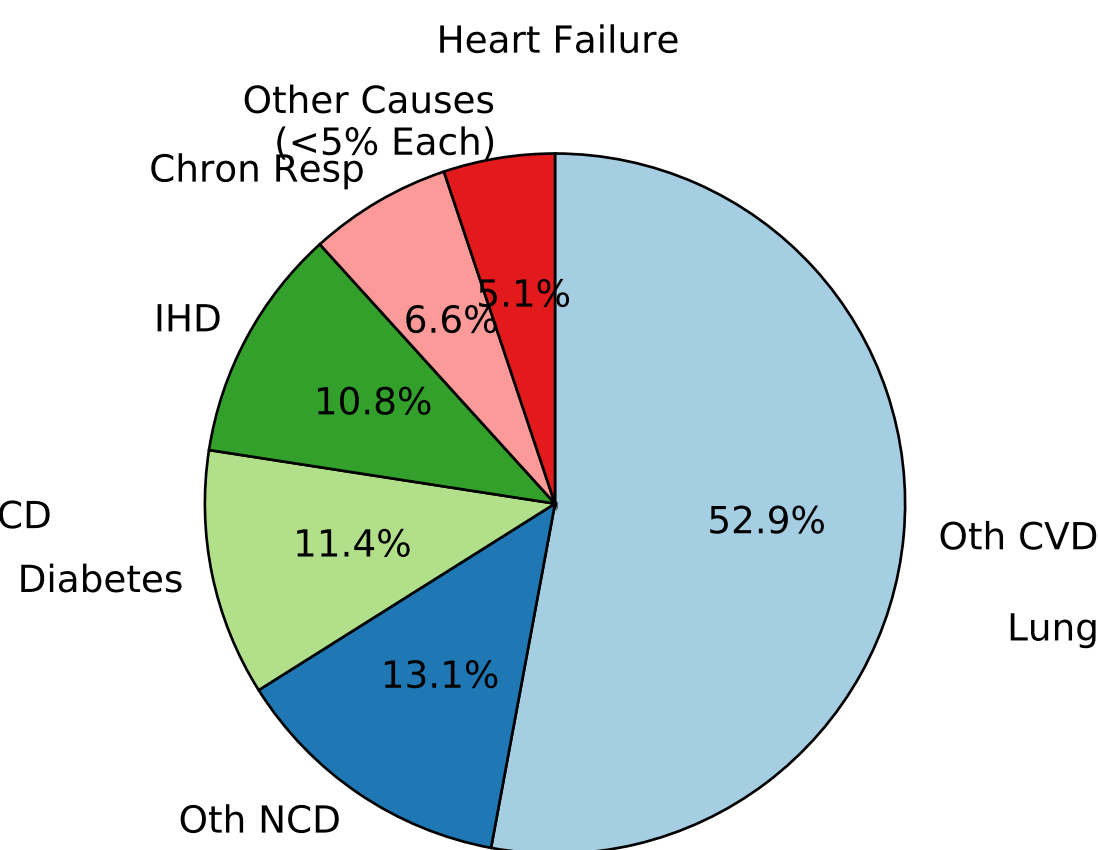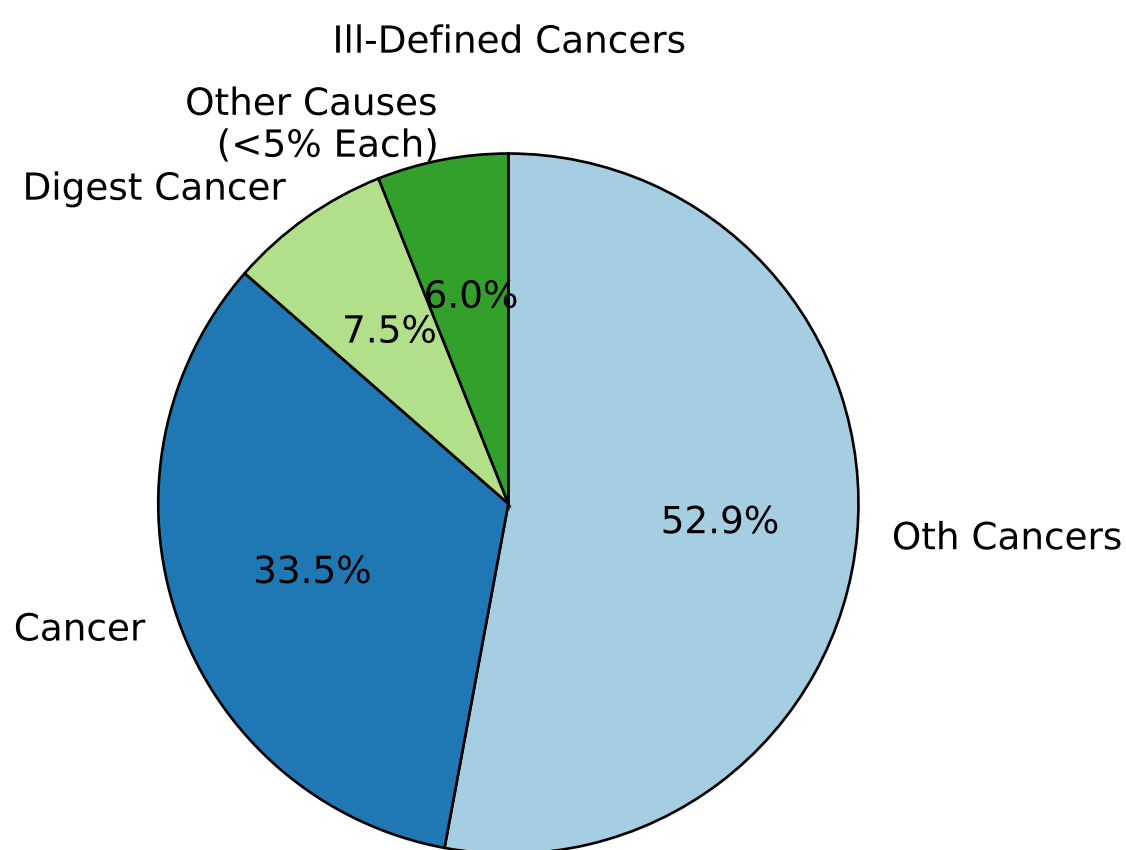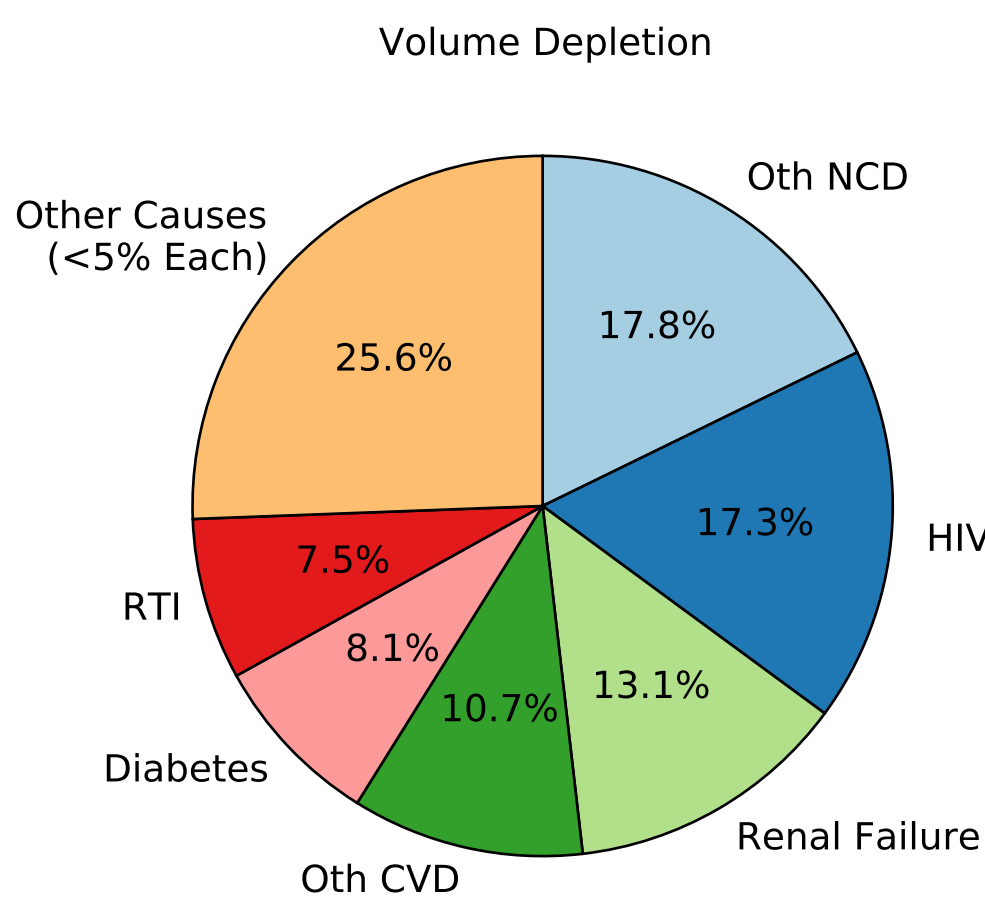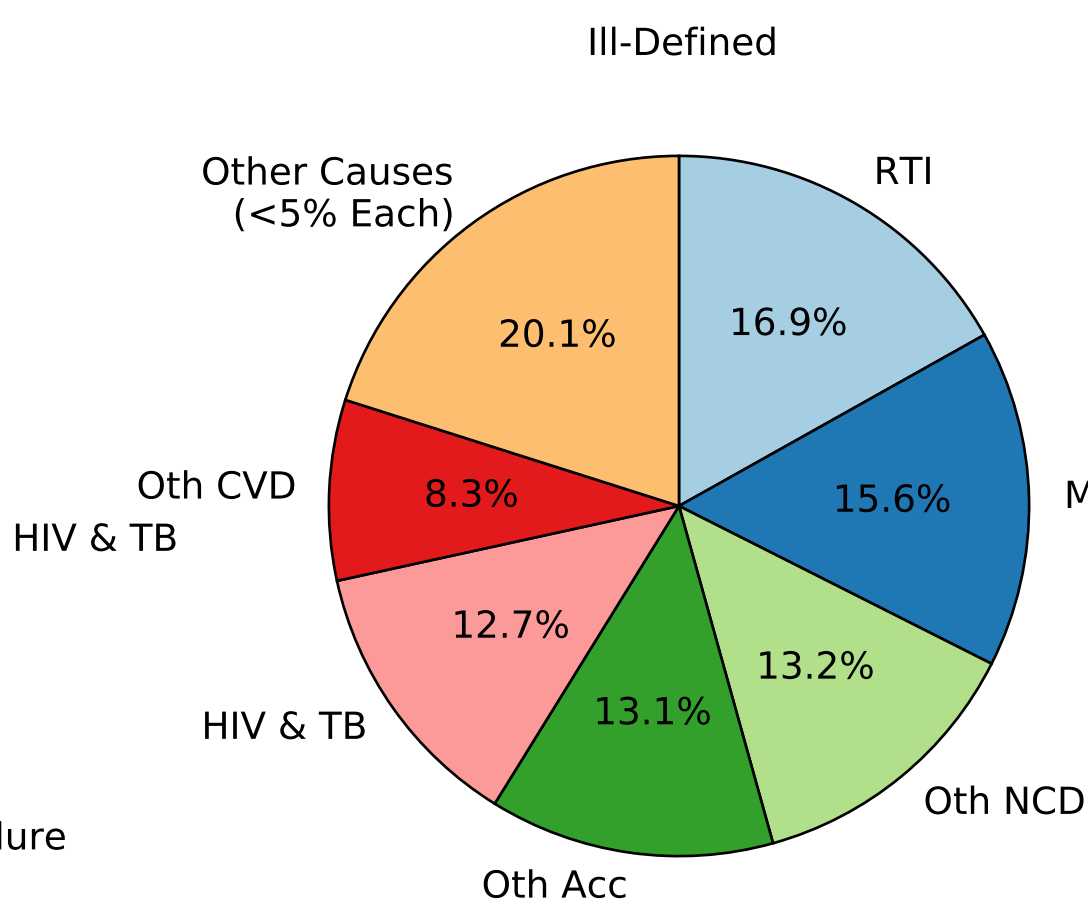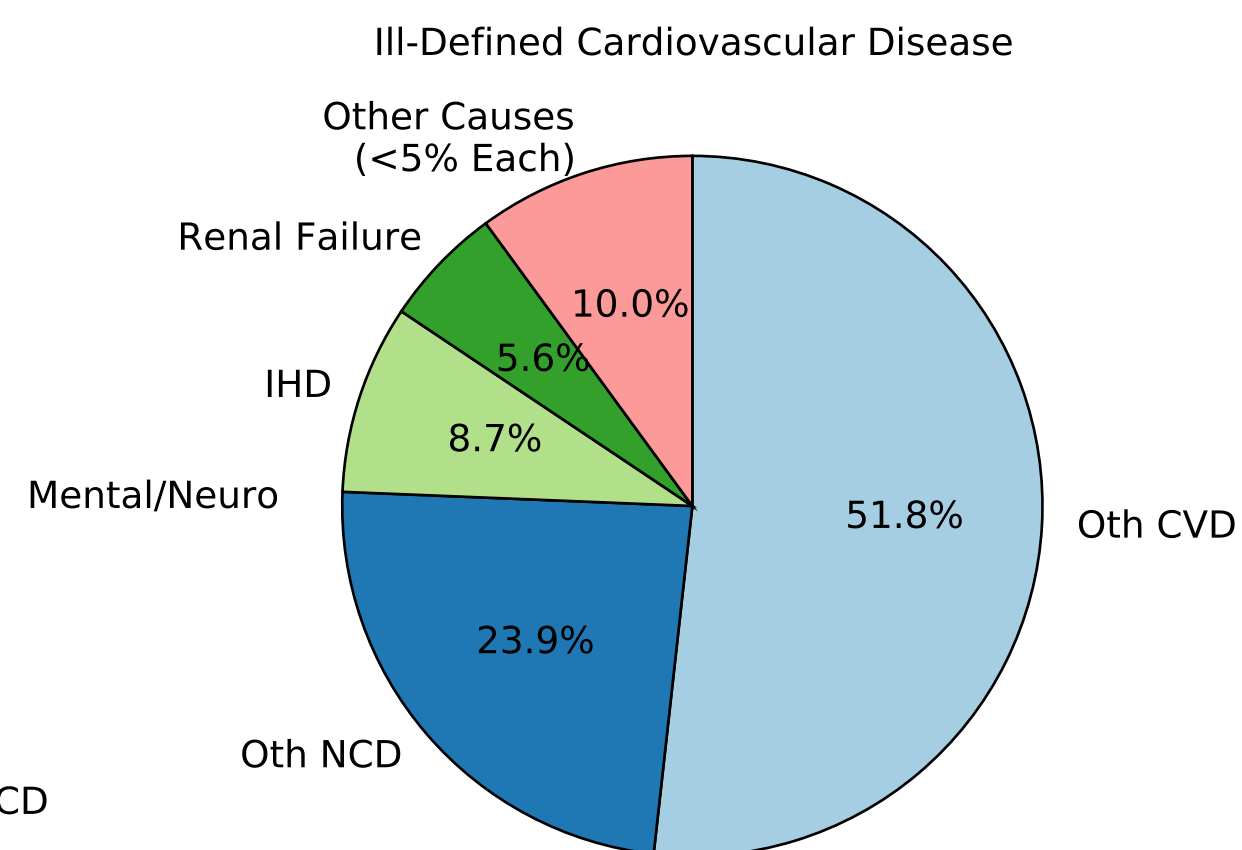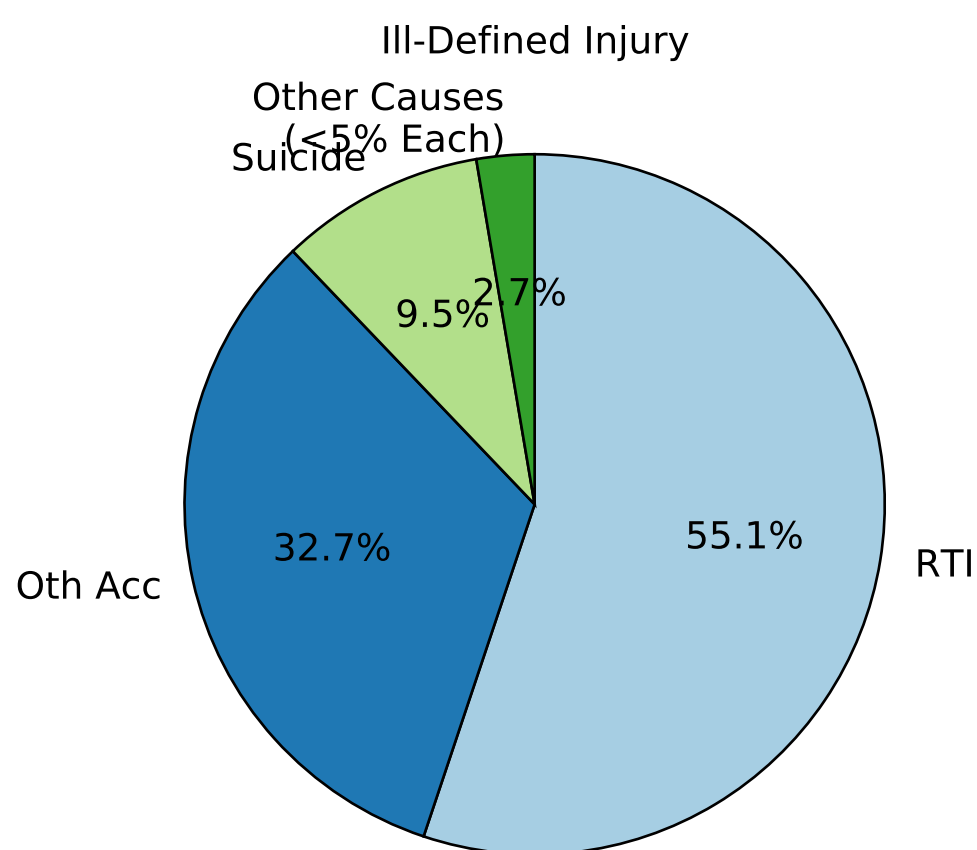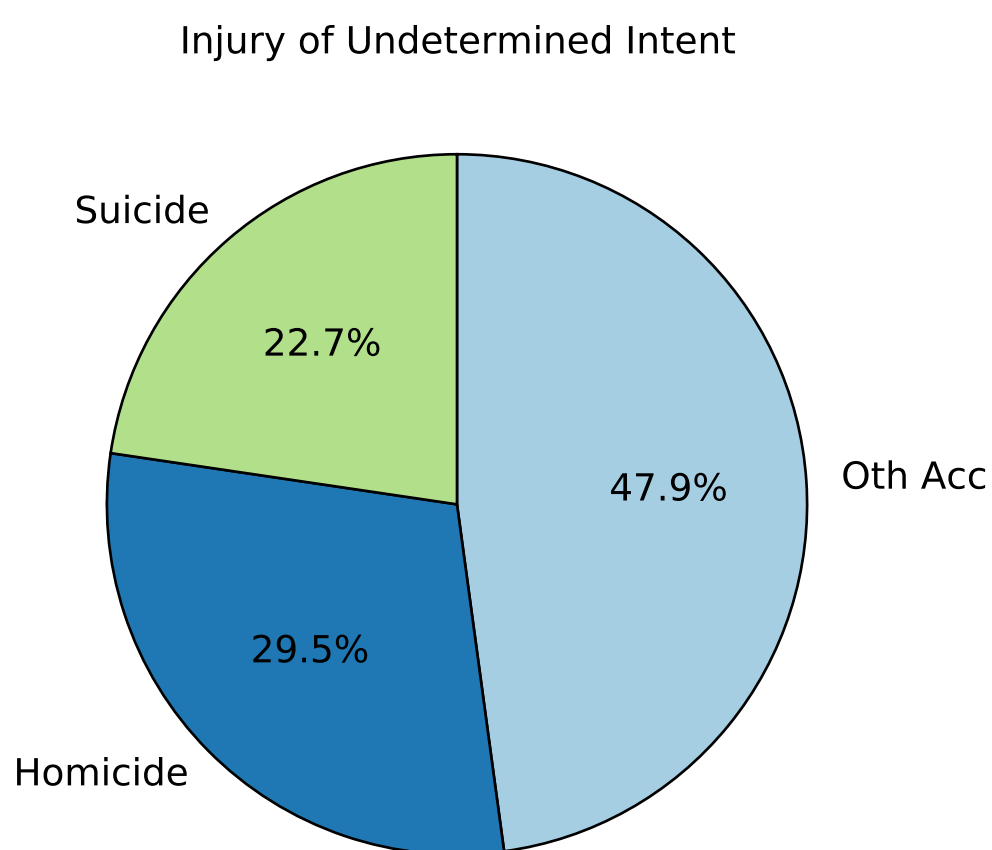

Ill-Defined Infectious Disease



ICD 9  
Male, Age 30

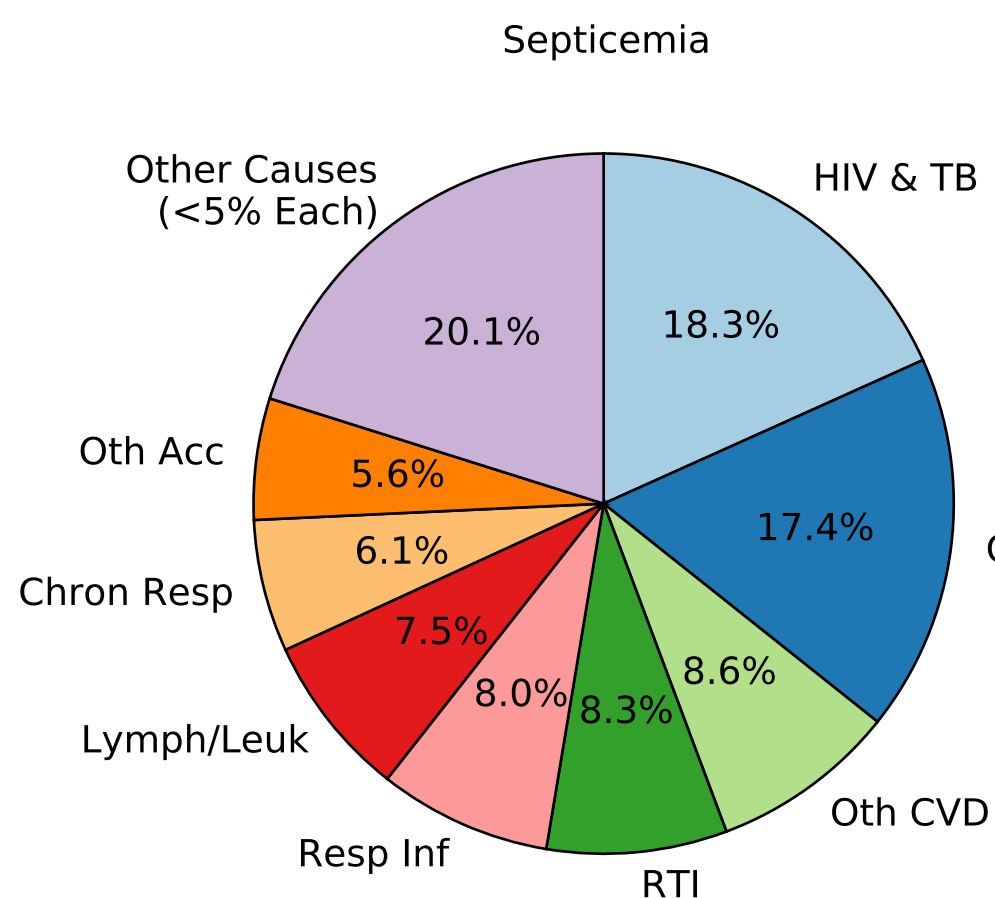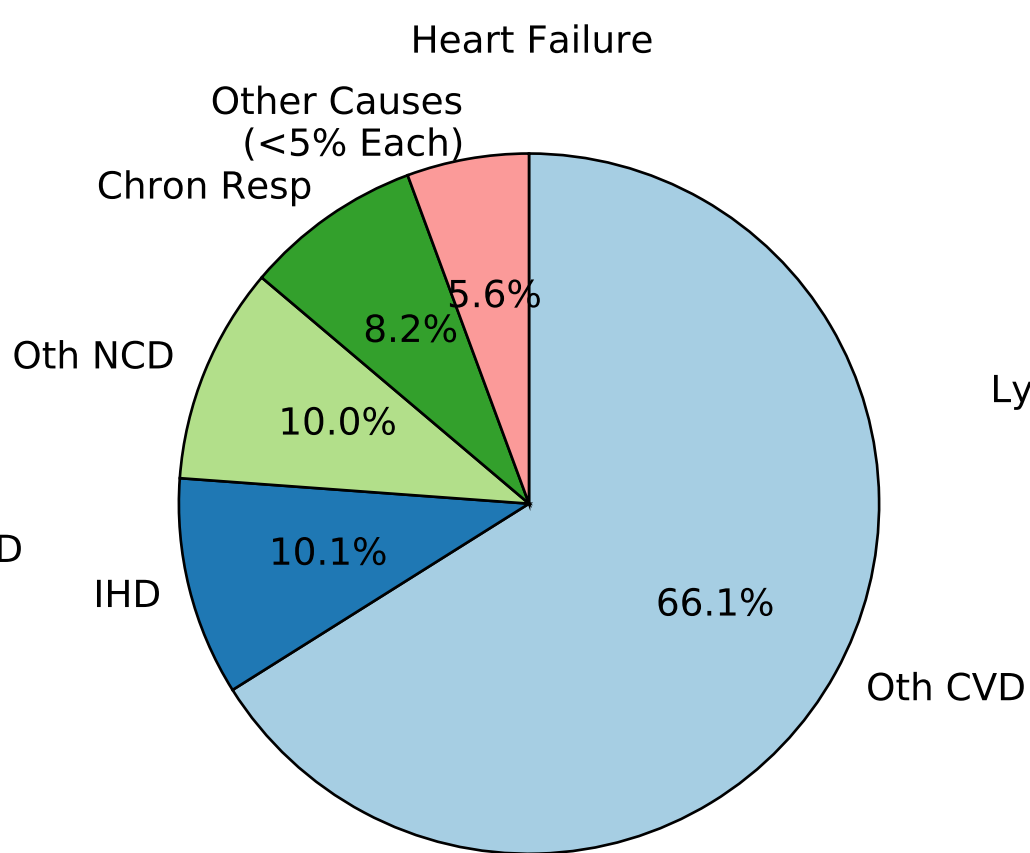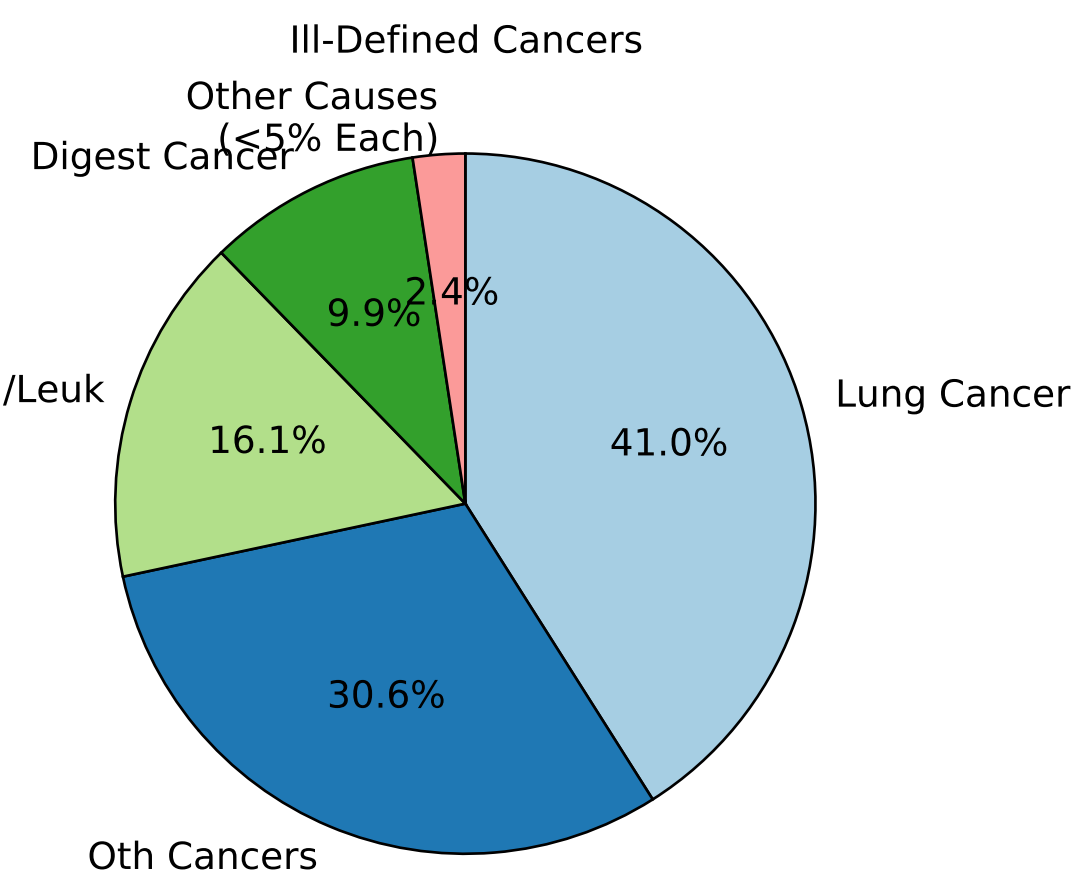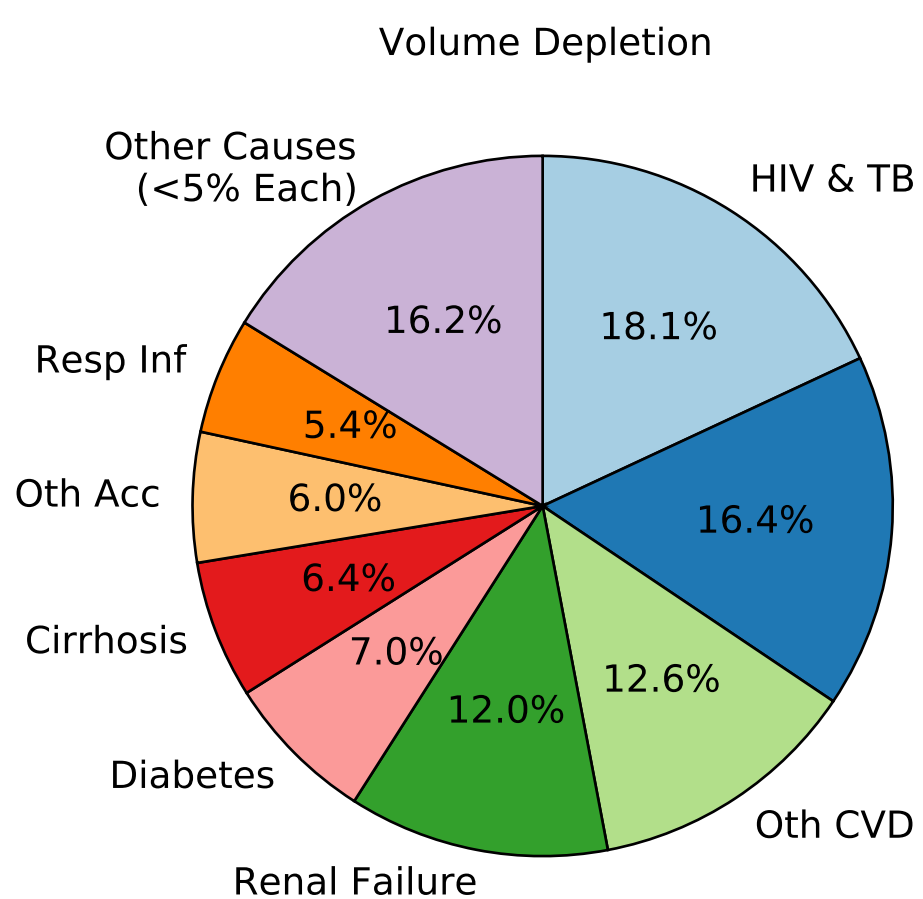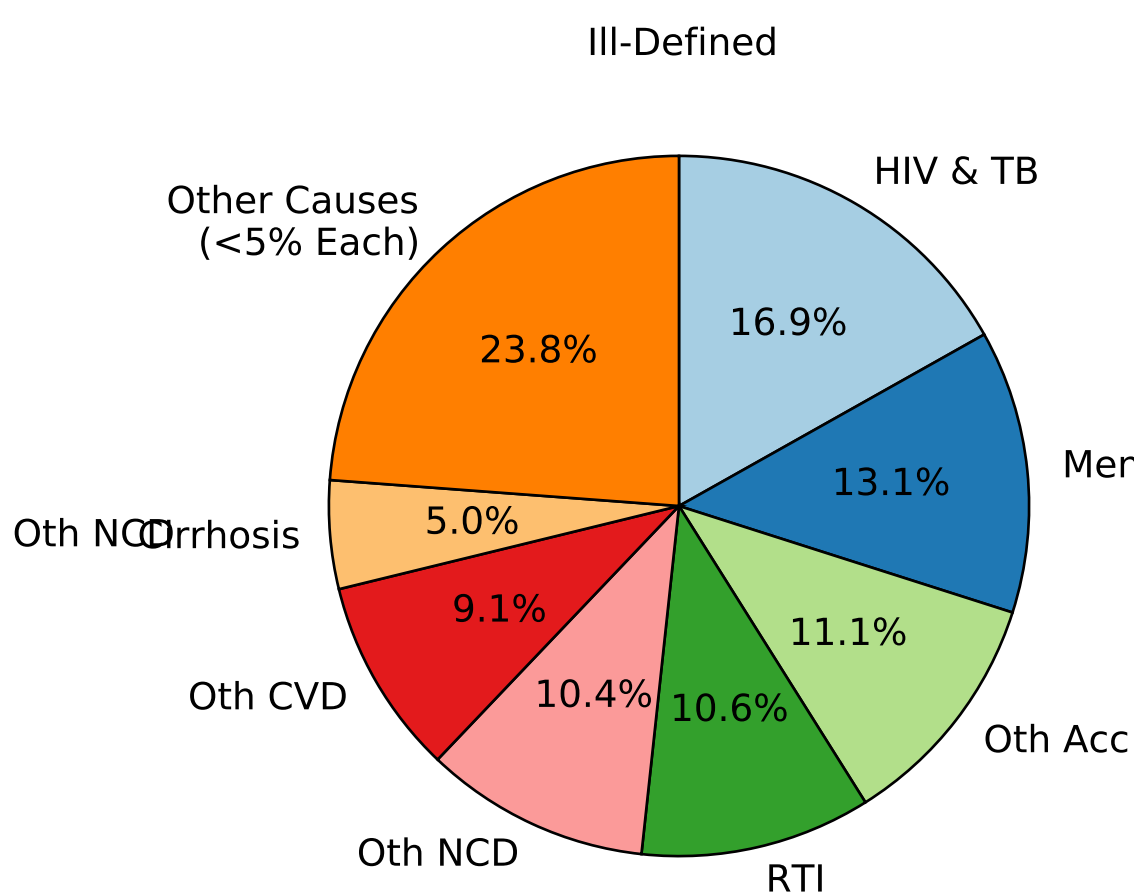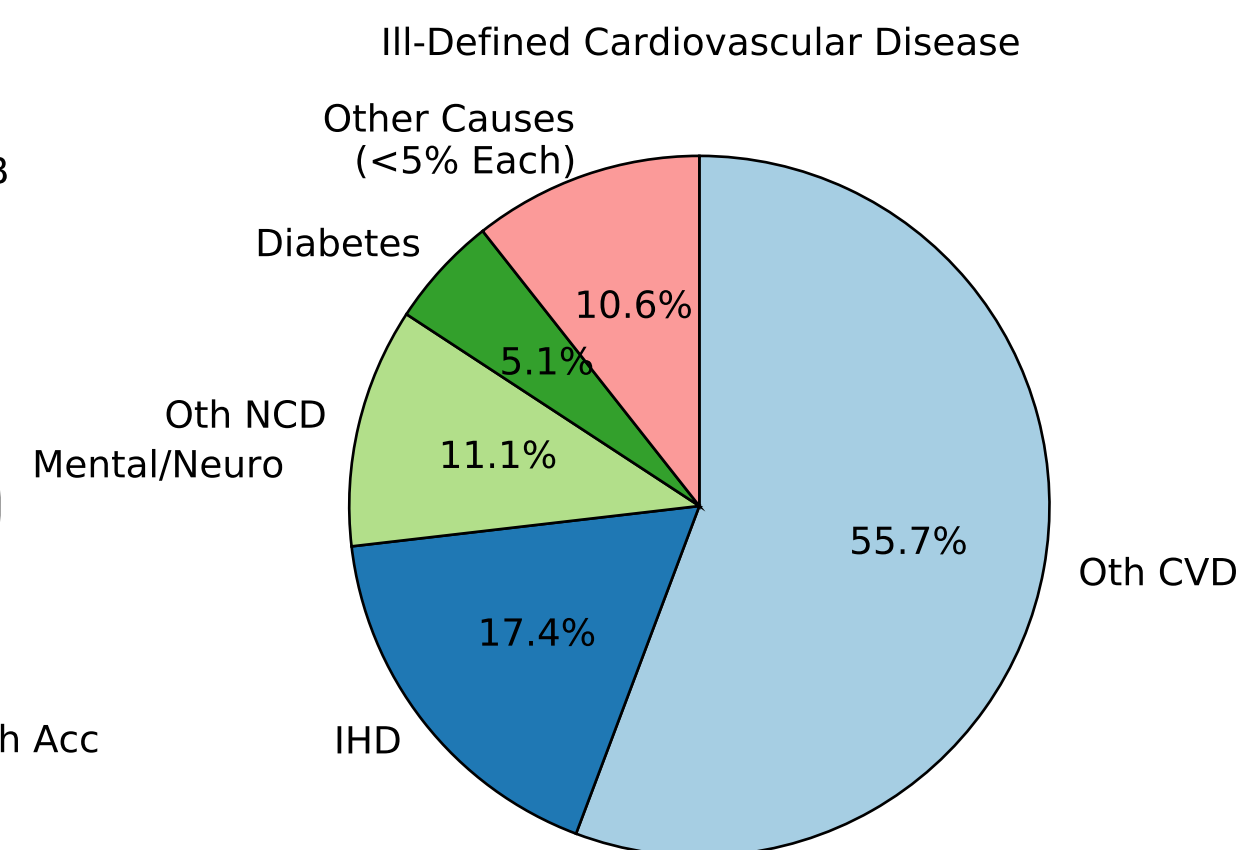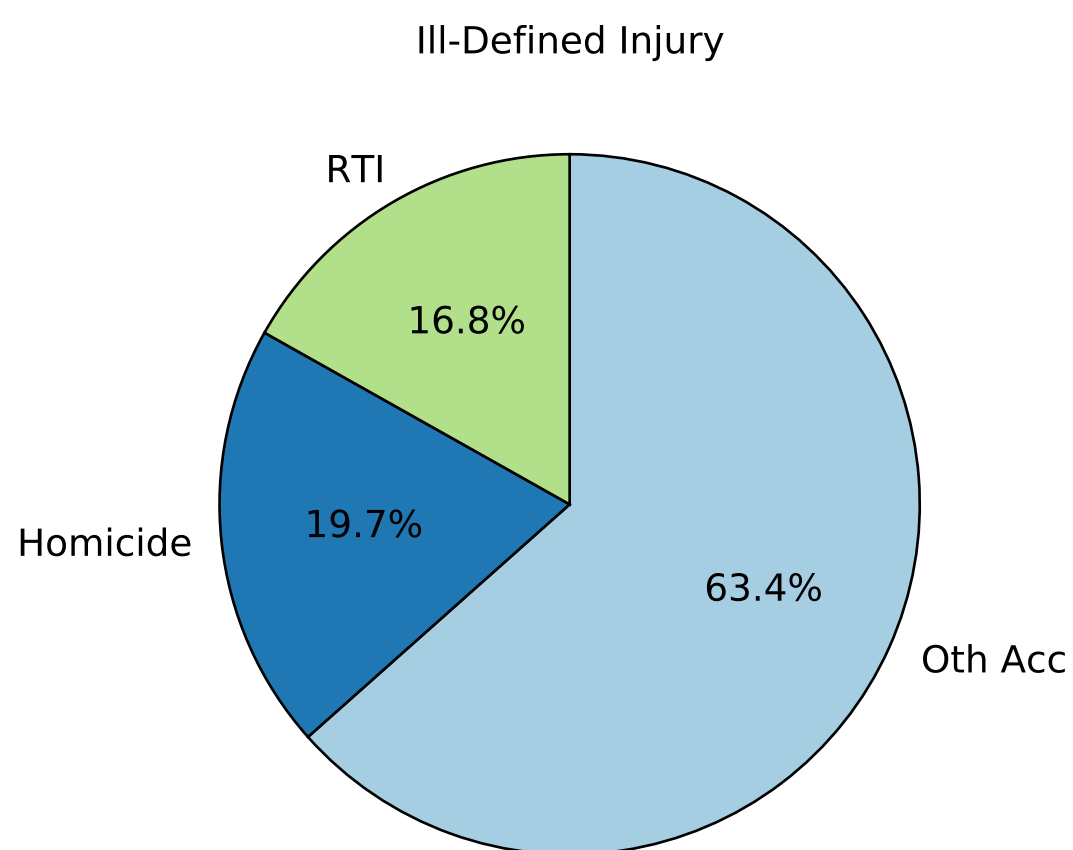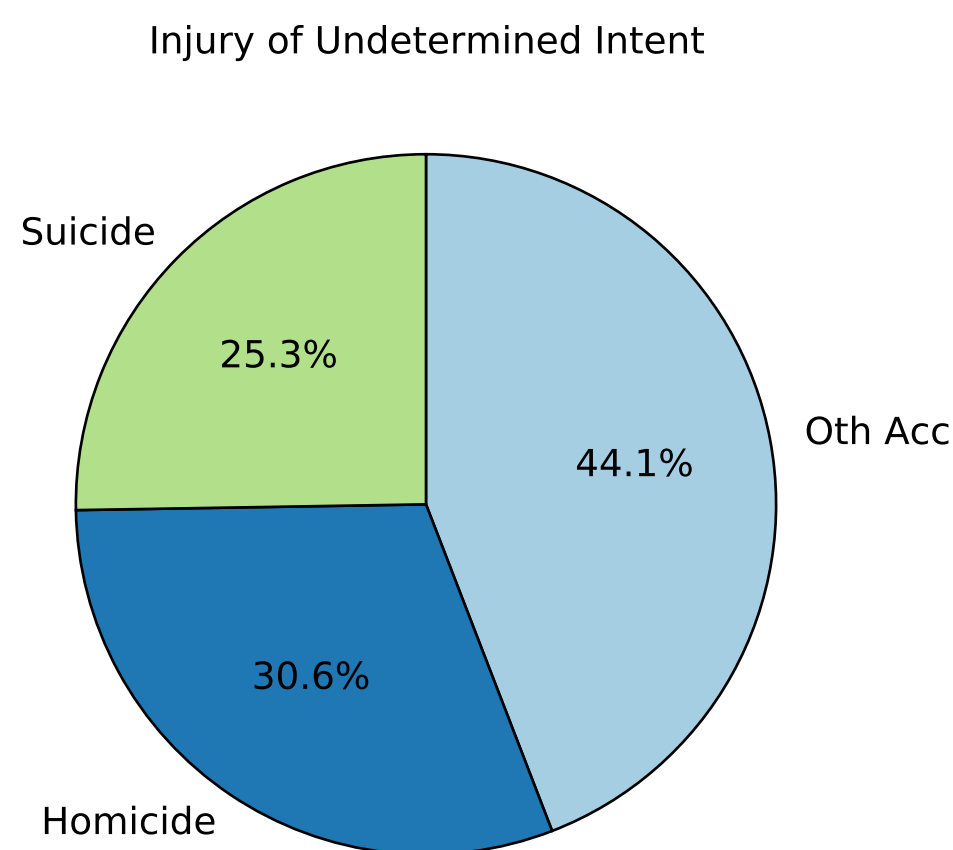

Ill-Defined Infectious Disease

ICD 9  
Male, Age 35

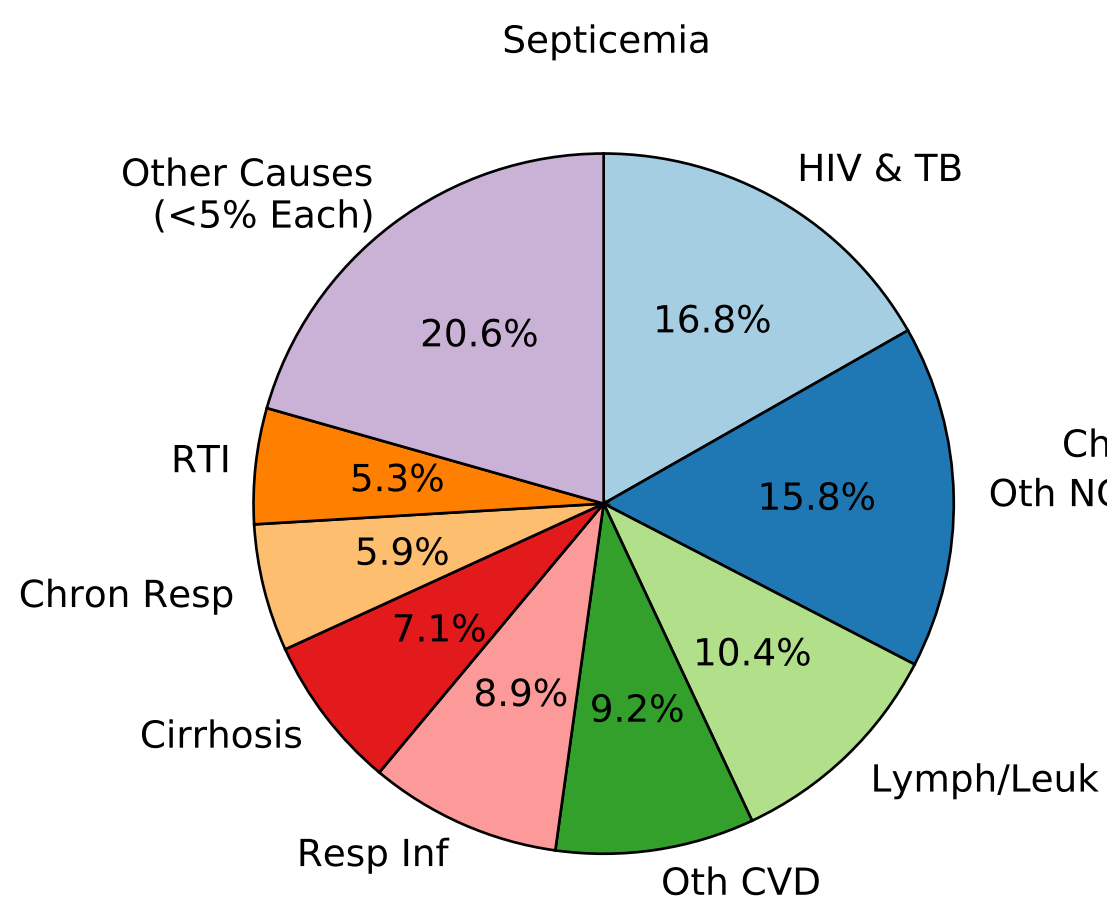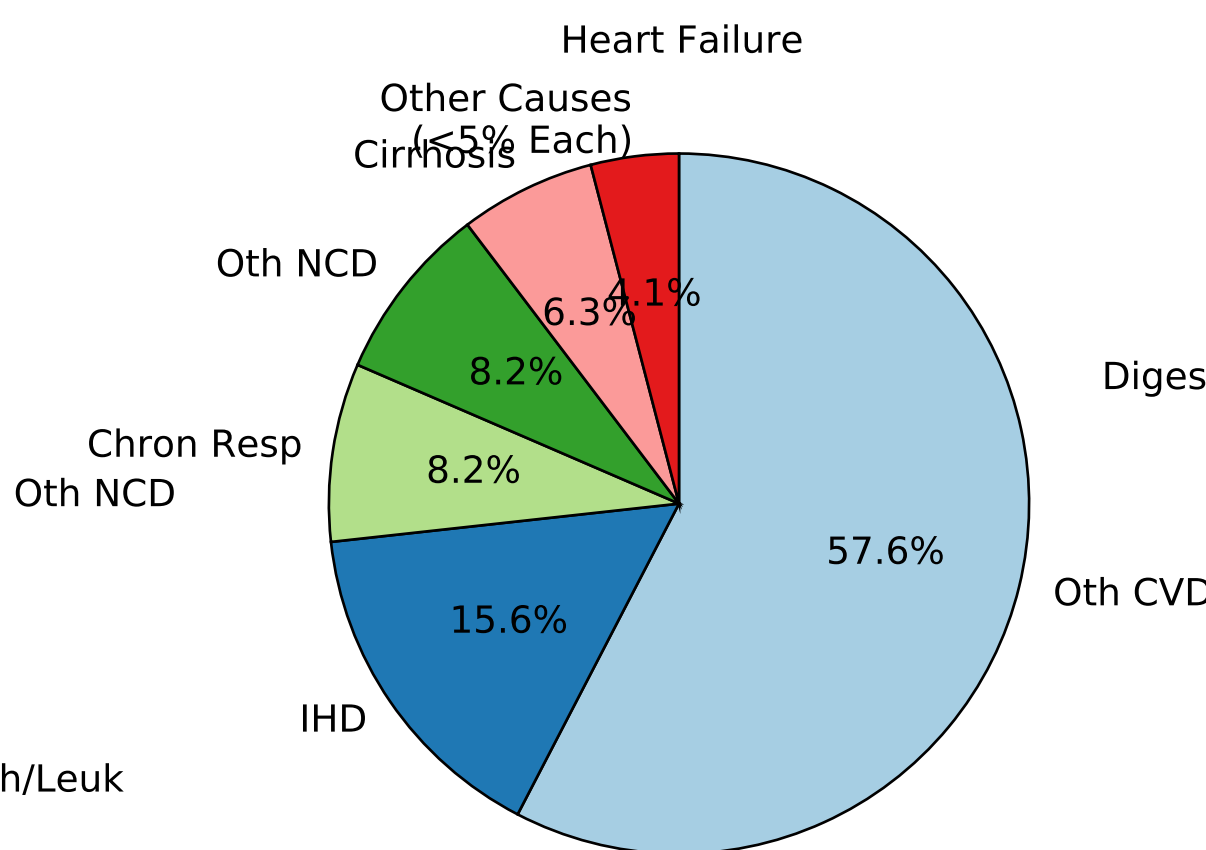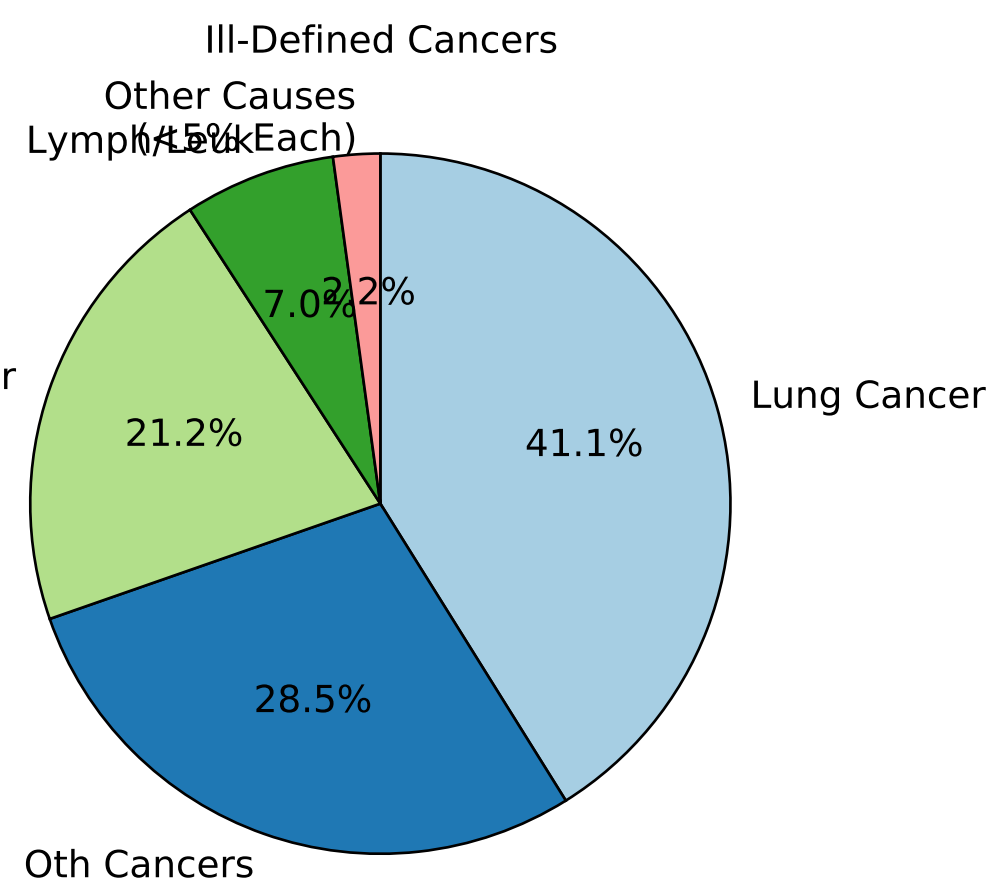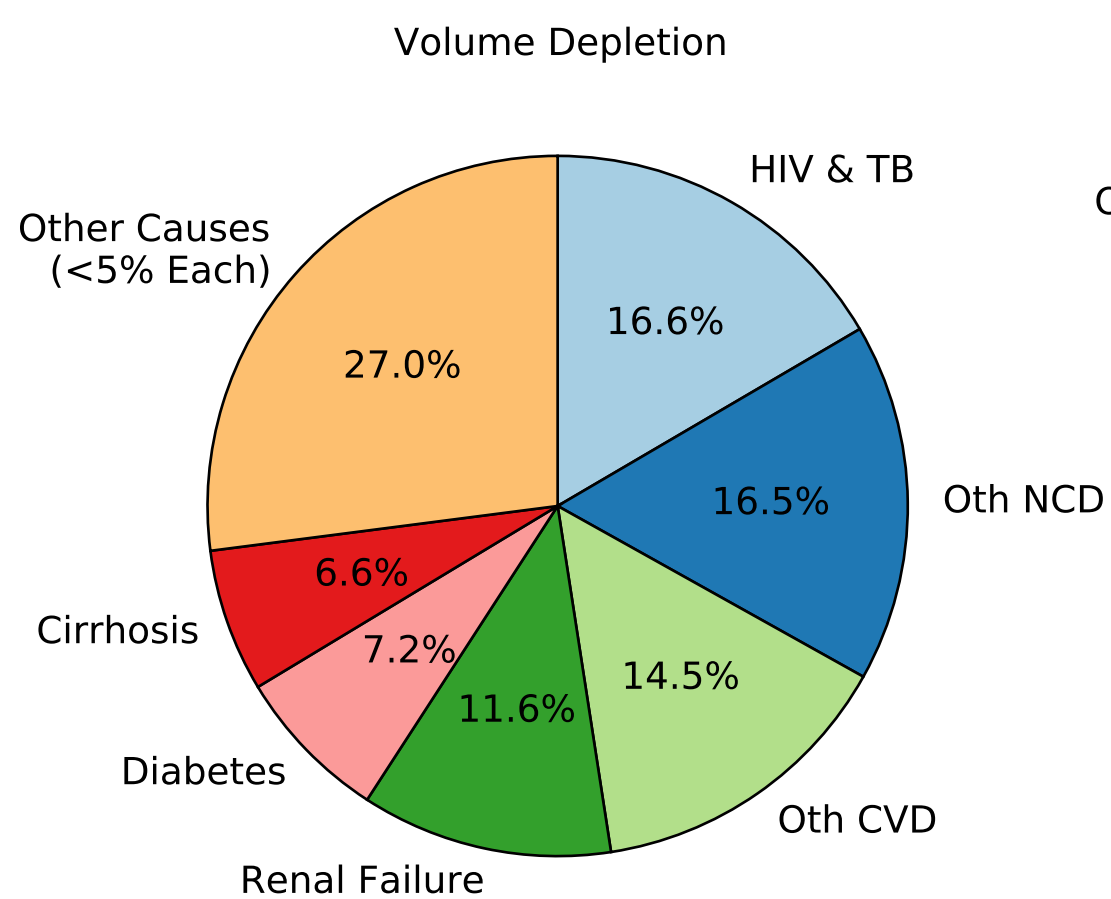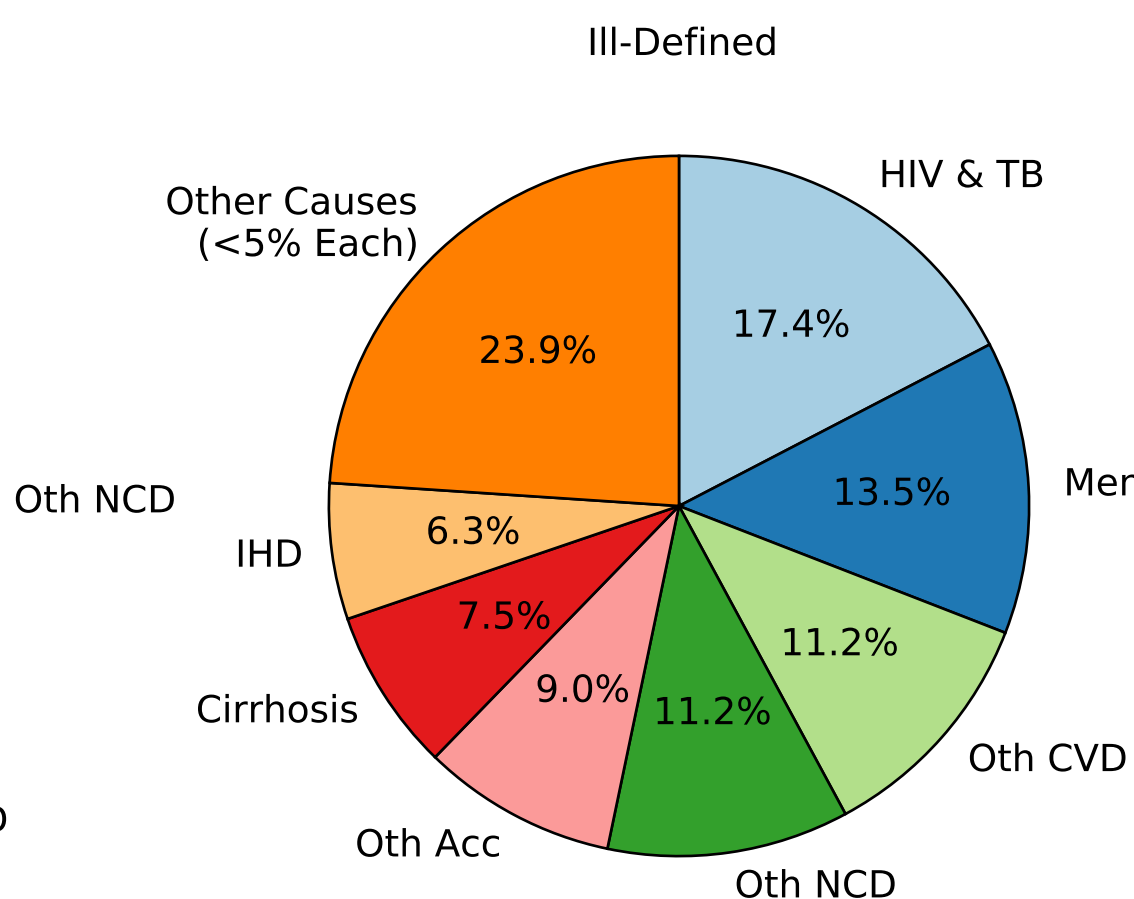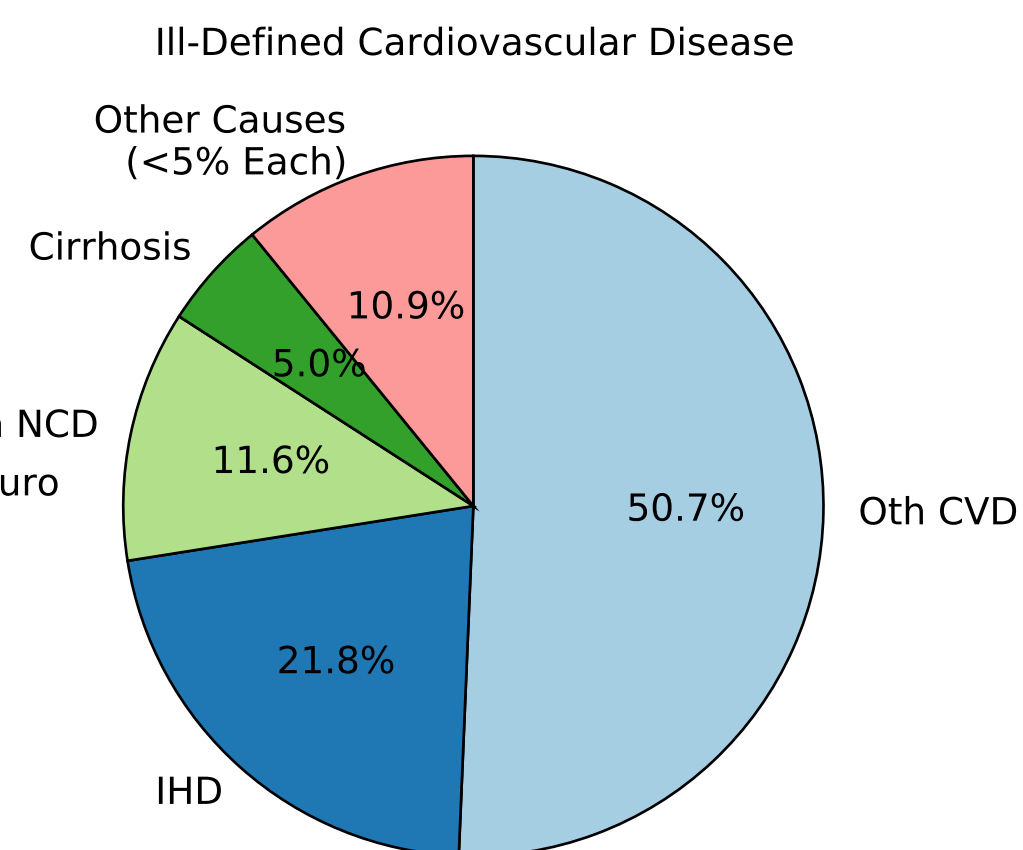

Ill-Defined Injury

Injury of Undetermined Intent

Ill-Defined Infectious Disease

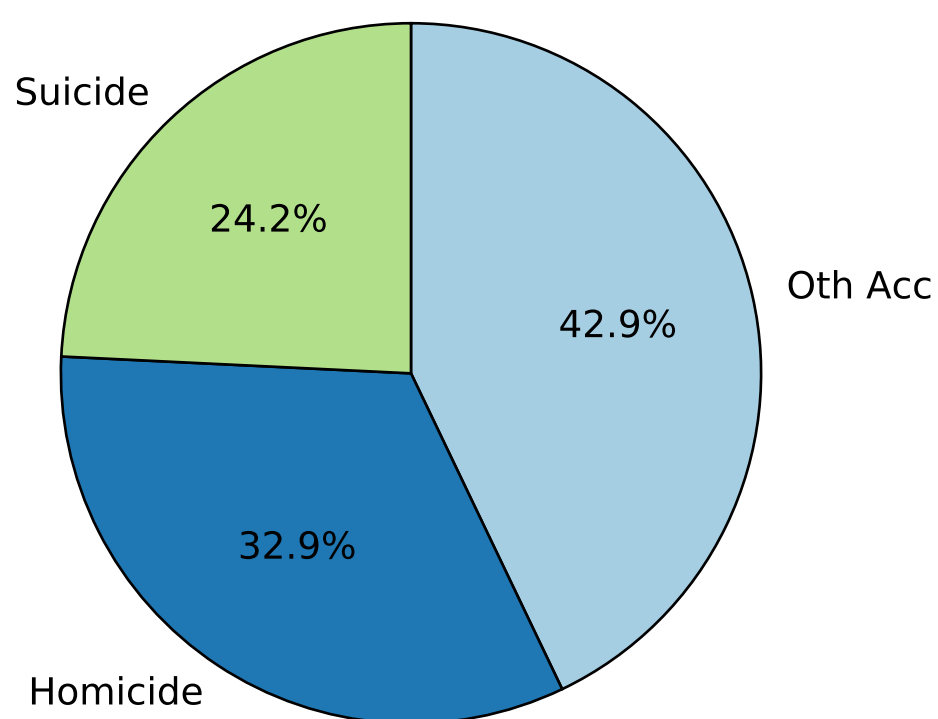

ICD 9  
Male, Age 40

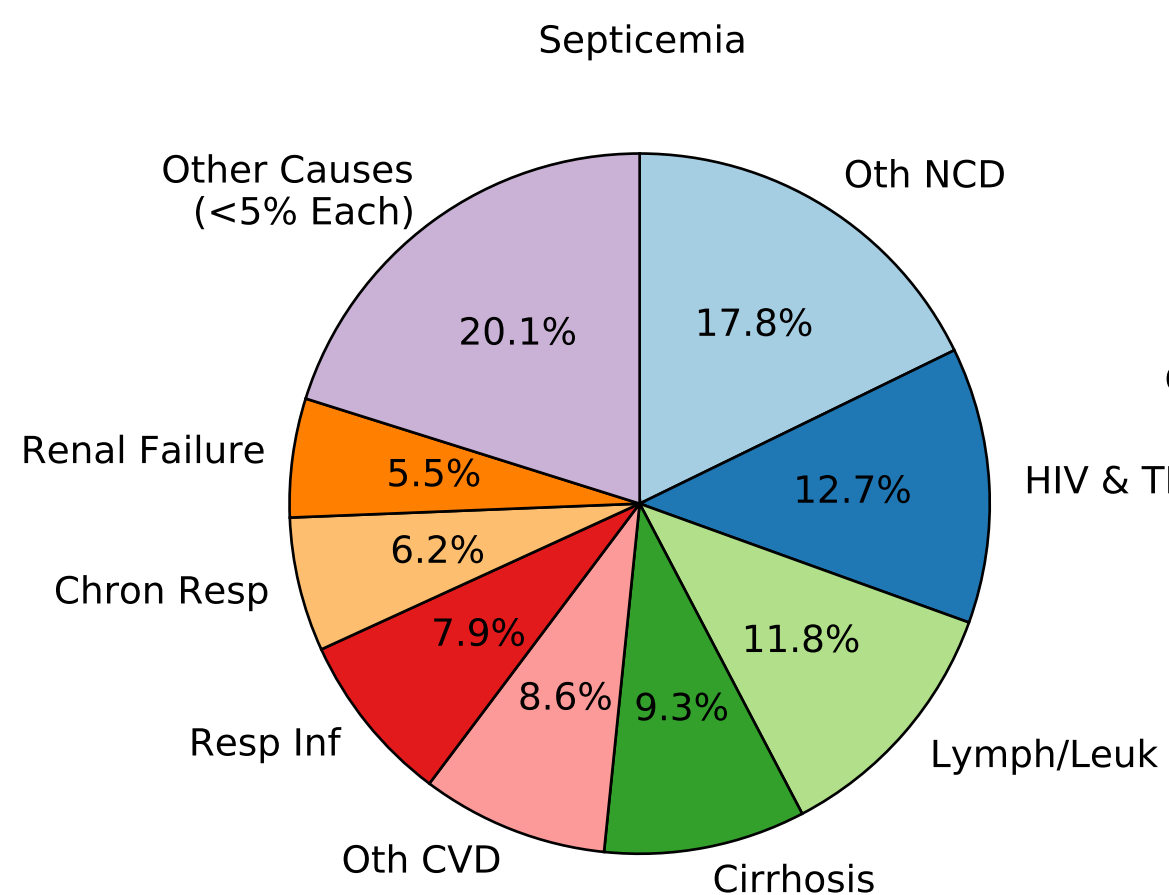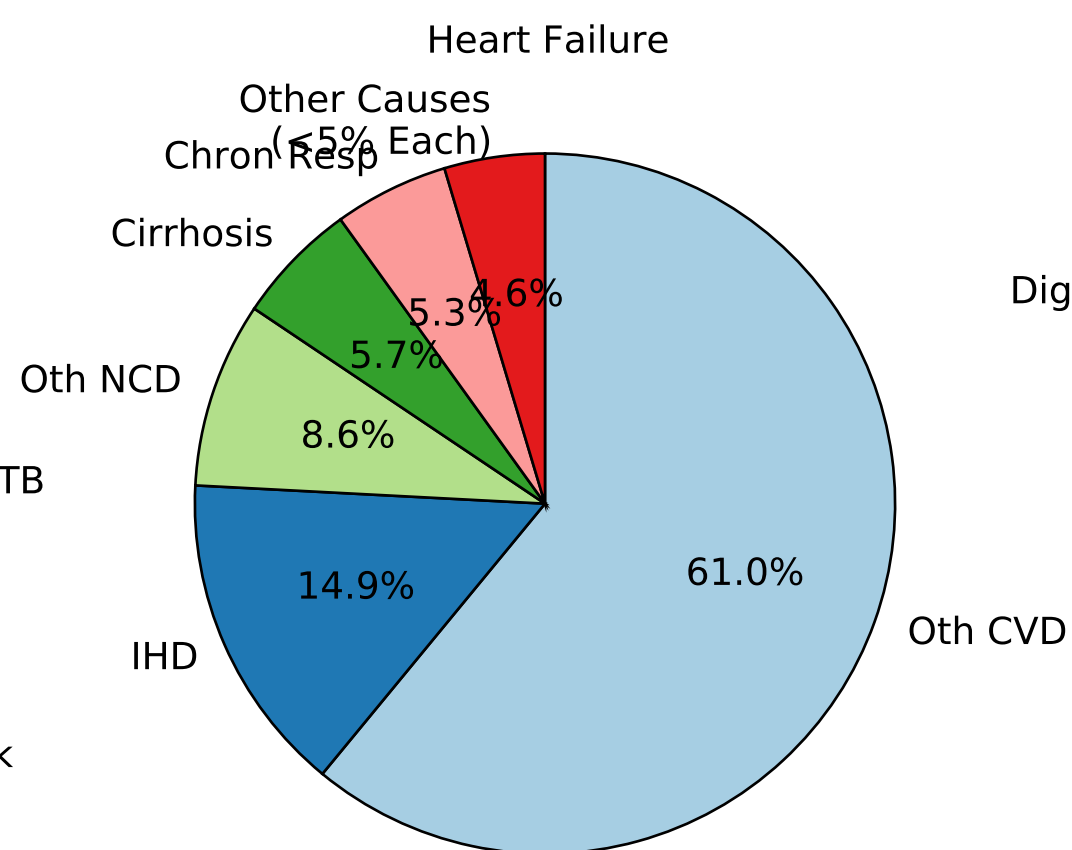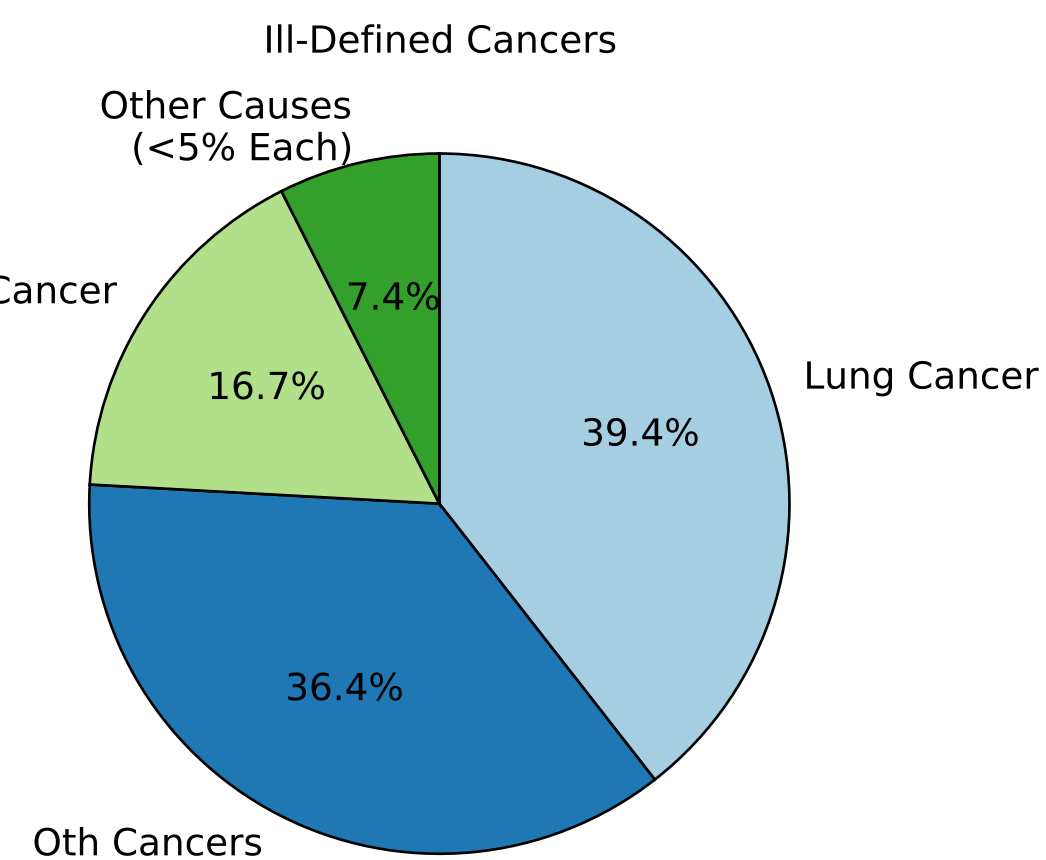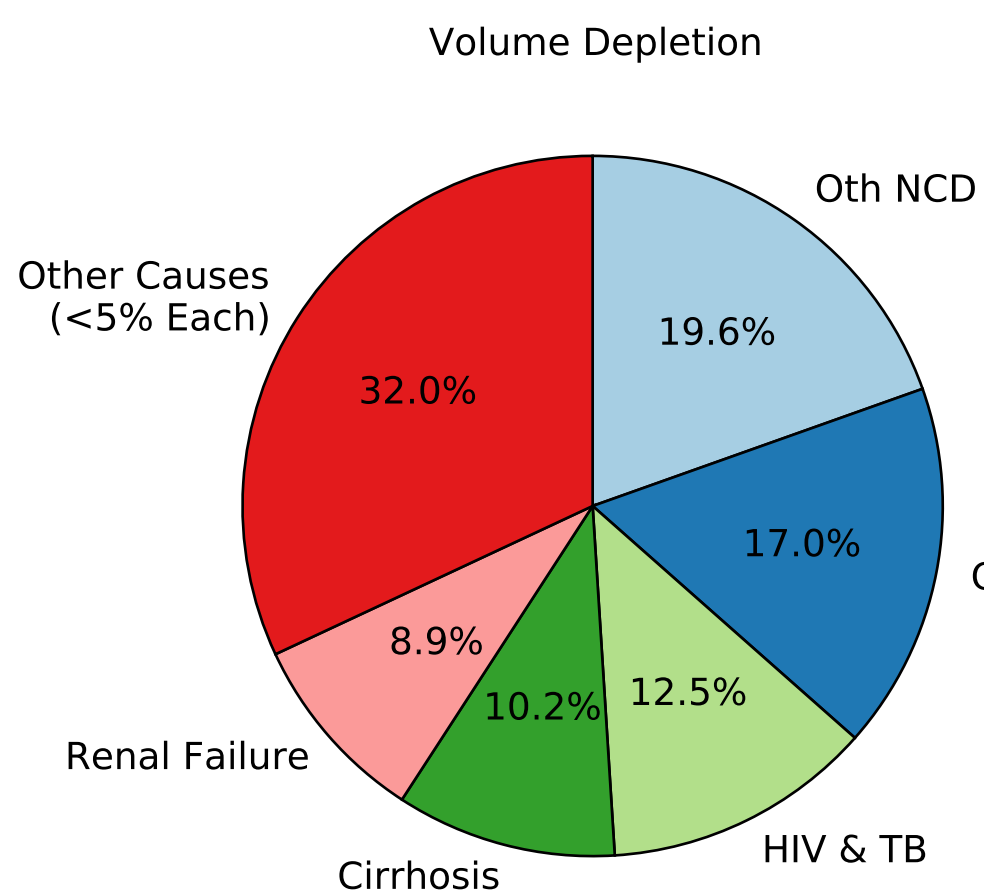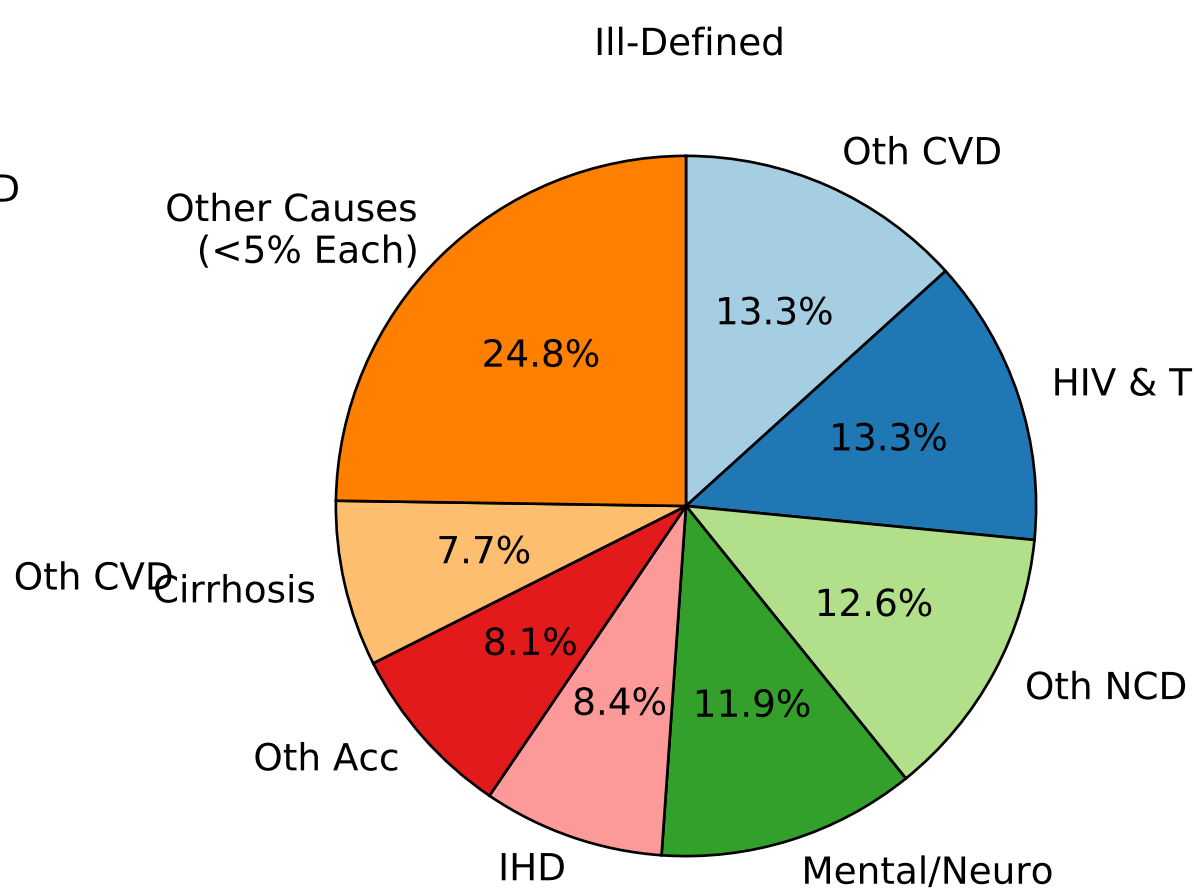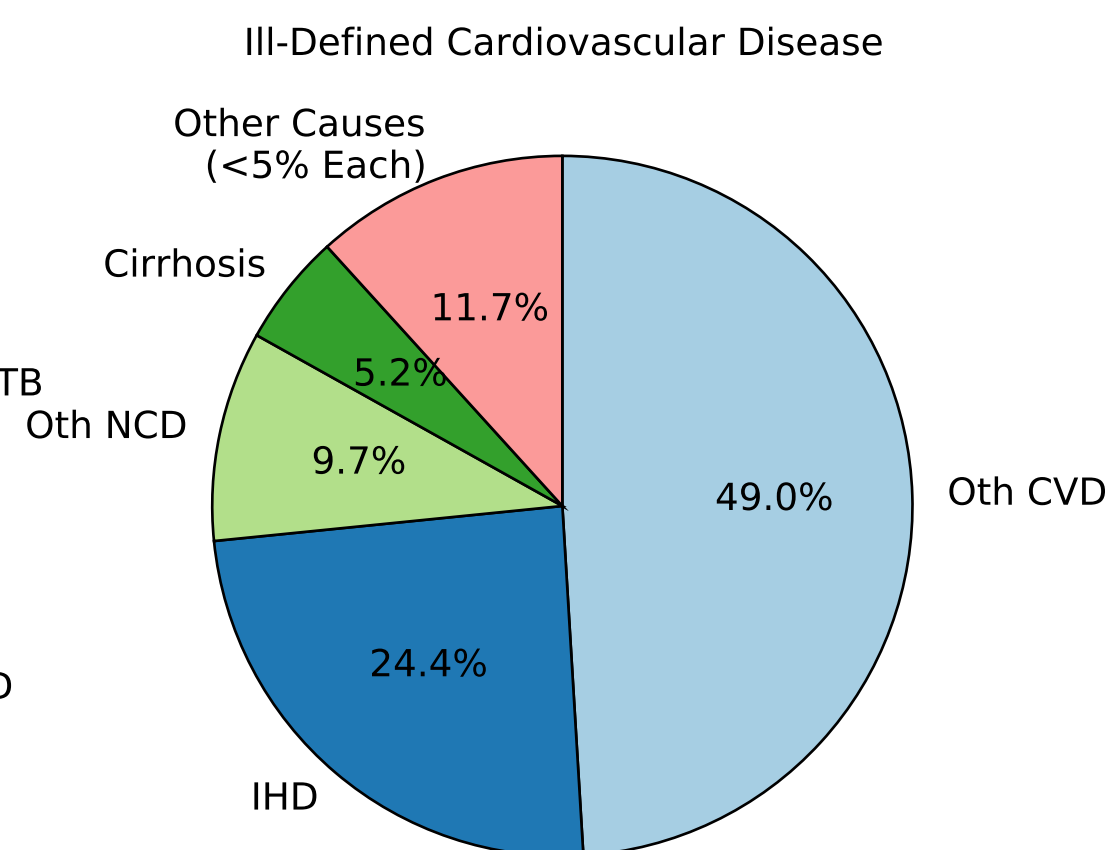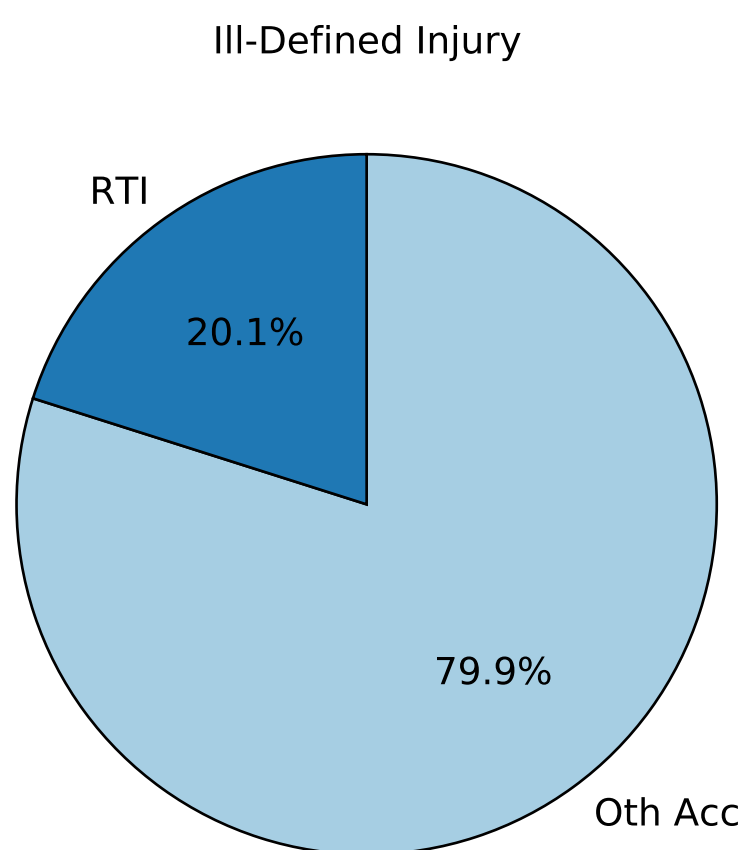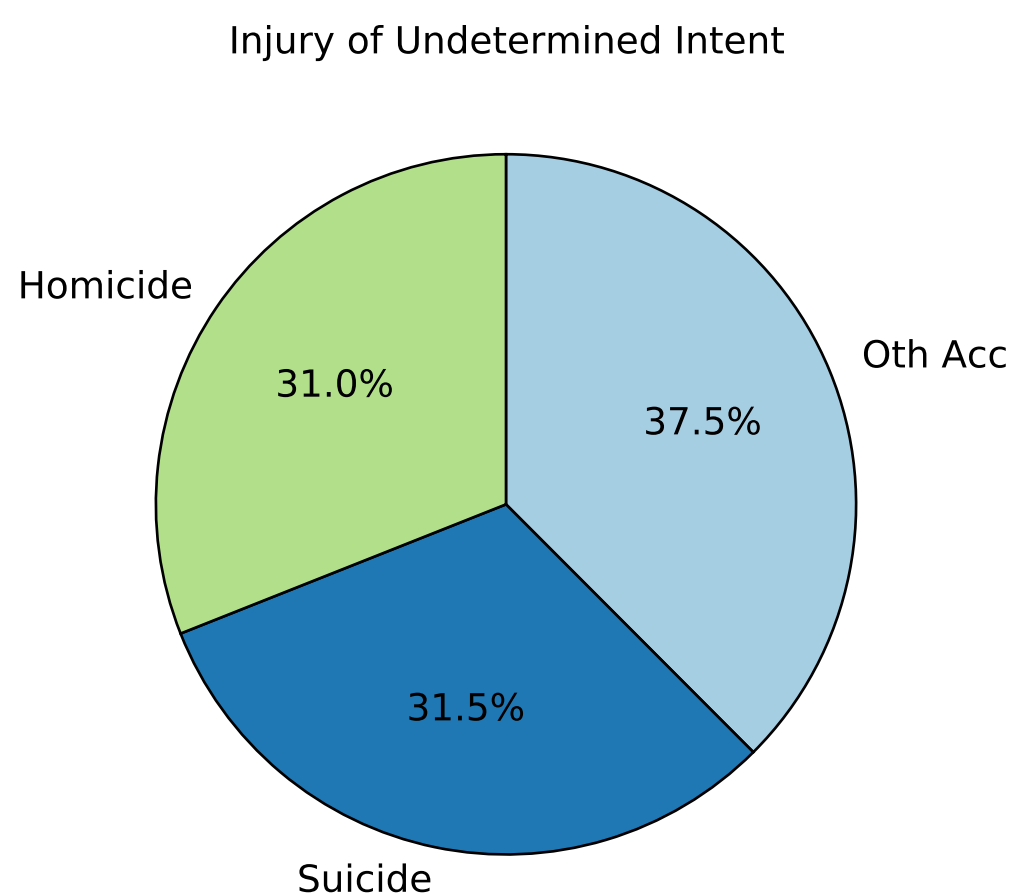

Ill-Defined Infectious Disease

ICD 9  
Male, Age 45

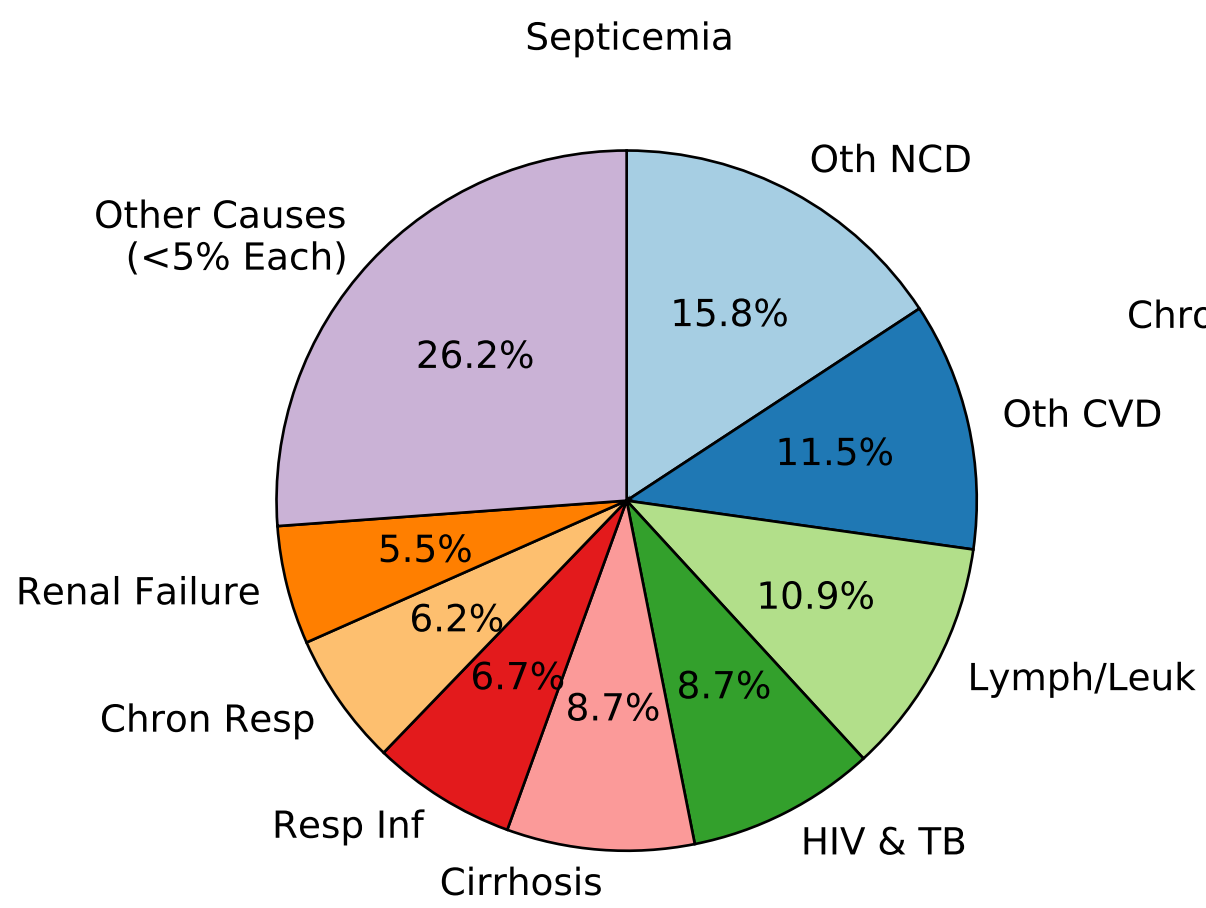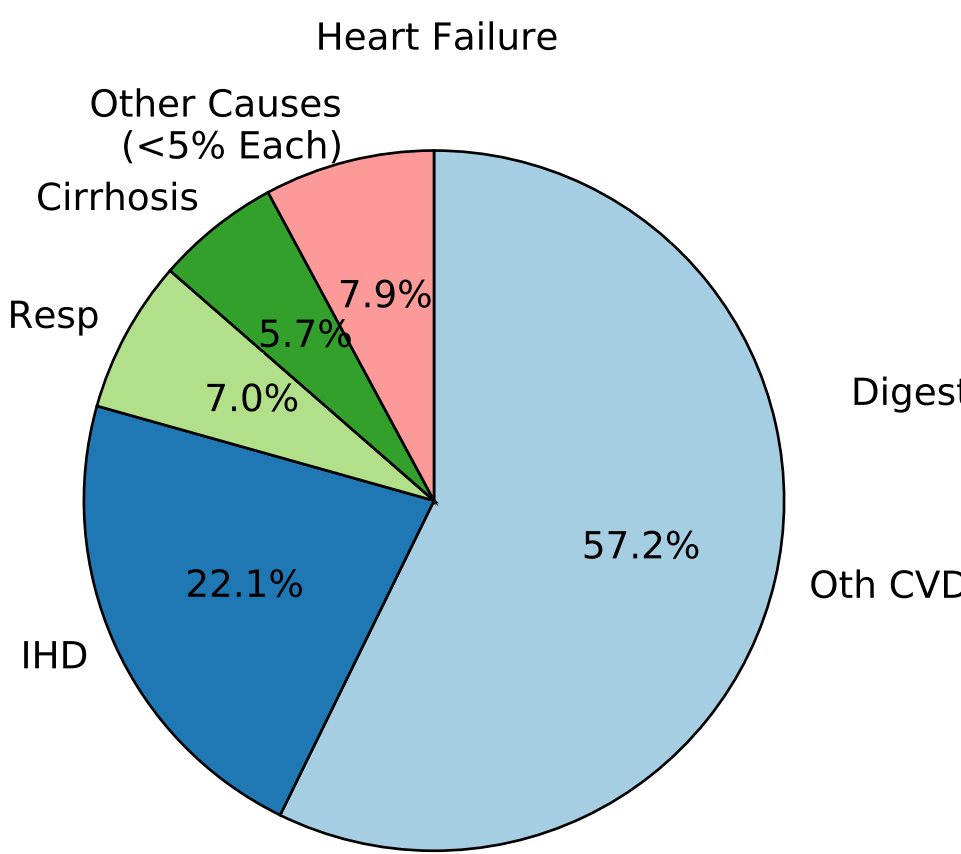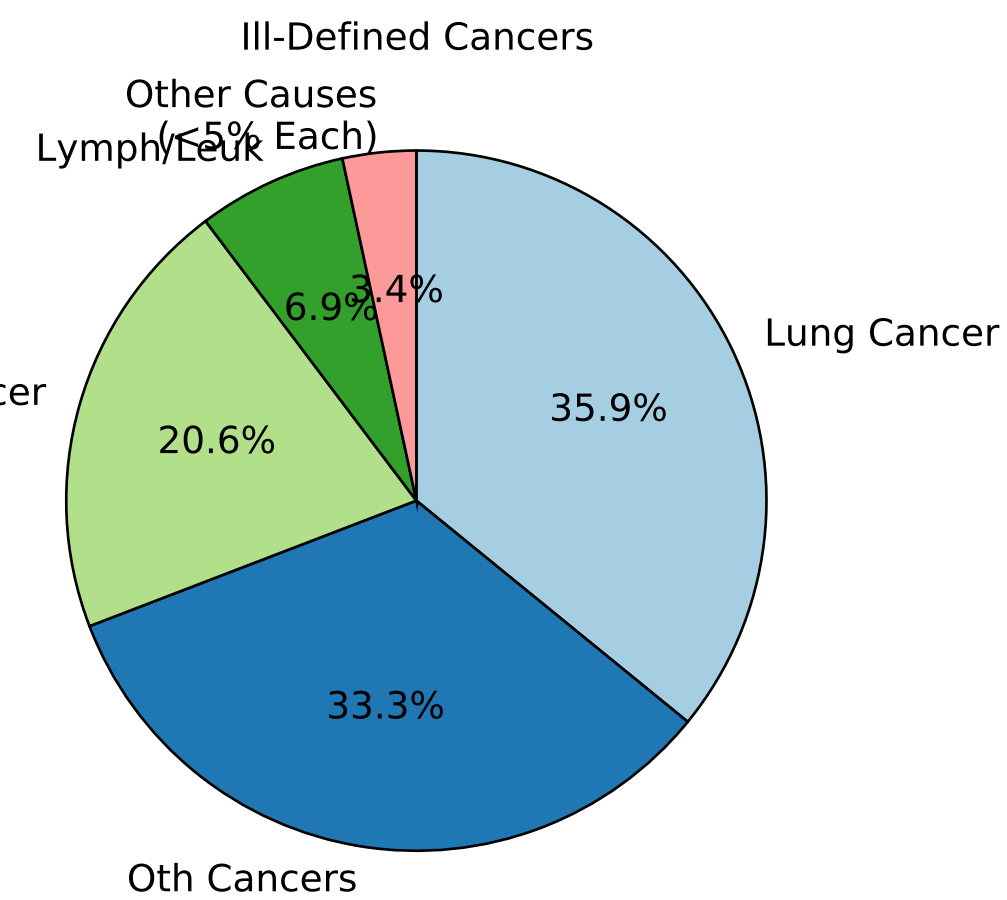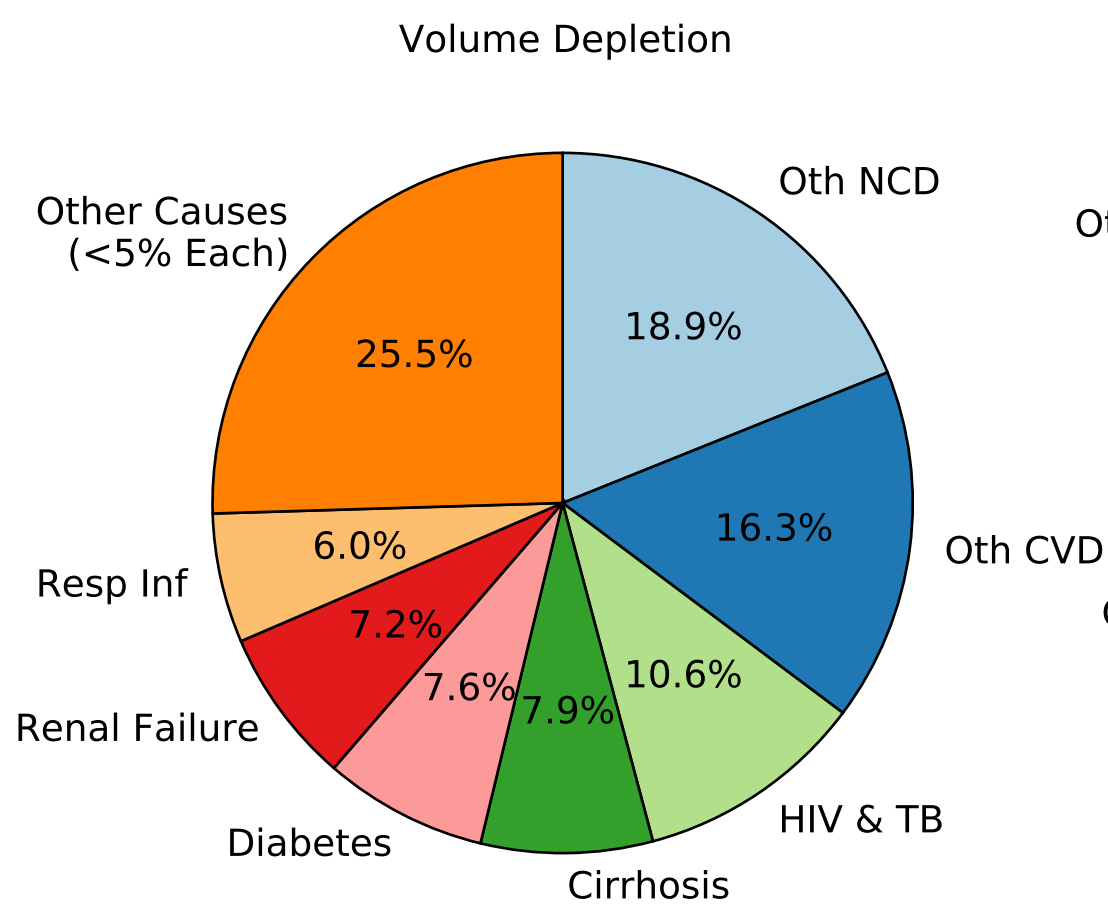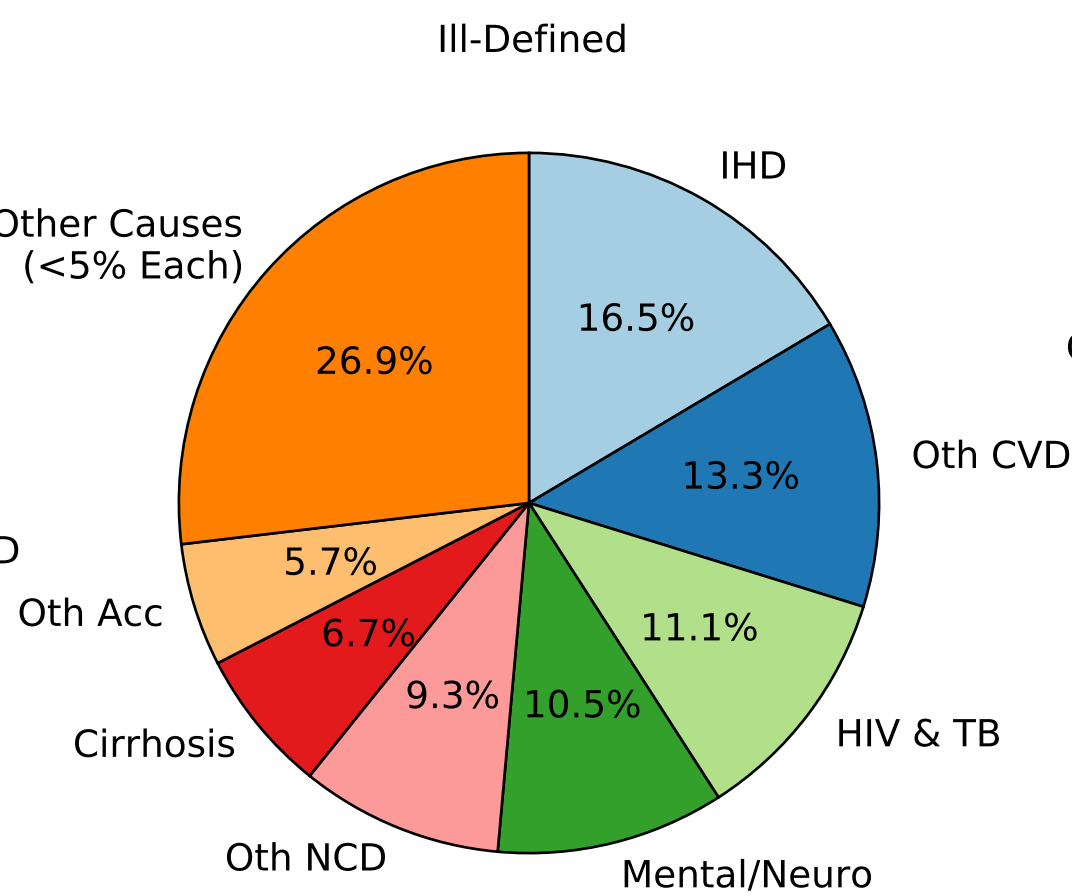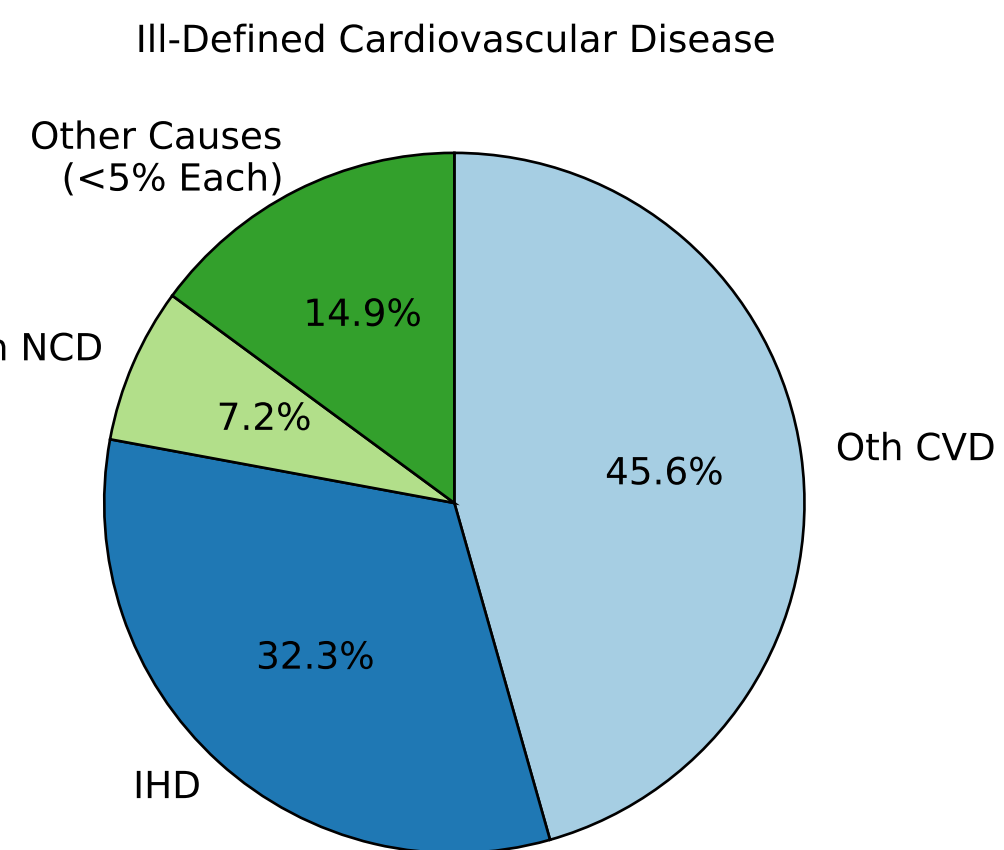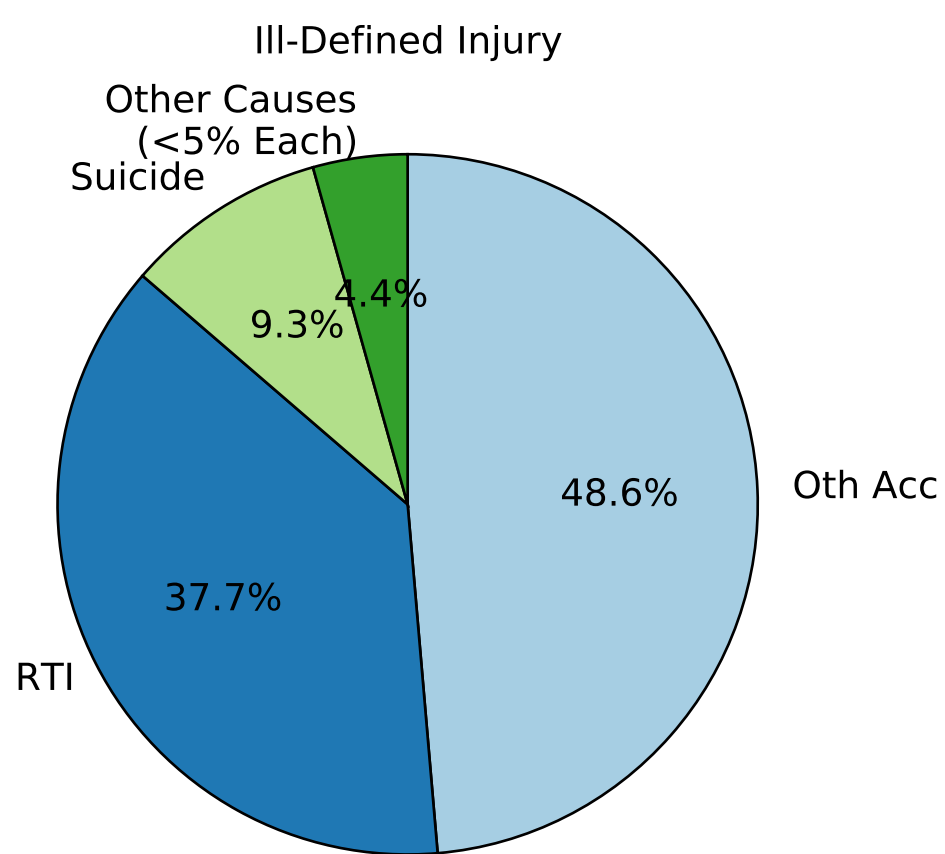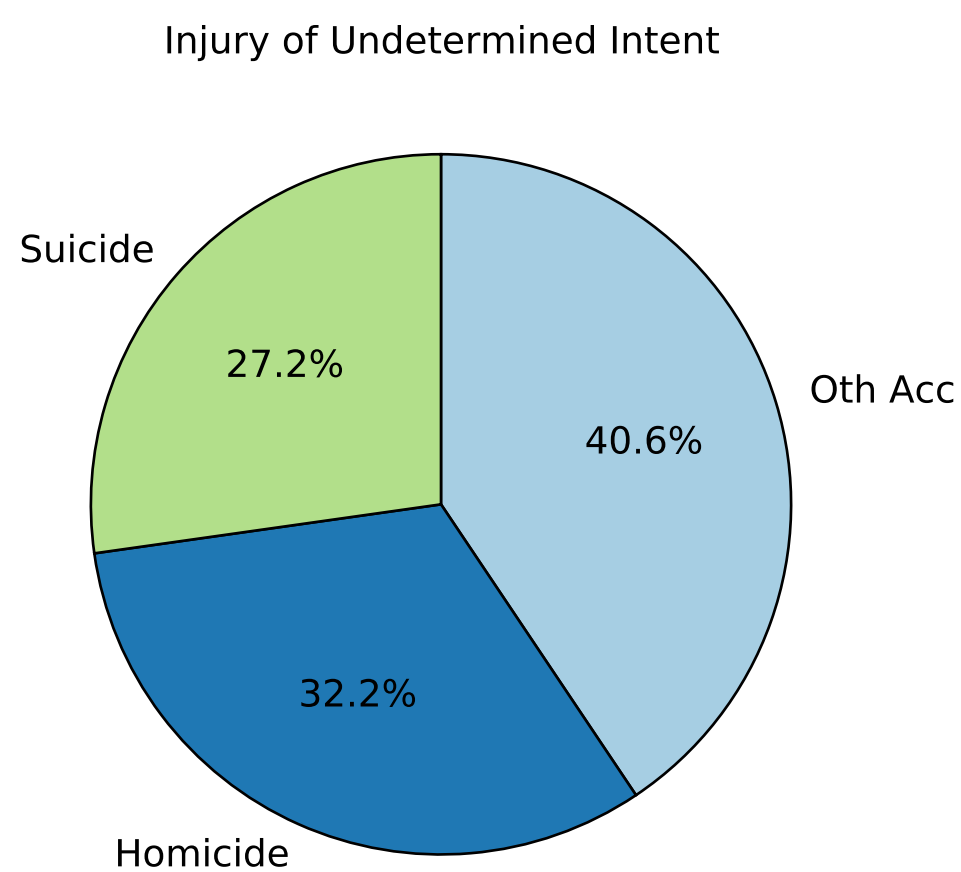

III-Defined Infectious Disease

ICD 9  
Male, Age 50

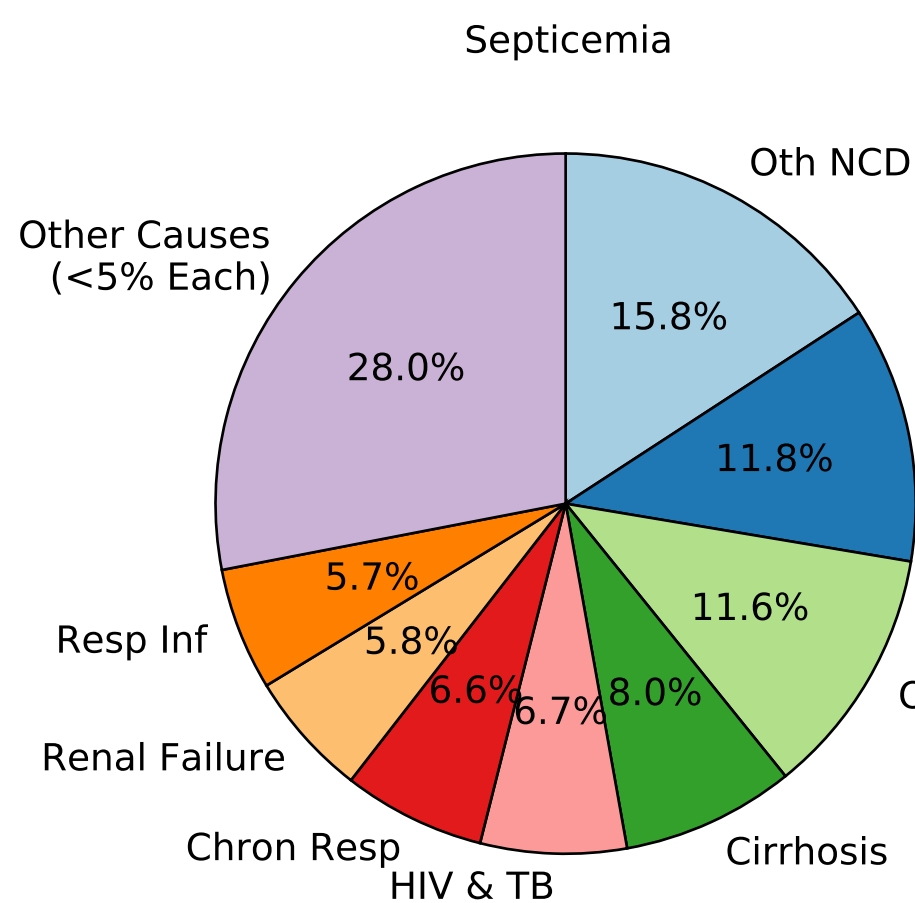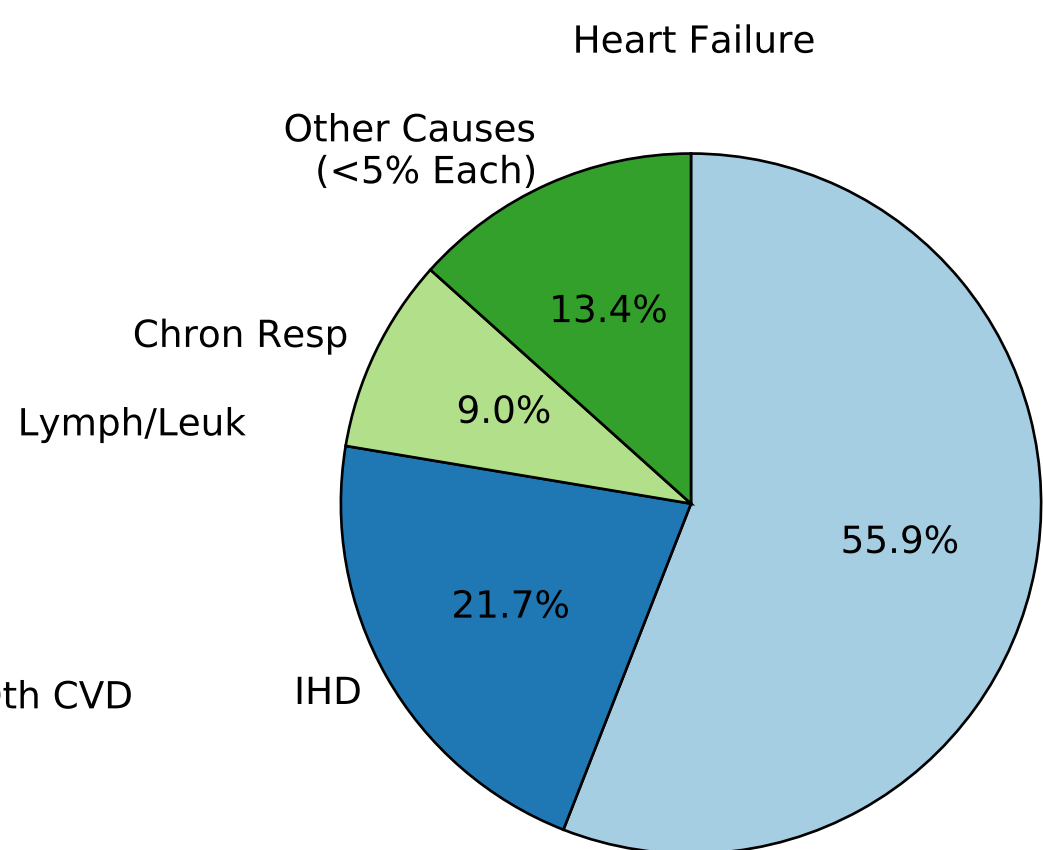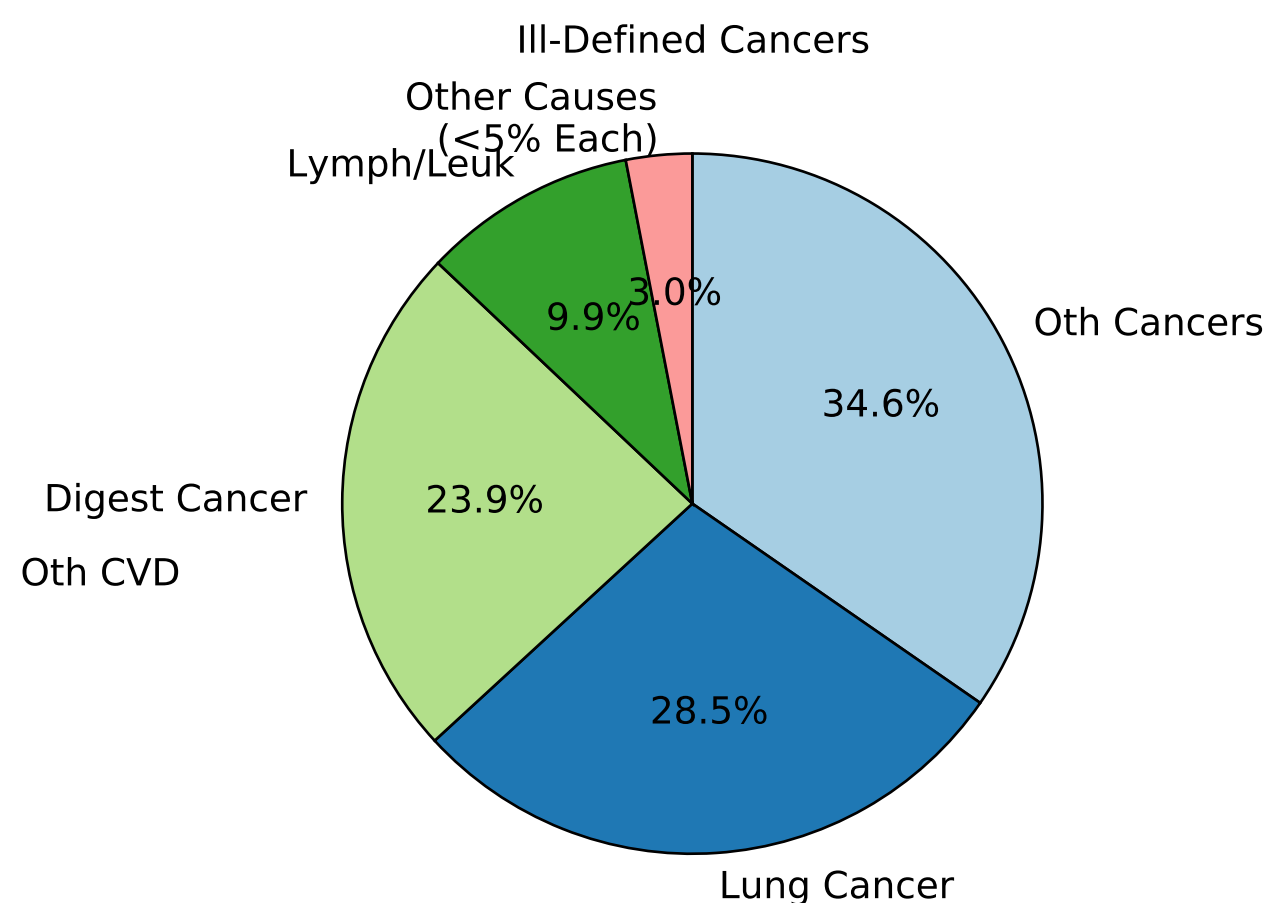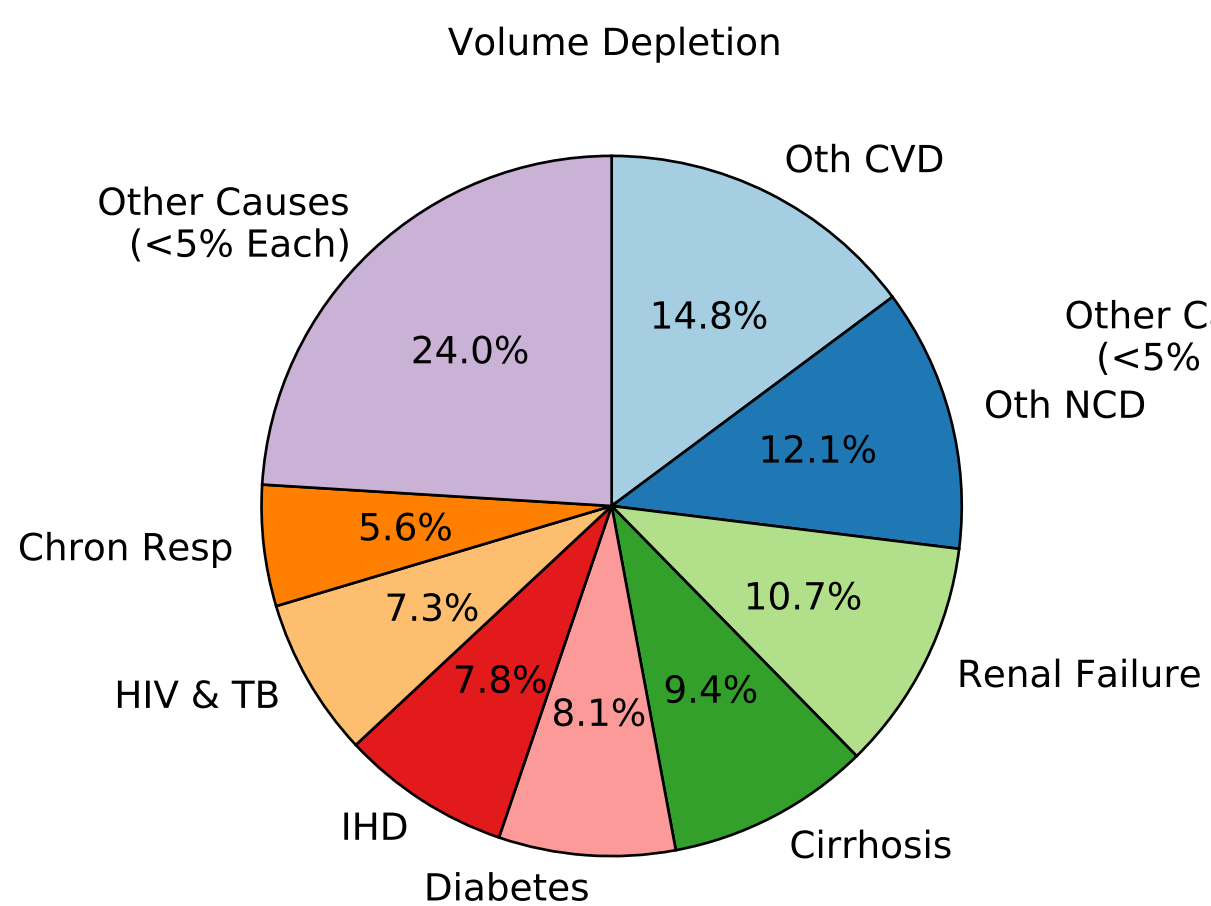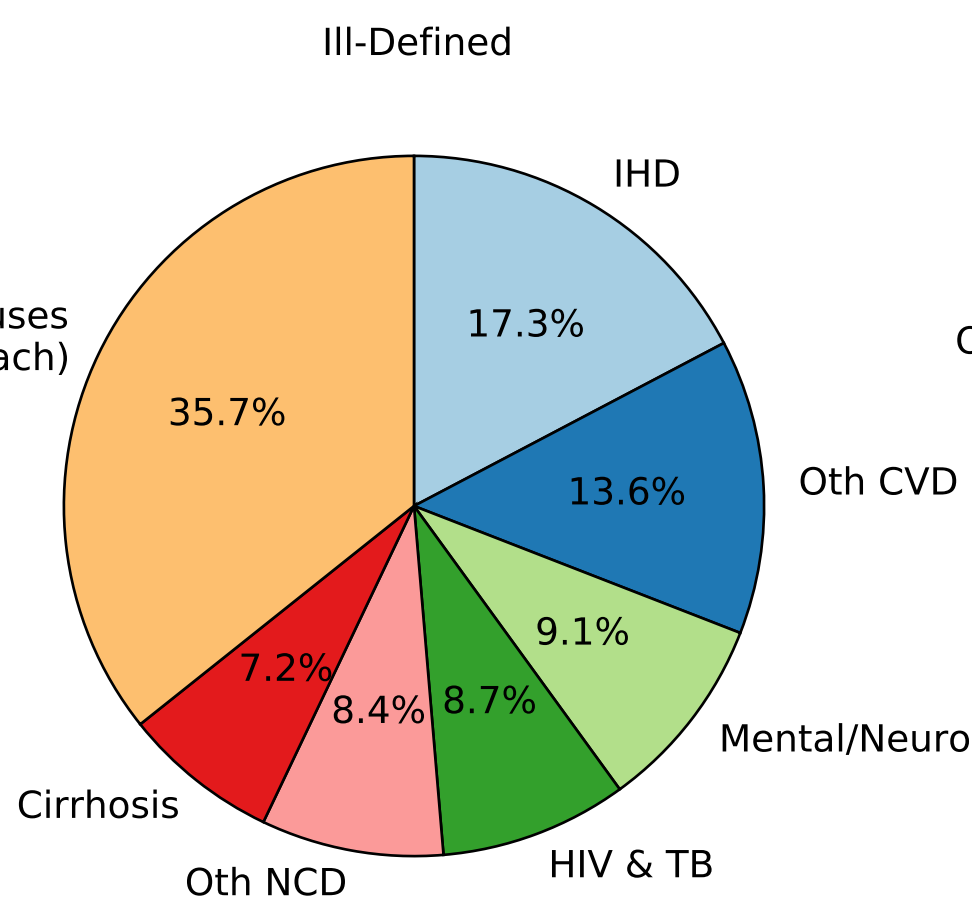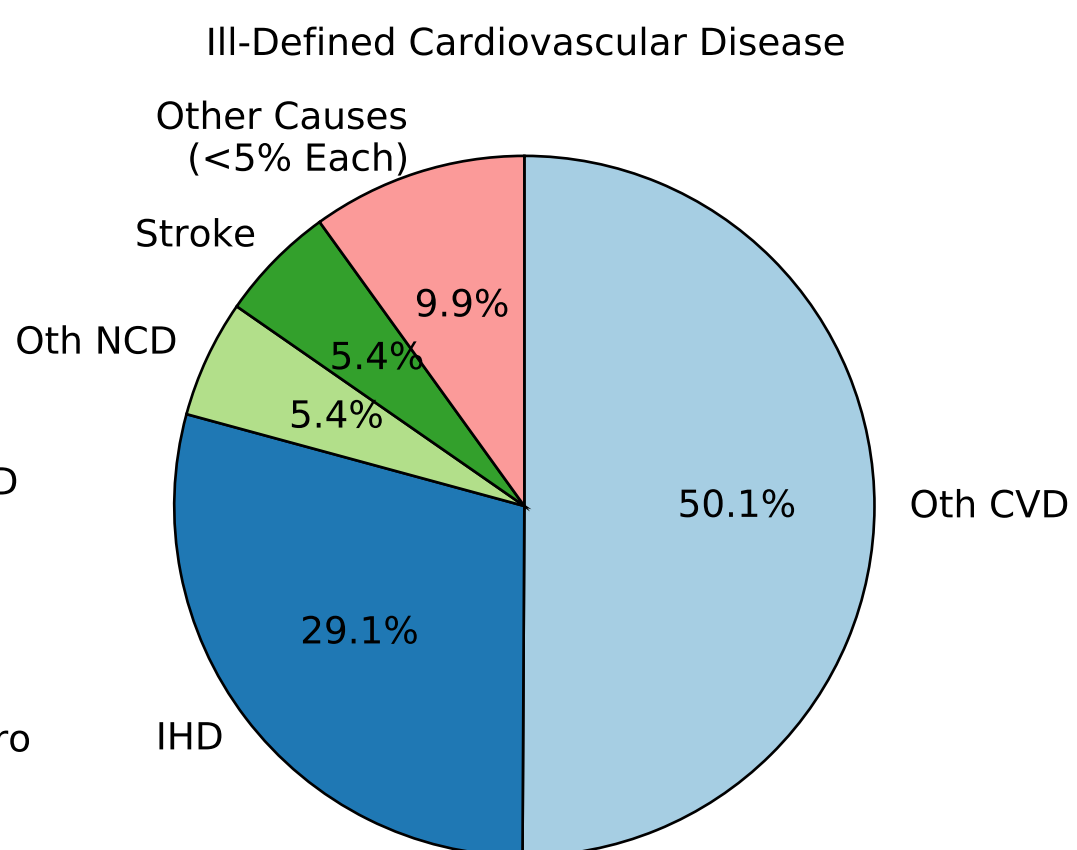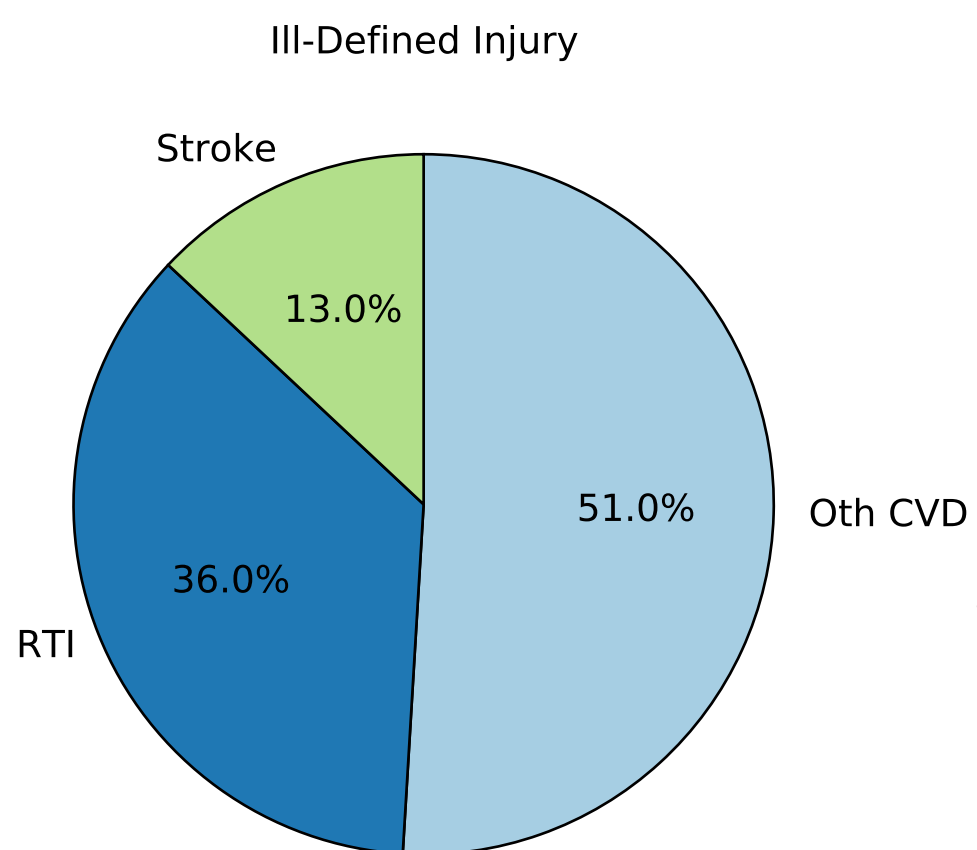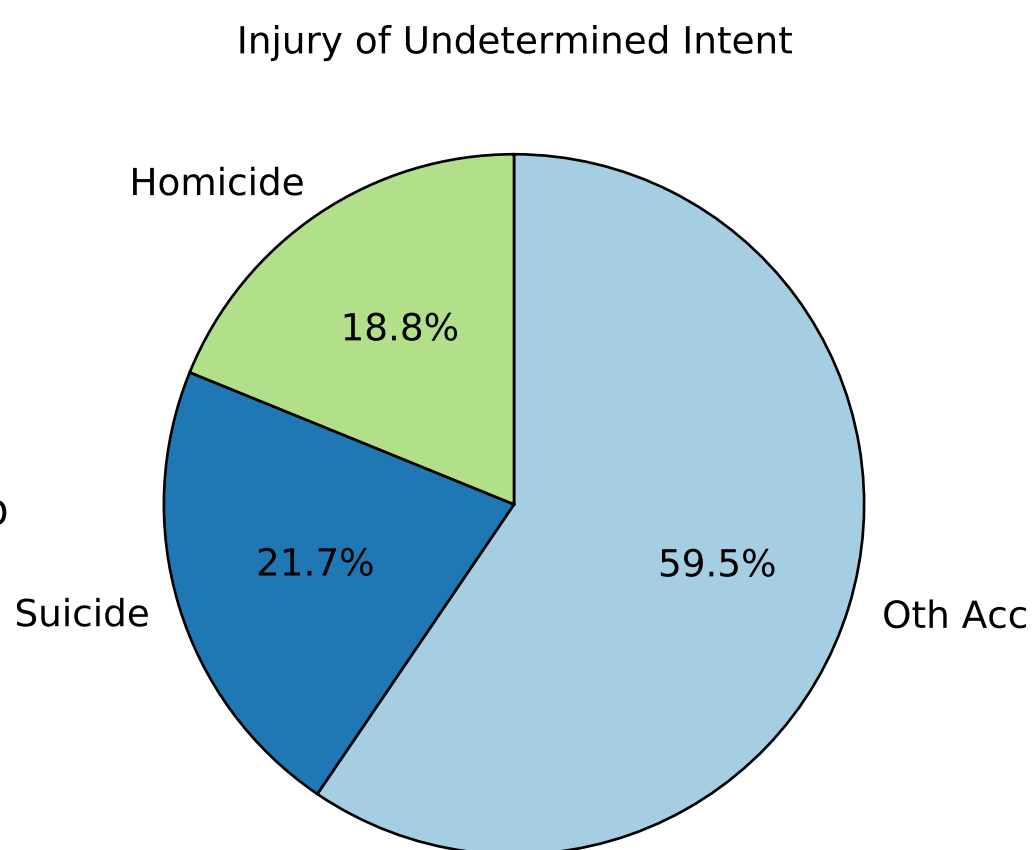

Ill-Defined Infectious Disease

ICD 9  
Male, Age 55

Septicemia

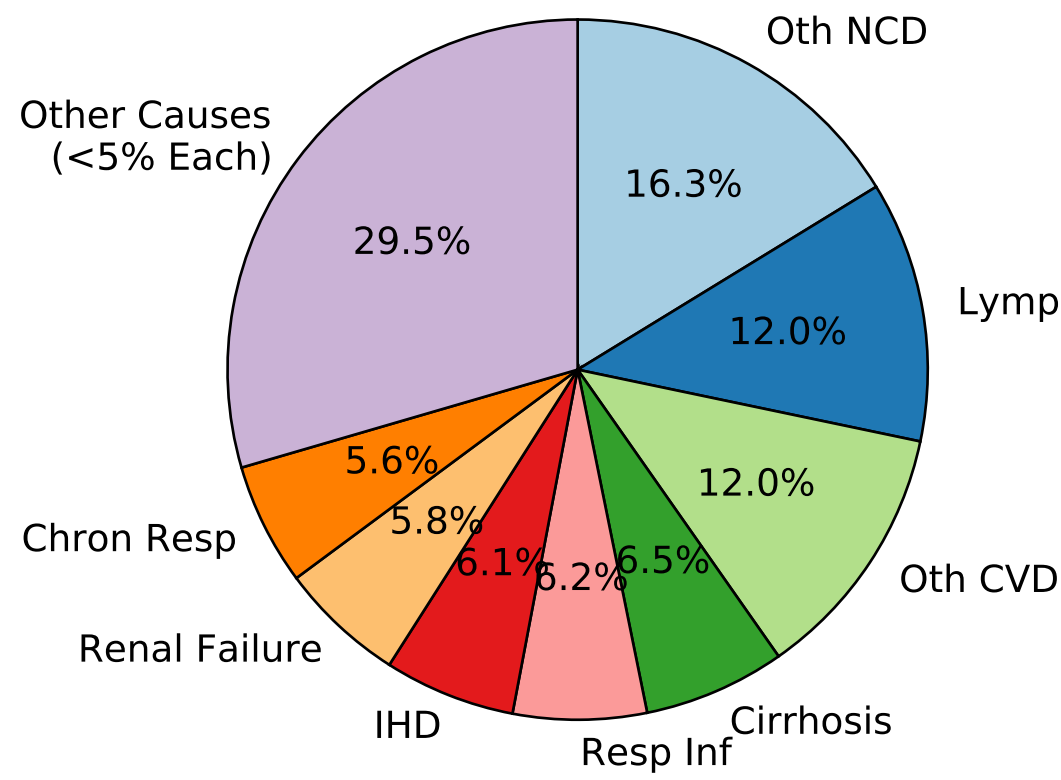

Heart Failure

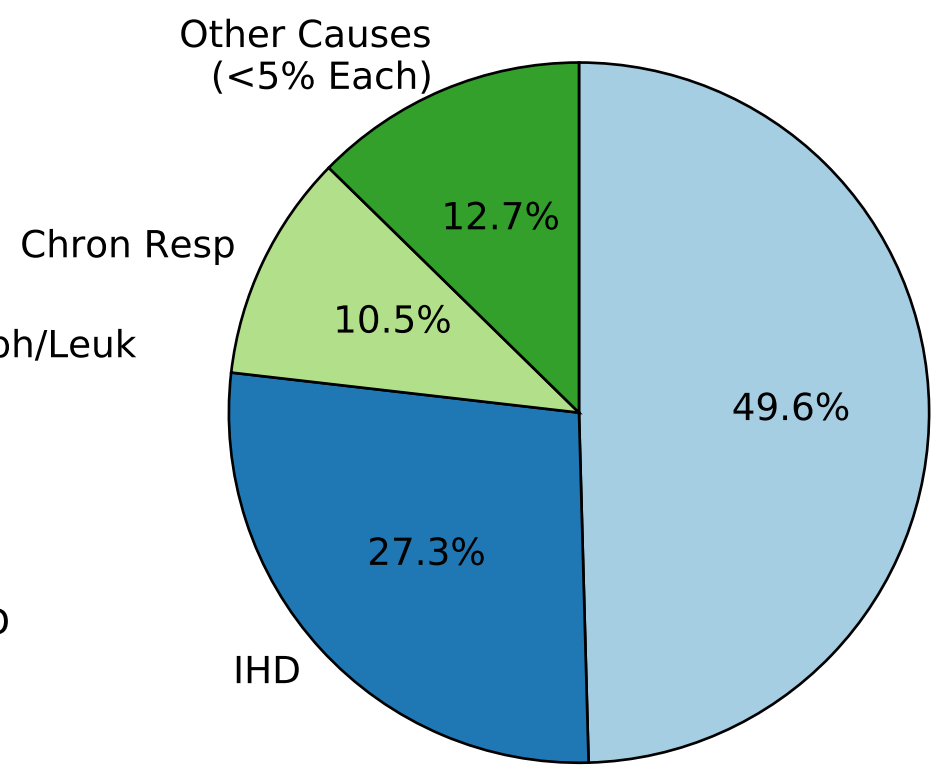

III-Defined Cancers

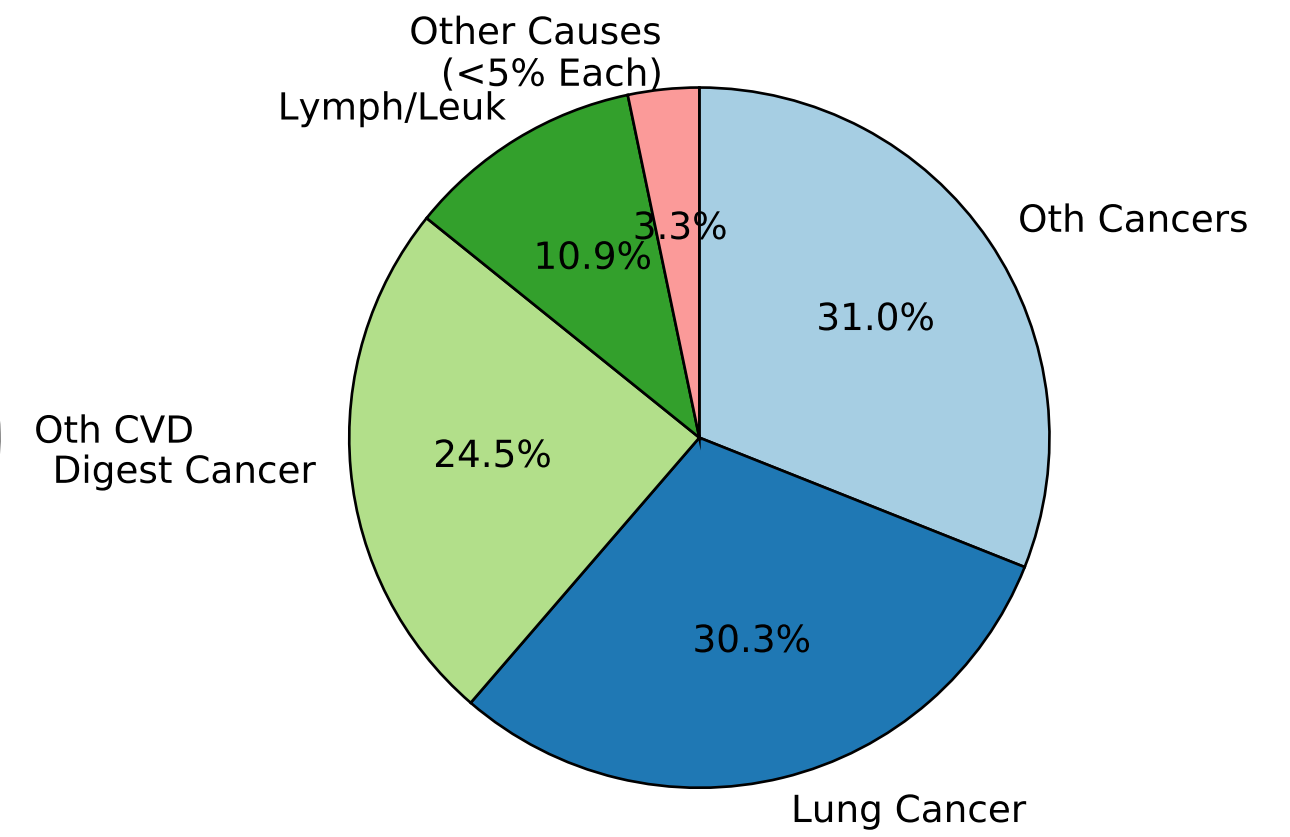

Volume Depletion

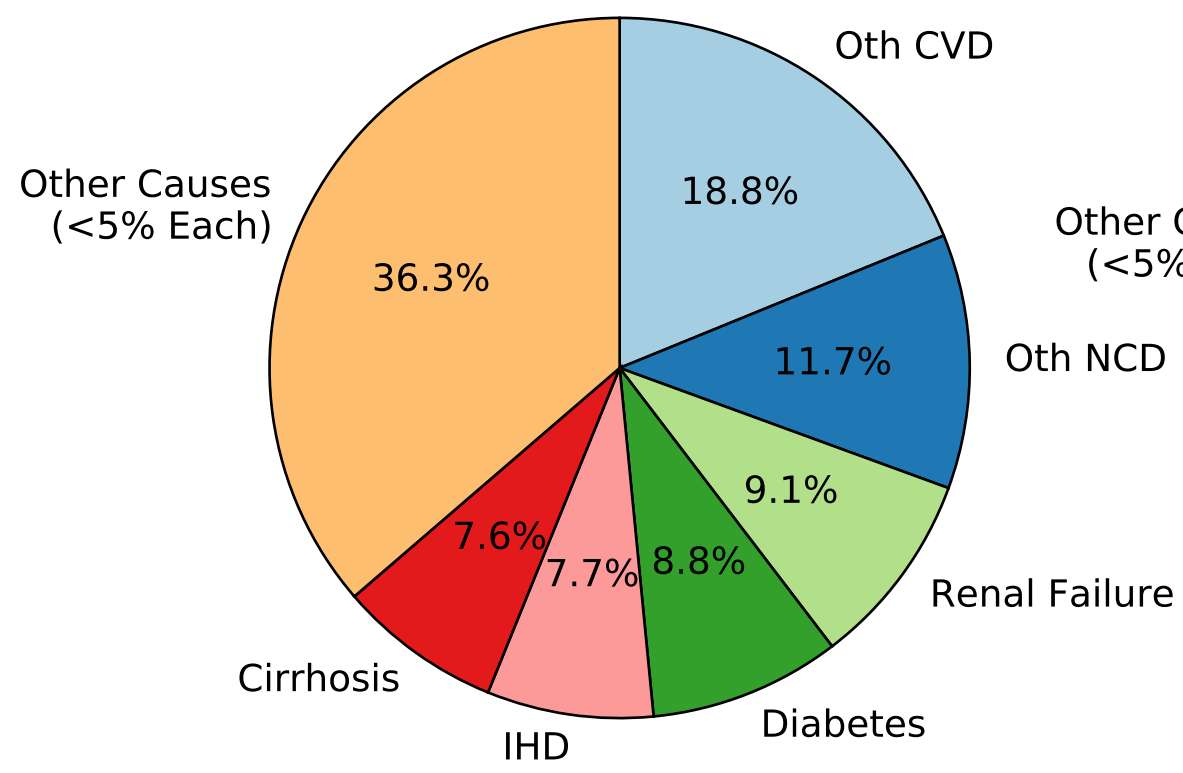

III-Defined

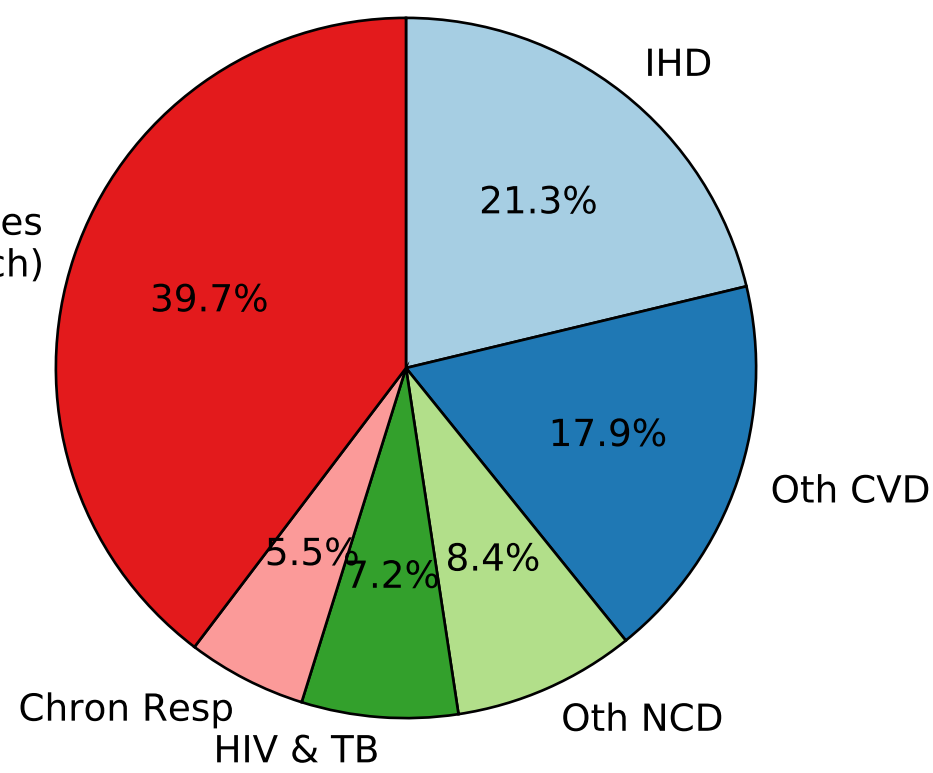

III-Defined Cardiovascular Disease

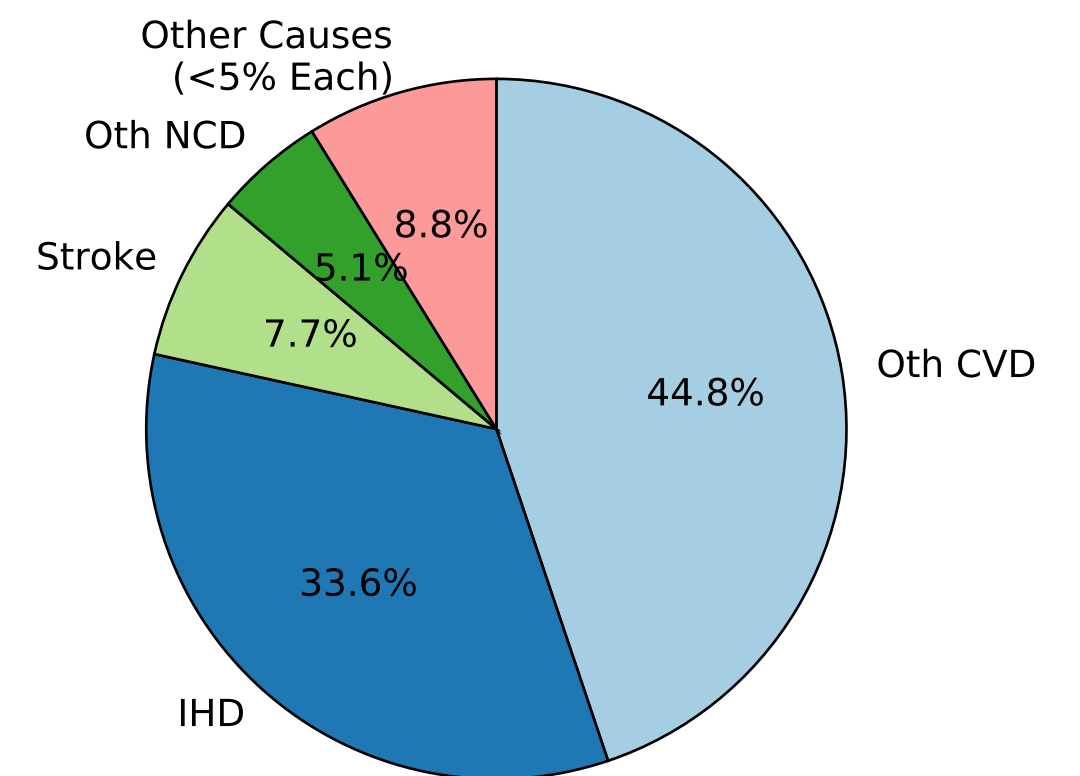

III-Defined Injury

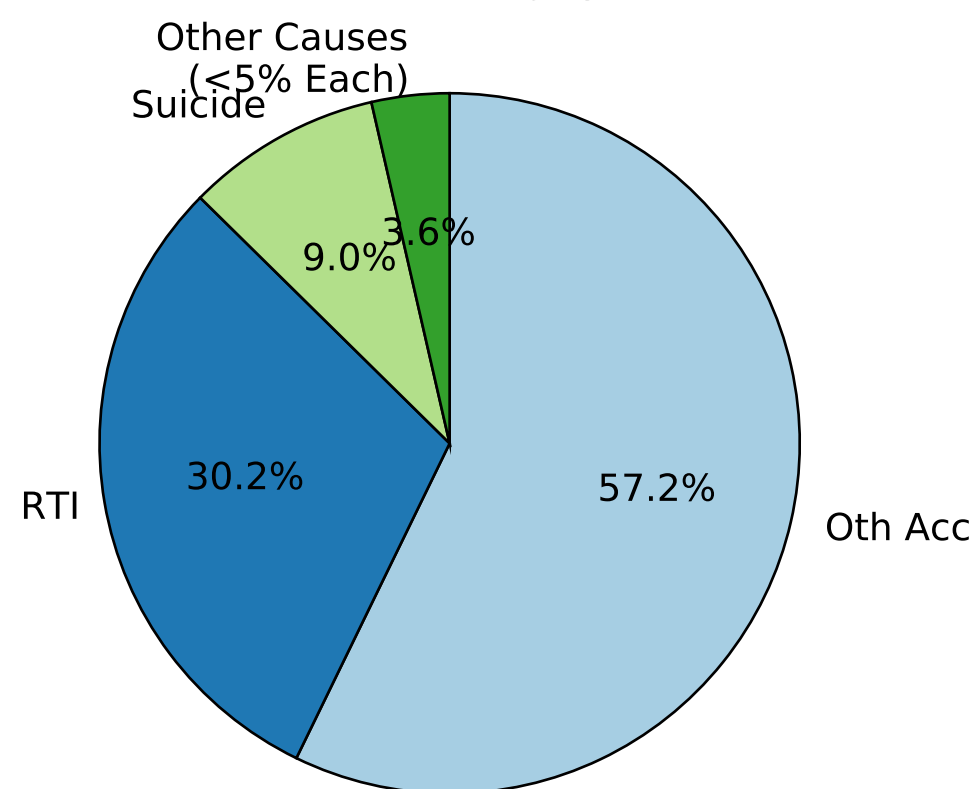

Injury of Undetermined Intent

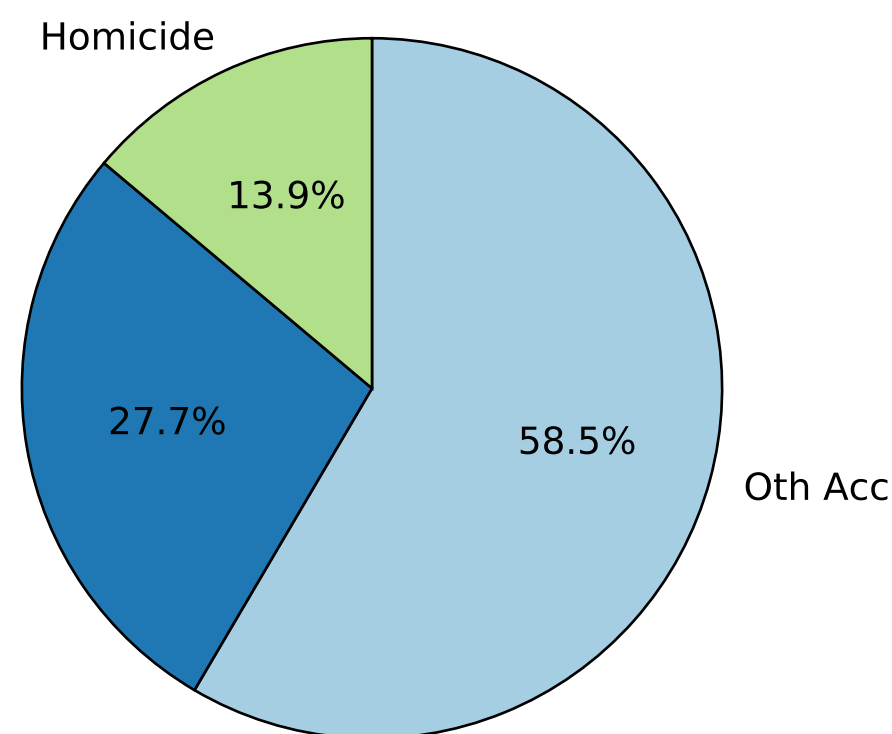

III-Defined Infectious Disease

ICD 9  
Male, Age 60

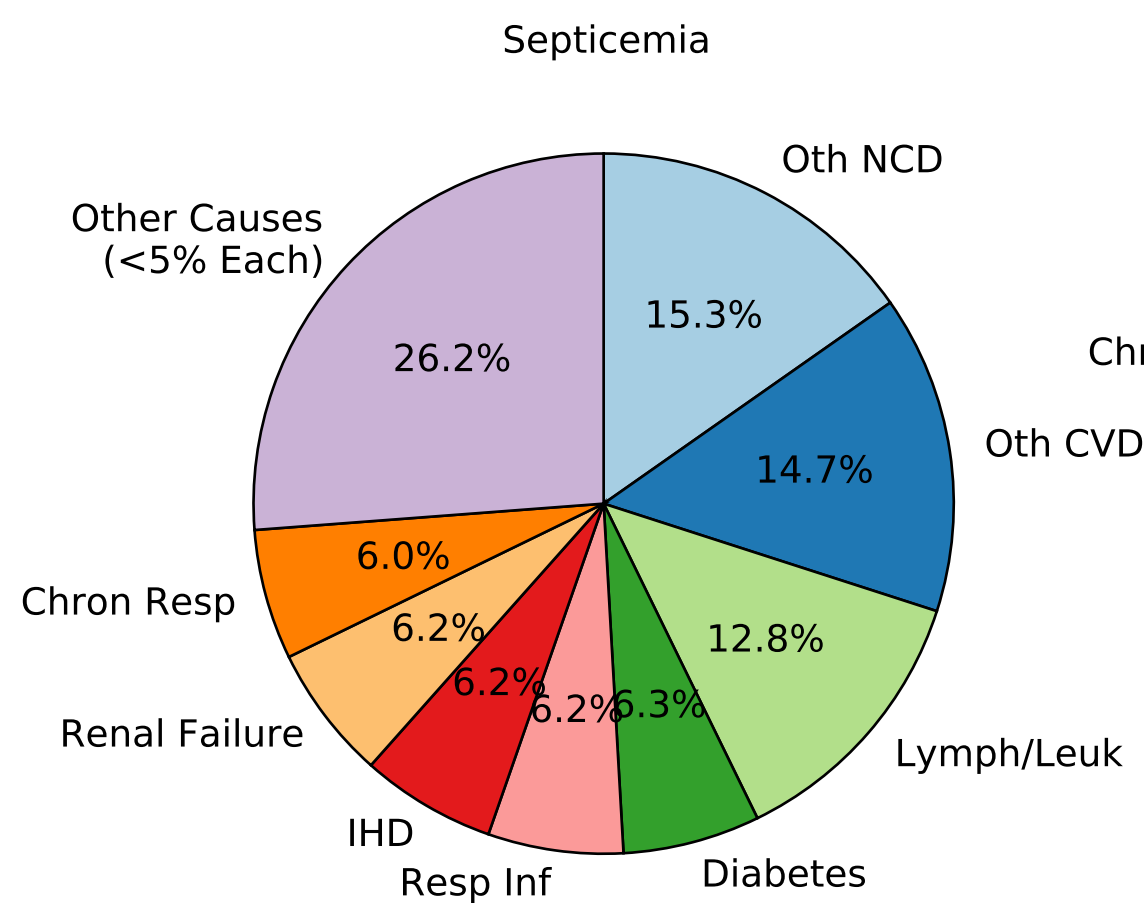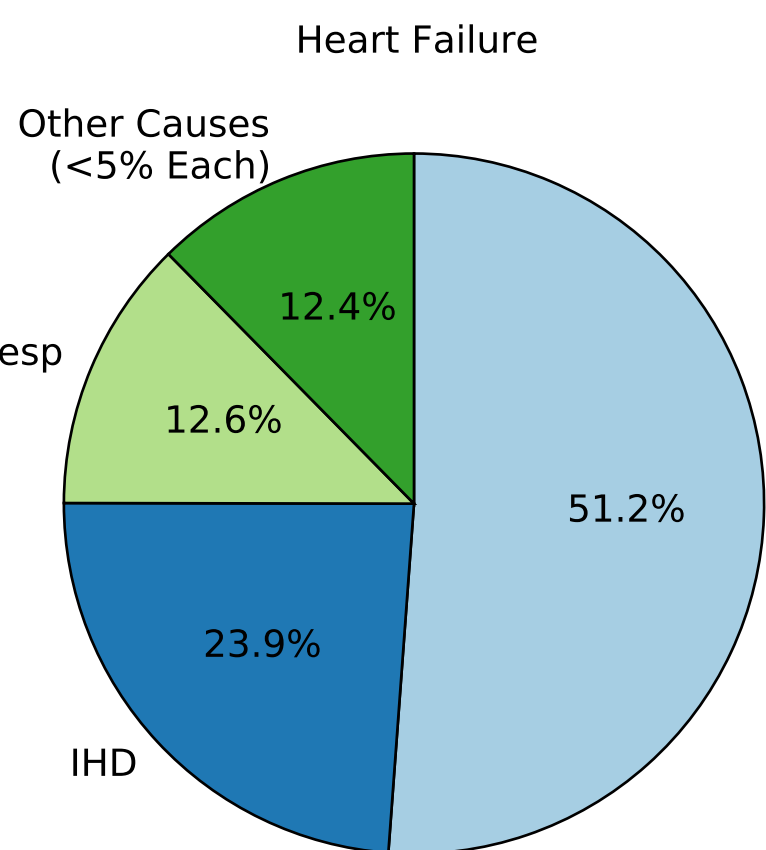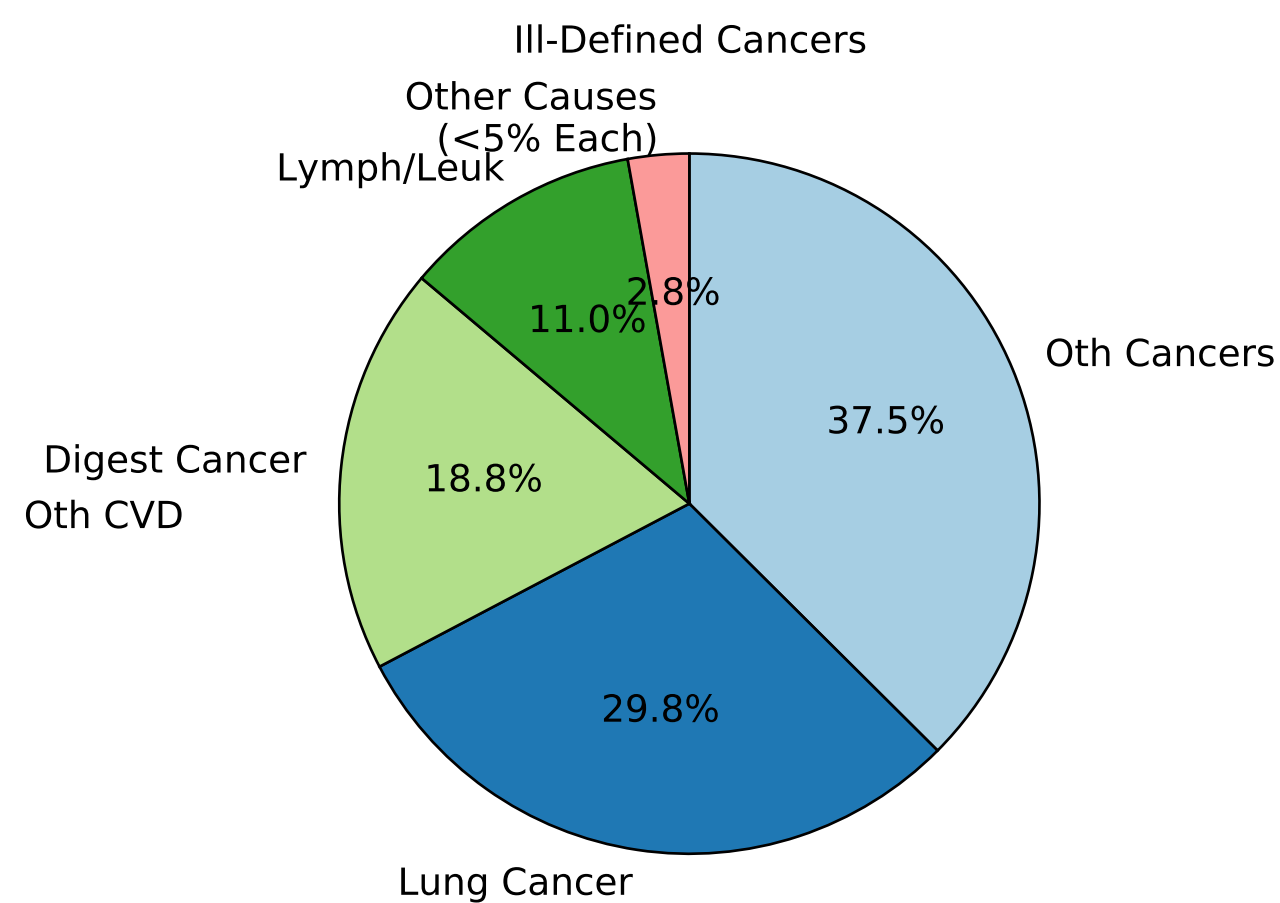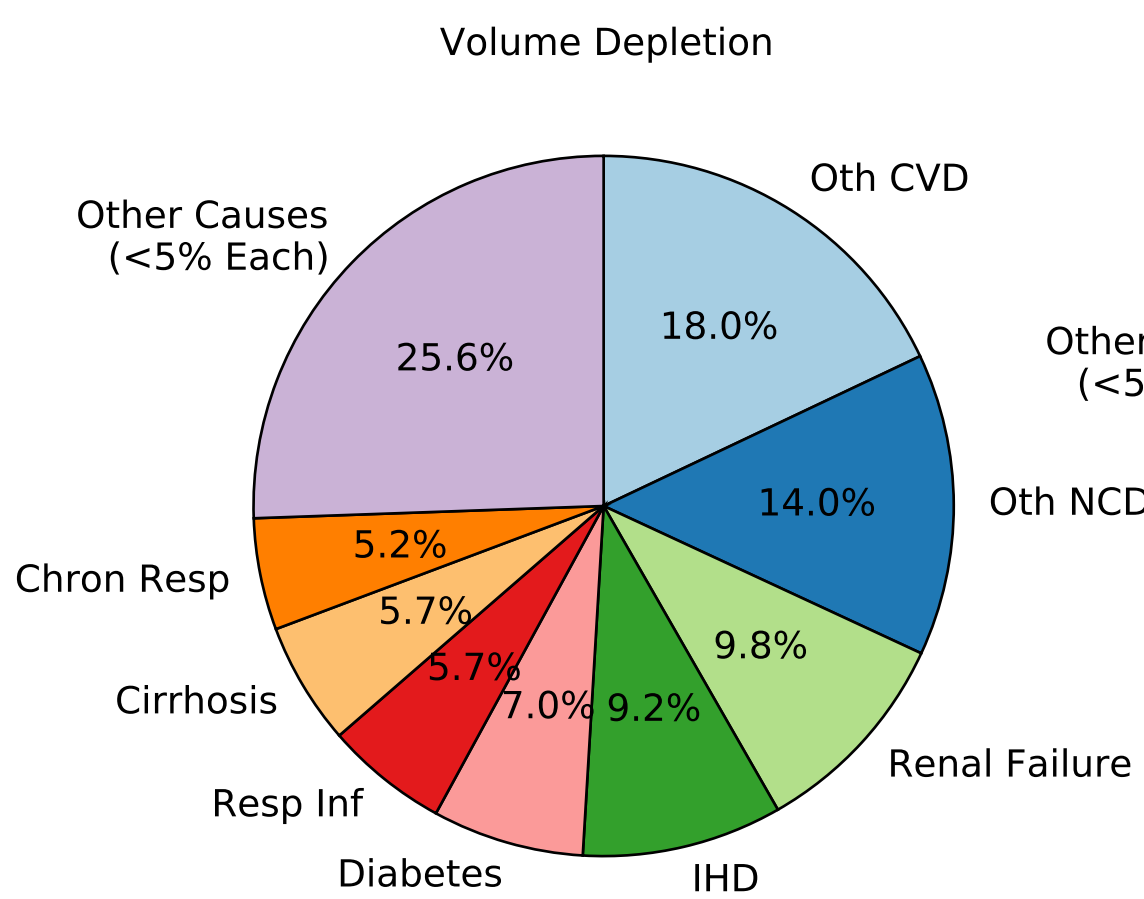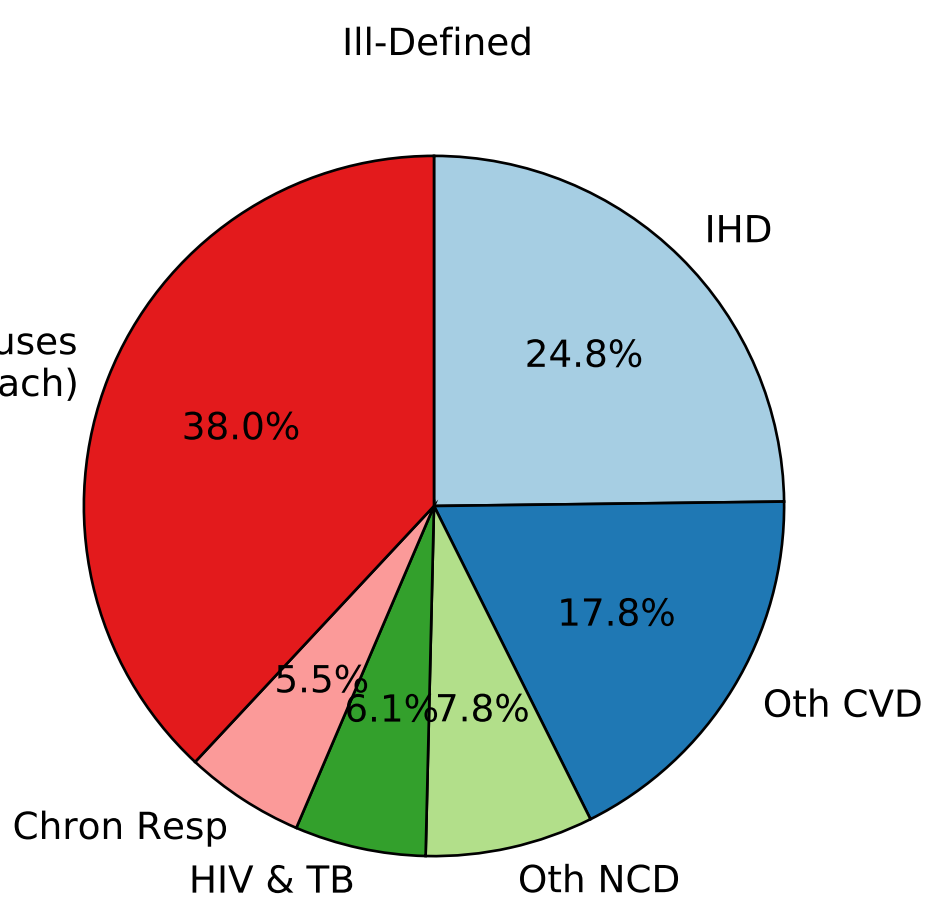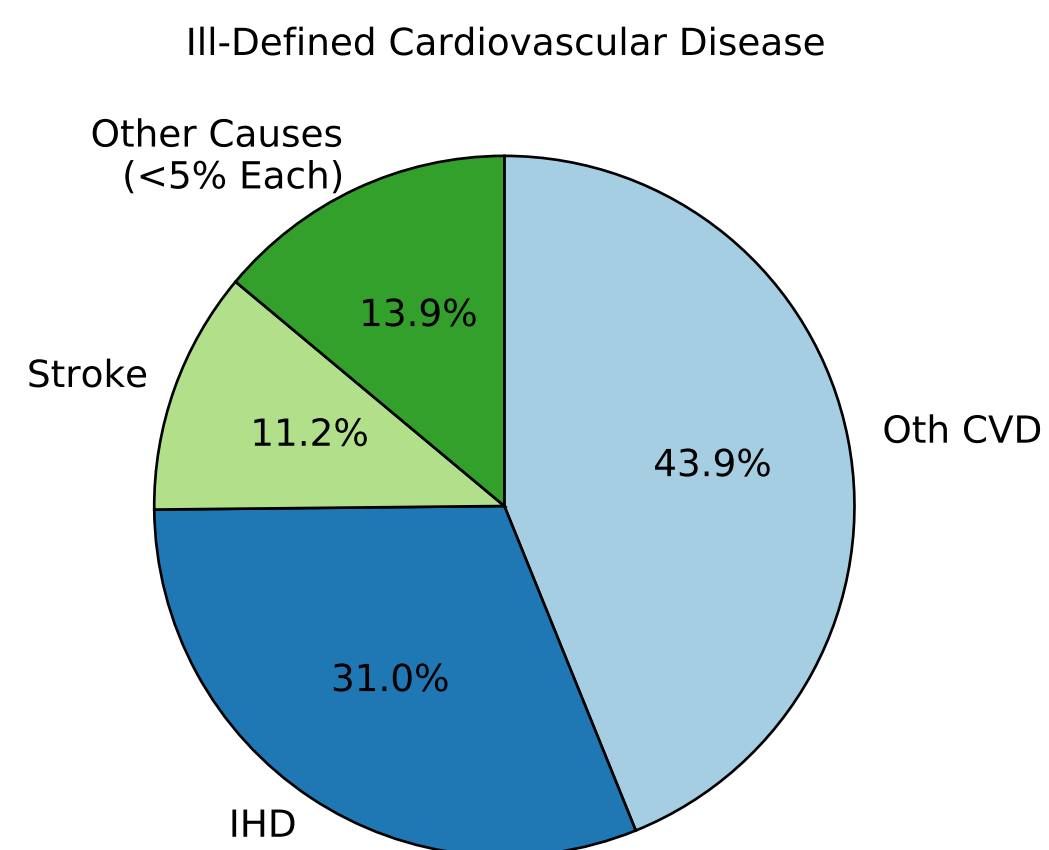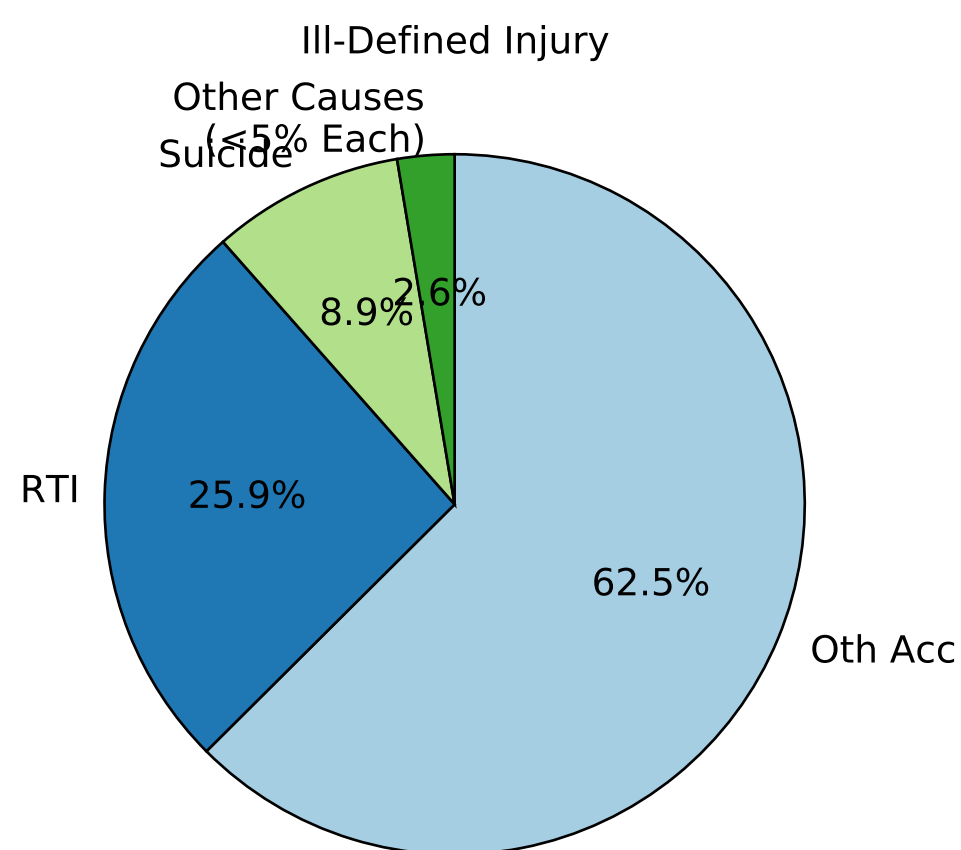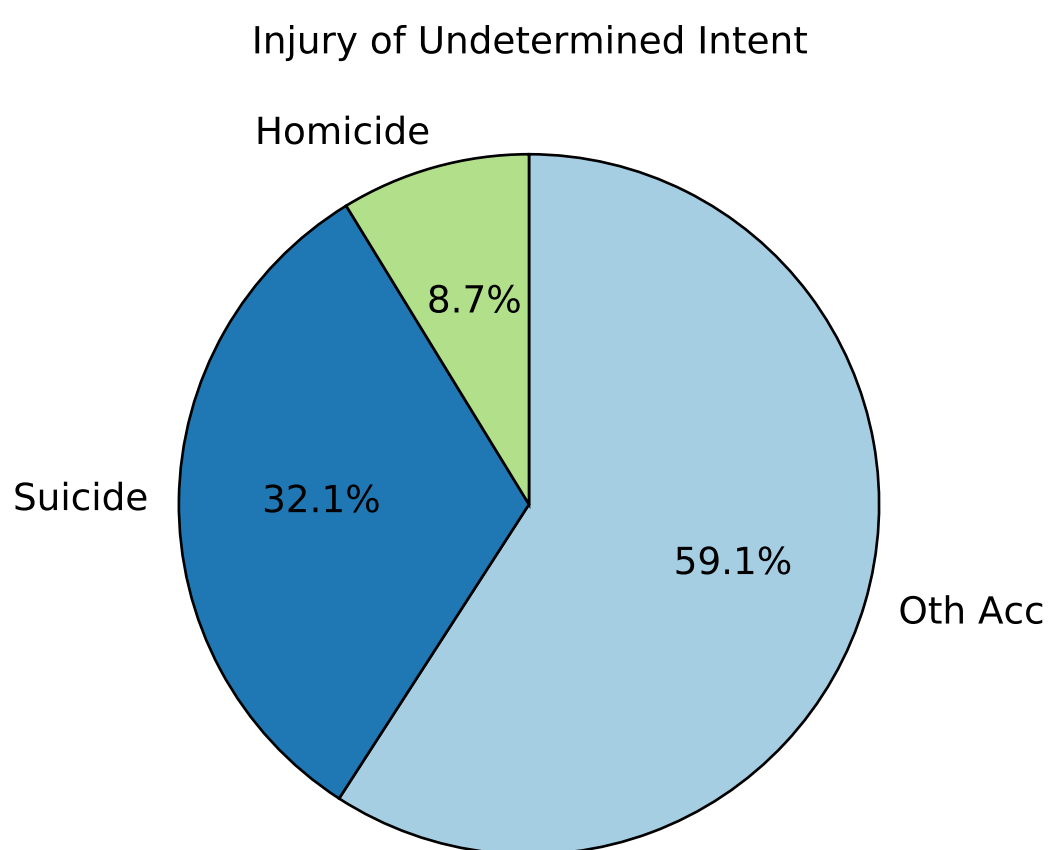

Ill-Defined Infectious Disease

ICD 9  
Male, Age 65

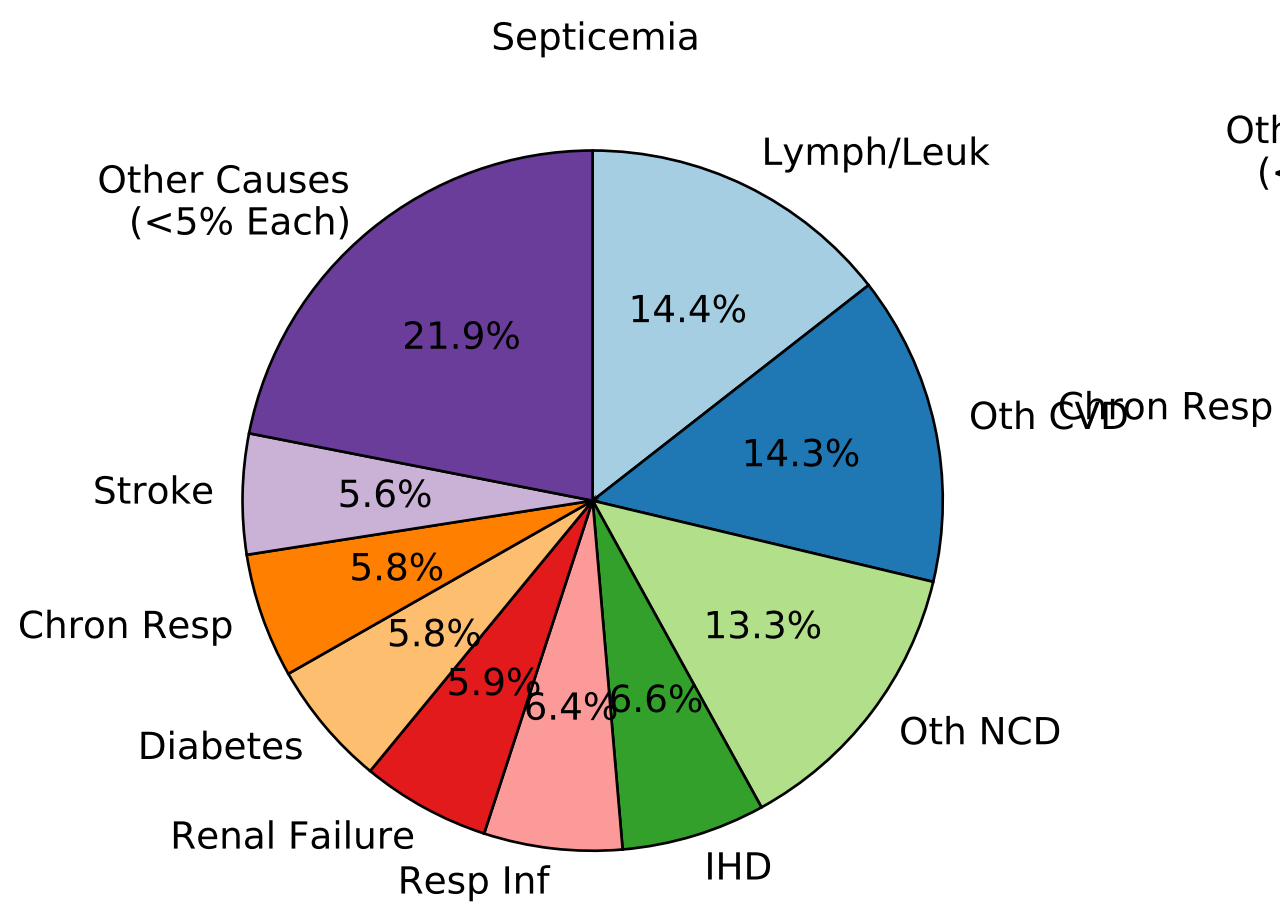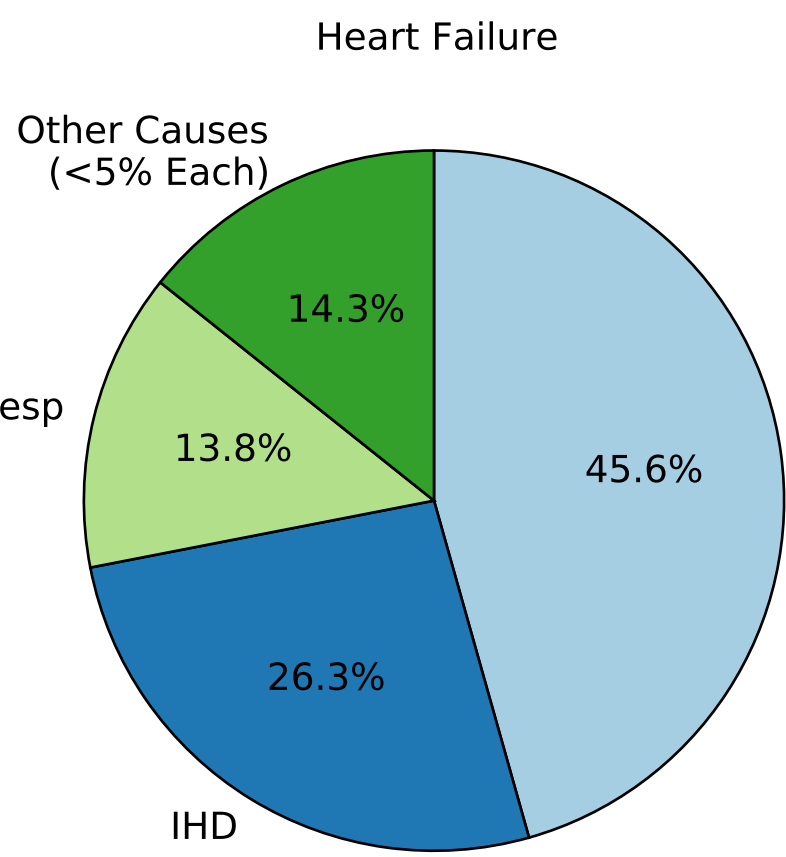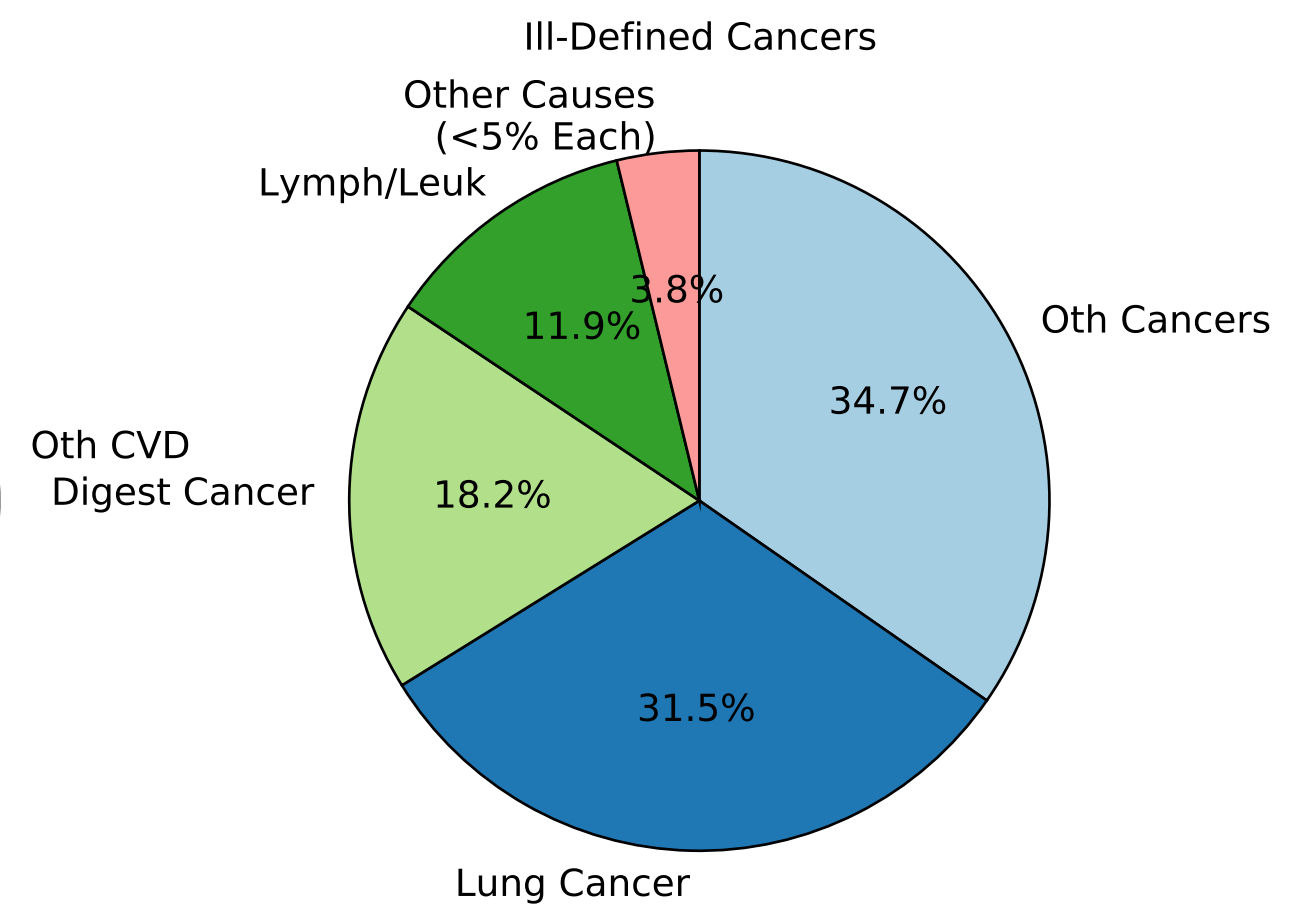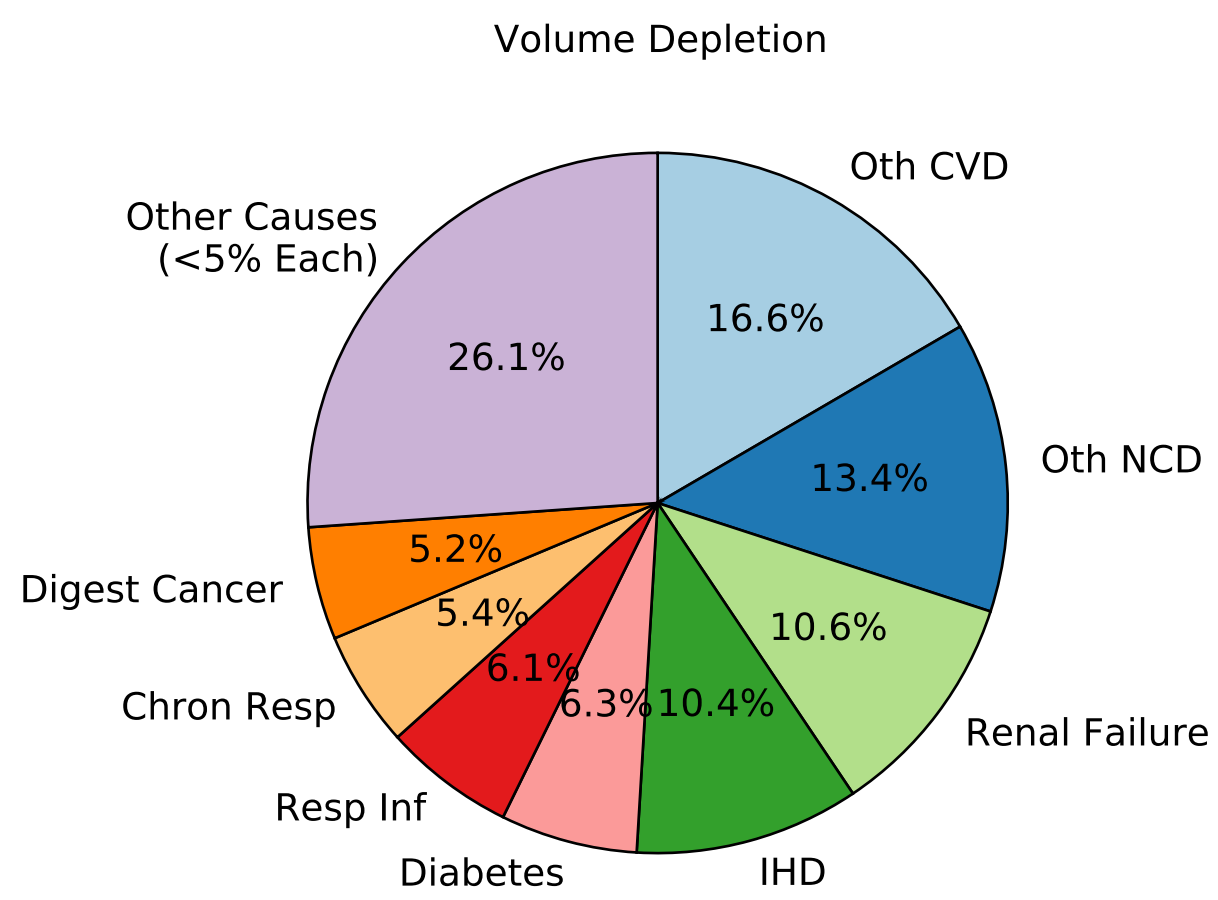

### Ill-Defined

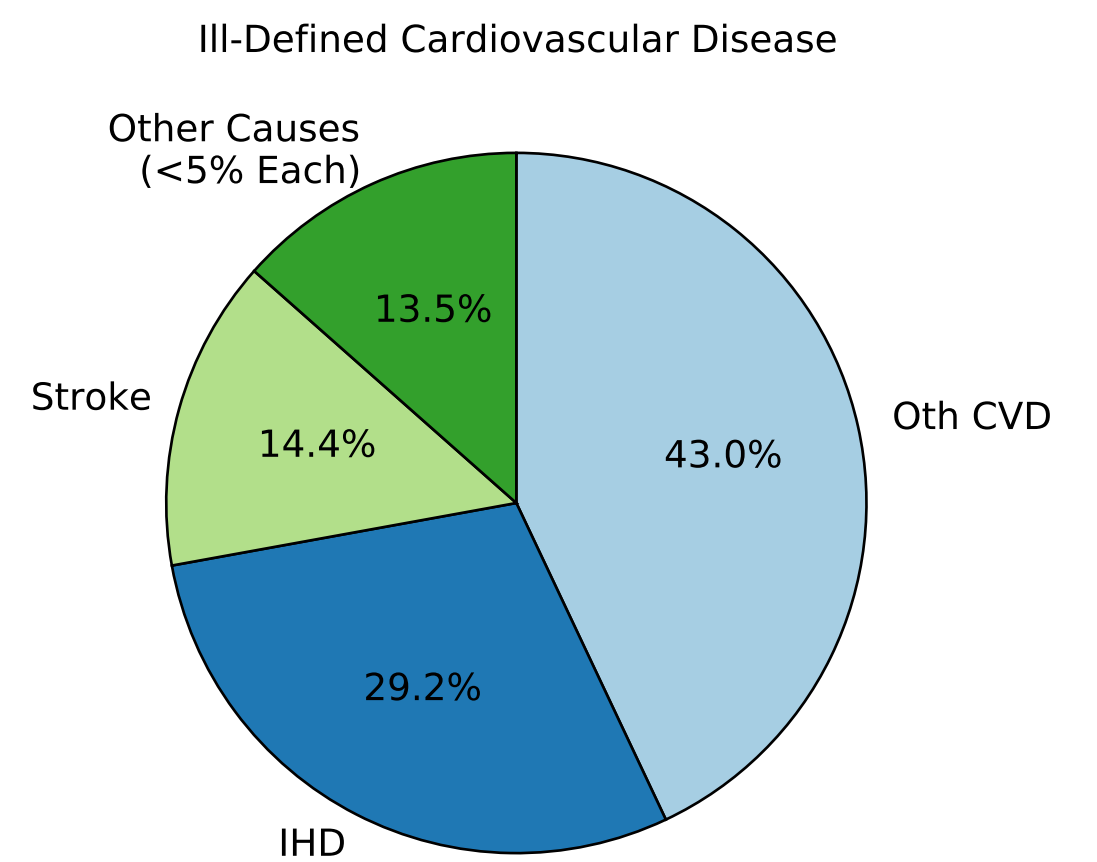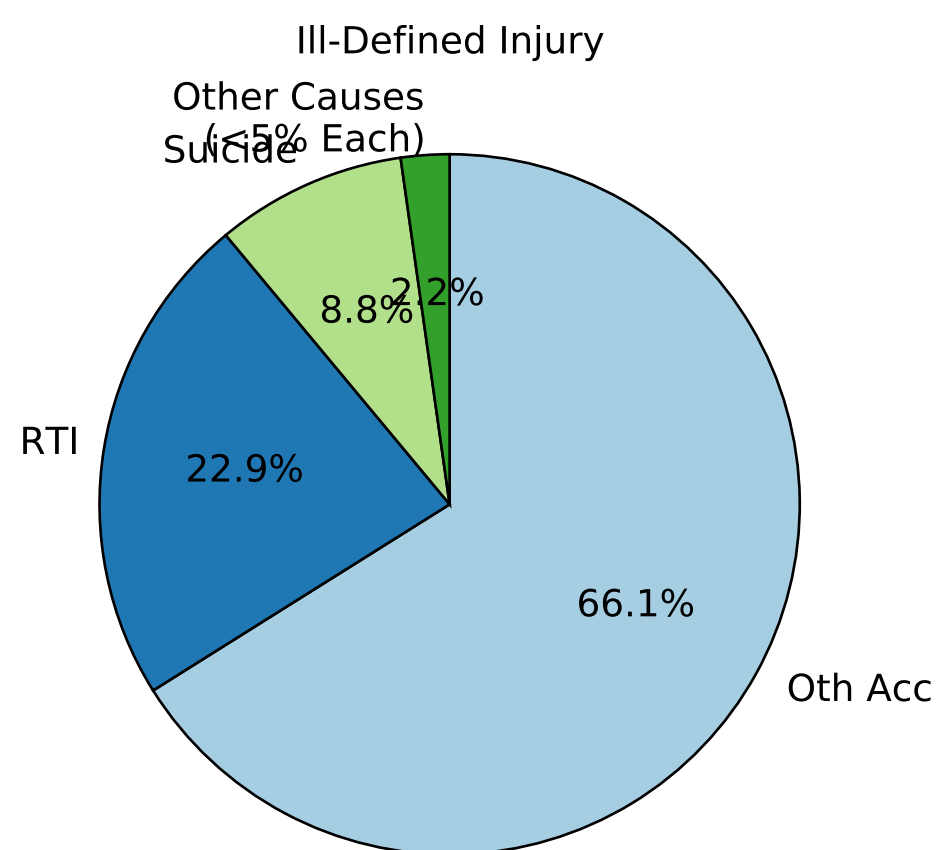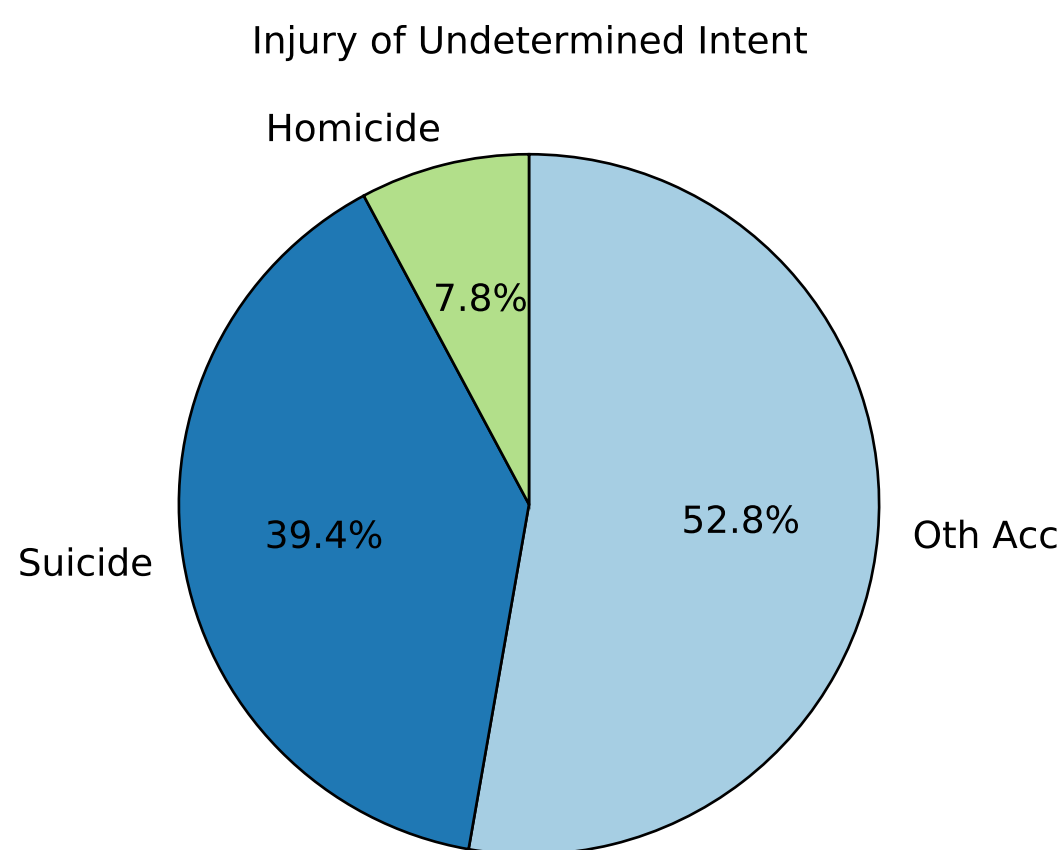

### Ill-Defined Infectious Disease



ICD 9  
Male, Age 70

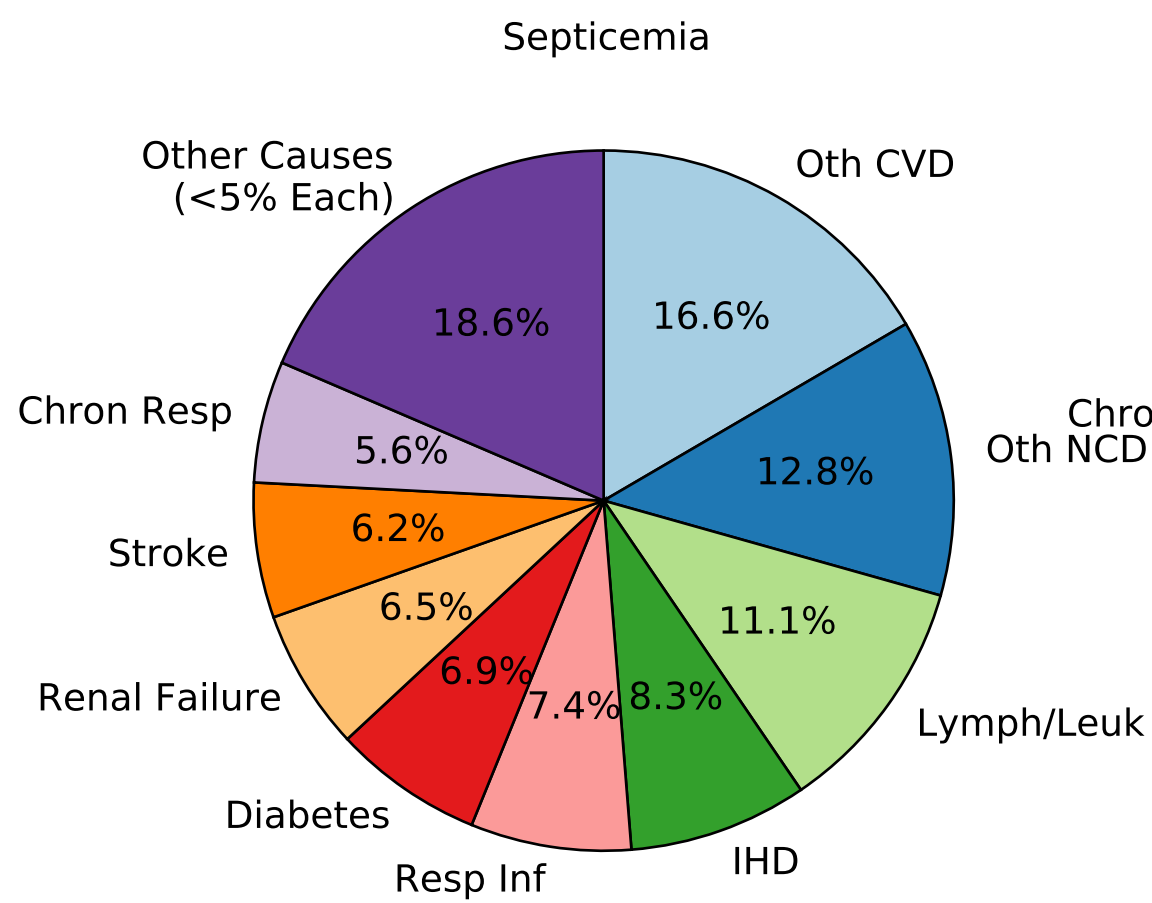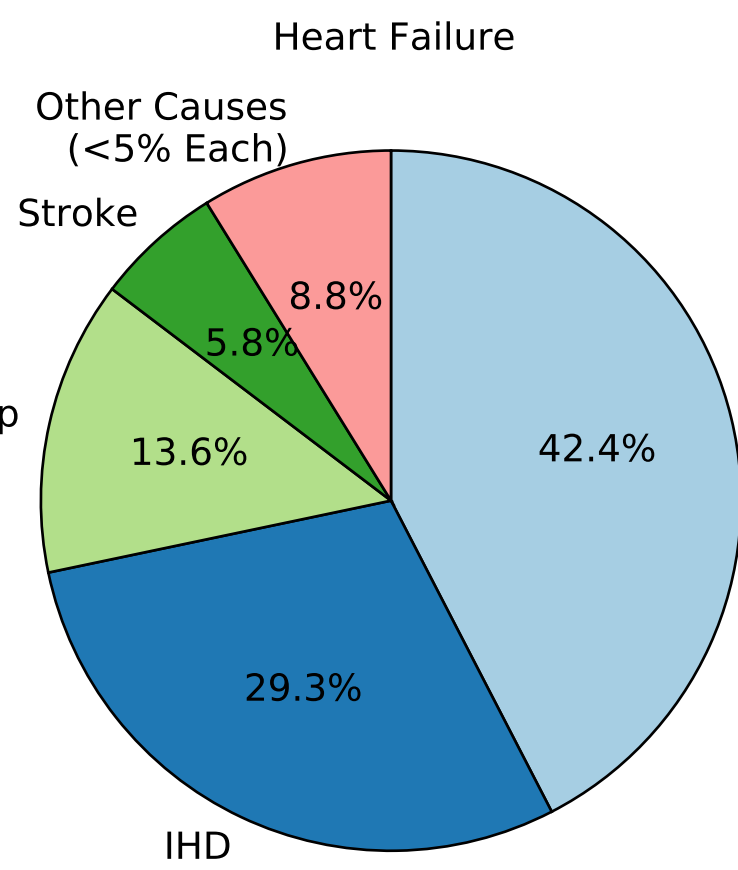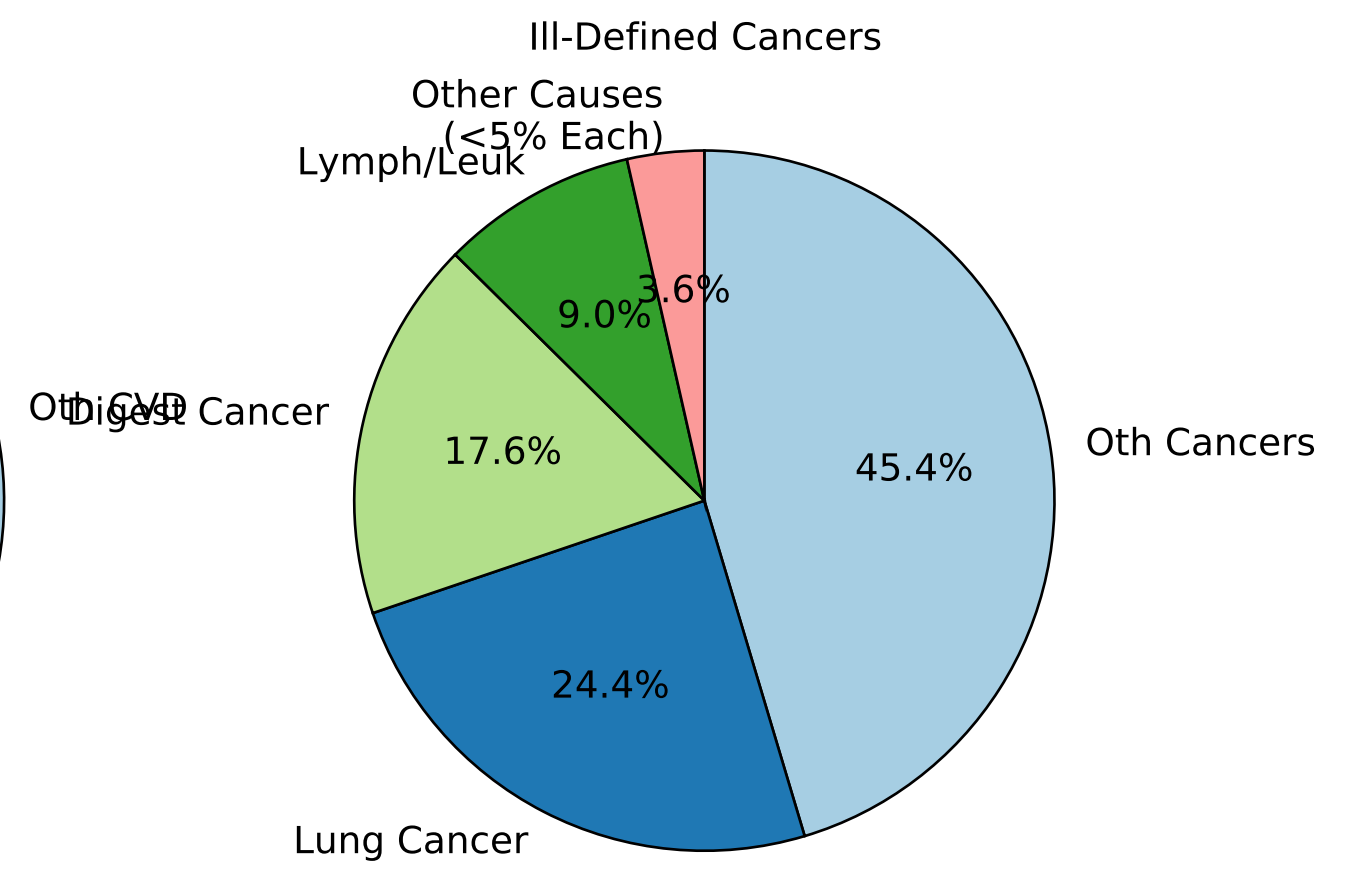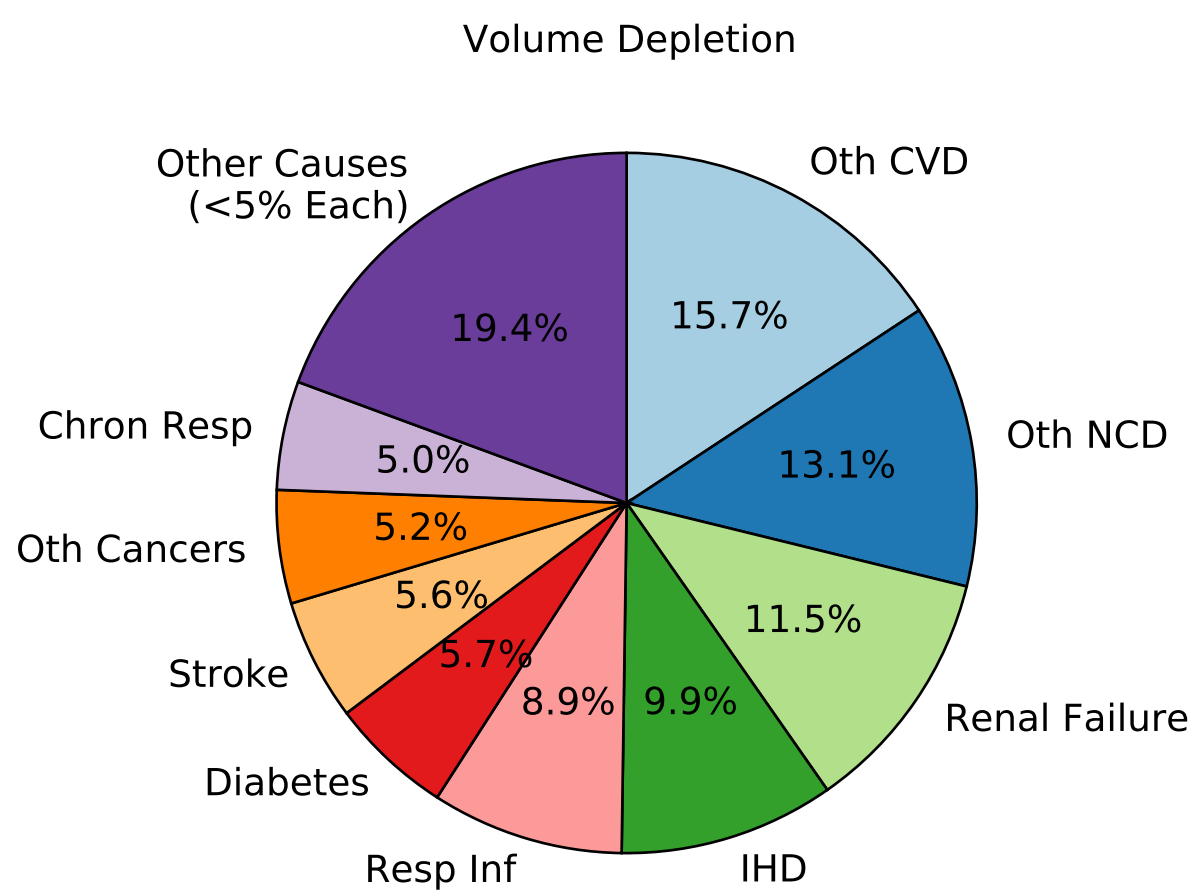

Ill-Defined

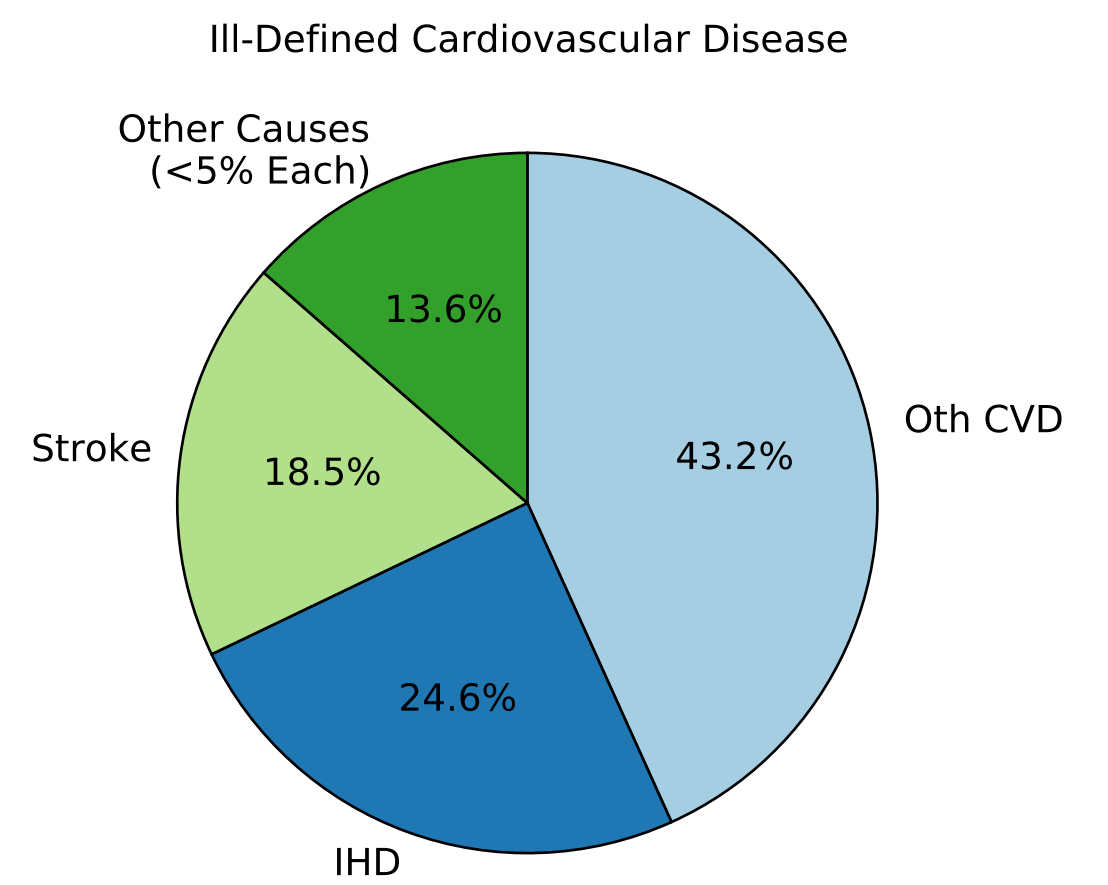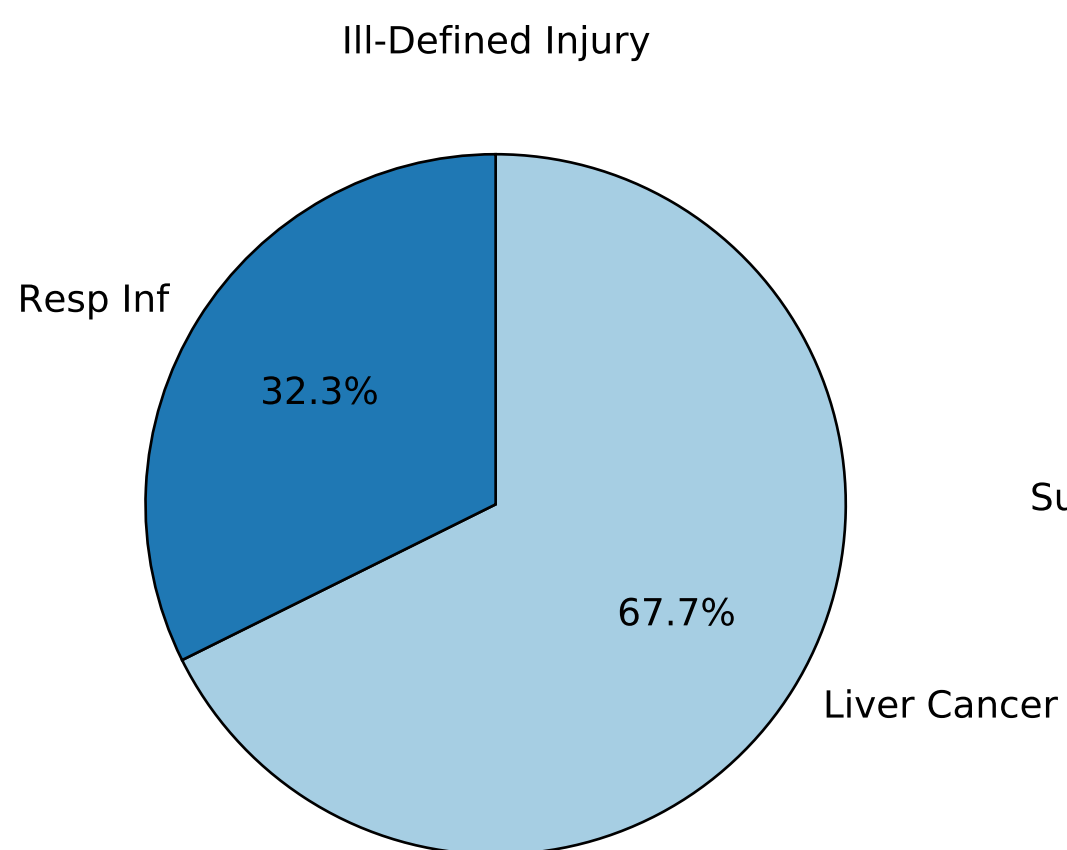

Injury of Undetermined Intent

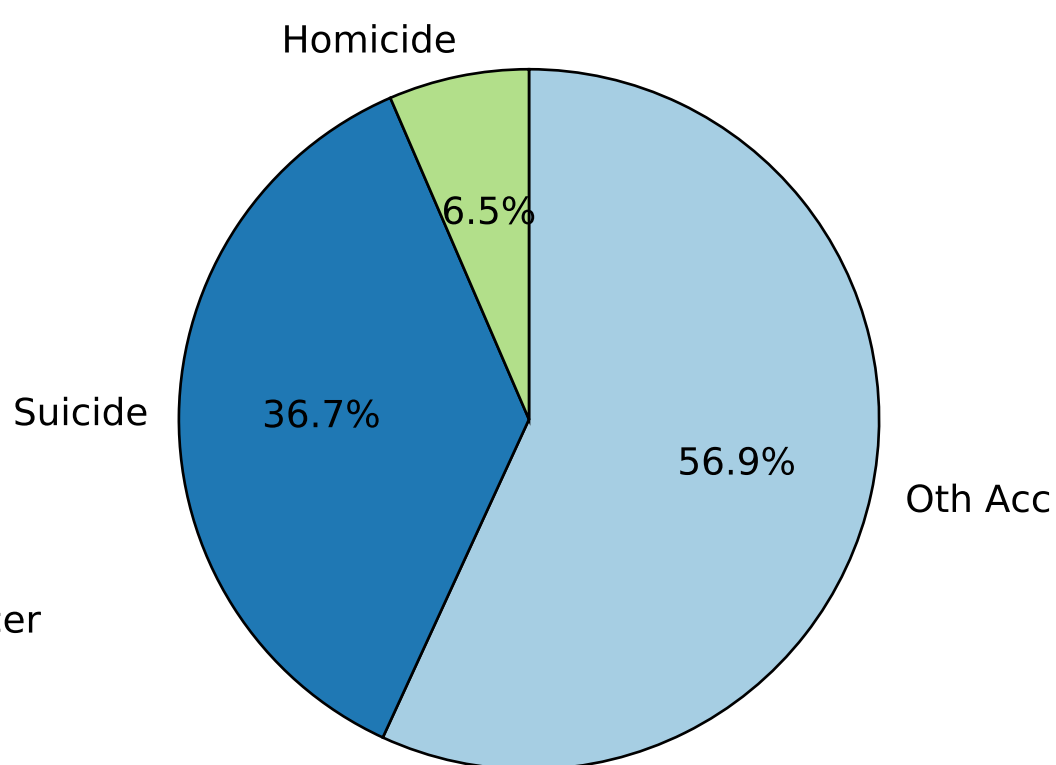

Ill-Defined Infectious Disease

ICD 9  
Male, Age 75

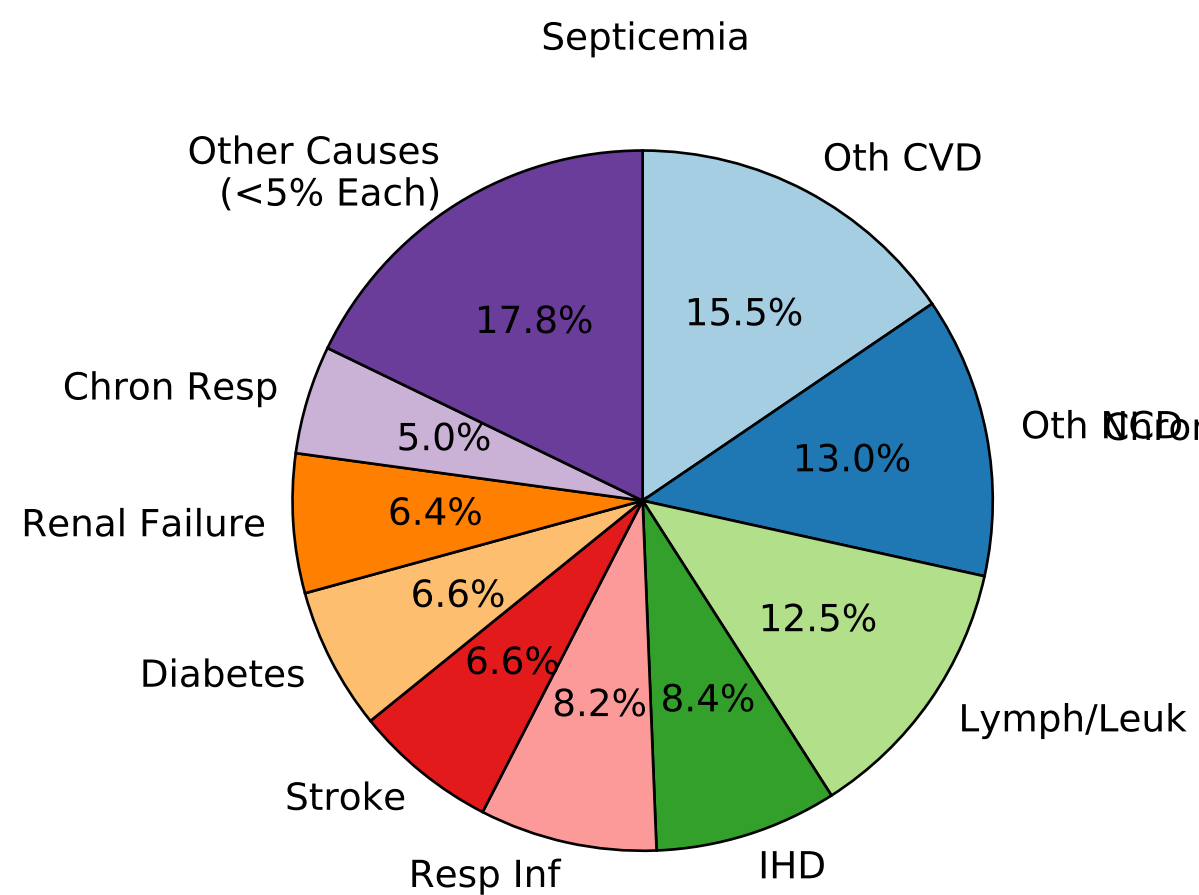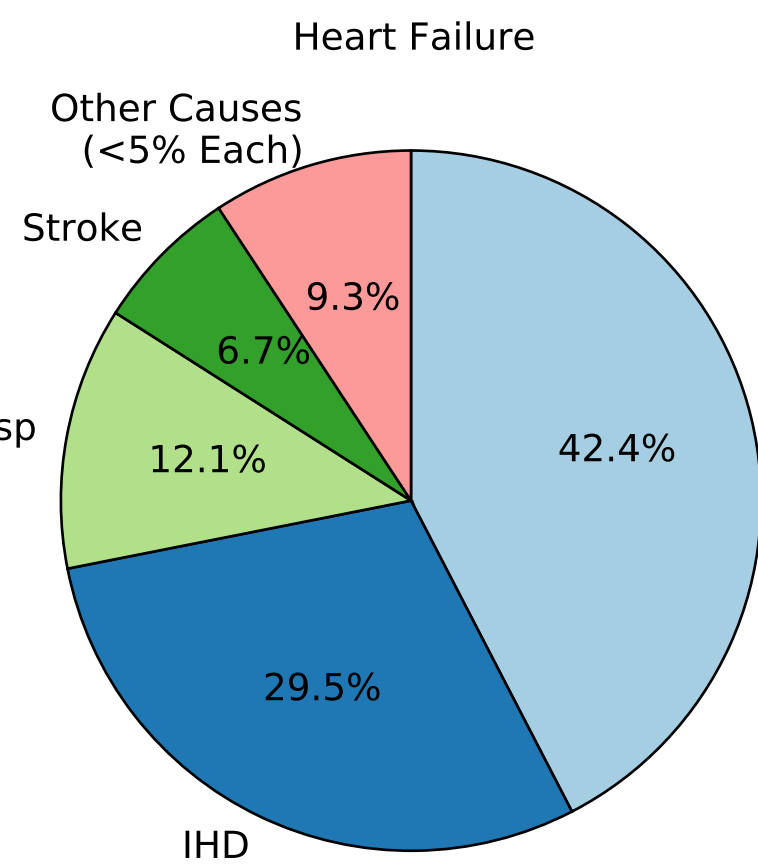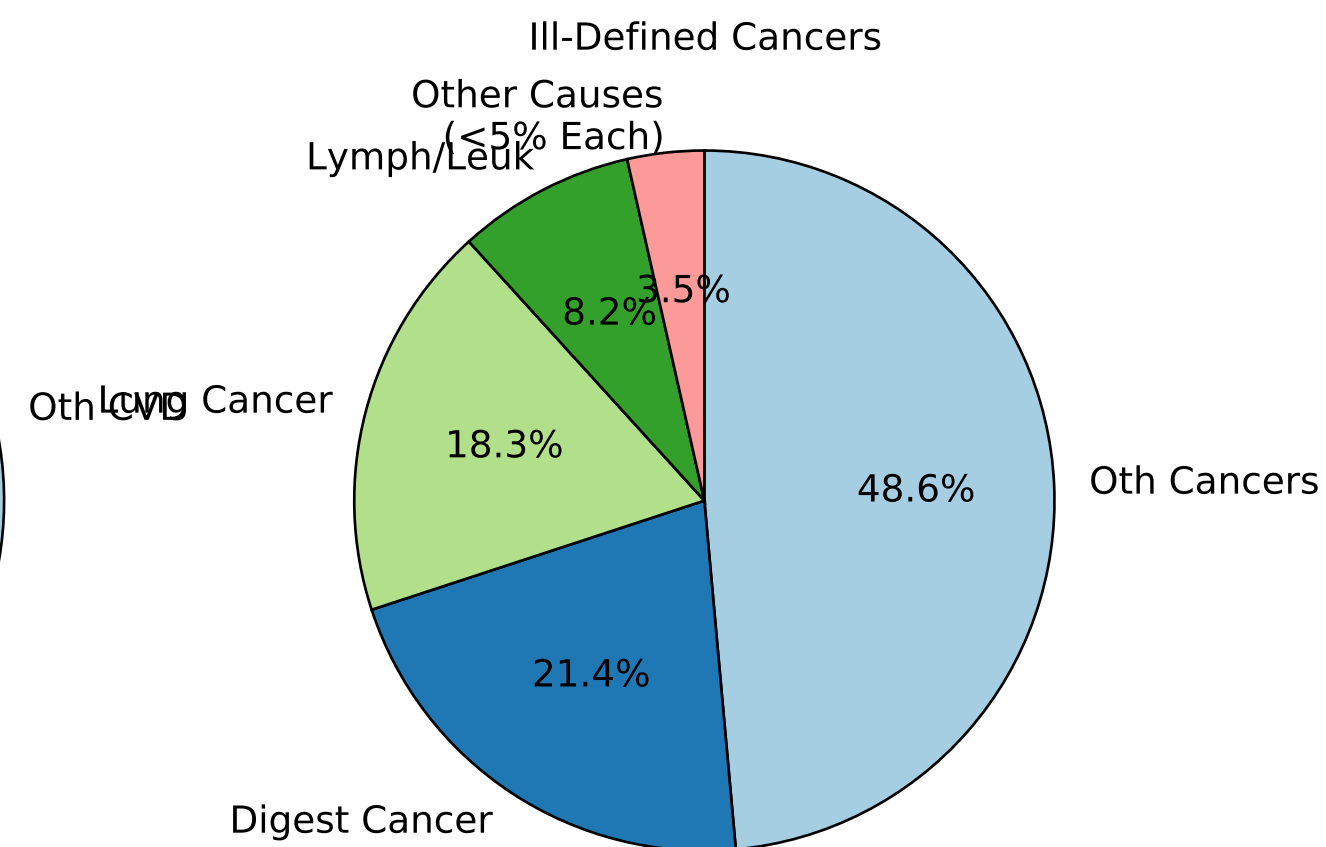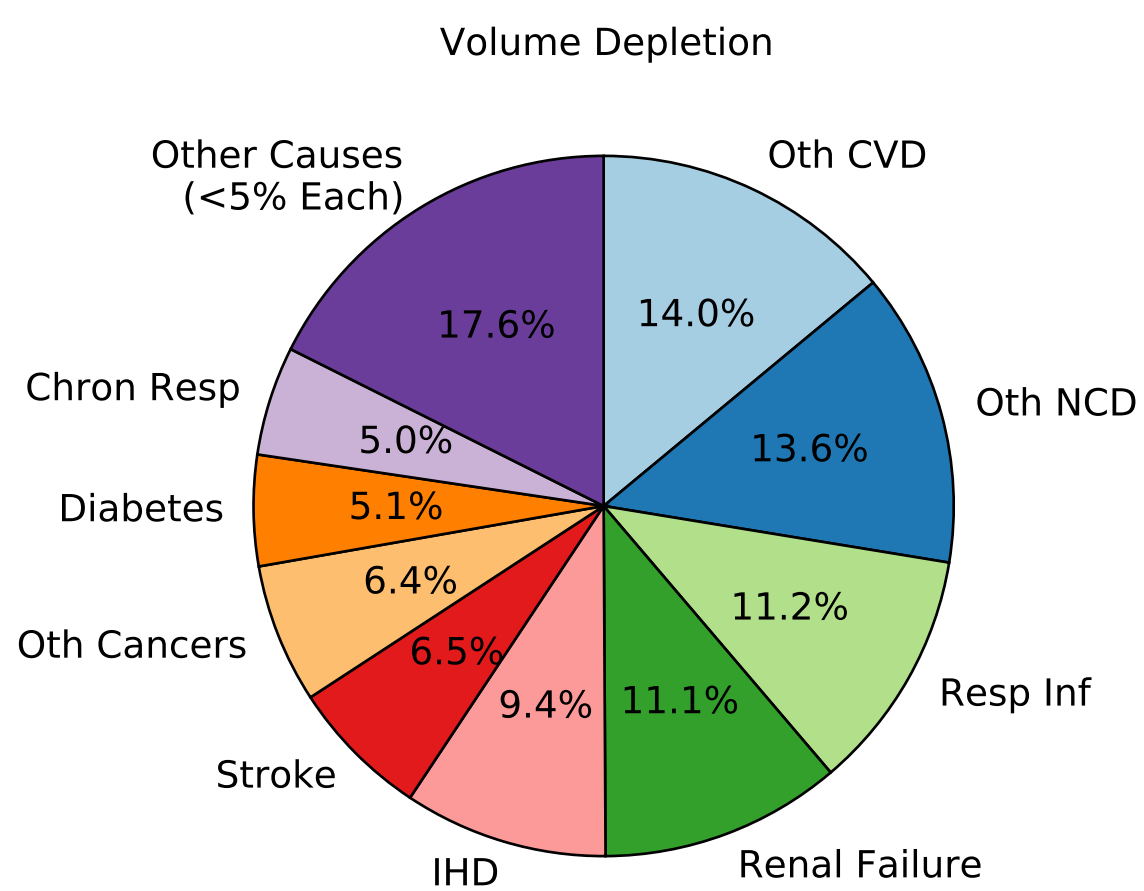

III-Defined

III-Defined Cardiovascular Disease

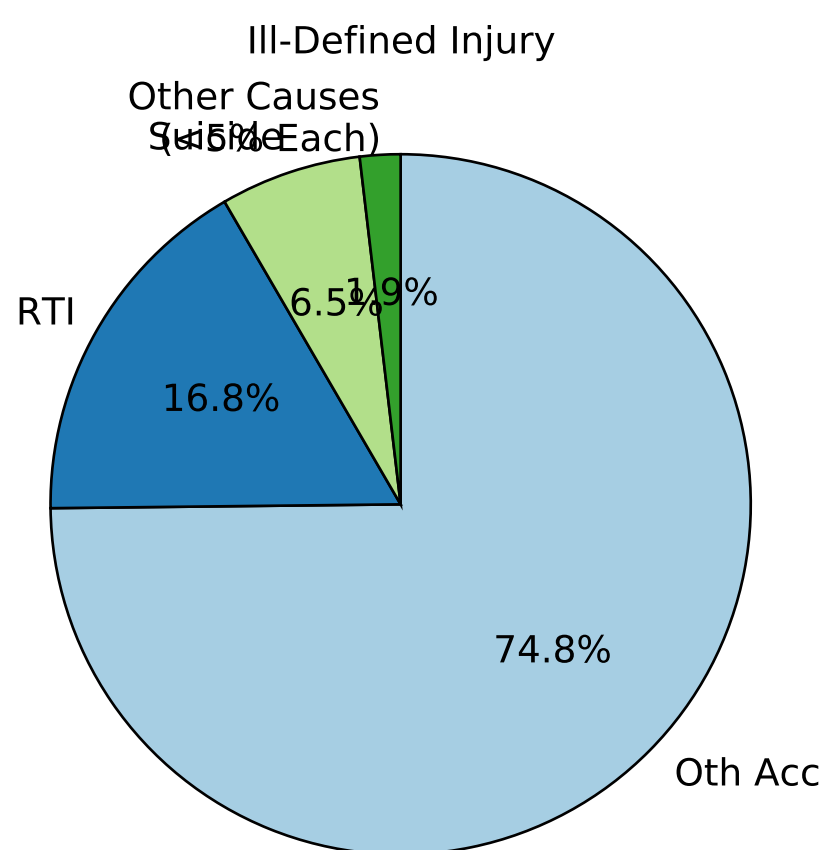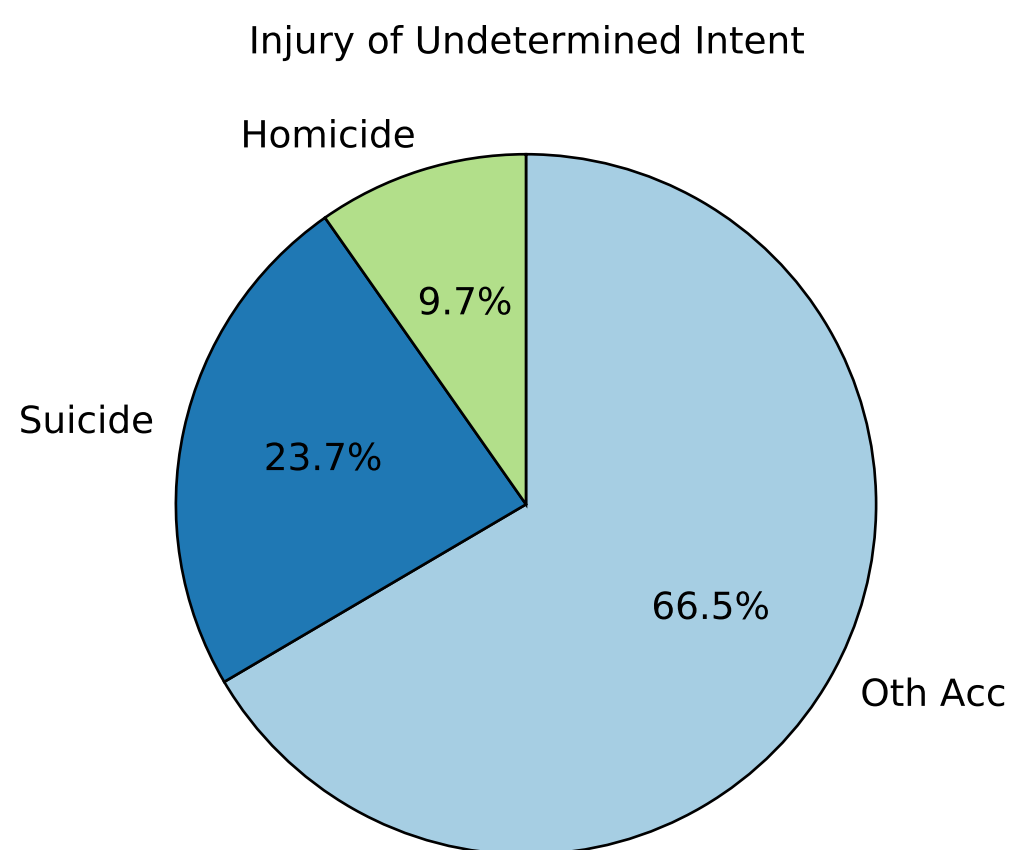

III-Defined Infectious Disease

ICD 9  
Male, Age 80

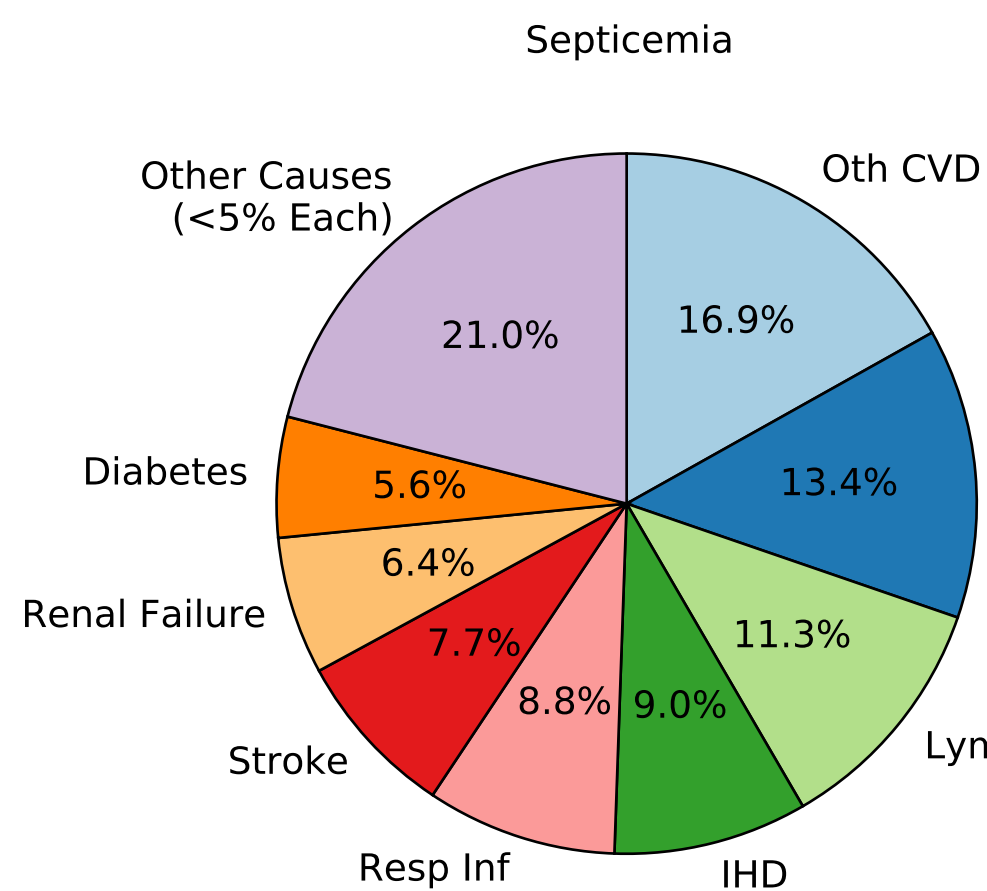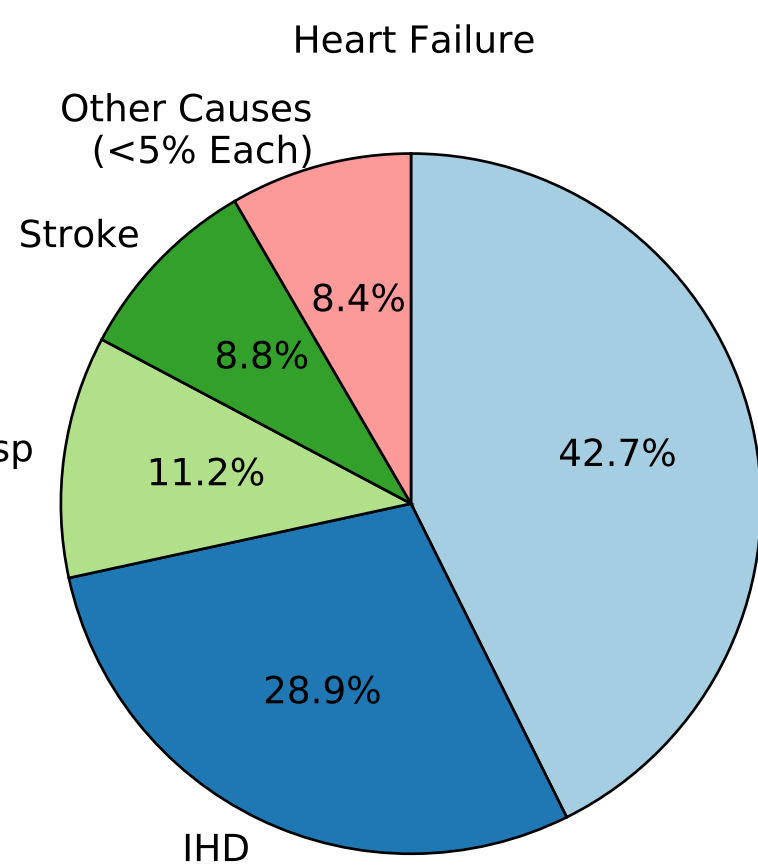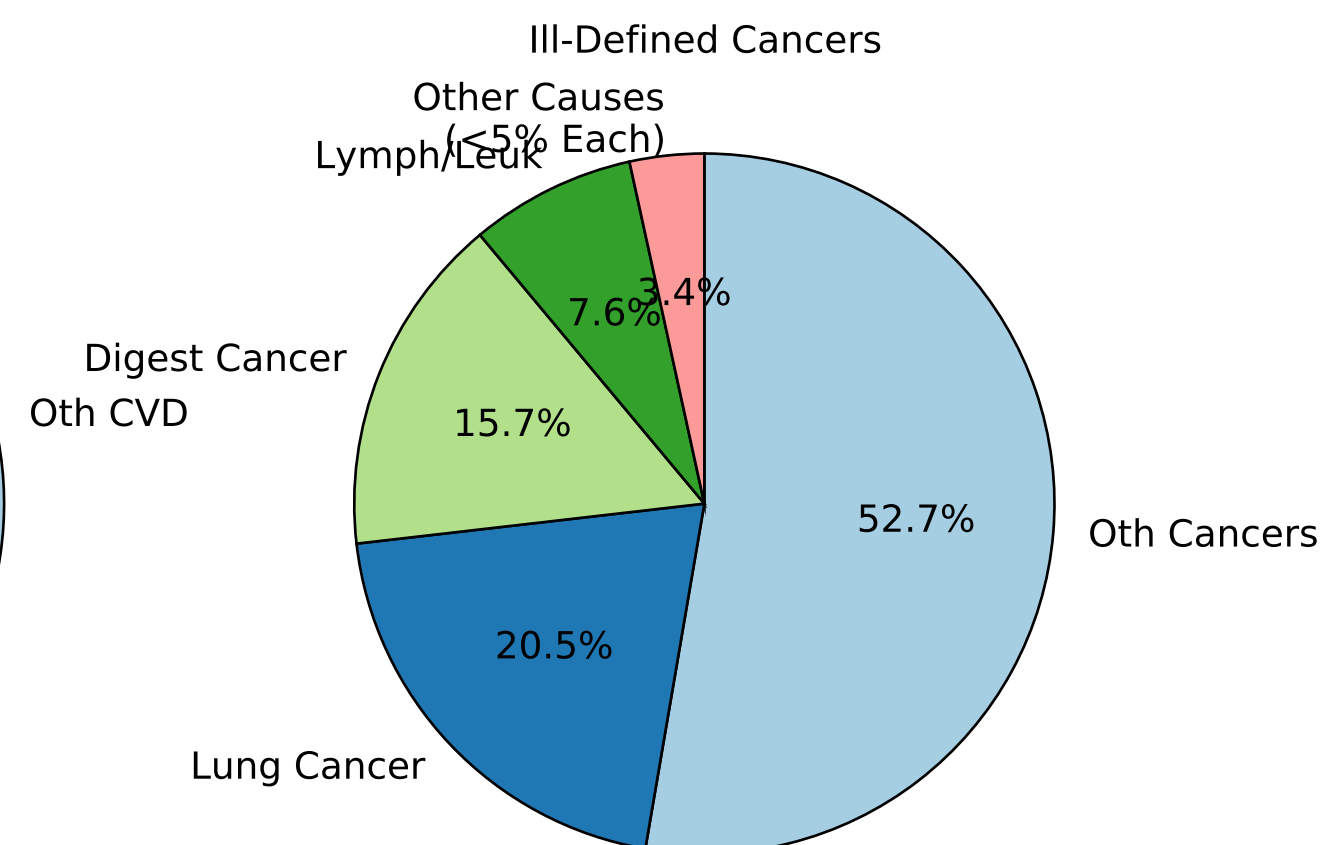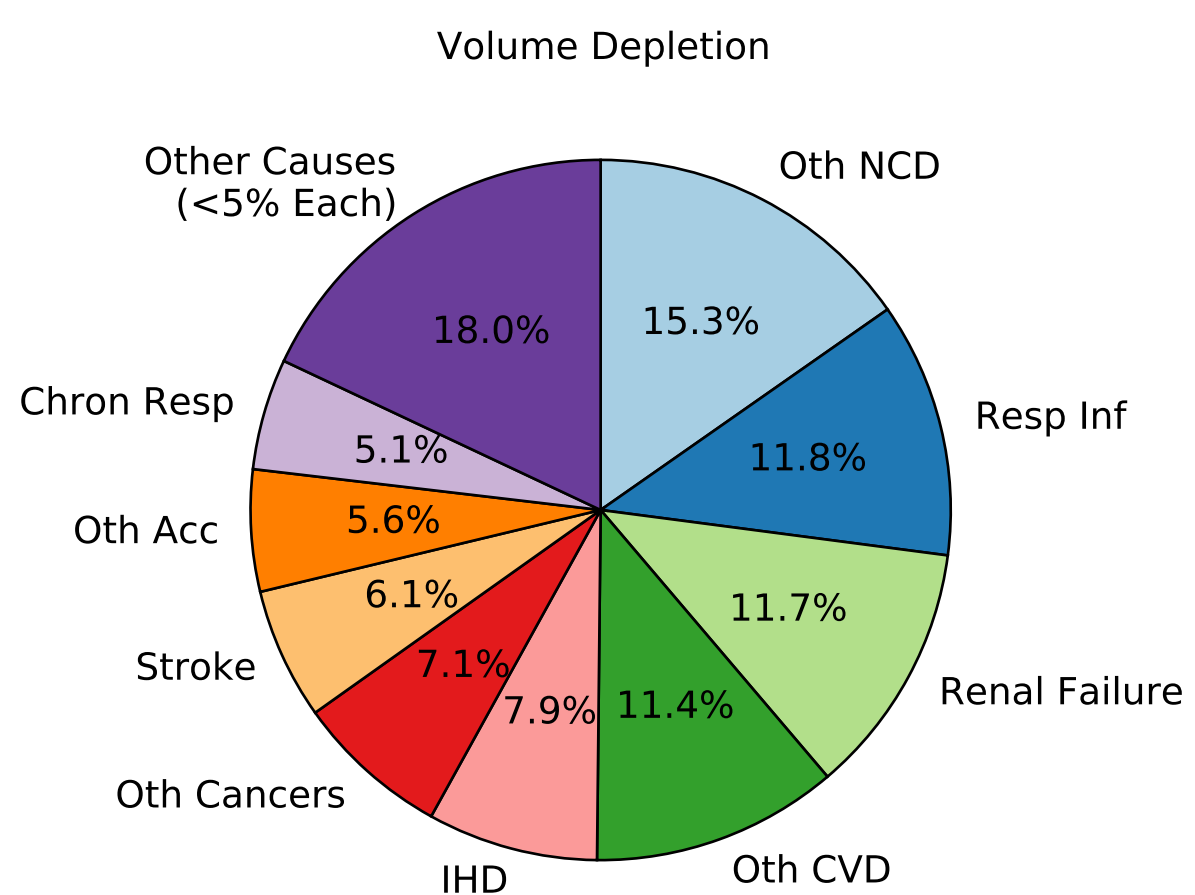

Ill-Defined

Ill-Defined Cardiovascular Disease

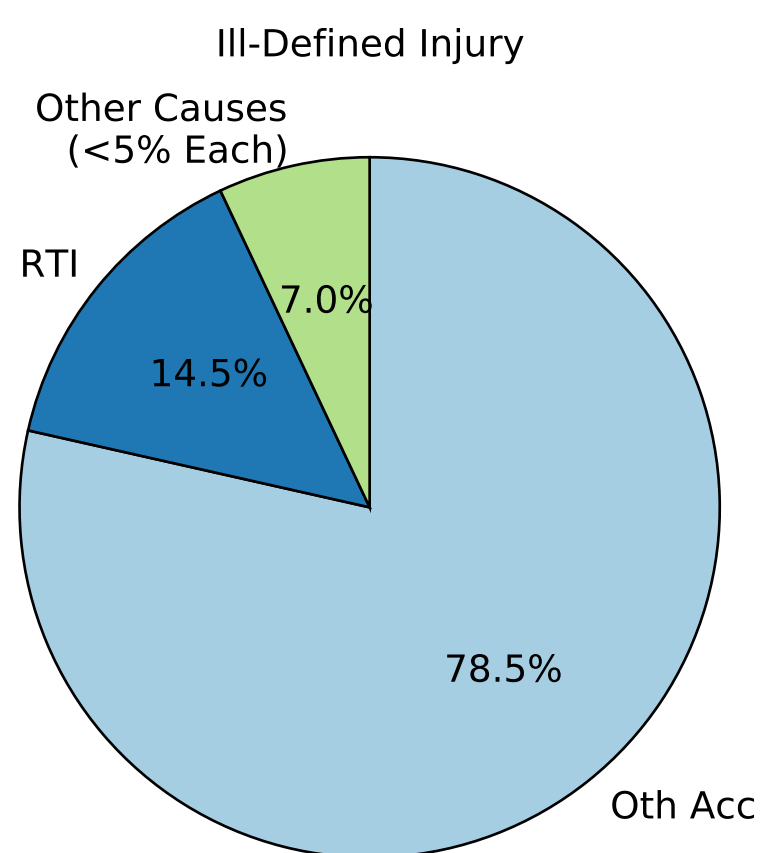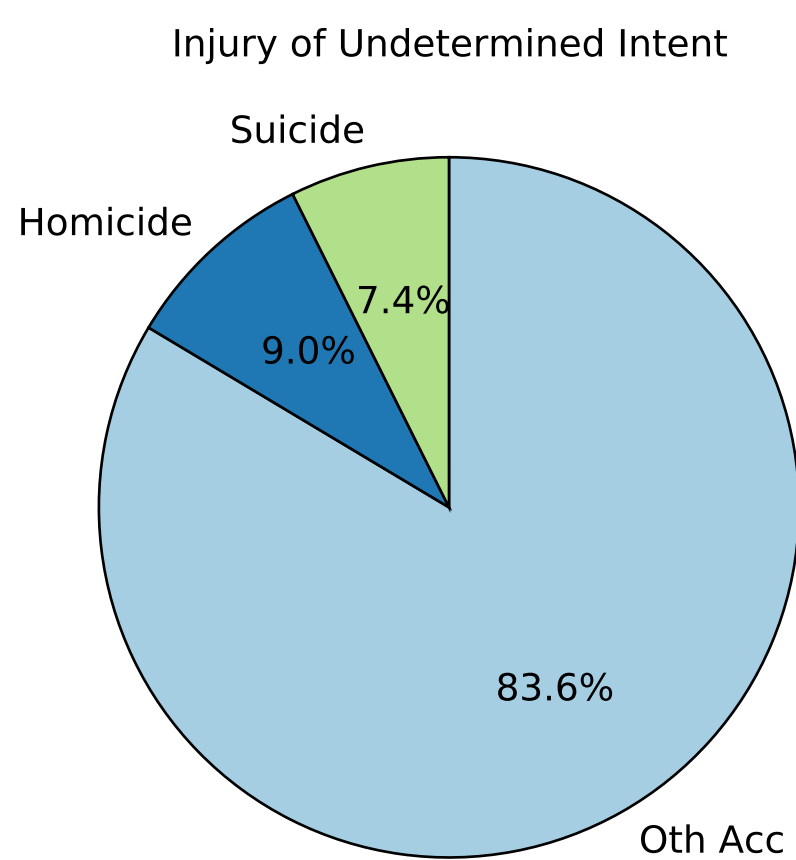

Ill-Defined Infectious Disease

ICD 9  
Male, Age 85

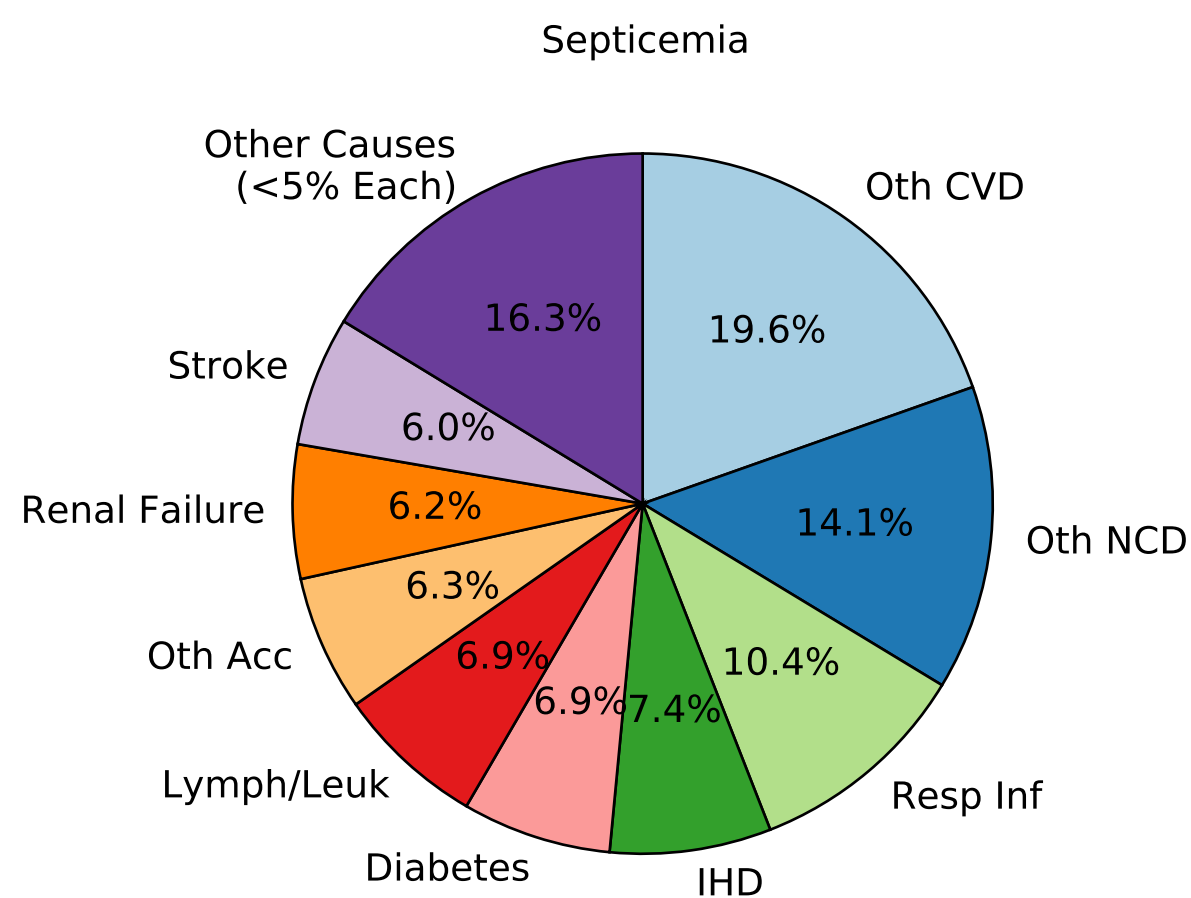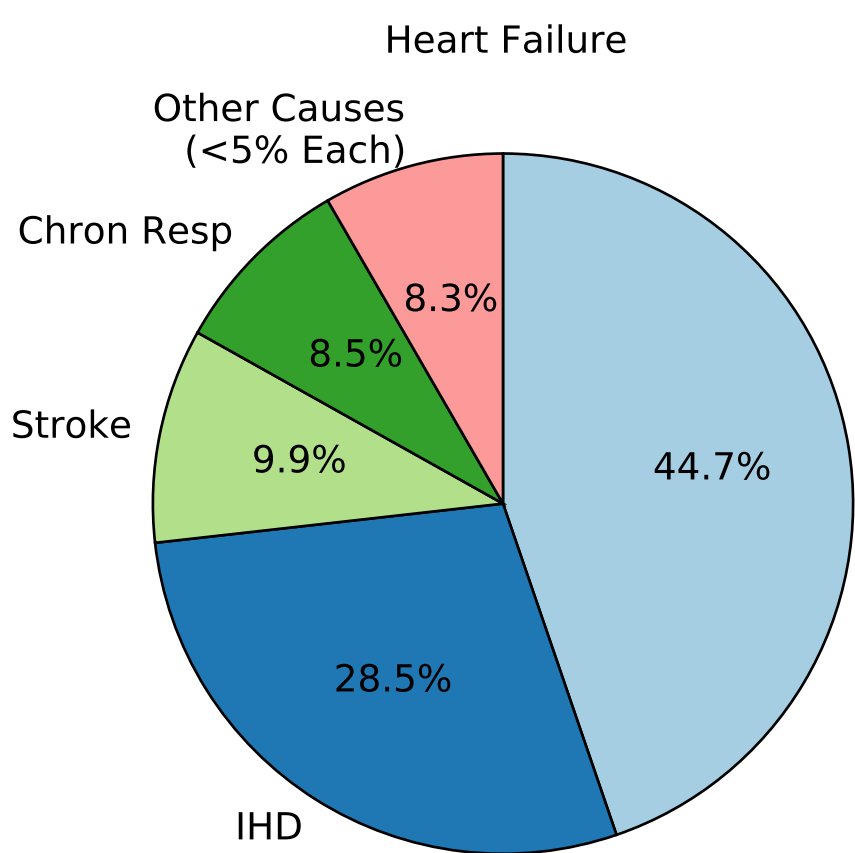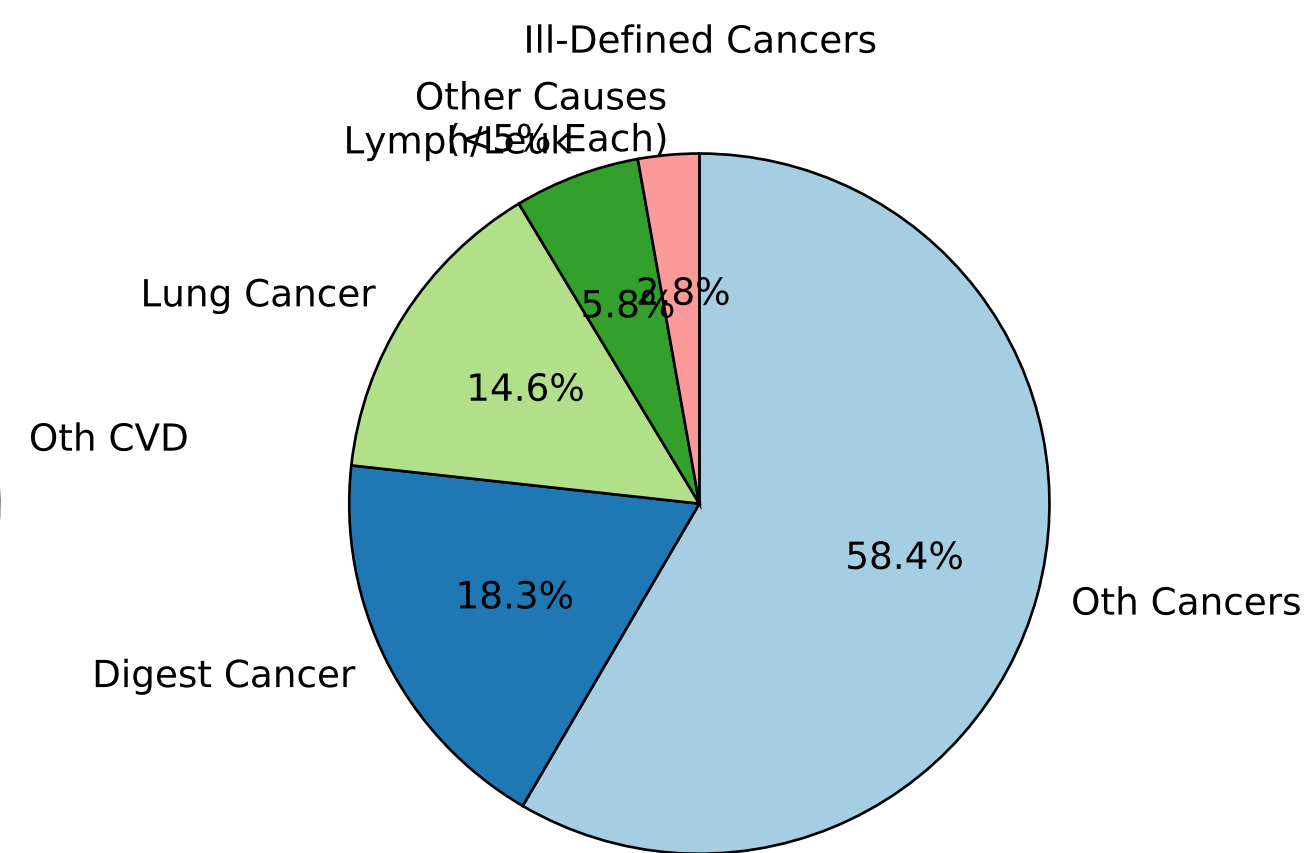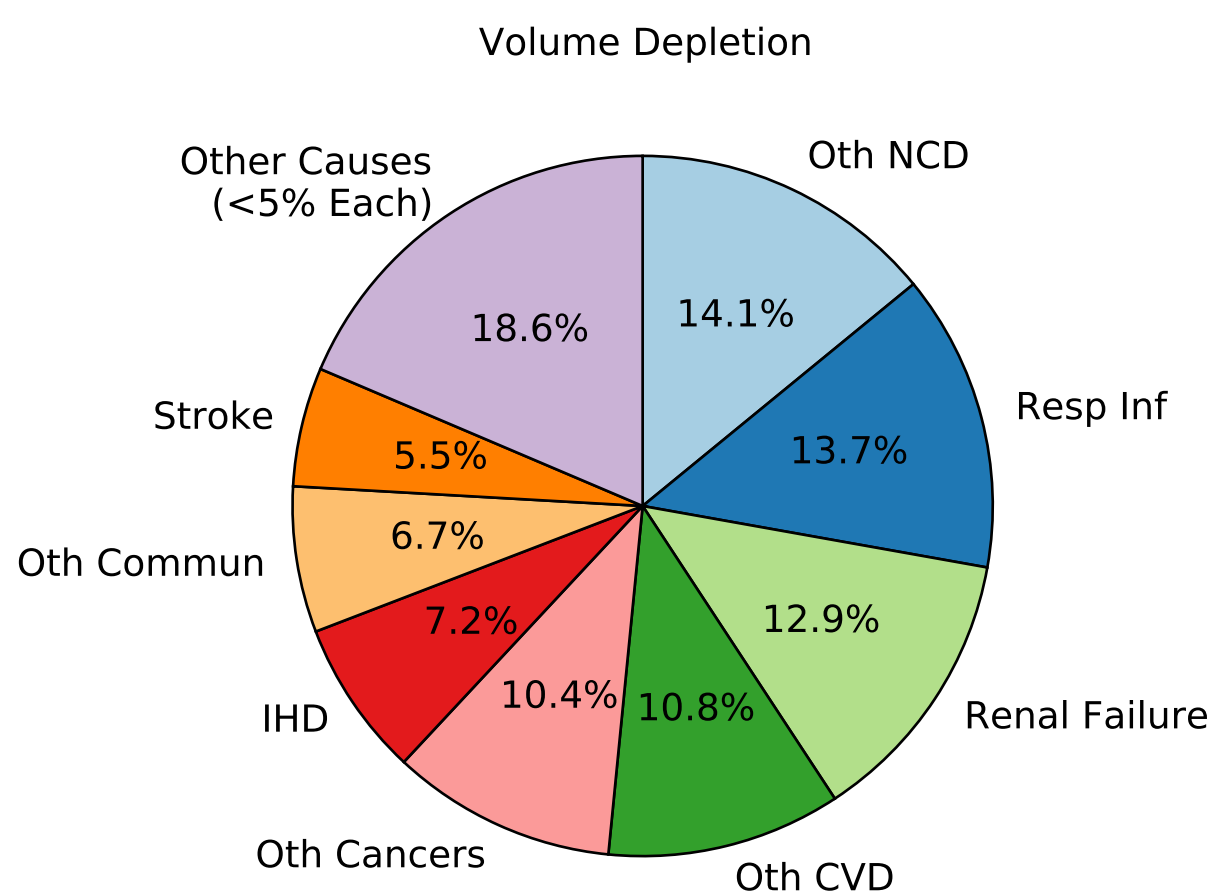

Ill-Defined

Ill-Defined Cardiovascular Disease

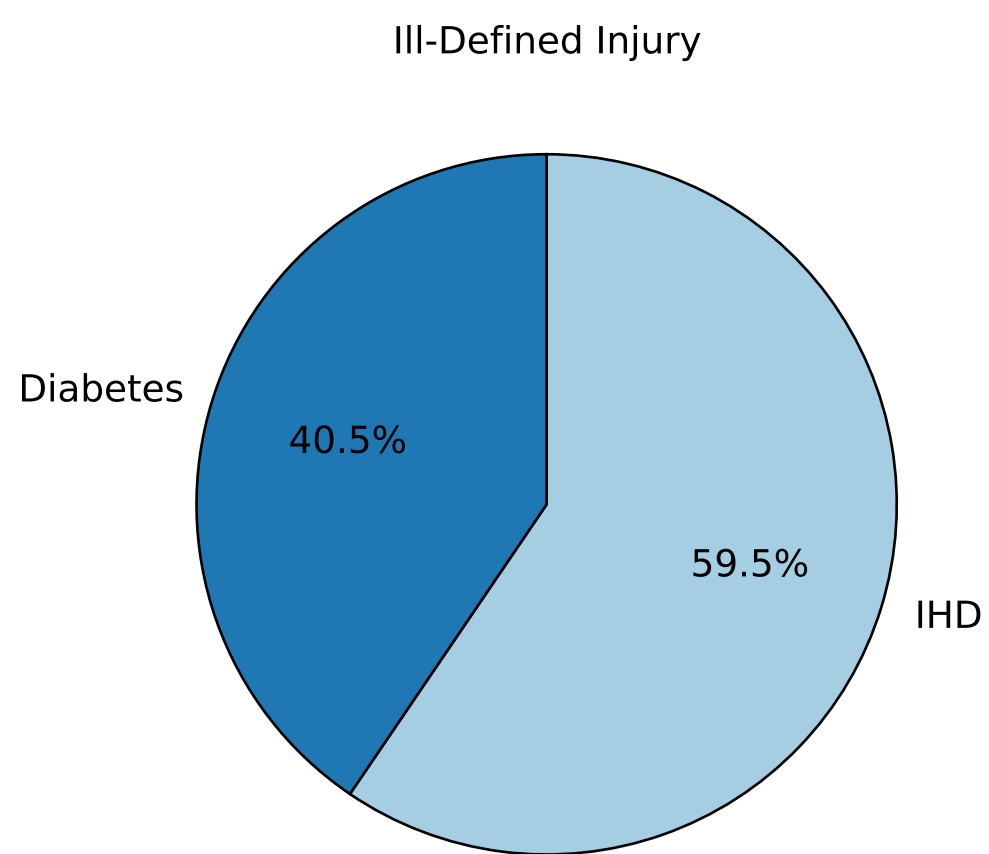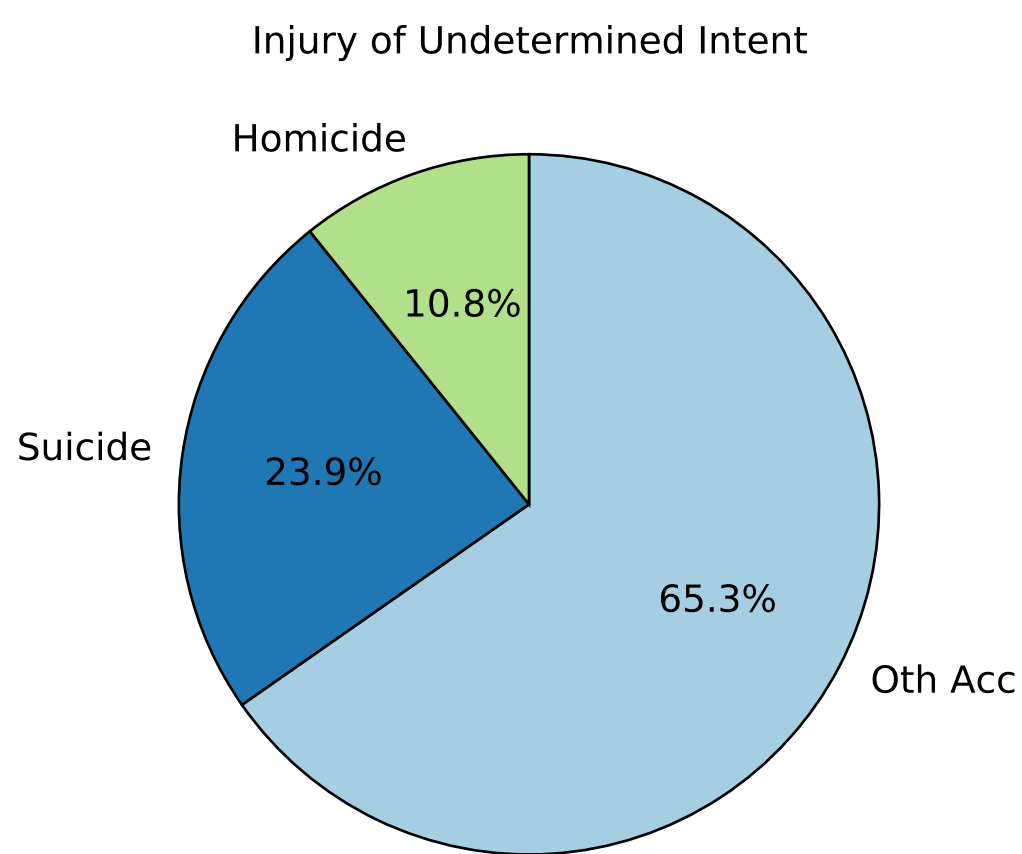

Ill-Defined Infectious Disease

ICD 10  
Female, Age 0

Septicemia

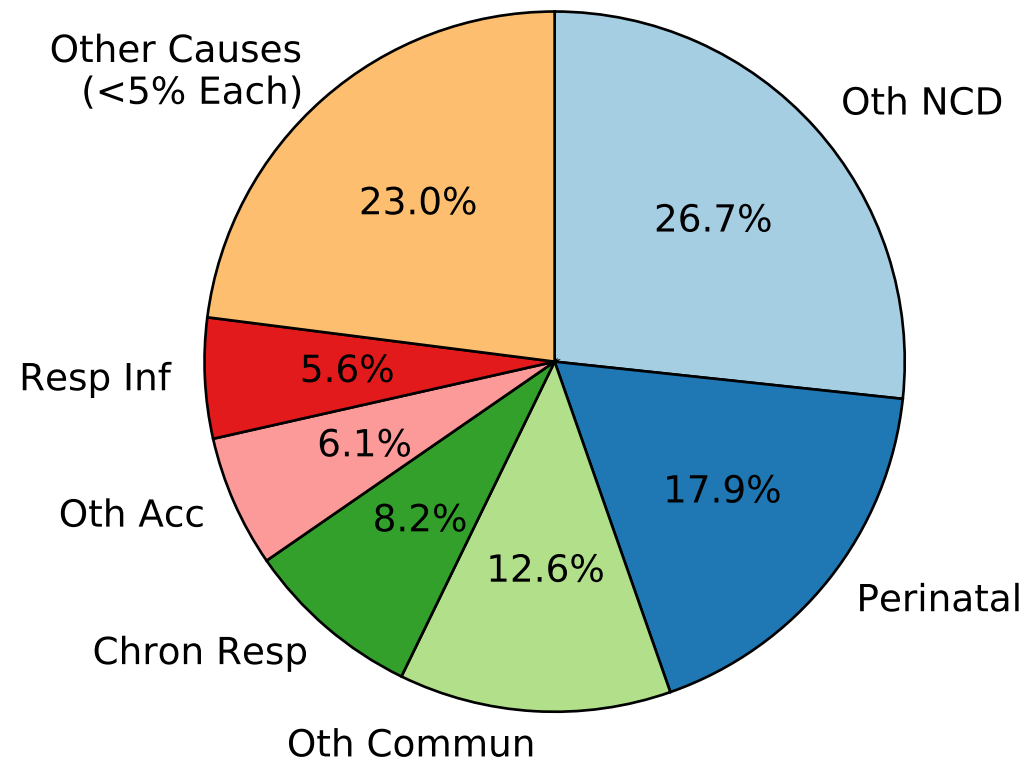

Heart Failure

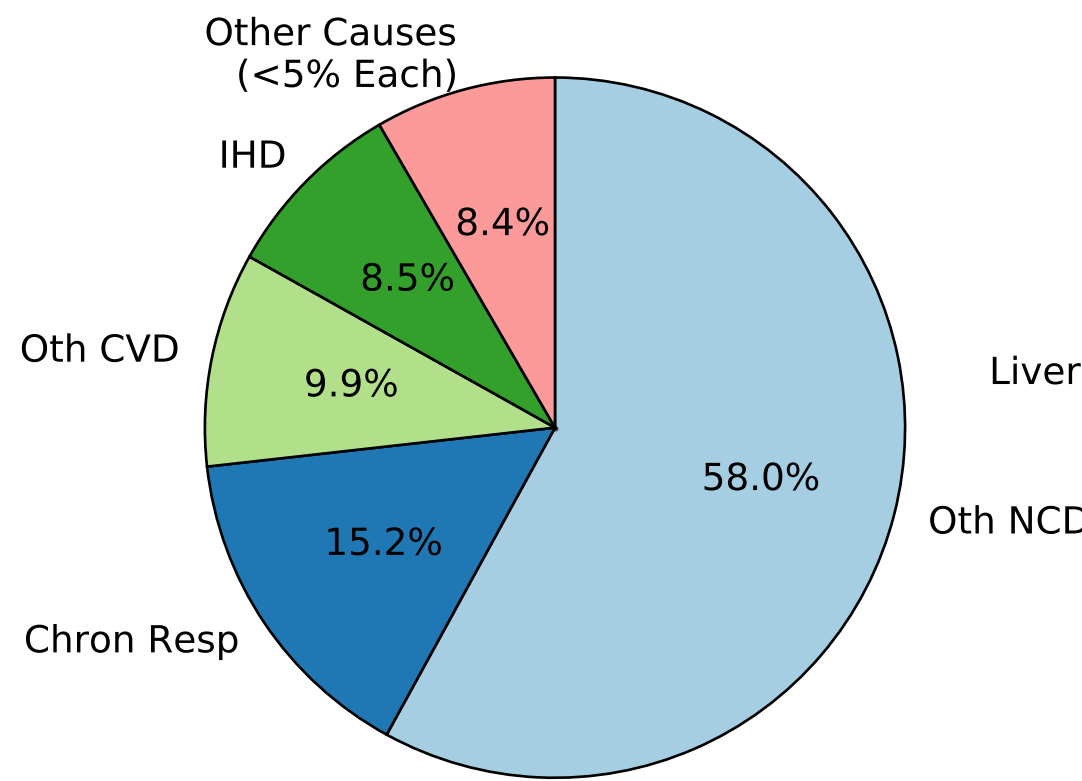

Ill-Defined Cancers

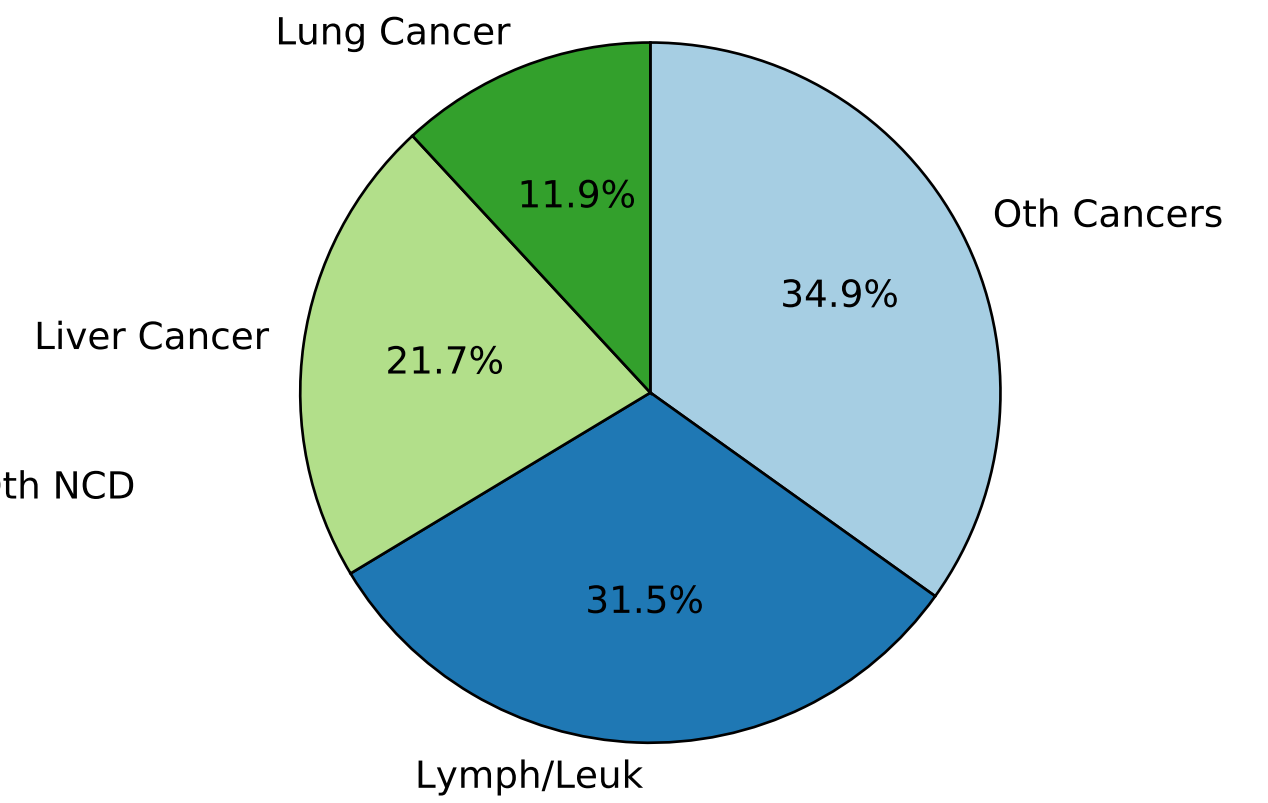

Volume Depletion

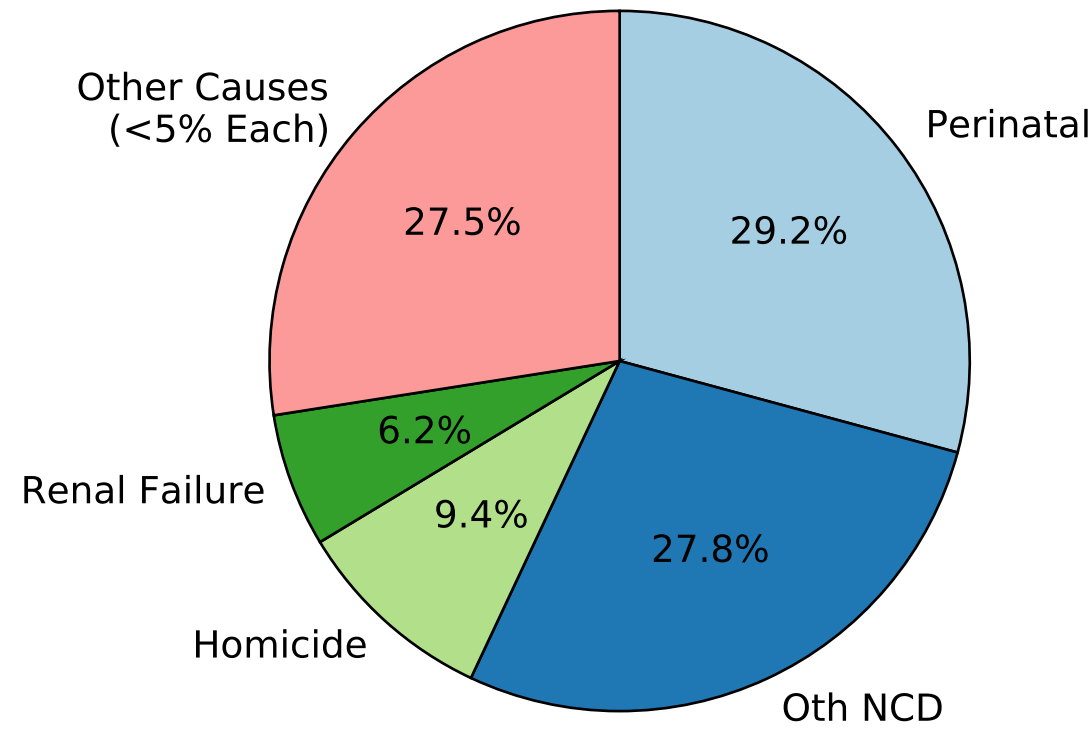

Ill-Defined

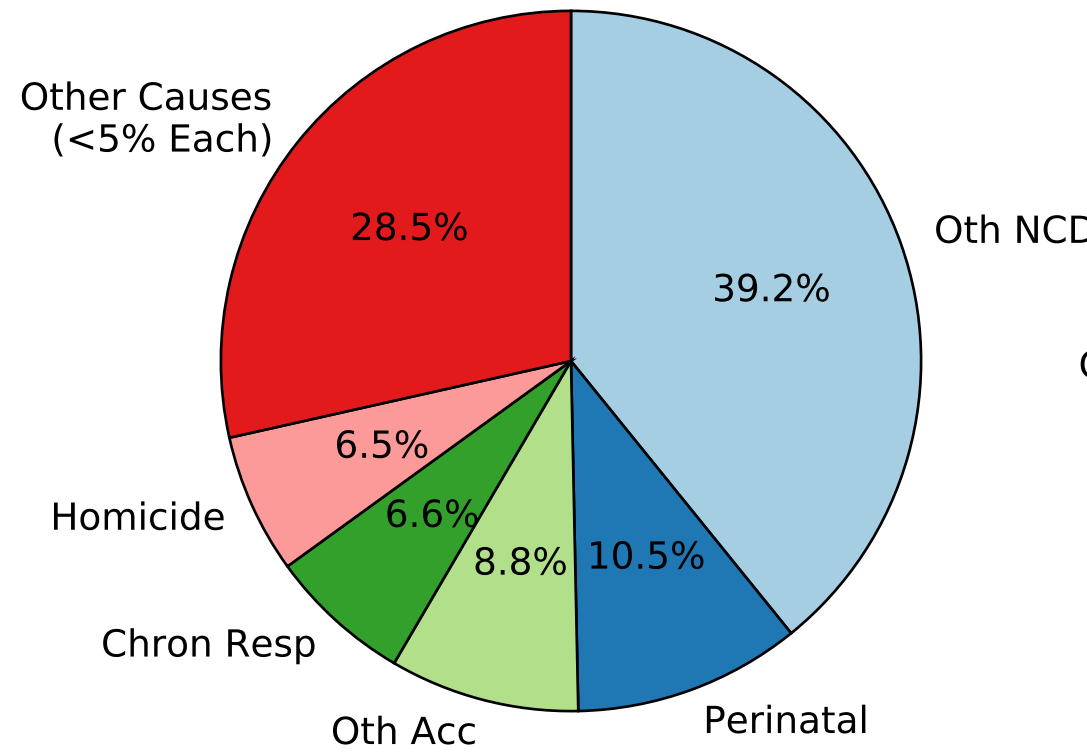

Ill-Defined Cardiovascular Disease

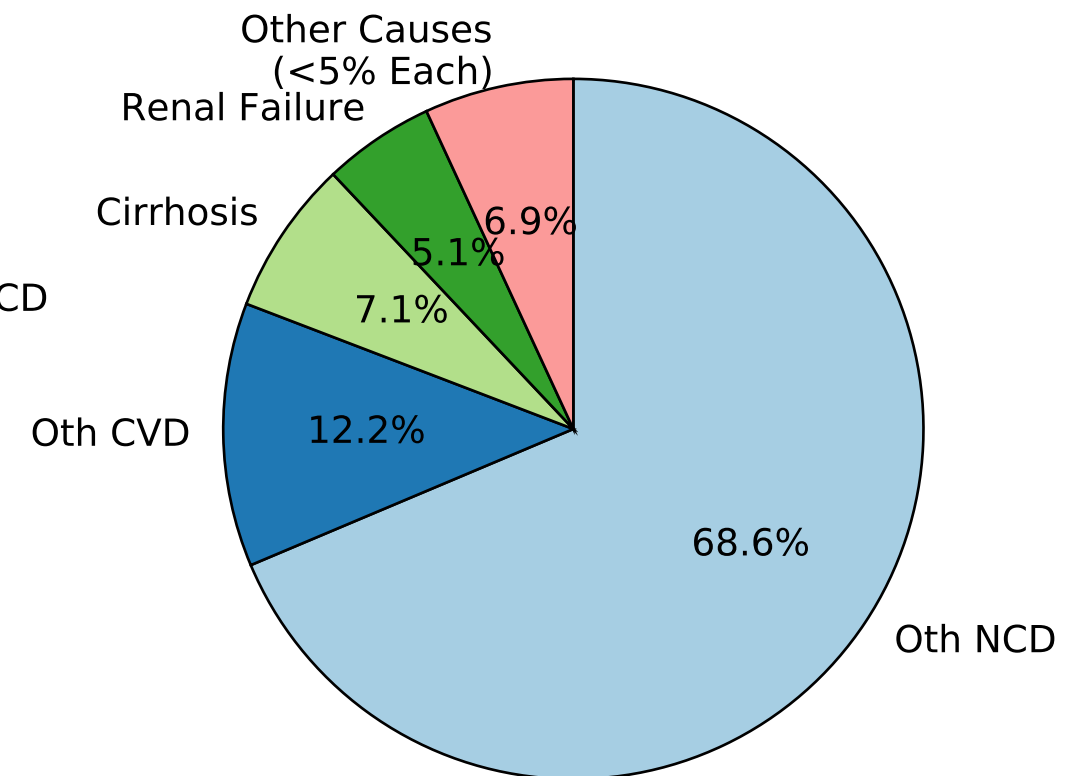

Ill-Defined Injury

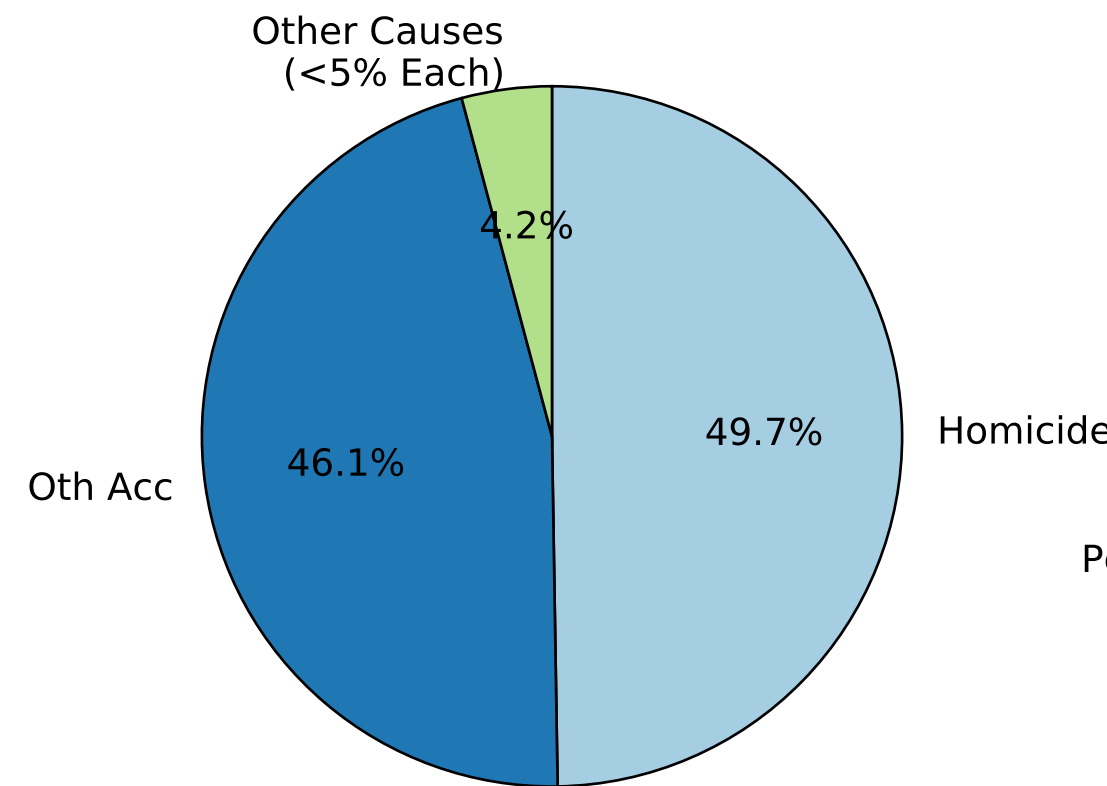

Injury of Undetermined Intent

Ill-Defined Infectious Disease

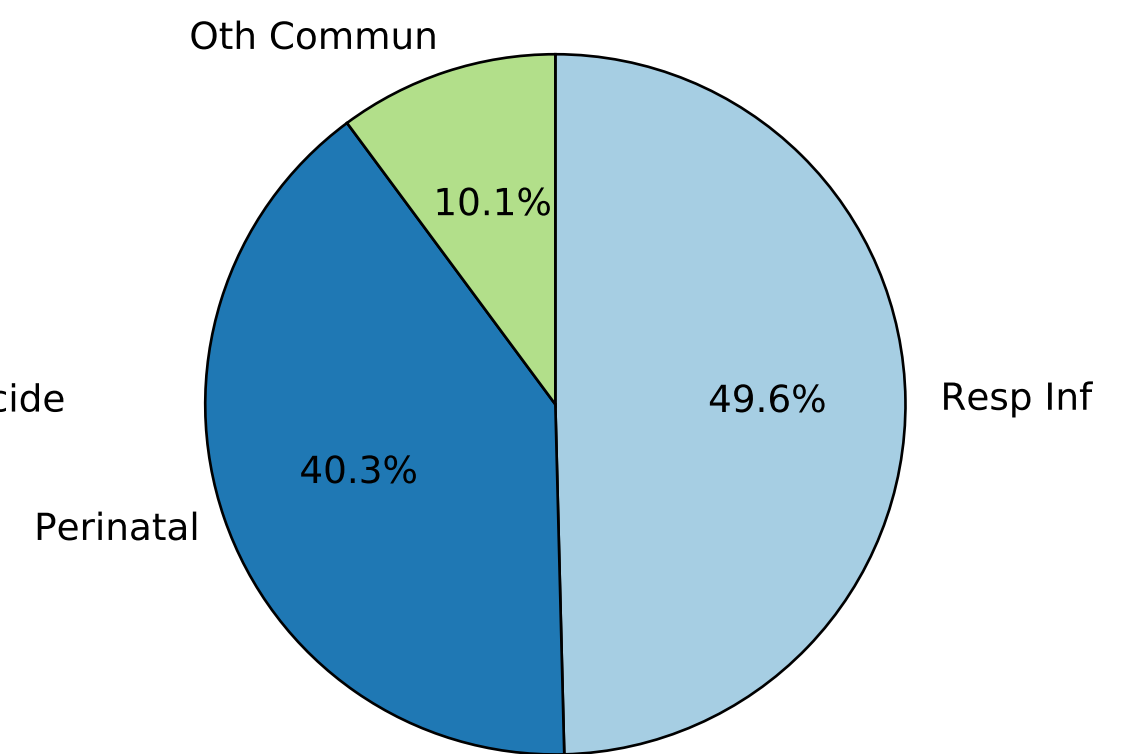

ICD 10  
Female, Age 5

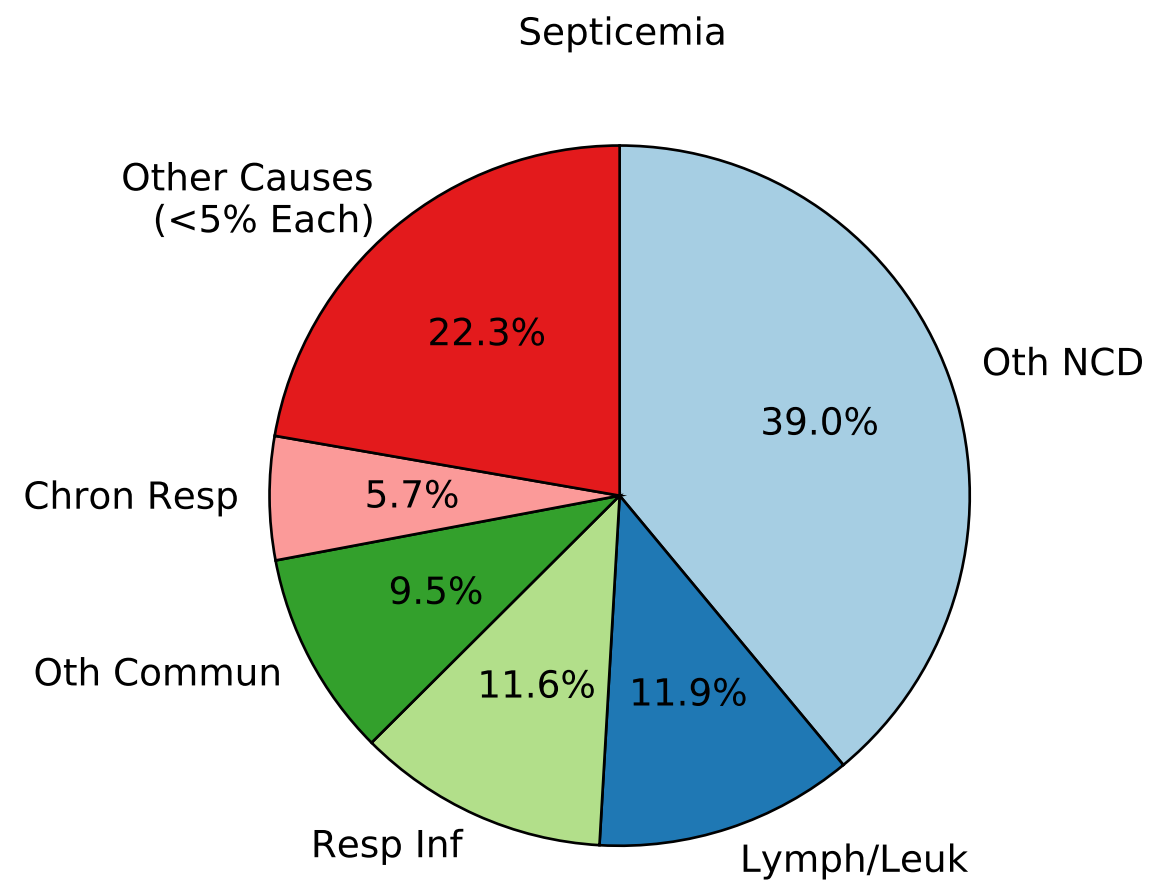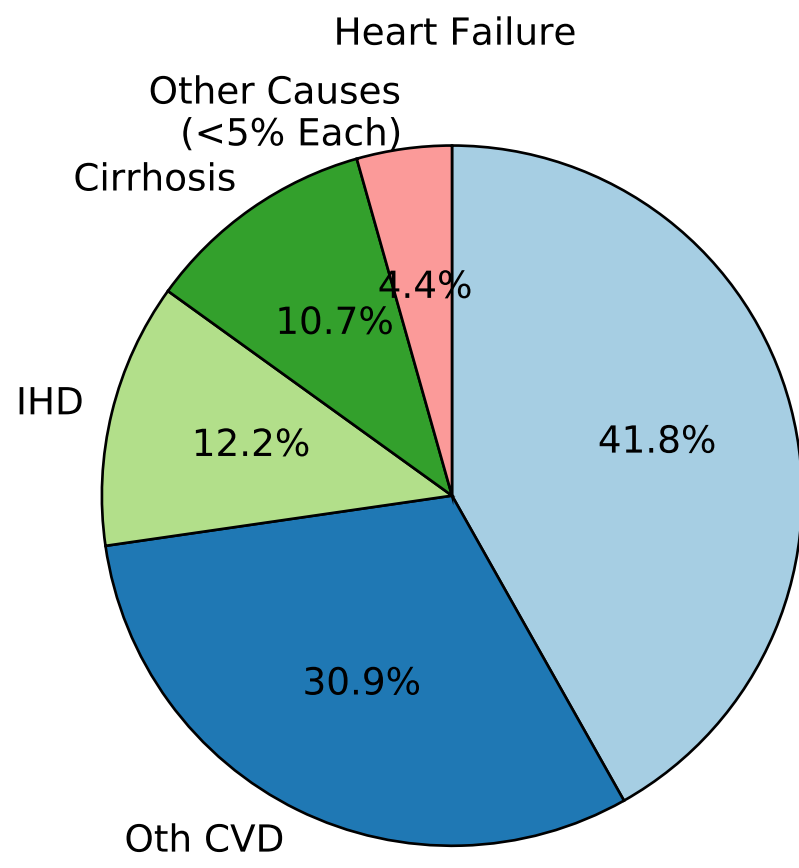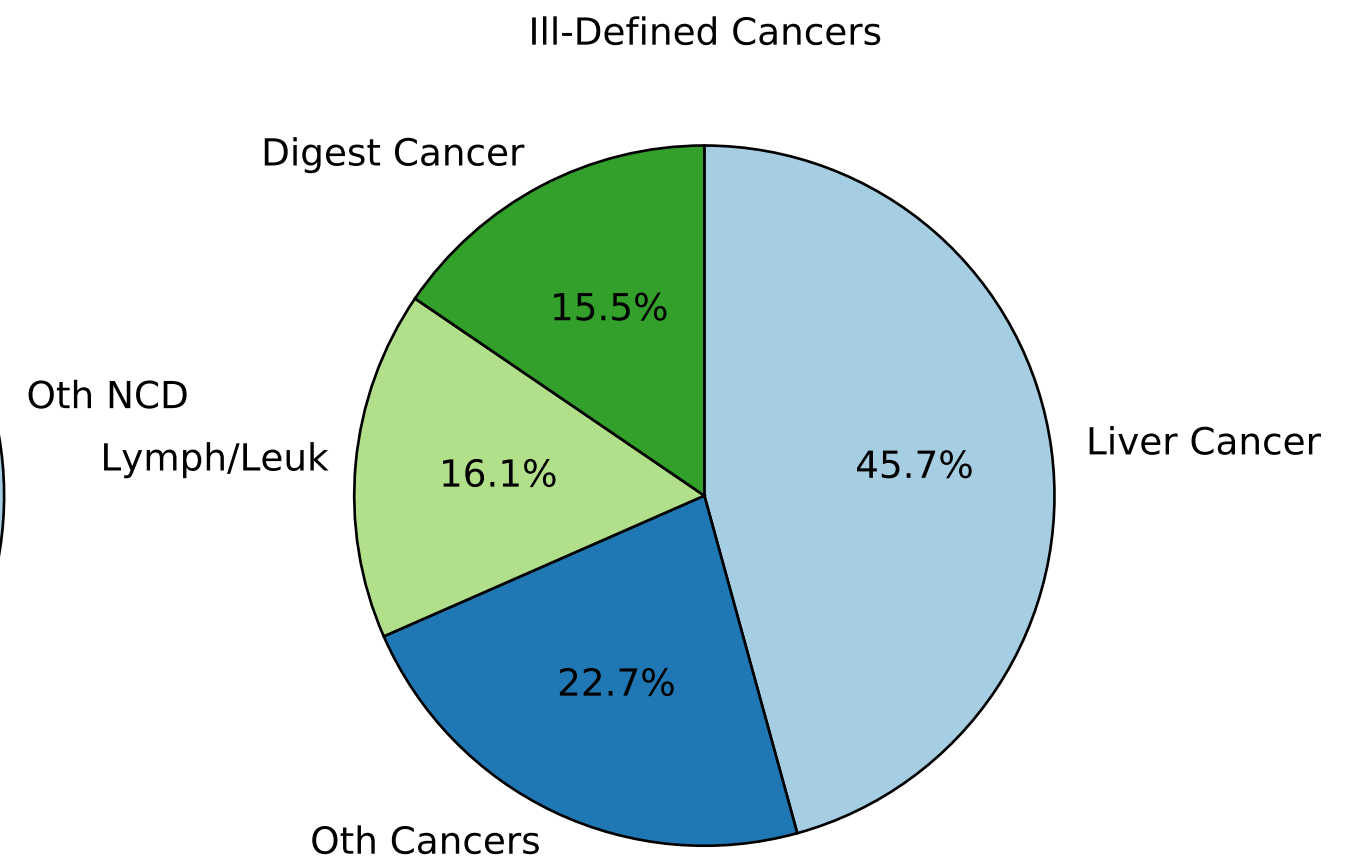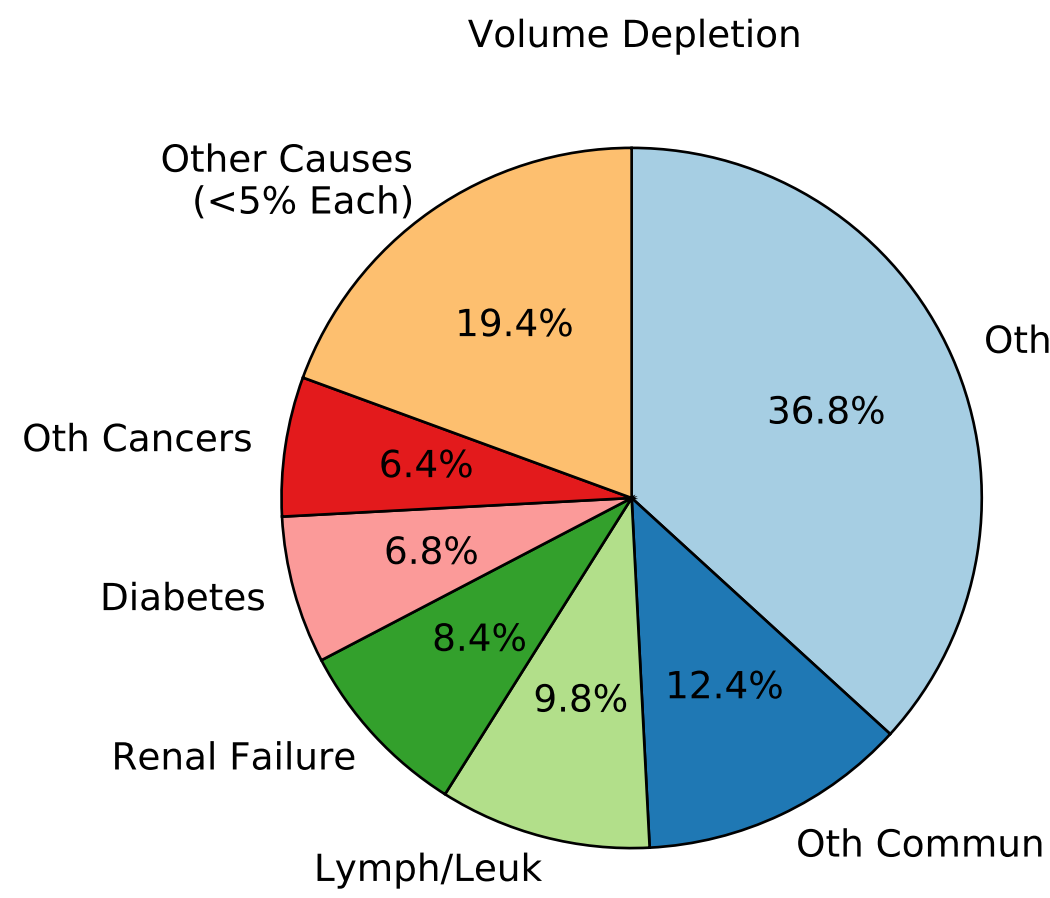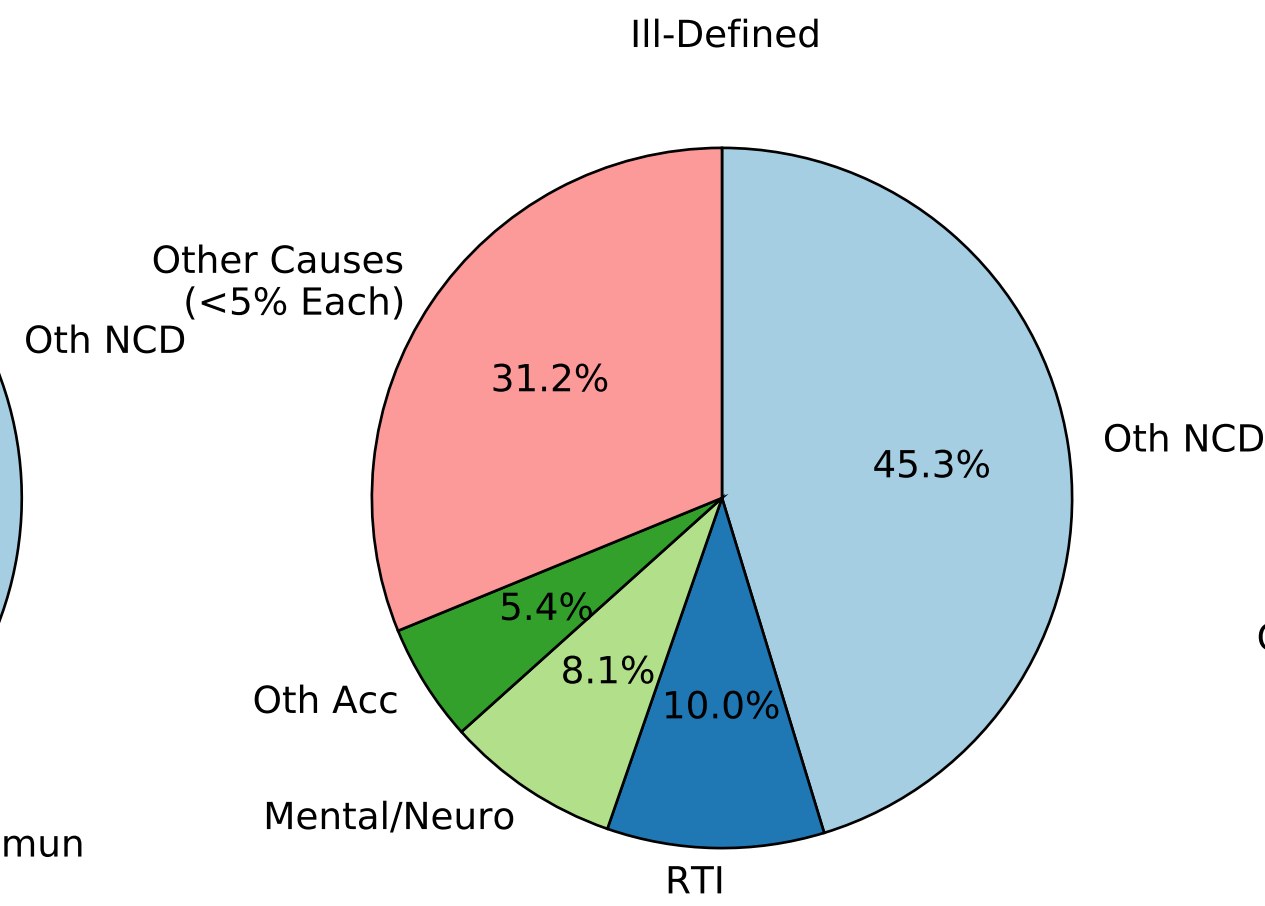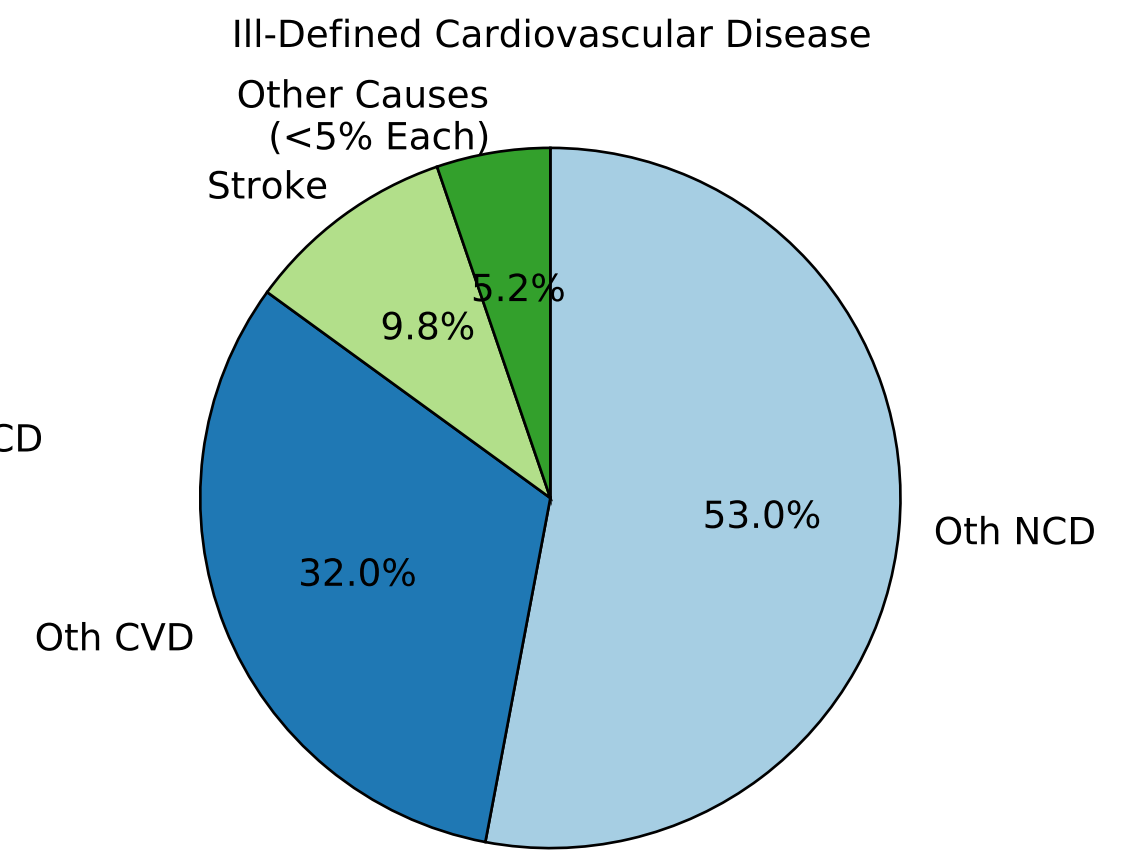

### Ill-Defined Injury

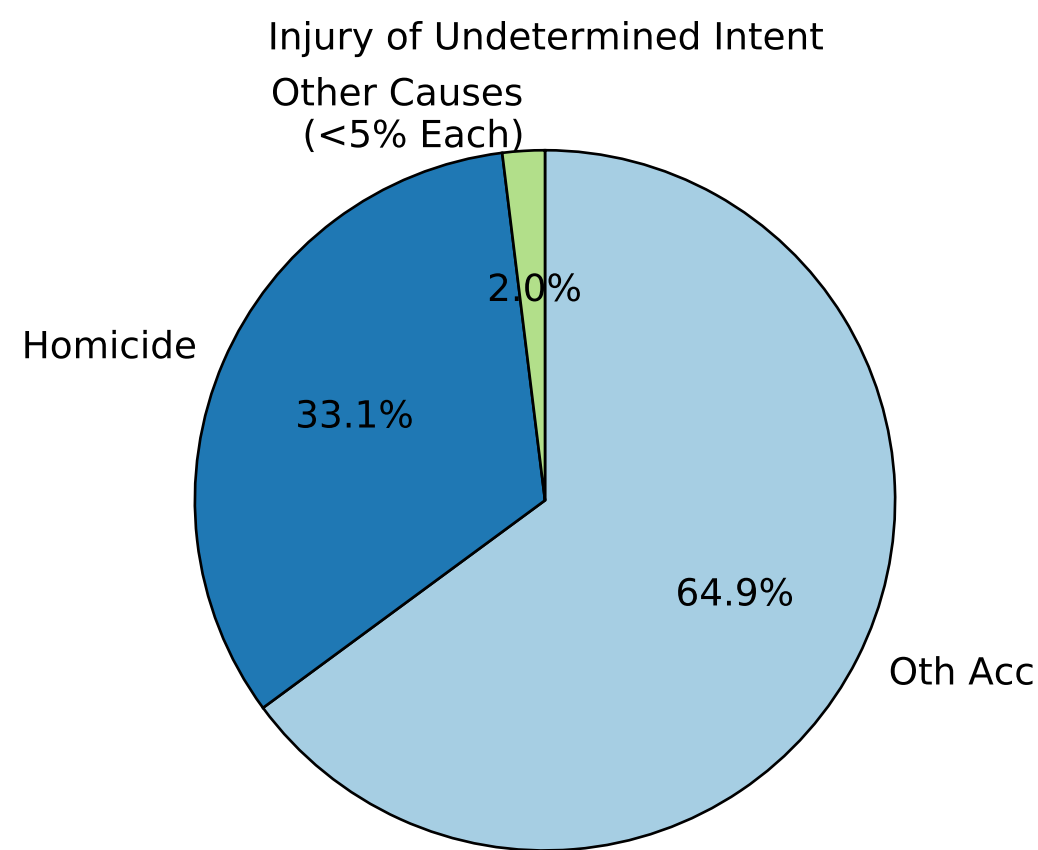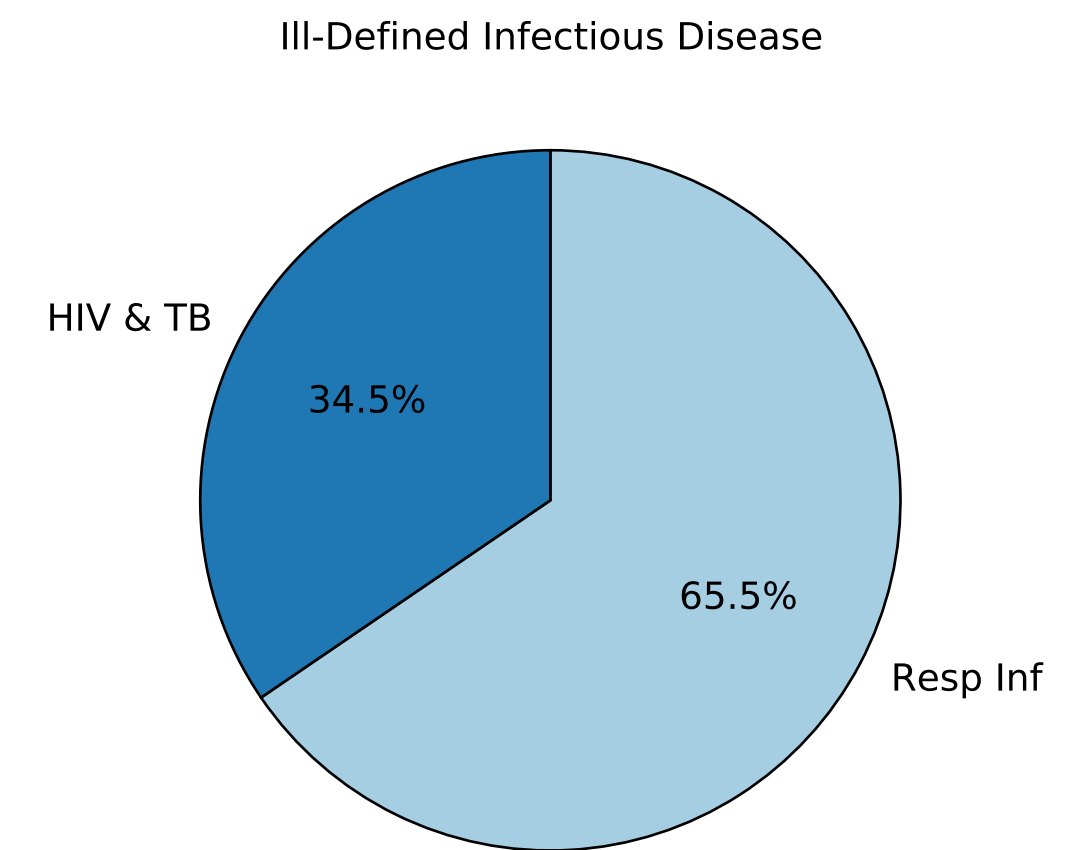

ICD 10  
Female, Age 10

Septicemia

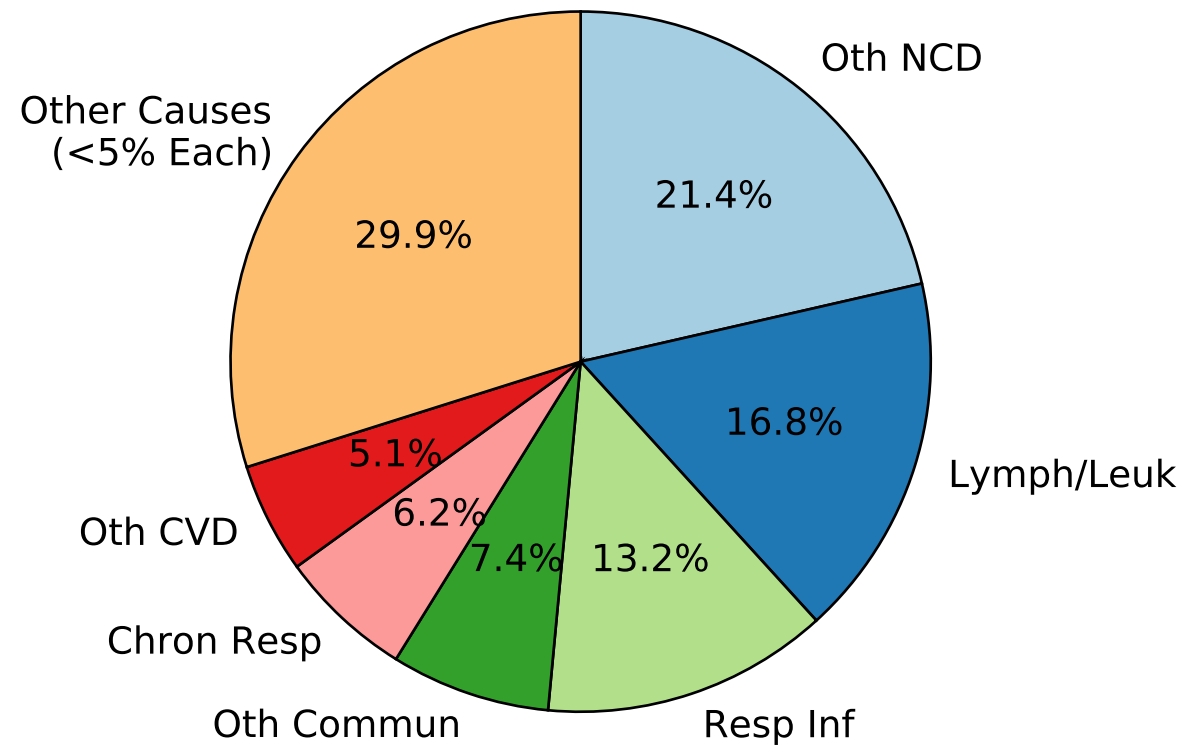

Heart Failure

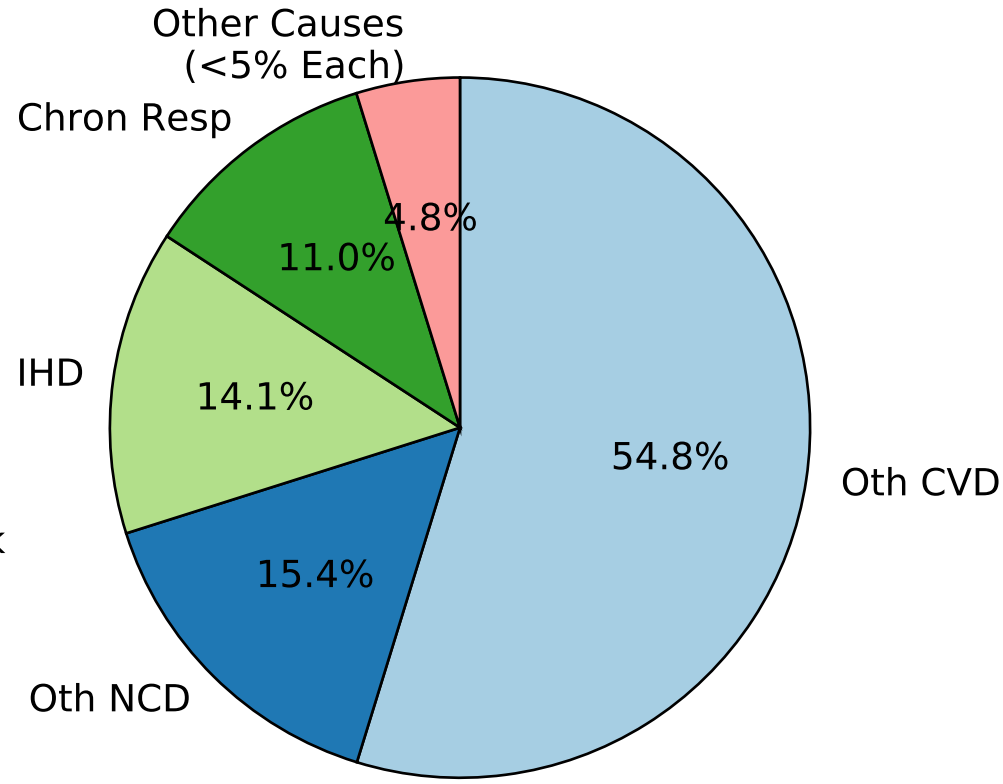

Ill-Defined Cancers

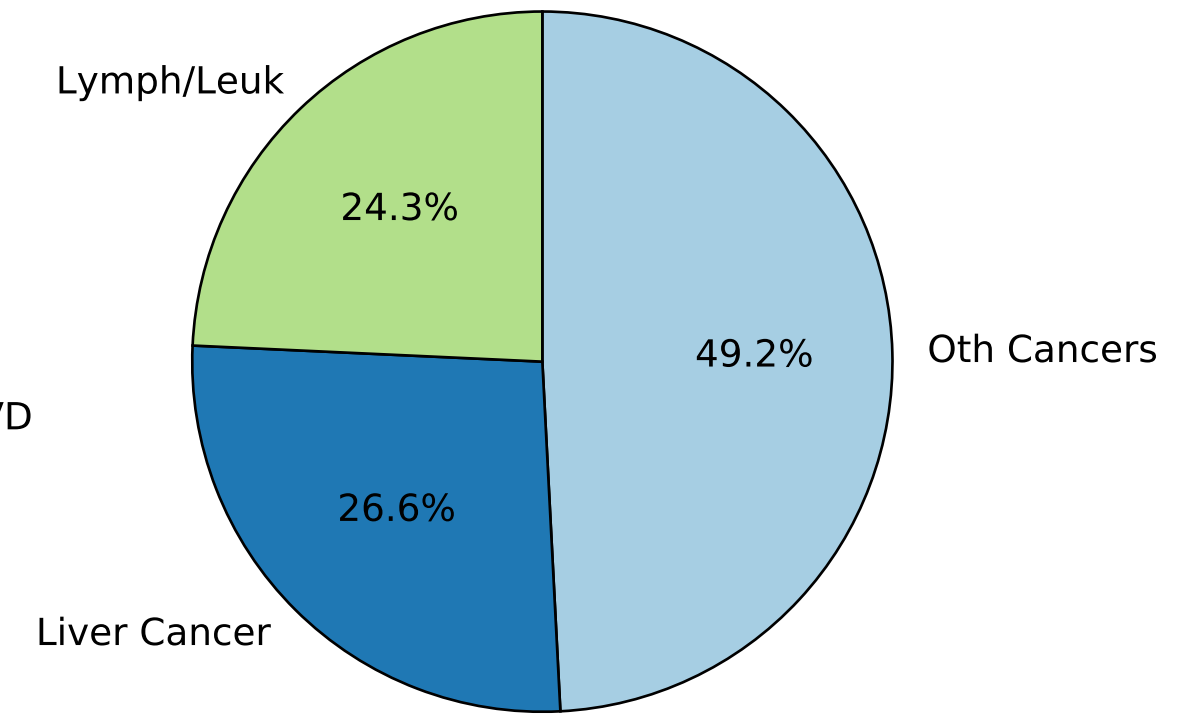

Volume Depletion

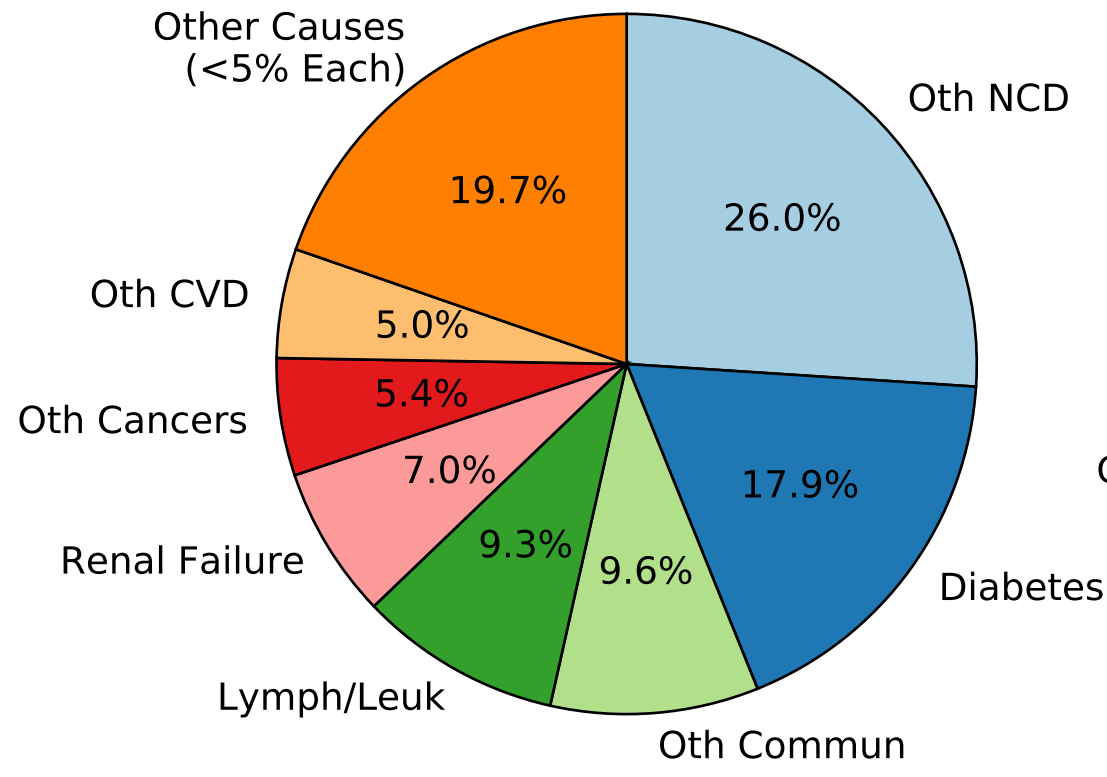

Ill-Defined

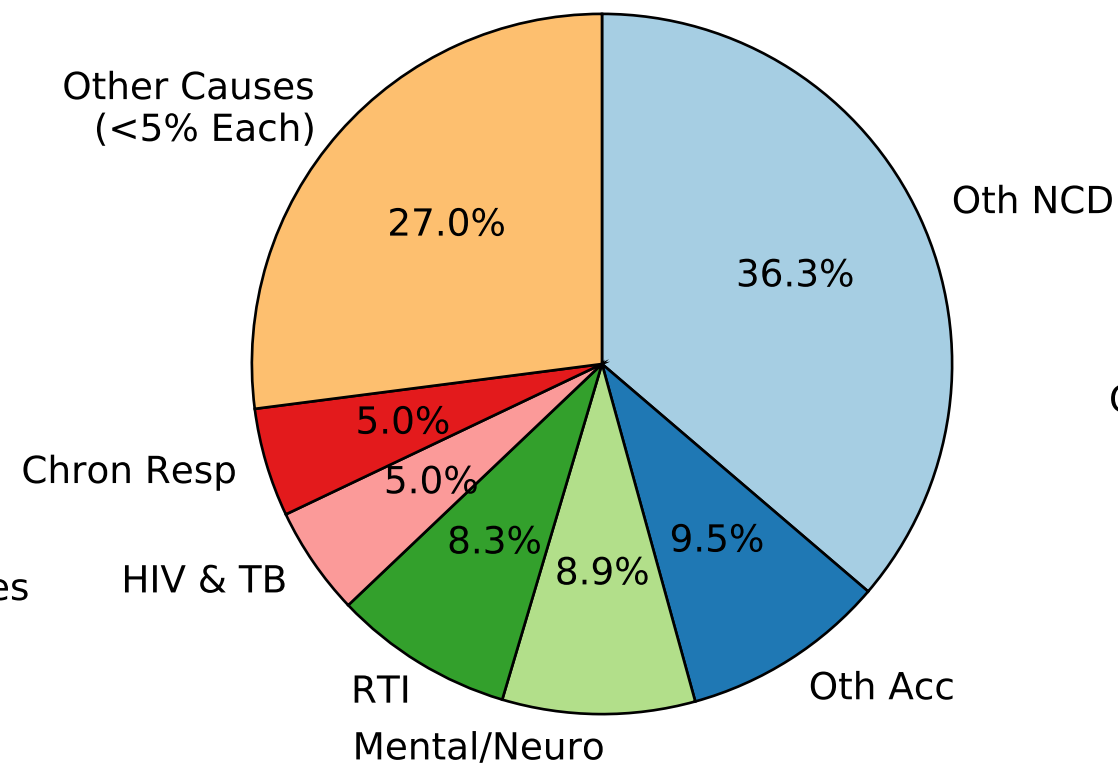

Ill-Defined Cardiovascular Disease

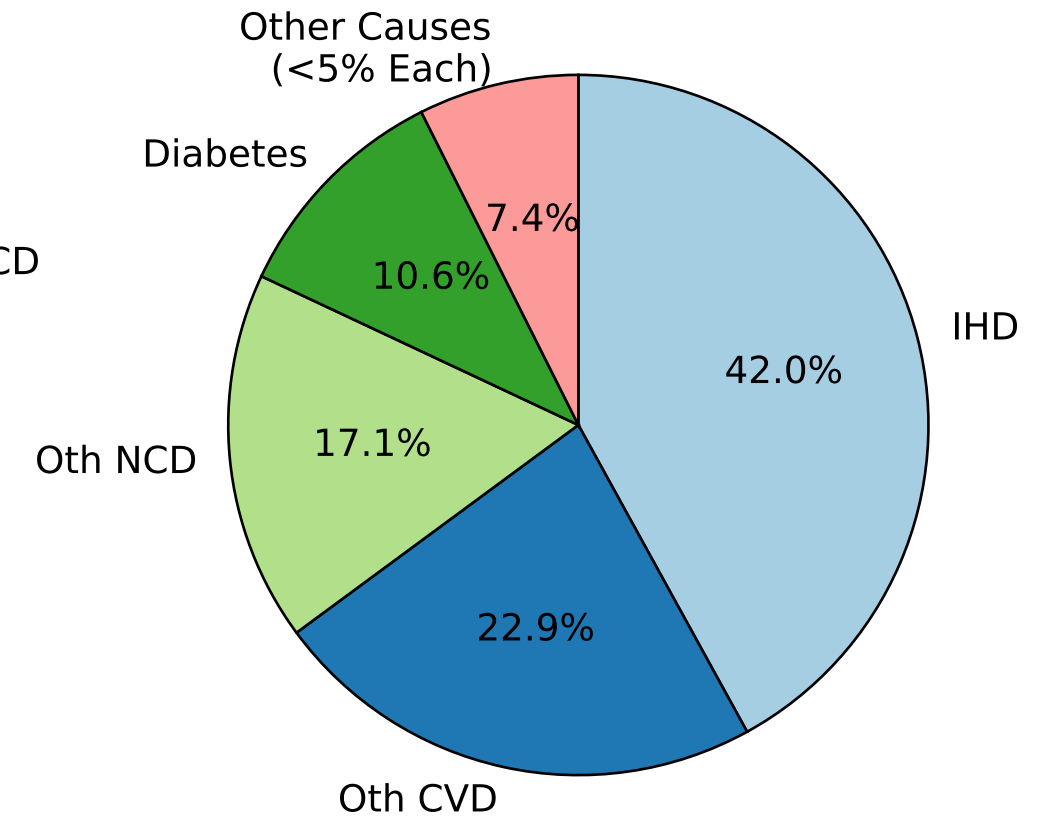

Ill-Defined Injury

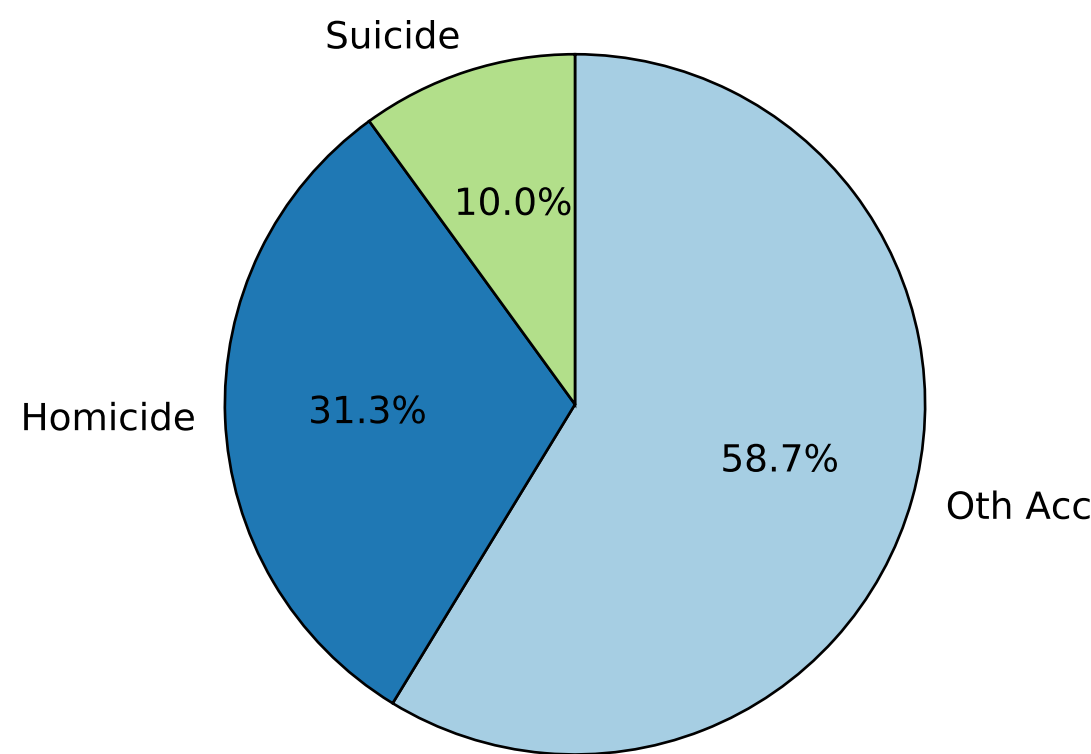

Injury of Undetermined Intent

Ill-Defined Infectious Disease

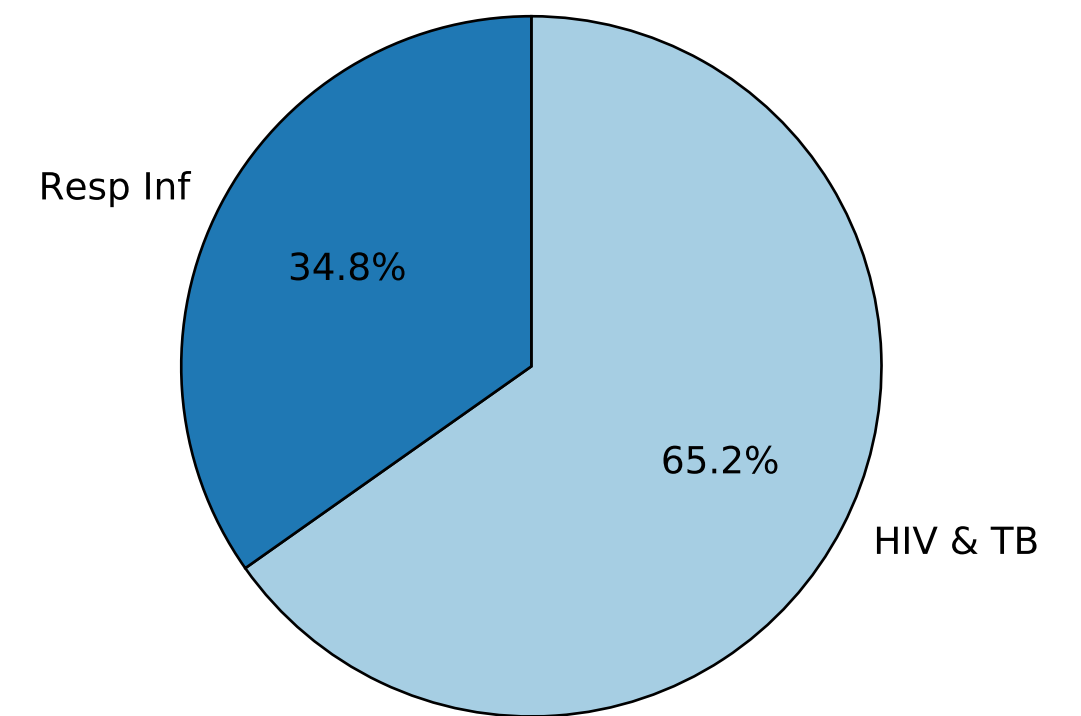

ICD 10  
Female, Age 15

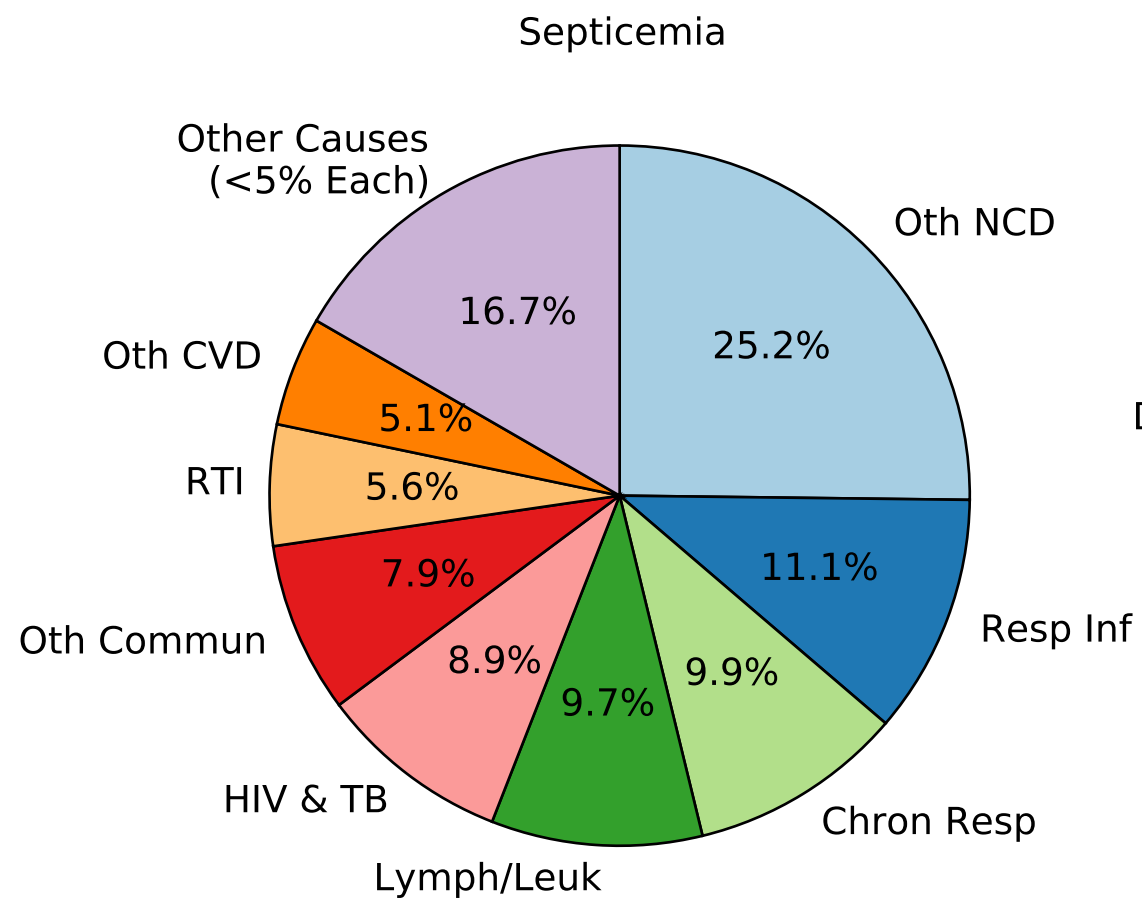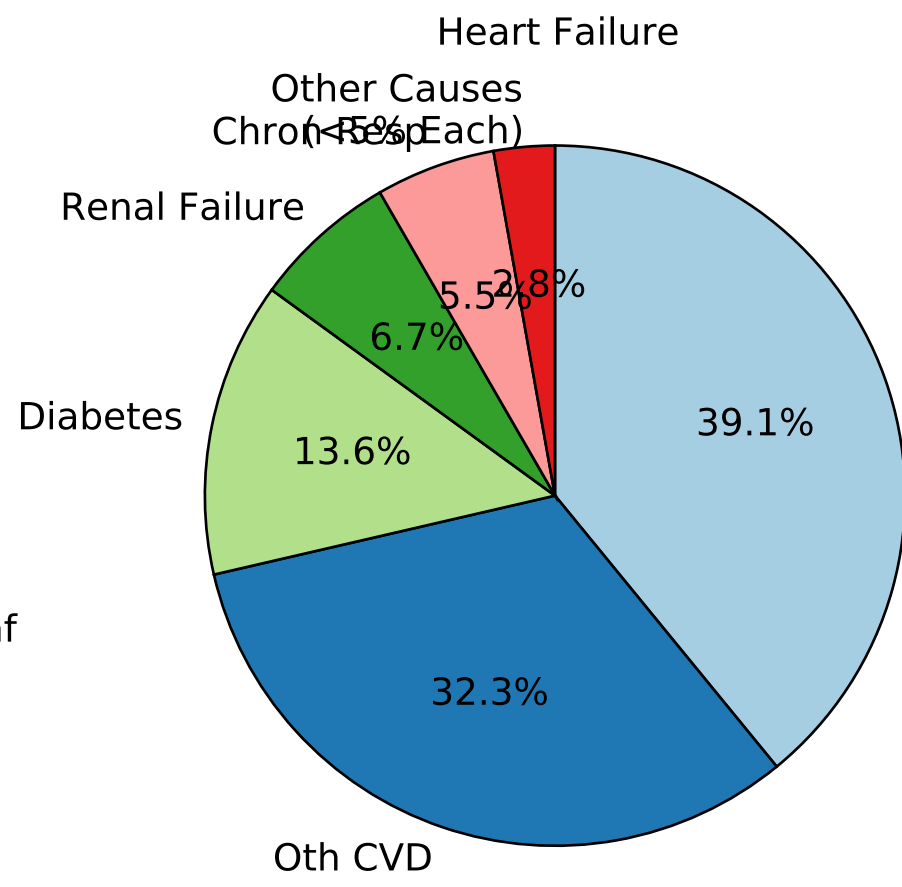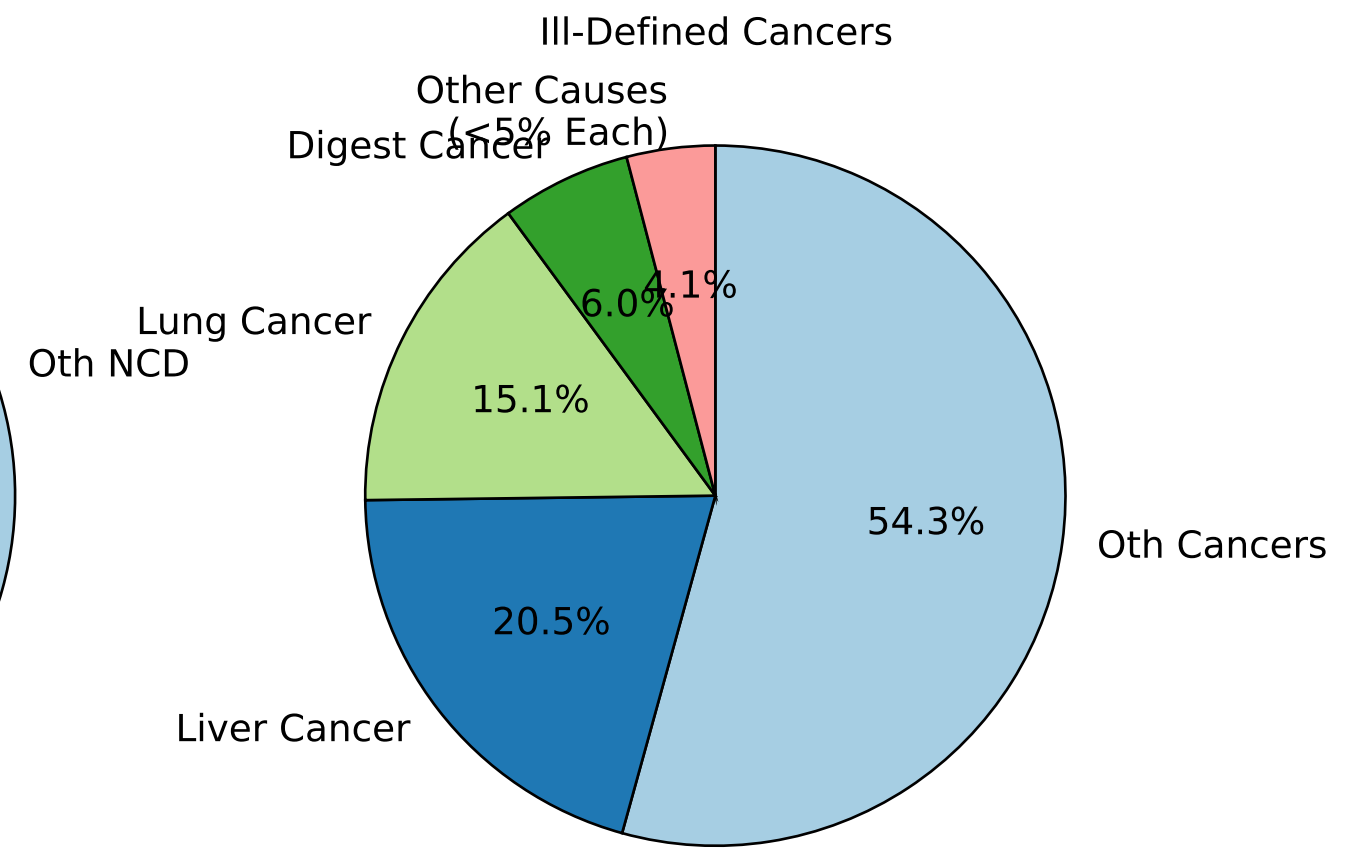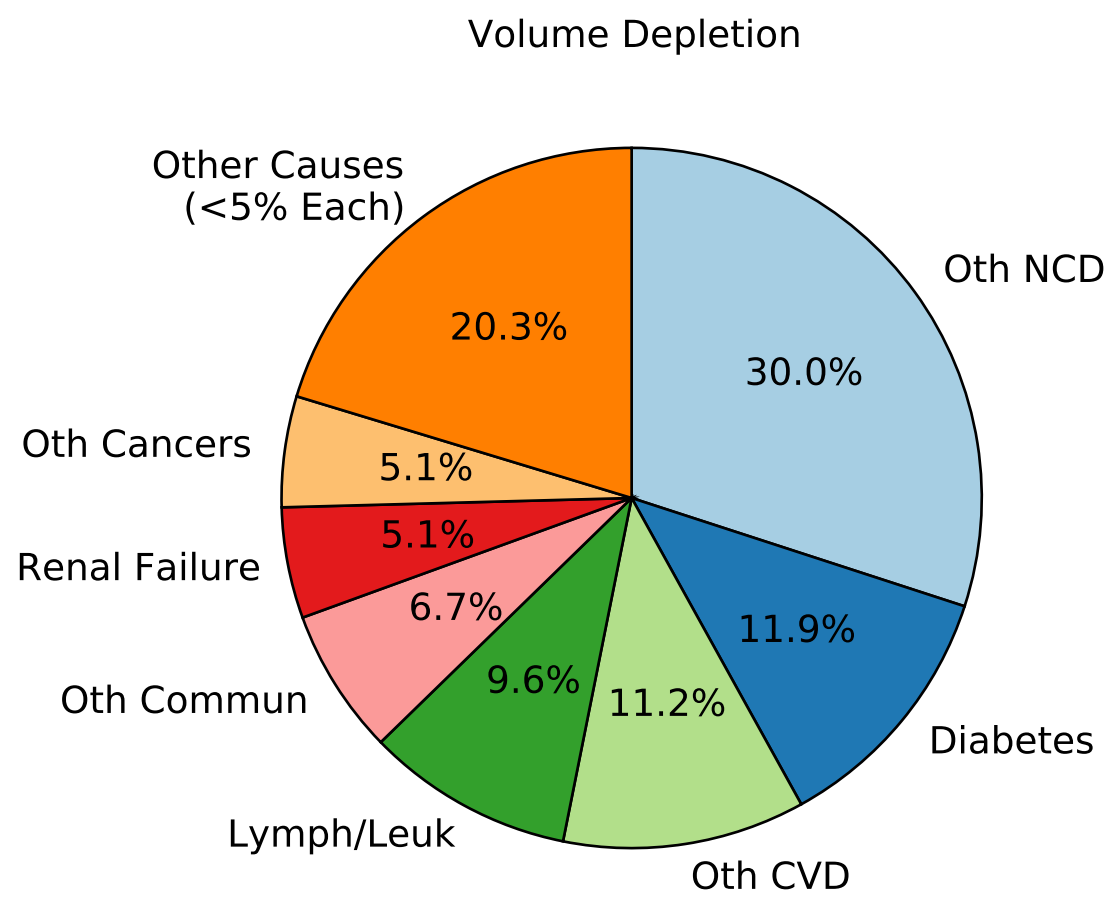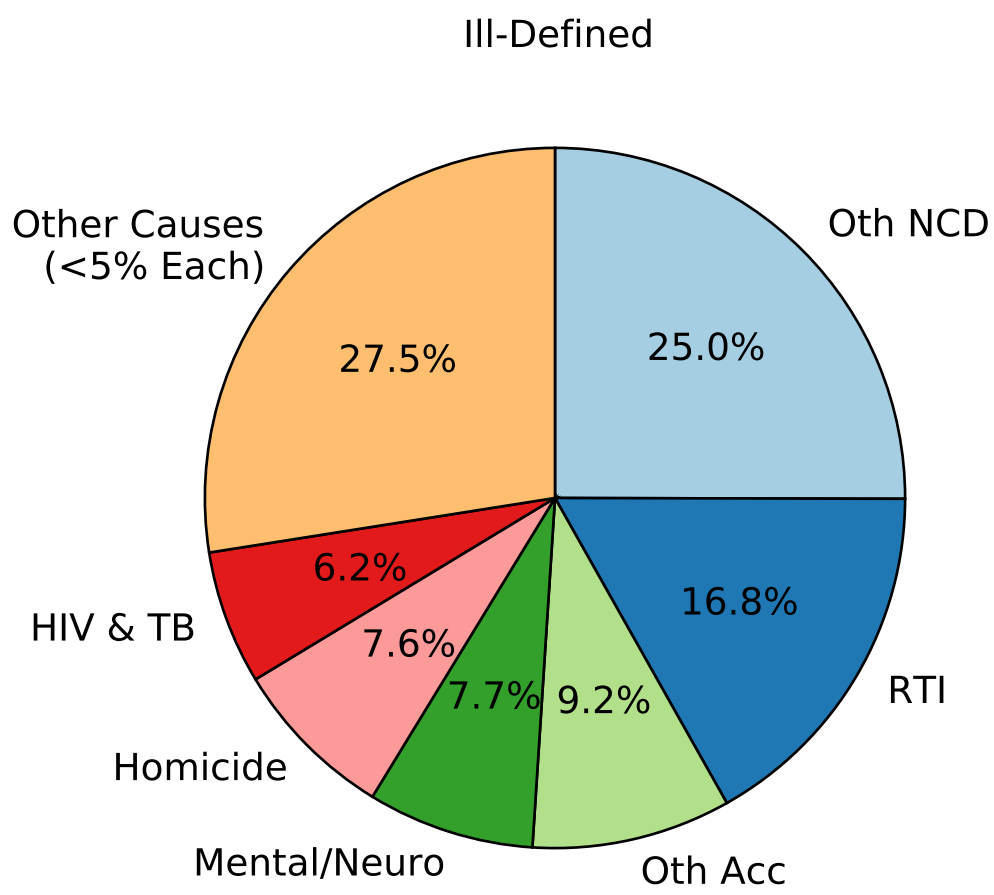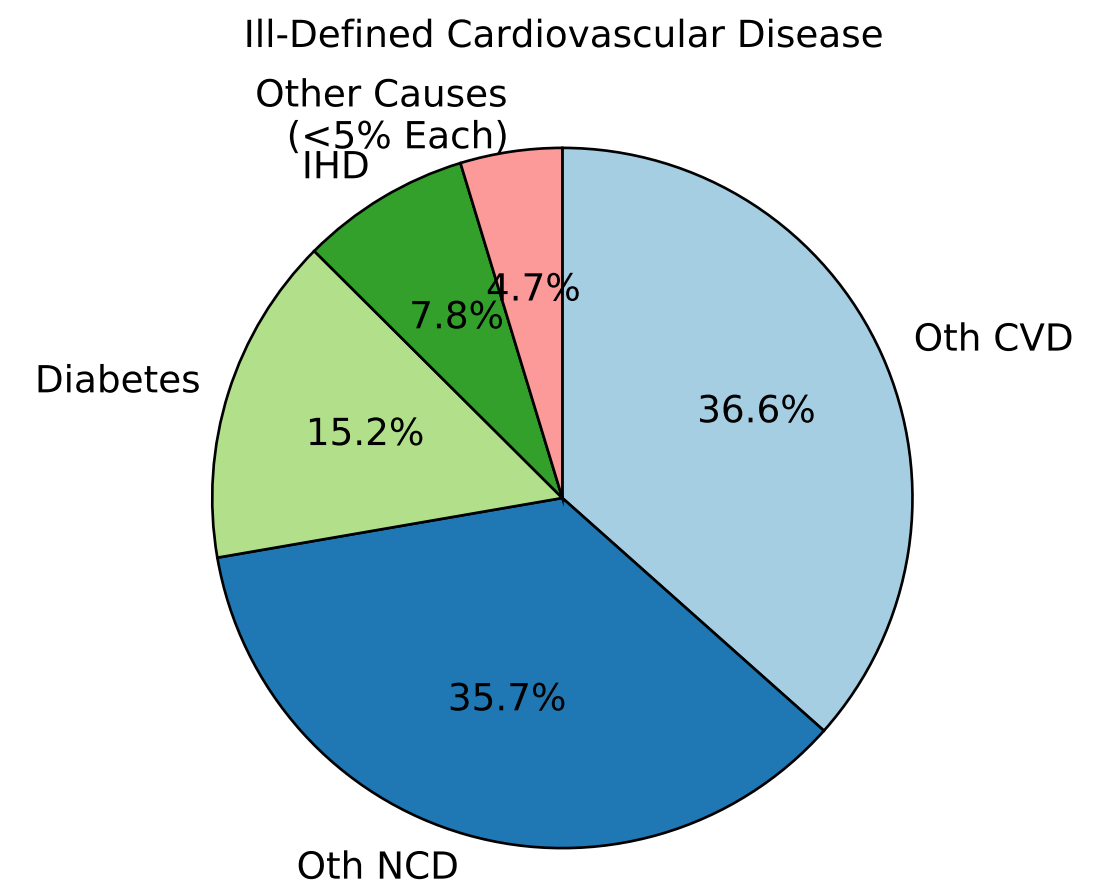

### Ill-Defined Injury

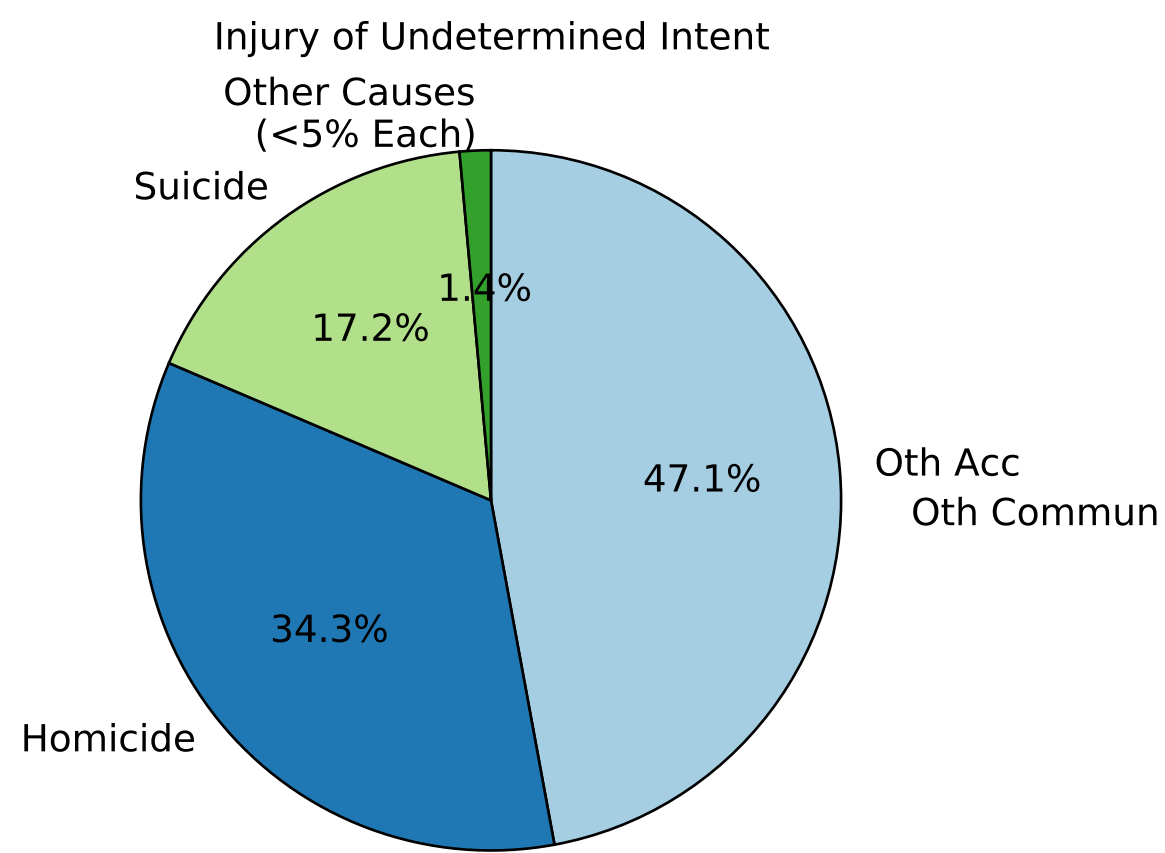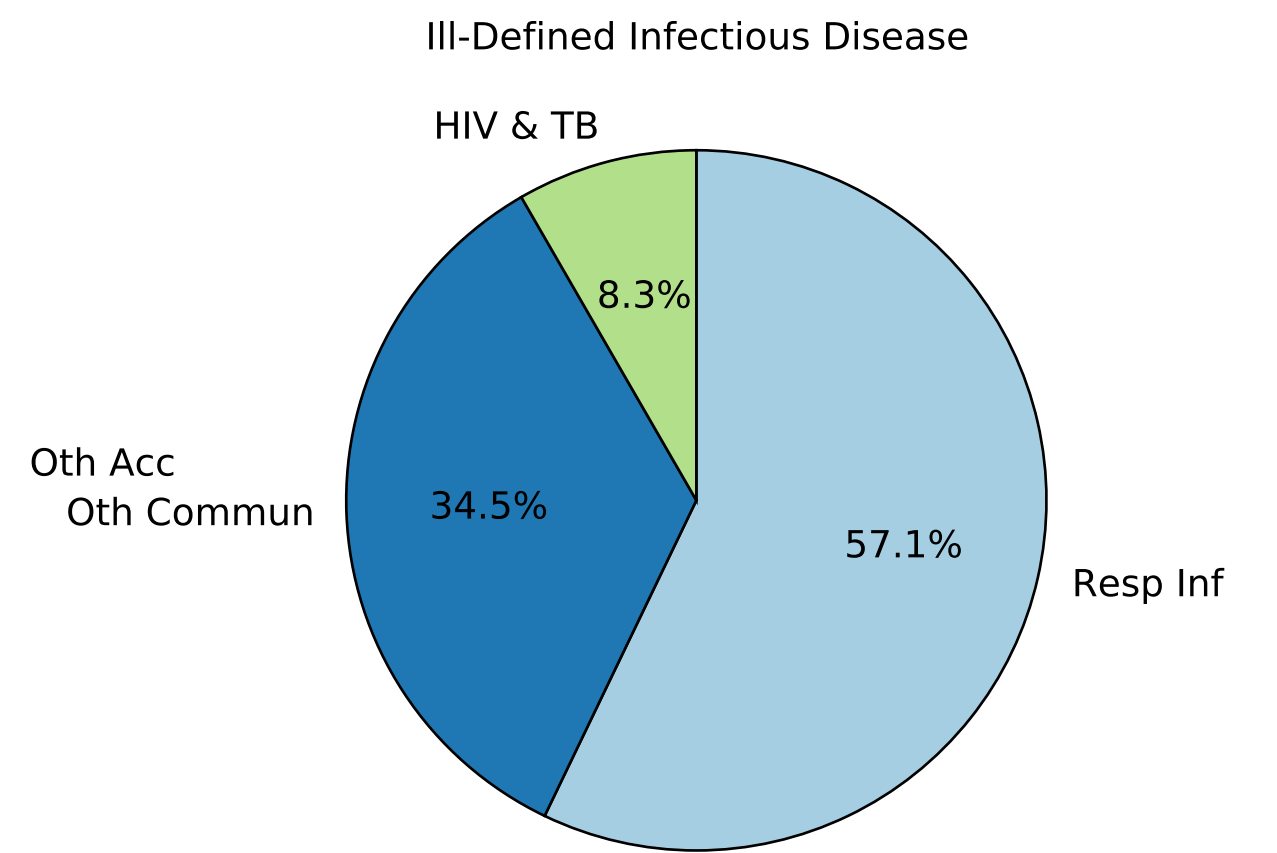



ICD 10  
Female, Age 20

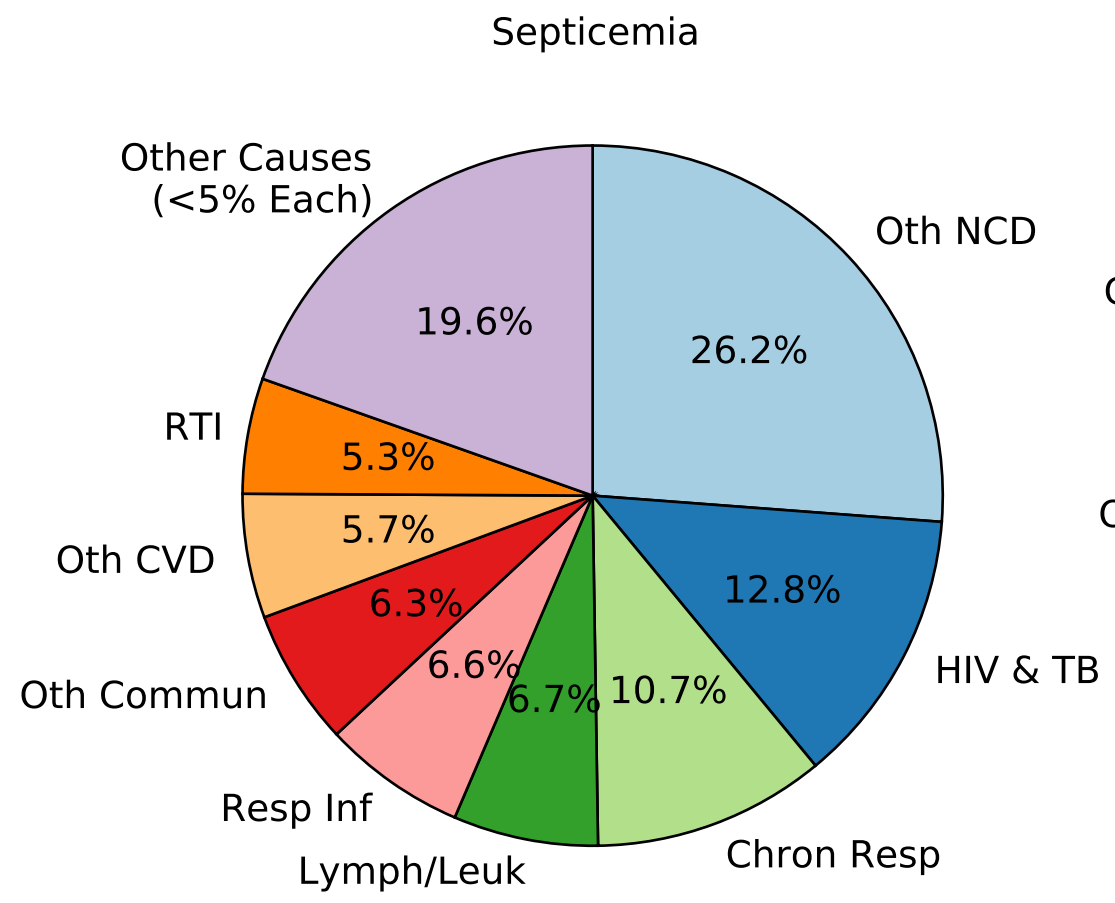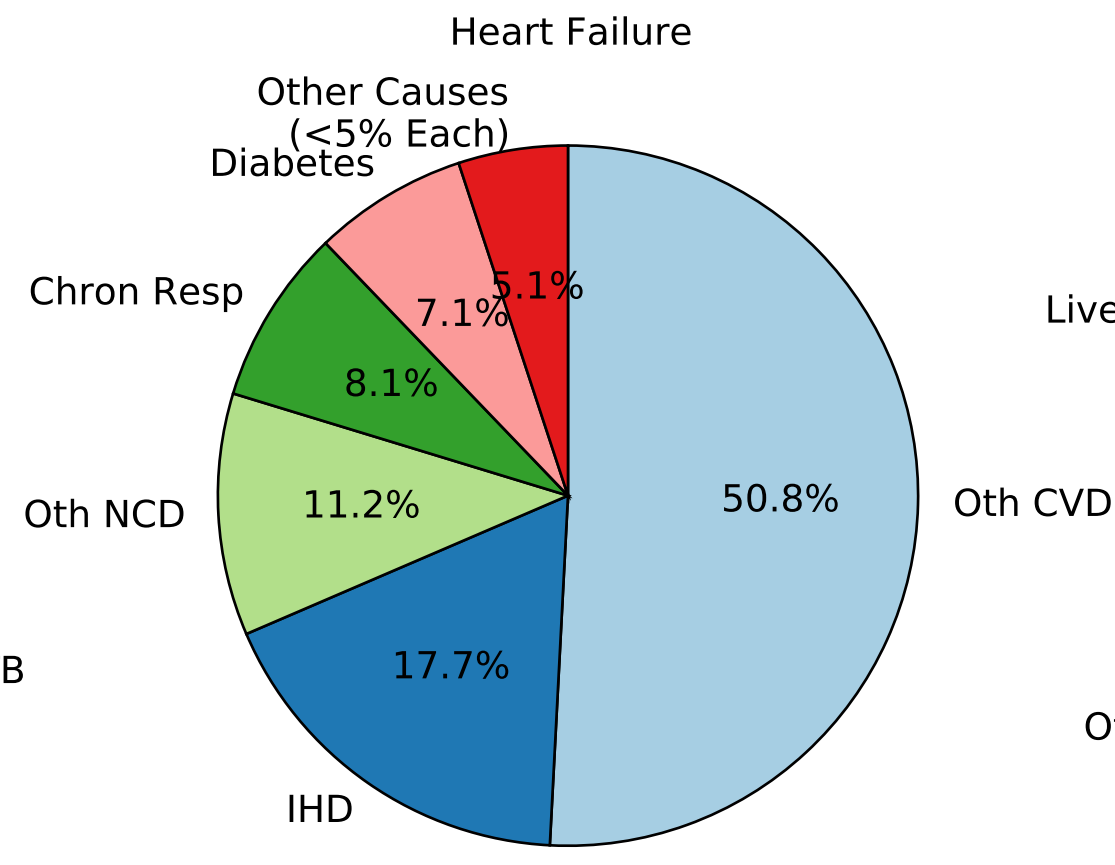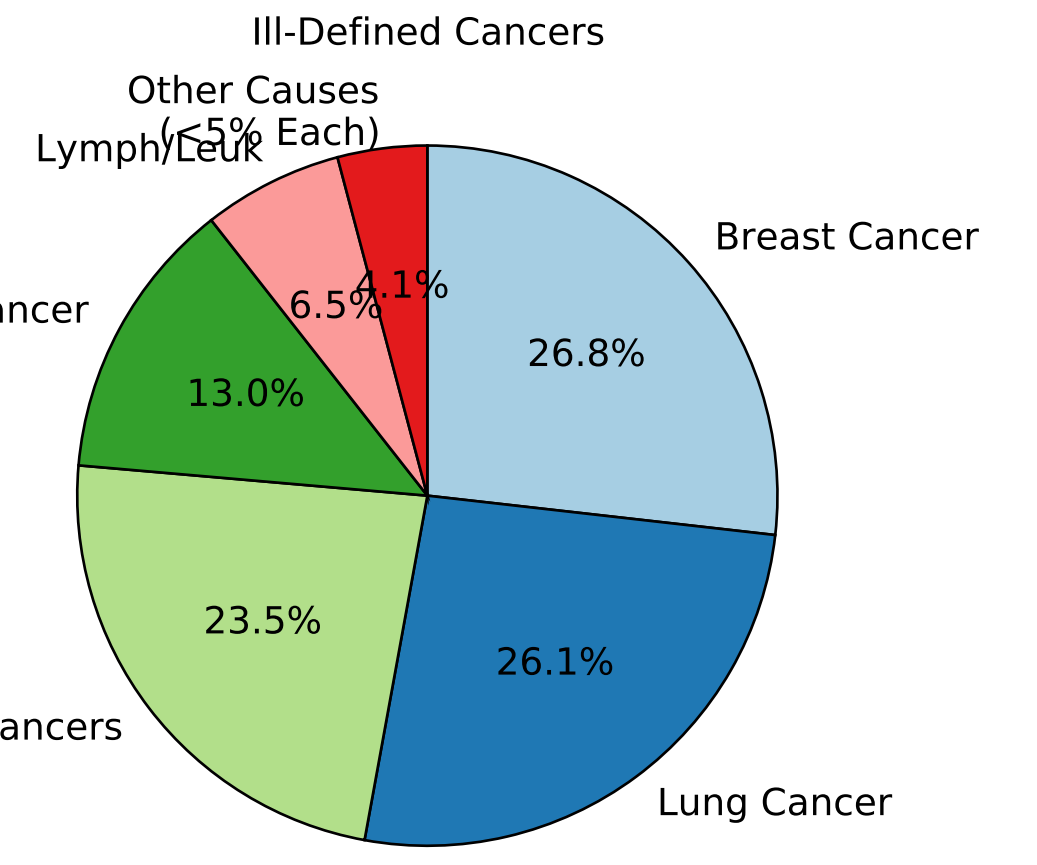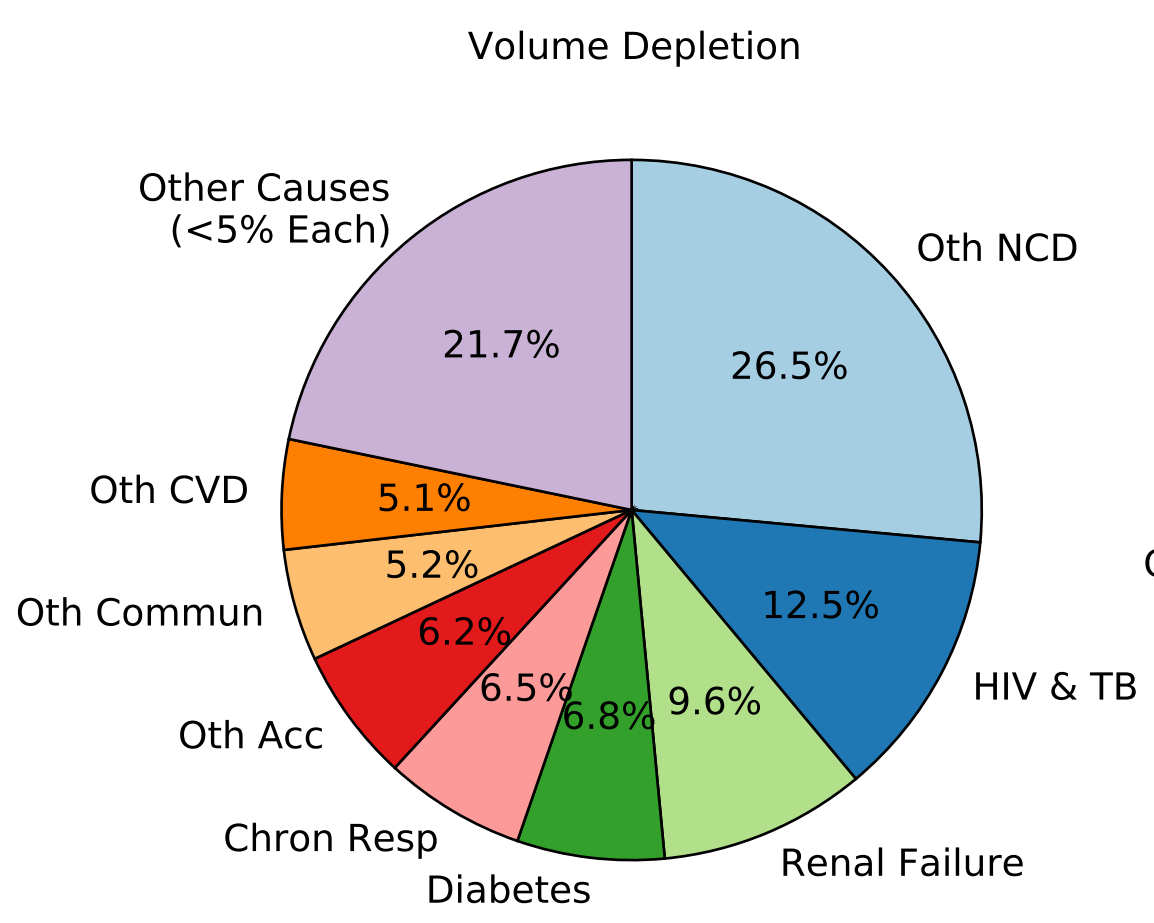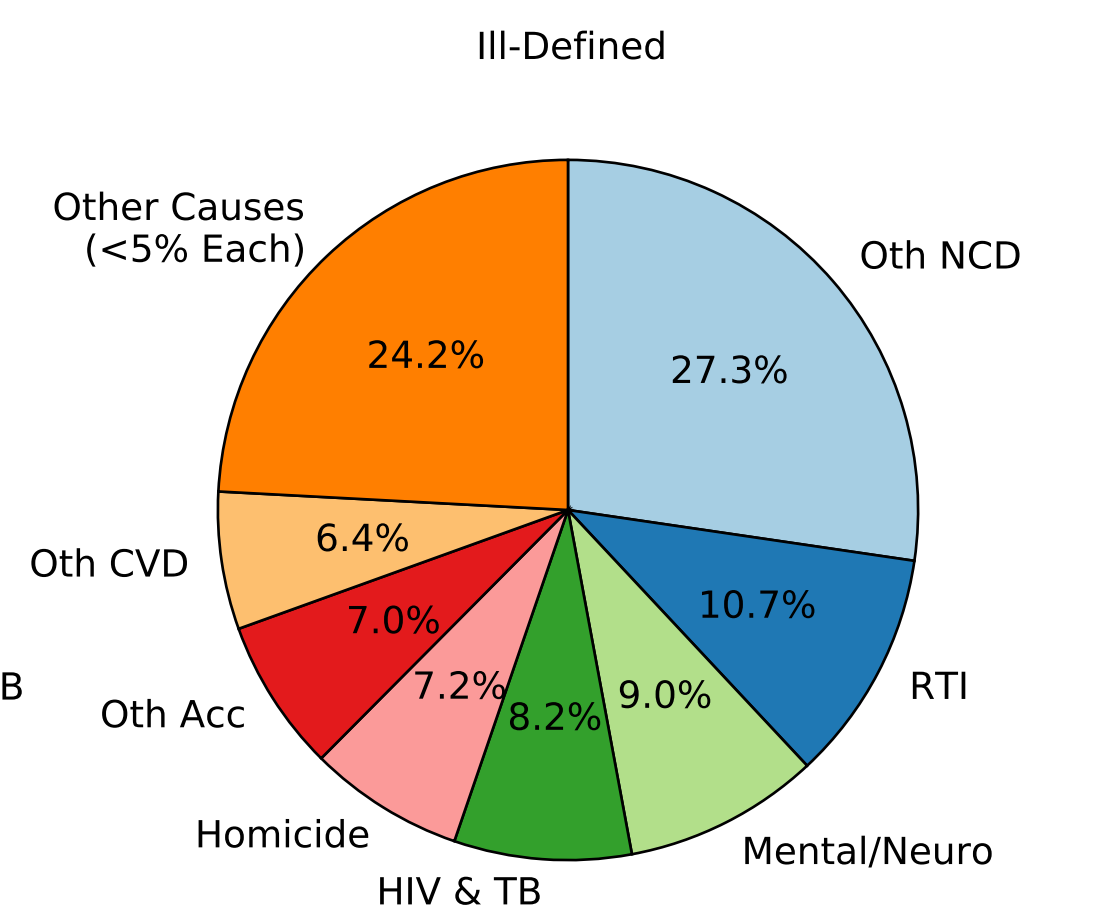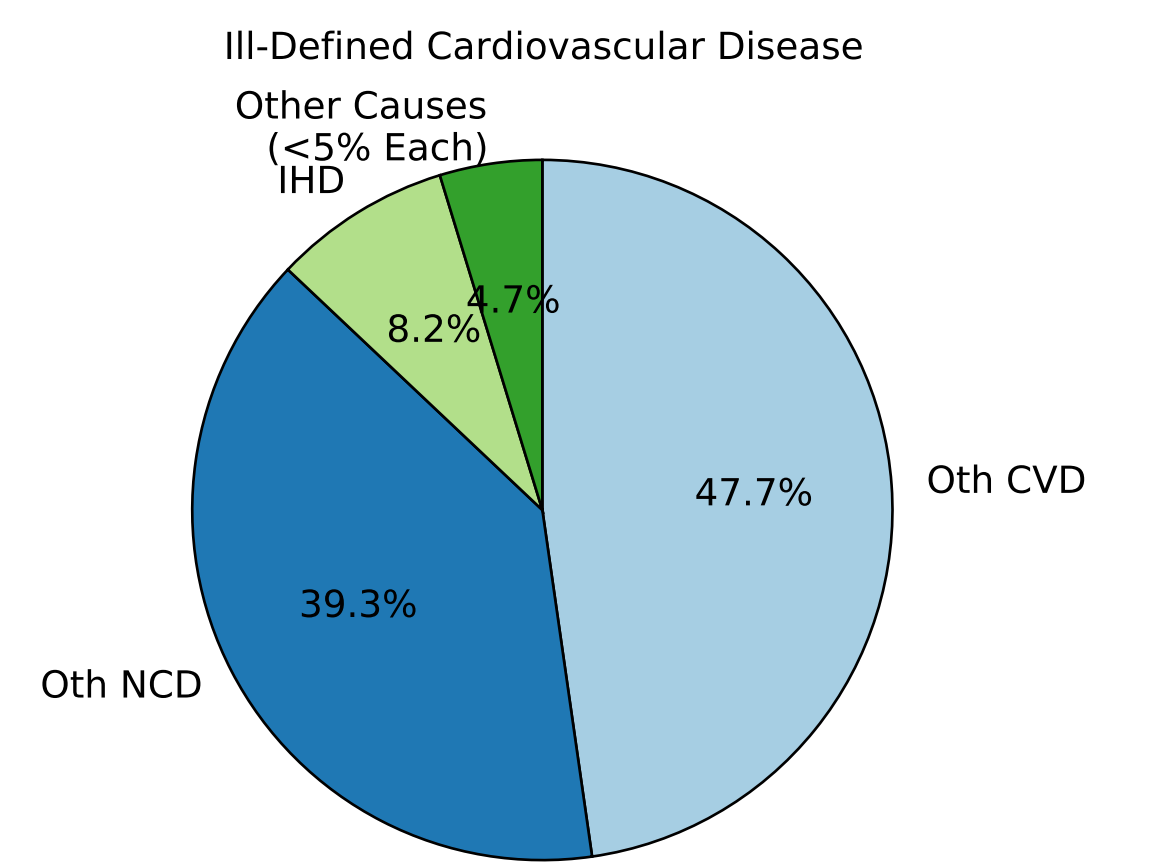

### Ill-Defined Injury

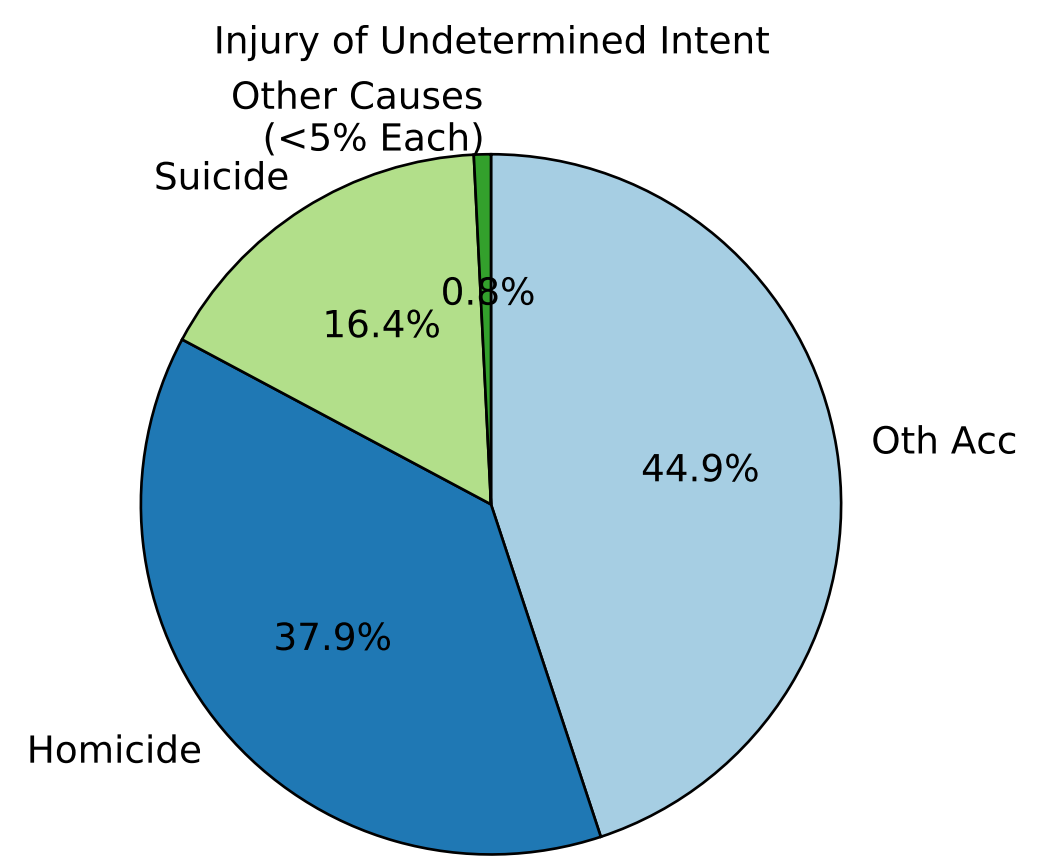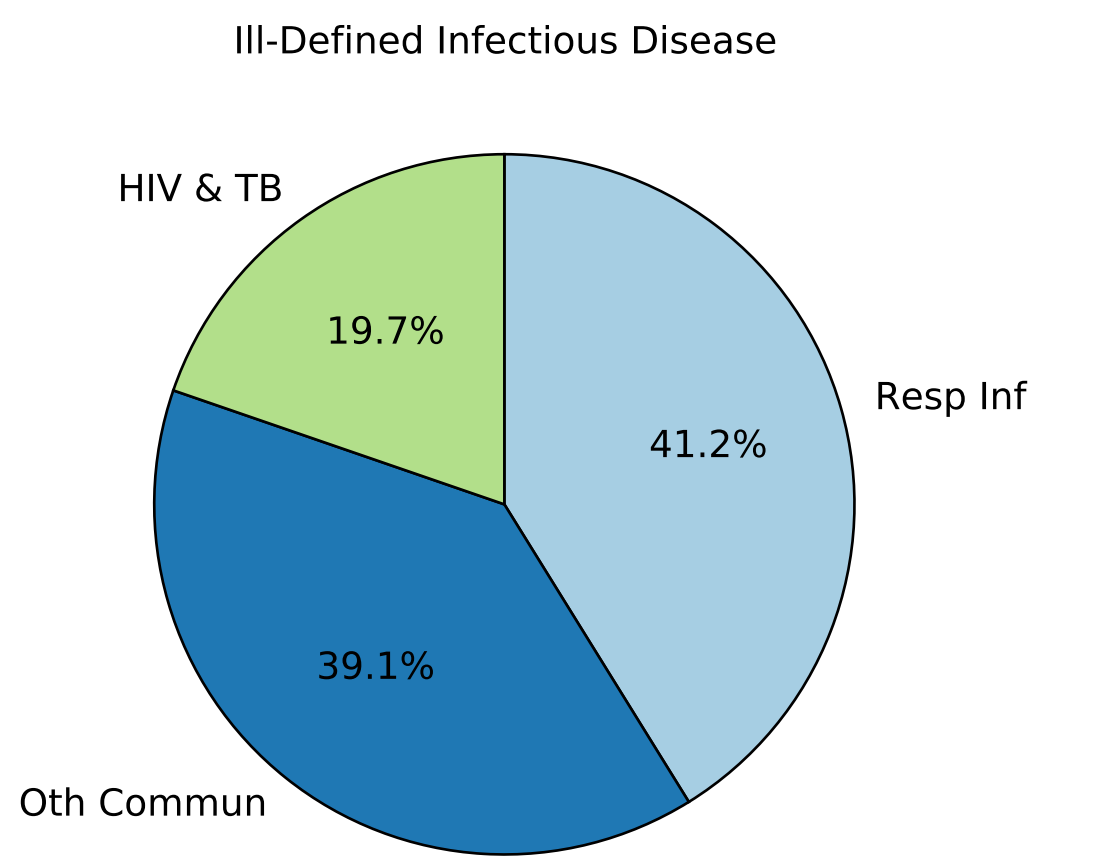

ICD 10  
Female, Age 25

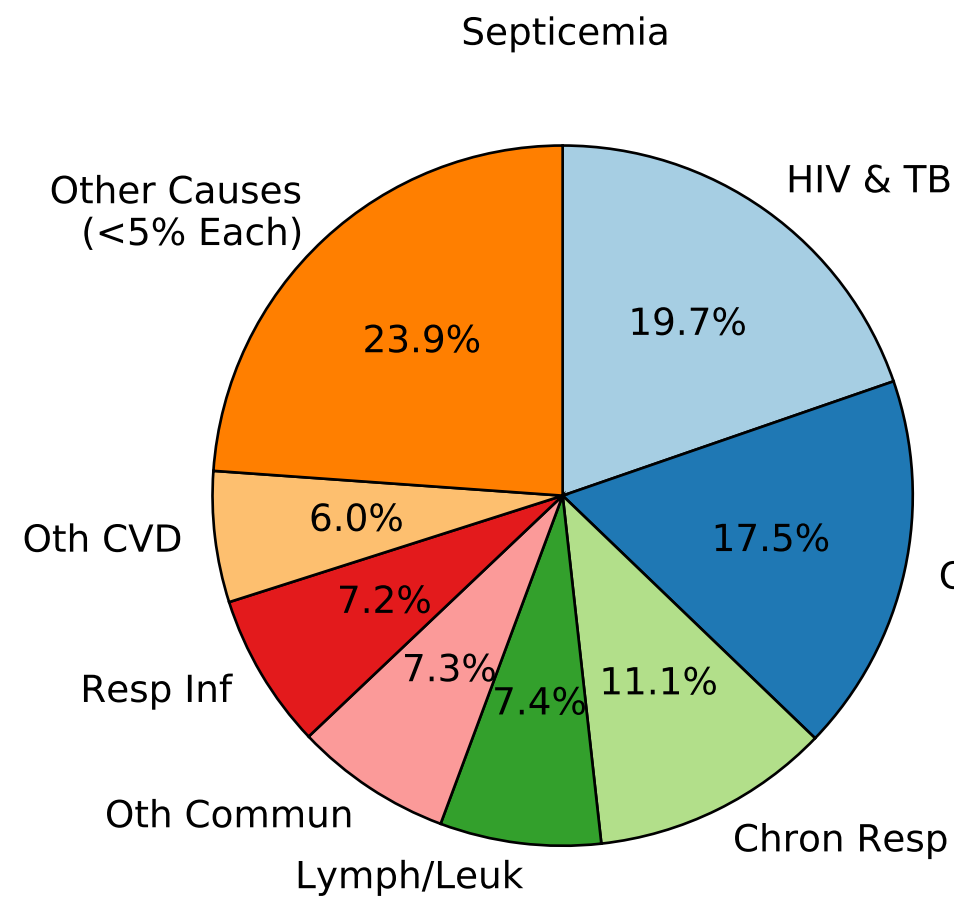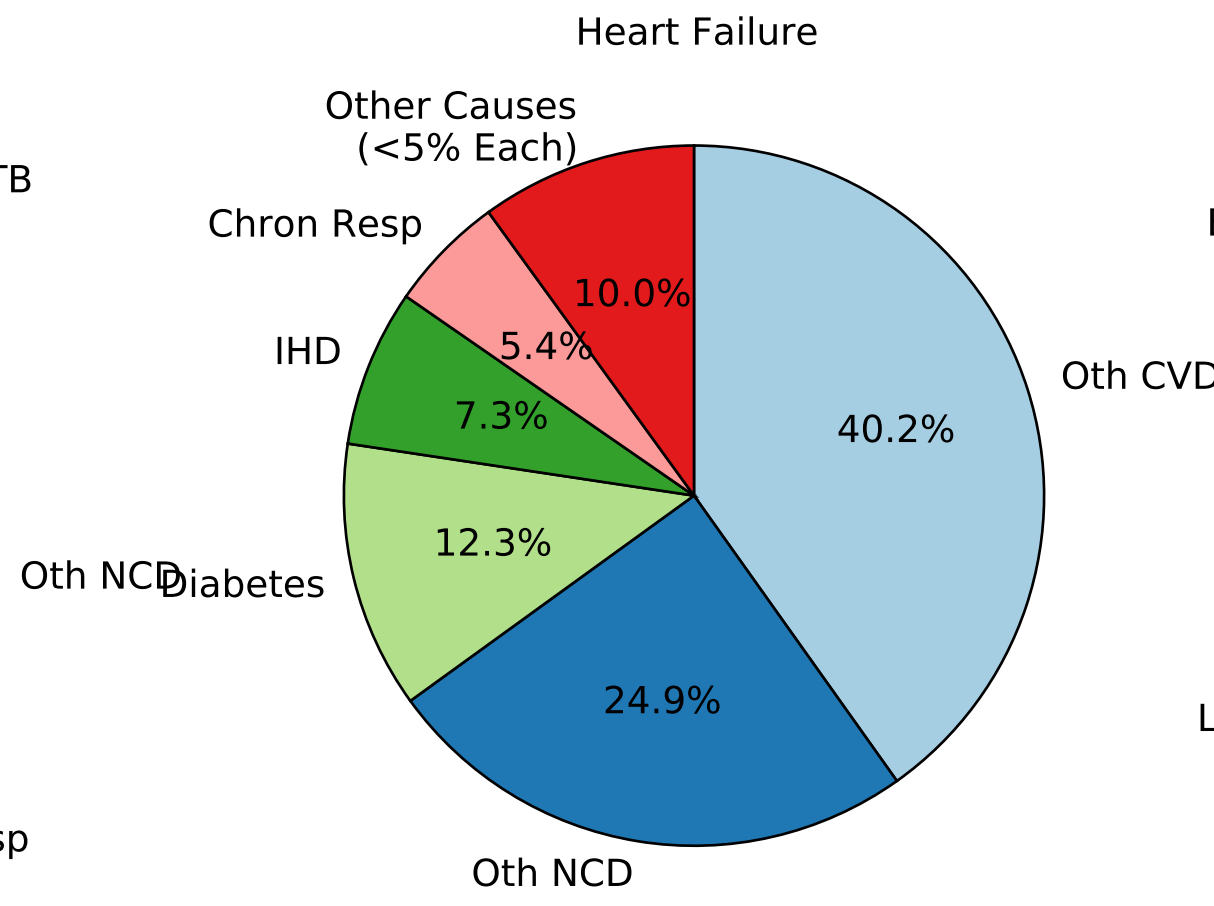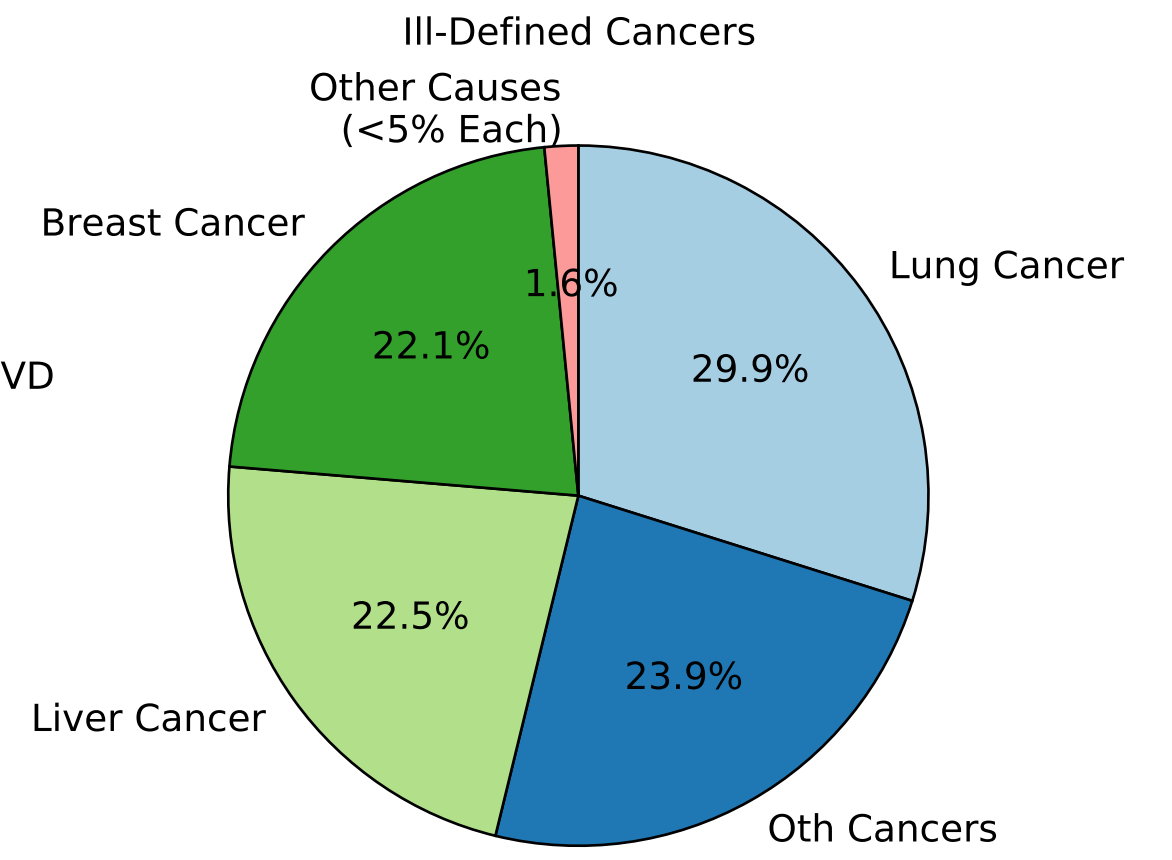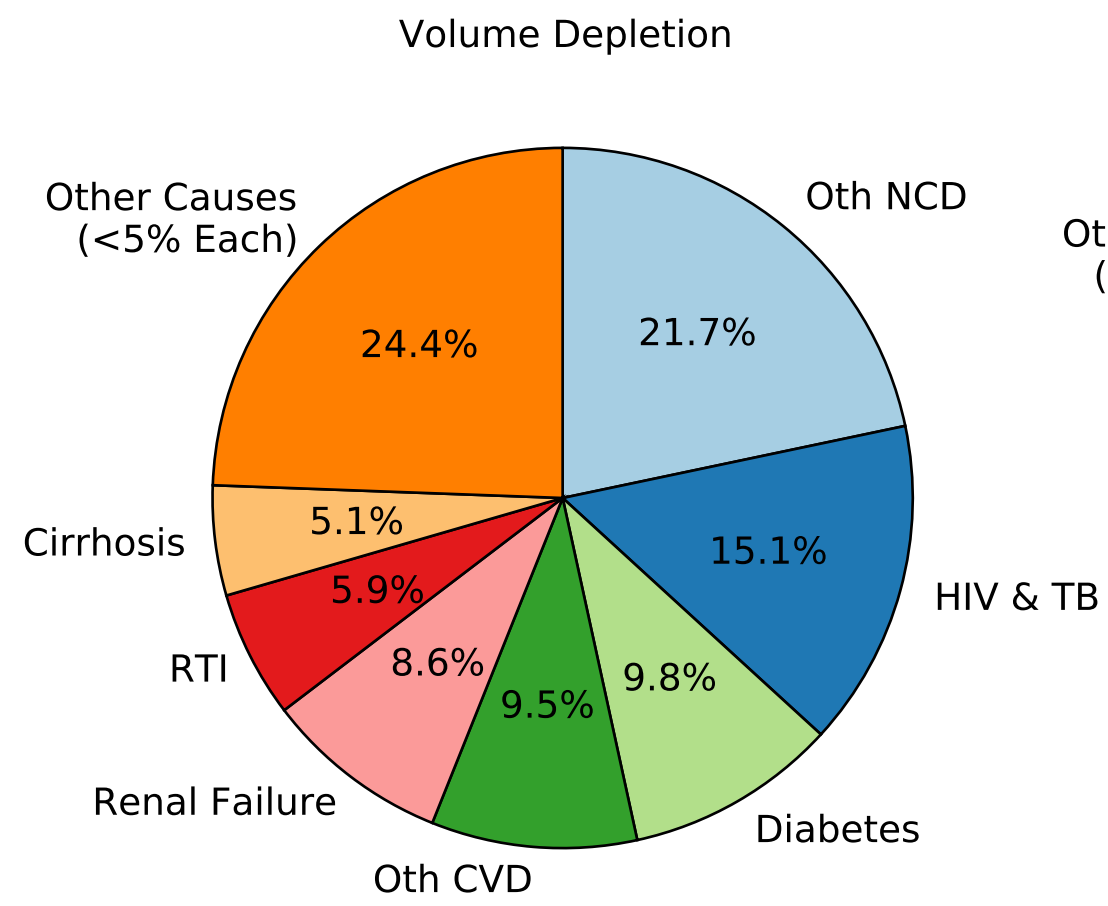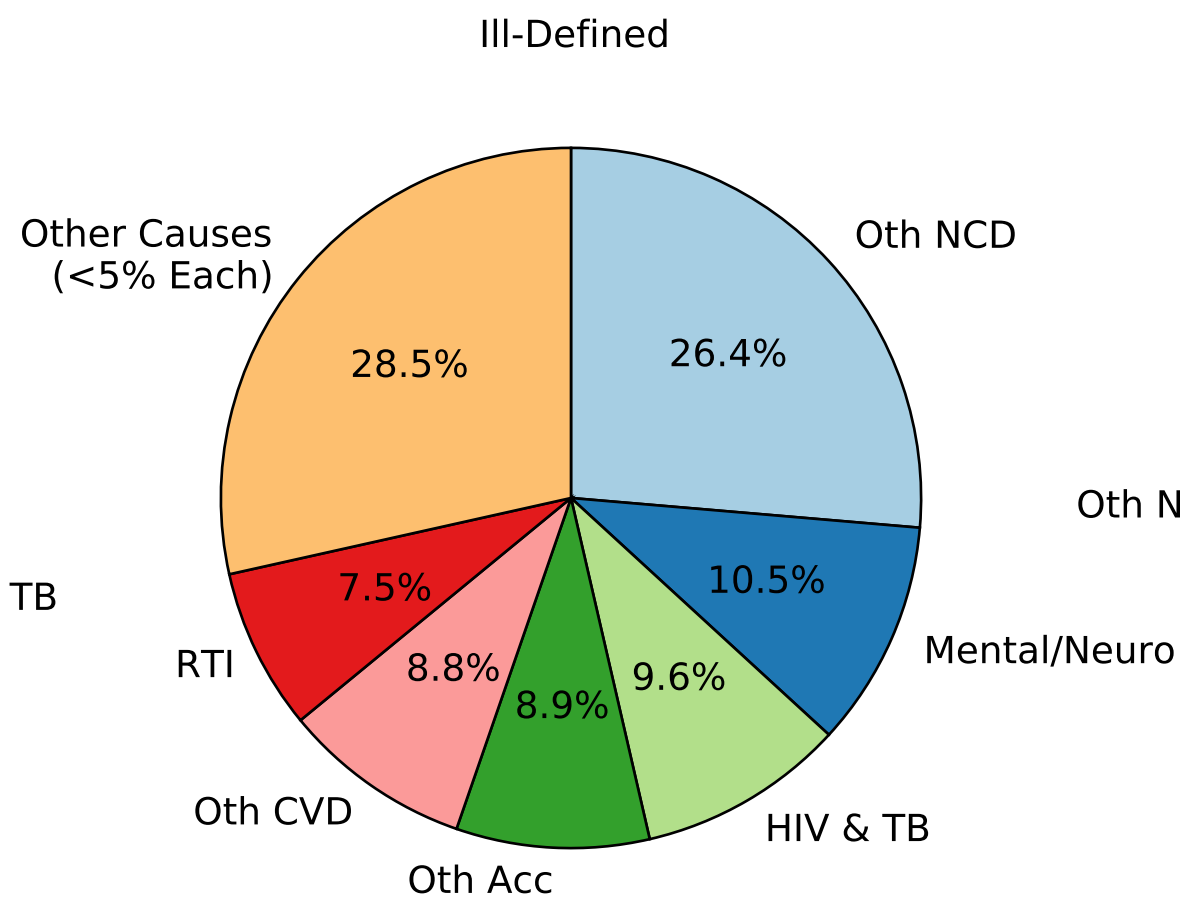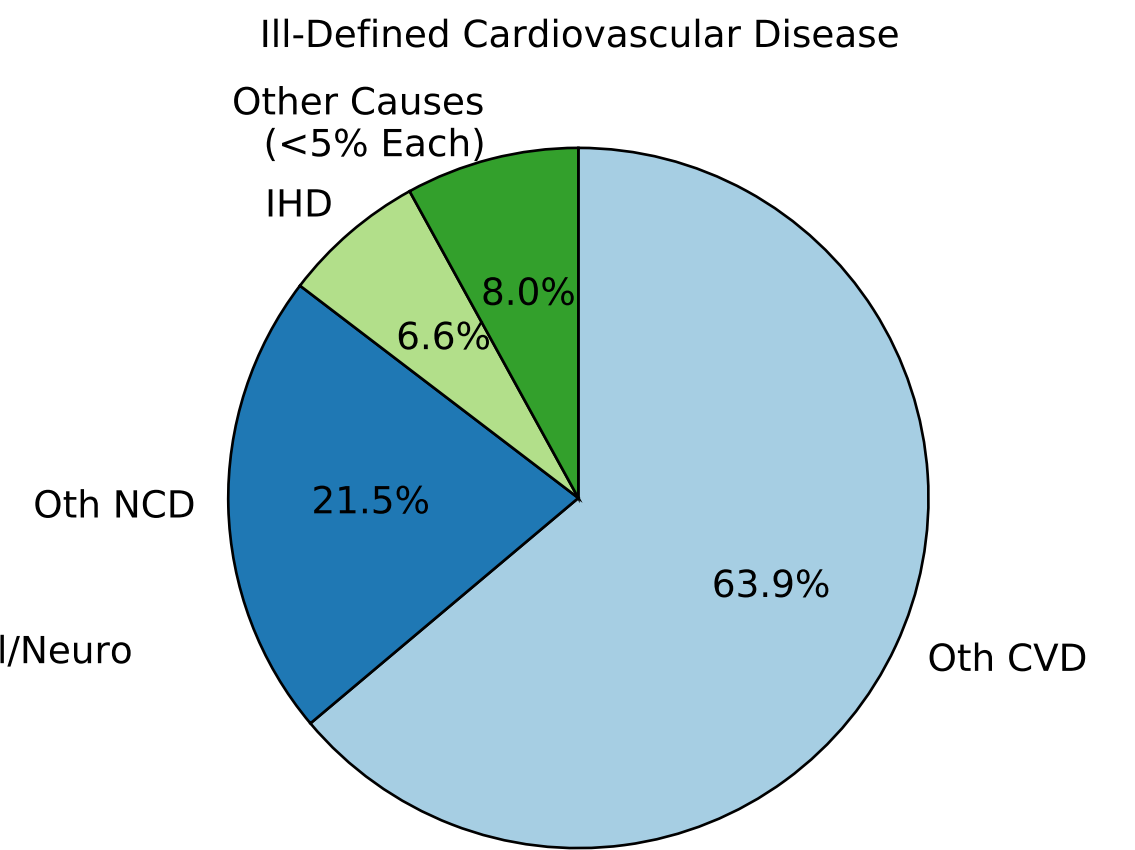

Ill-Defined Injury

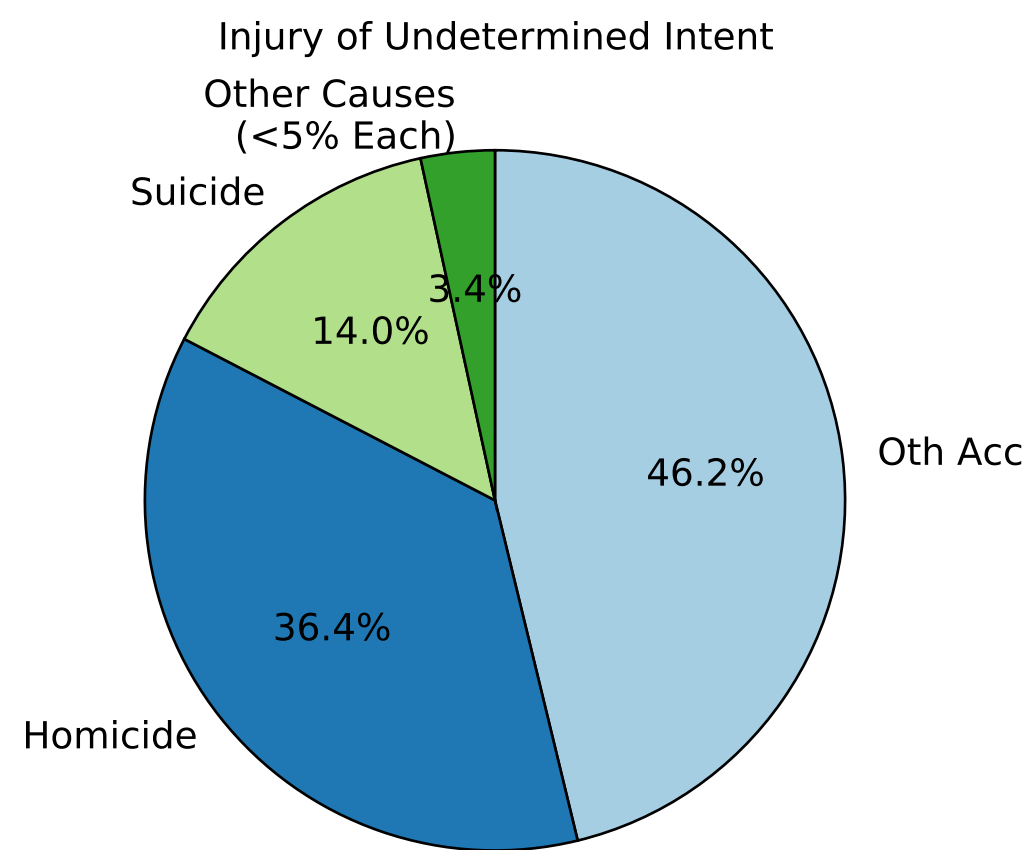

Ill-Defined Infectious Disease

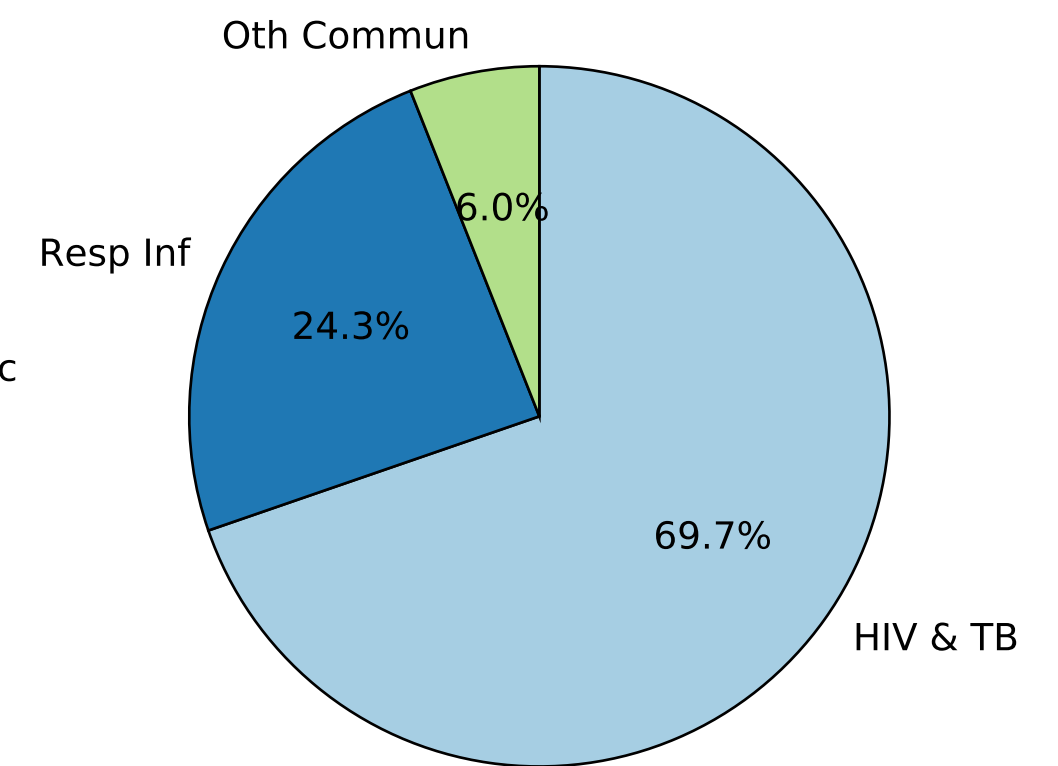

ICD 10  
Female, Age 30

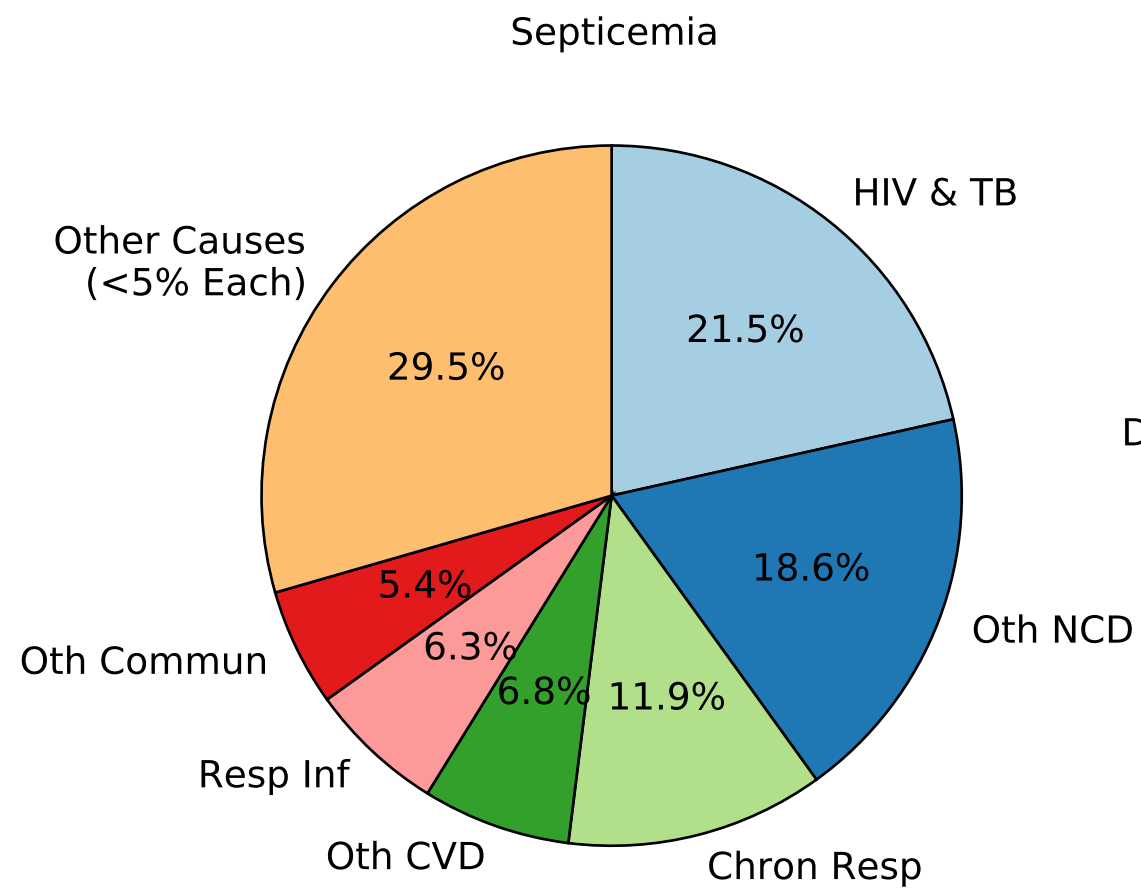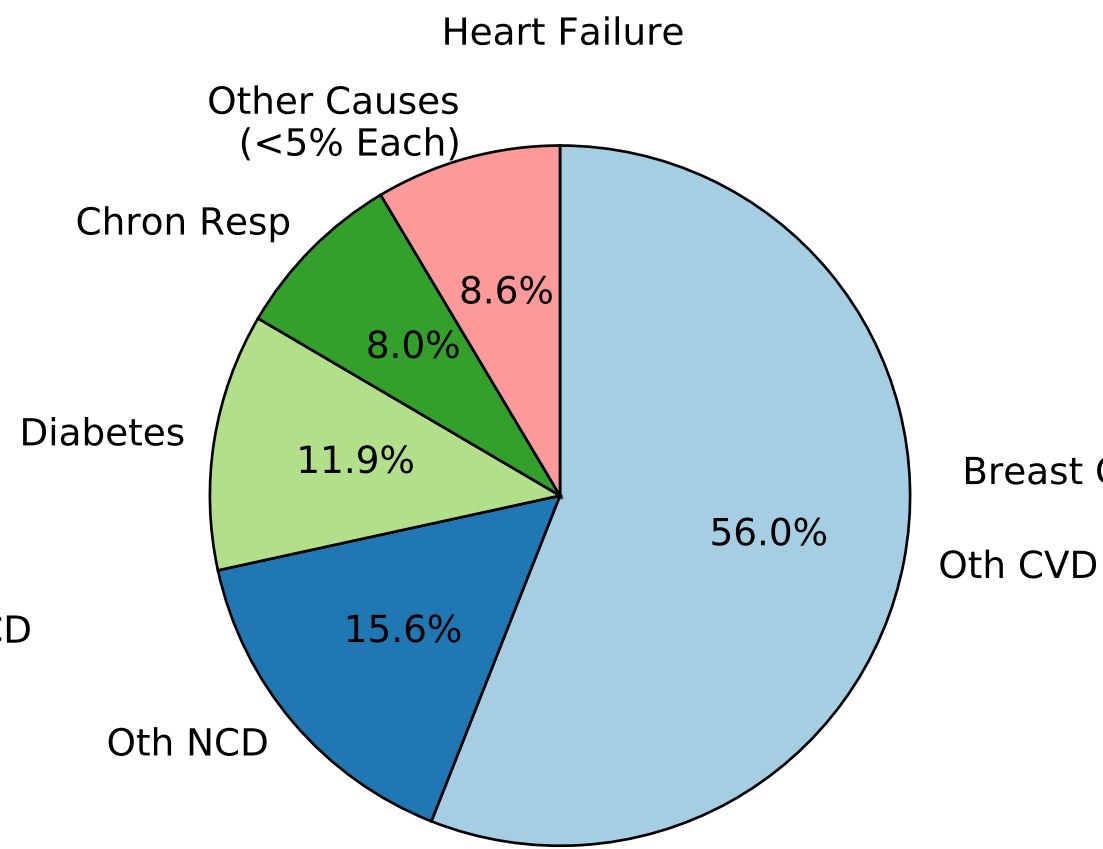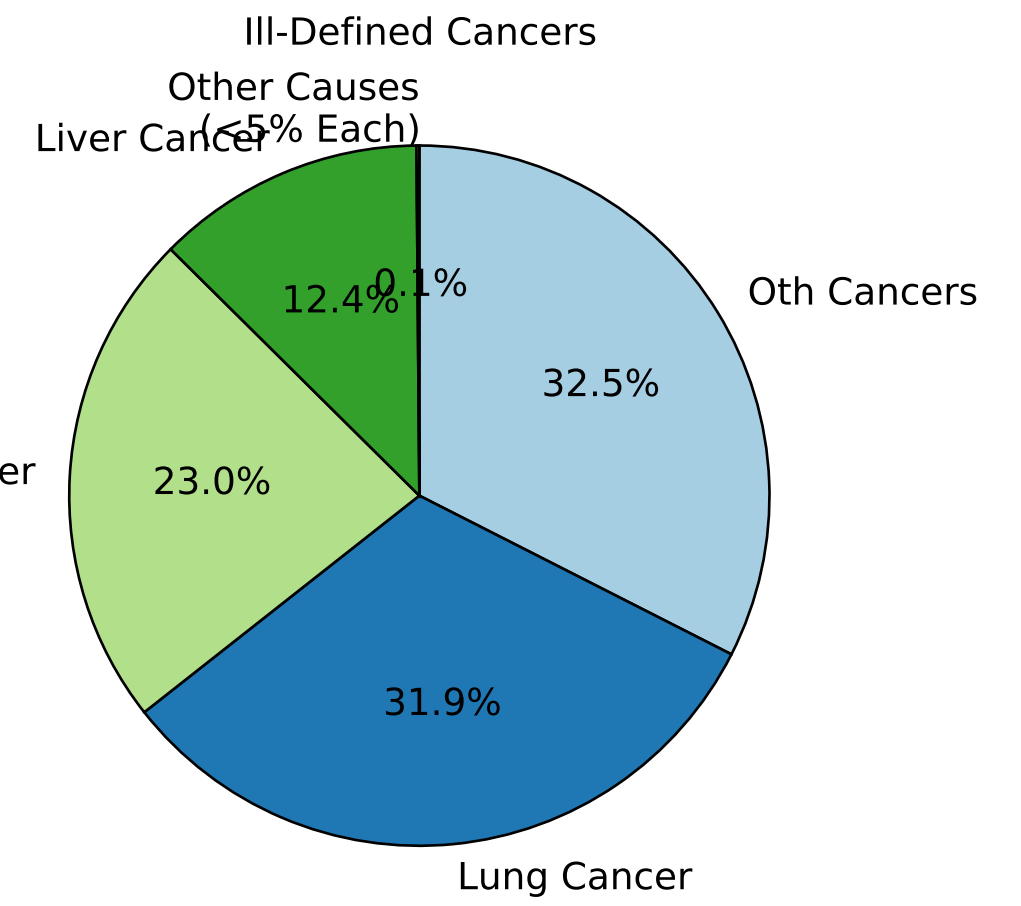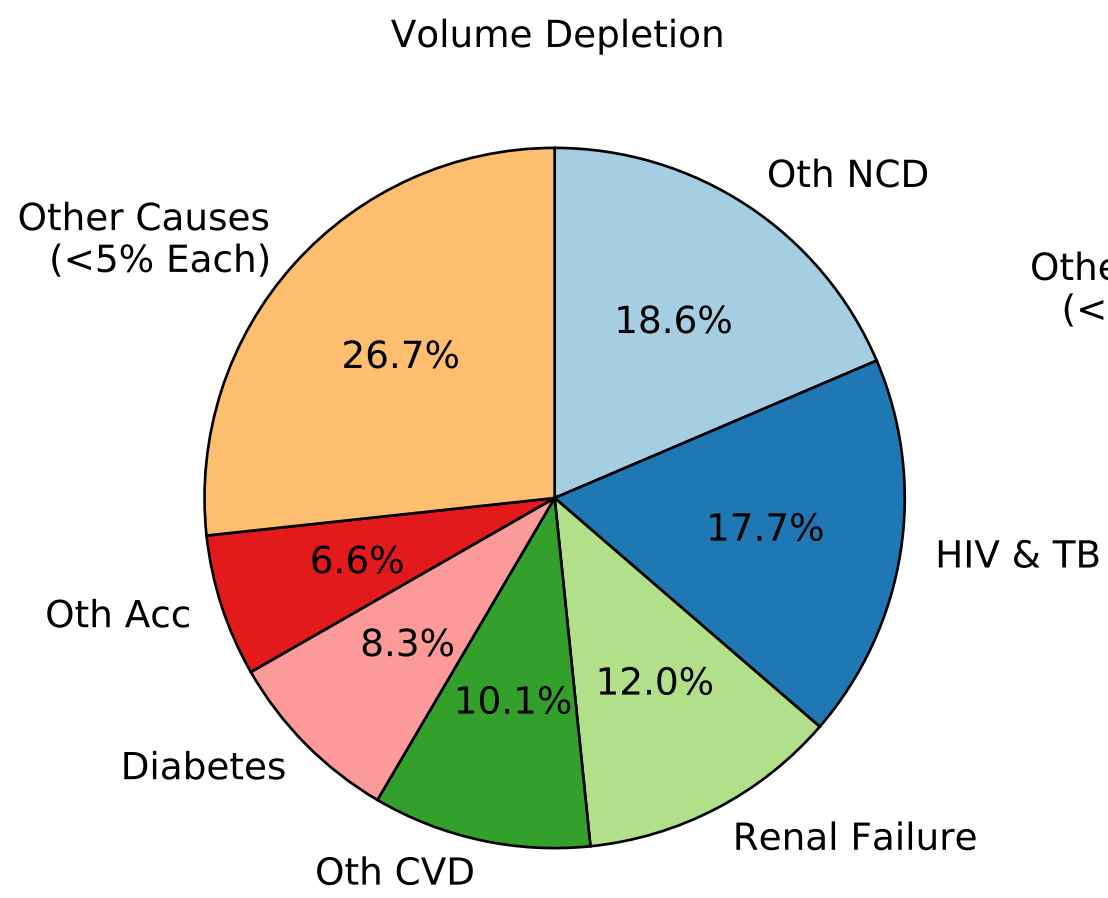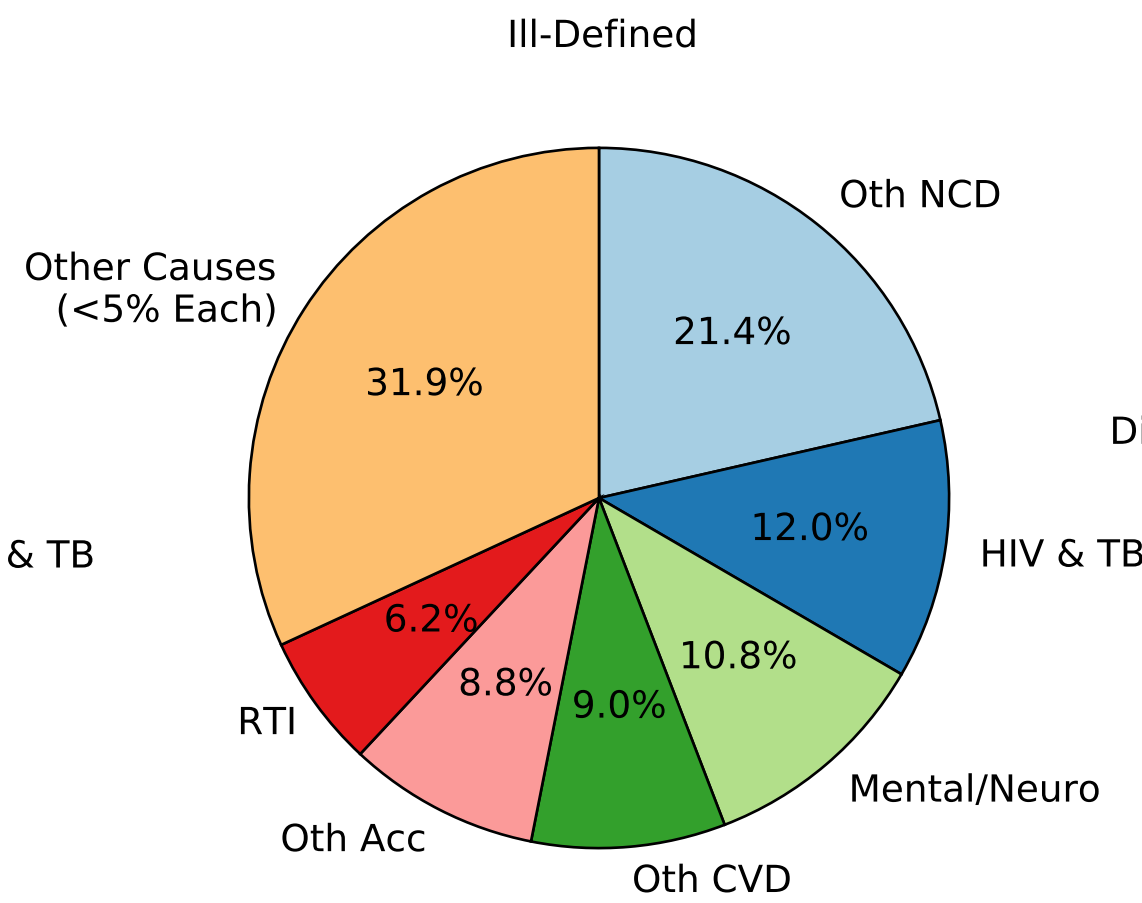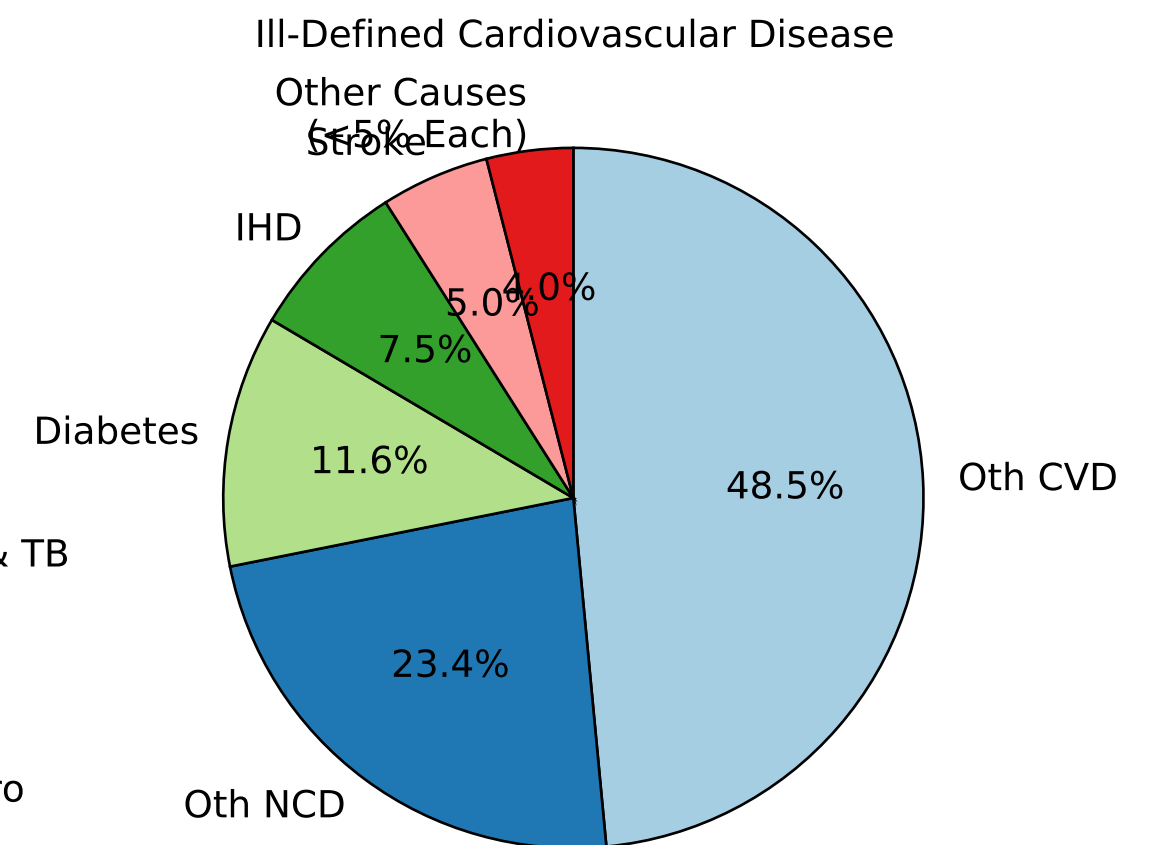

Ill-Defined Injury

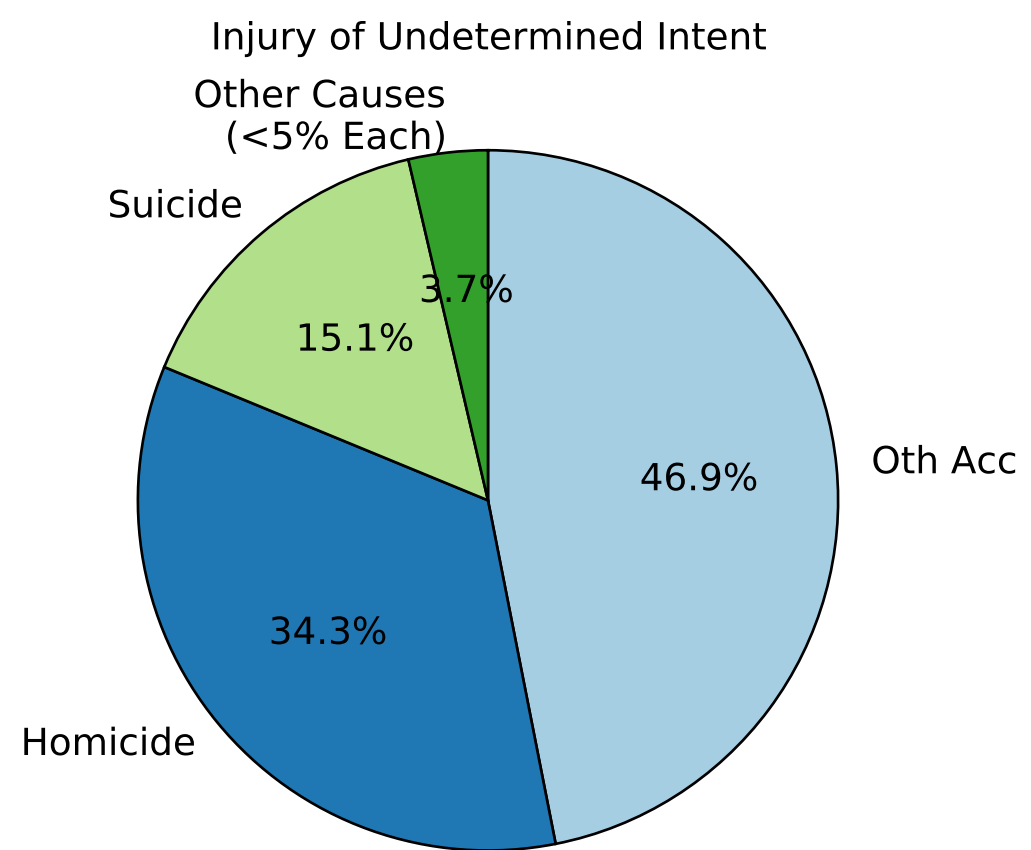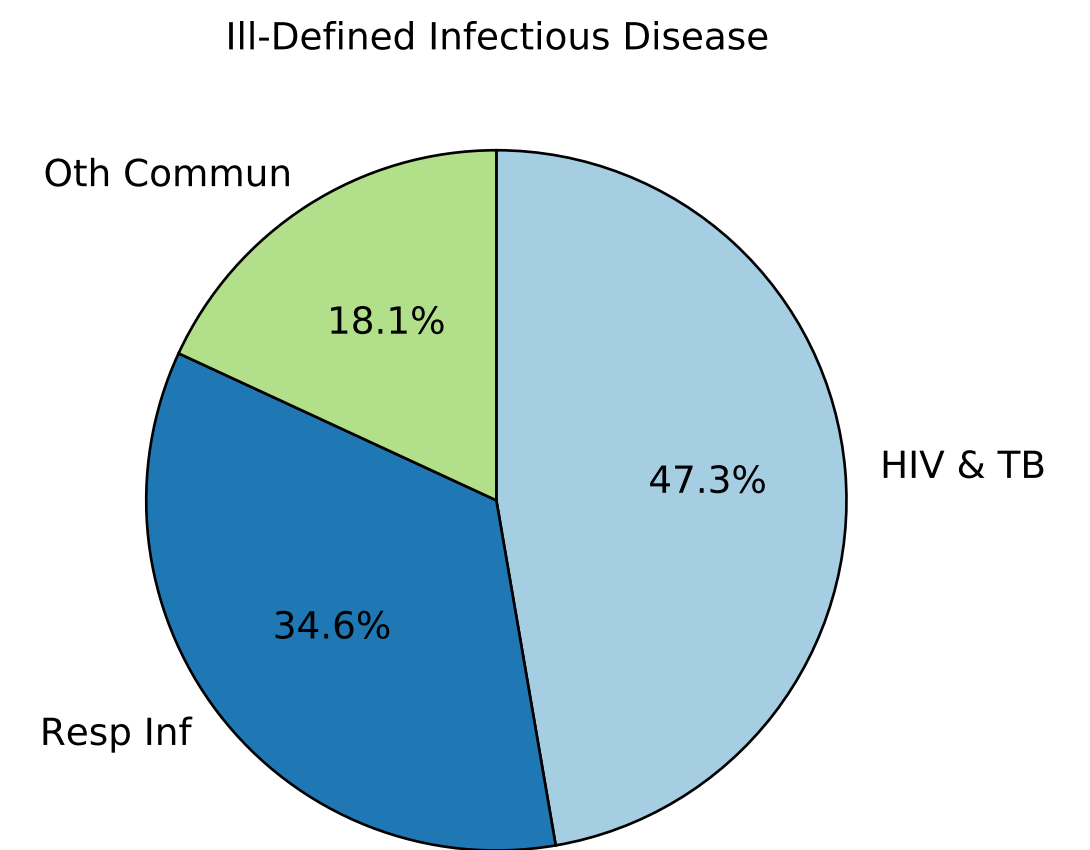

ICD 10  
Female, Age 35

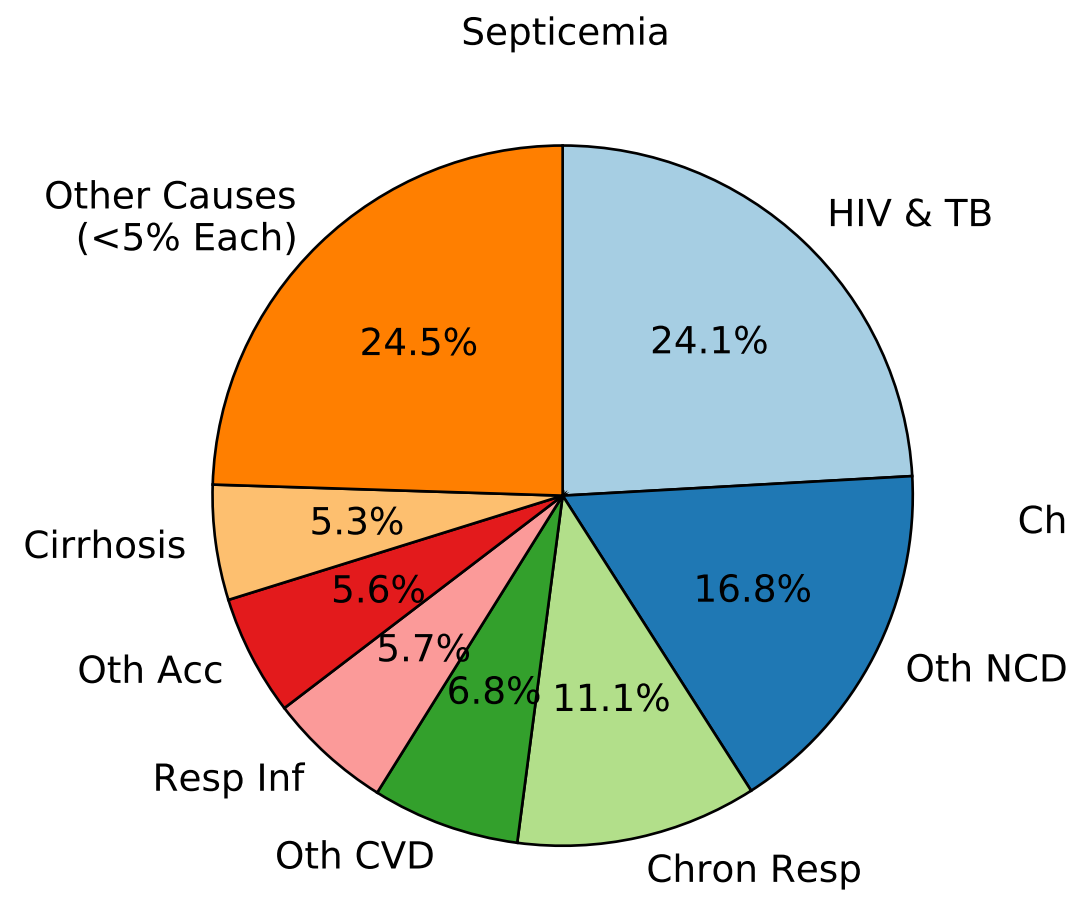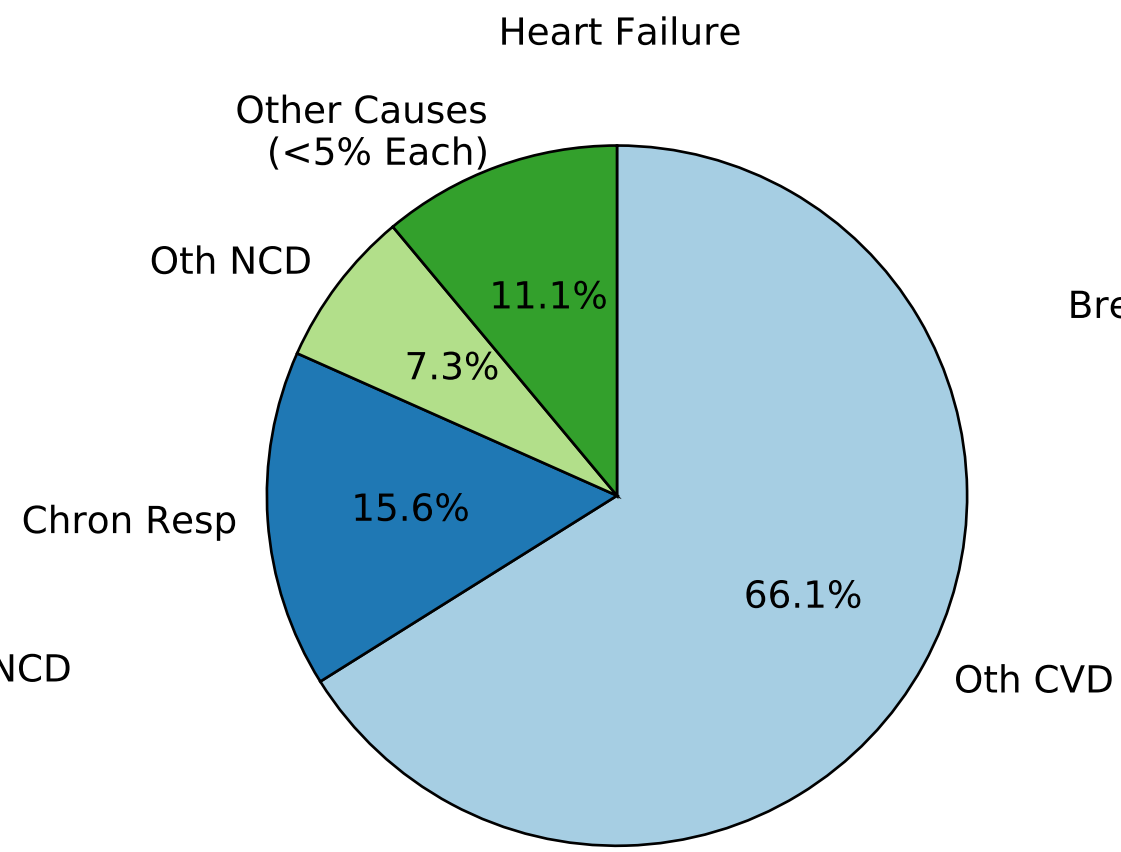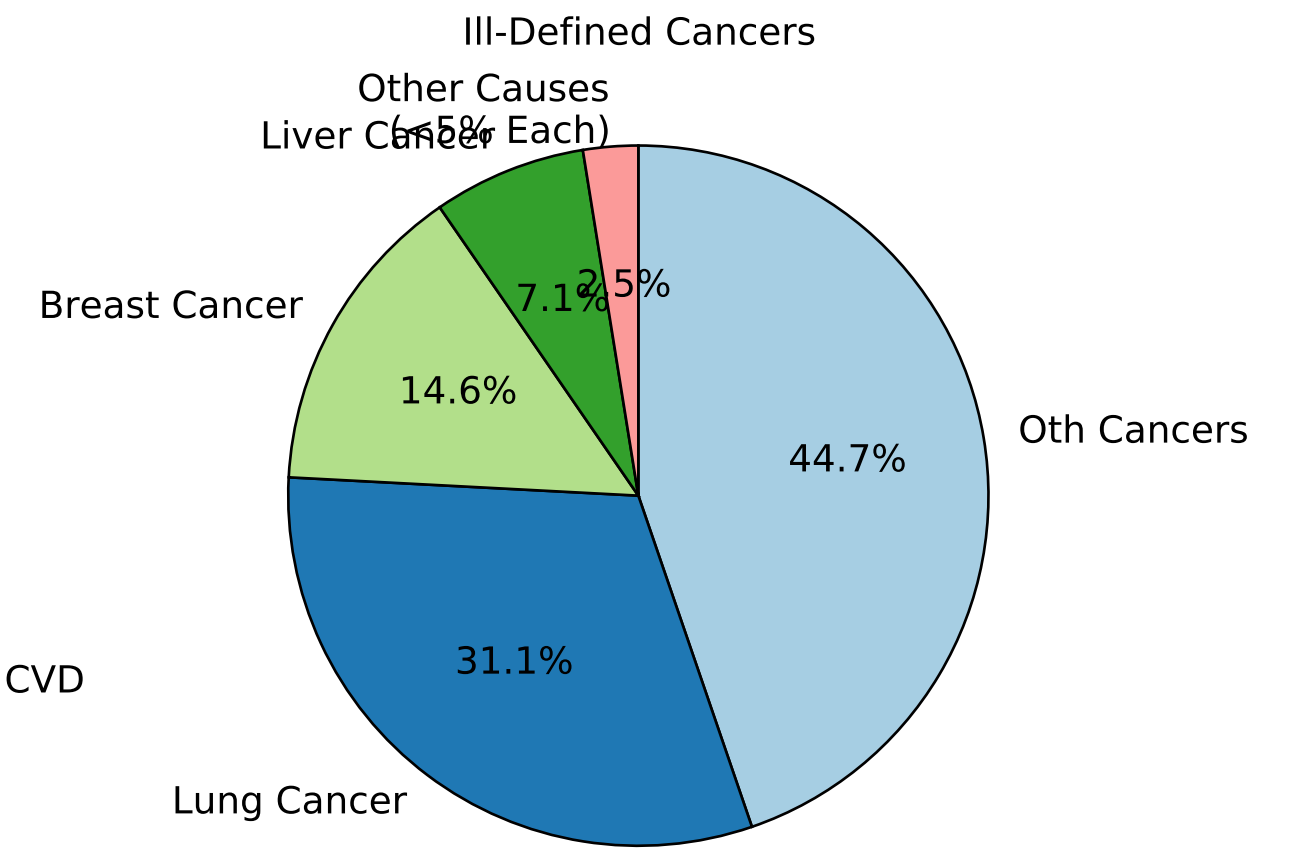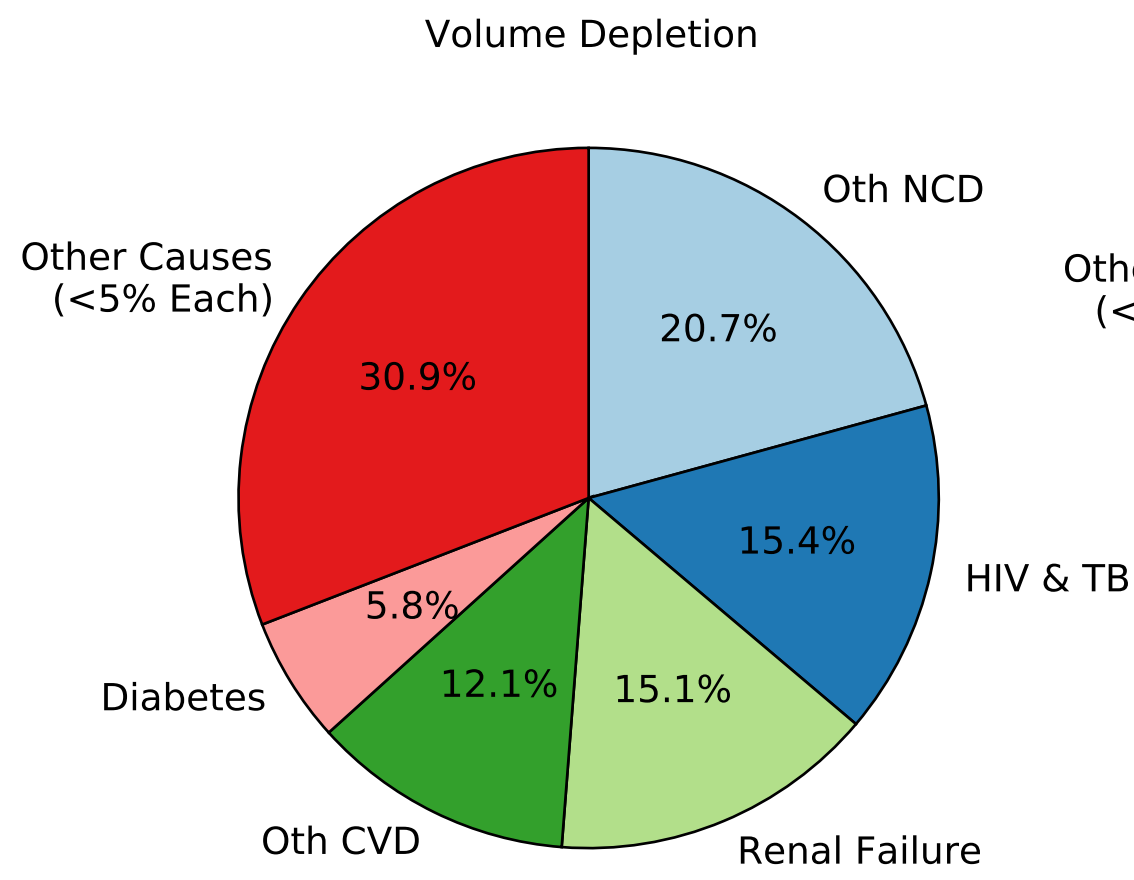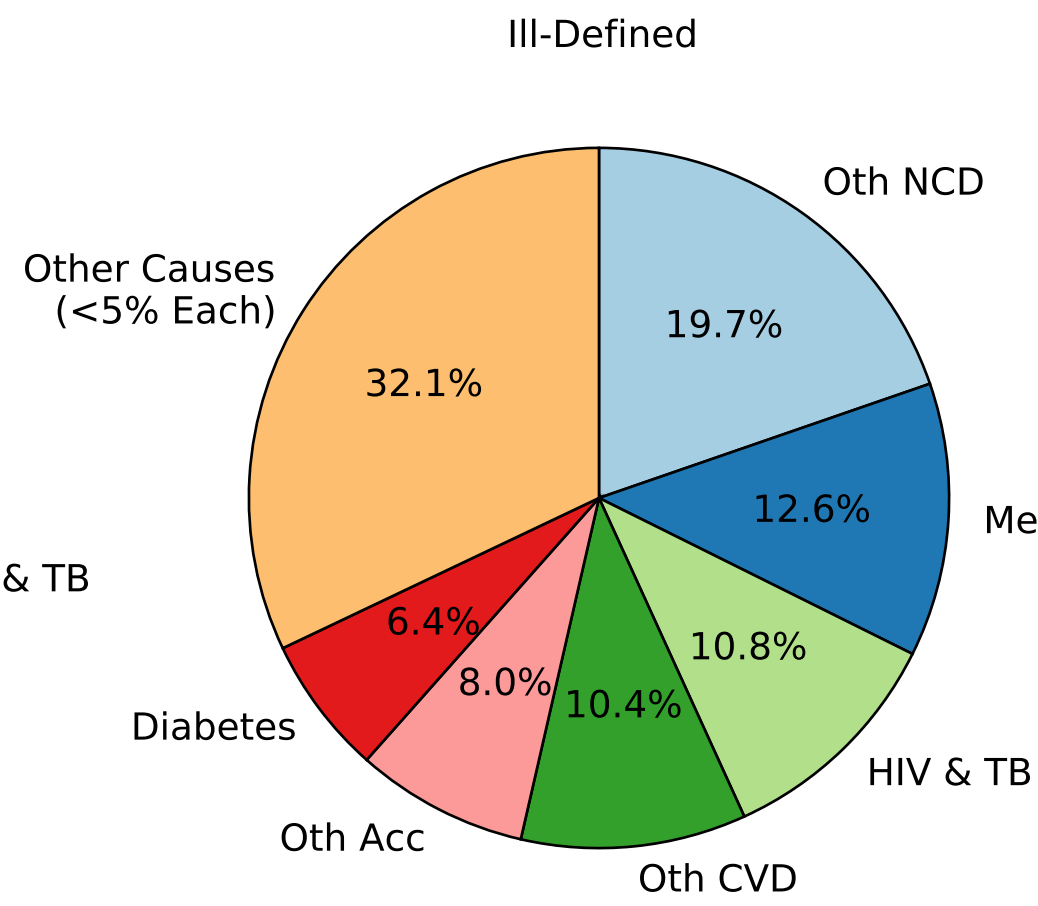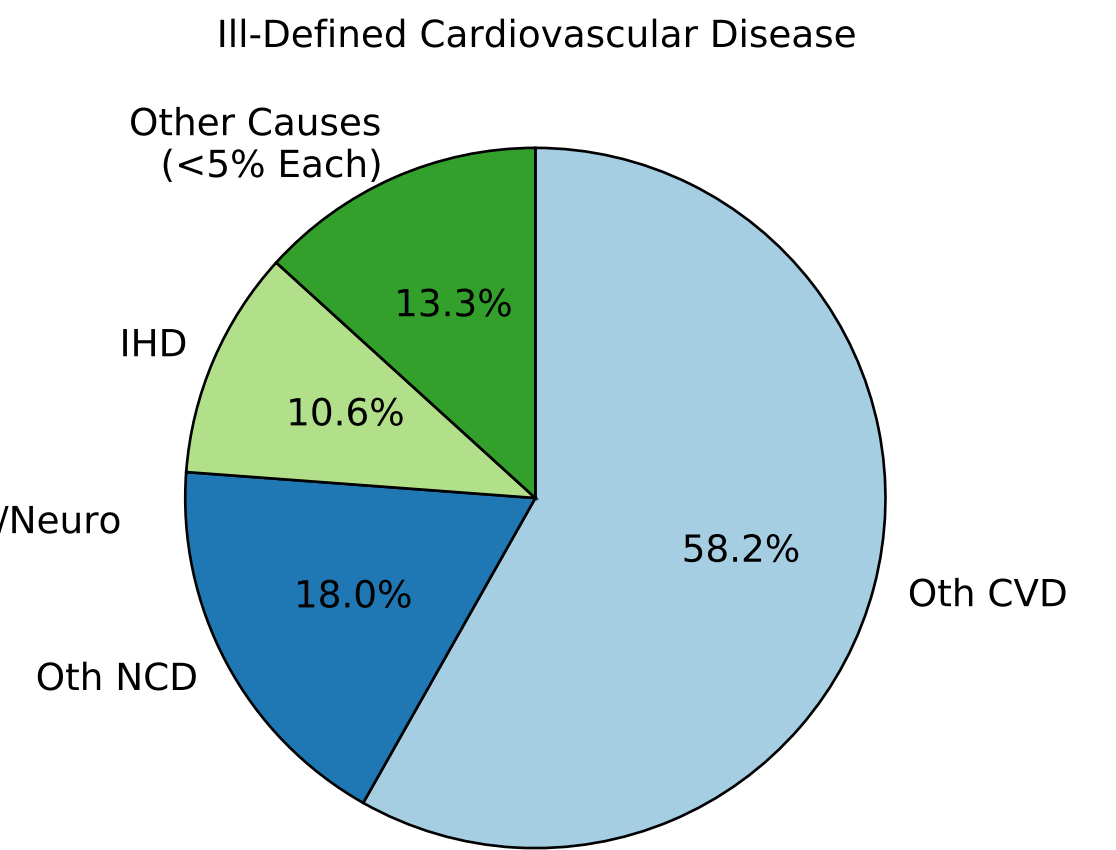

Ill-Defined Injury

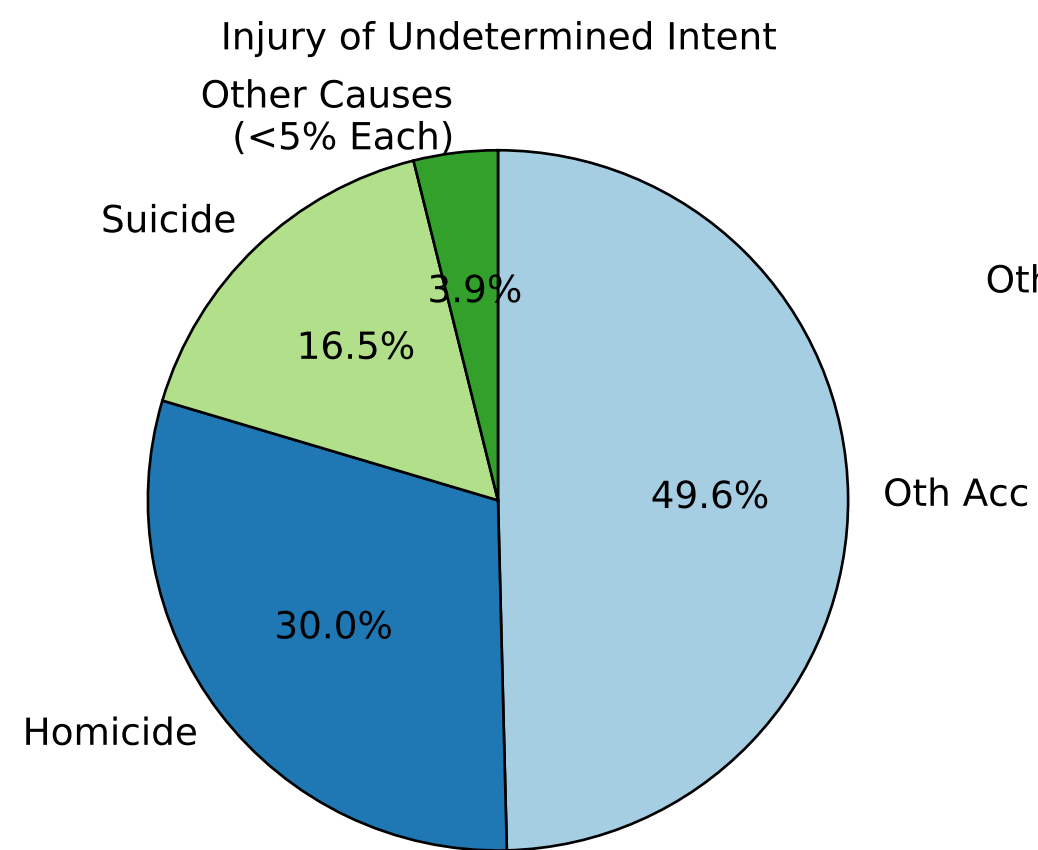

Ill-Defined Infectious Disease

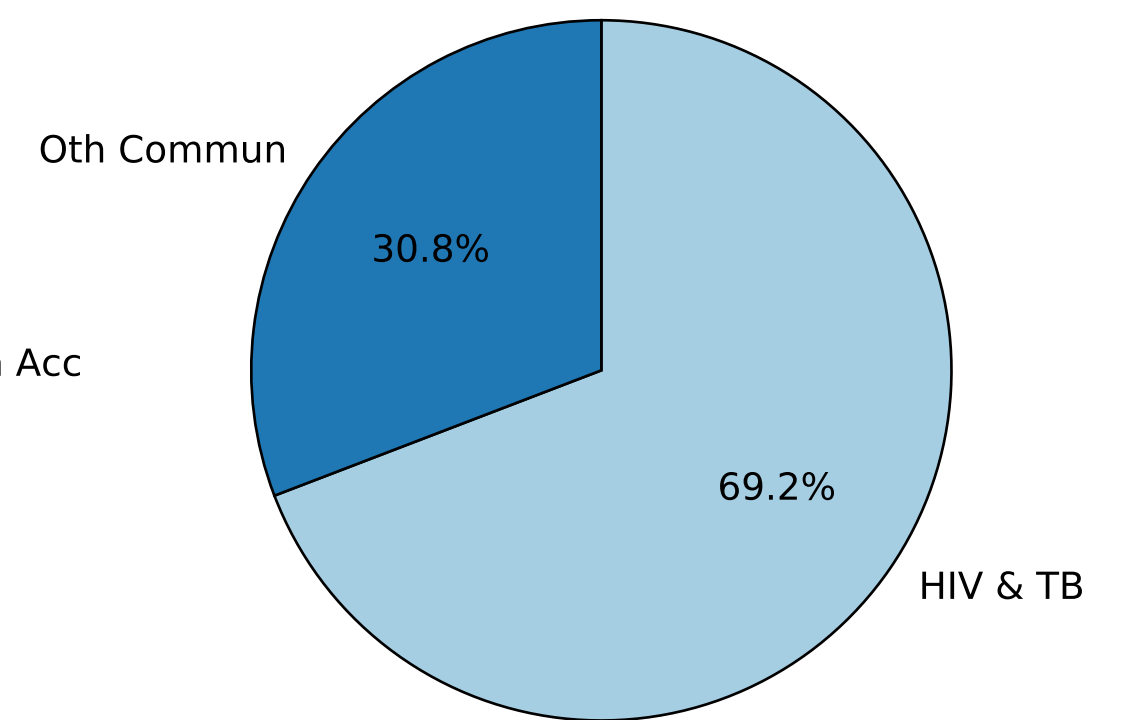

ICD 10  
Female, Age 40

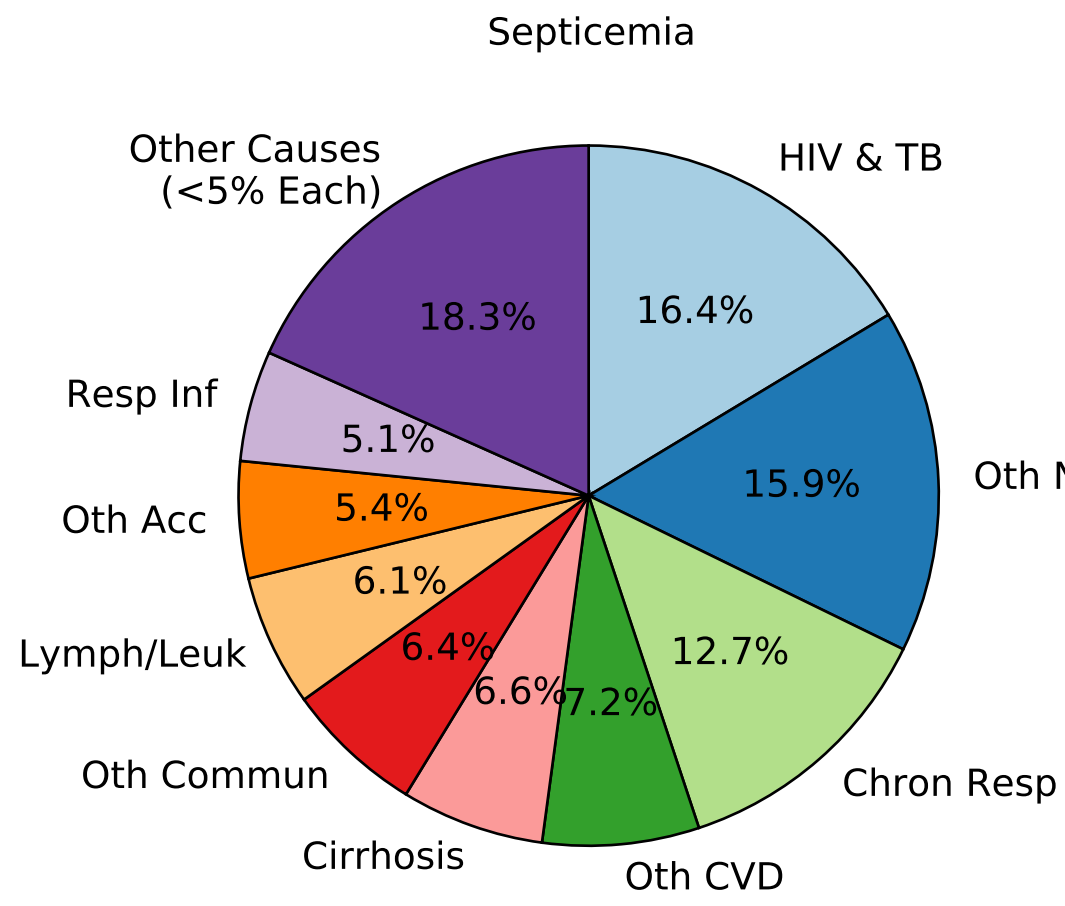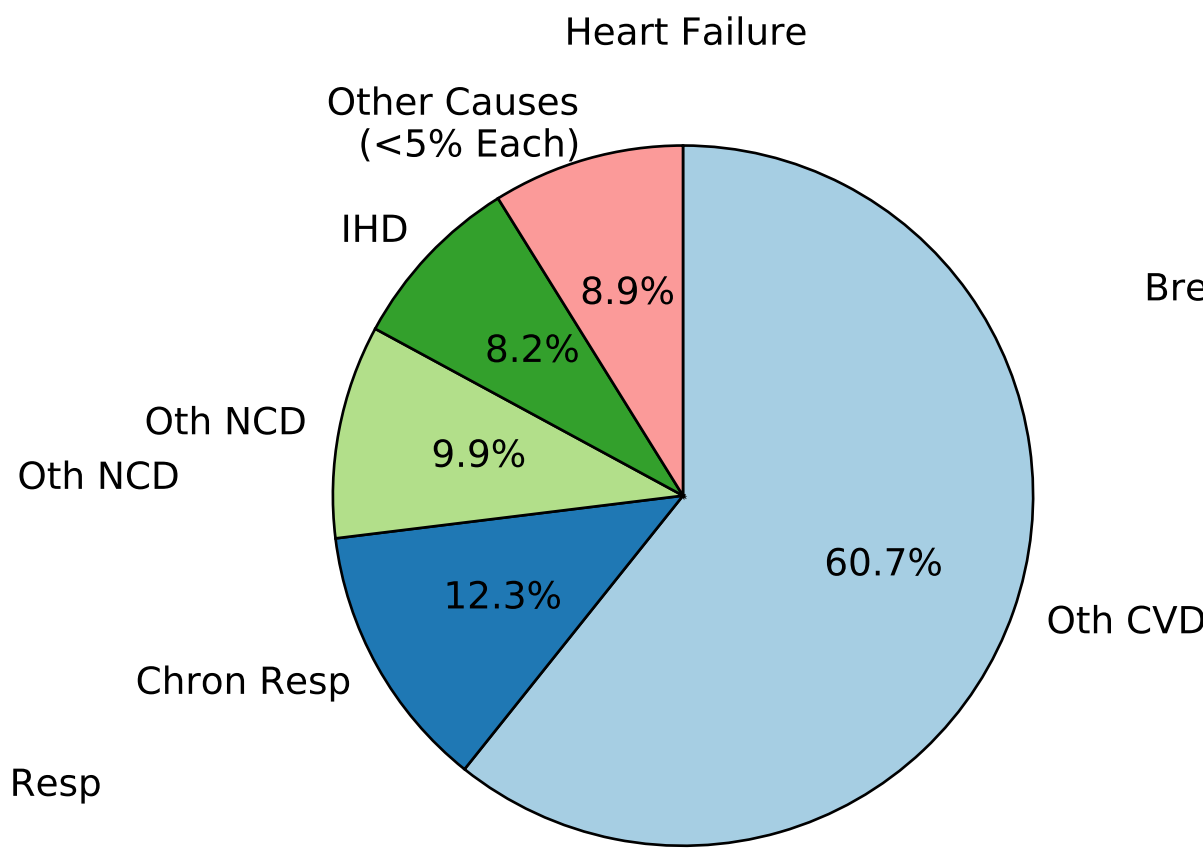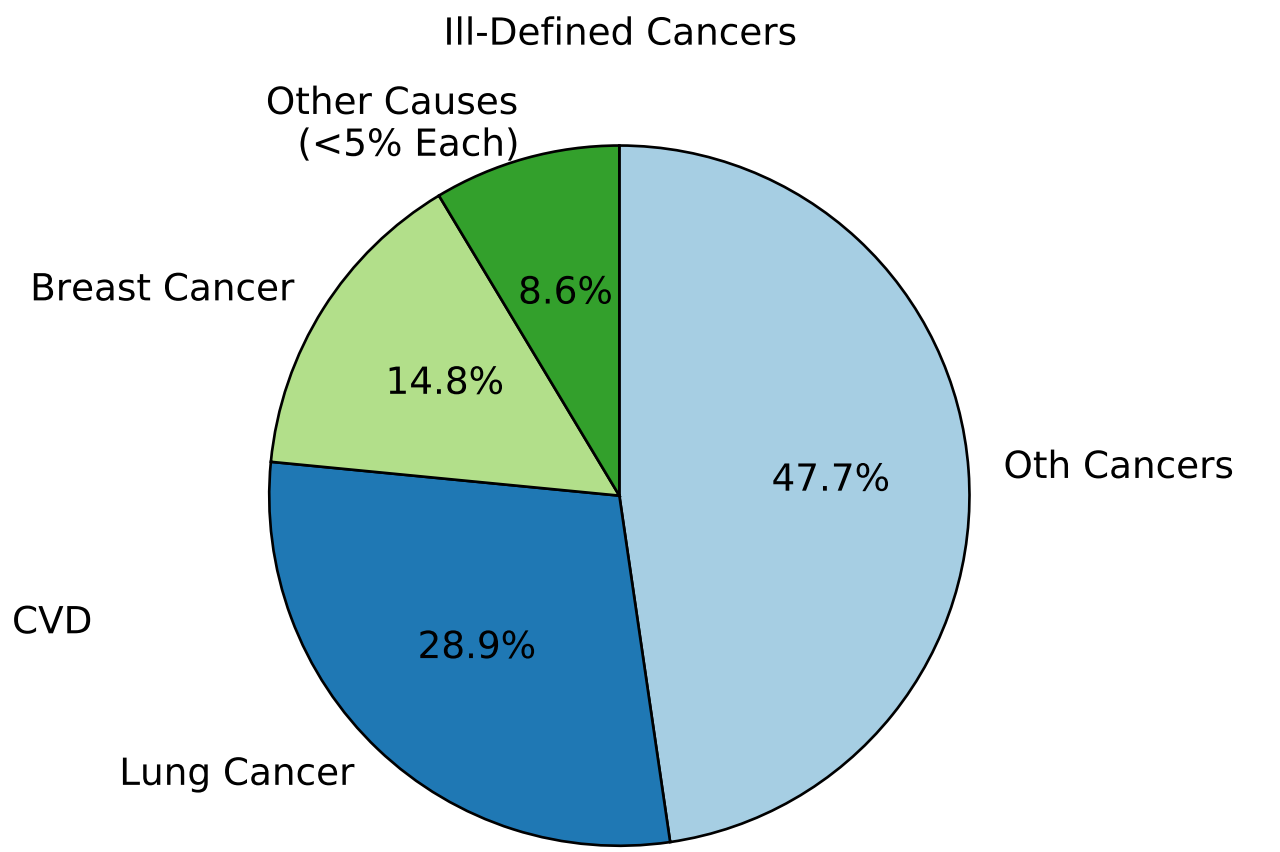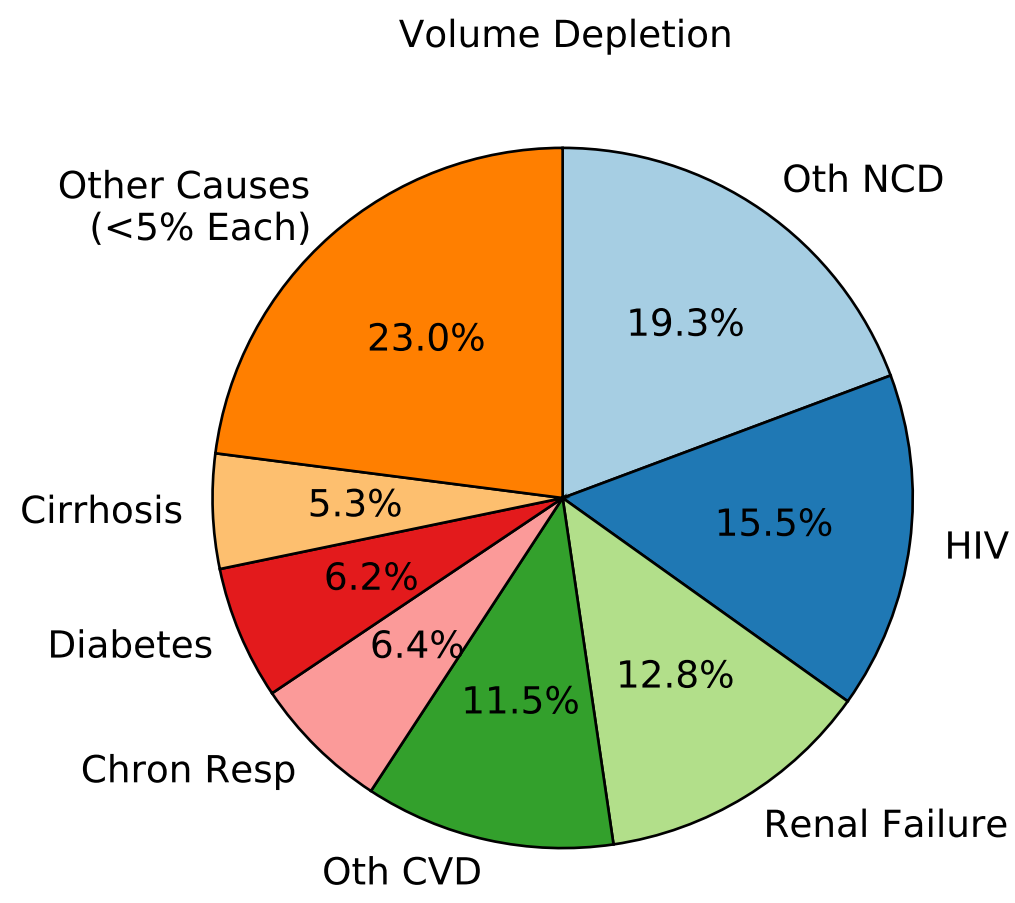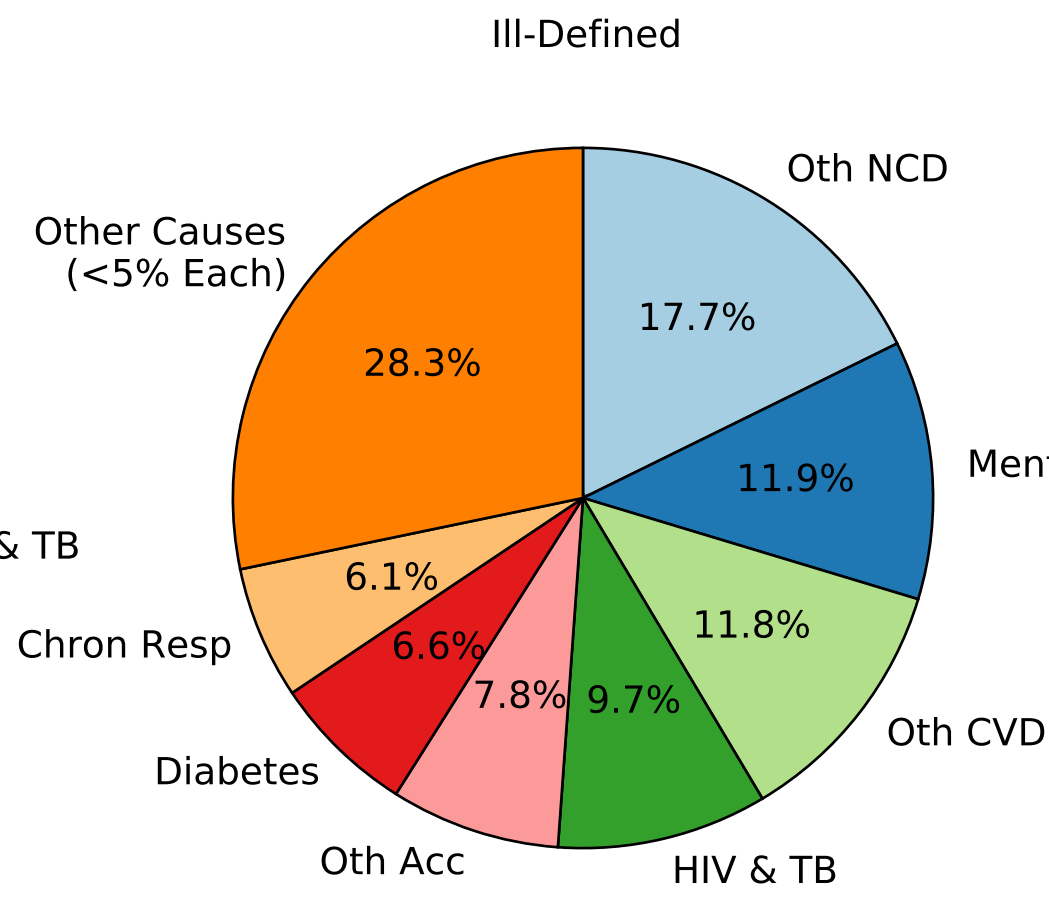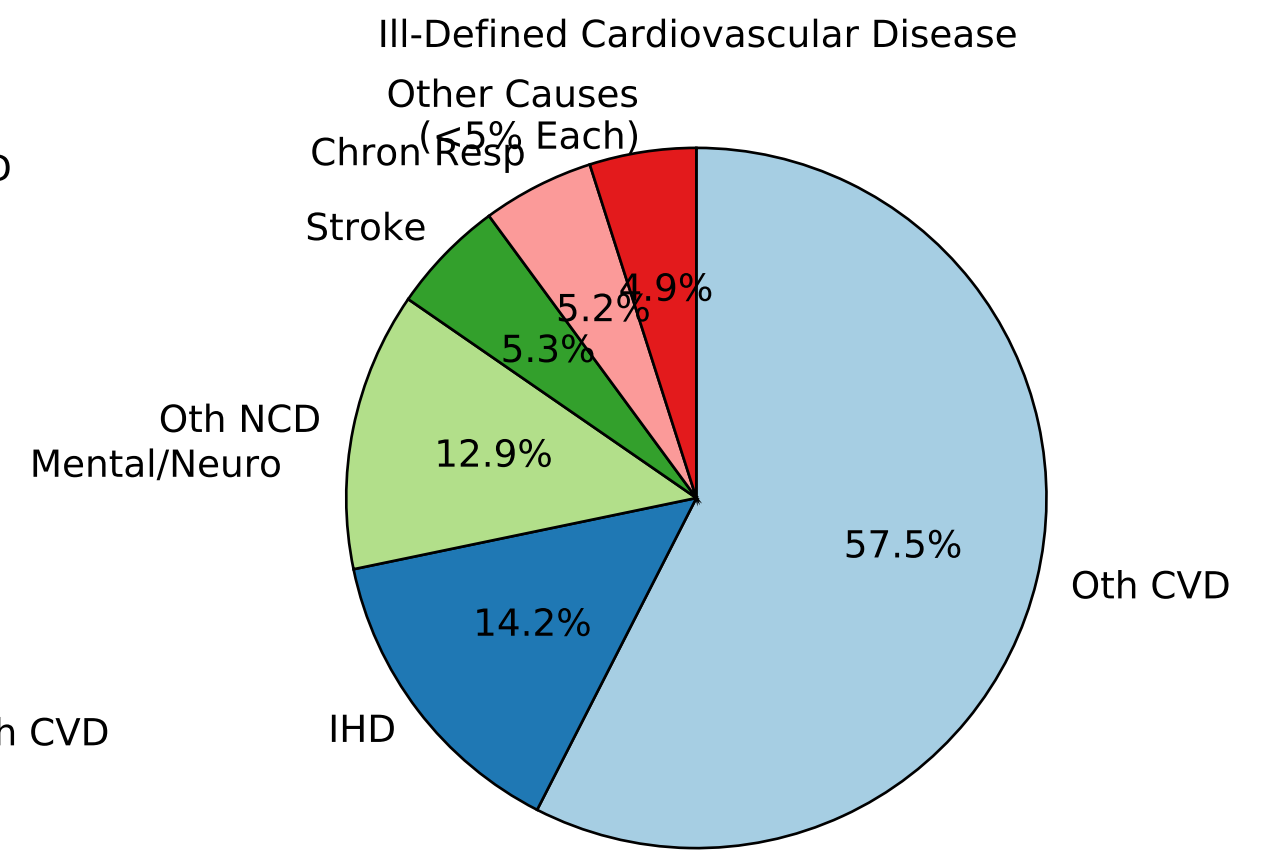

Ill-Defined Injury

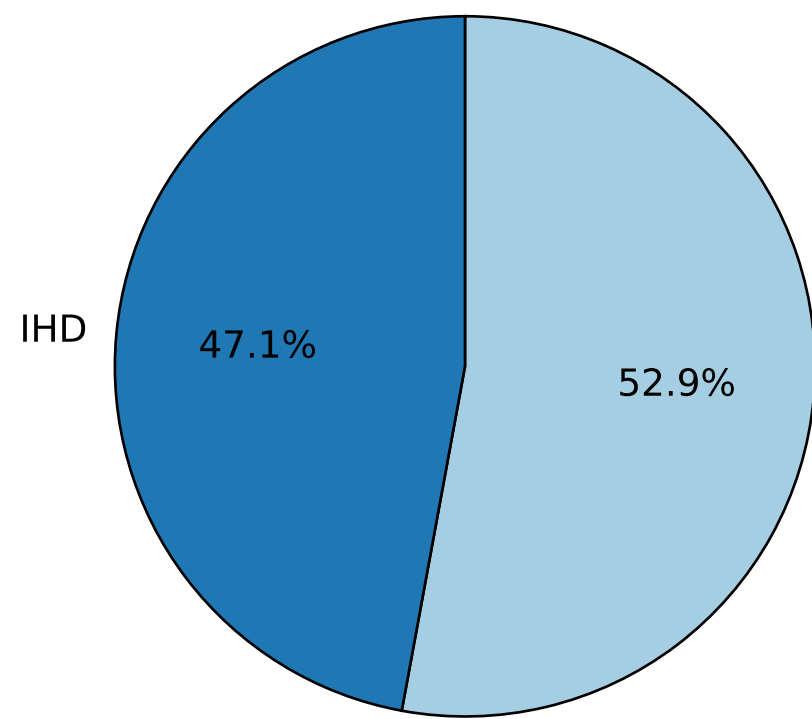

Injury of Undetermined Intent

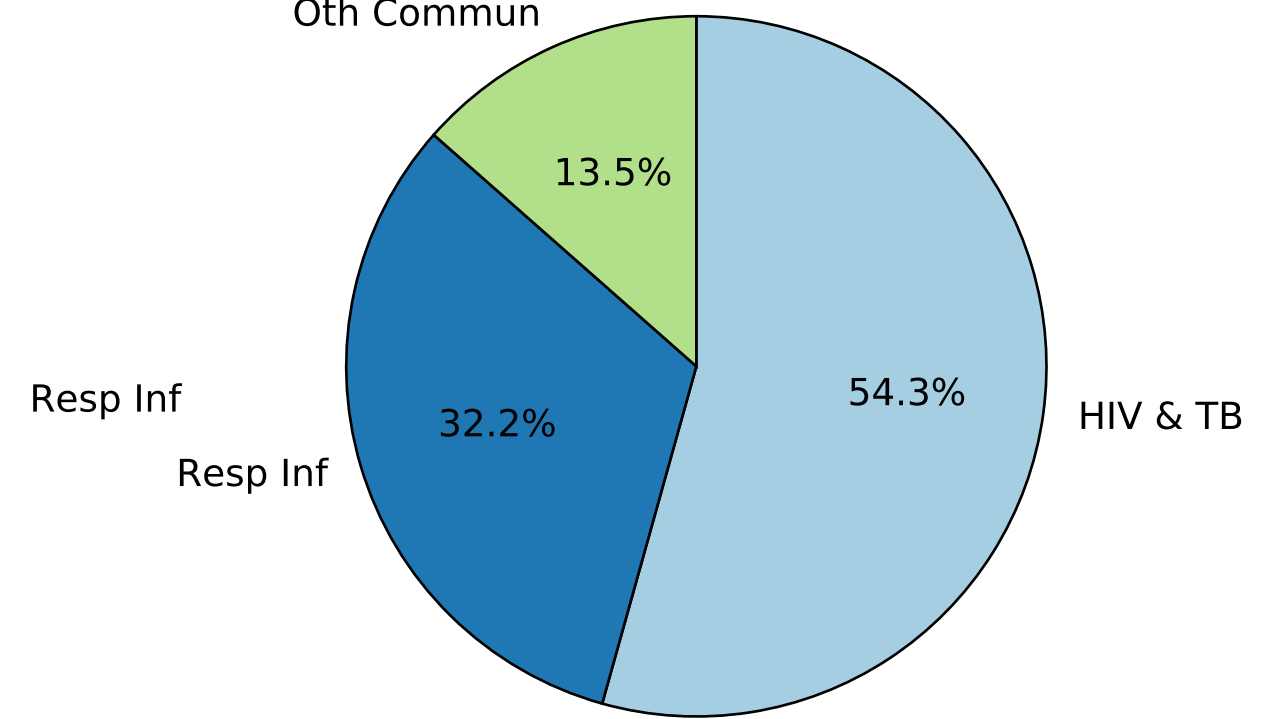

ICD 10  
Female, Age 45

Septicemia

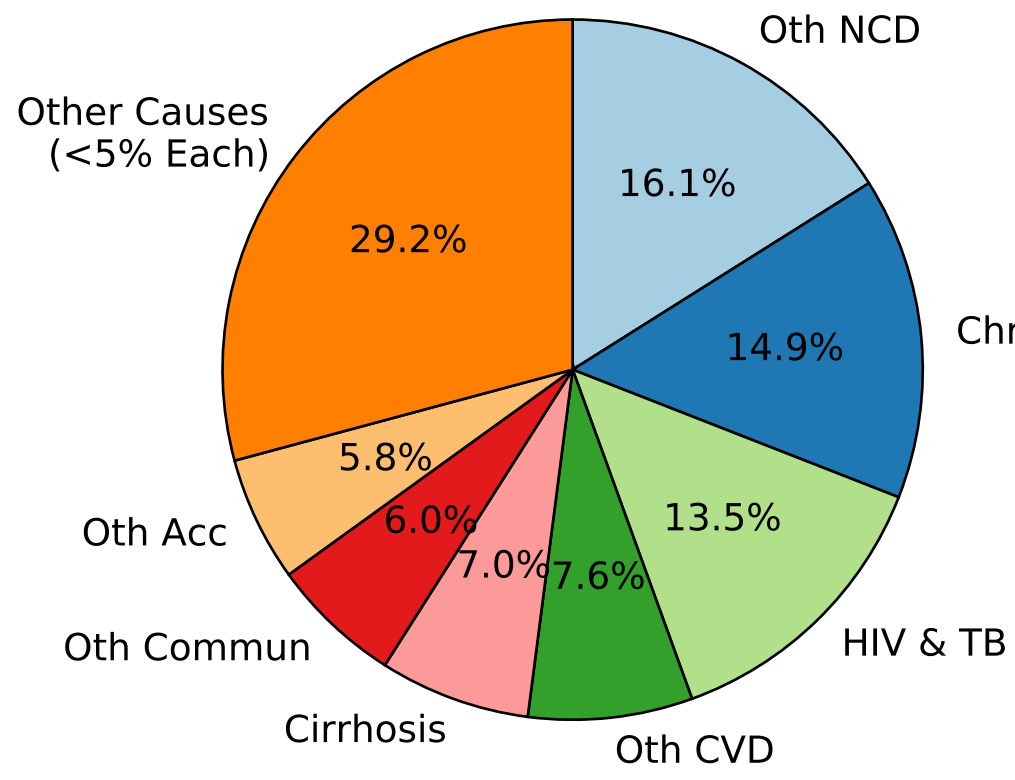

Heart Failure

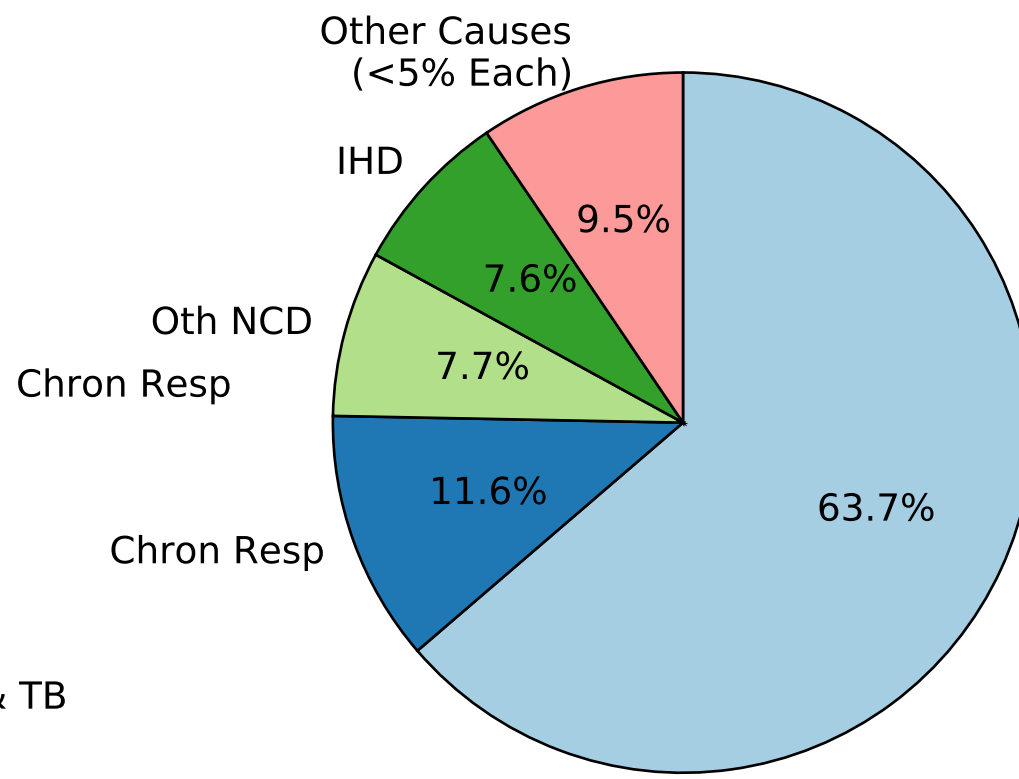

Ill-Defined Cancers

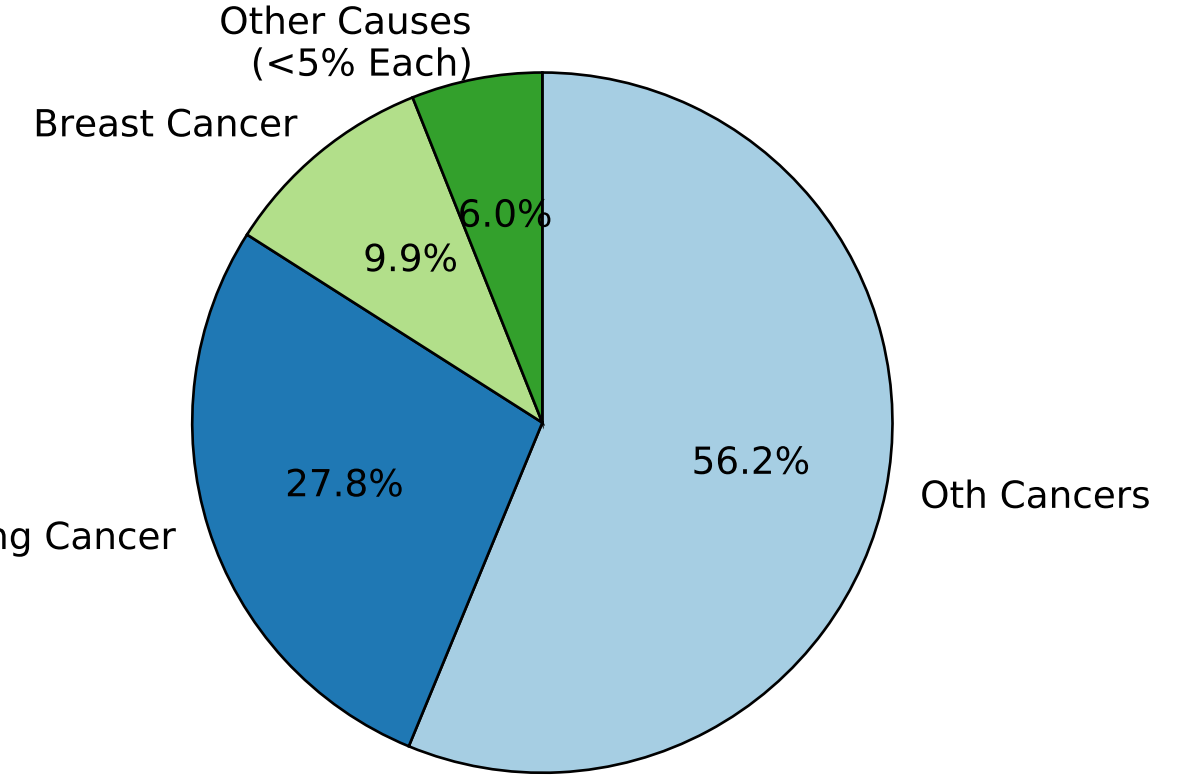

Volume Depletion

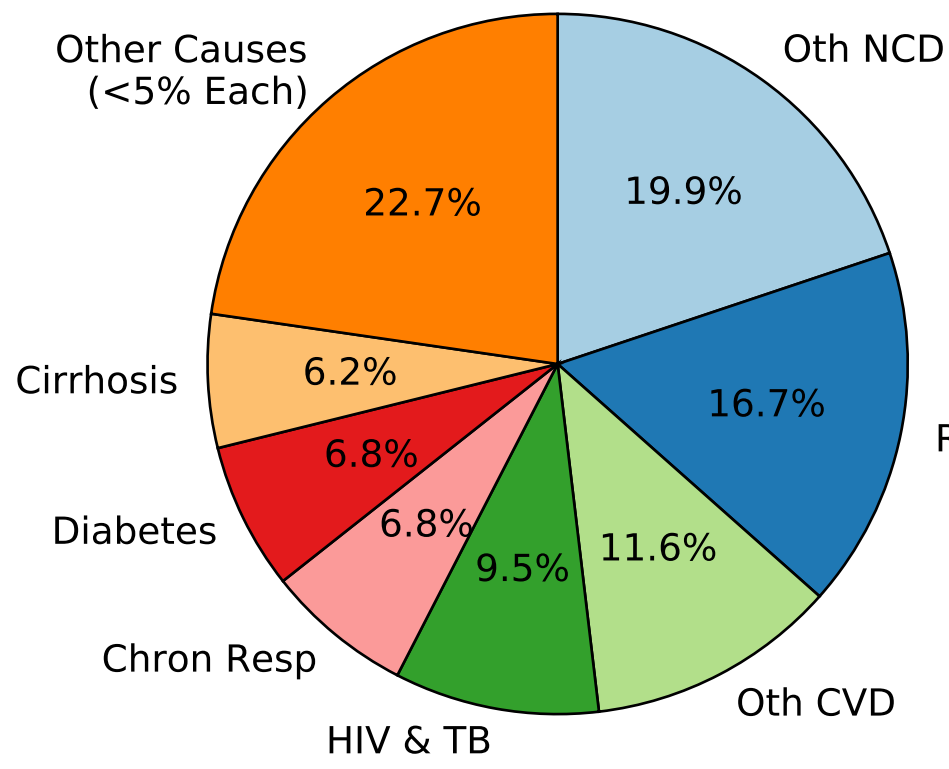

Ill-Defined

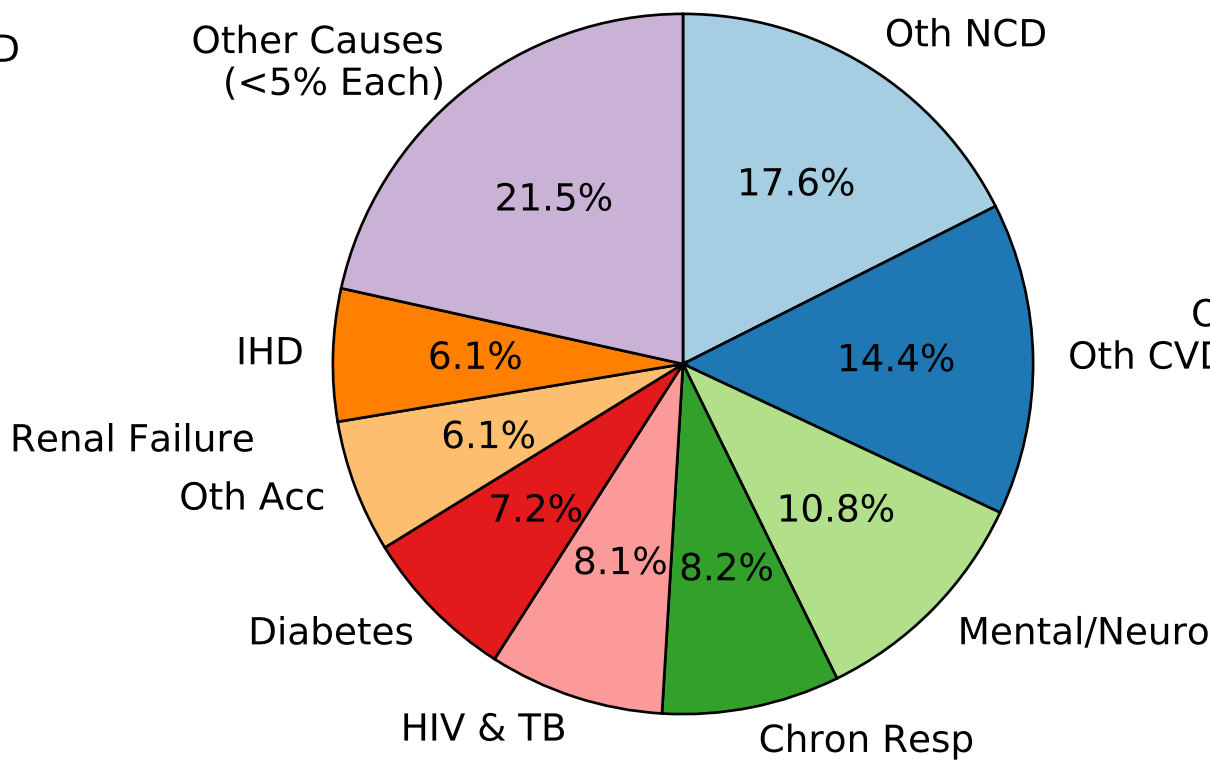

Ill-Defined Cardiovascular Disease

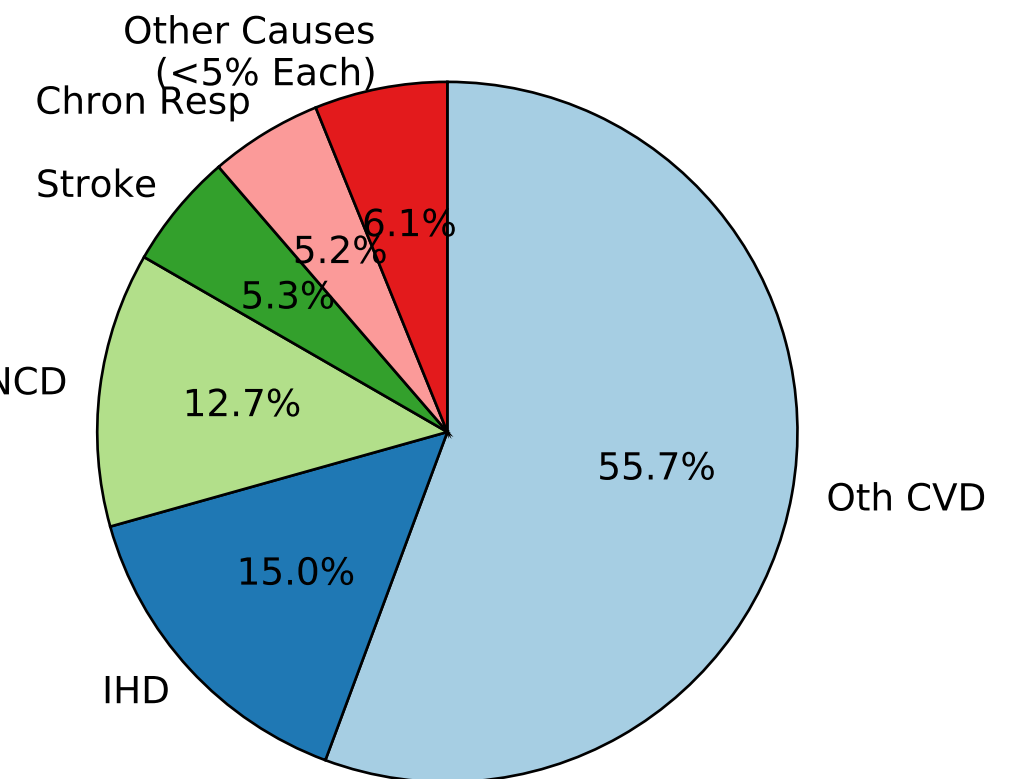

Ill-Defined Injury

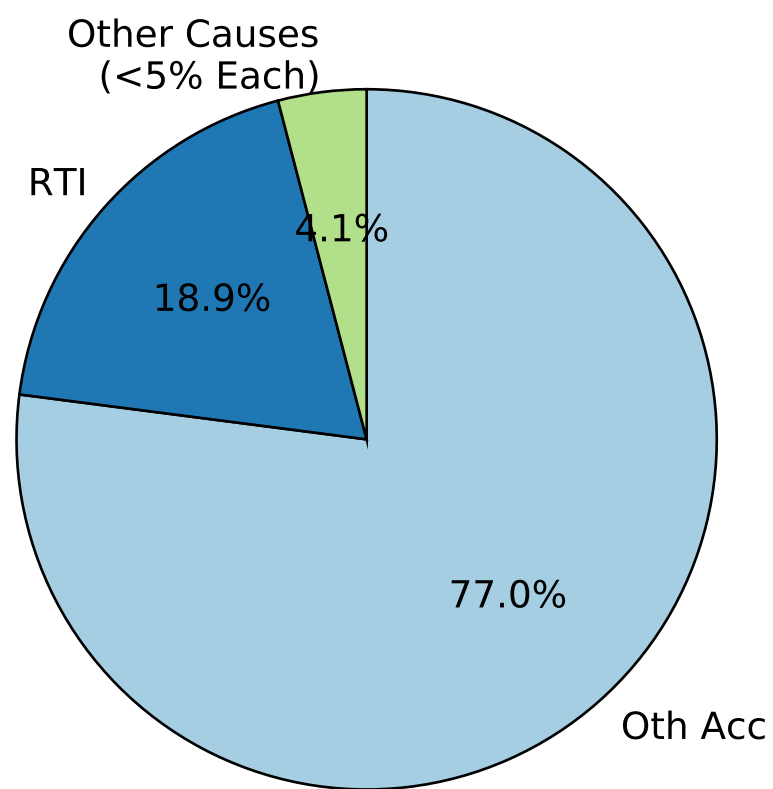

Injury of Undetermined Intent

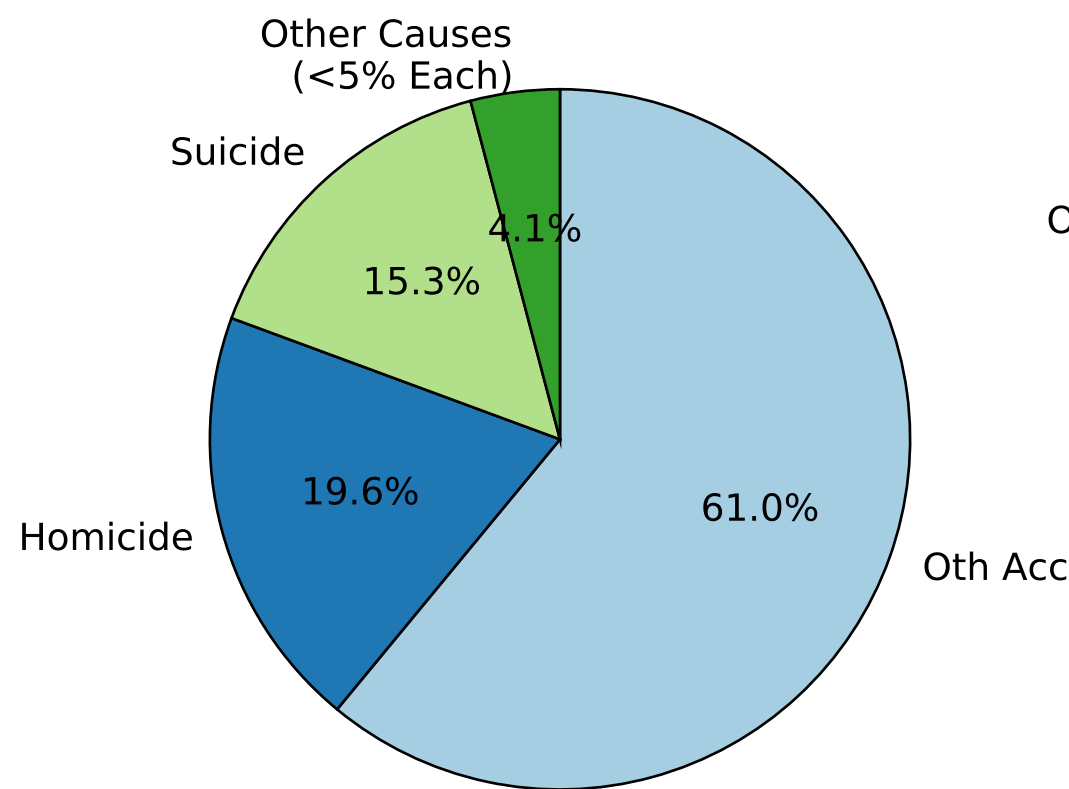

Ill-Defined Infectious Disease

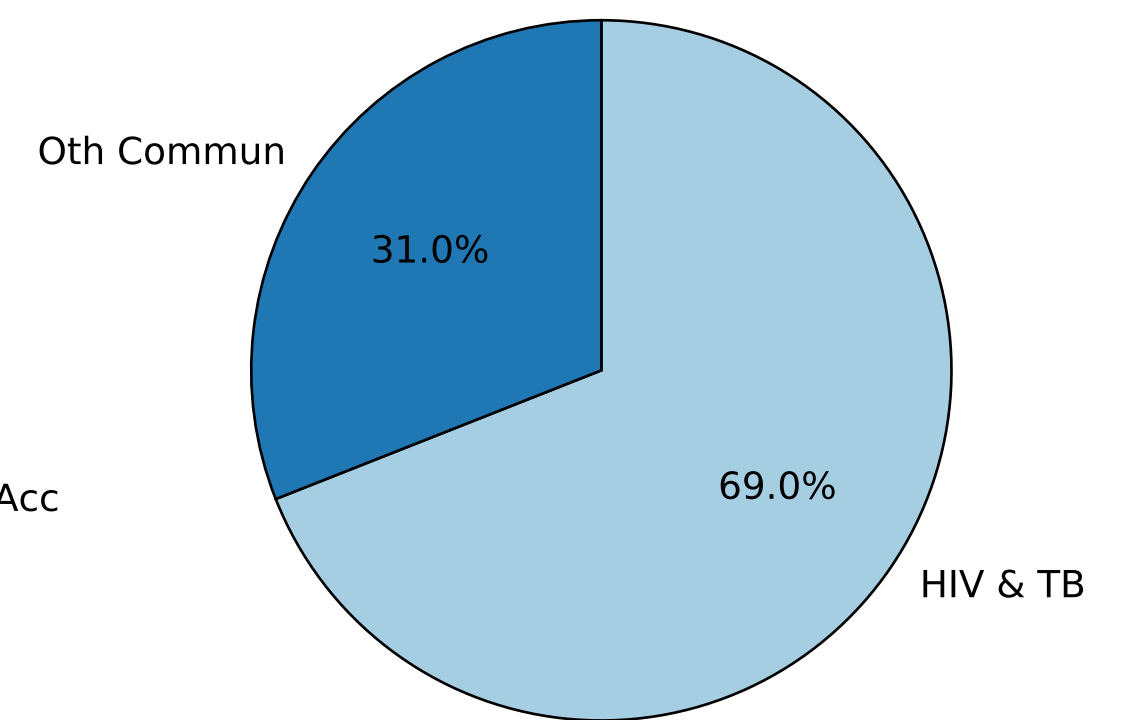

ICD 10  
Female, Age 50

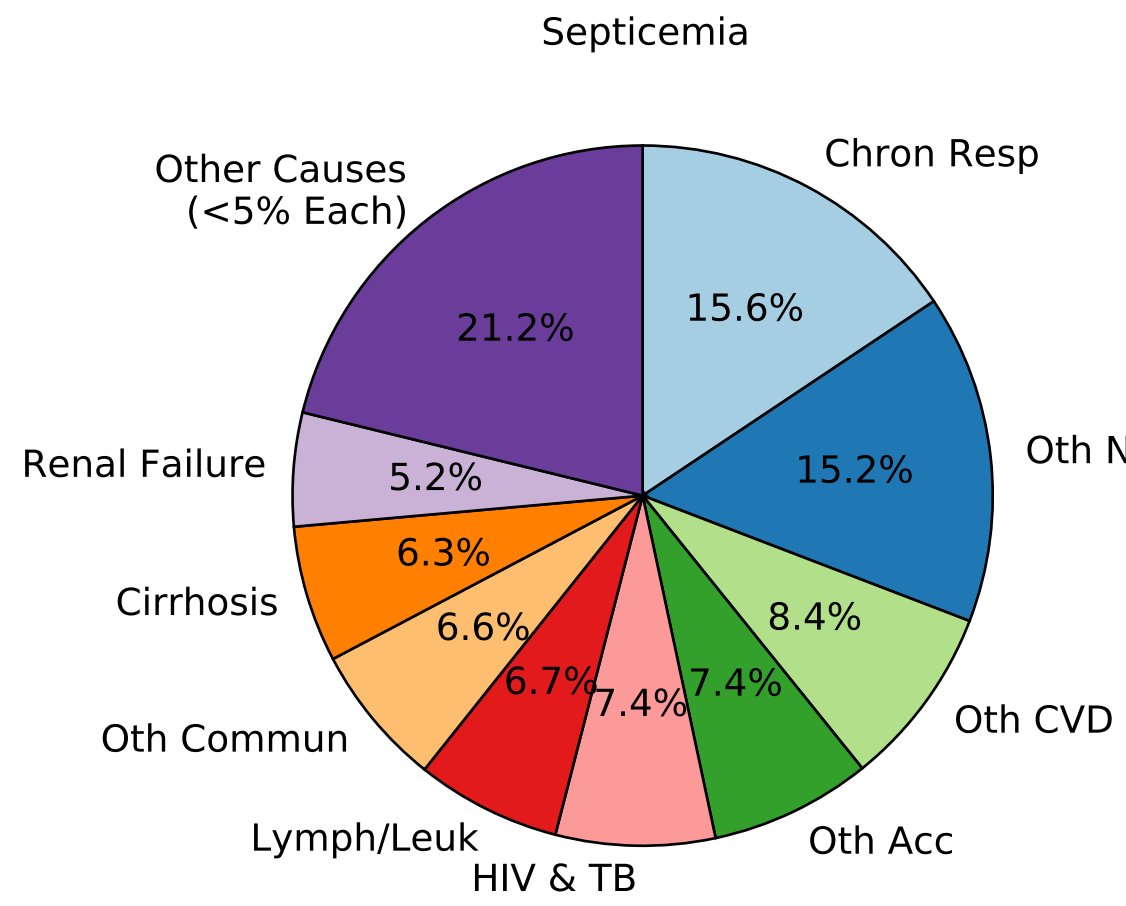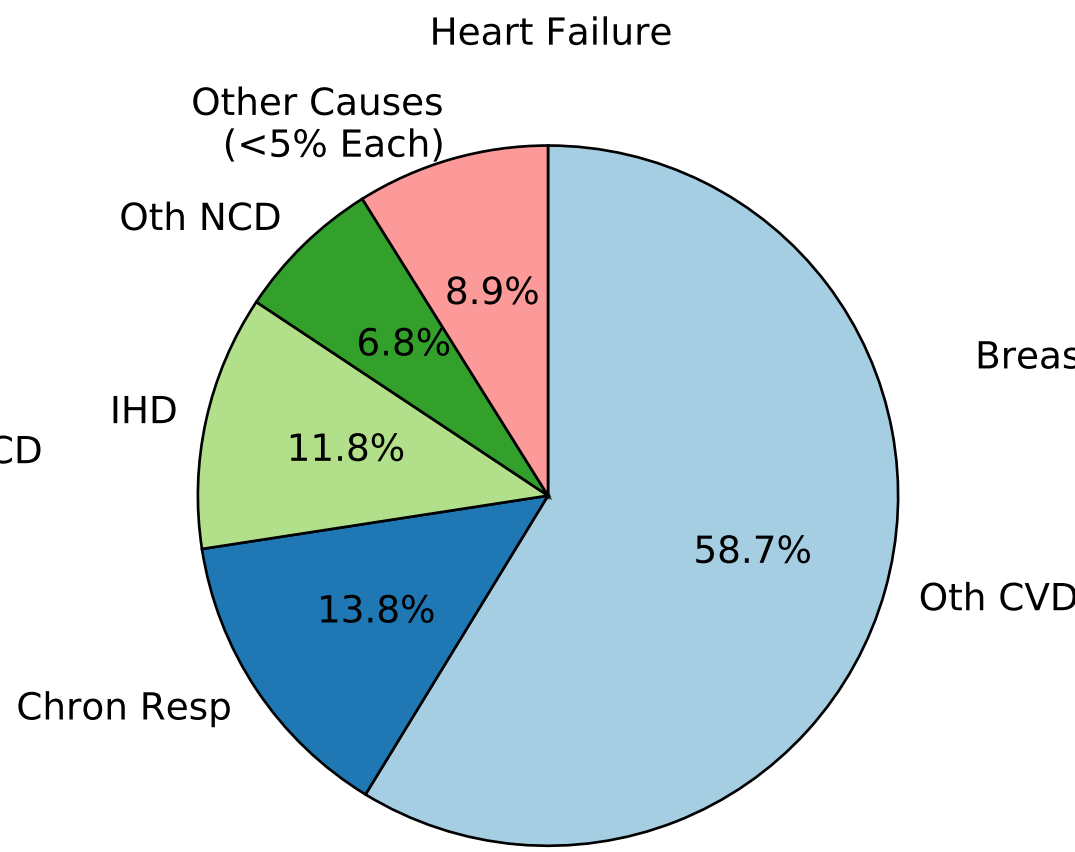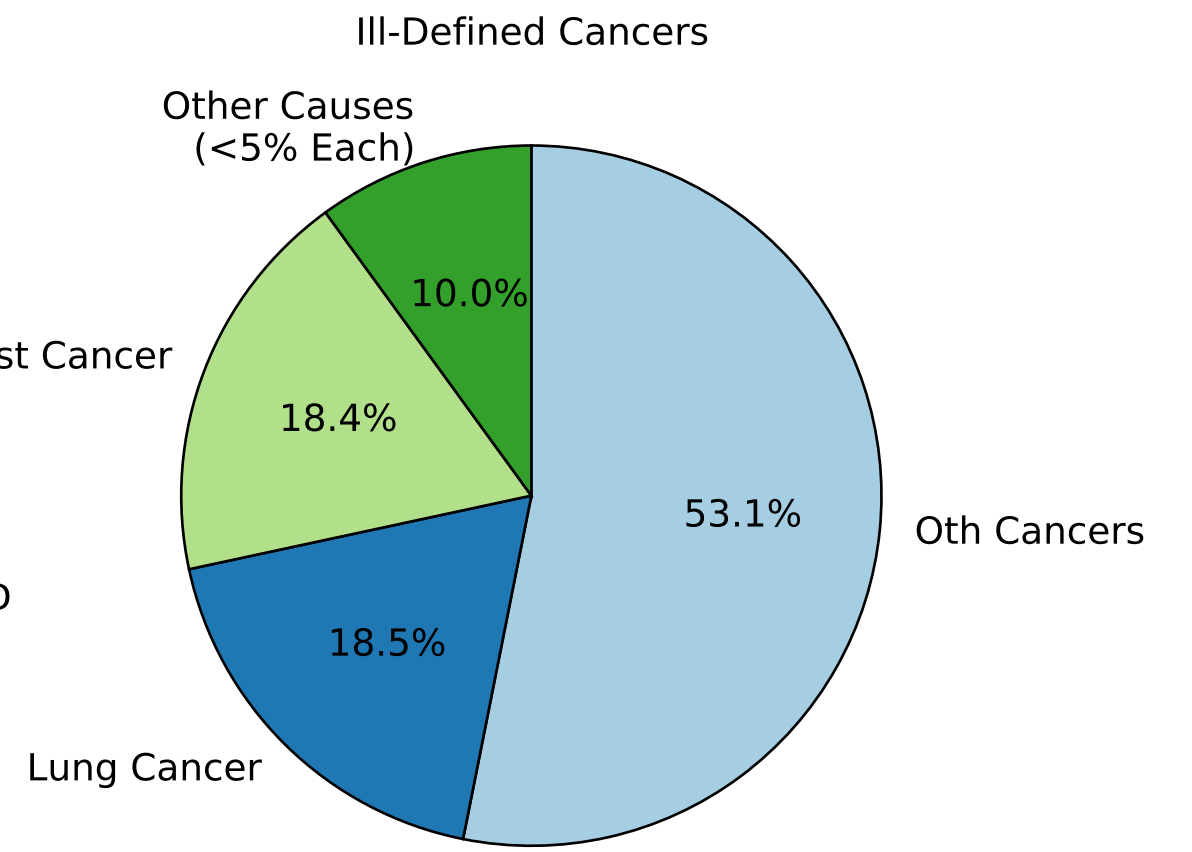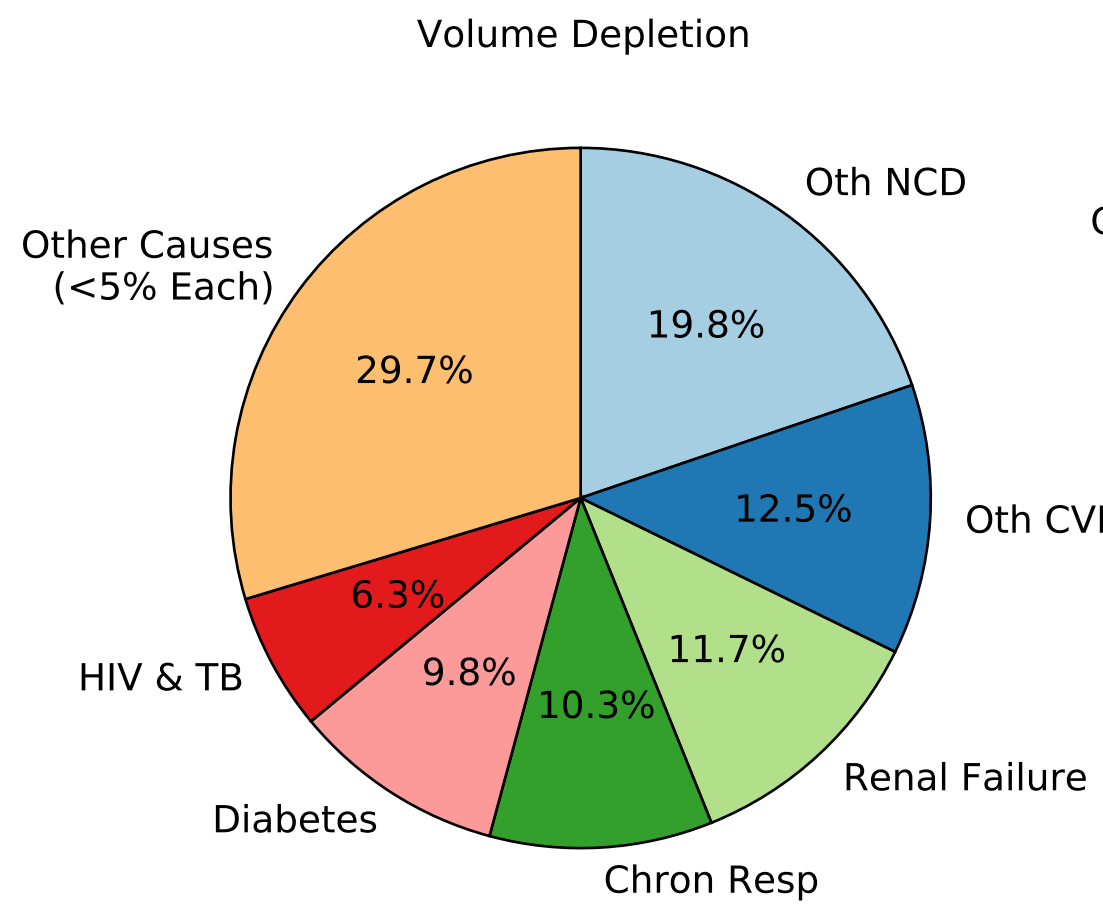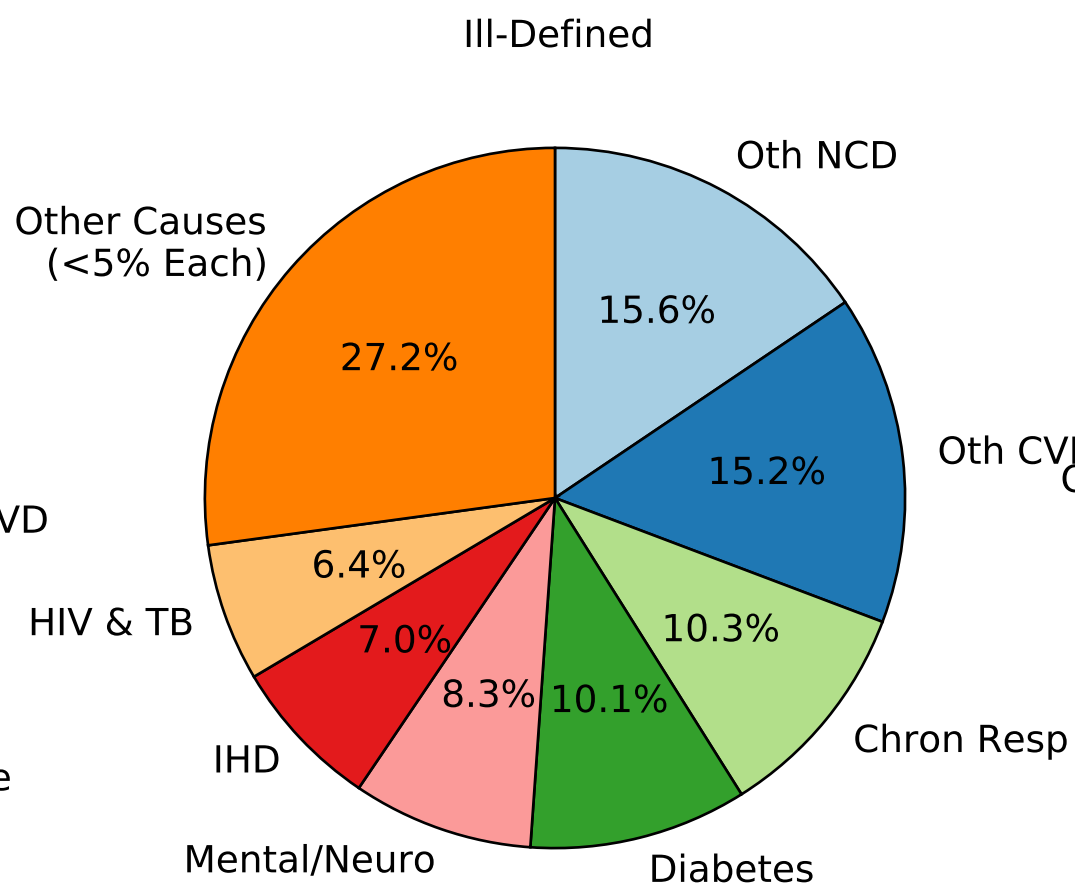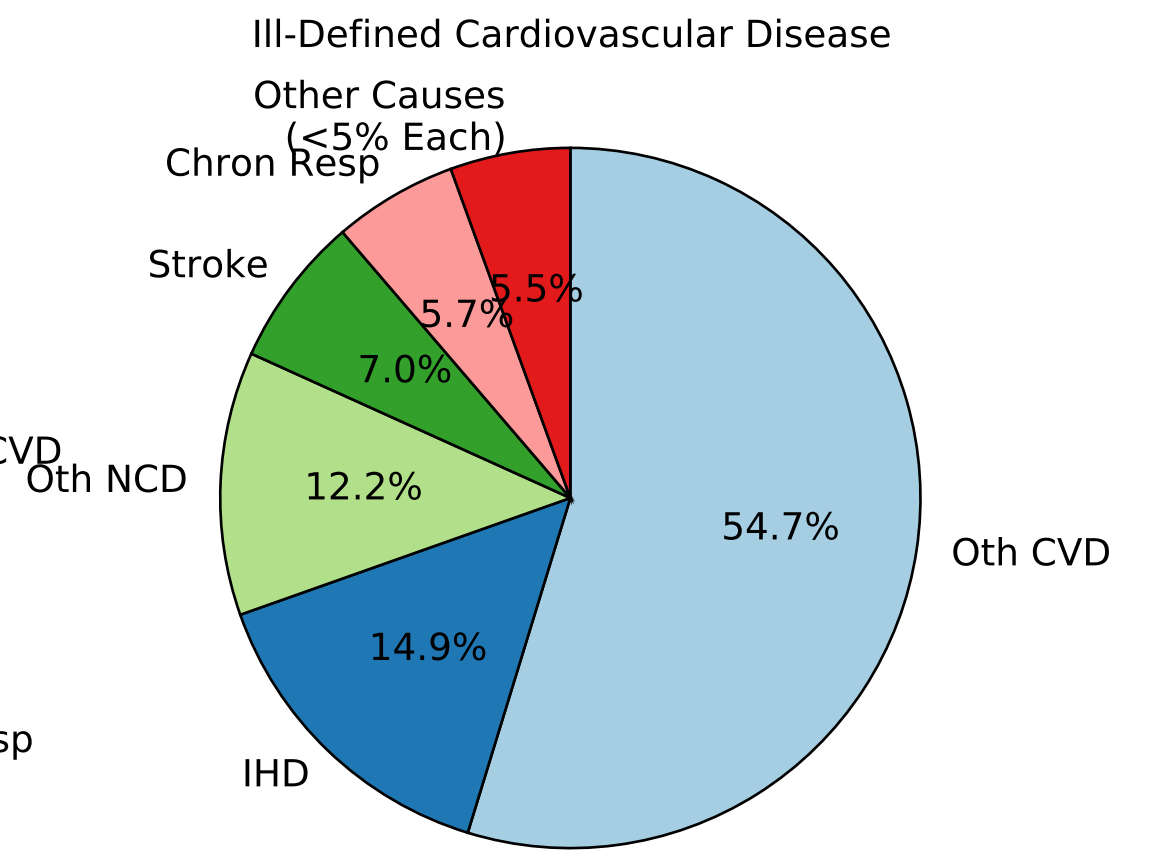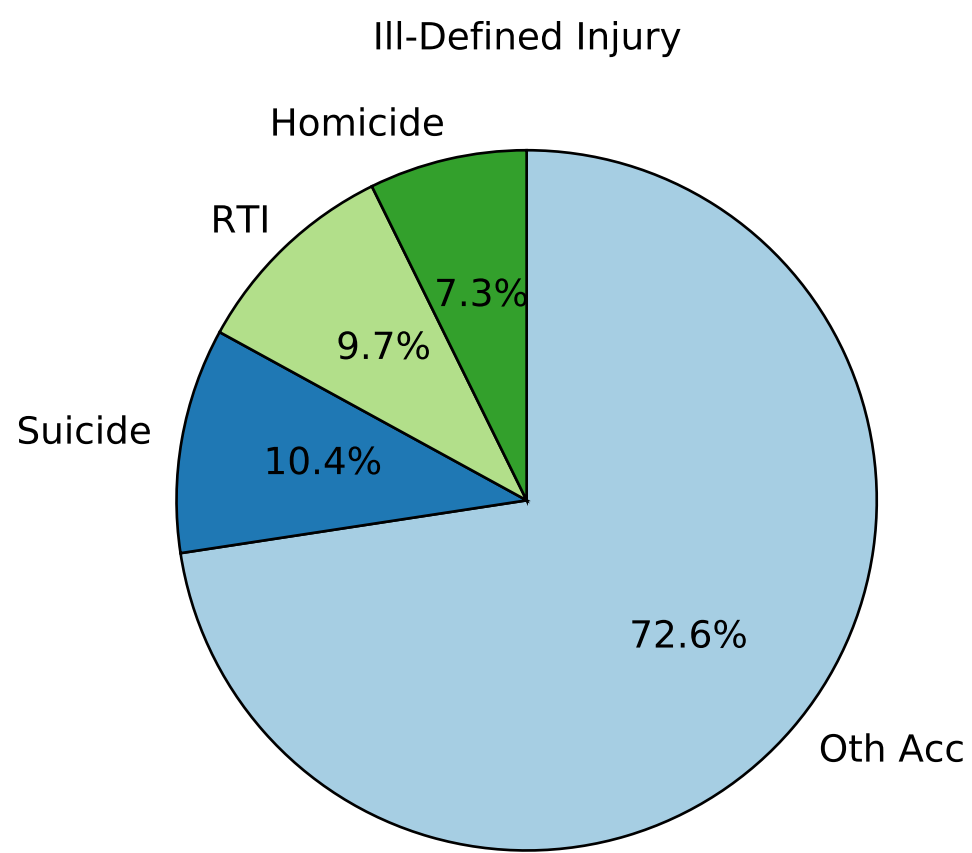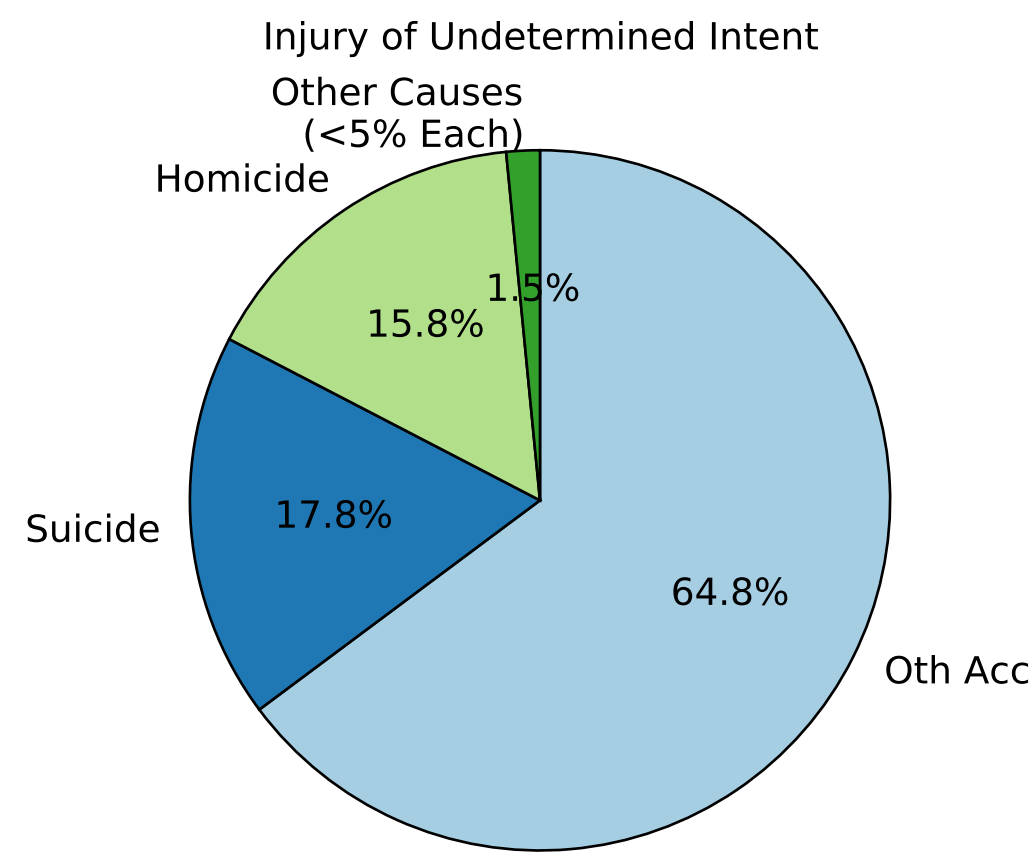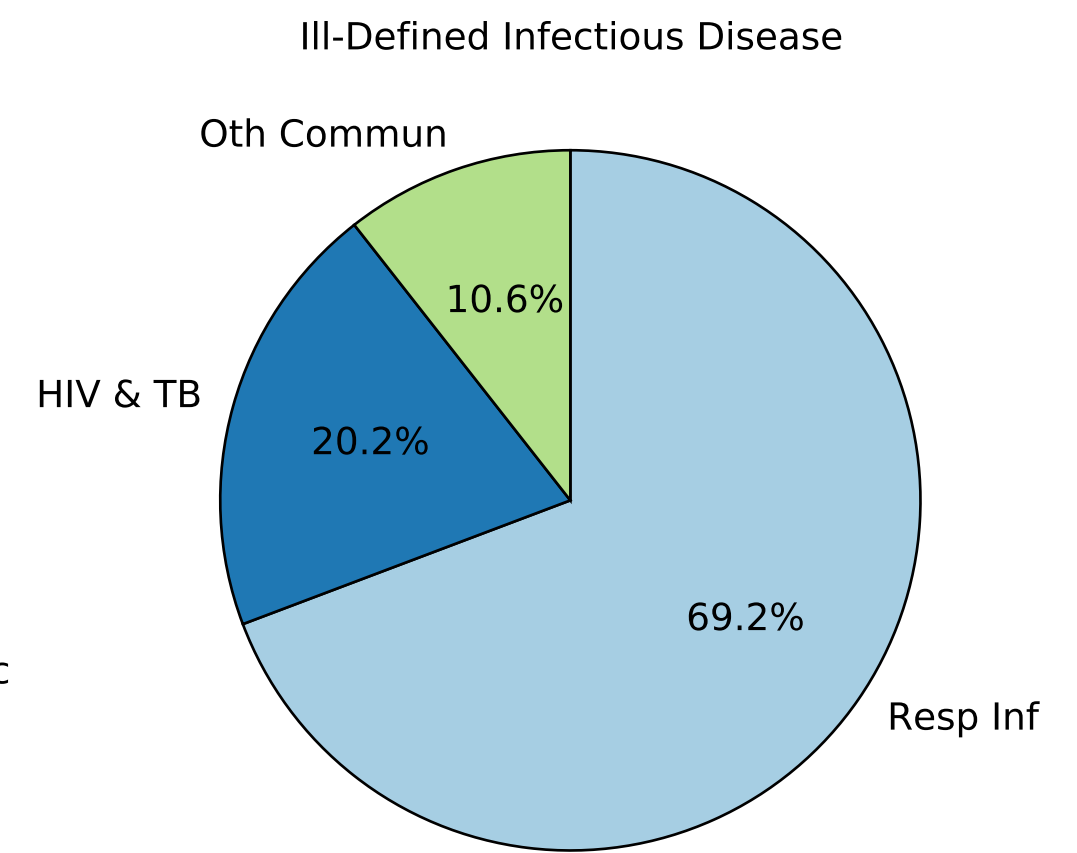

ICD 10  
Female, Age 55

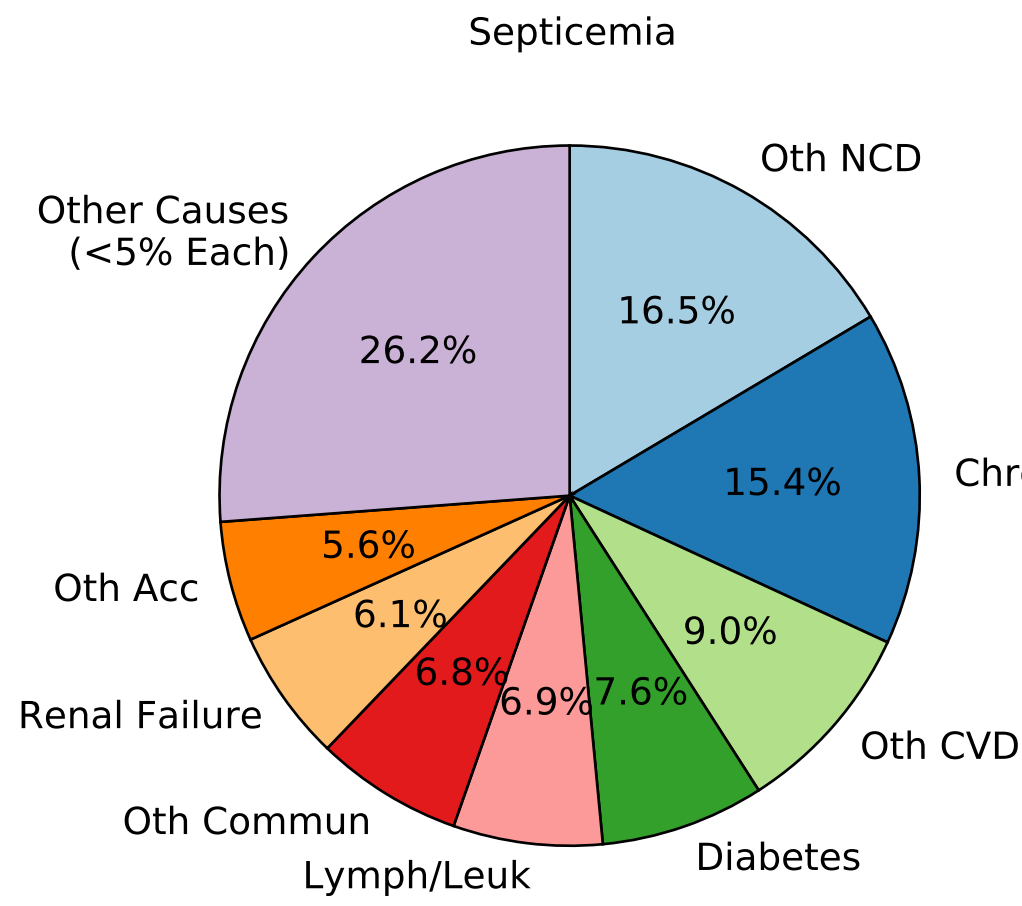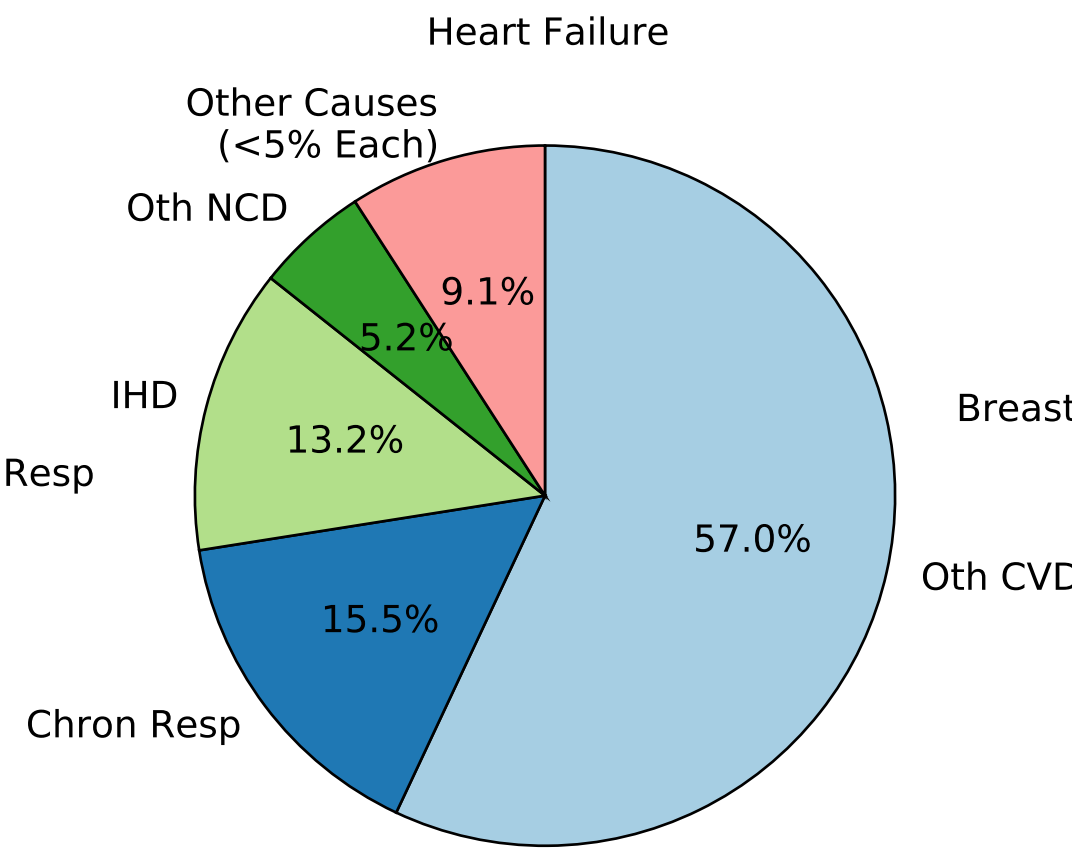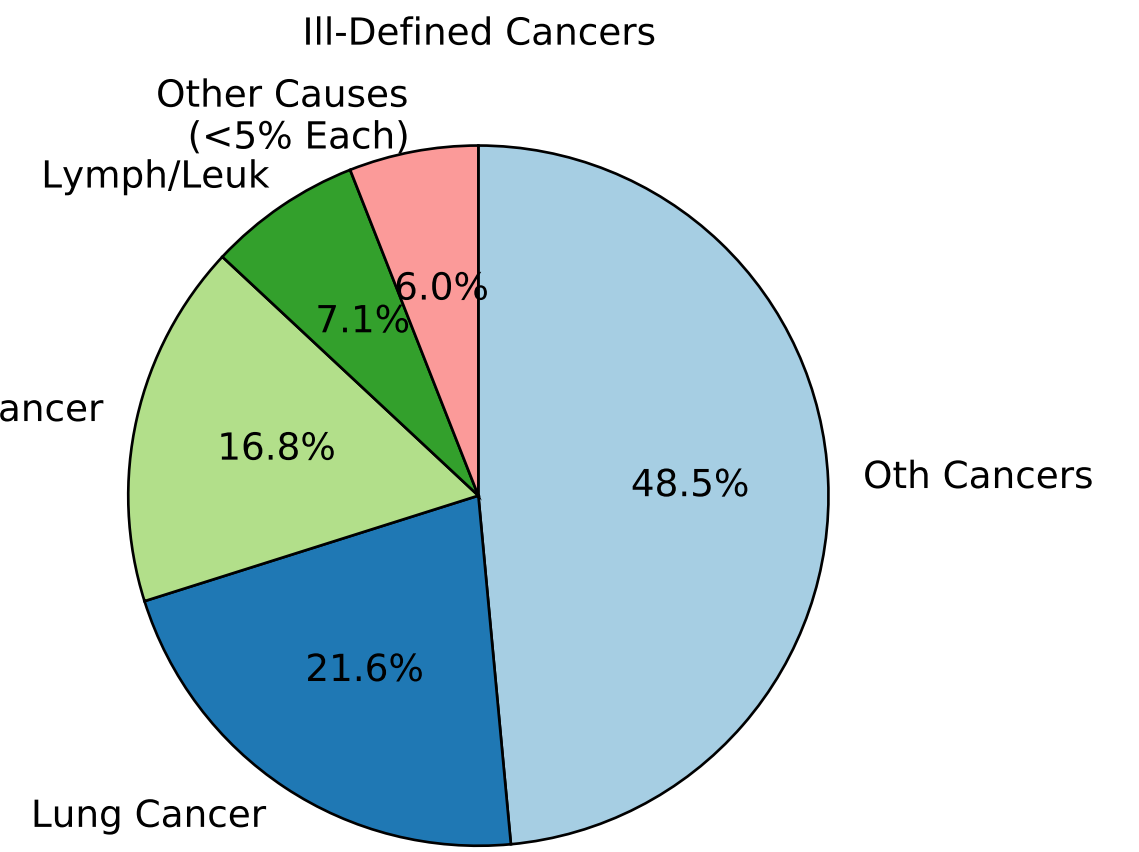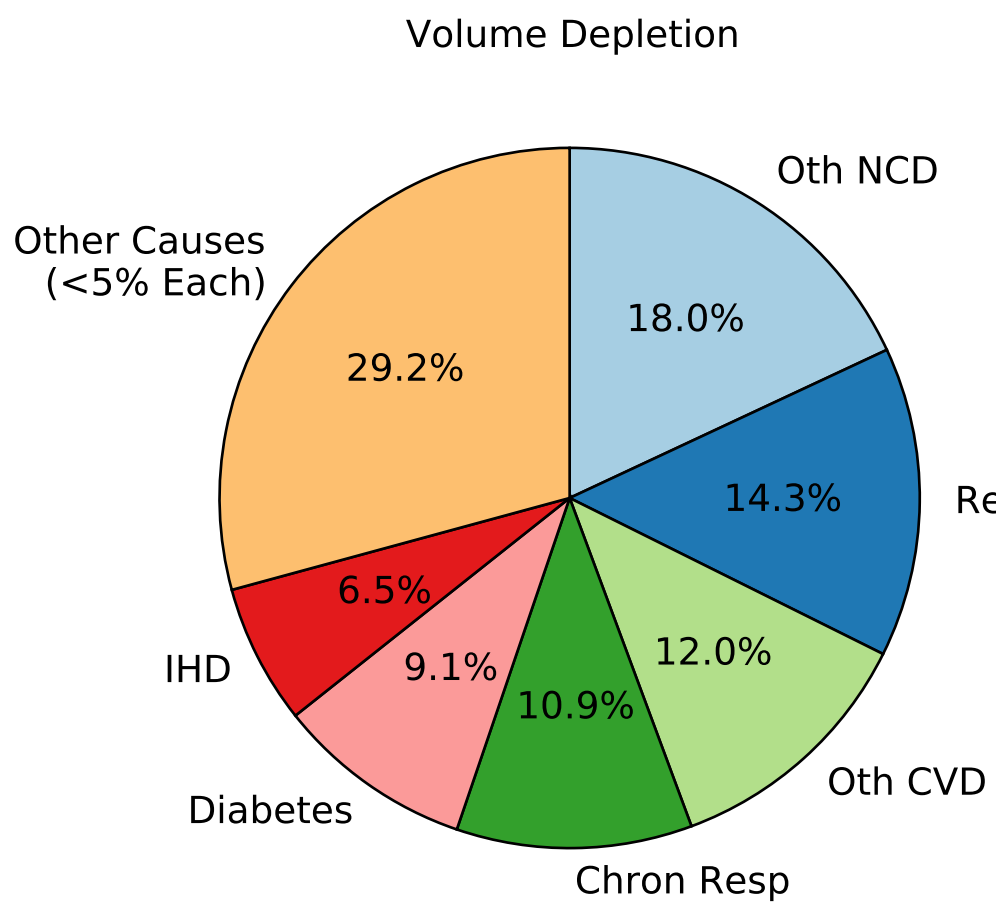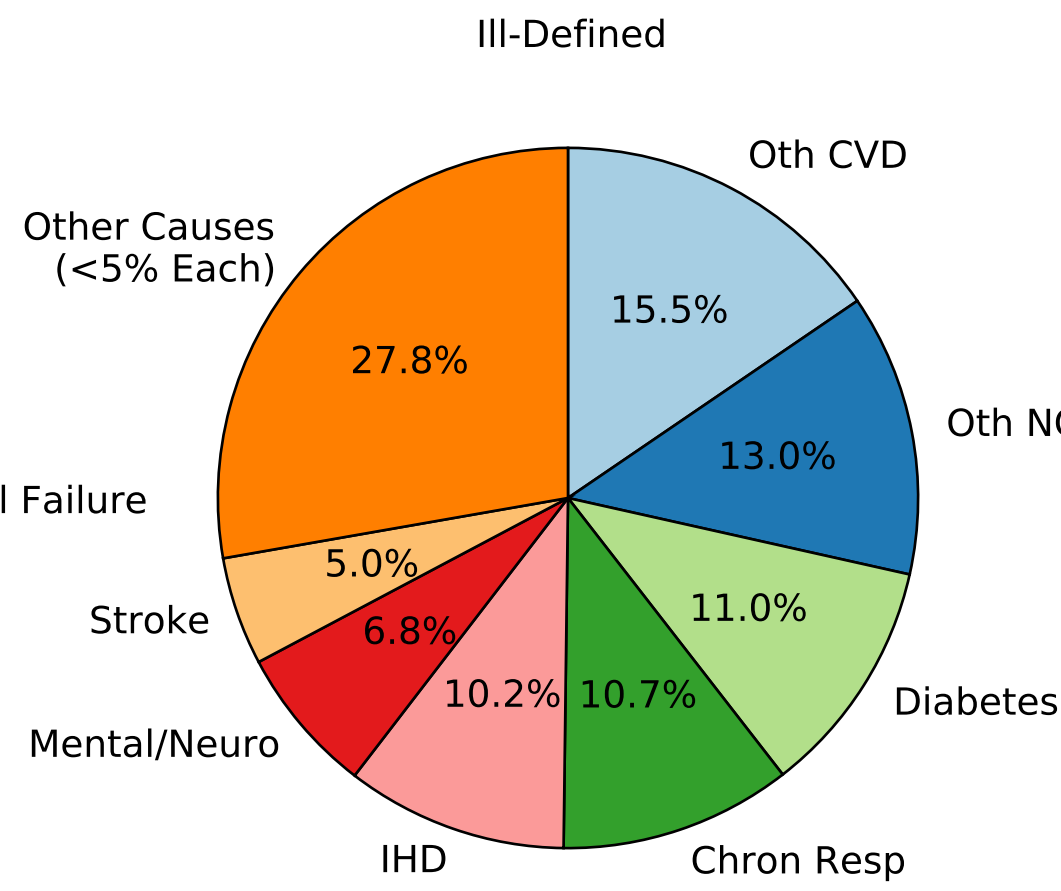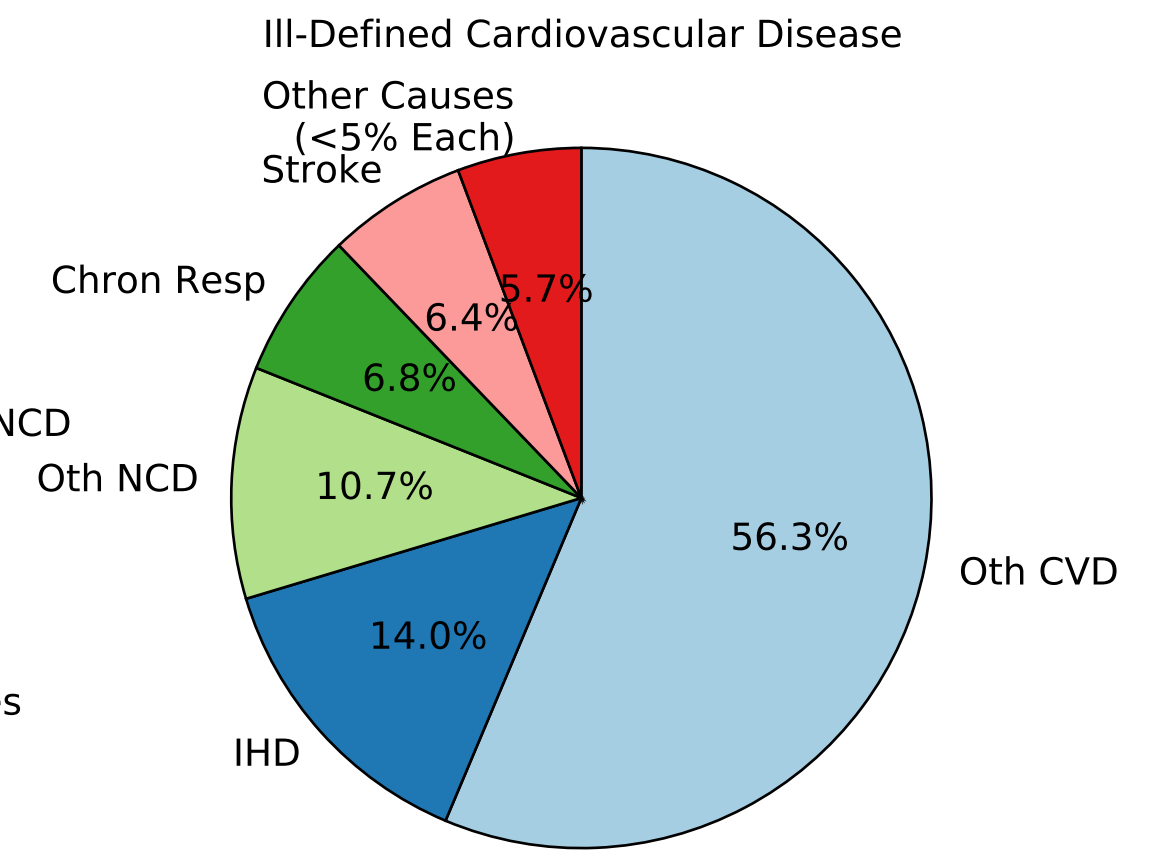

Ill-Defined Injury

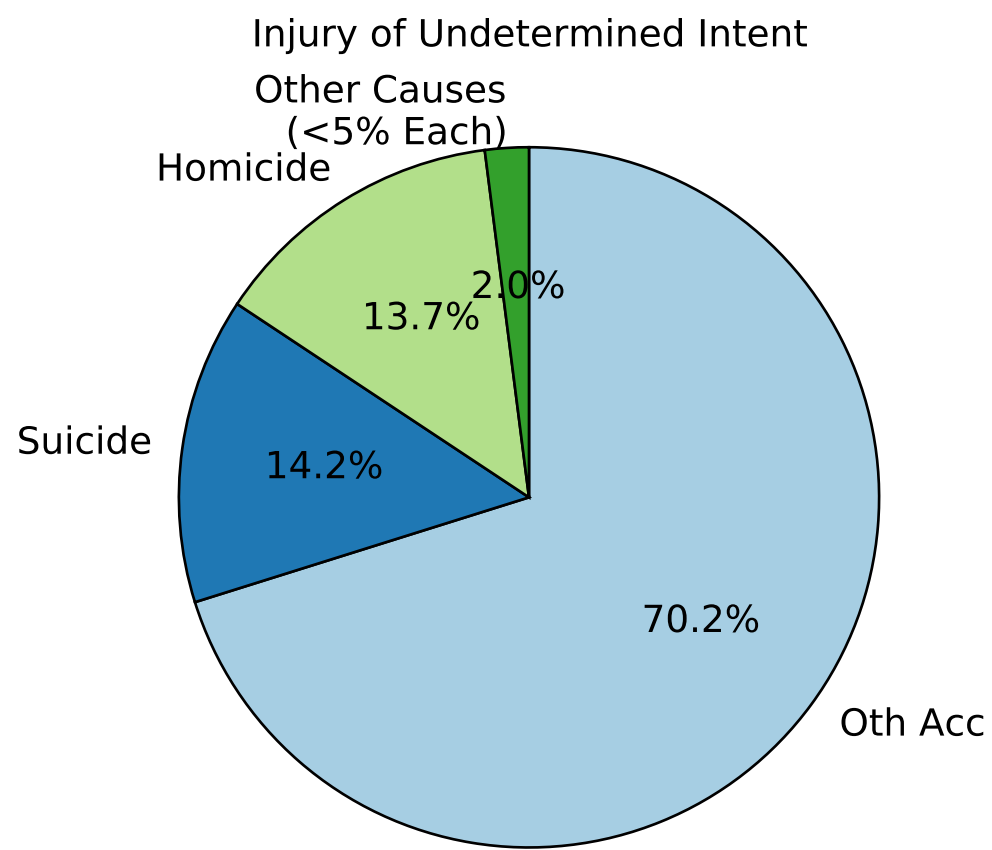

Ill-Defined Infectious Disease

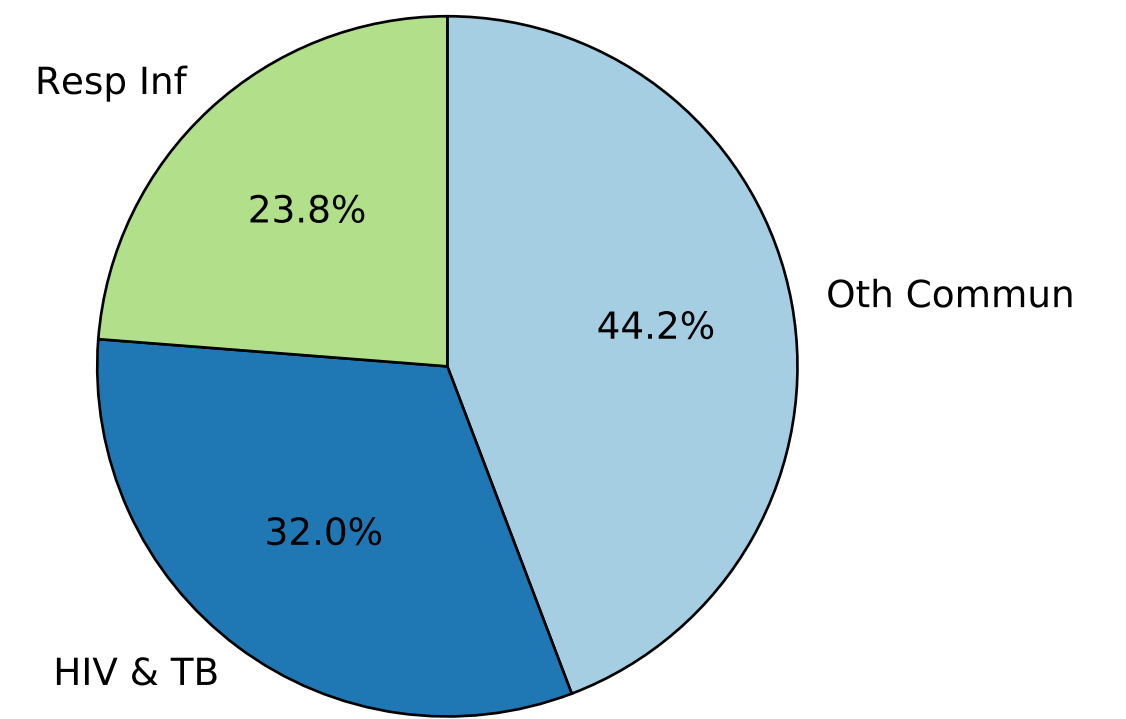



ICD 10  
Female, Age 60

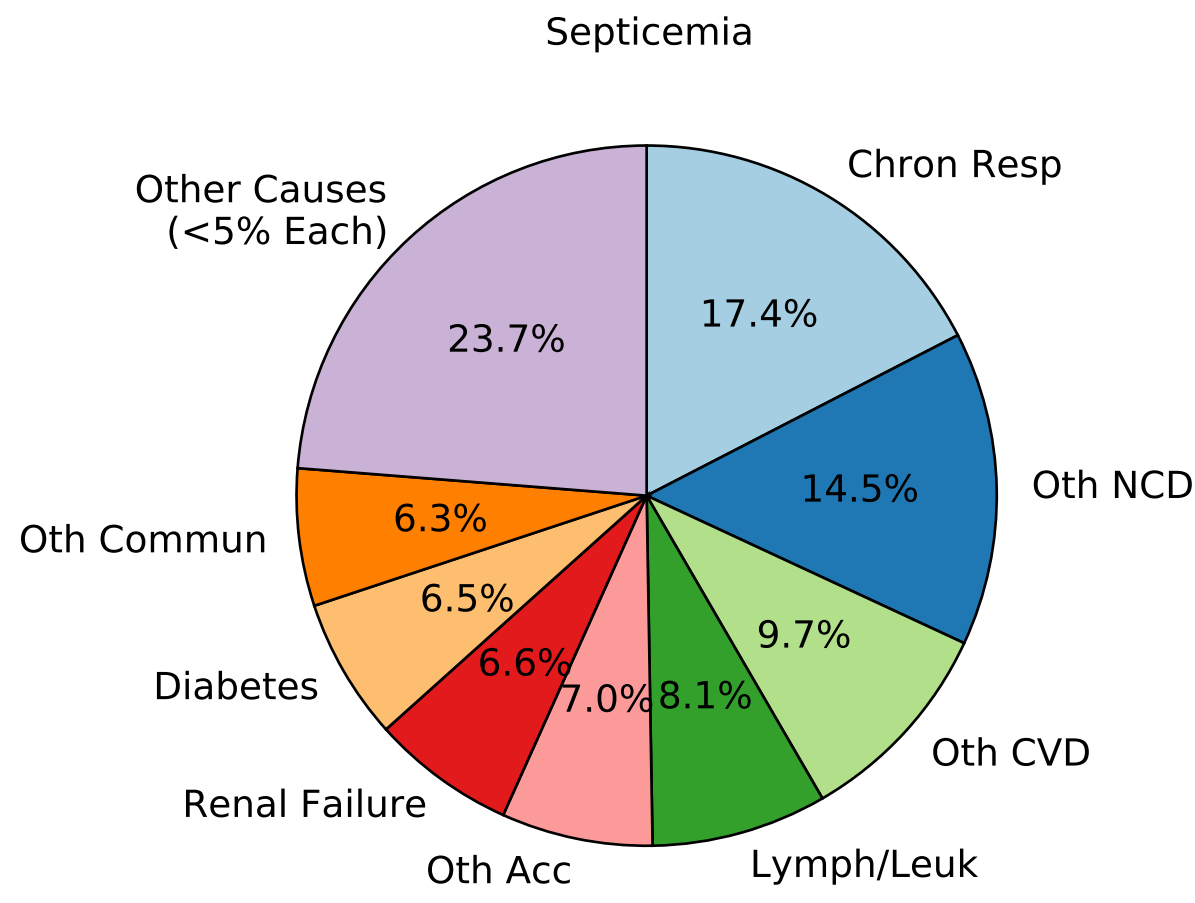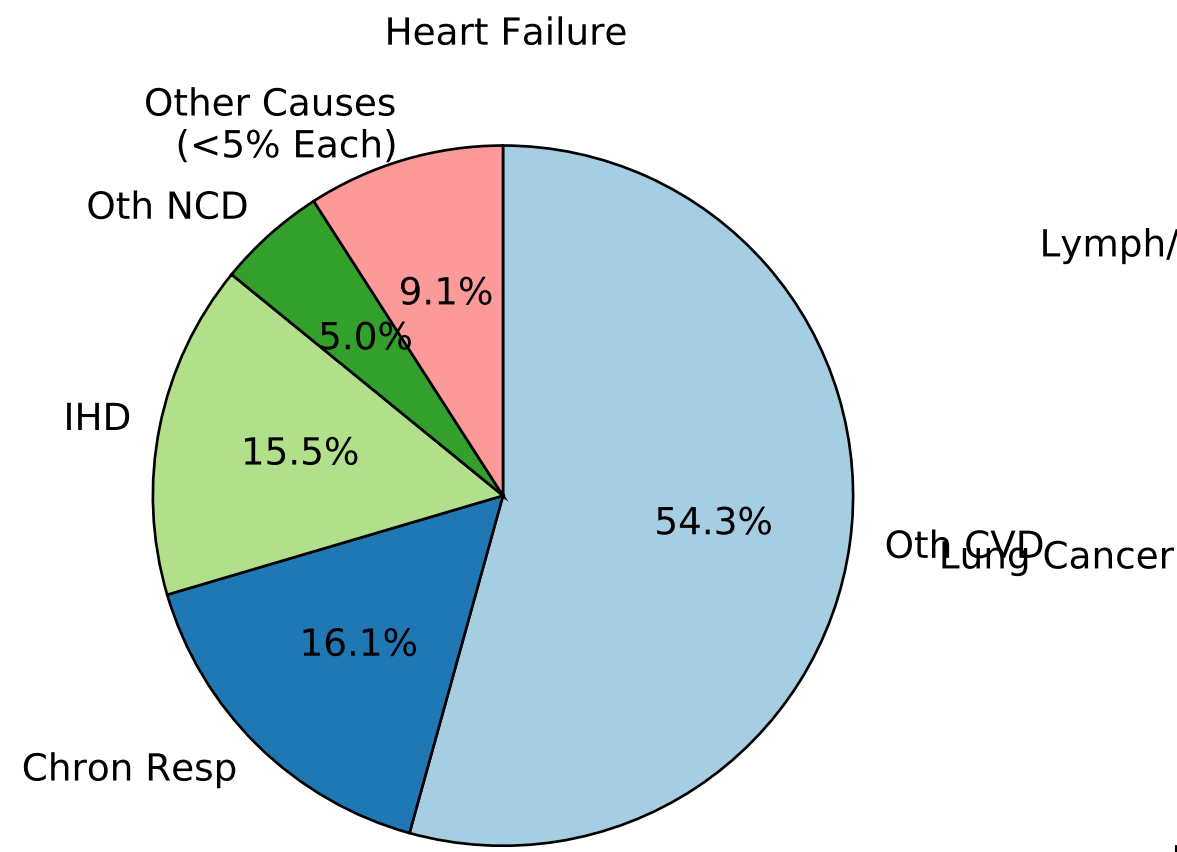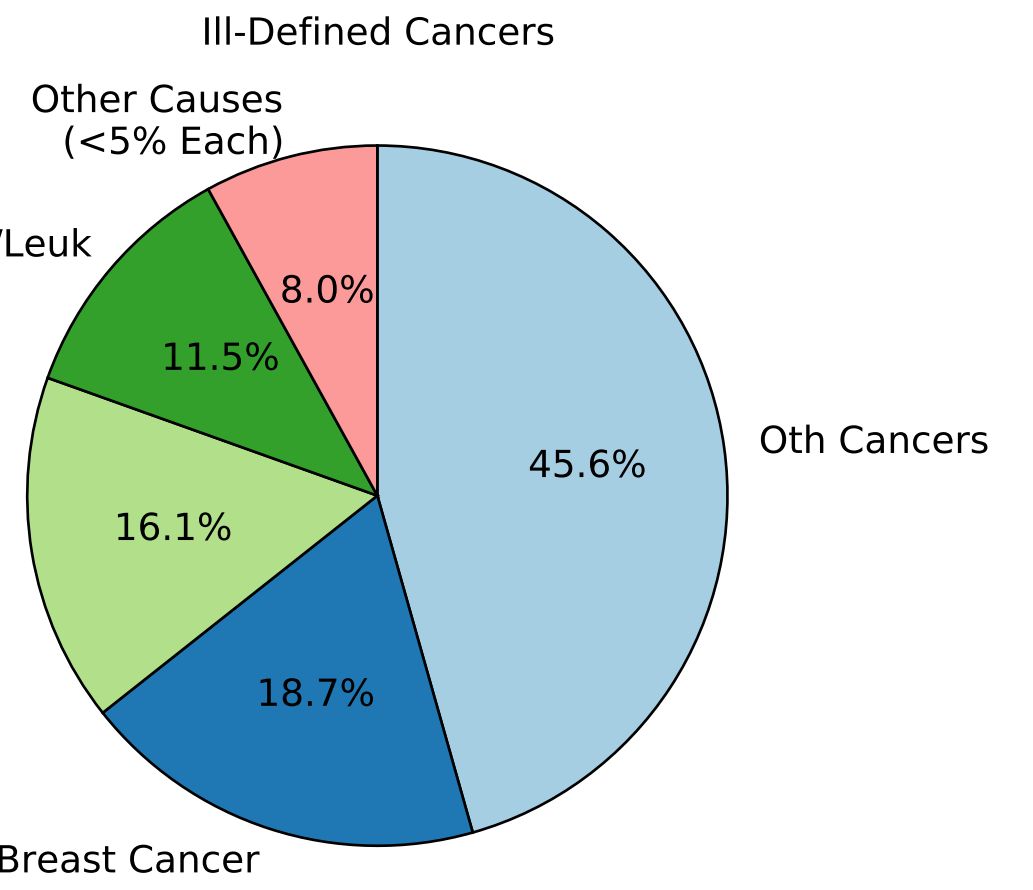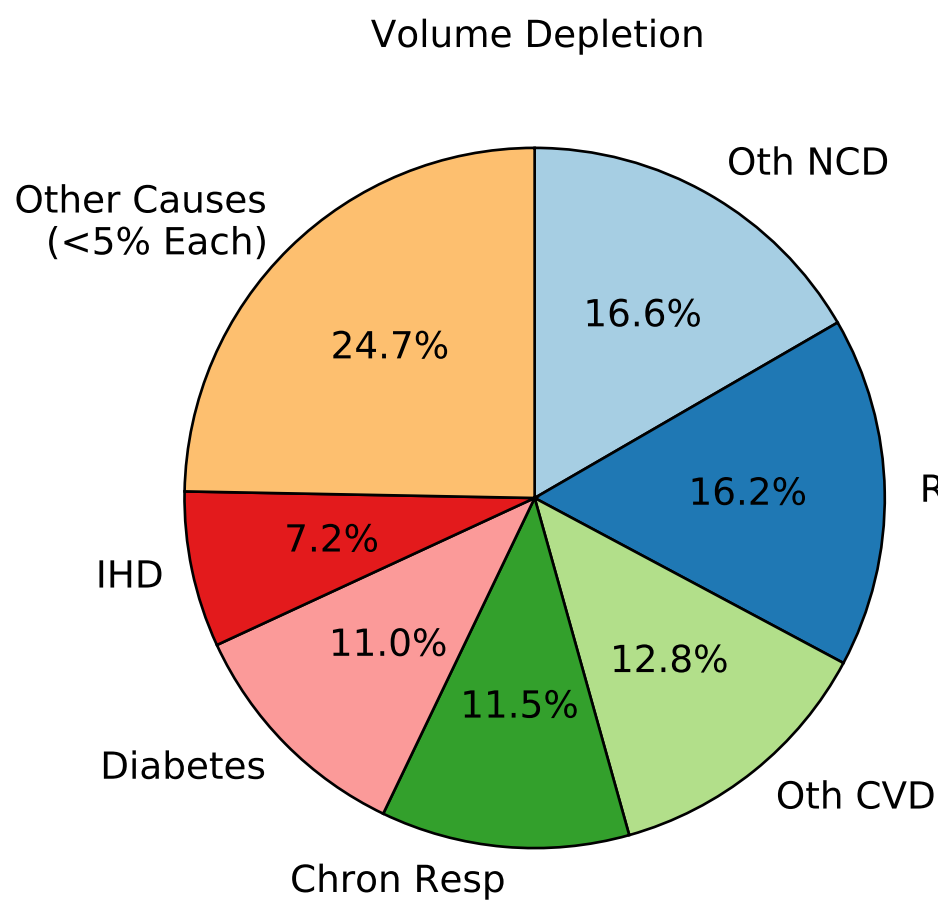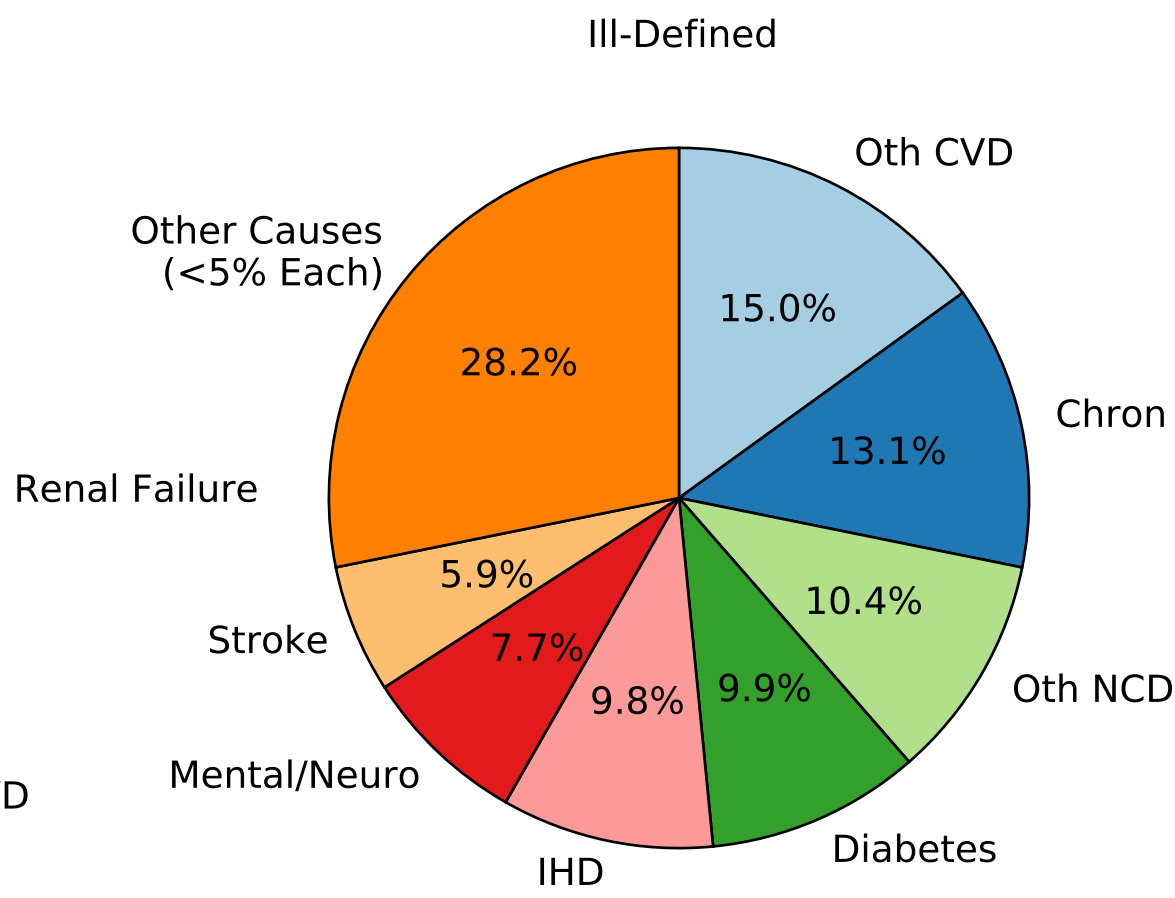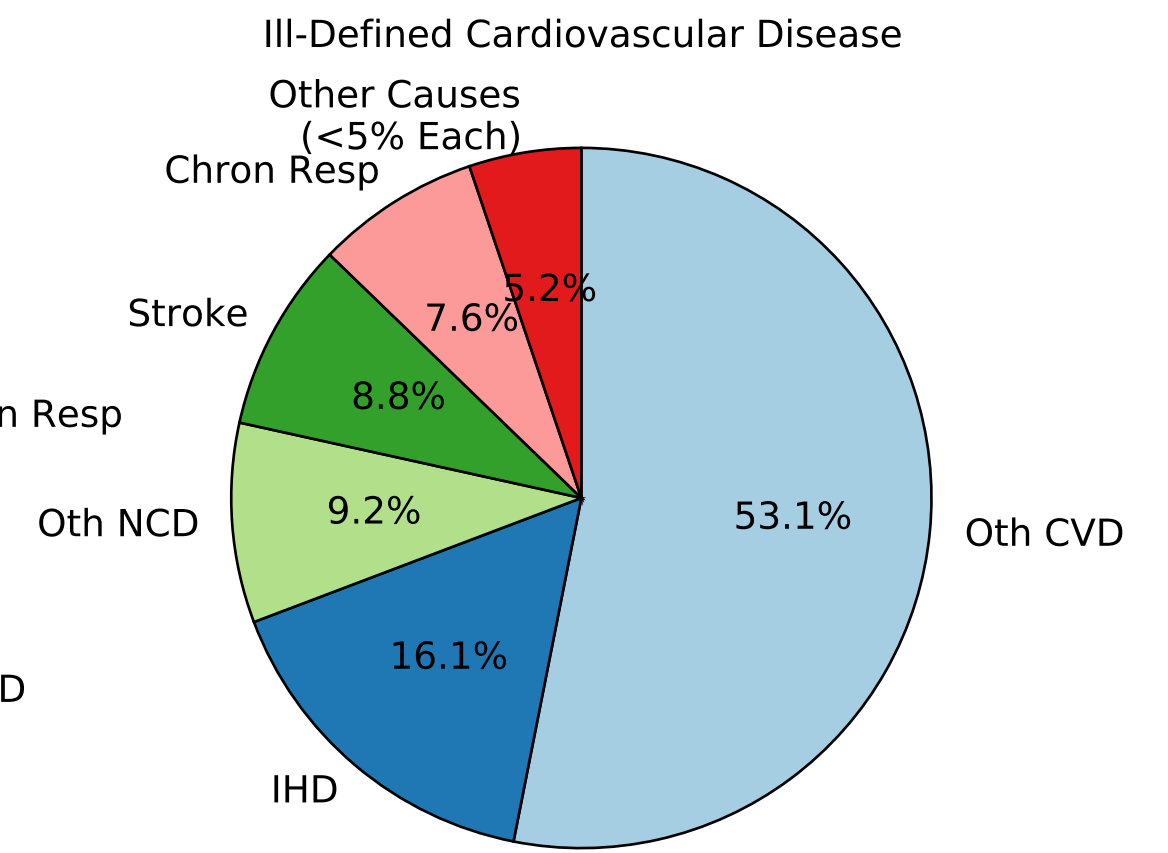

Ill-Defined Injury

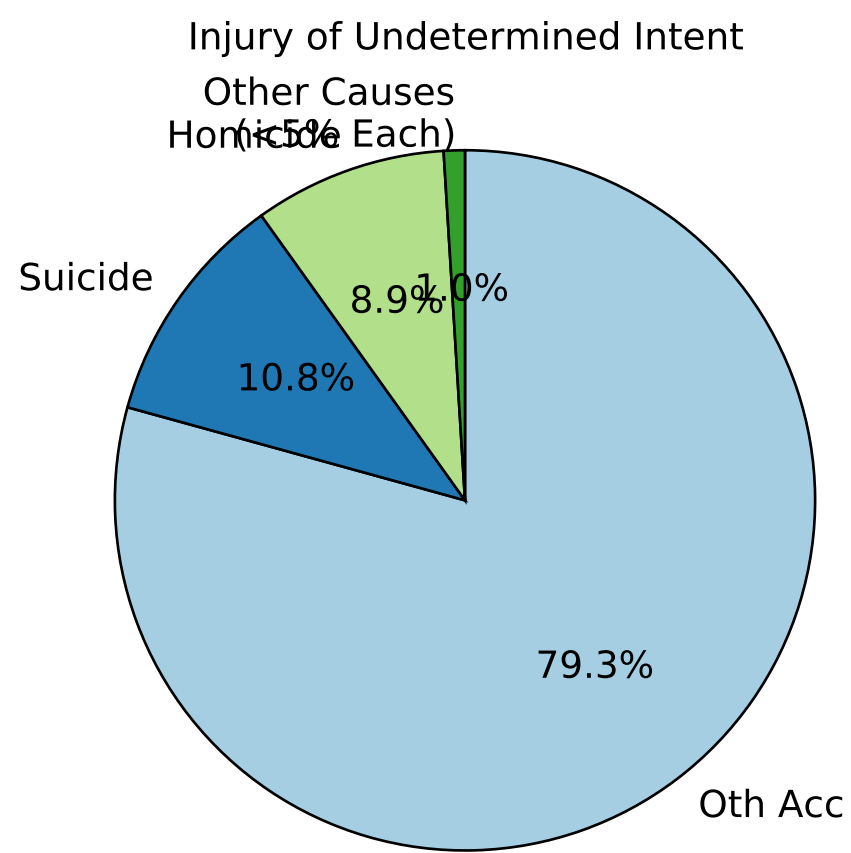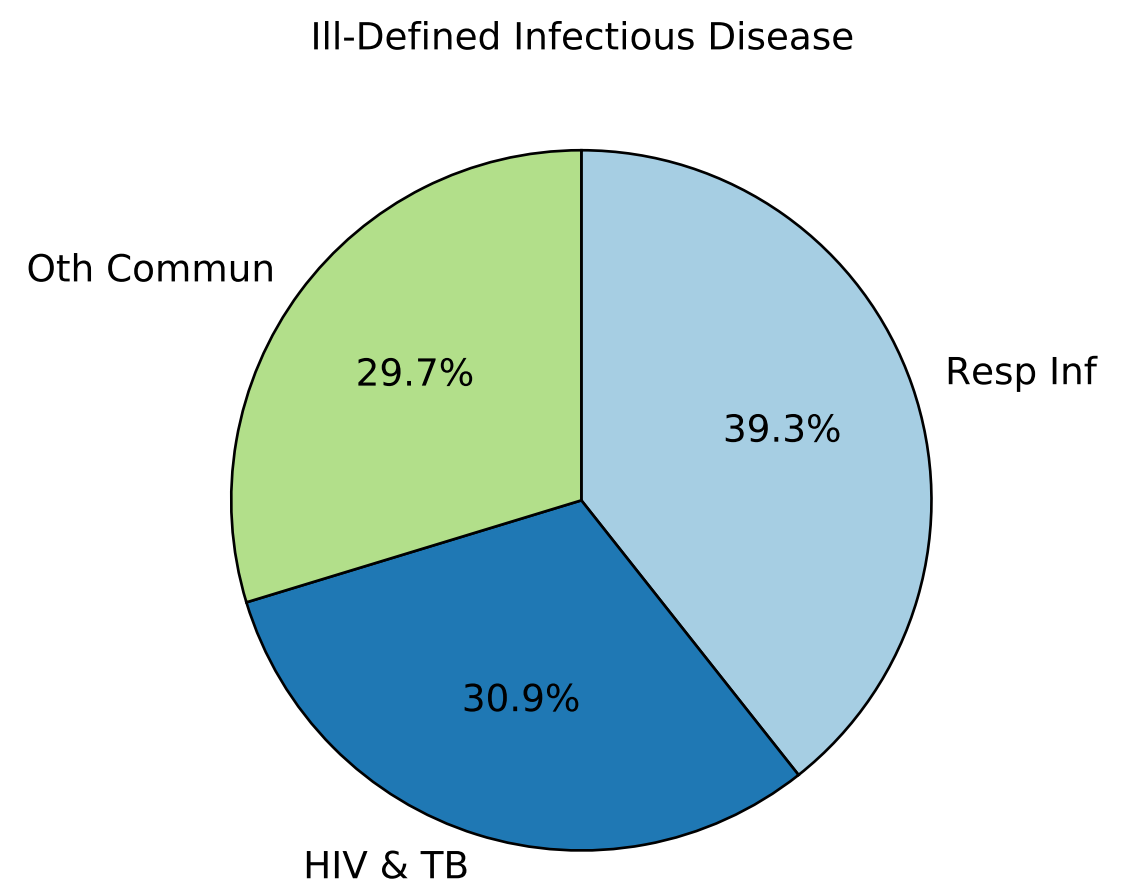

ICD 10  
Female, Age 65

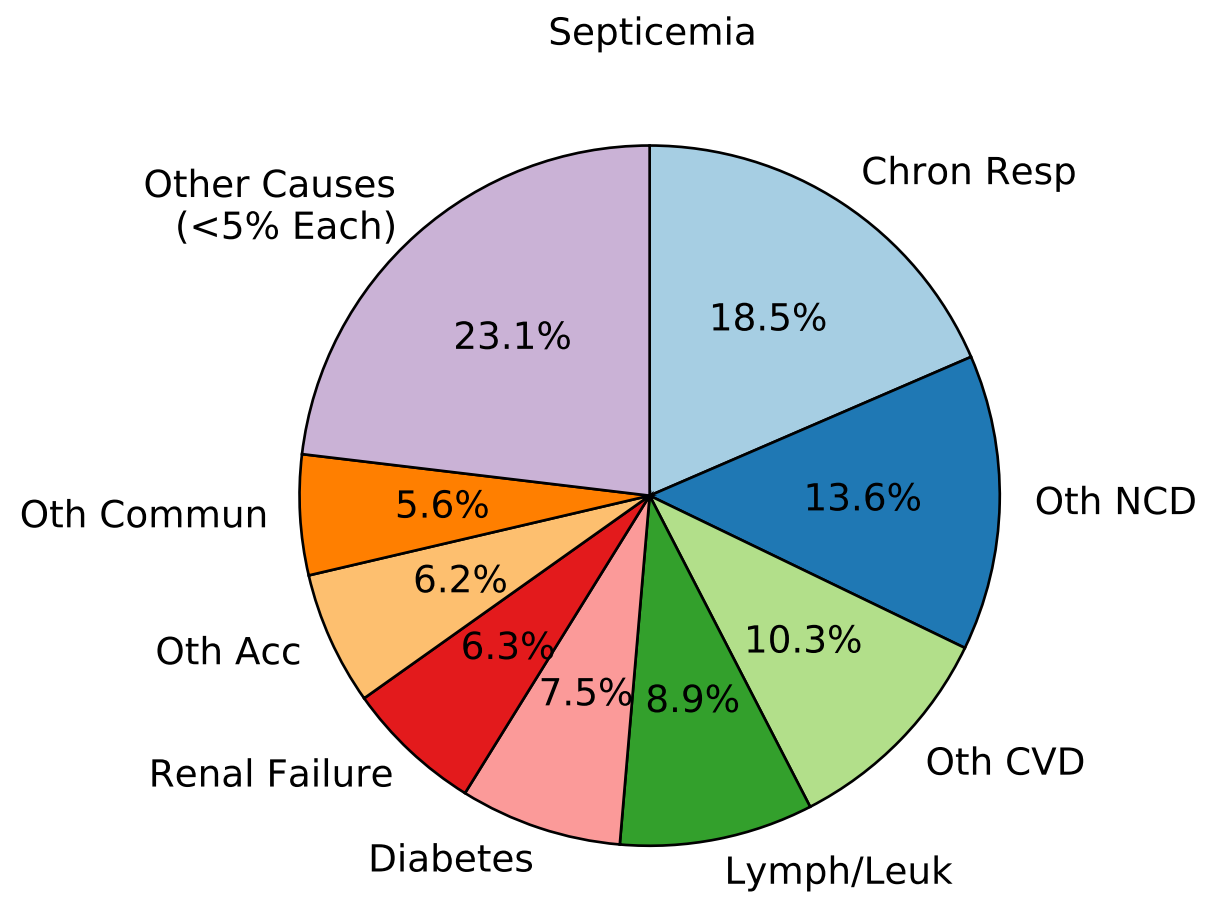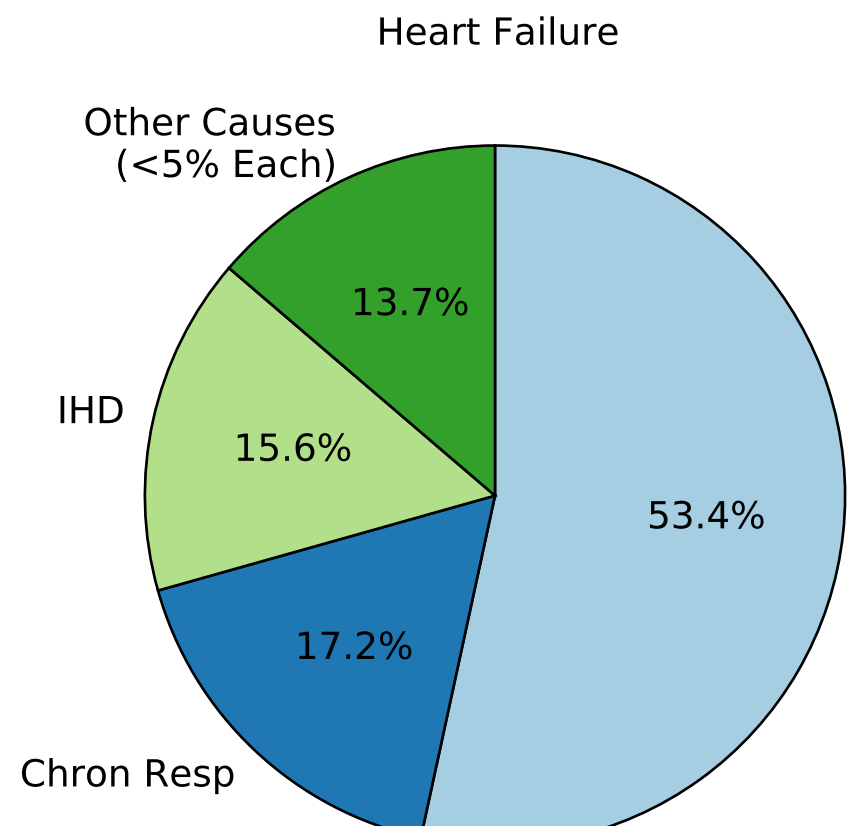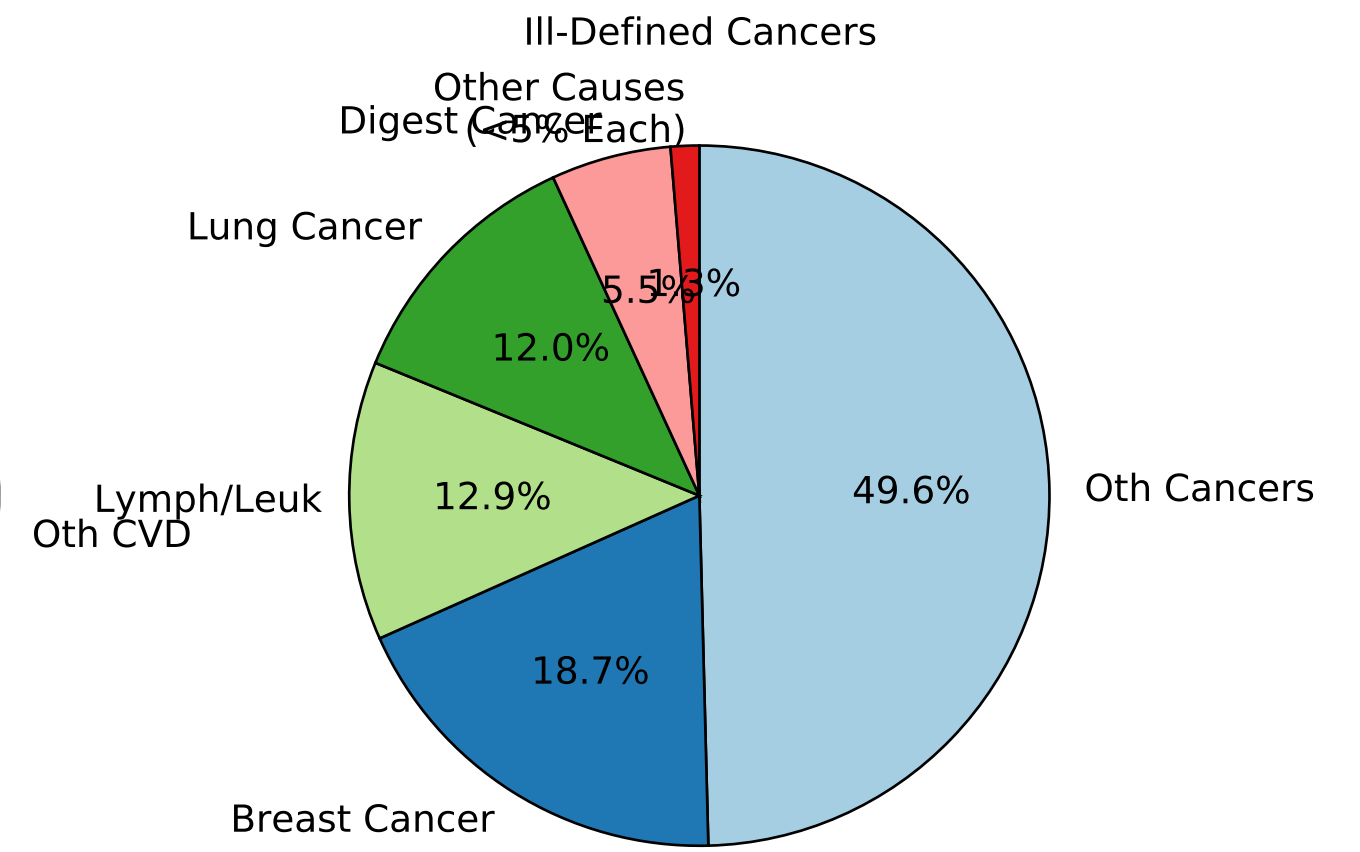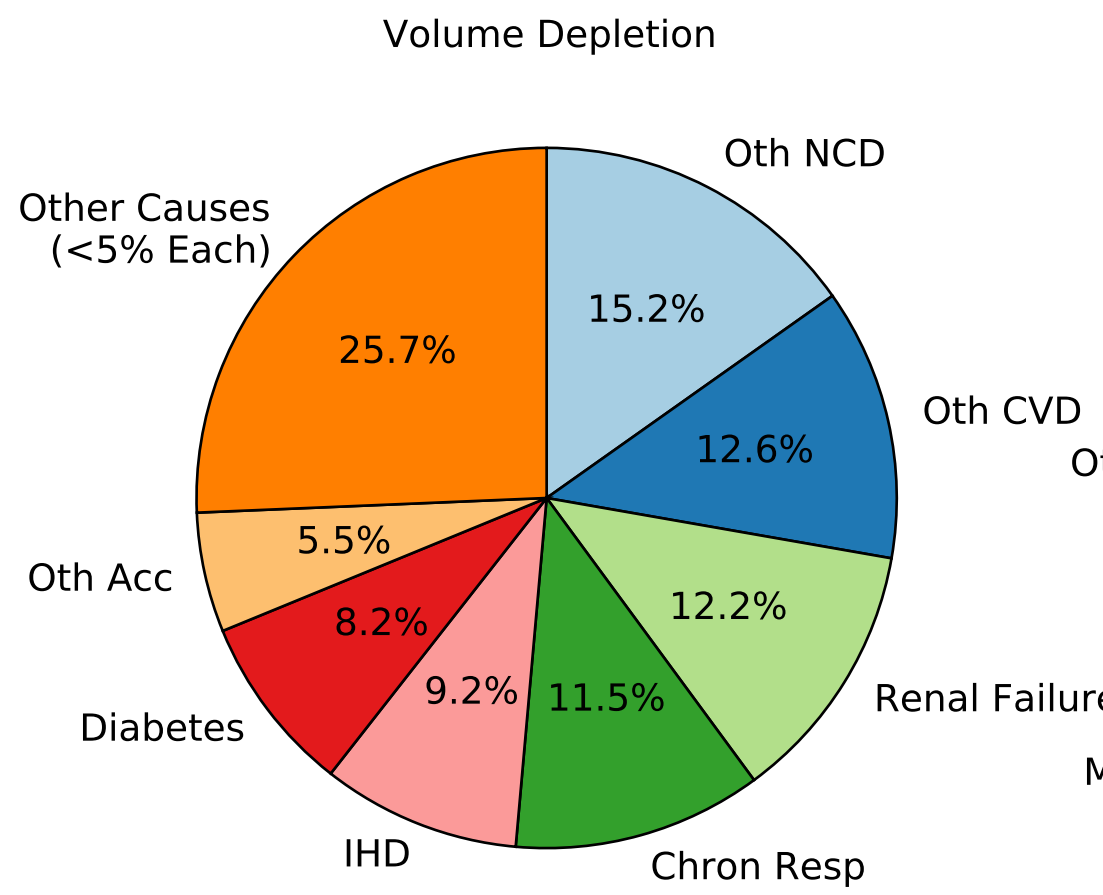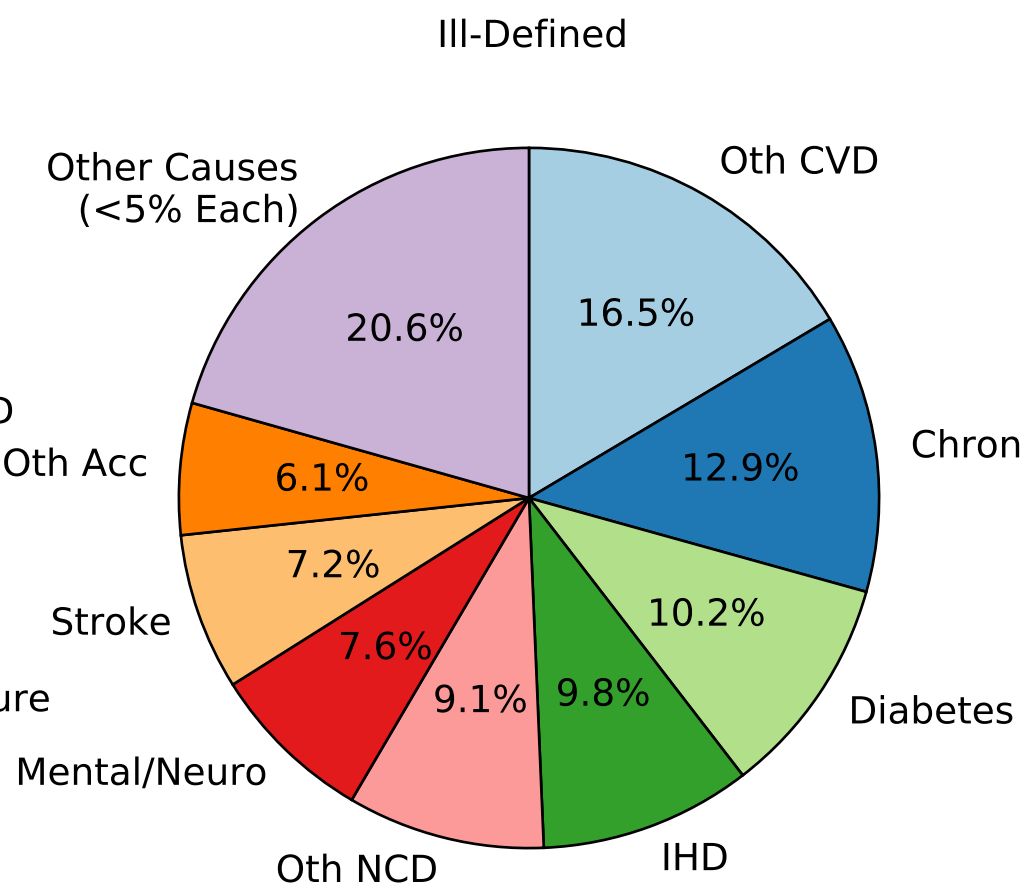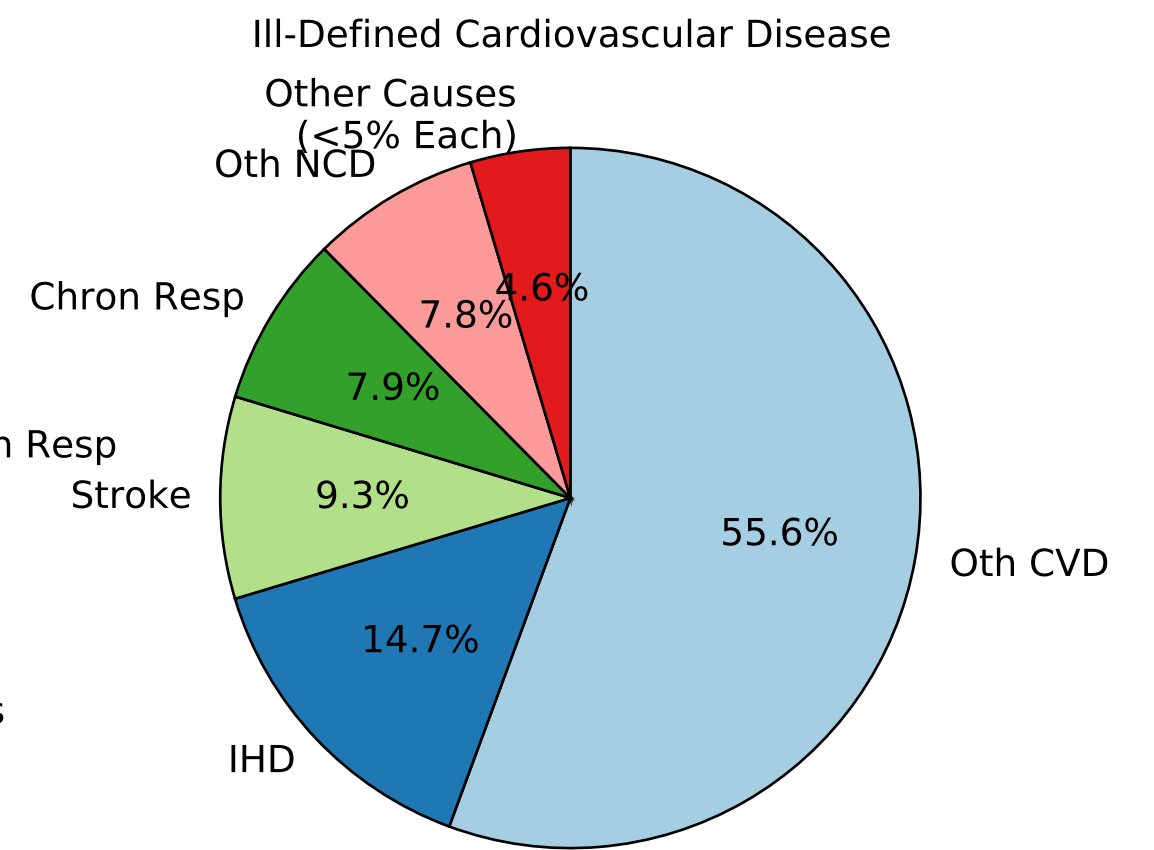

Ill-Defined Injury

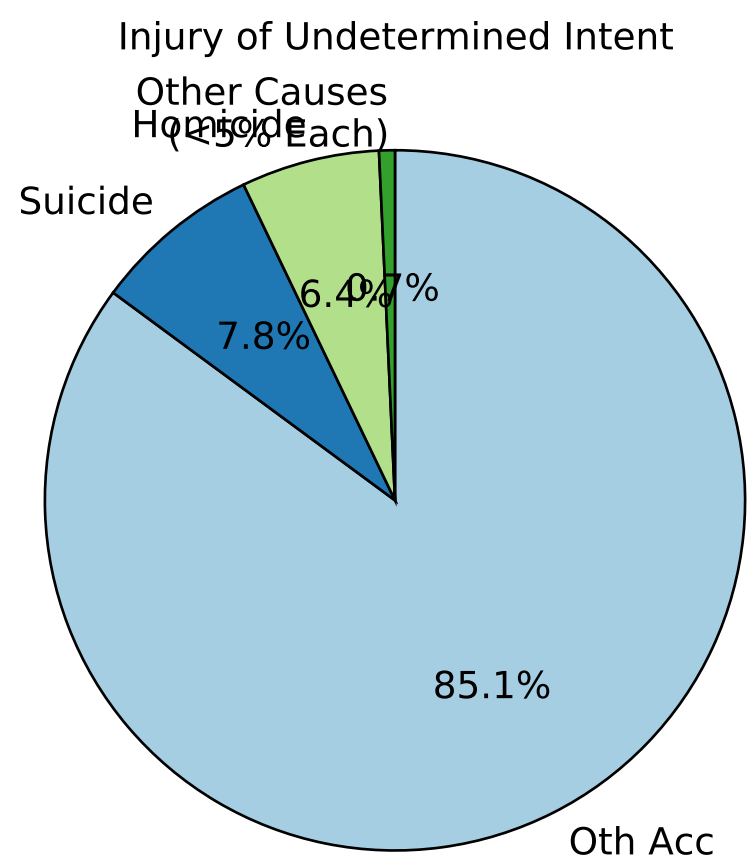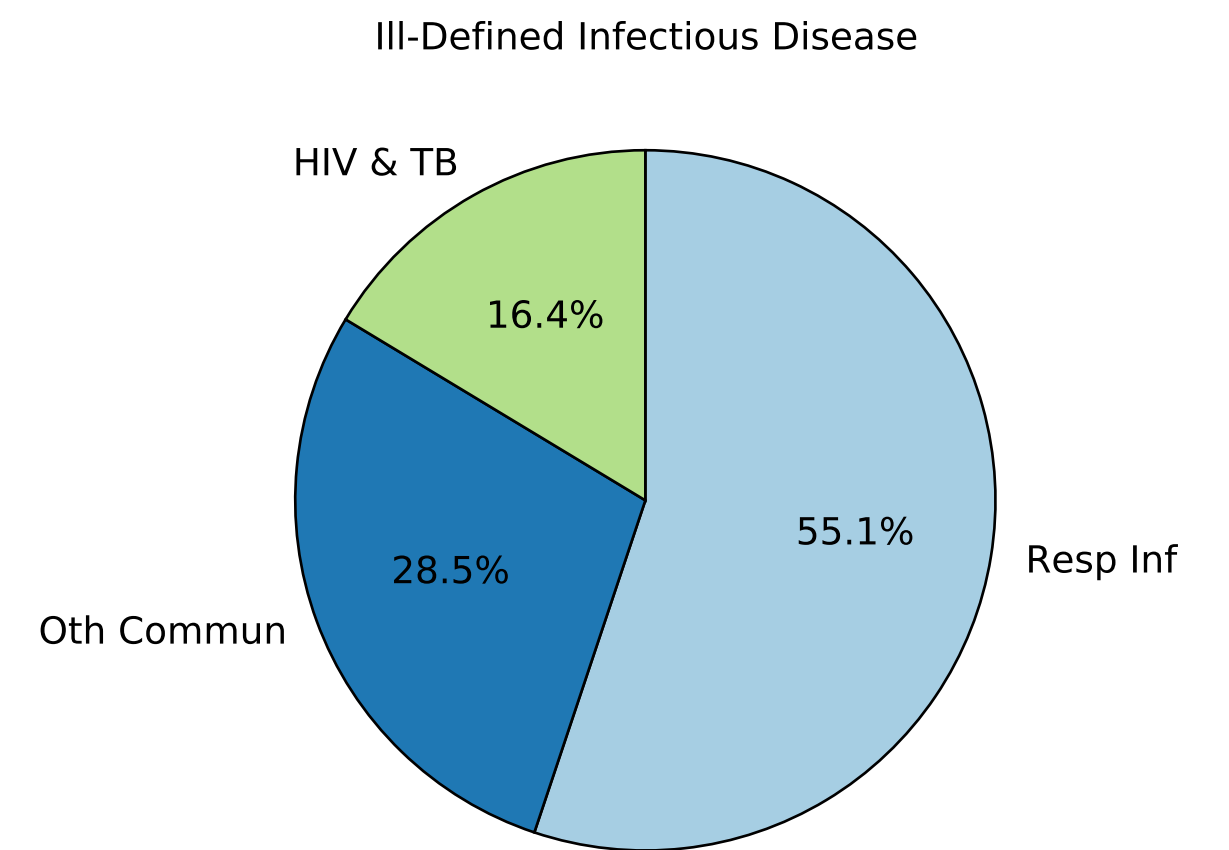

ICD 10  
Female, Age 70

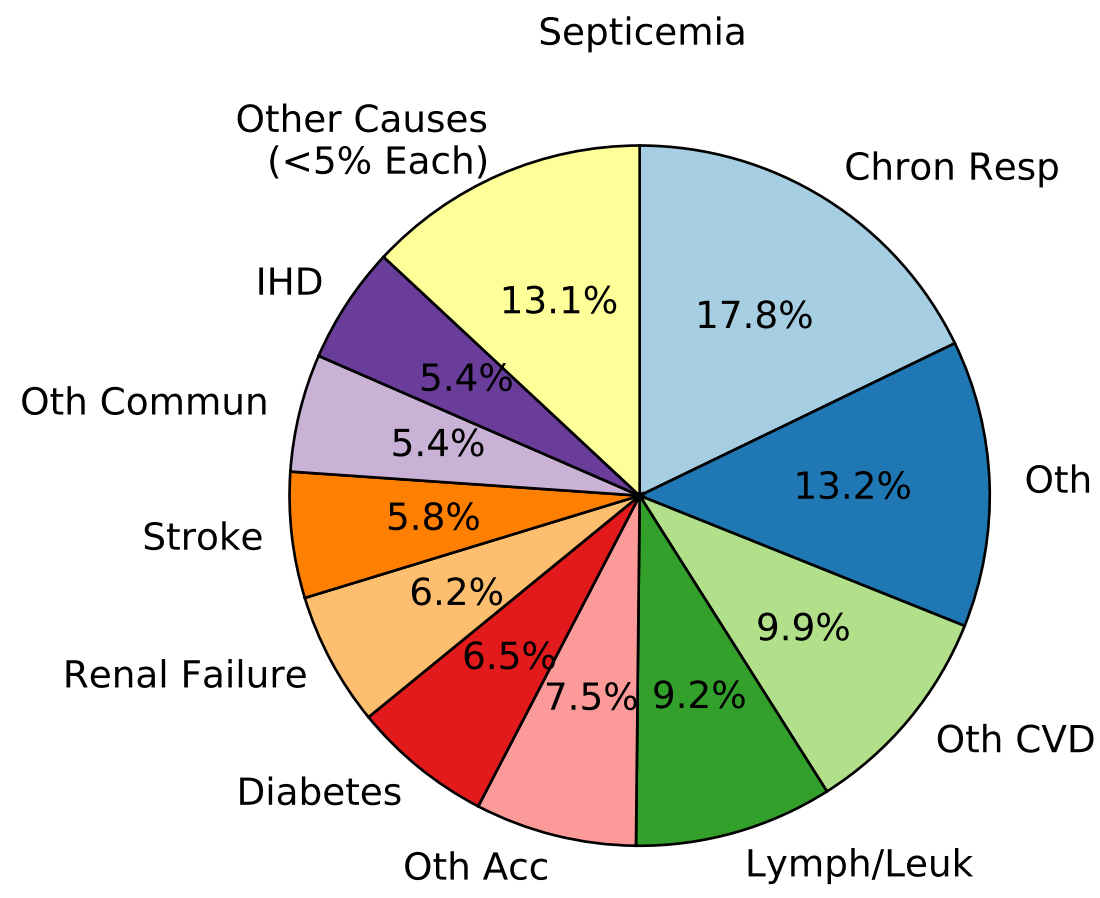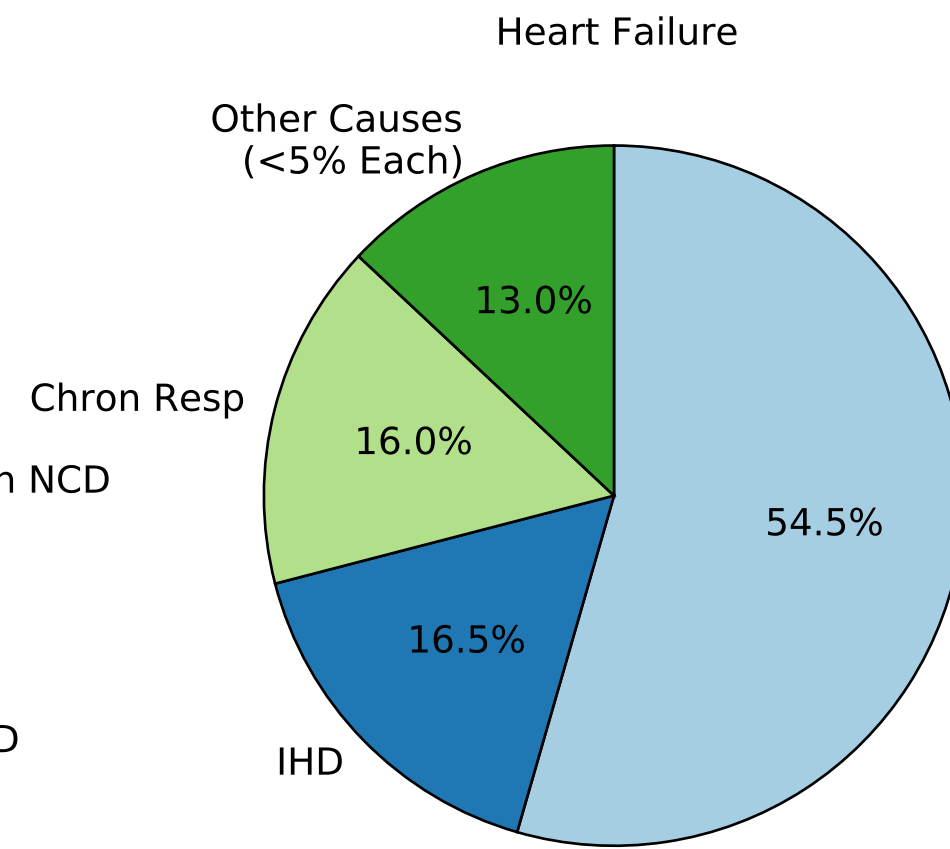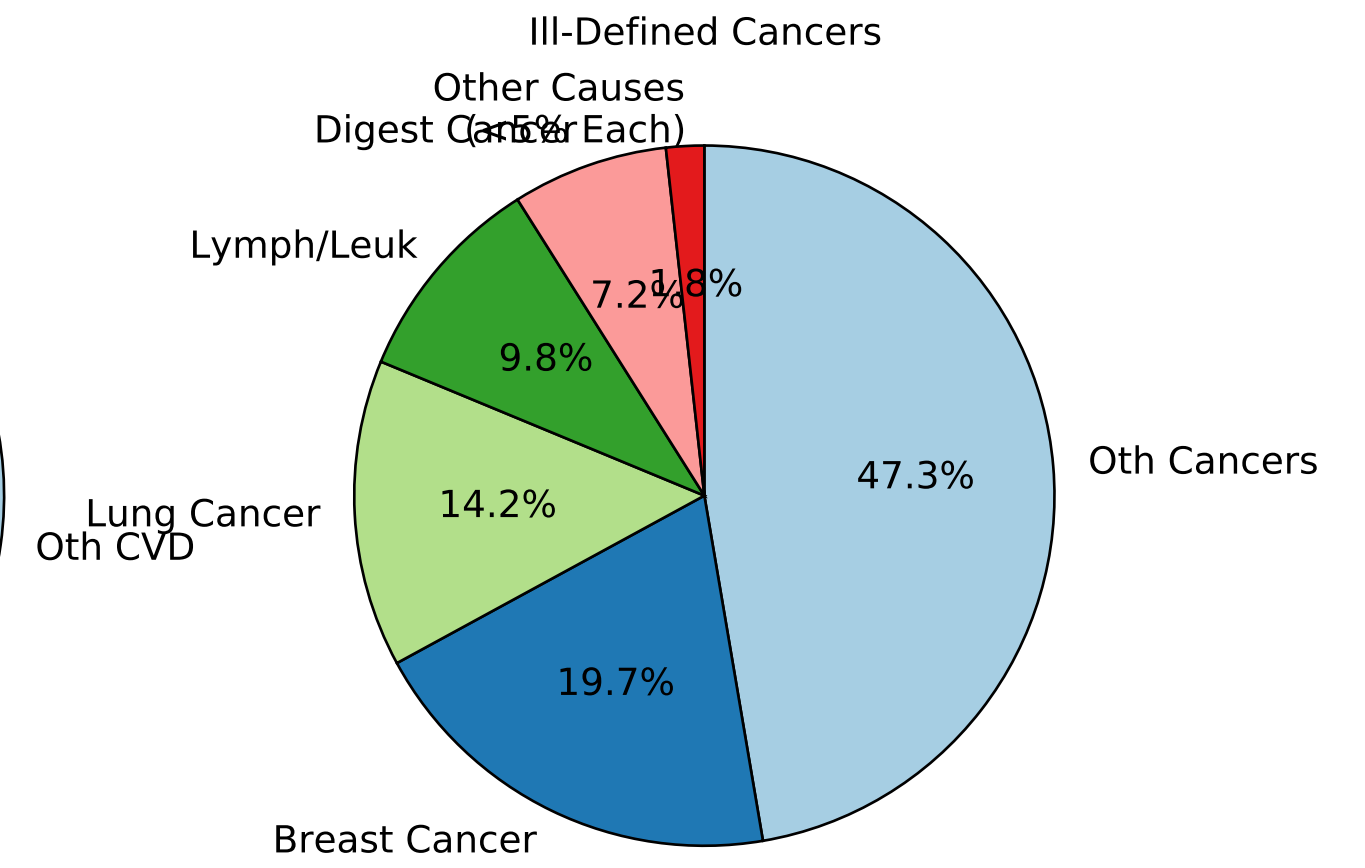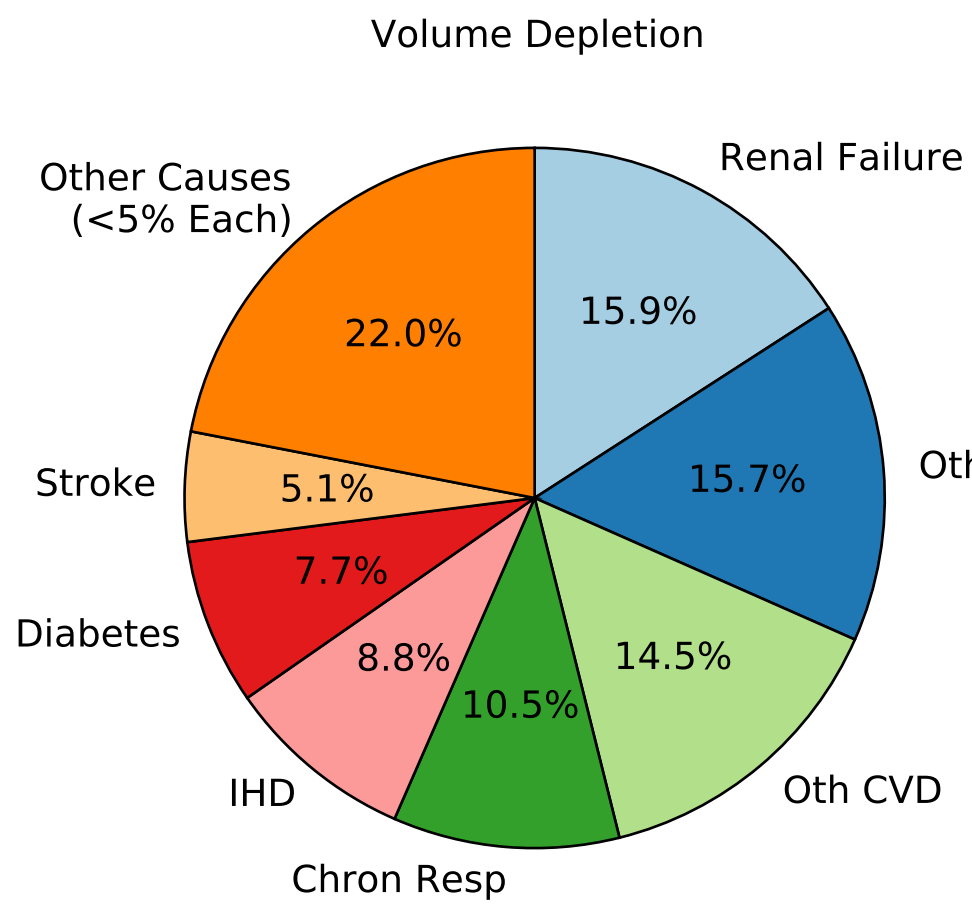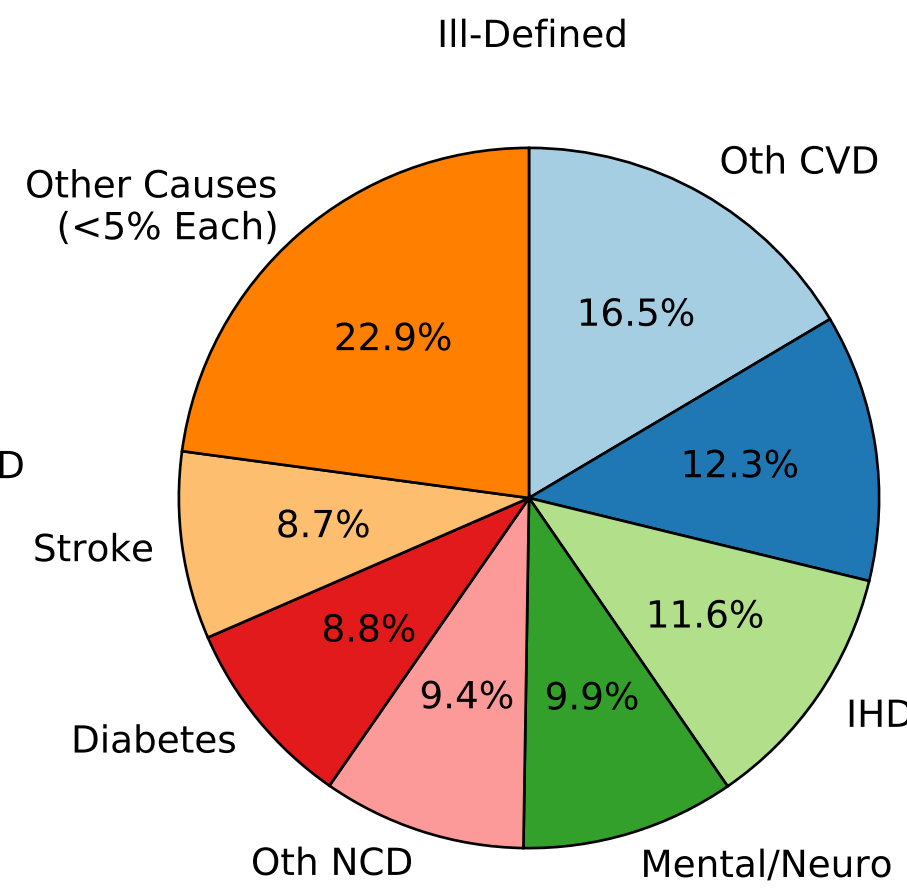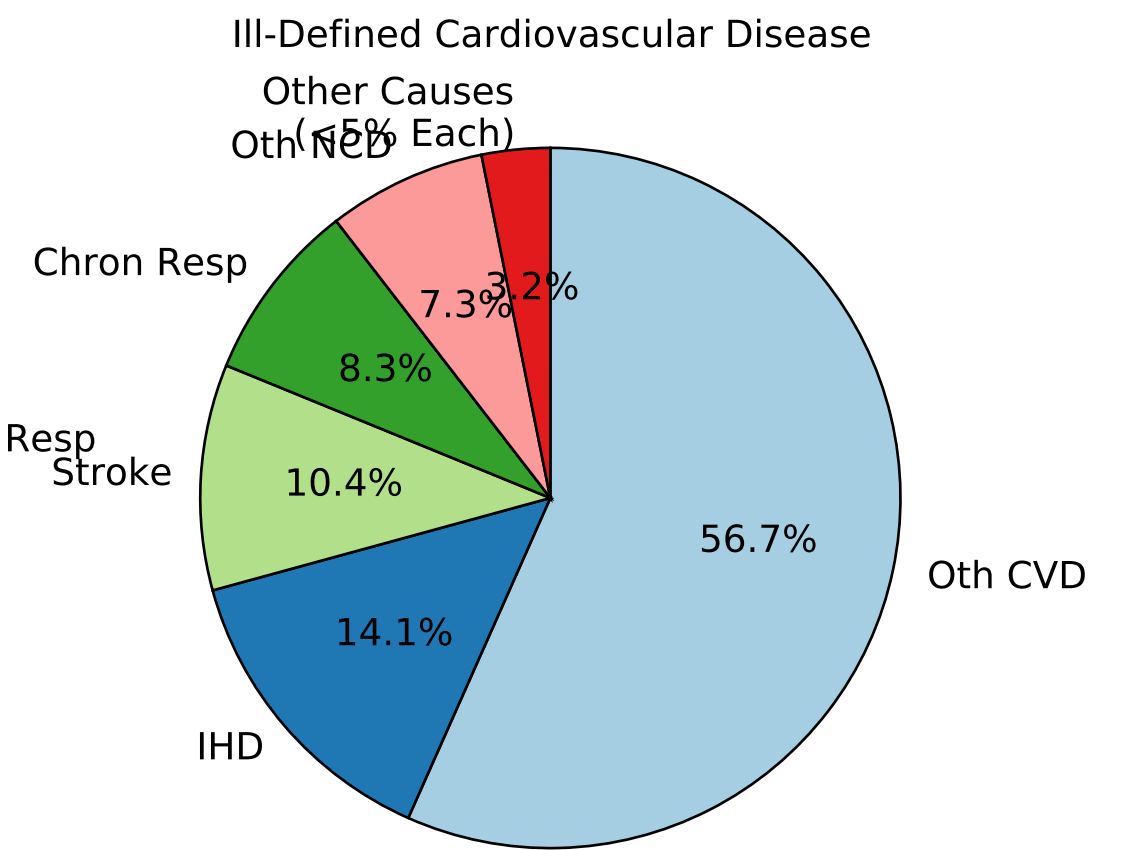

Ill-Defined Injury

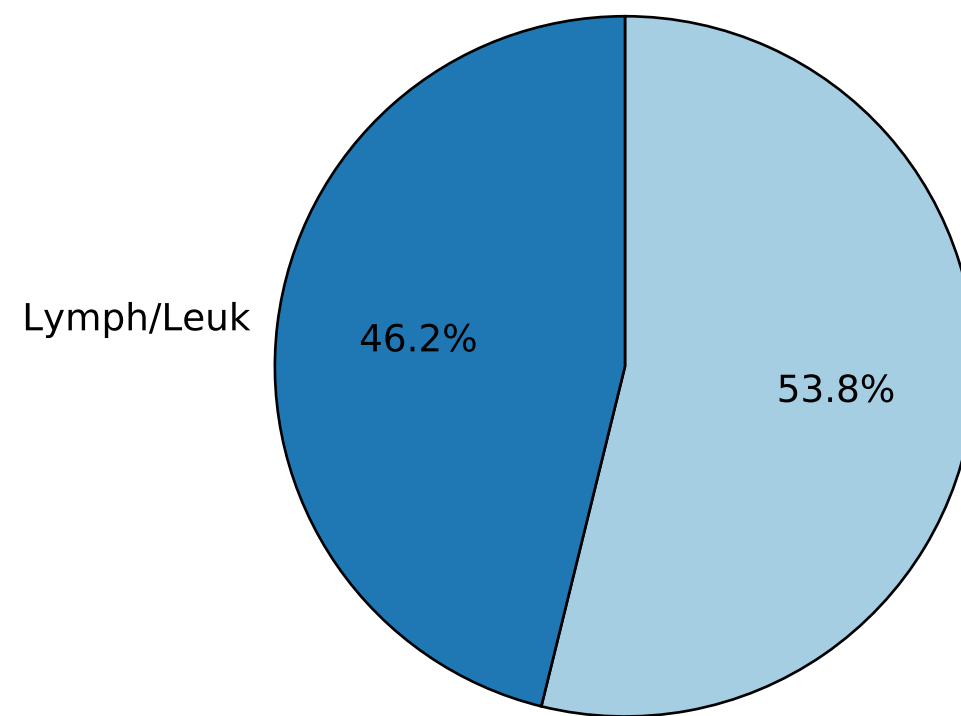

Injury of Undetermined Intent

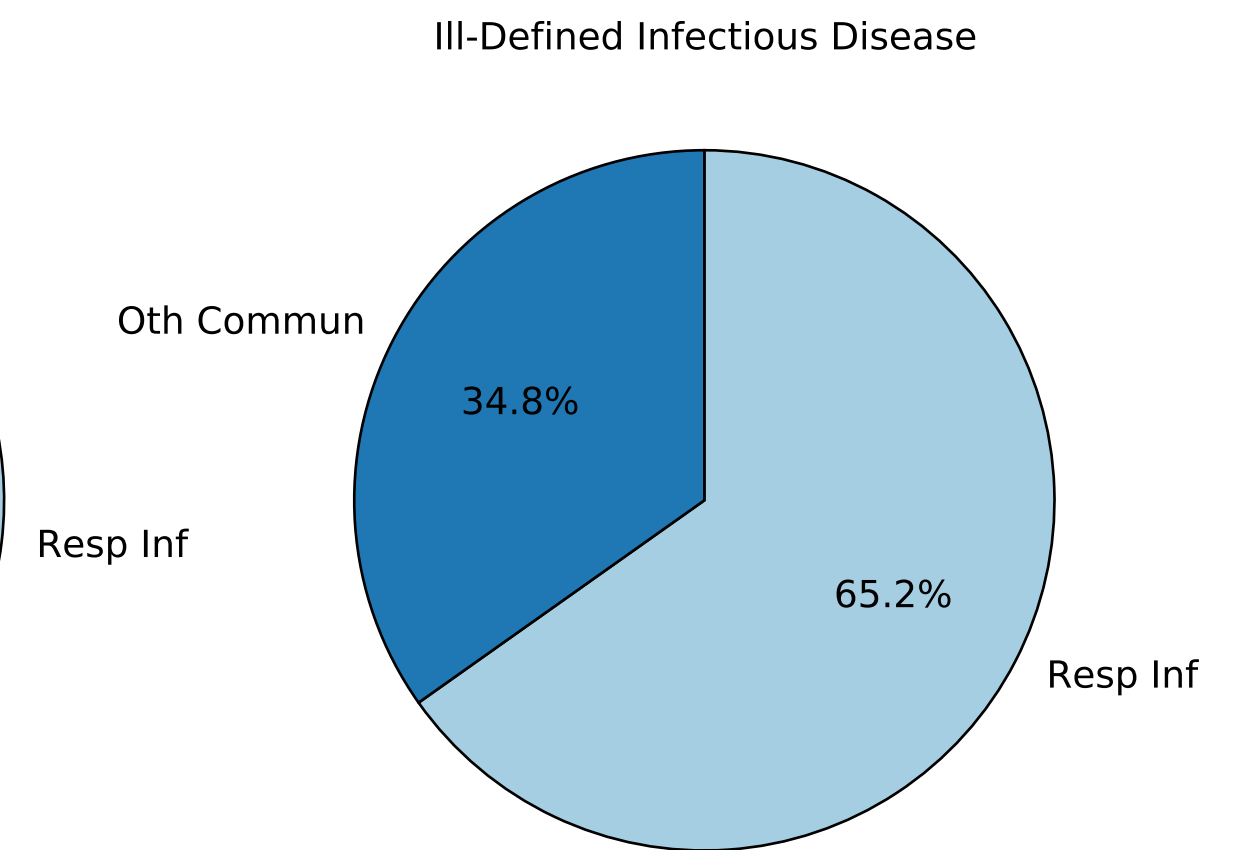

Ill-Defined Infectious Disease

ICD 10  
Female, Age 75

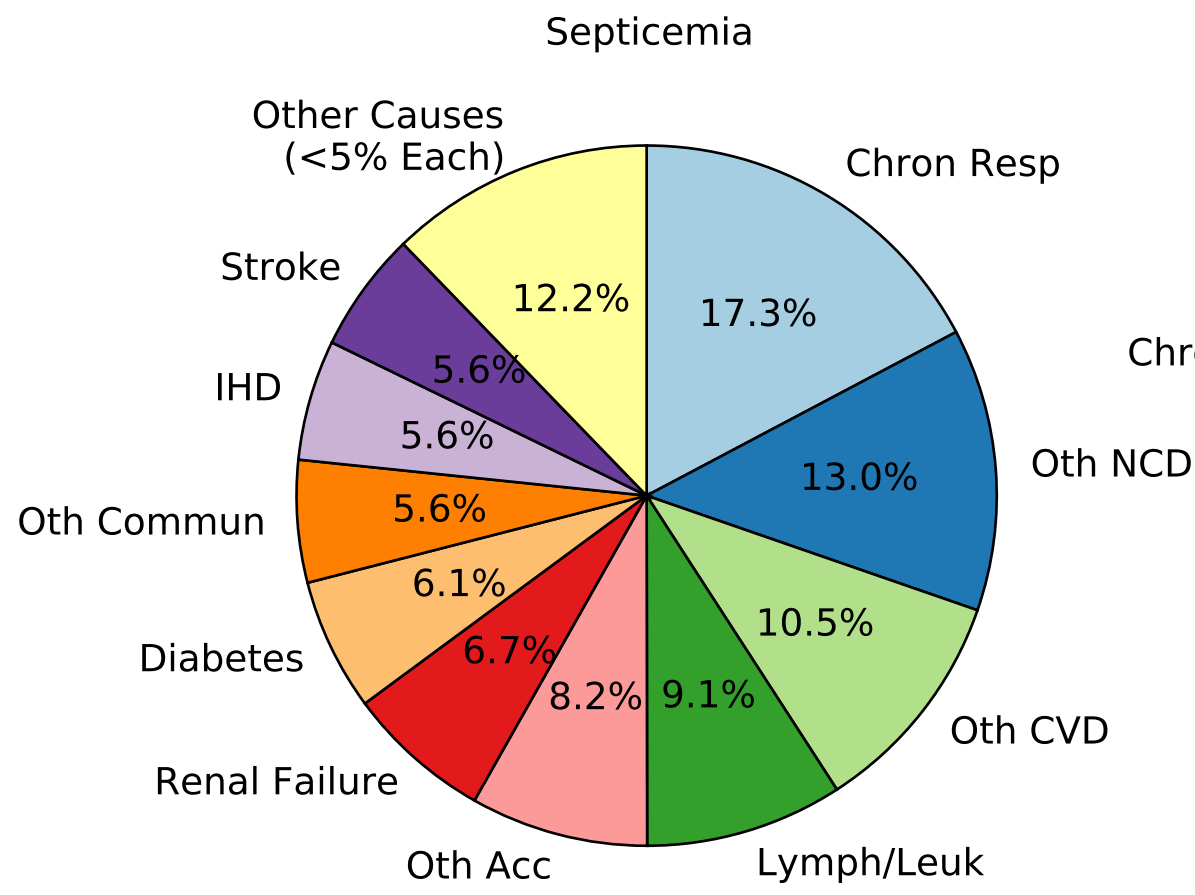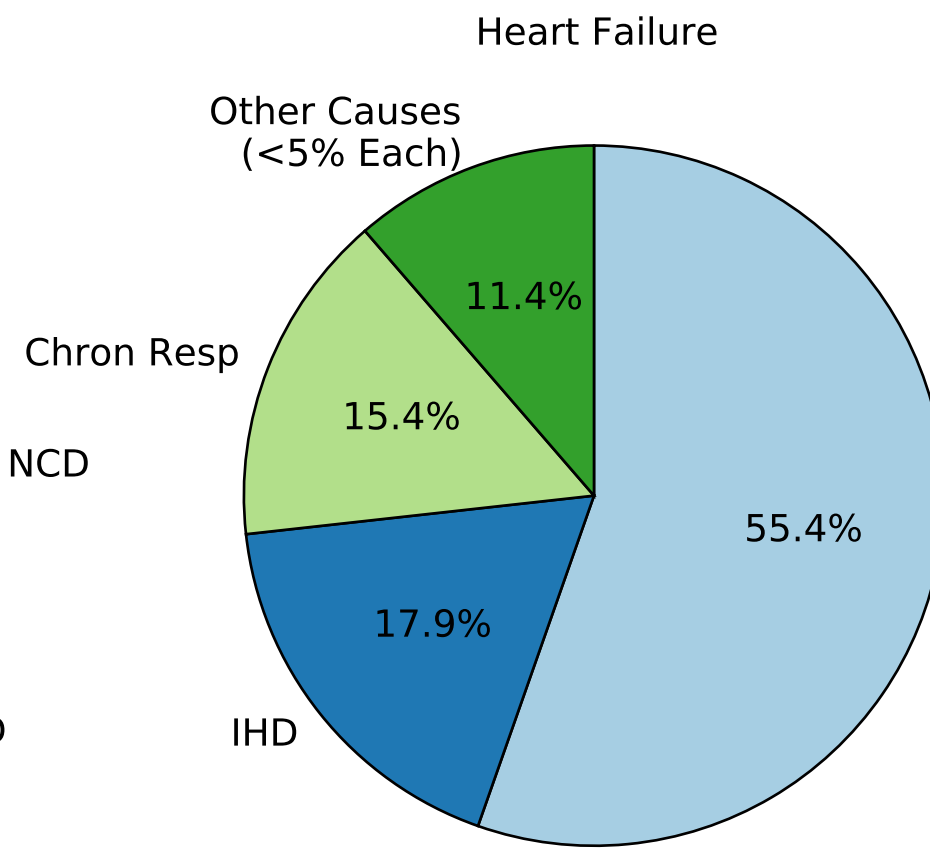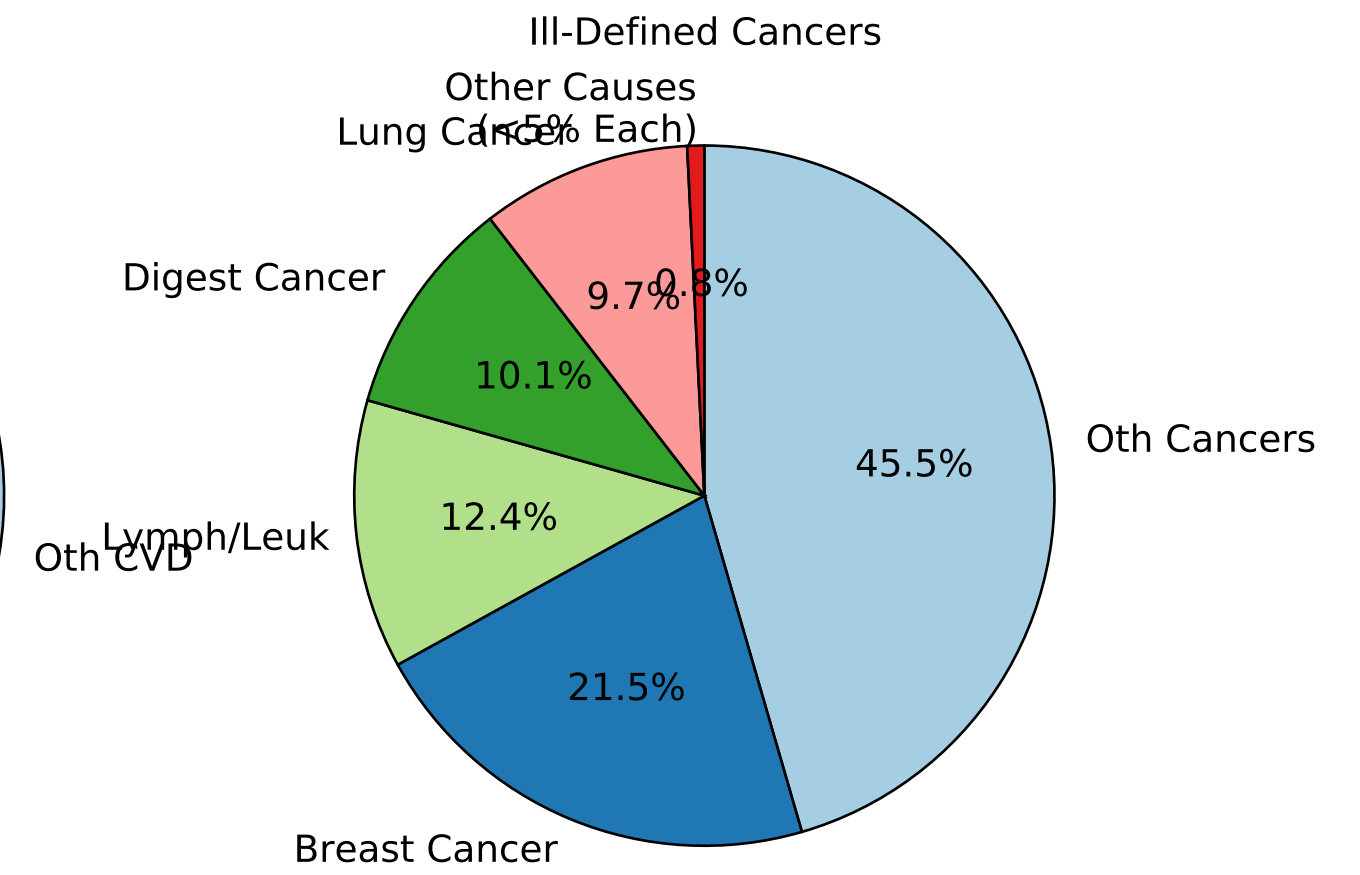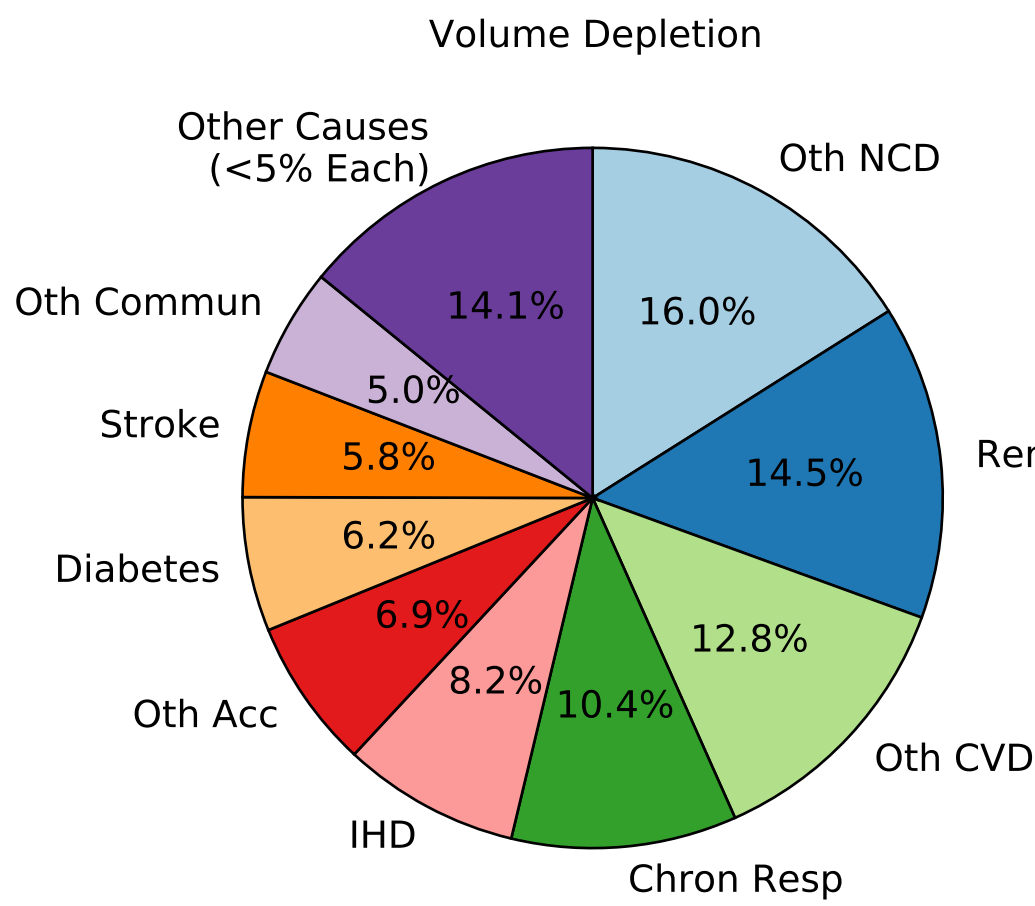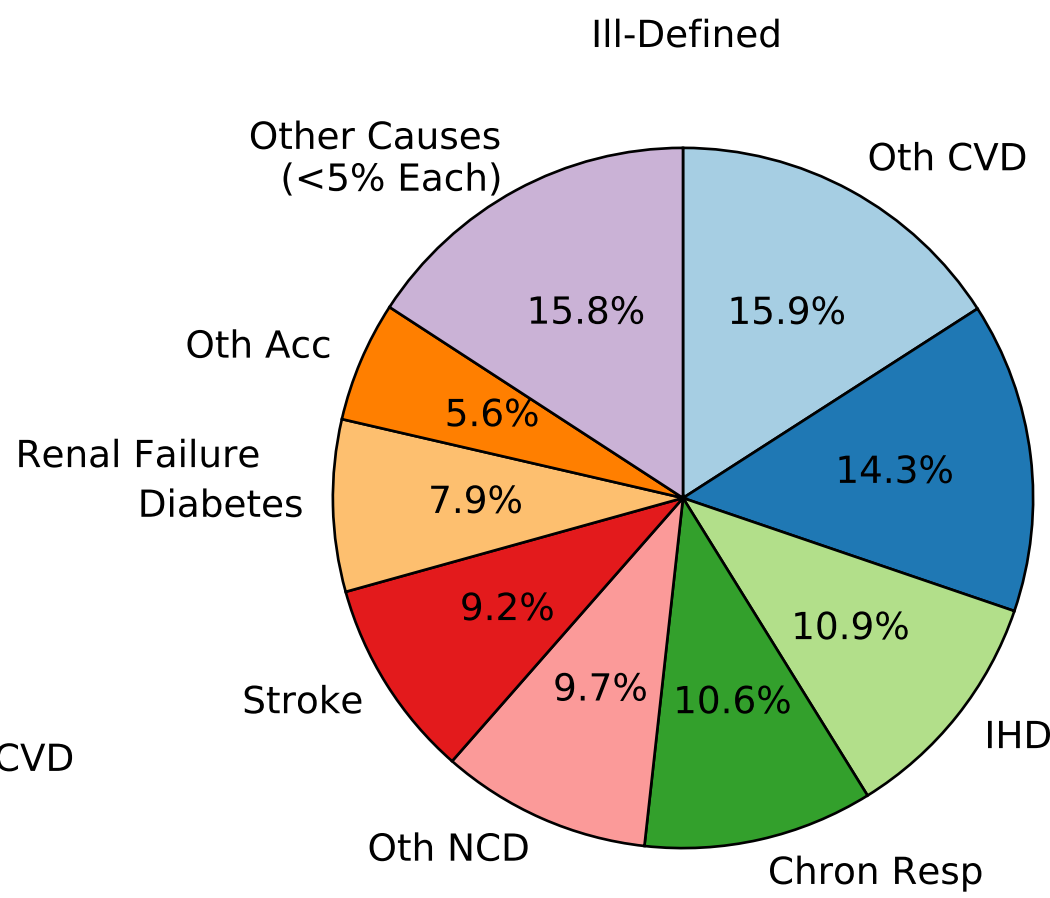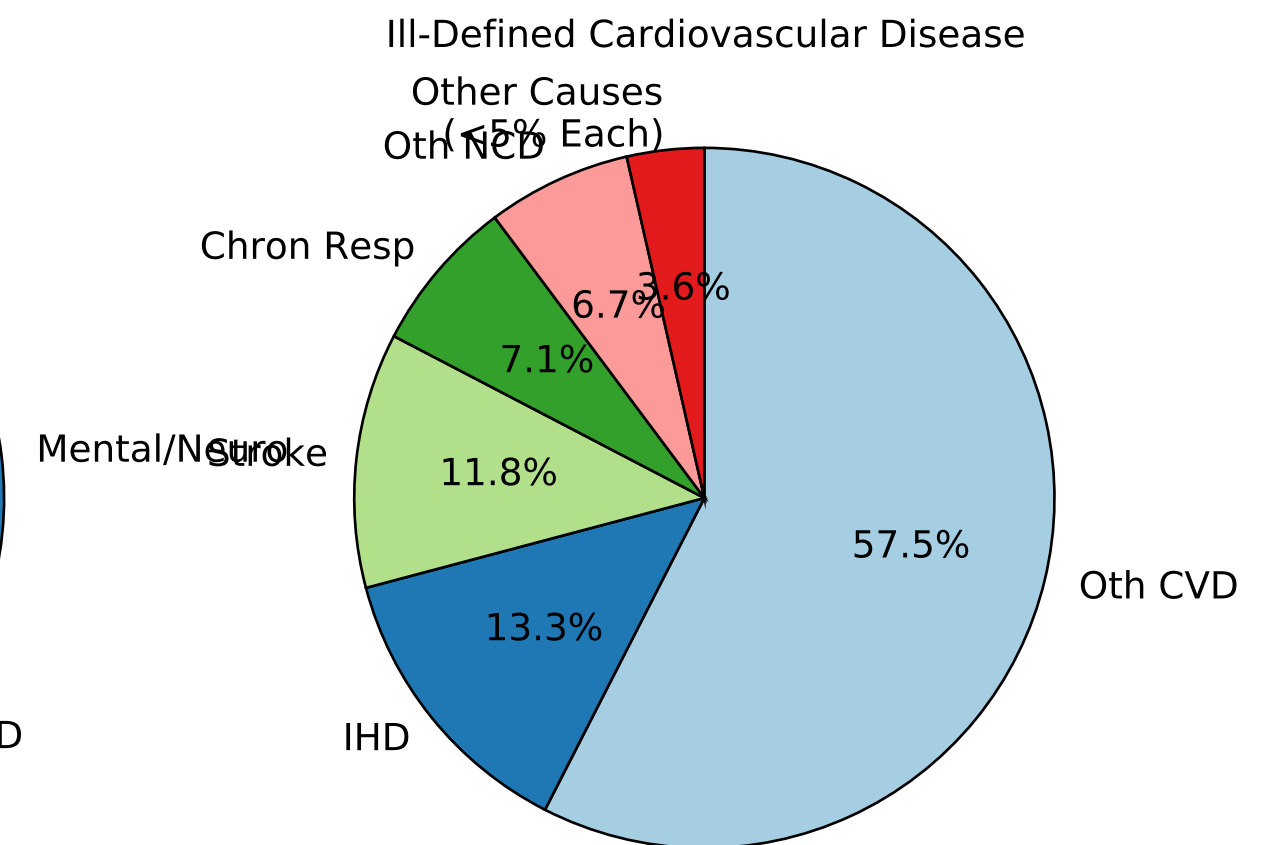

Ill-Defined Injury

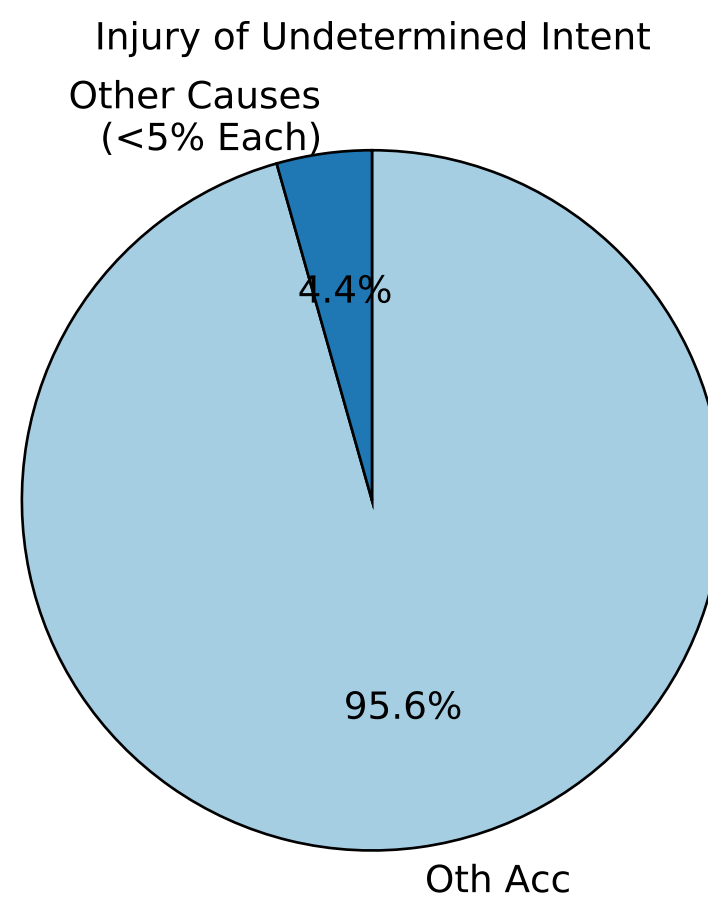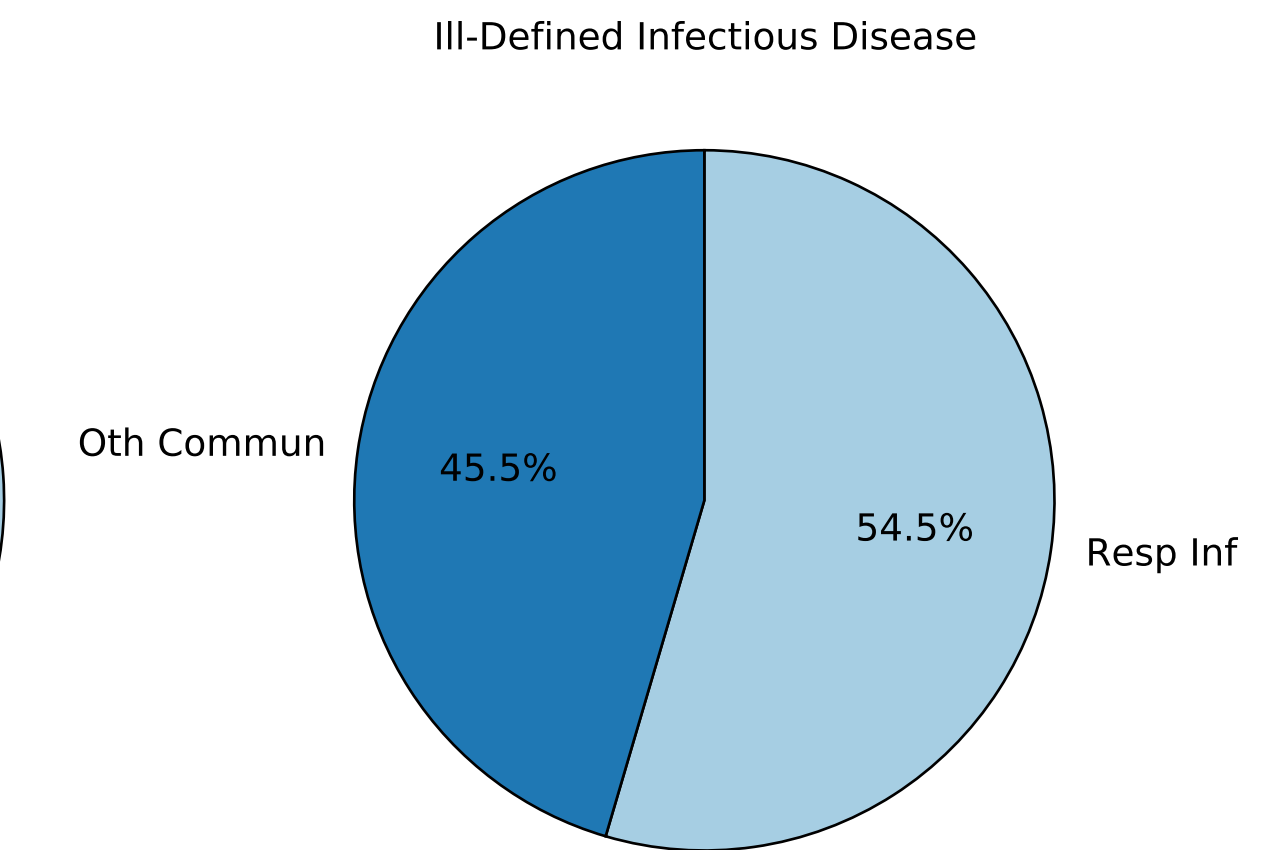

ICD 10  
Female, Age 80

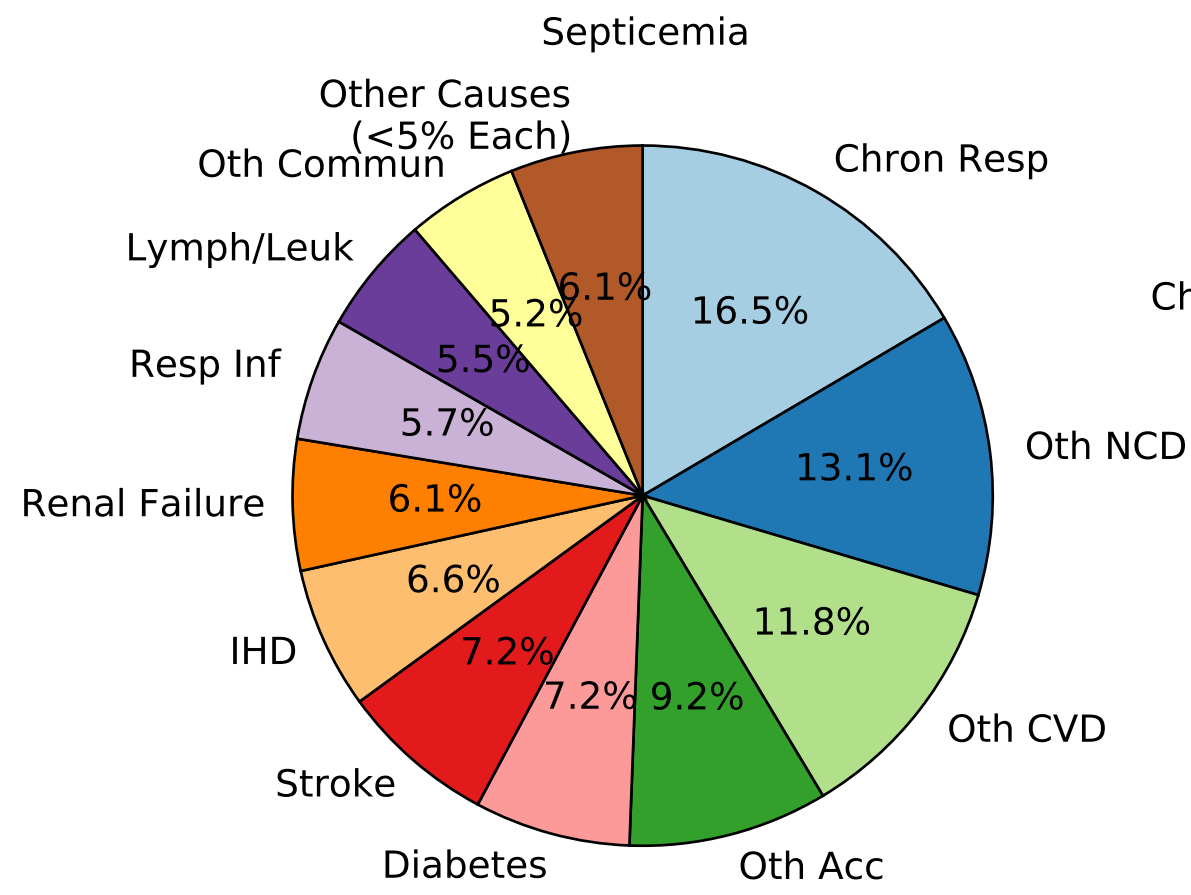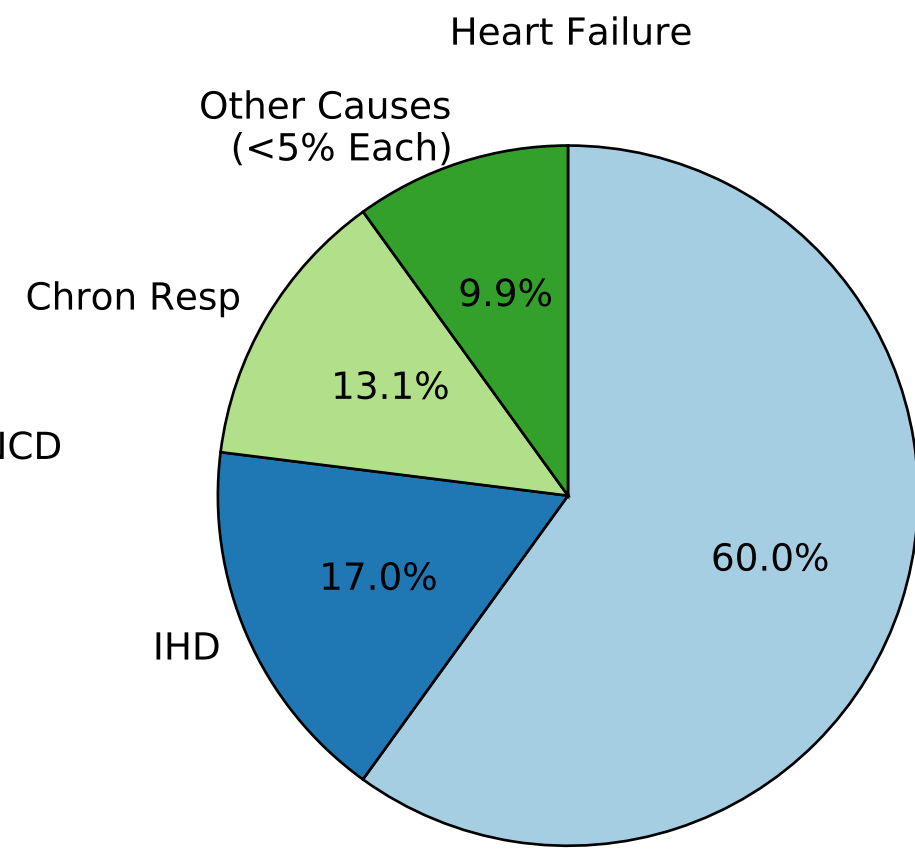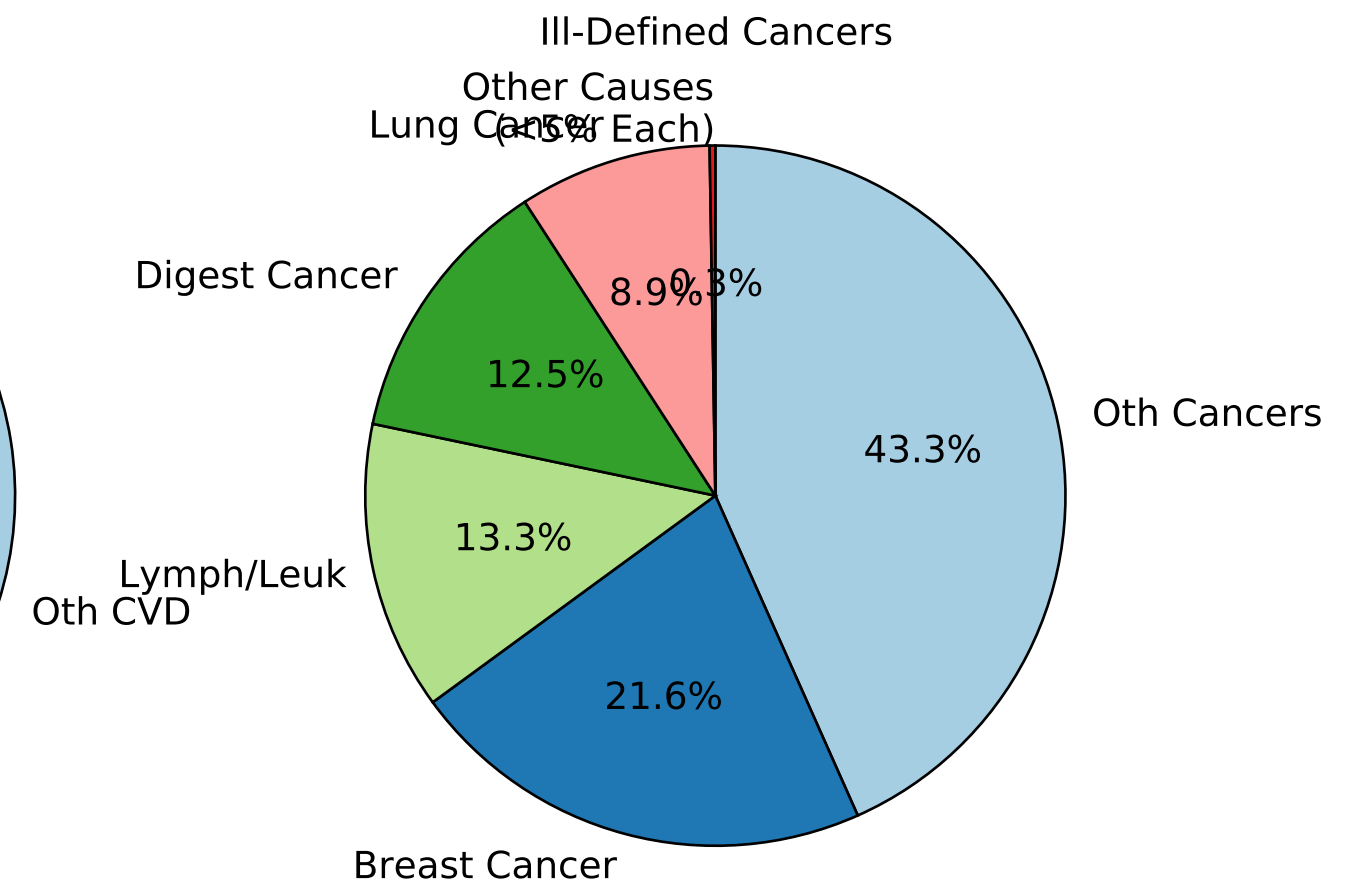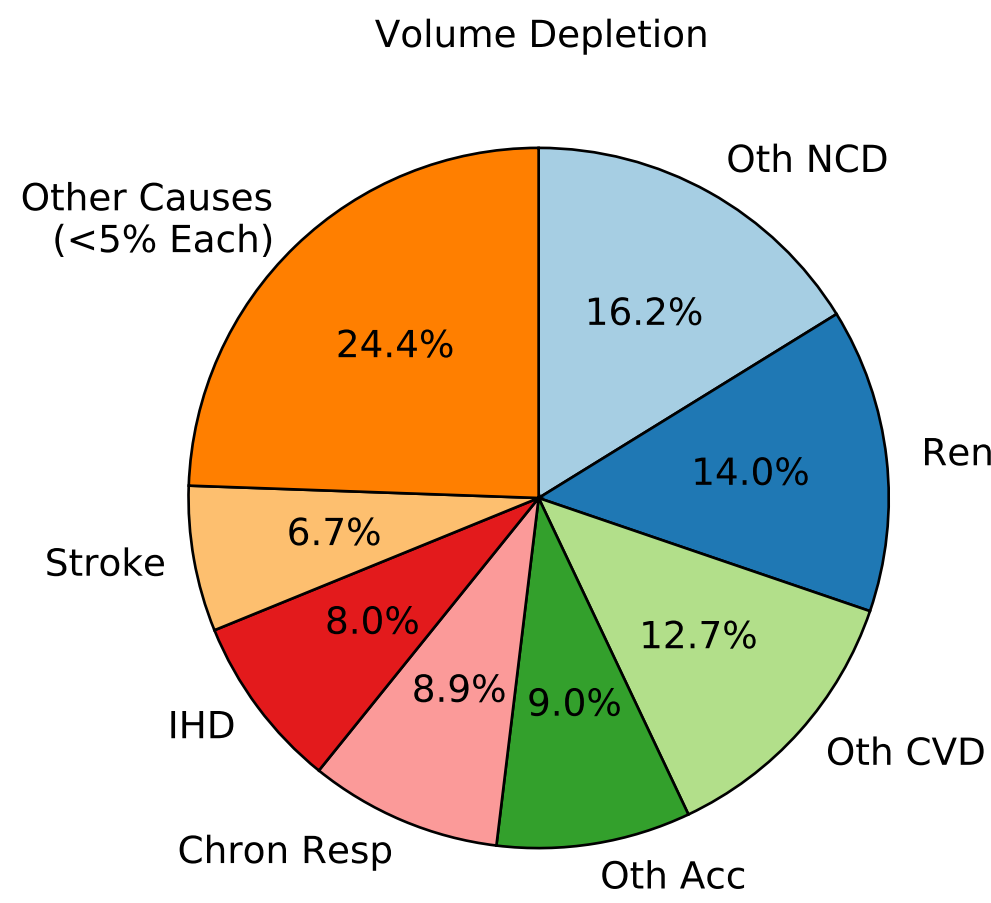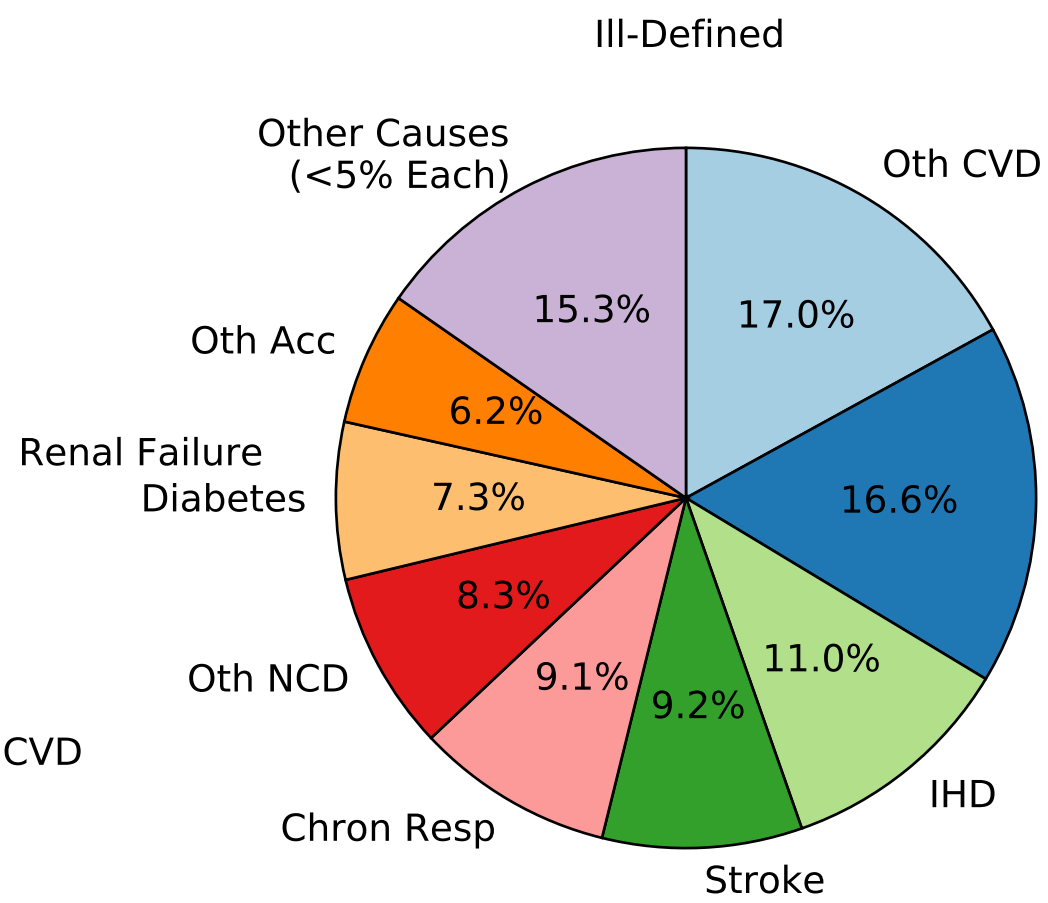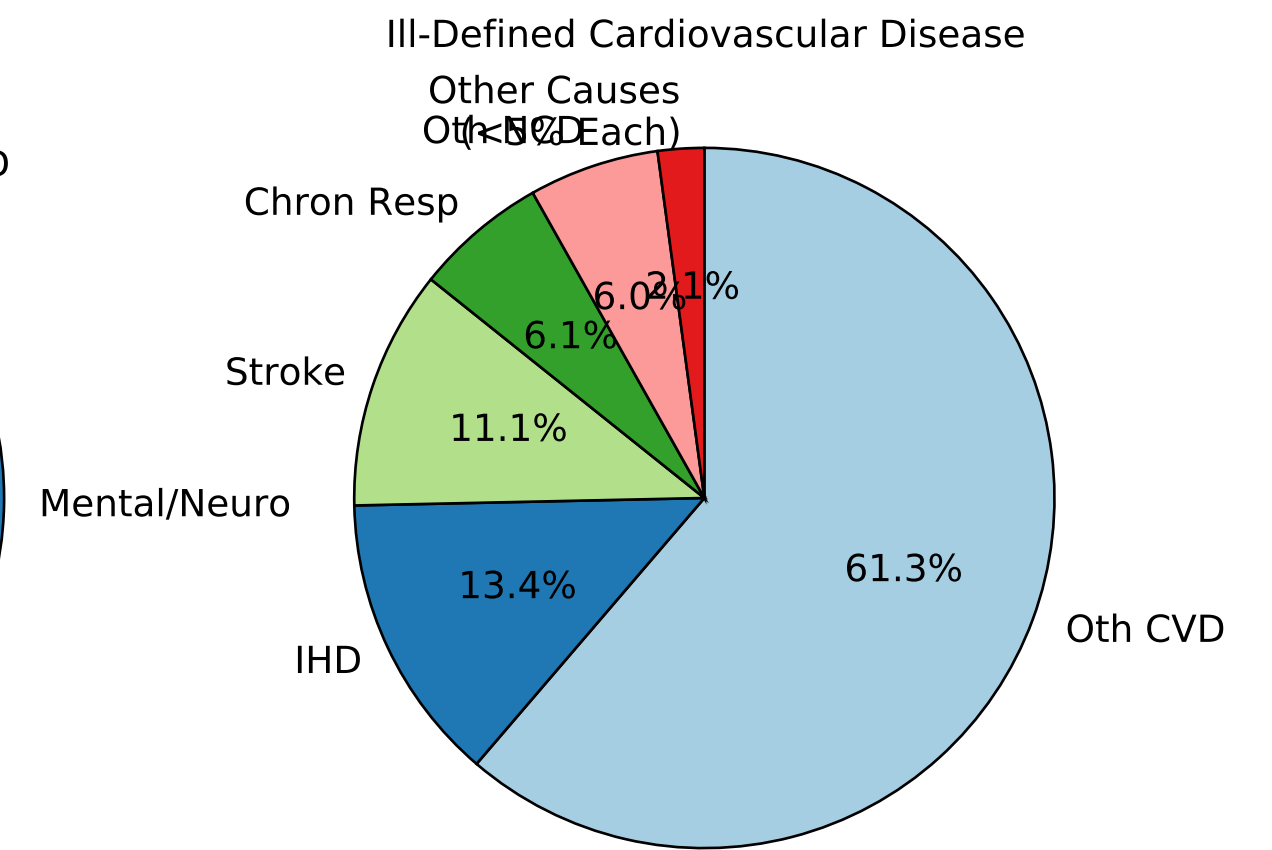

Ill-Defined Injury

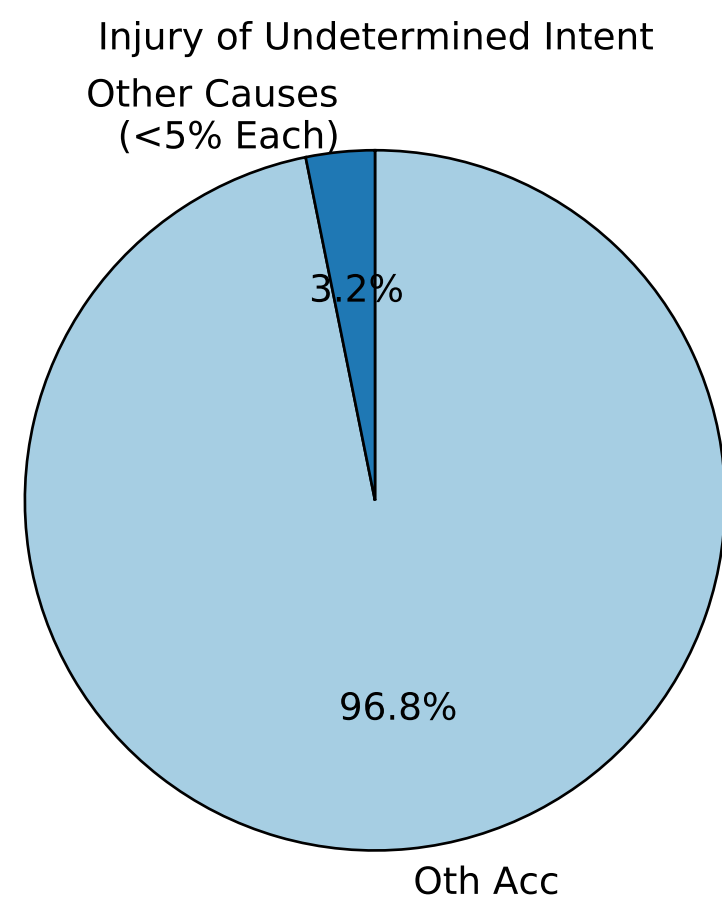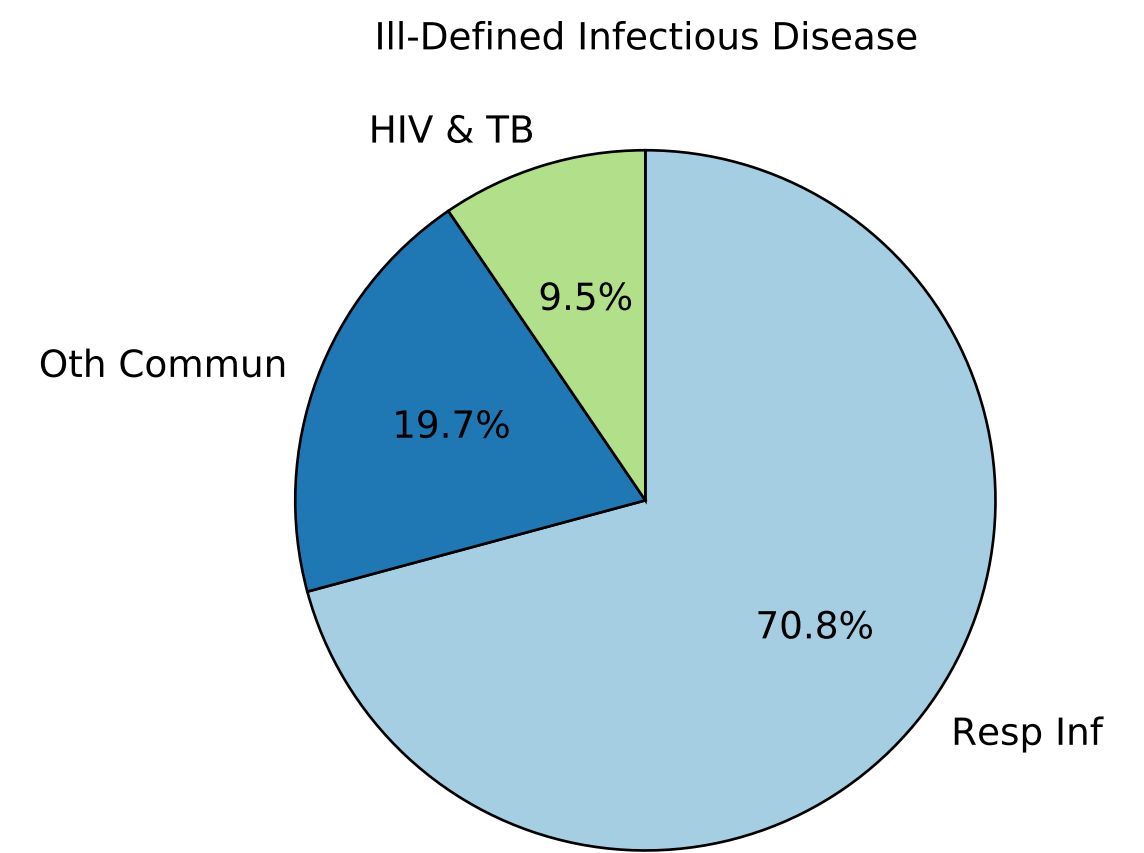

ICD 10  
Female, Age 85

Septicemia

Heart Failure

Ill-Defined Cancers

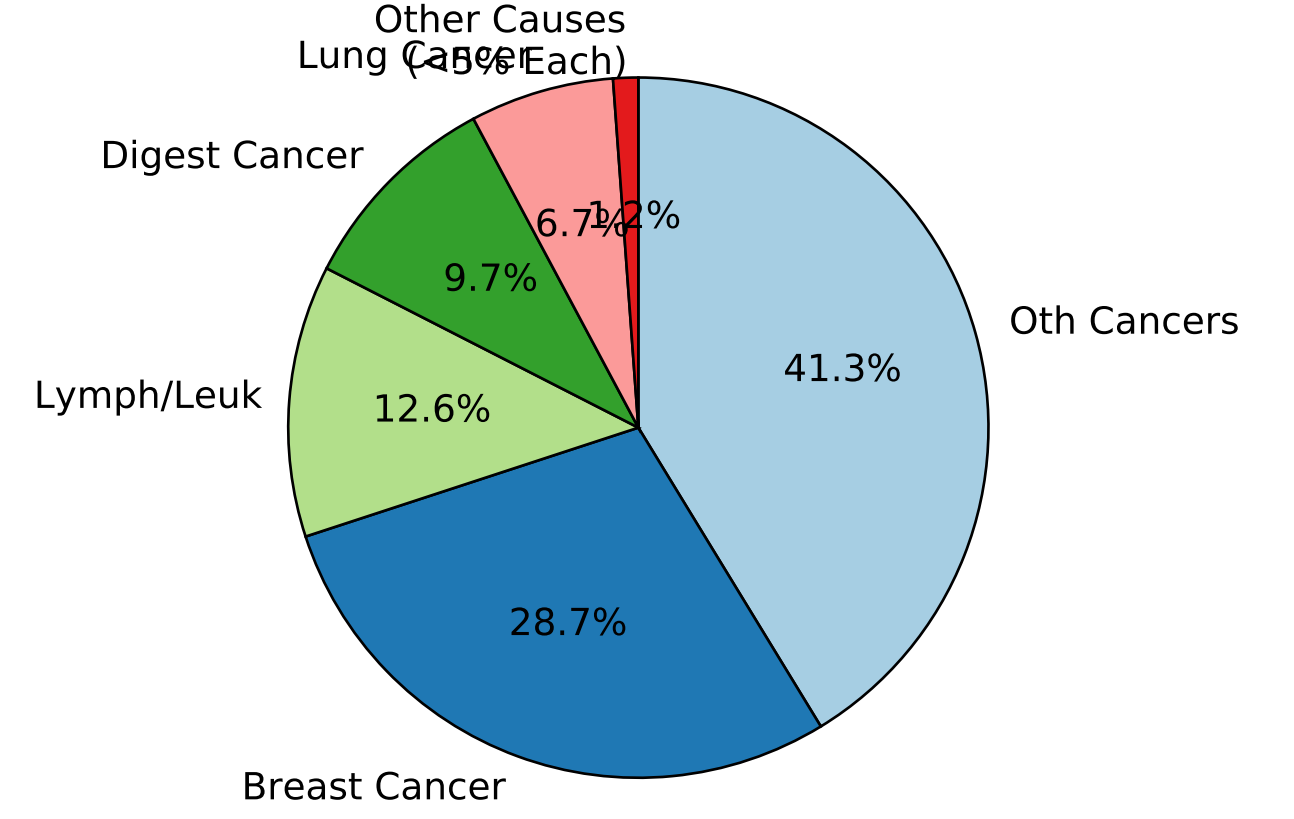

Volume Depletion

Ill-Defined

Ill-Defined Cardiovascular Disease

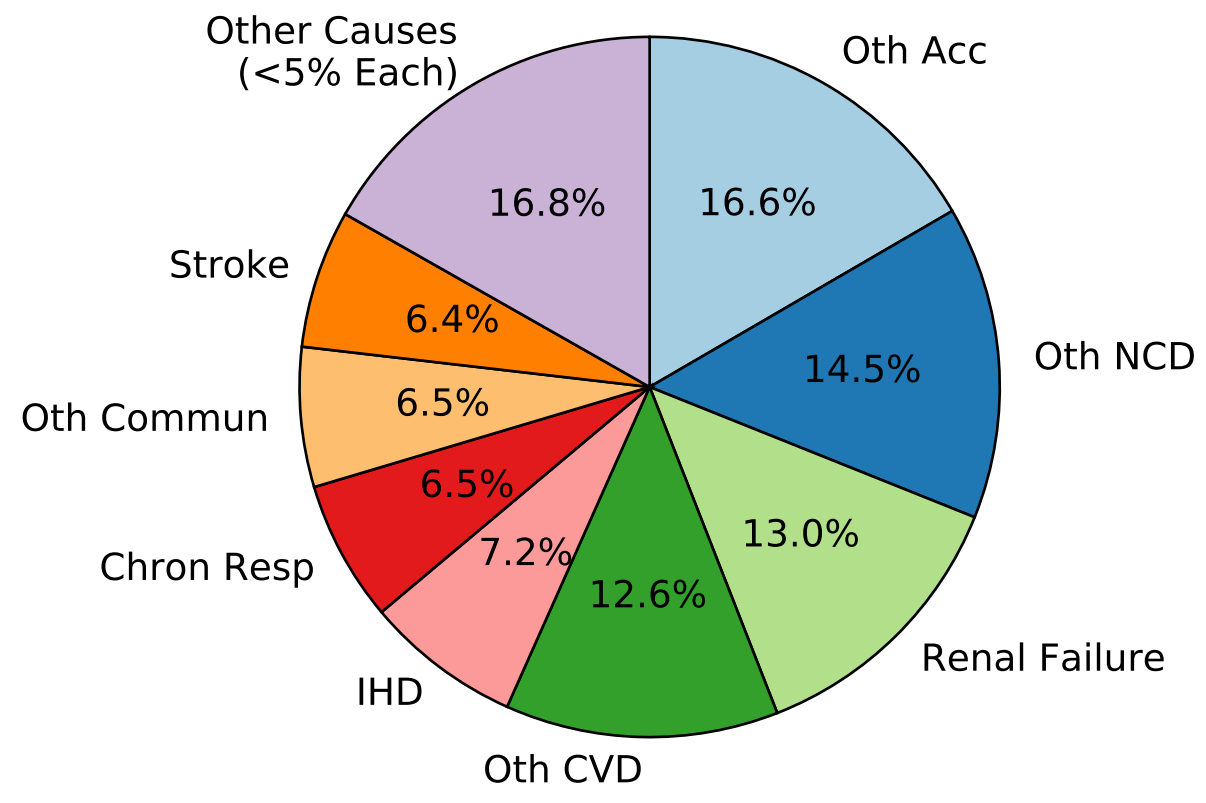

Ill-Defined Injury

Injury of Undetermined Intent

Ill-Defined Infectious Disease

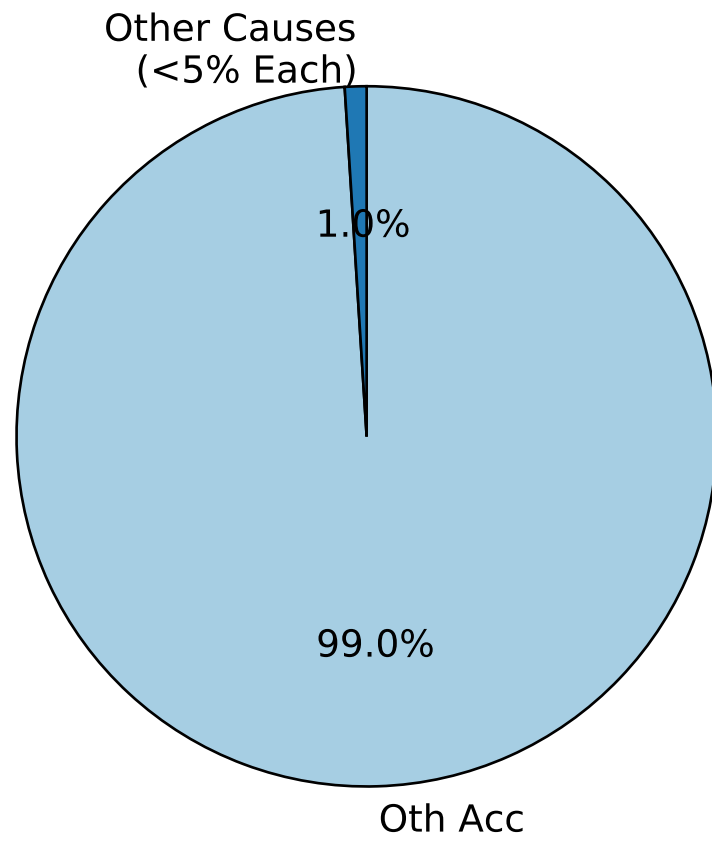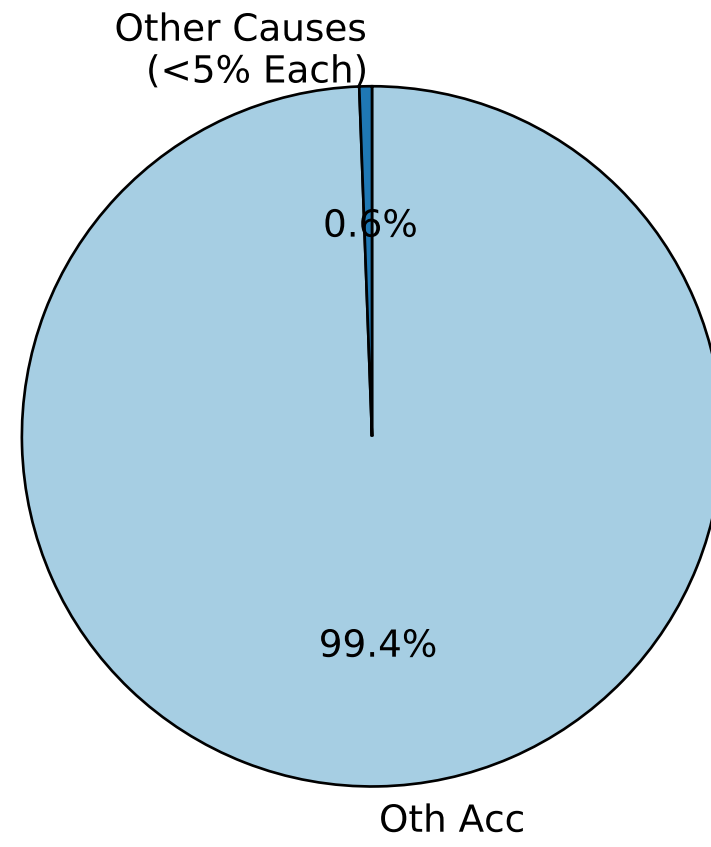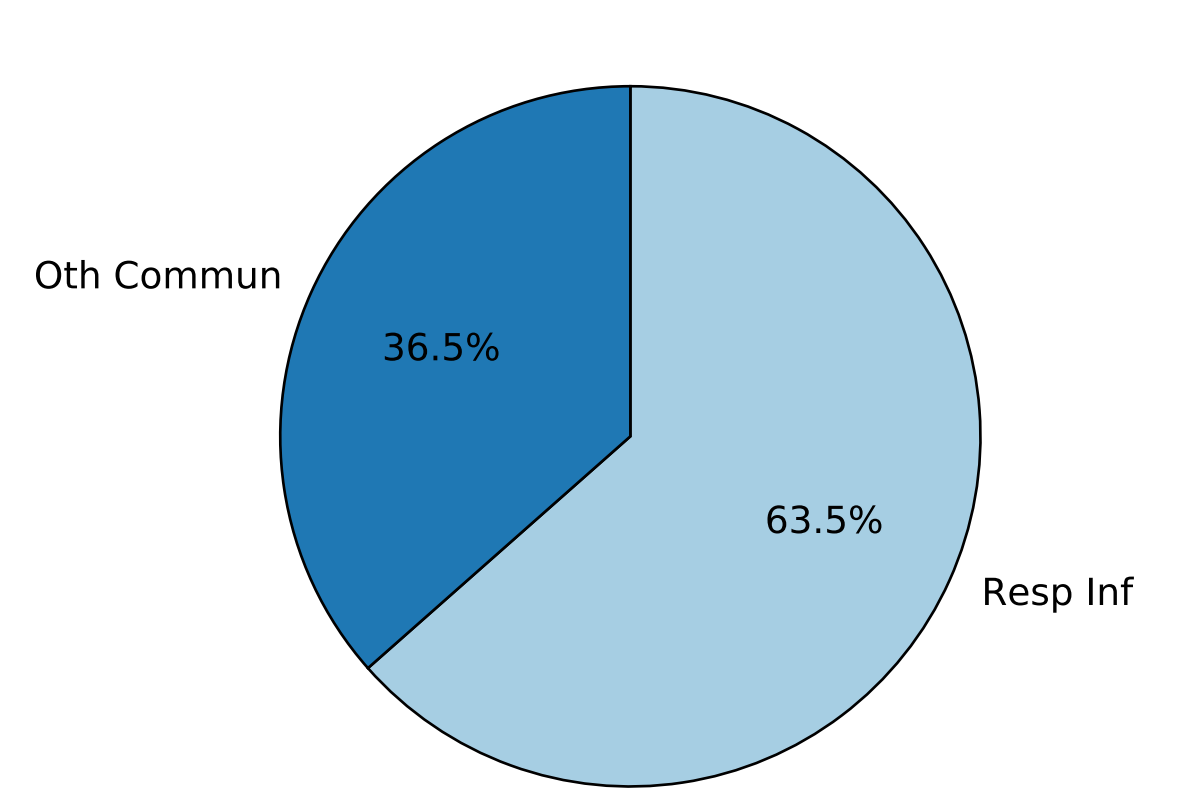

ICD 10  
Male, Age 0

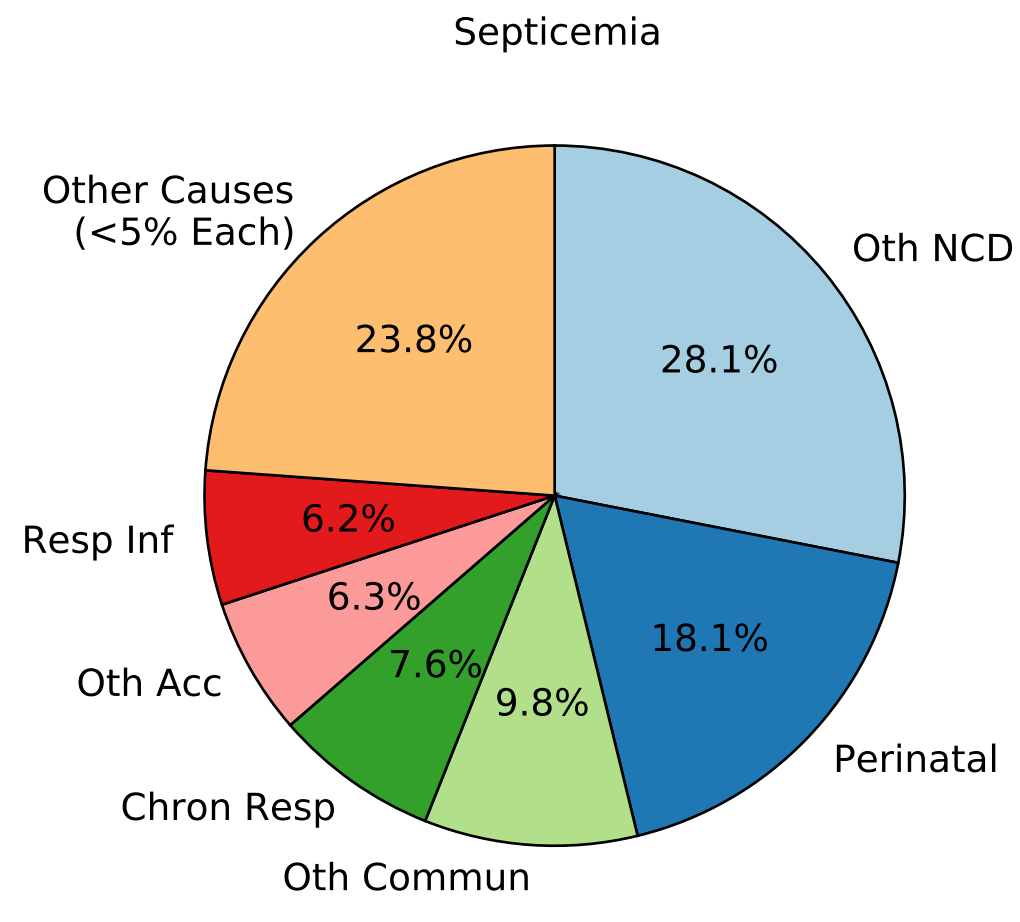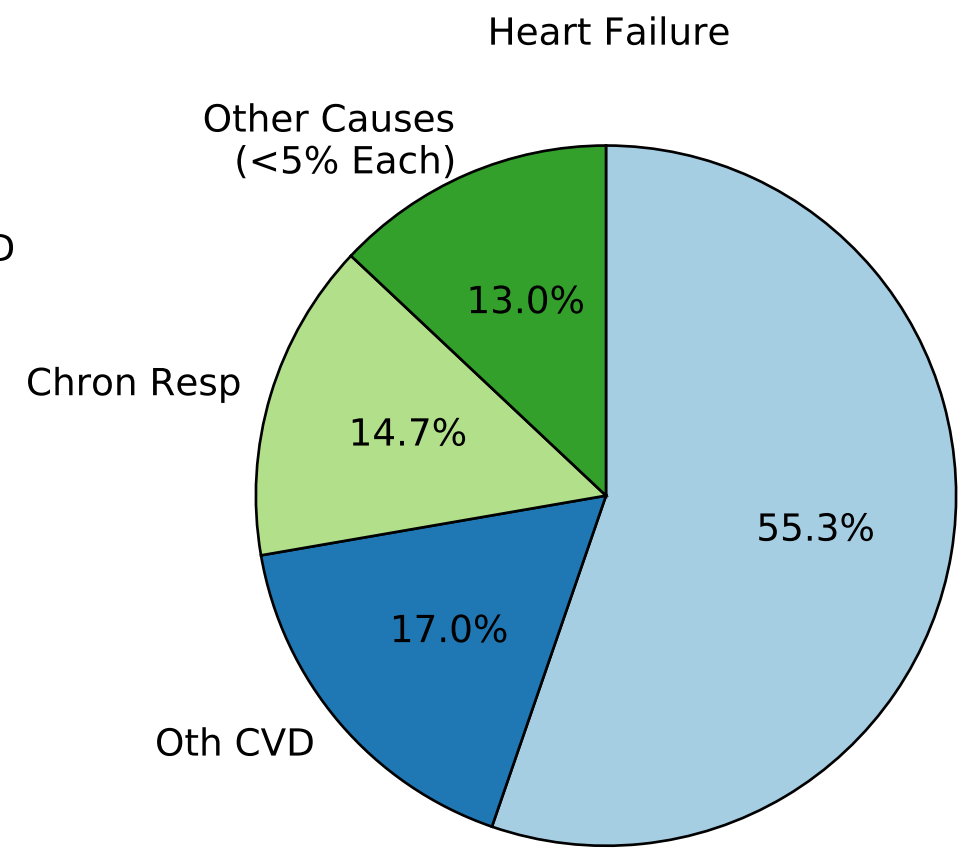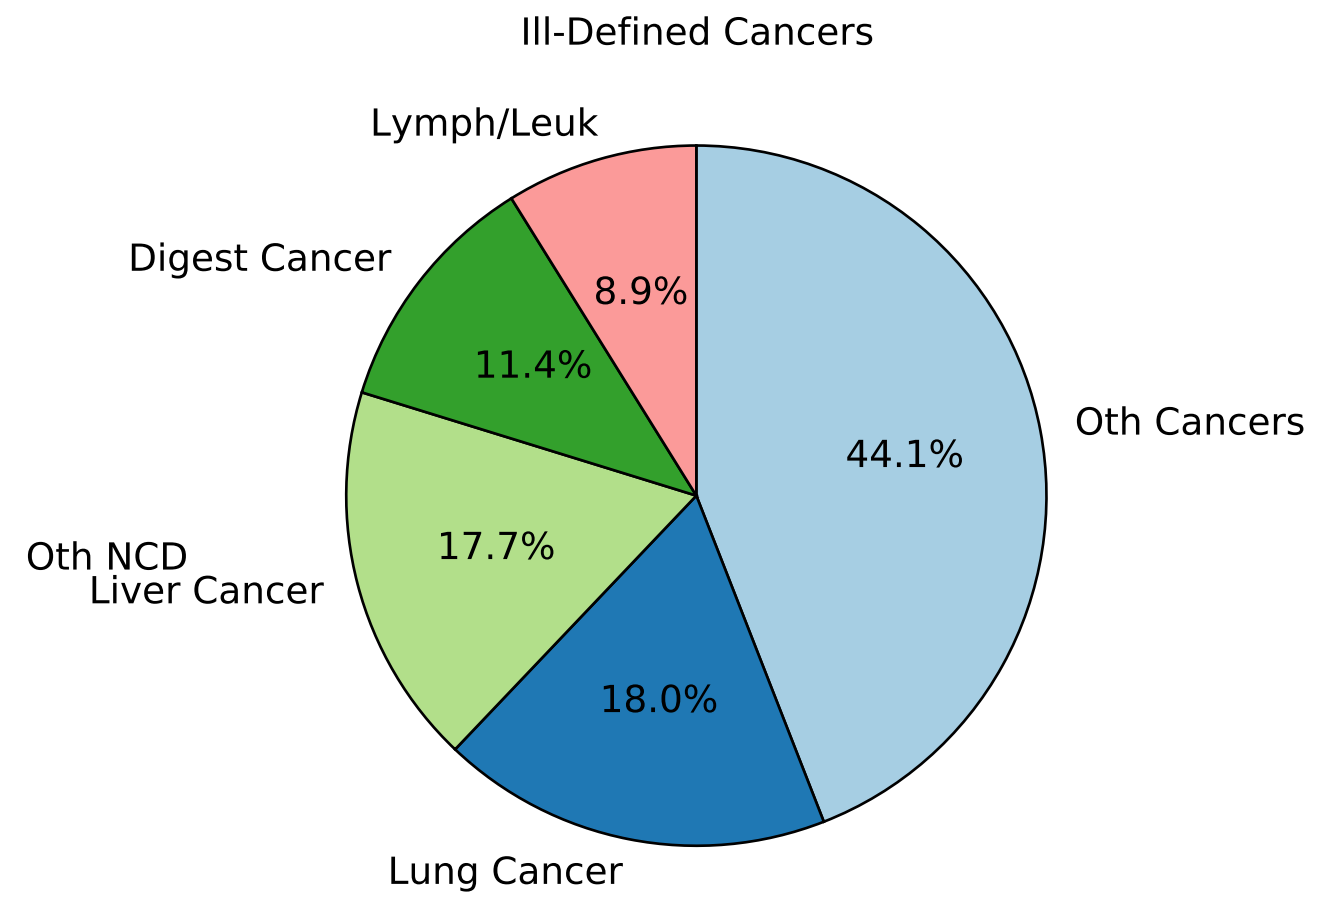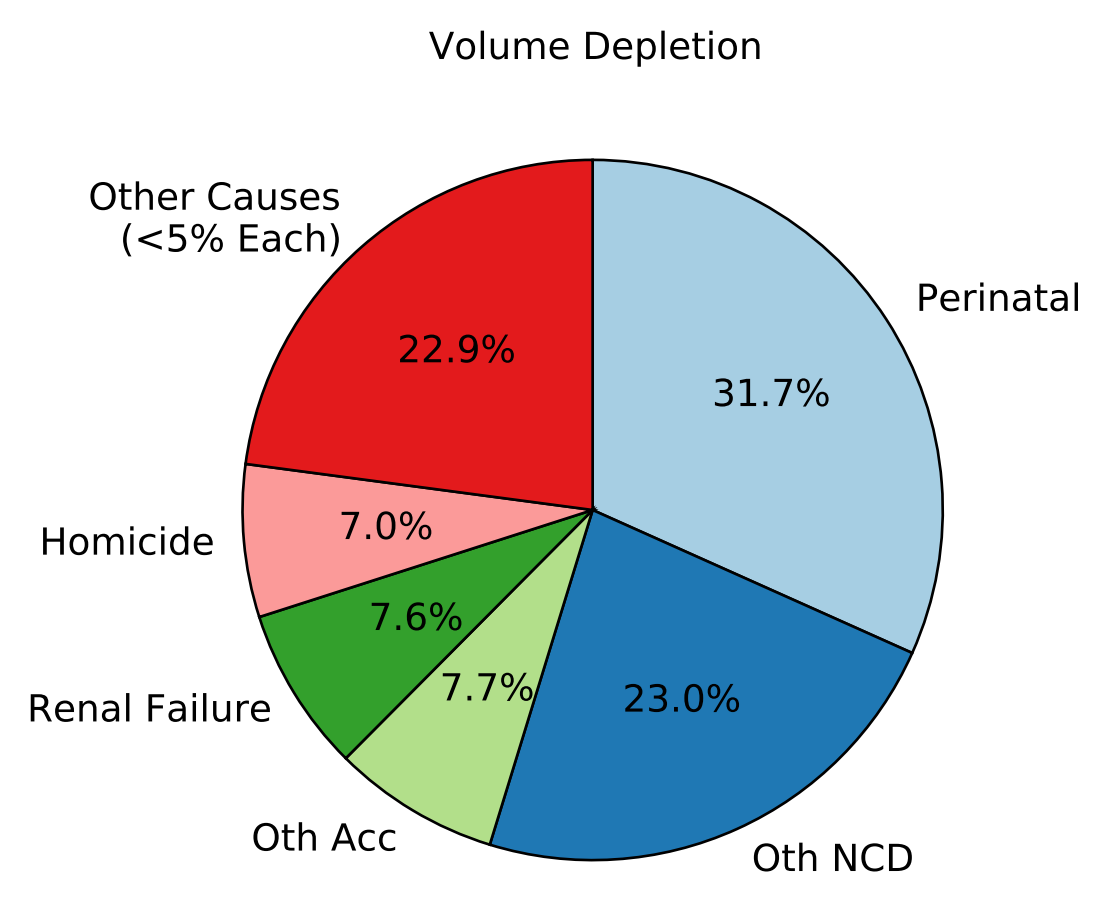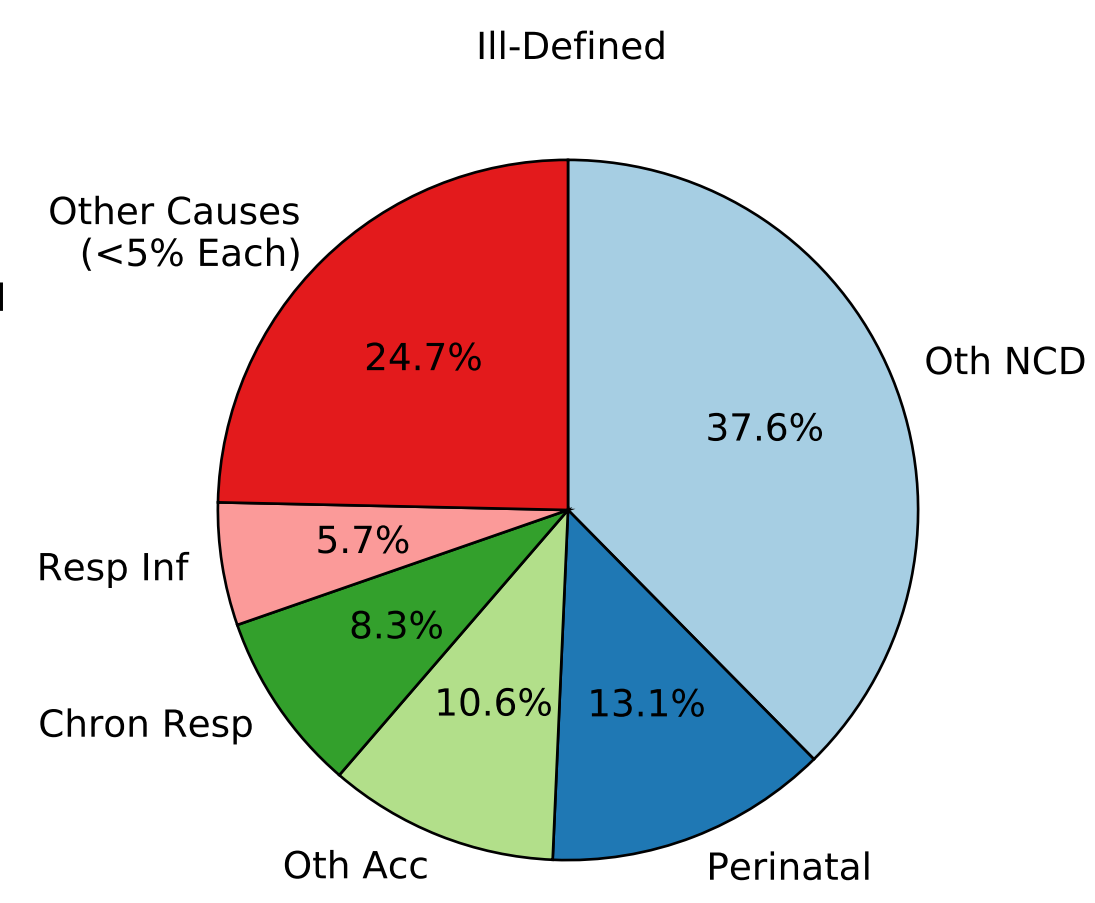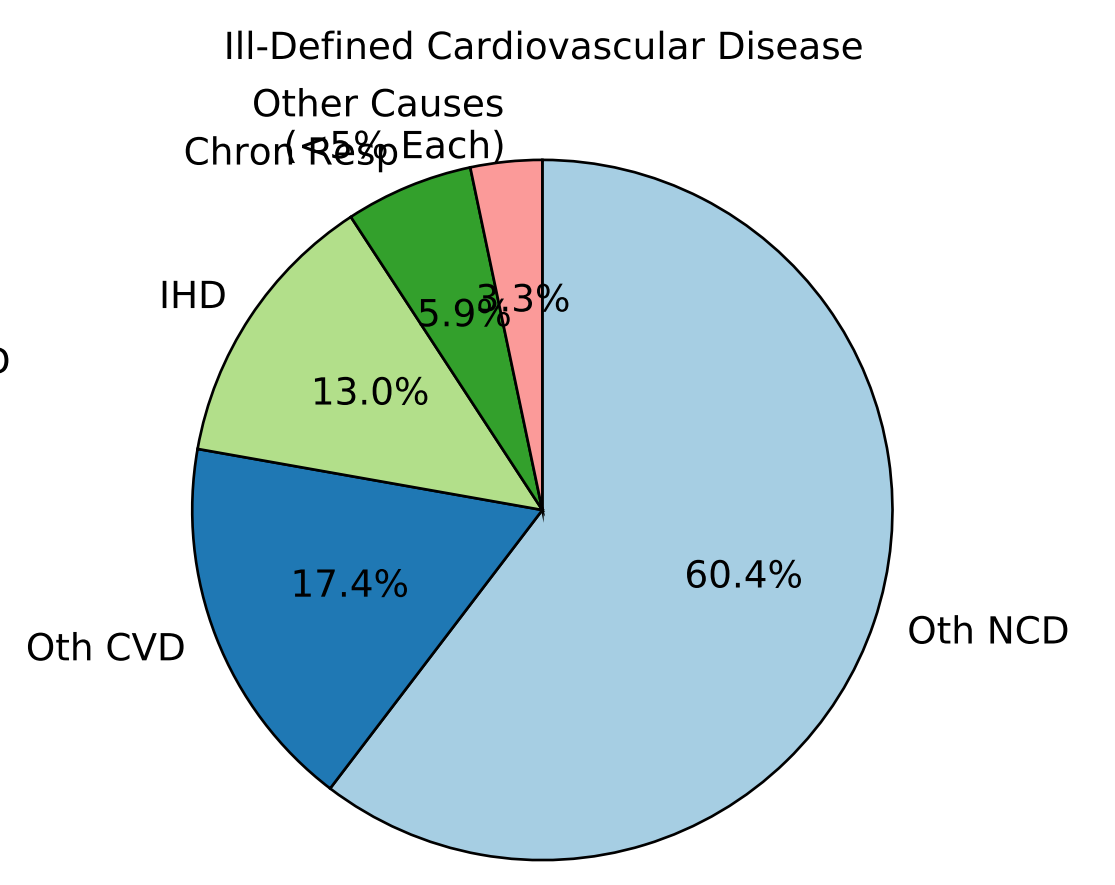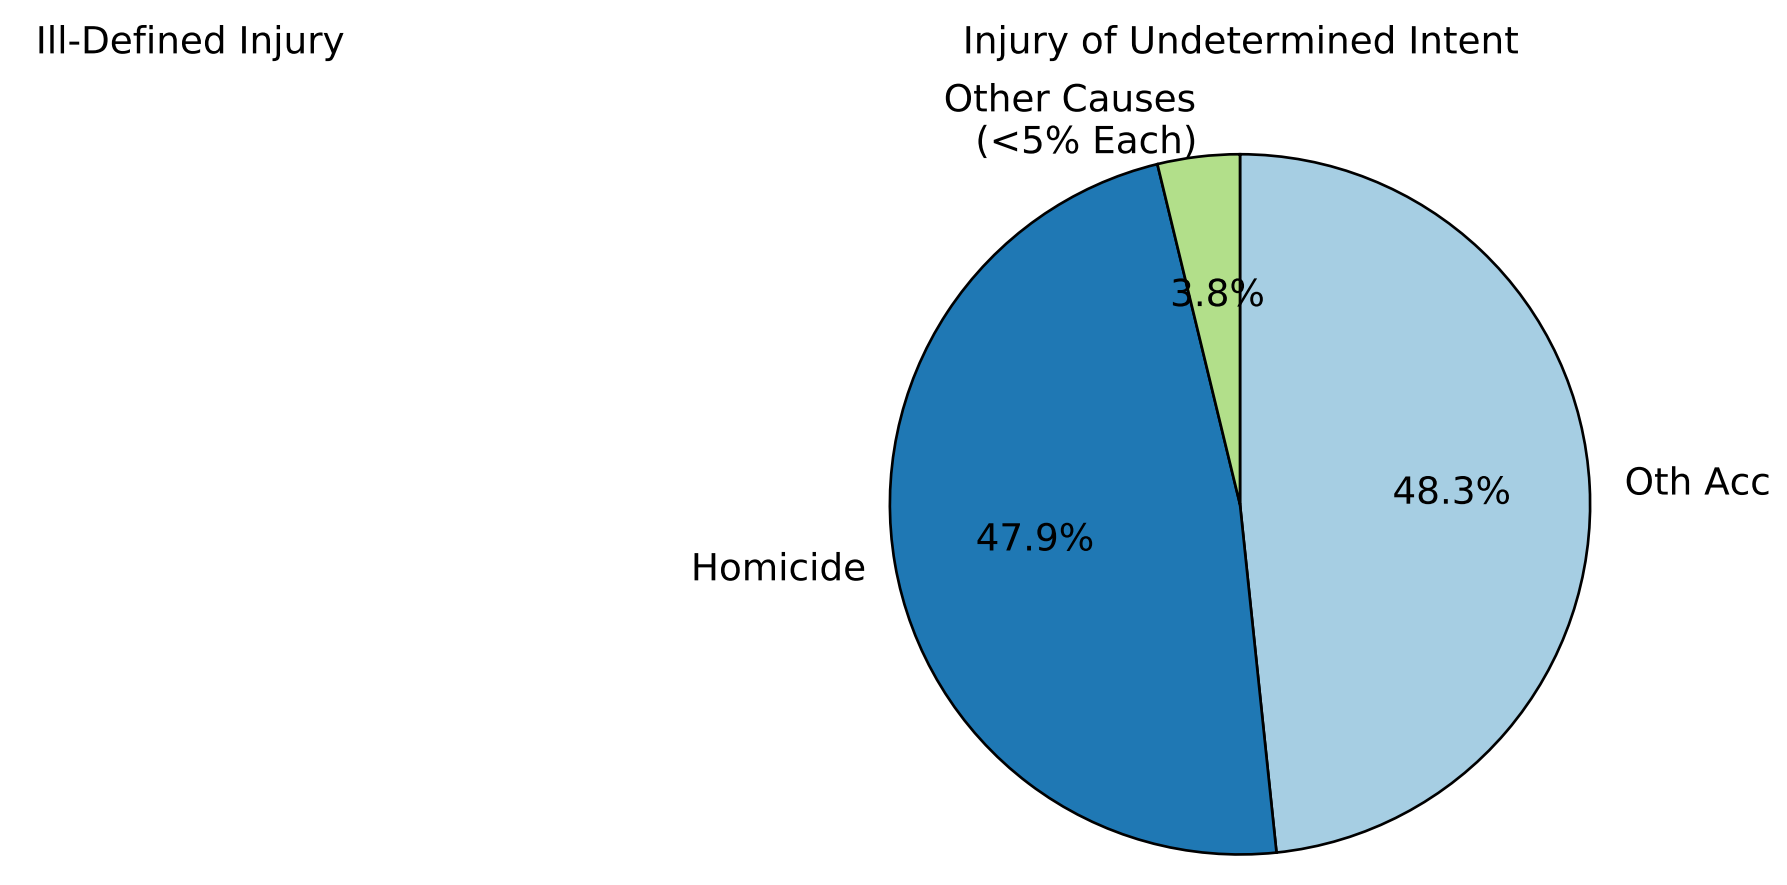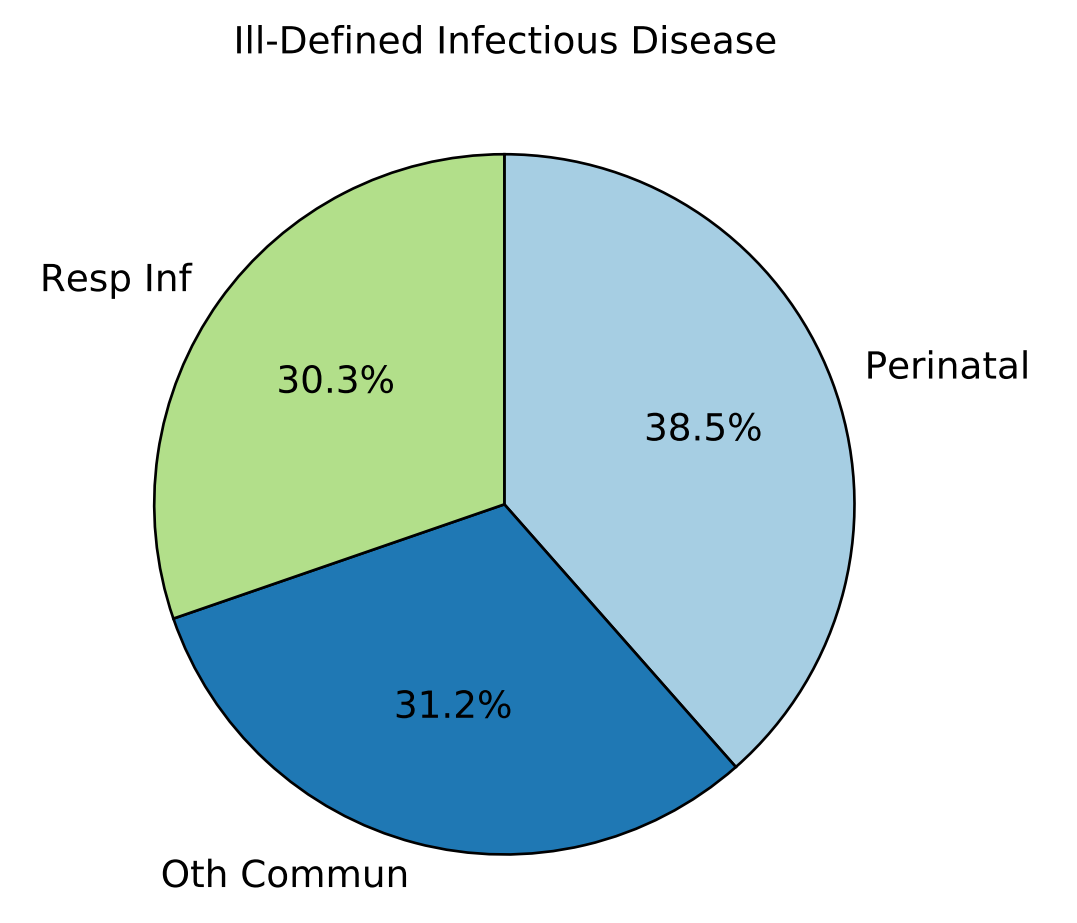

ICD 10  
Male, Age 5

Septicemia

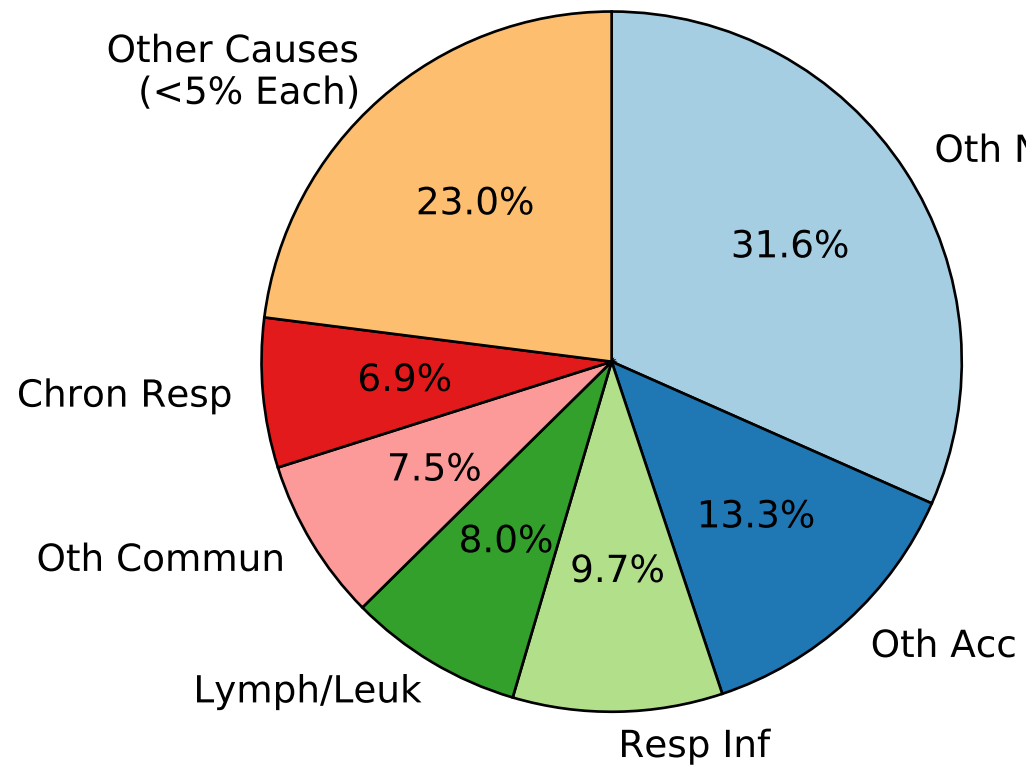

Heart Failure

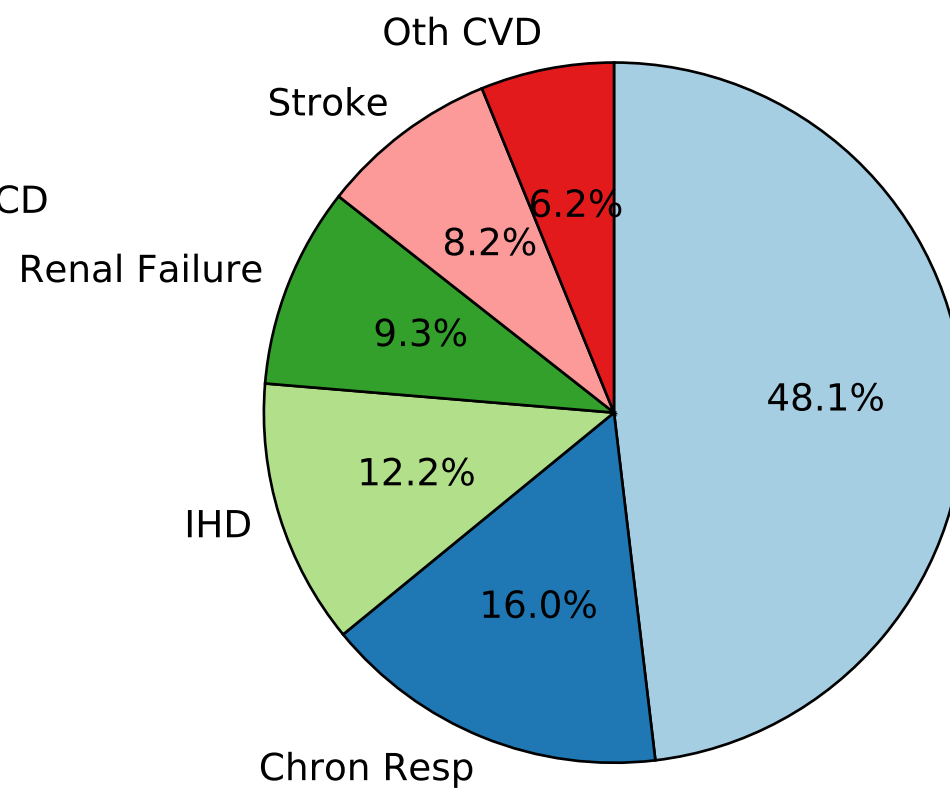

III-Defined Cancers

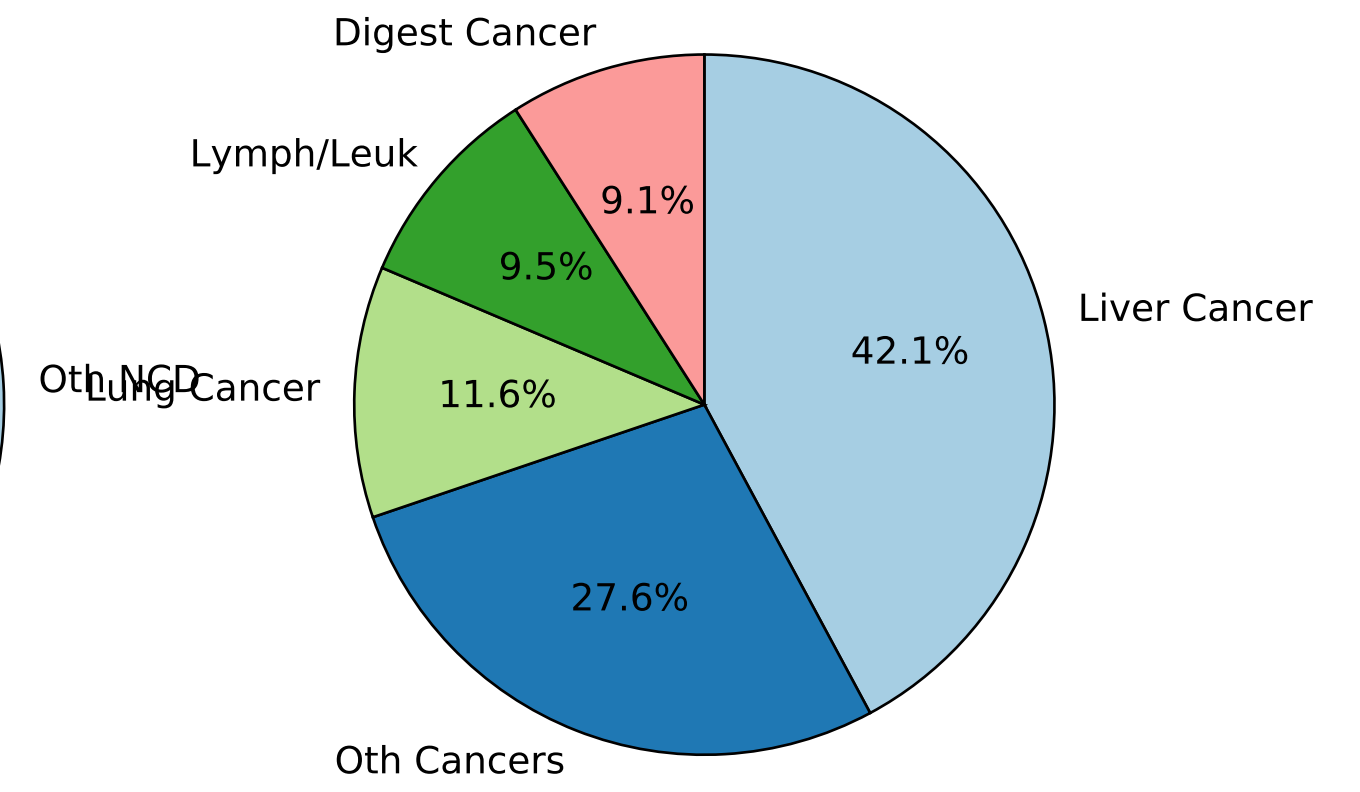

Volume Depletion

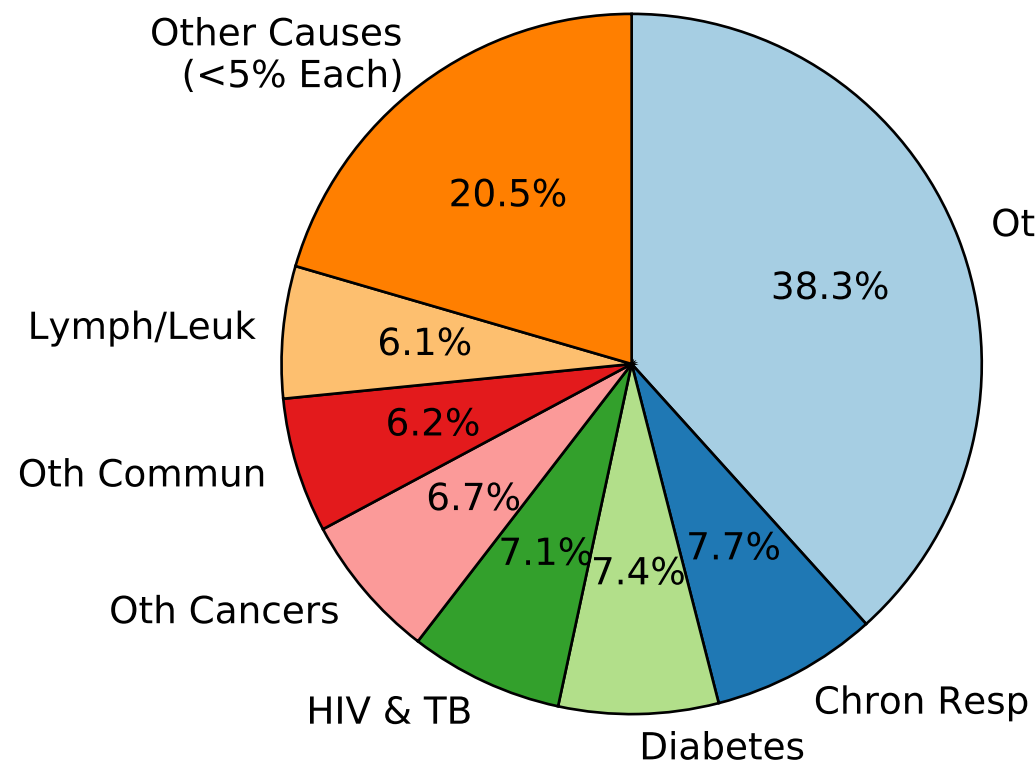

III-Defined

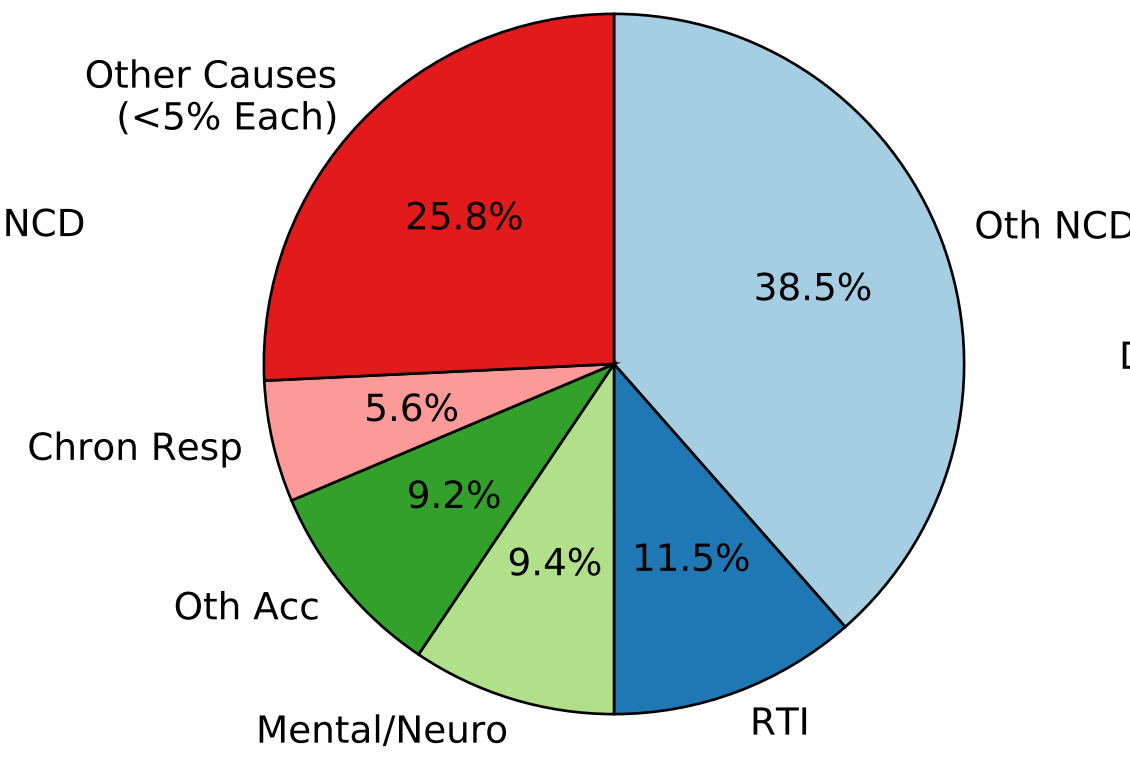

III-Defined Cardiovascular Disease

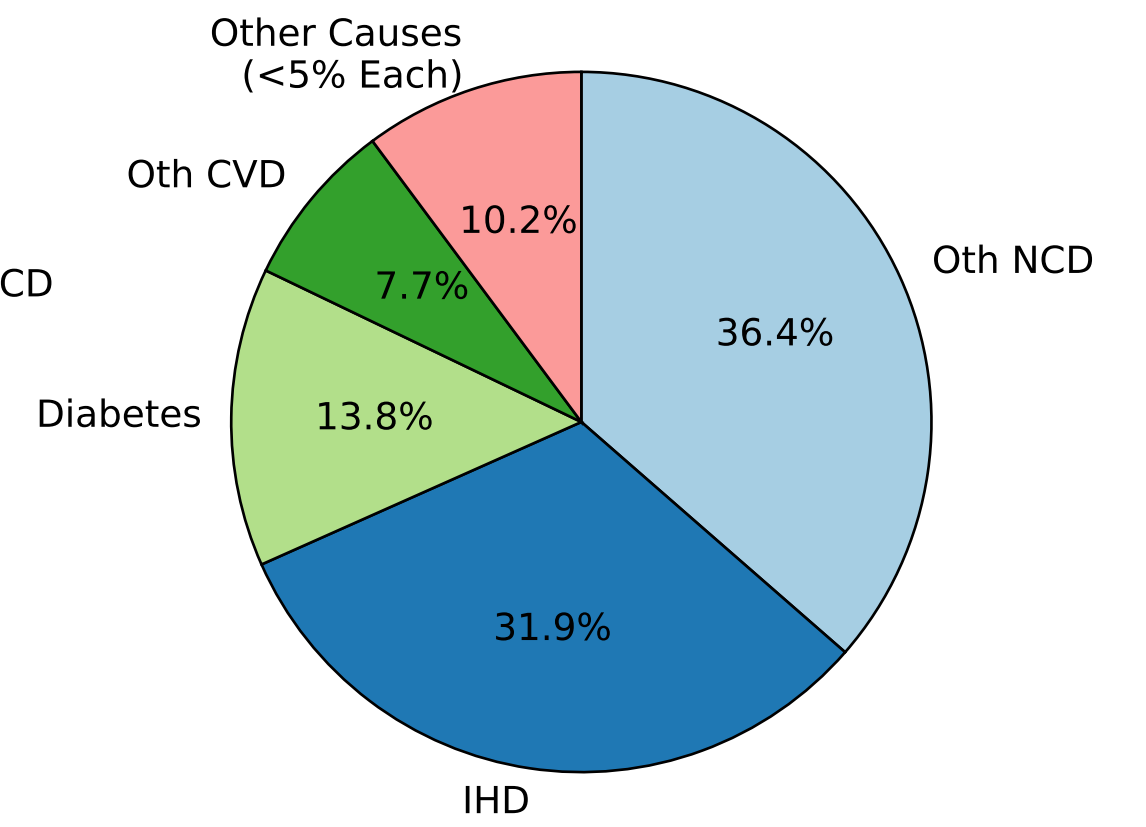

III-Defined Injury

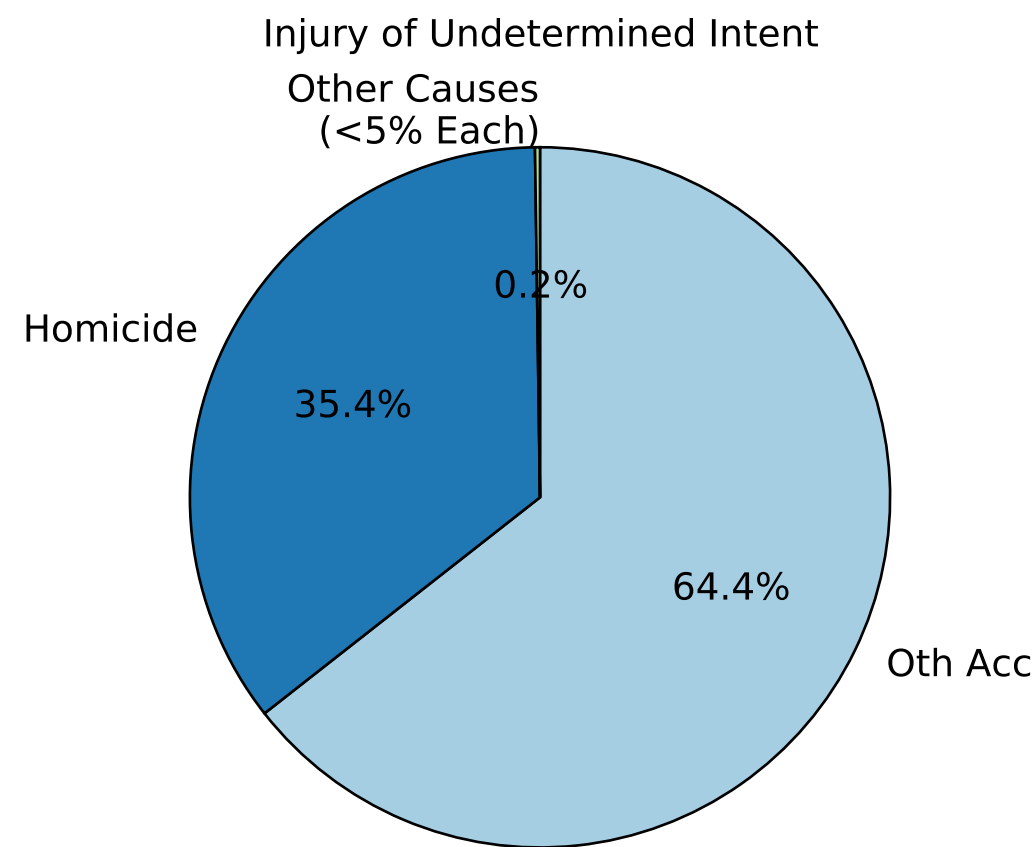

Injury of Undetermined Intent

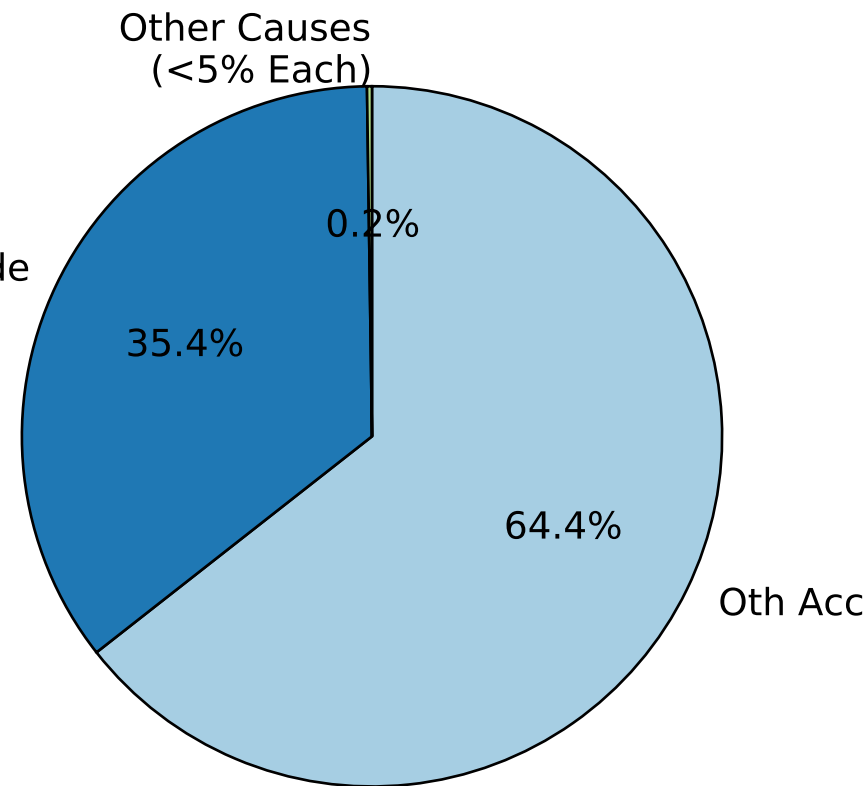

III-Defined Infectious Disease



ICD 10  
Male, Age 10

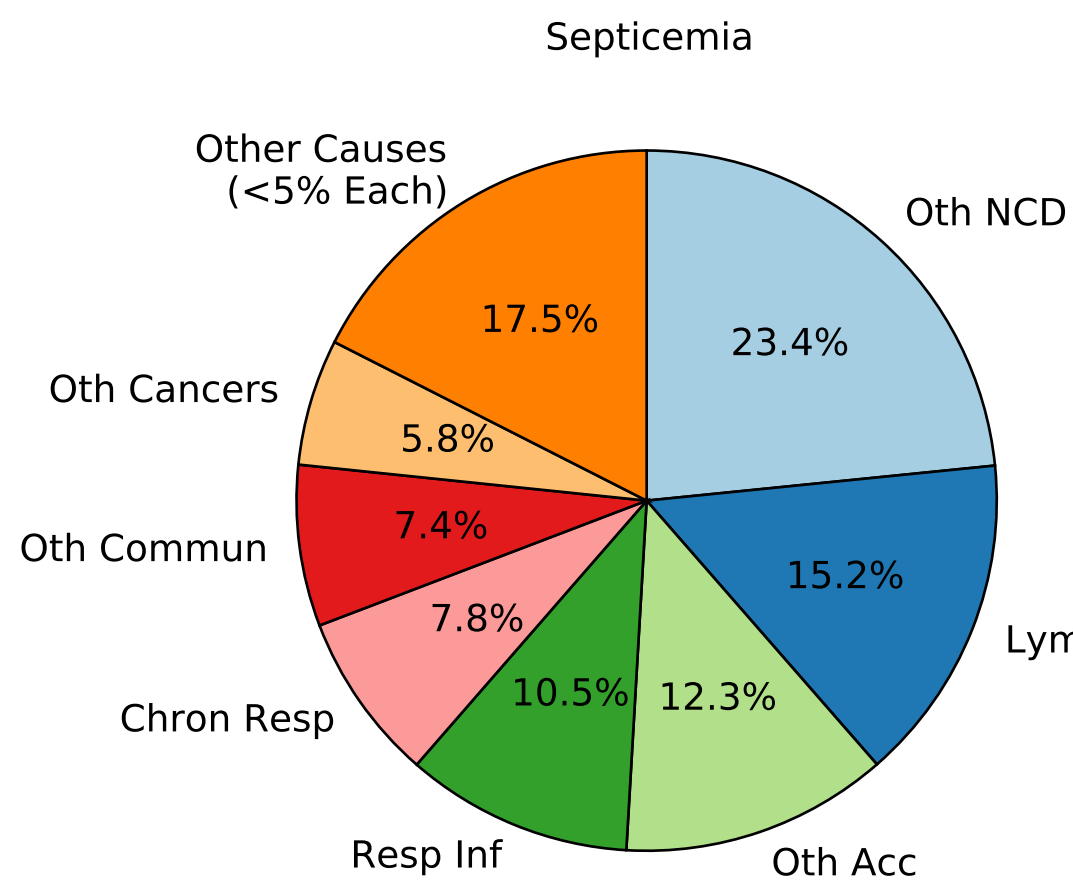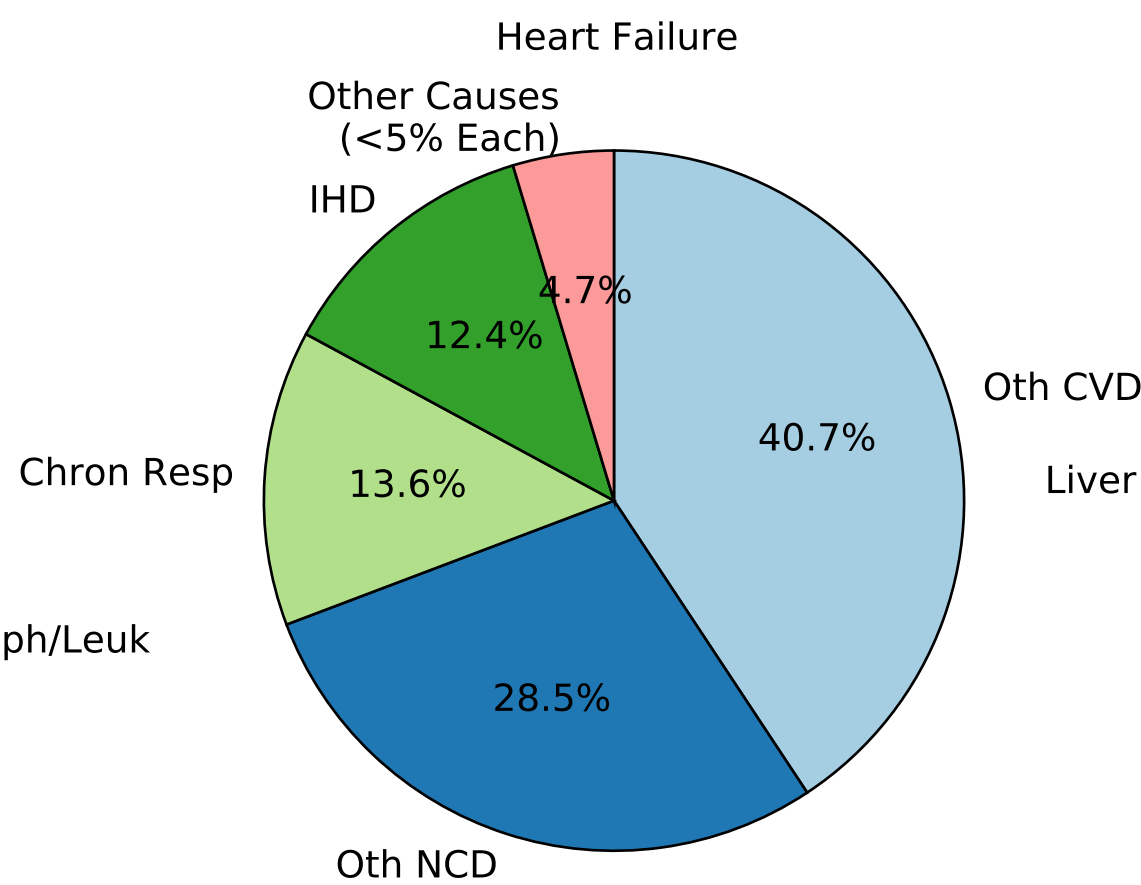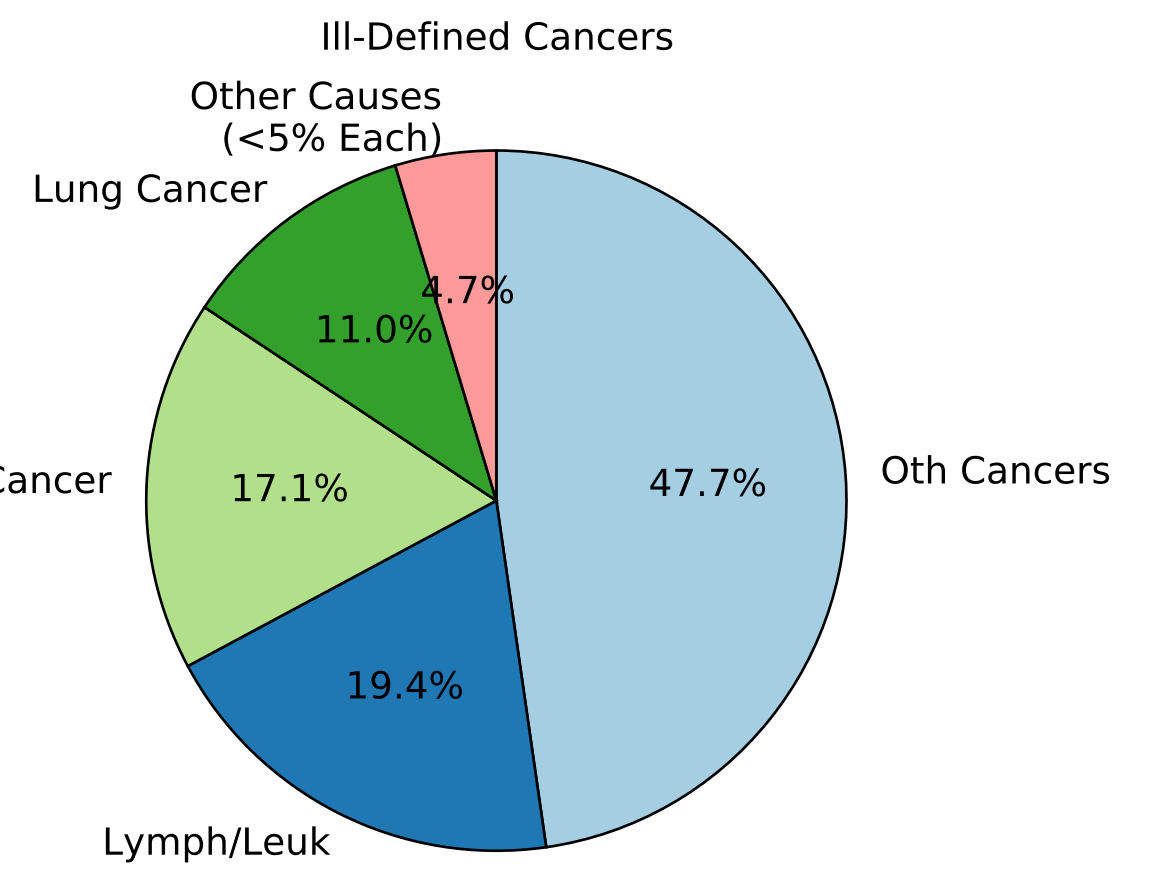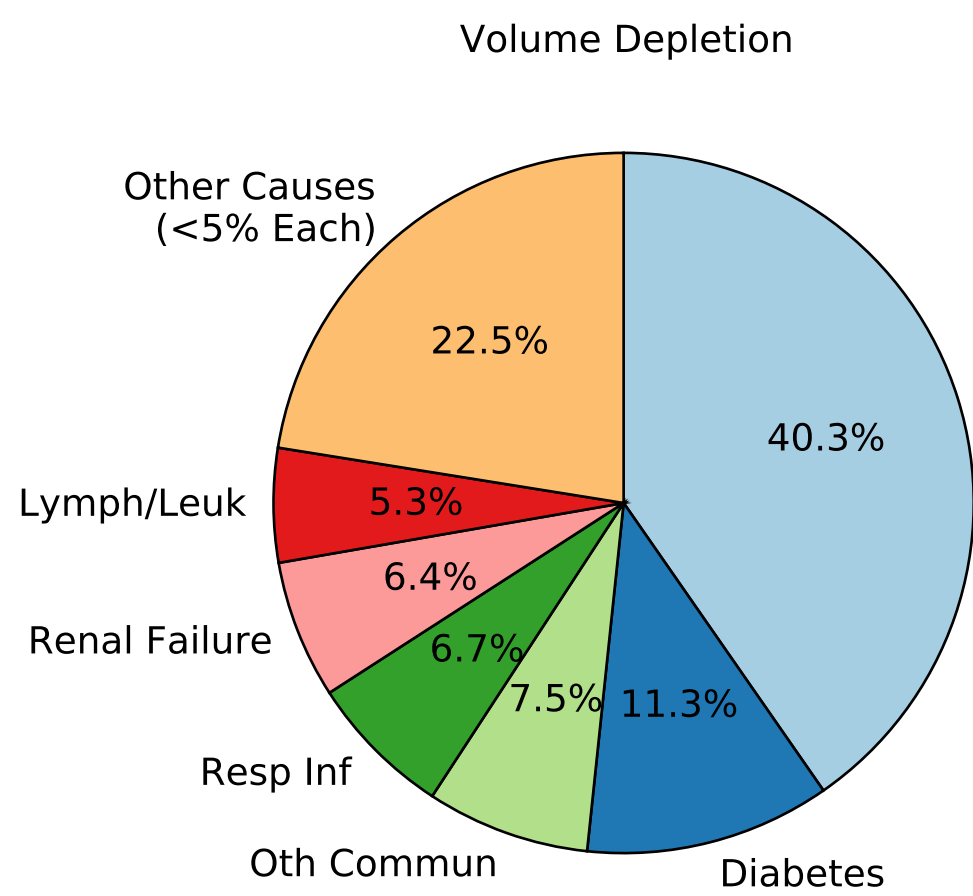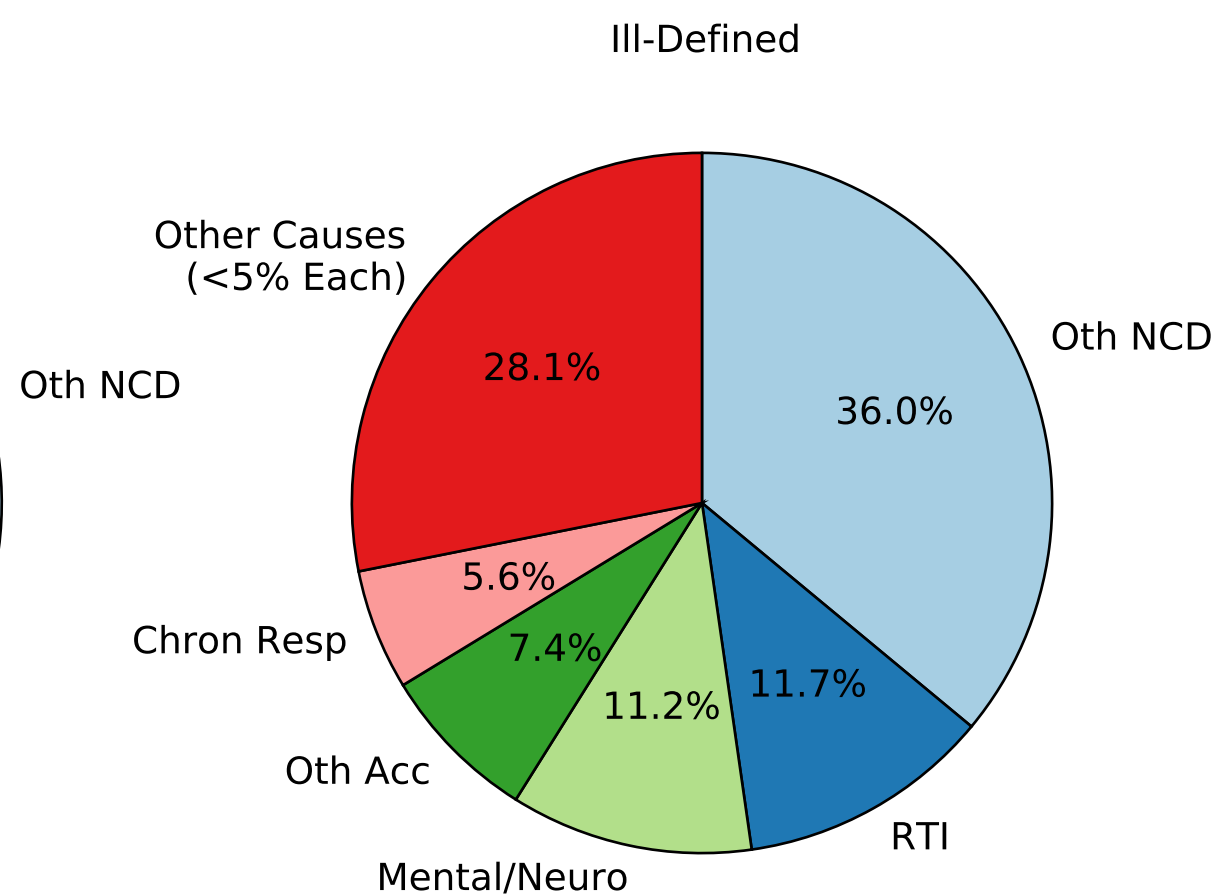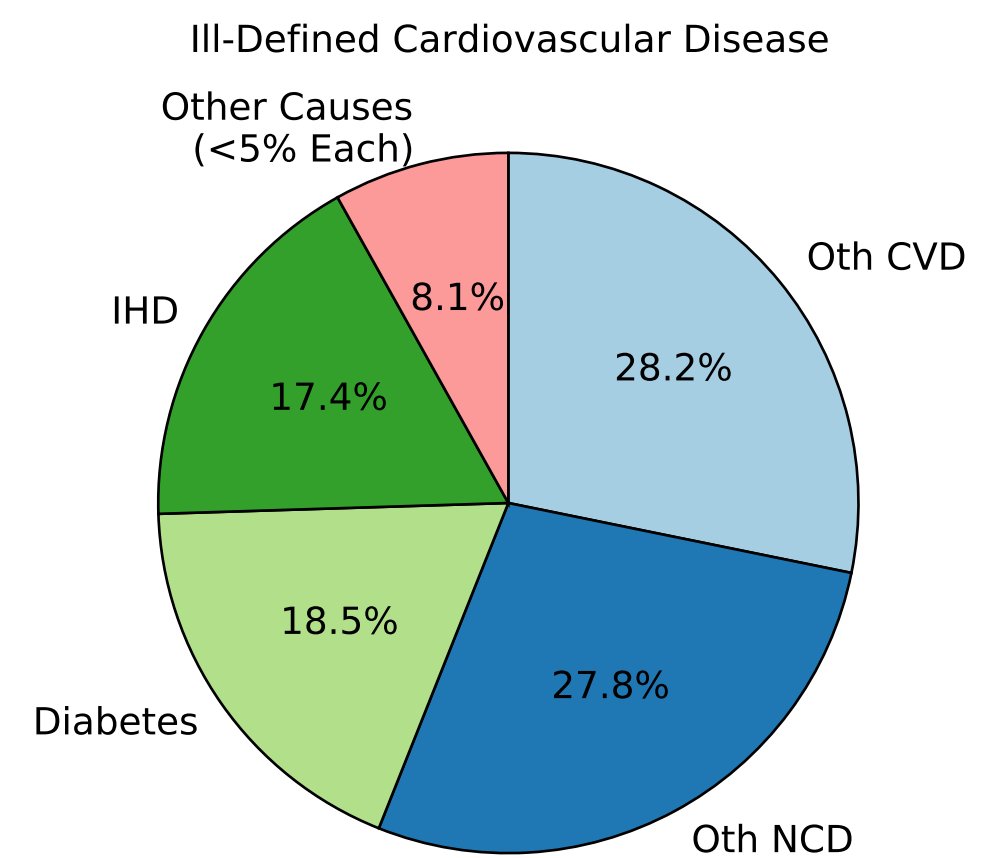

Ill-Defined Injury

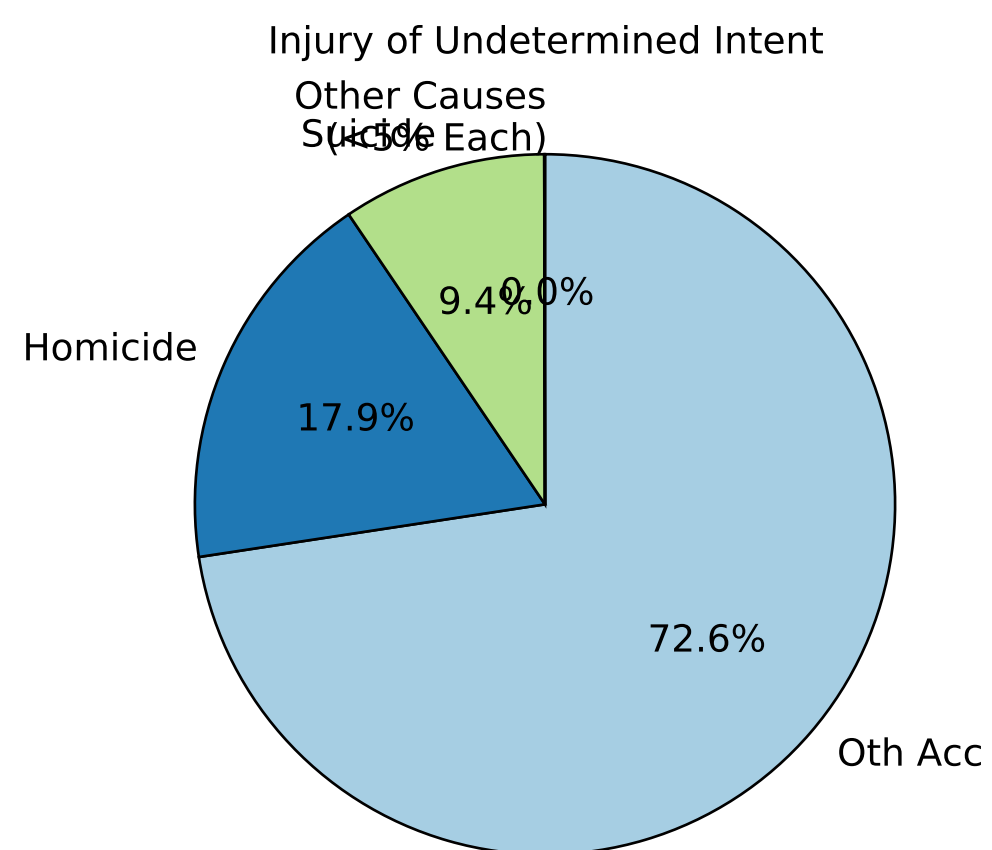

Ill-Defined Infectious Disease

ICD 10  
Male, Age 15

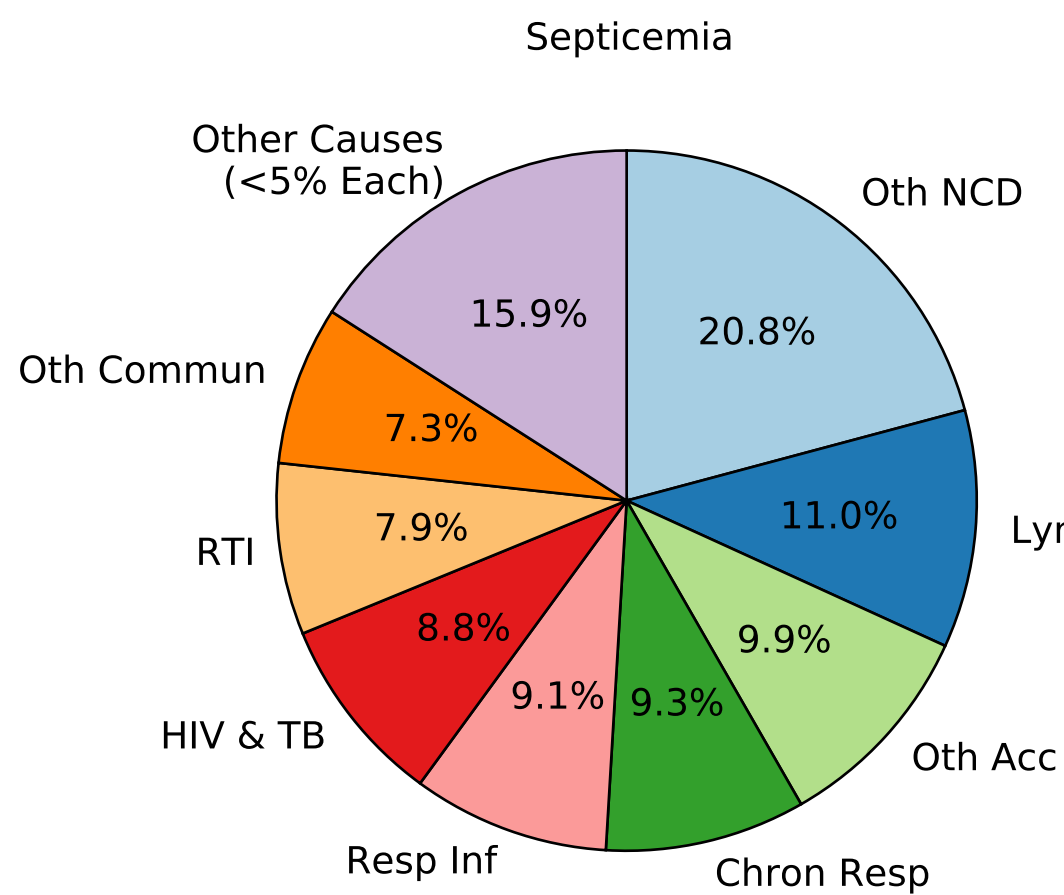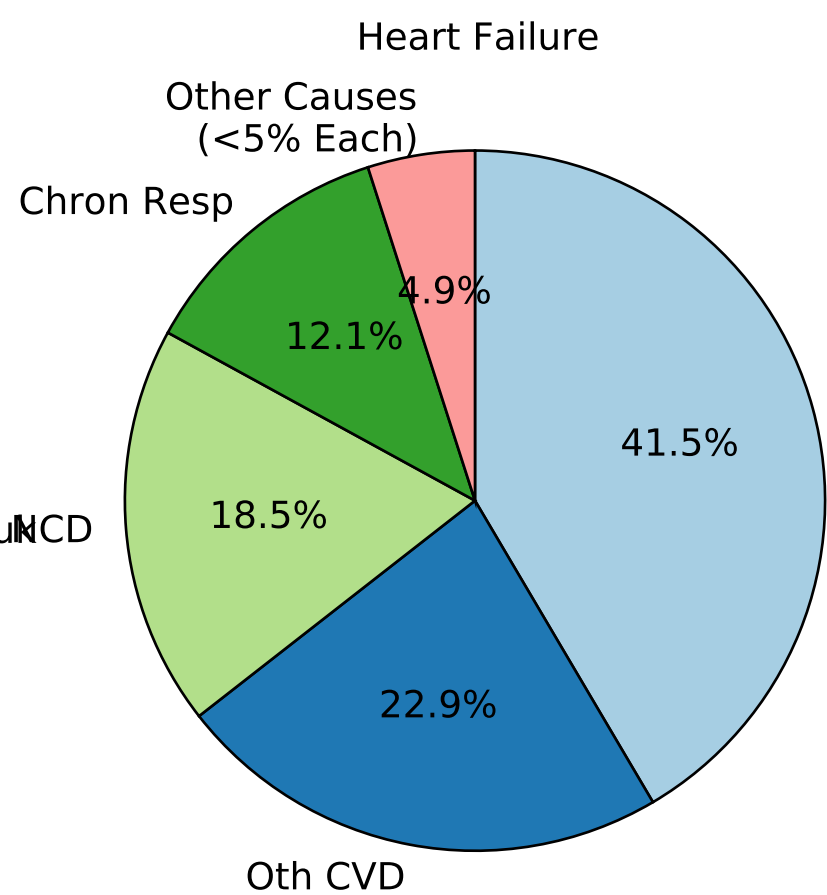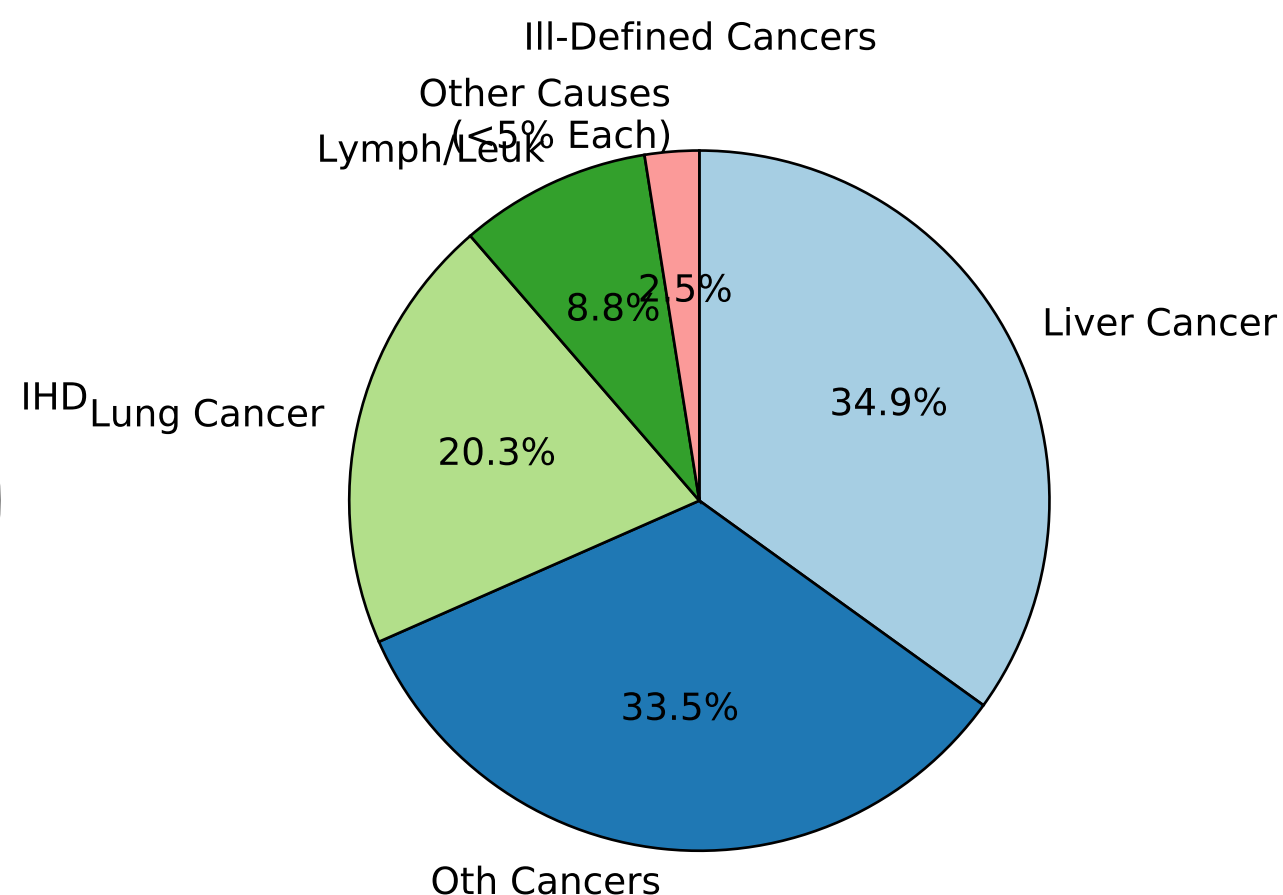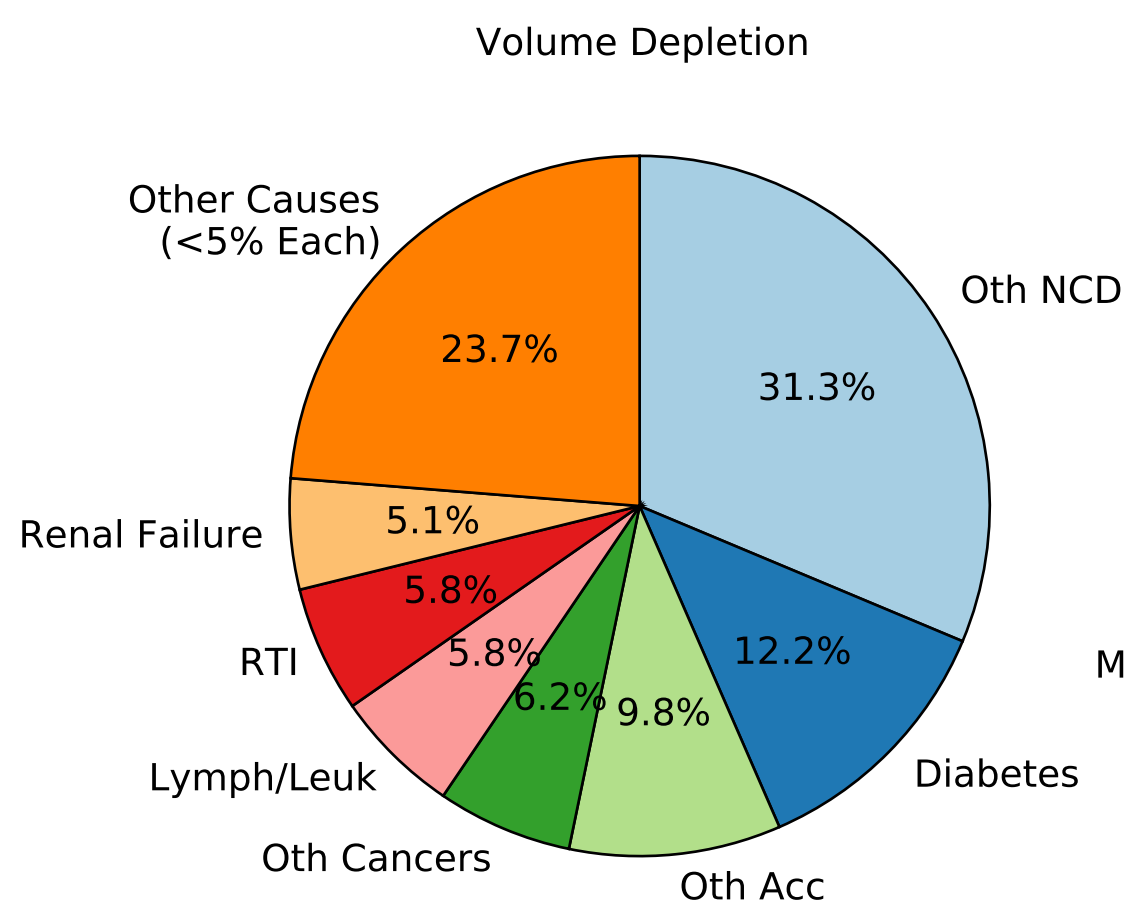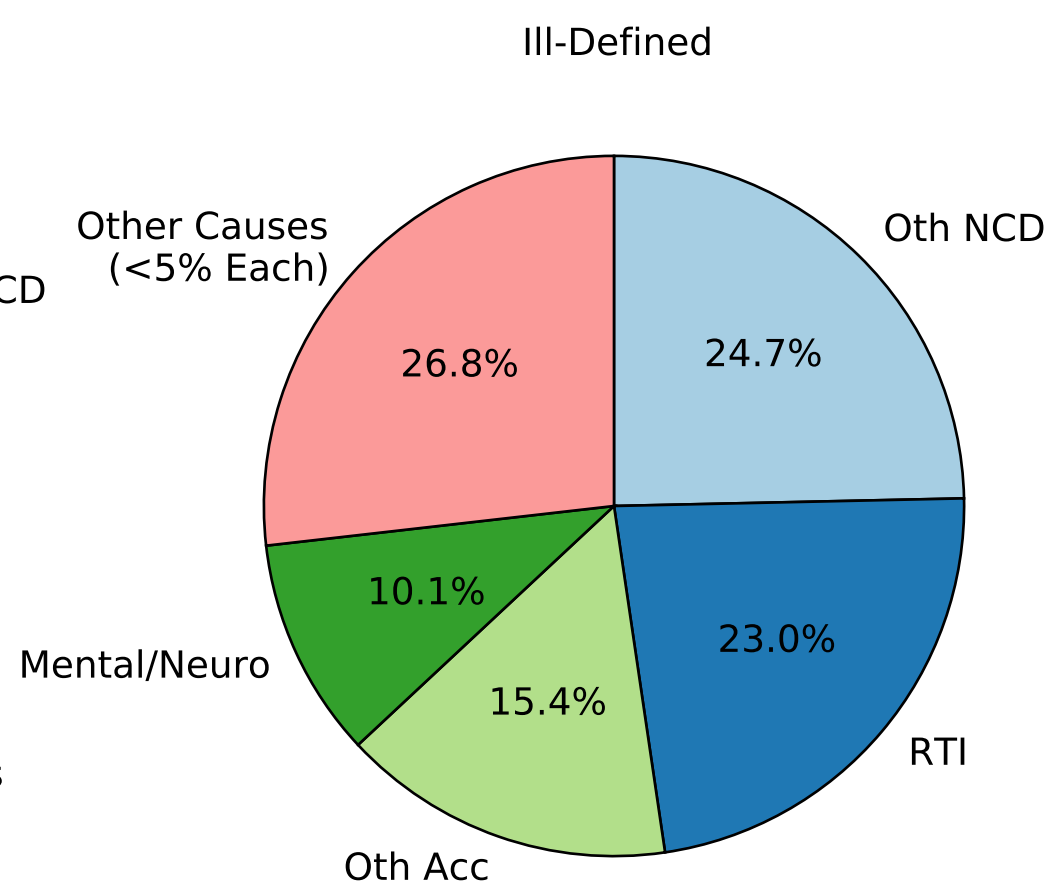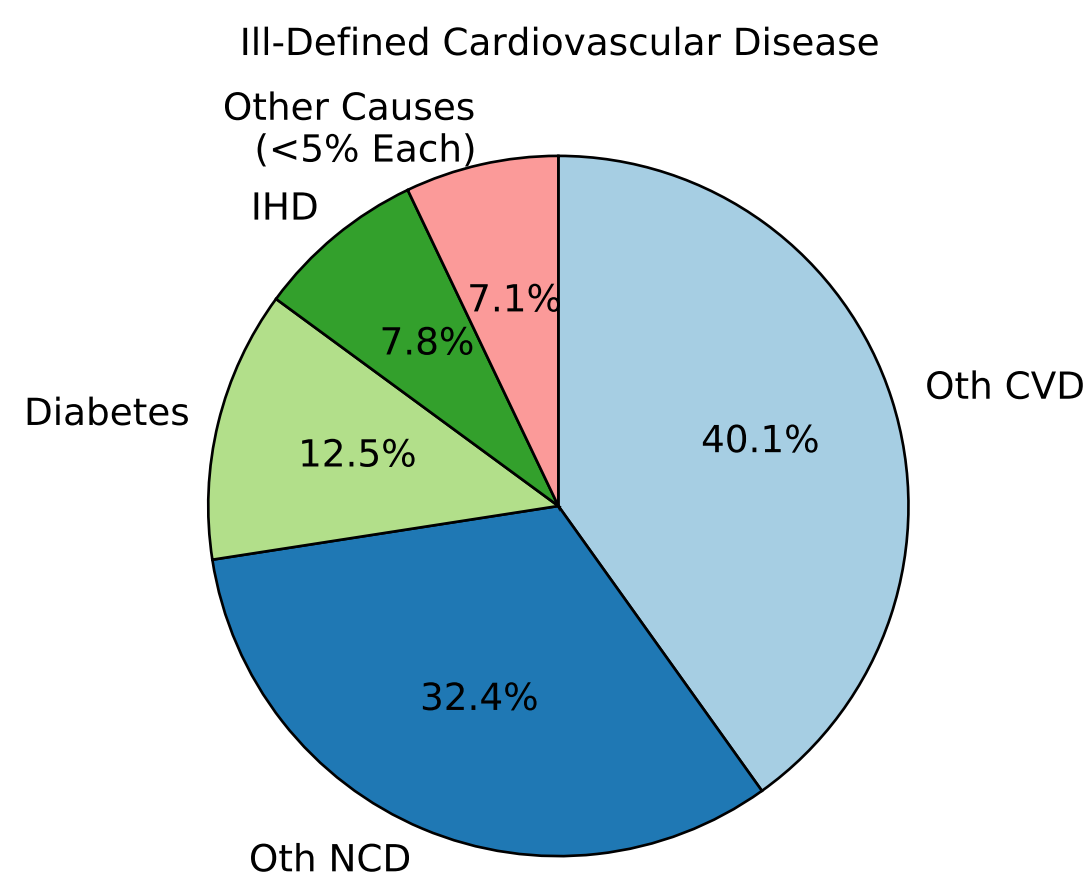

III-Defined Injury

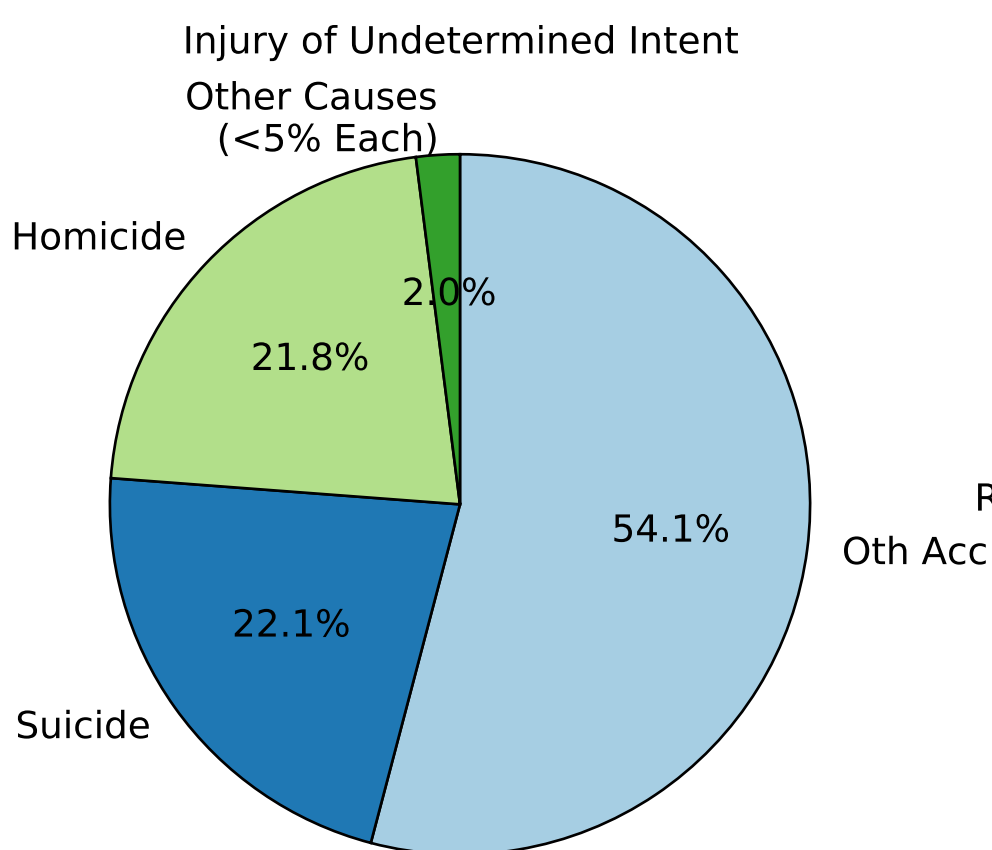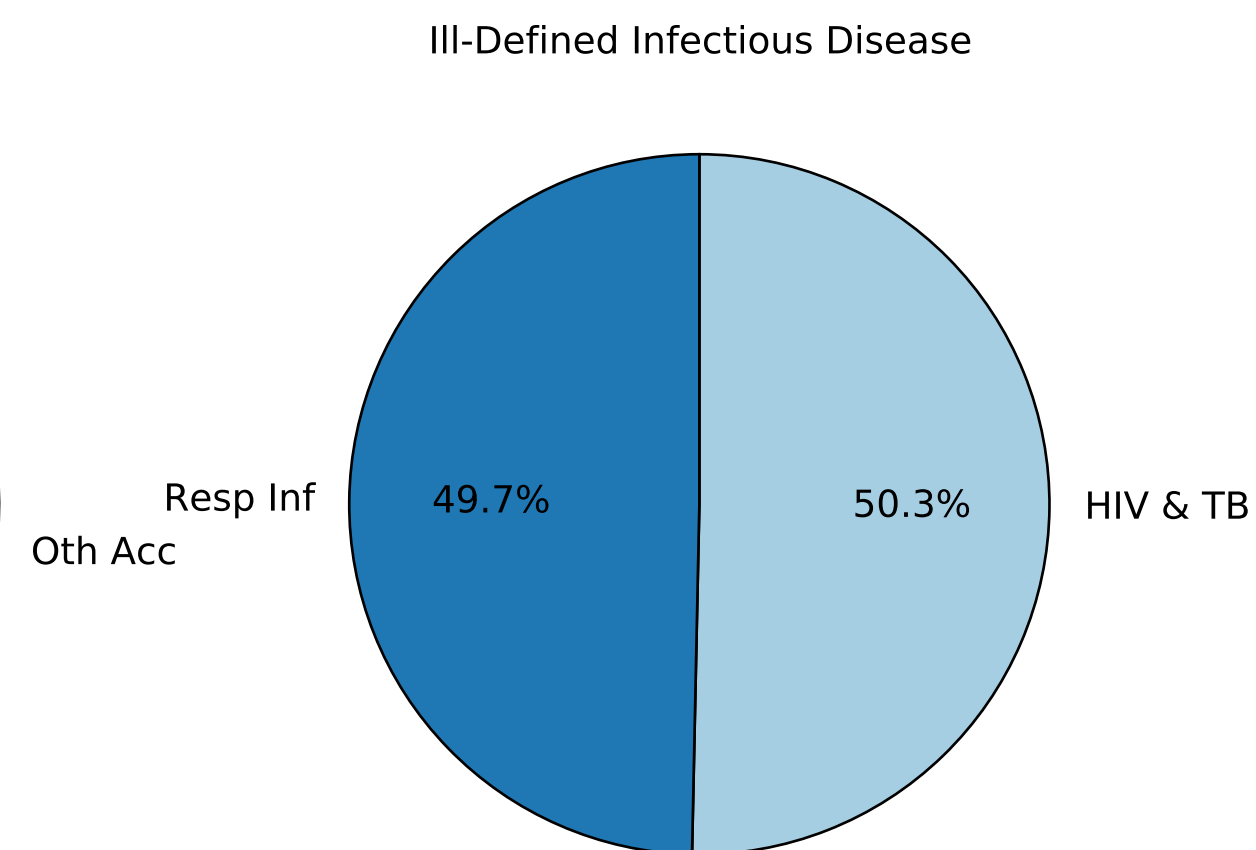

ICD 10  
Male, Age 20

Septicemia

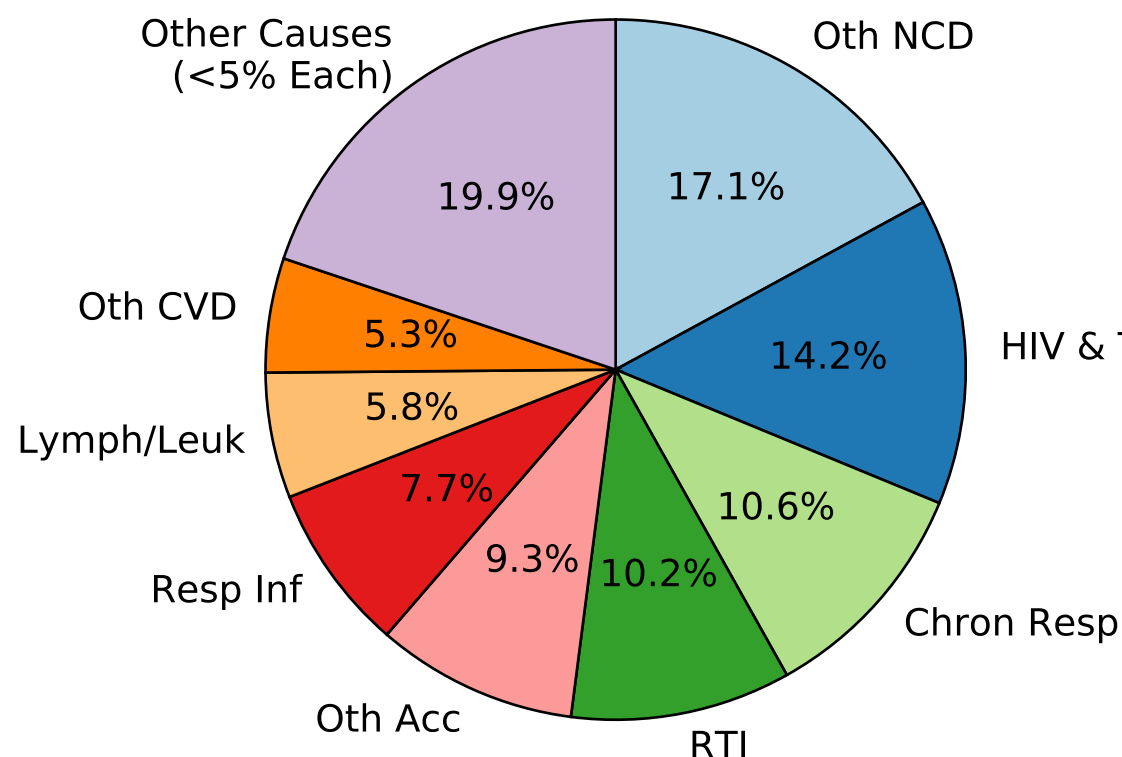

Heart Failure

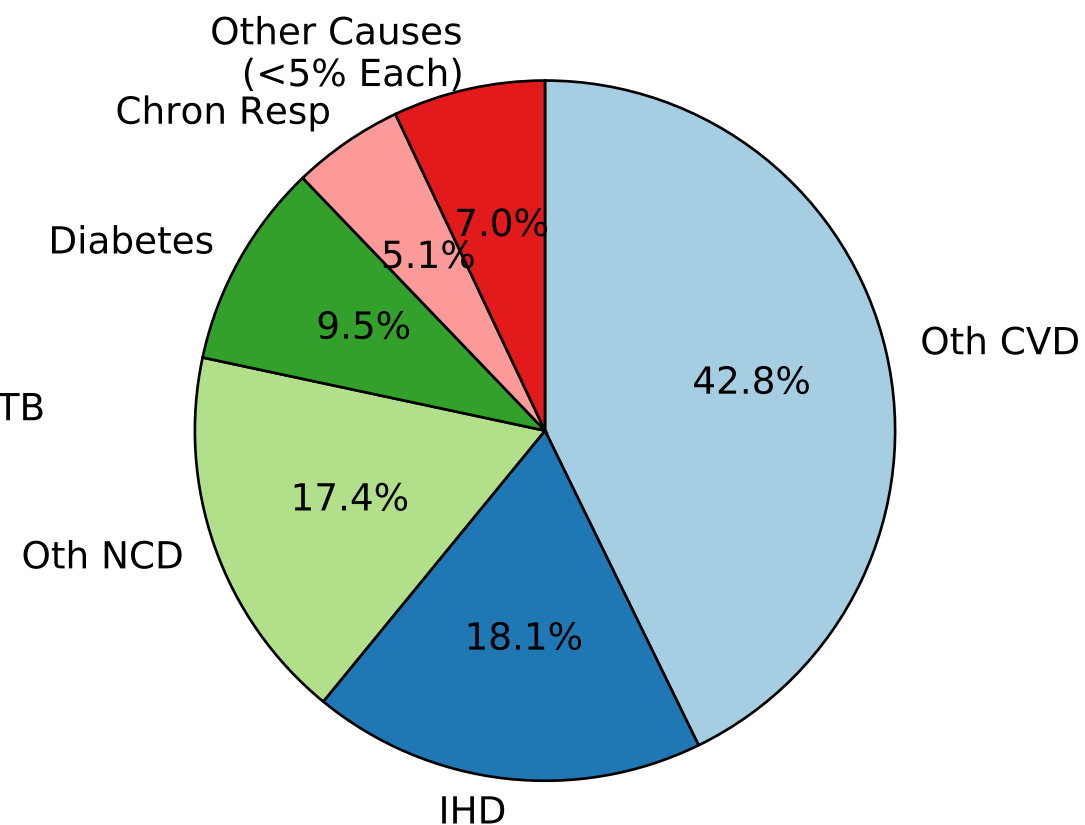

III-Defined Cancers

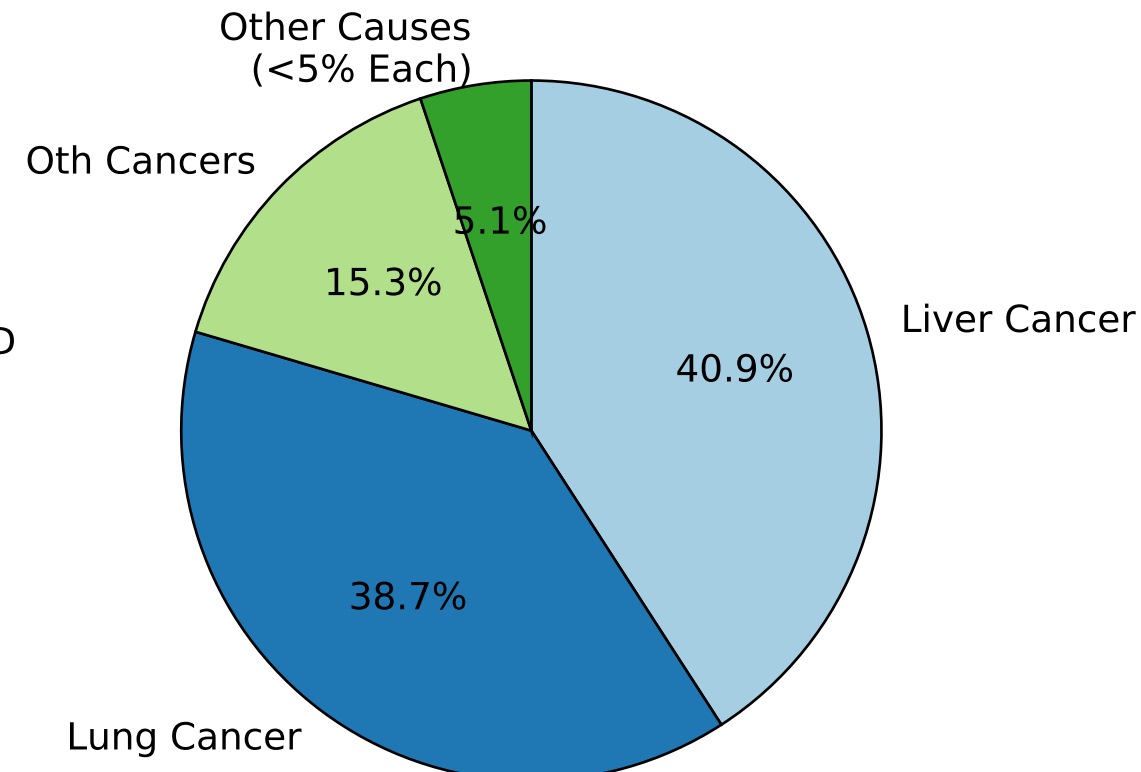

Volume Depletion

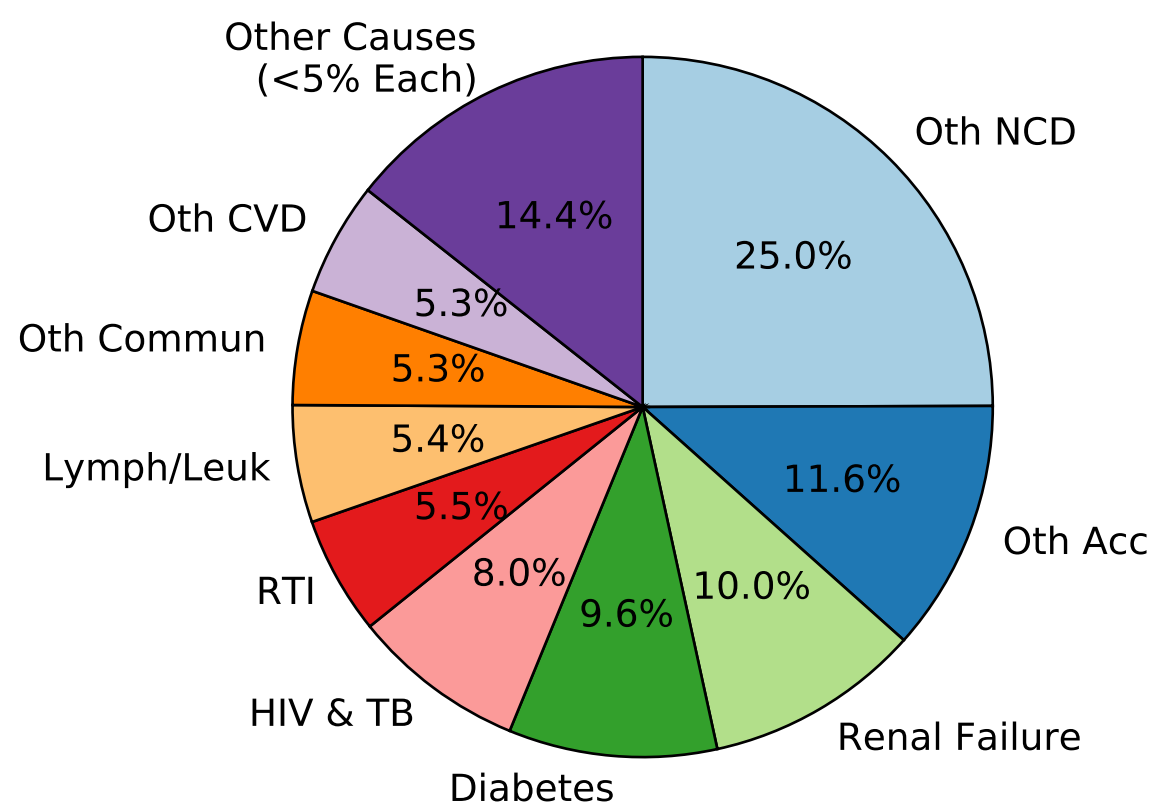

III-Defined

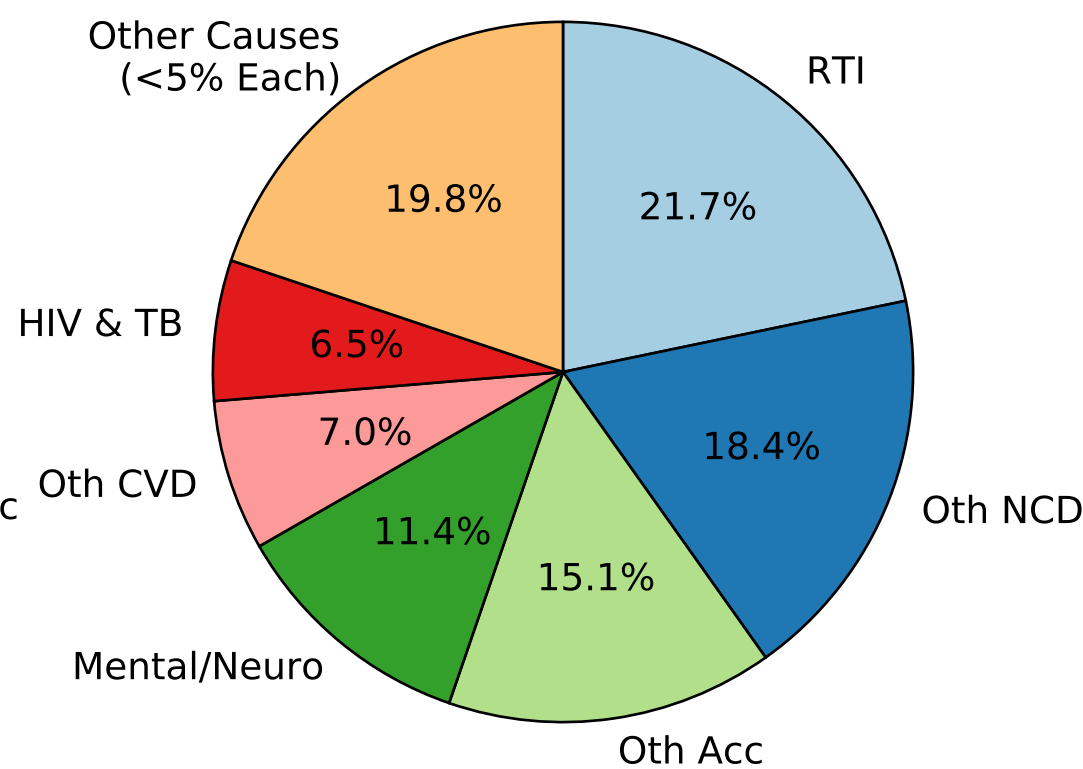

III-Defined Cardiovascular Disease

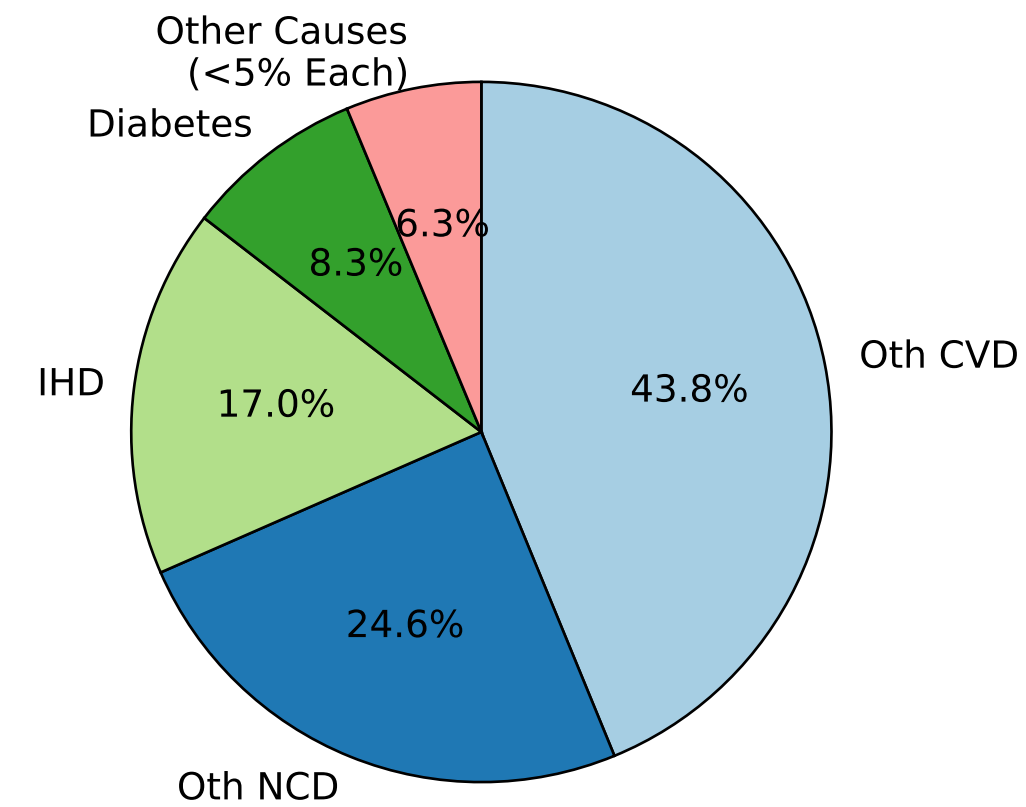

III-Defined Injury

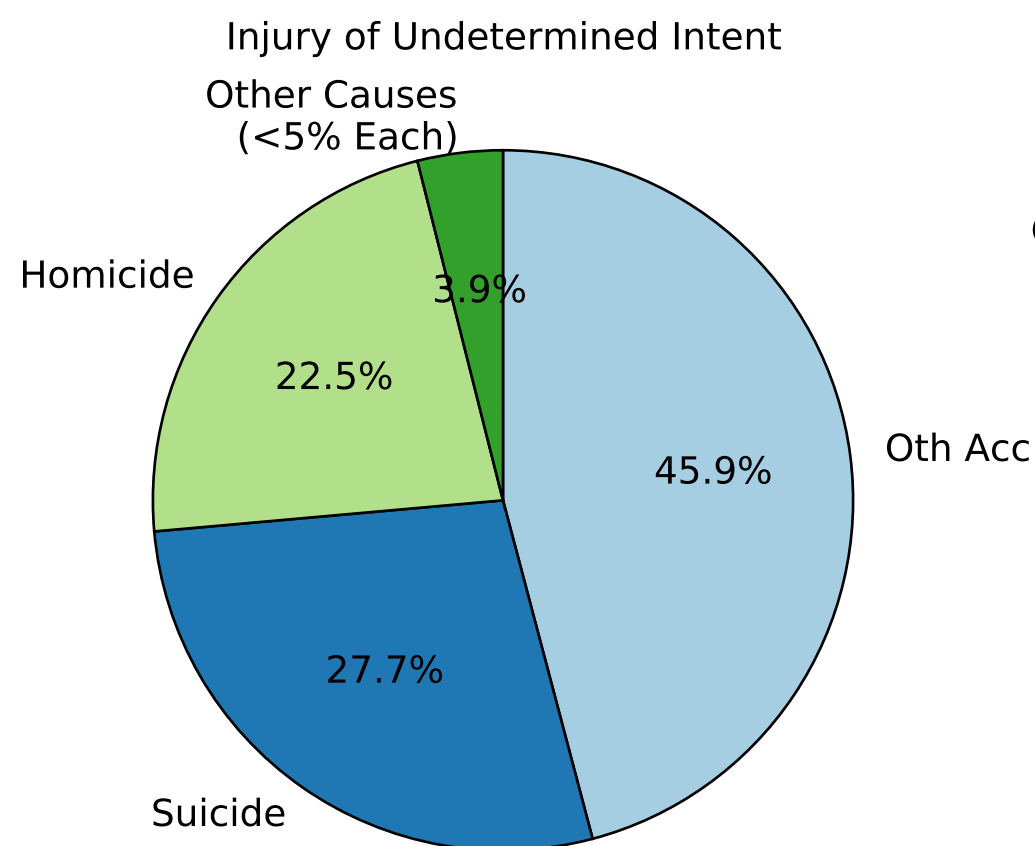

Injury of Undetermined Intent

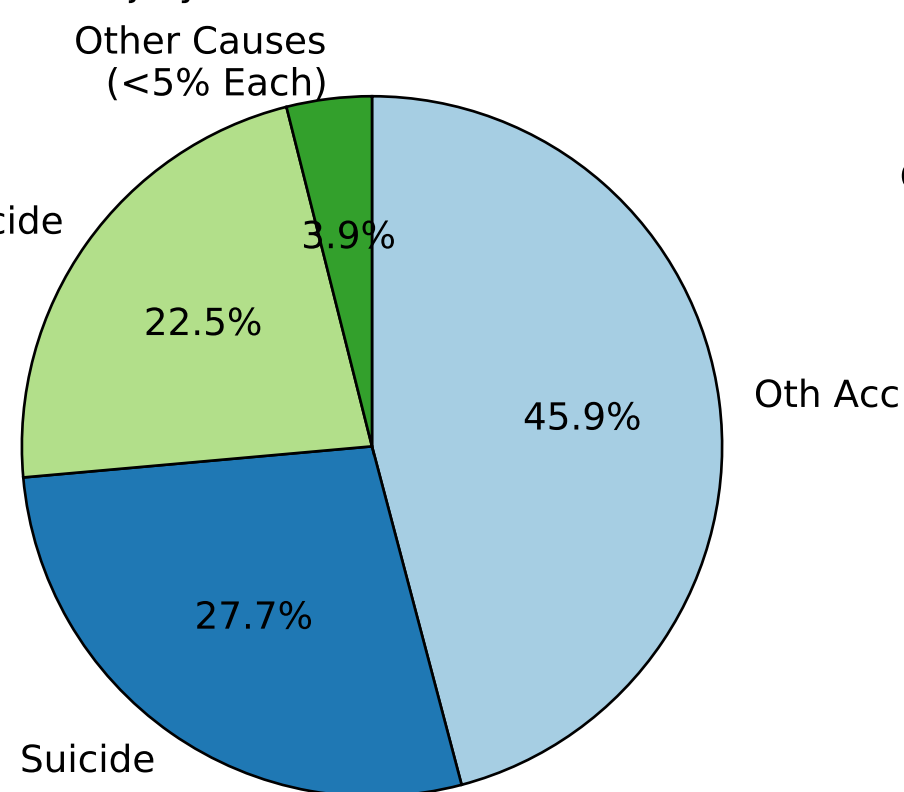

III-Defined Infectious Disease

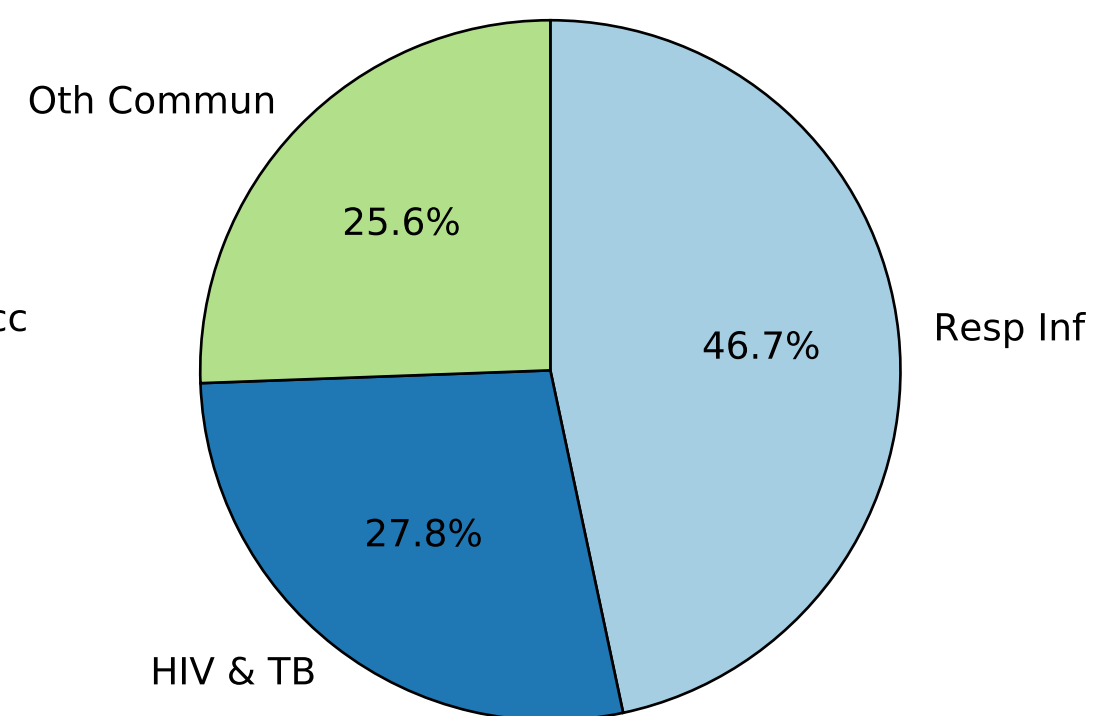

ICD 10  
Male, Age 25

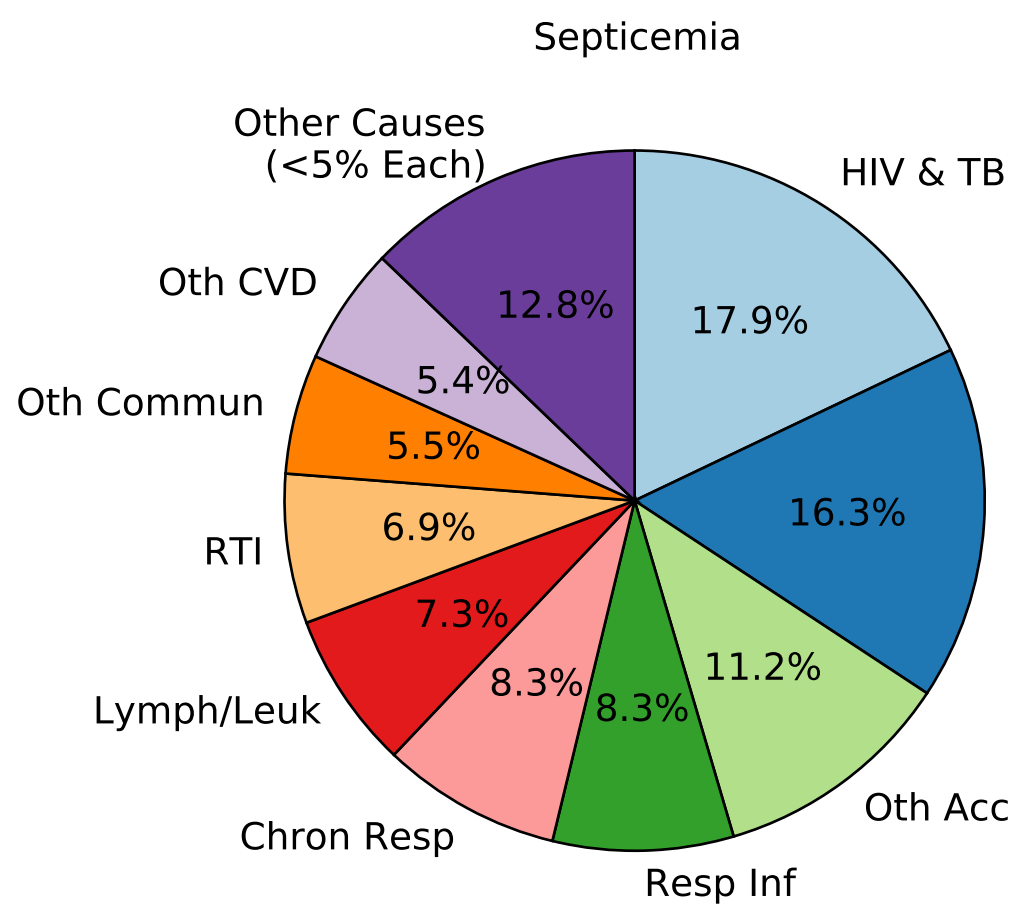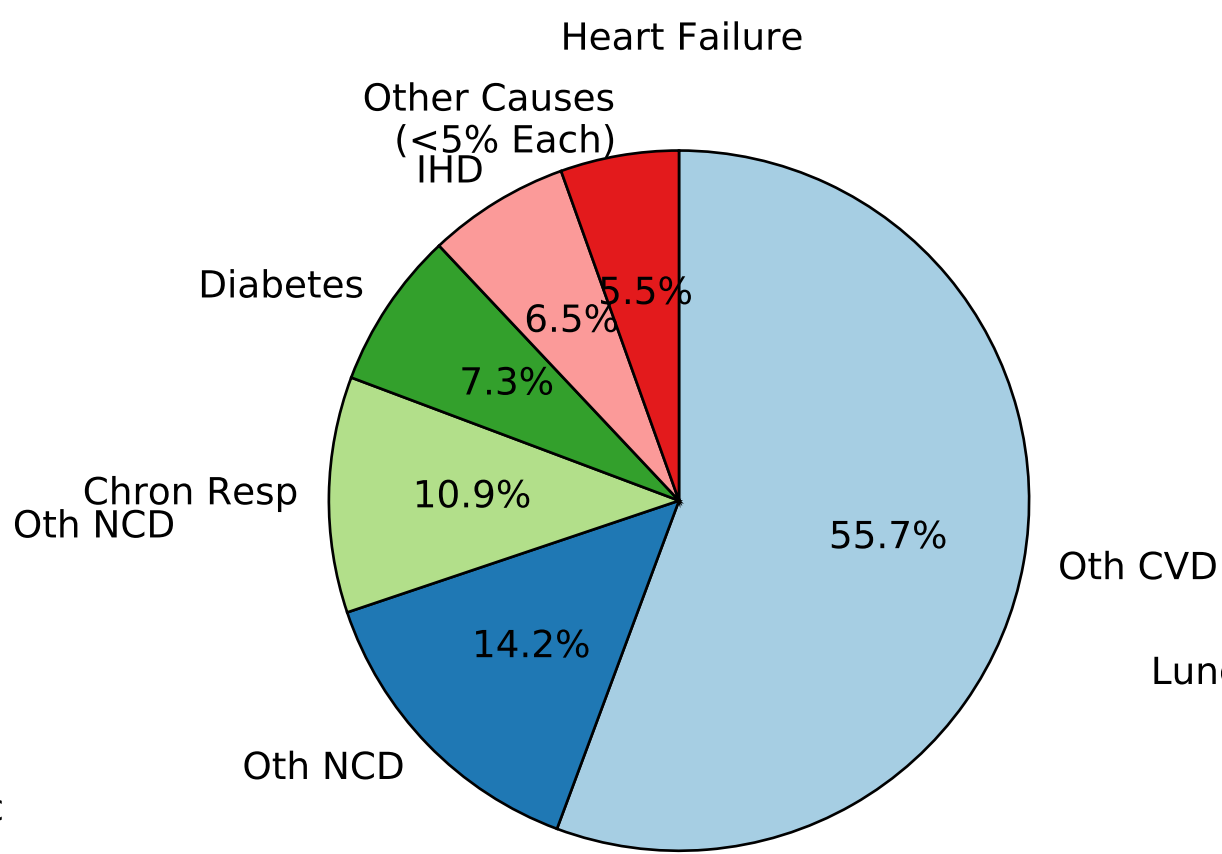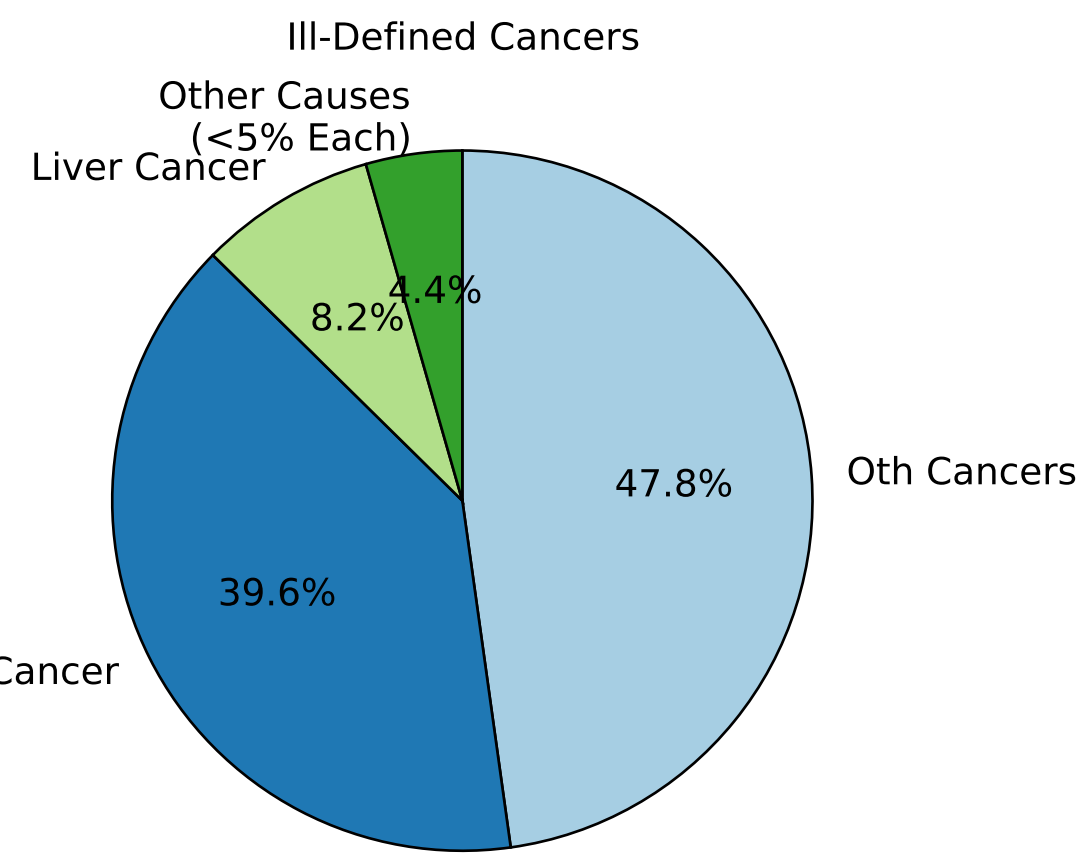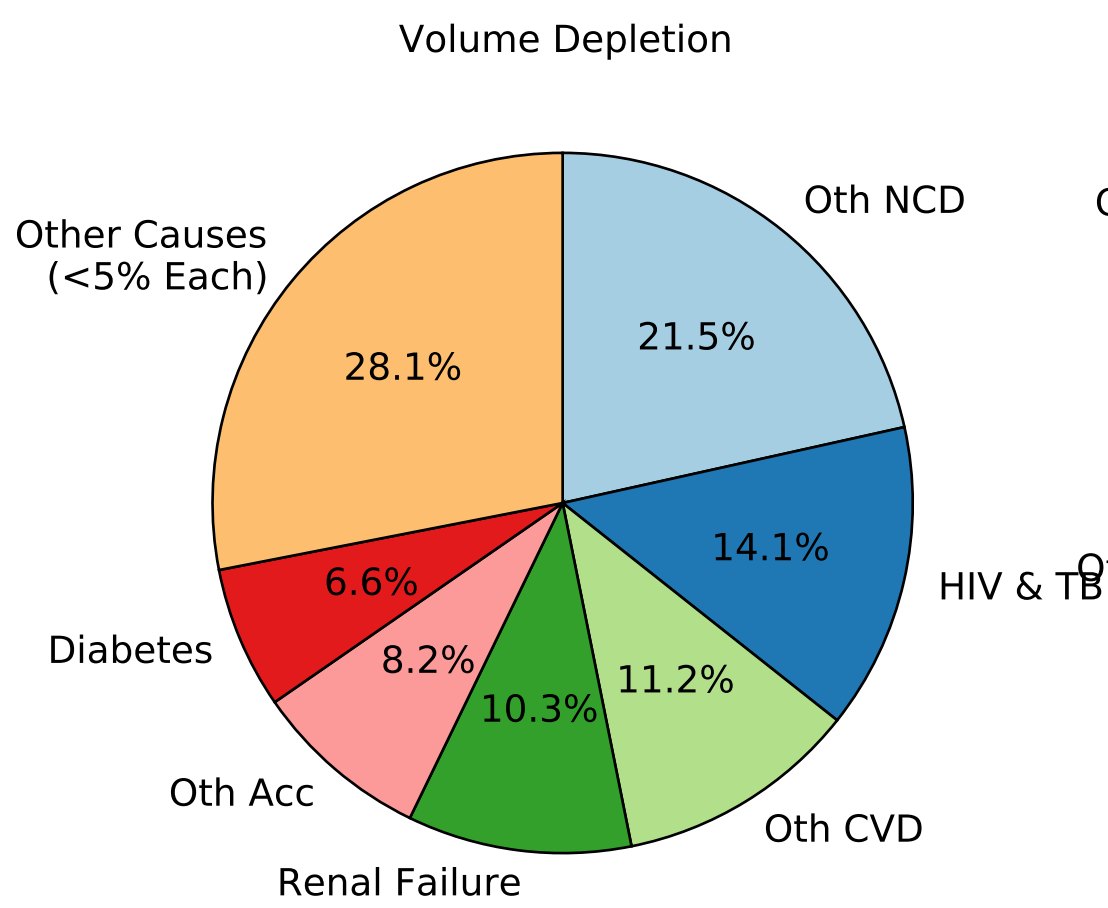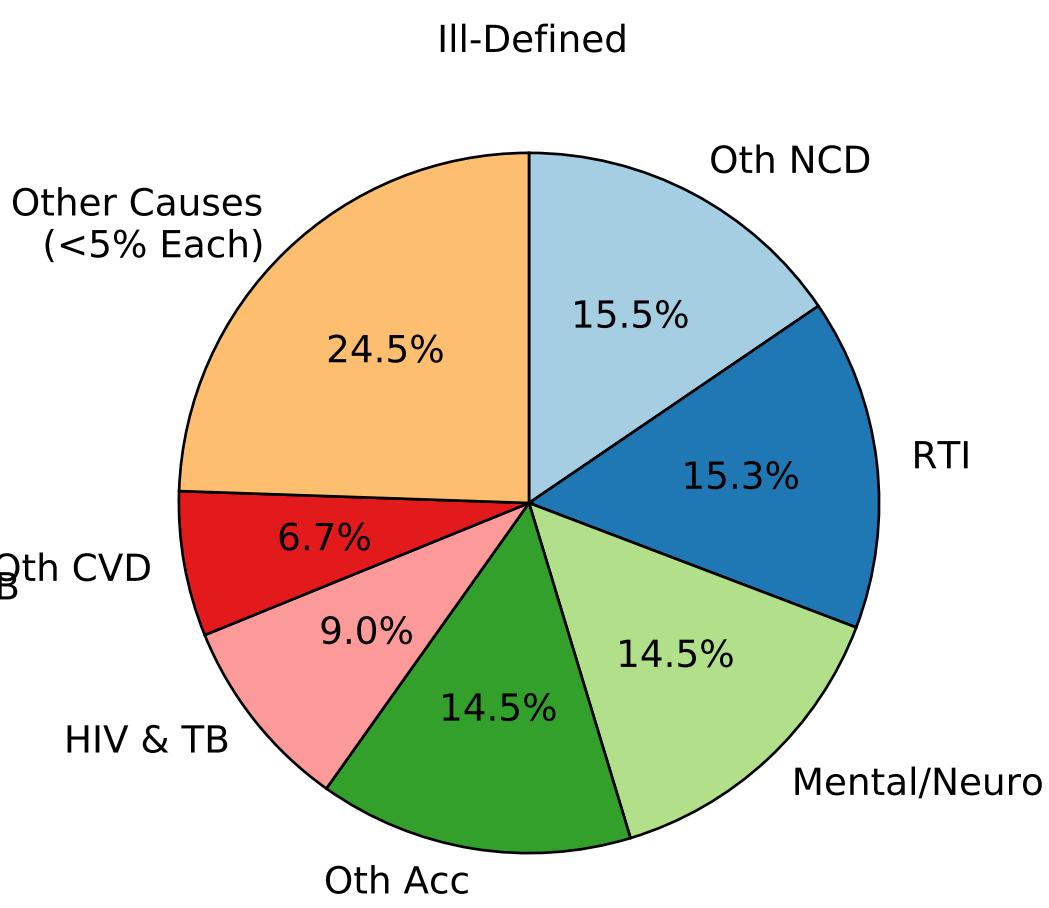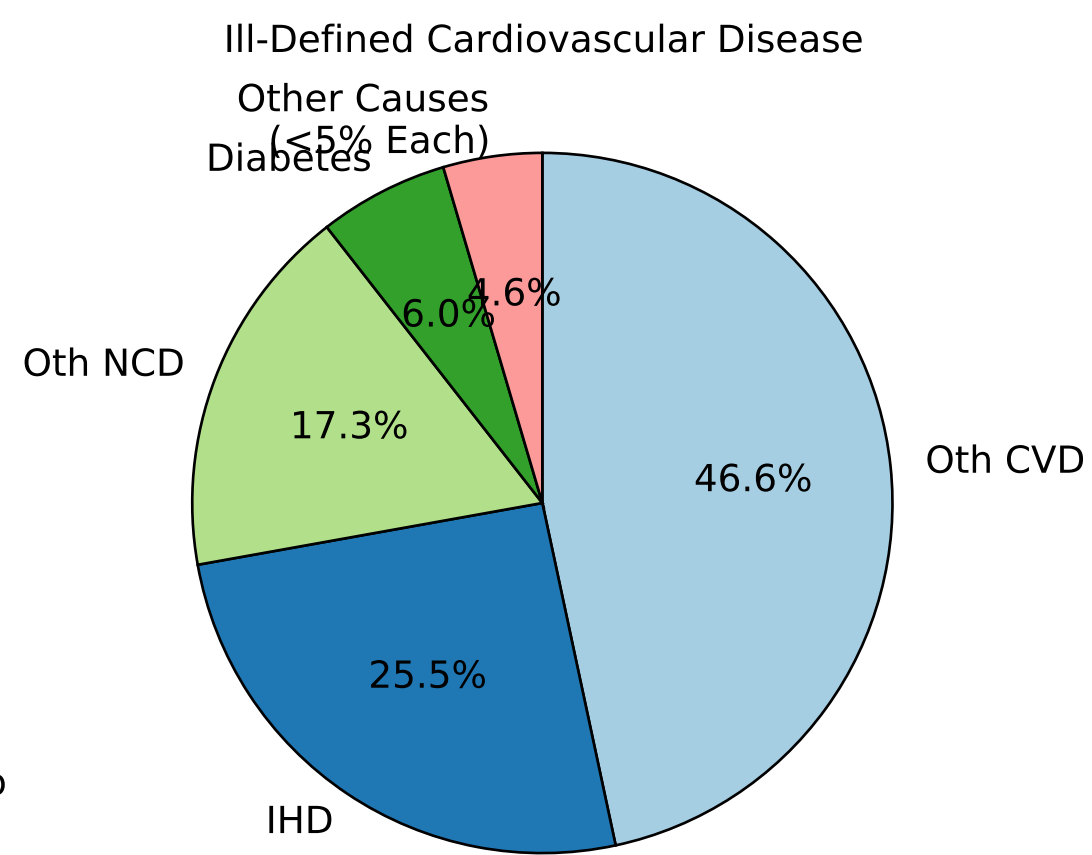

Ill-Defined Injury

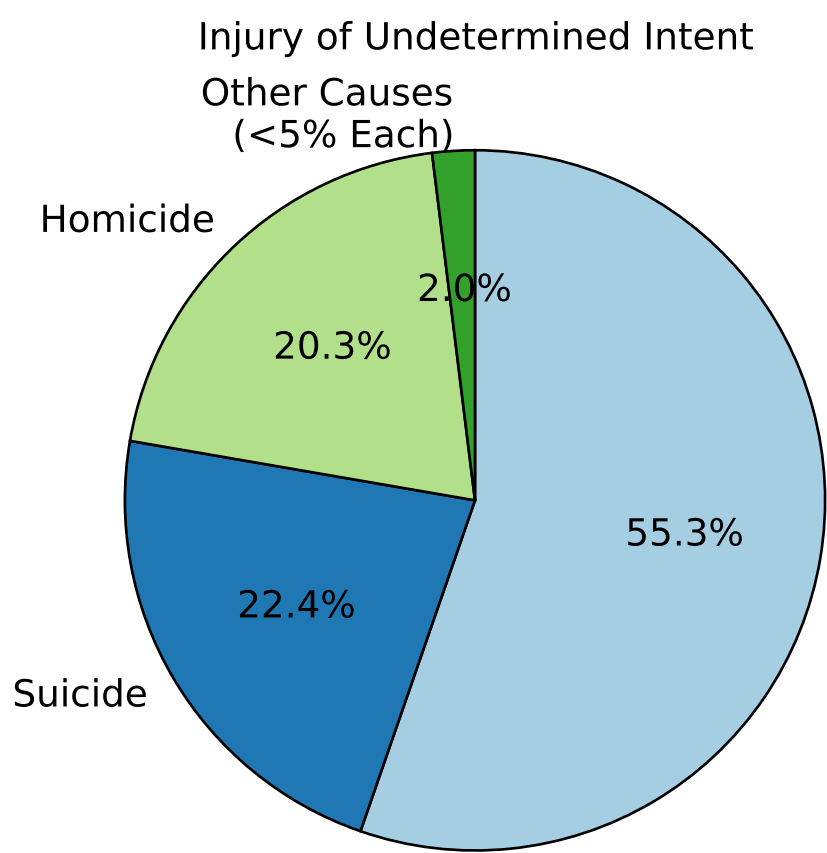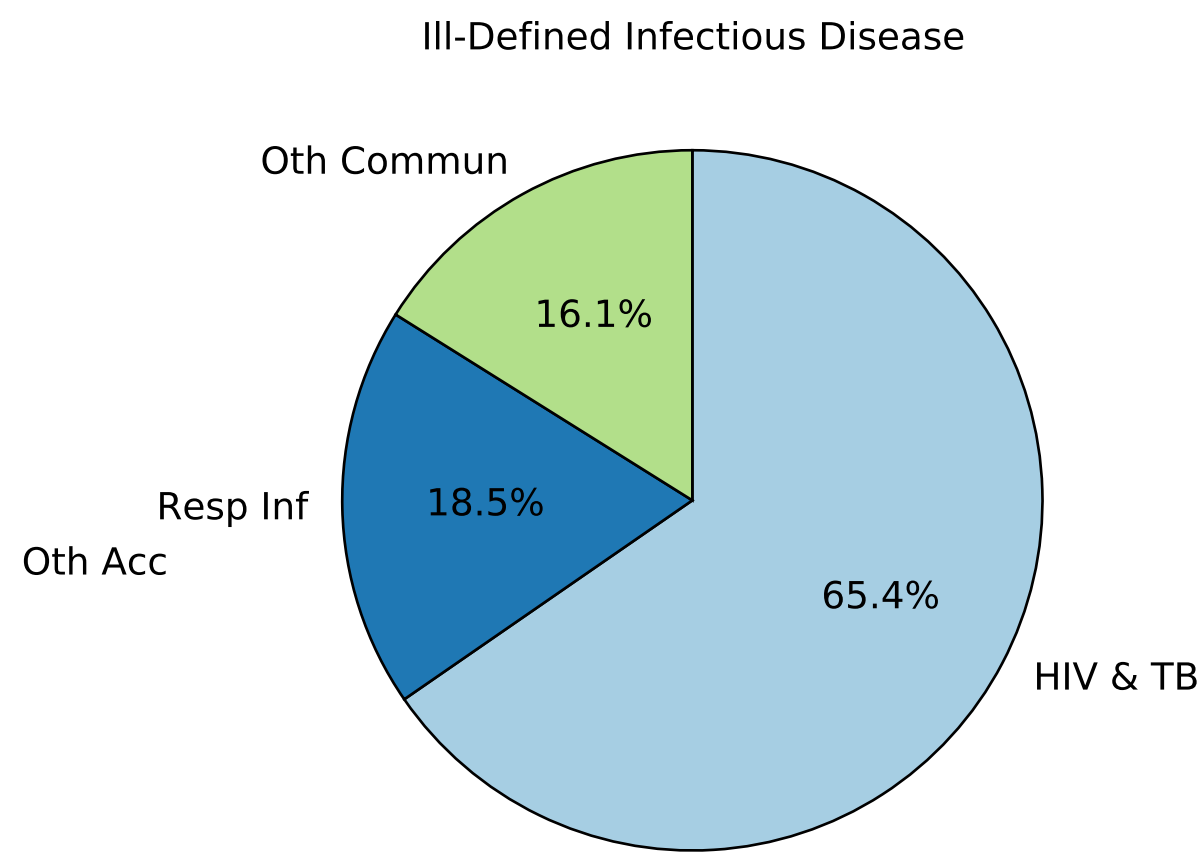

ICD 10  
Male, Age 30

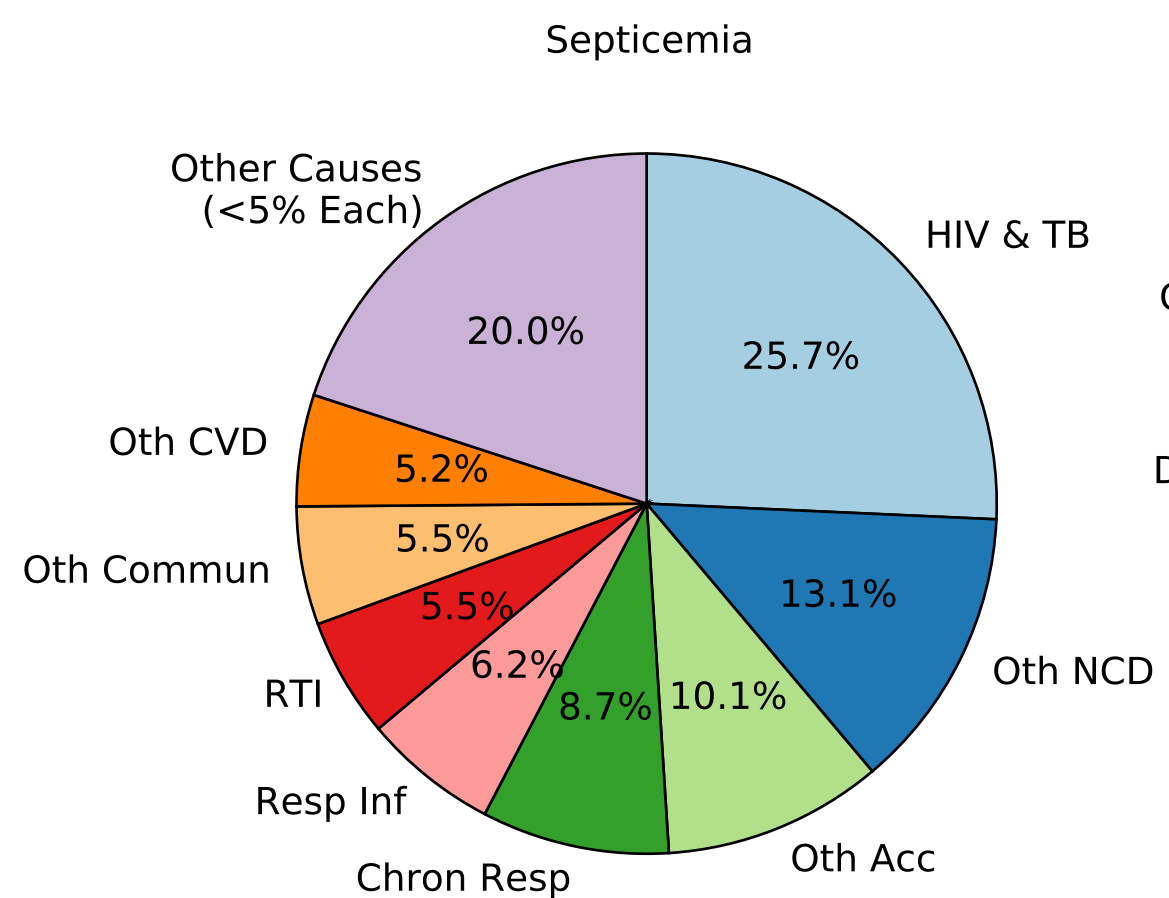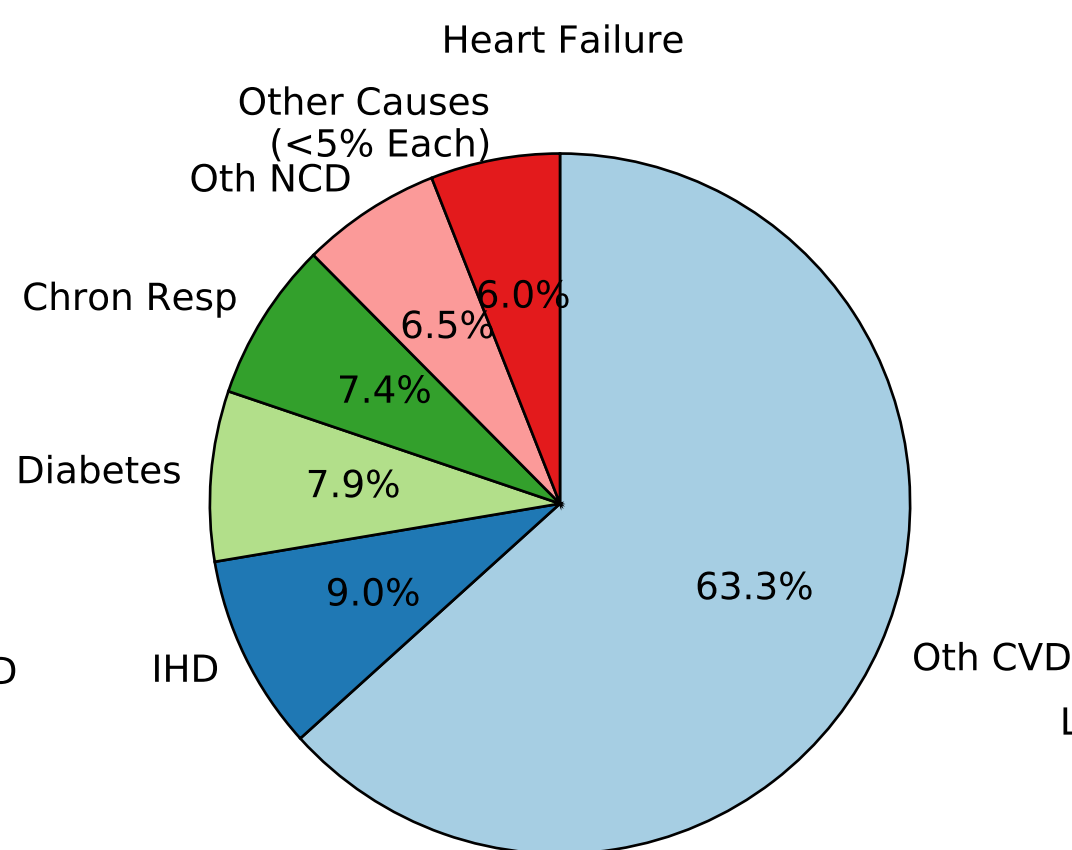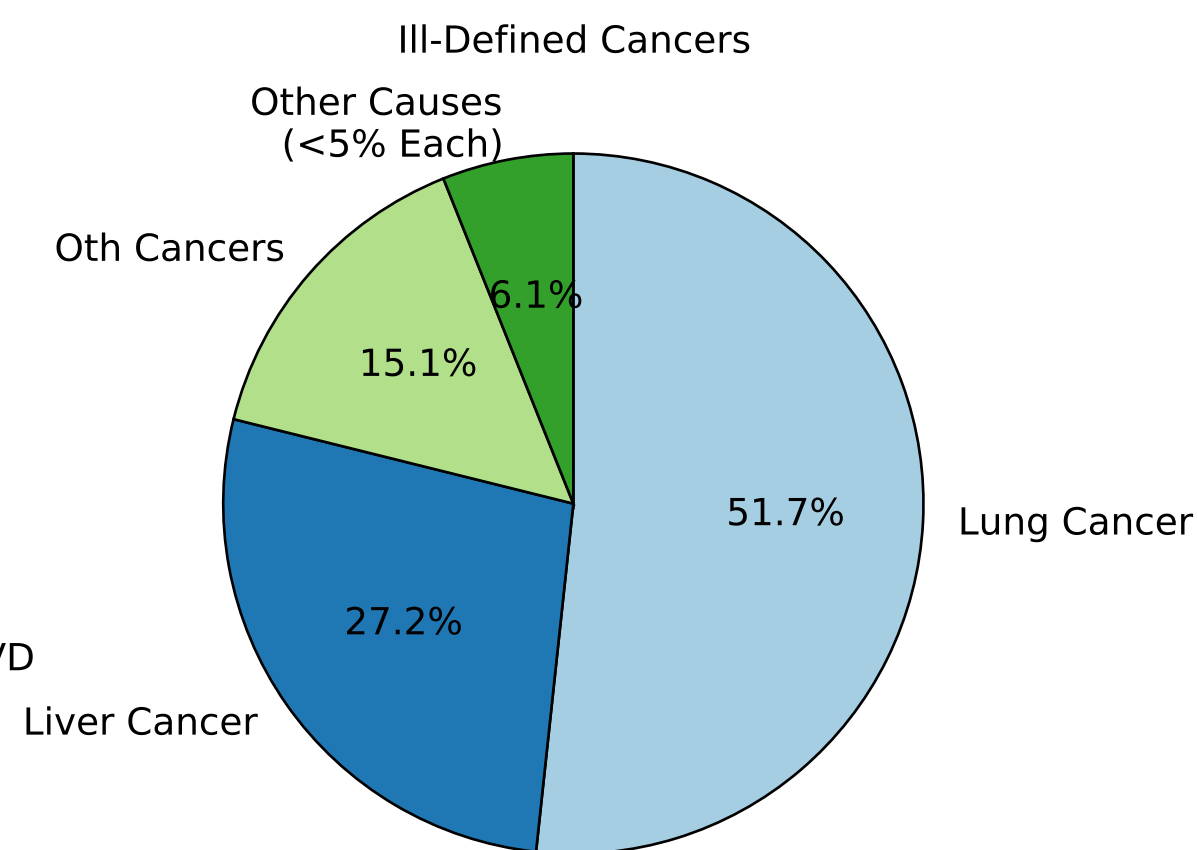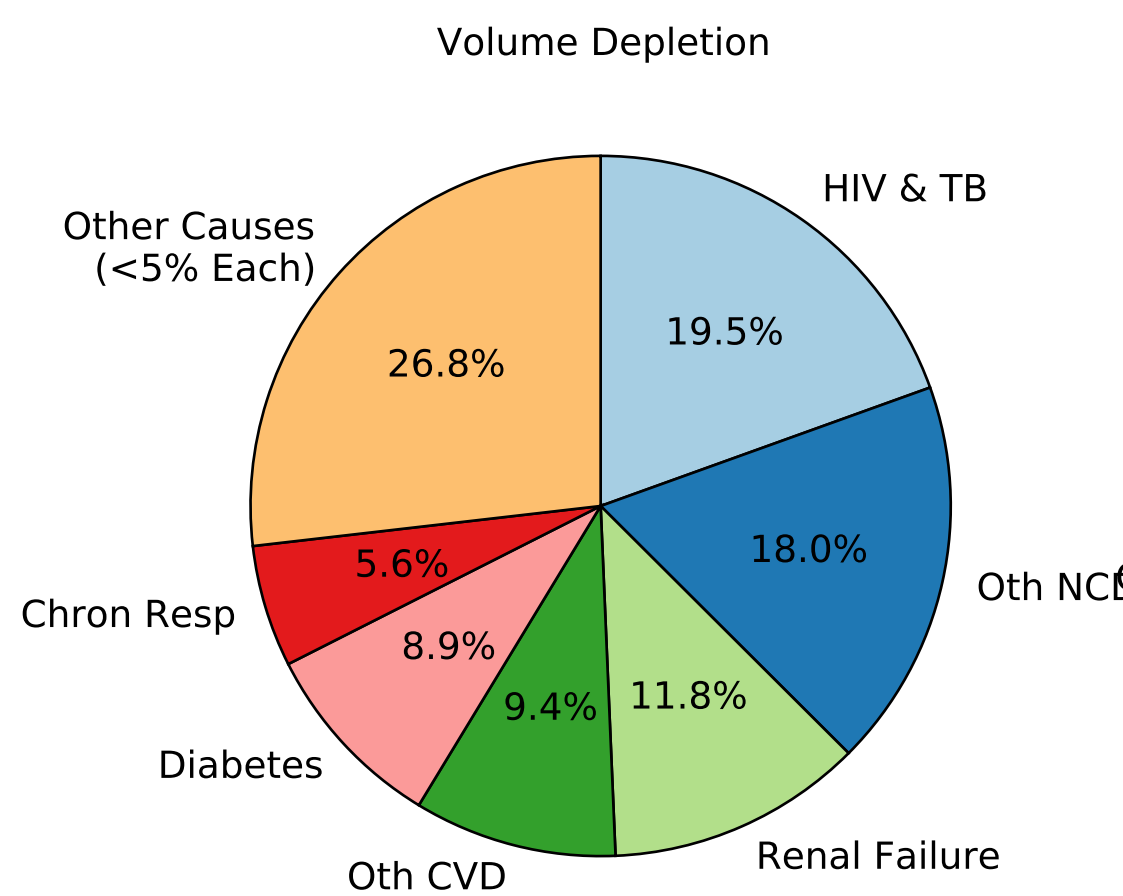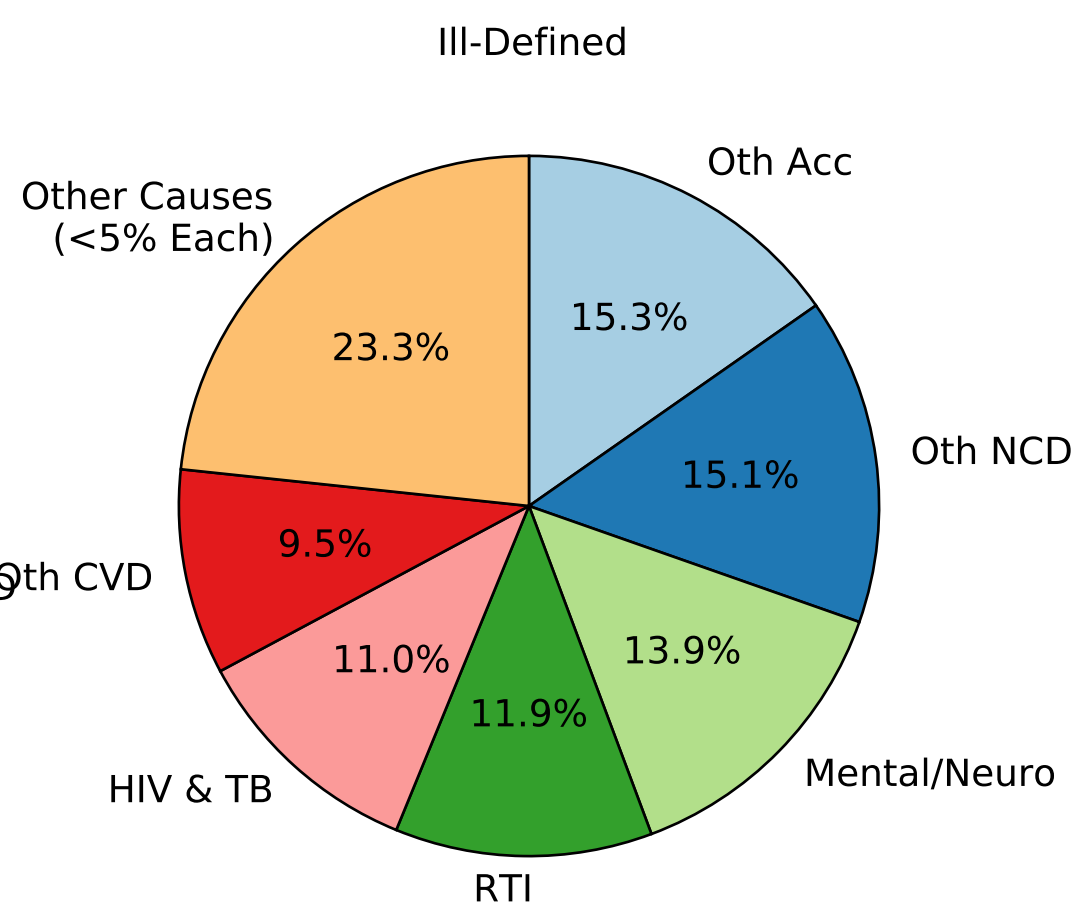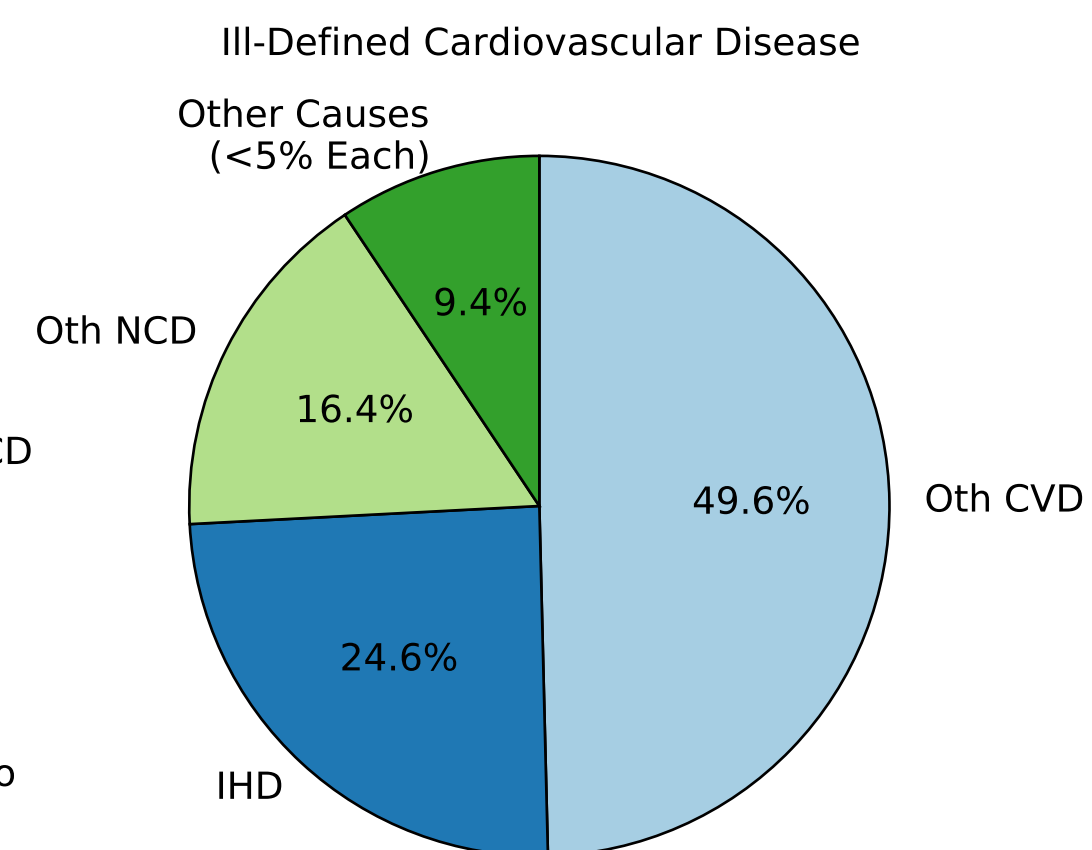

Ill-Defined Injury

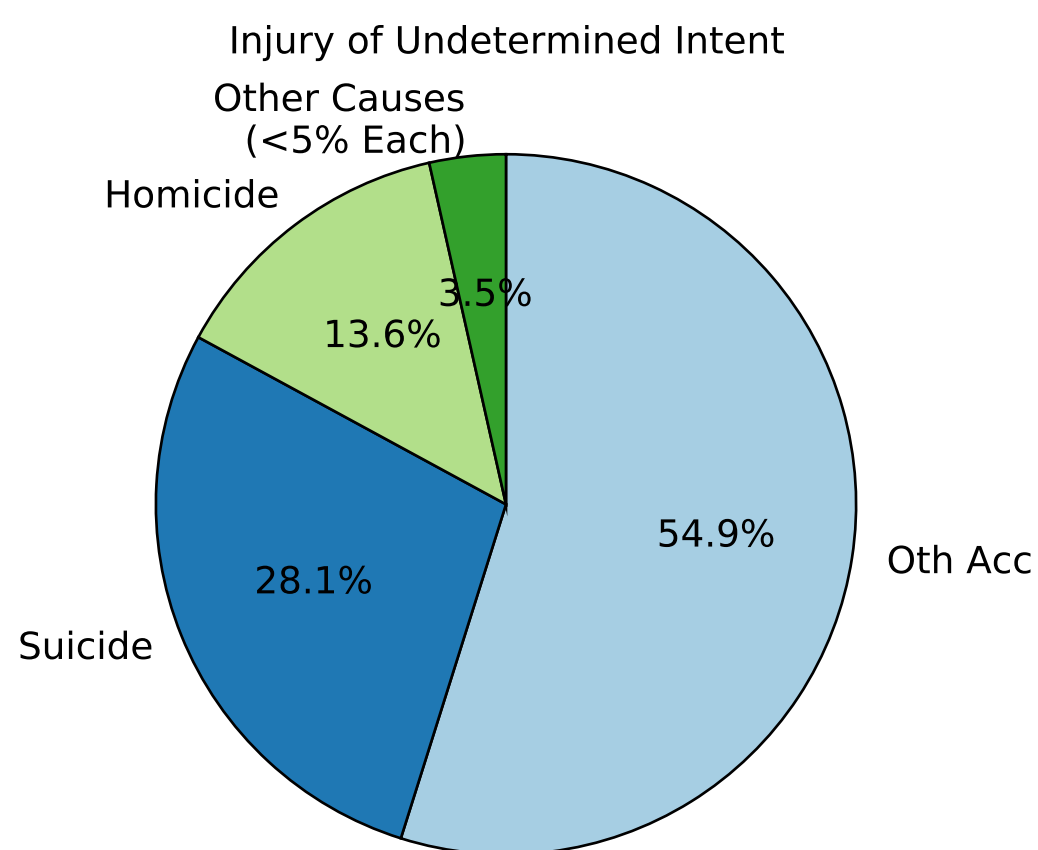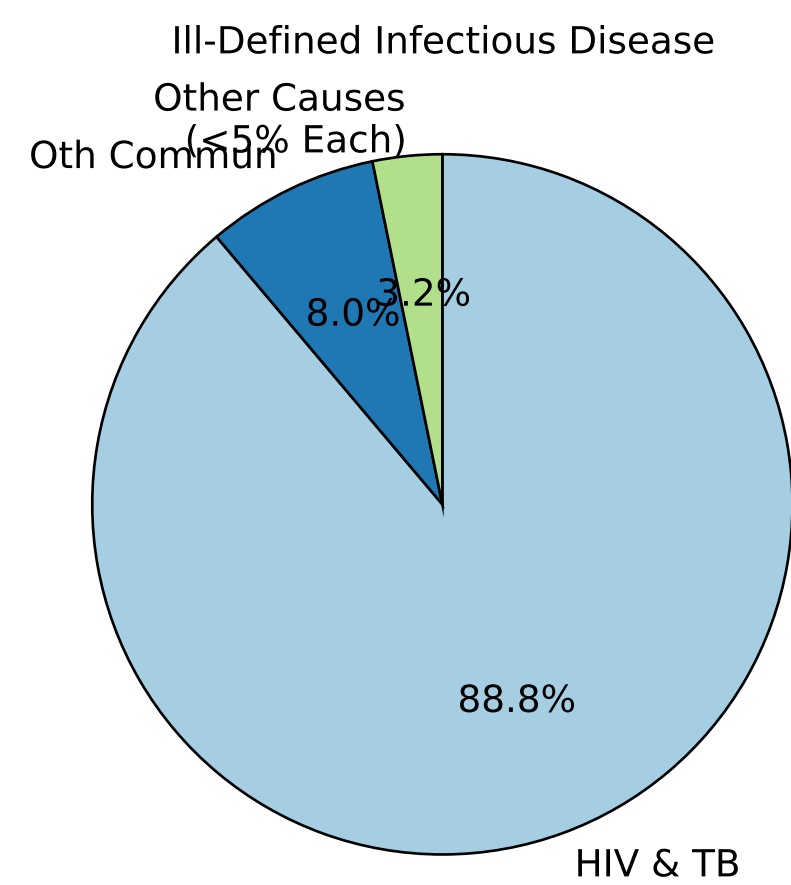

ICD 10  
Male, Age 35

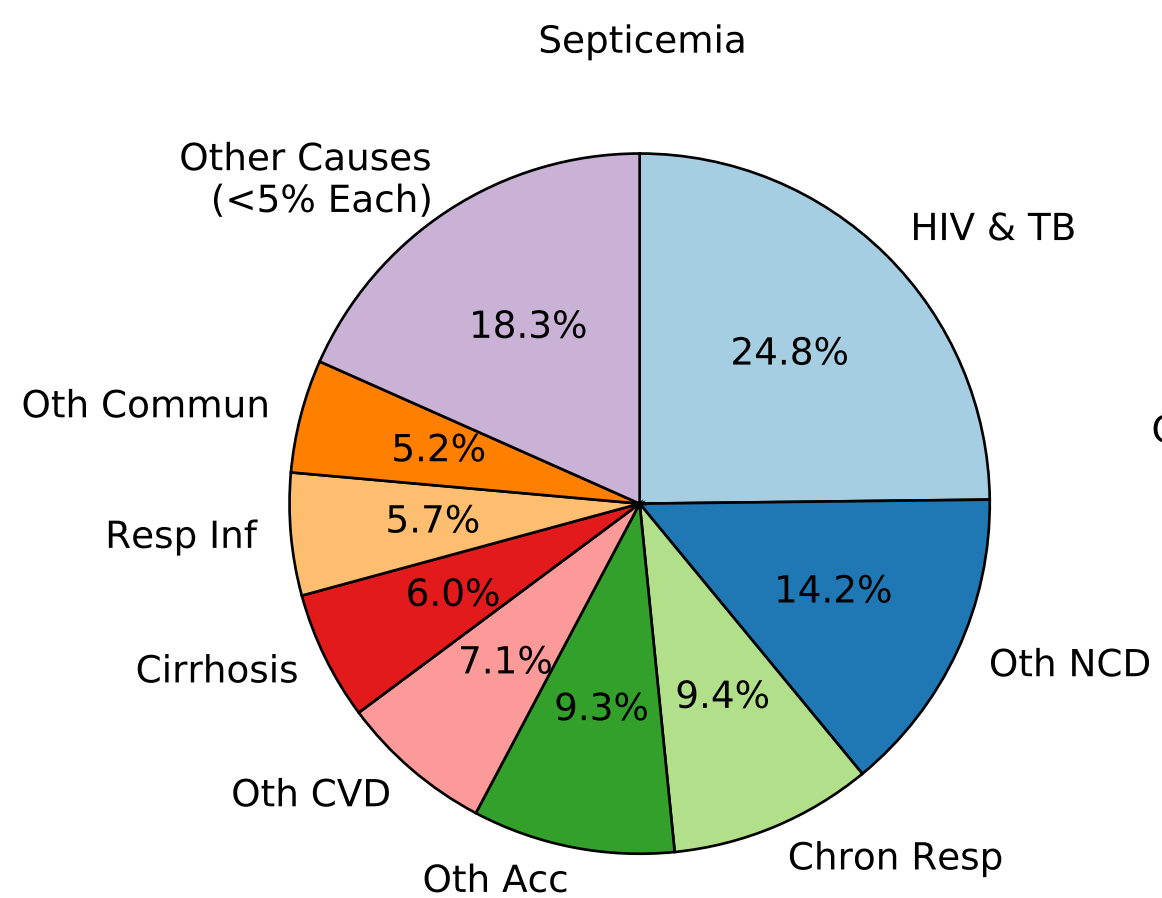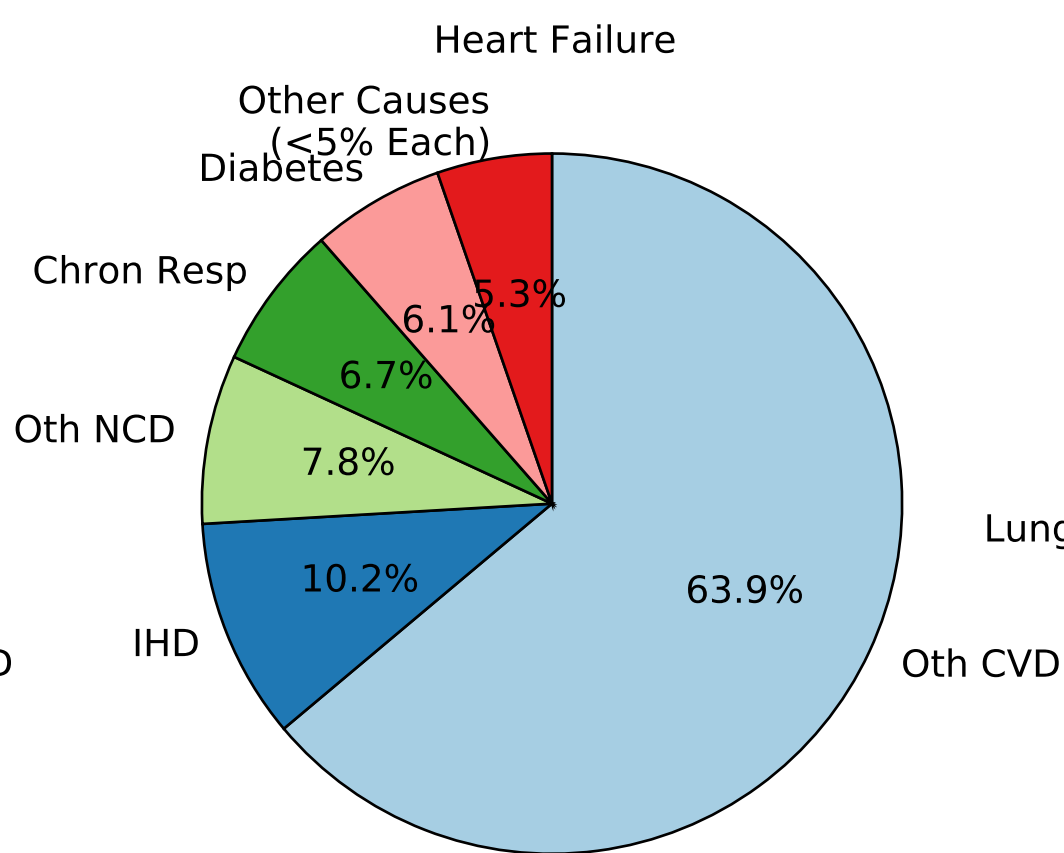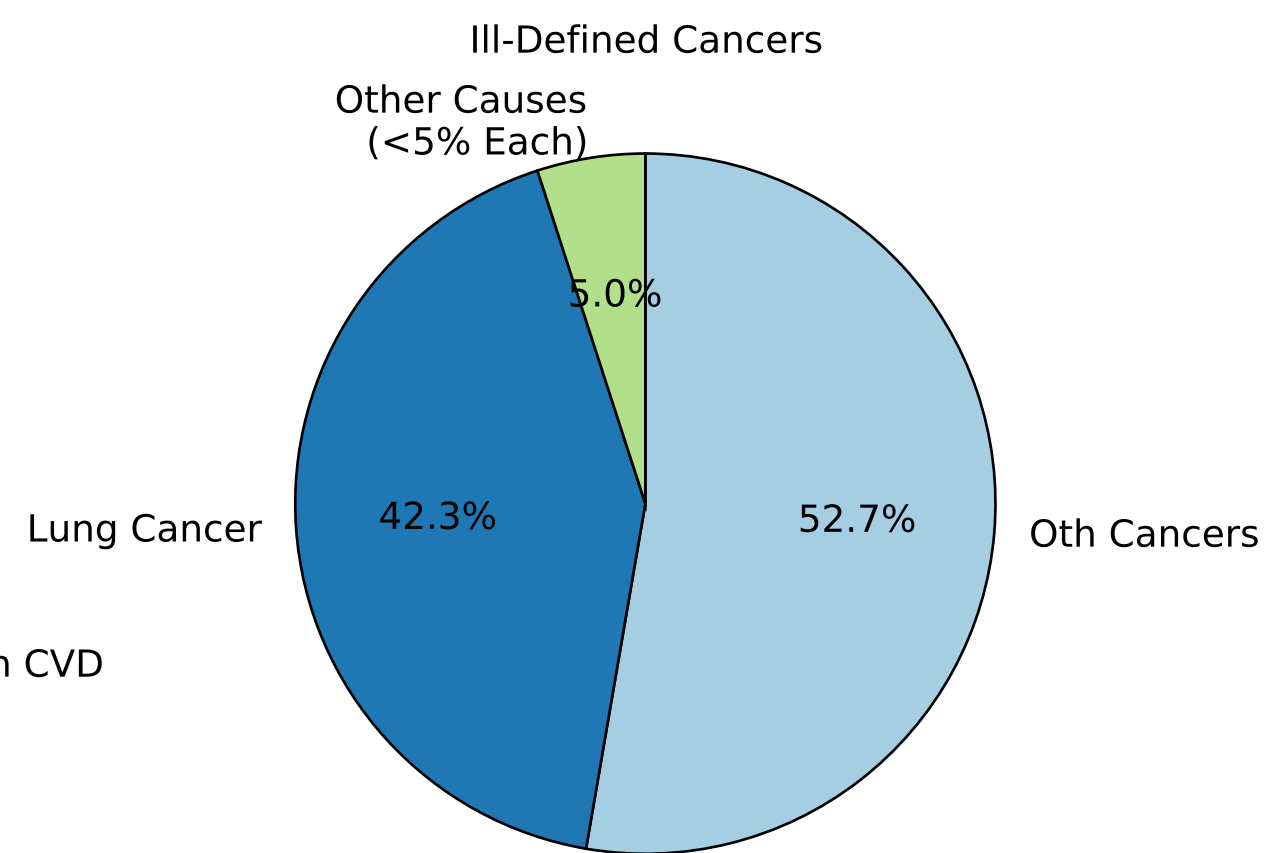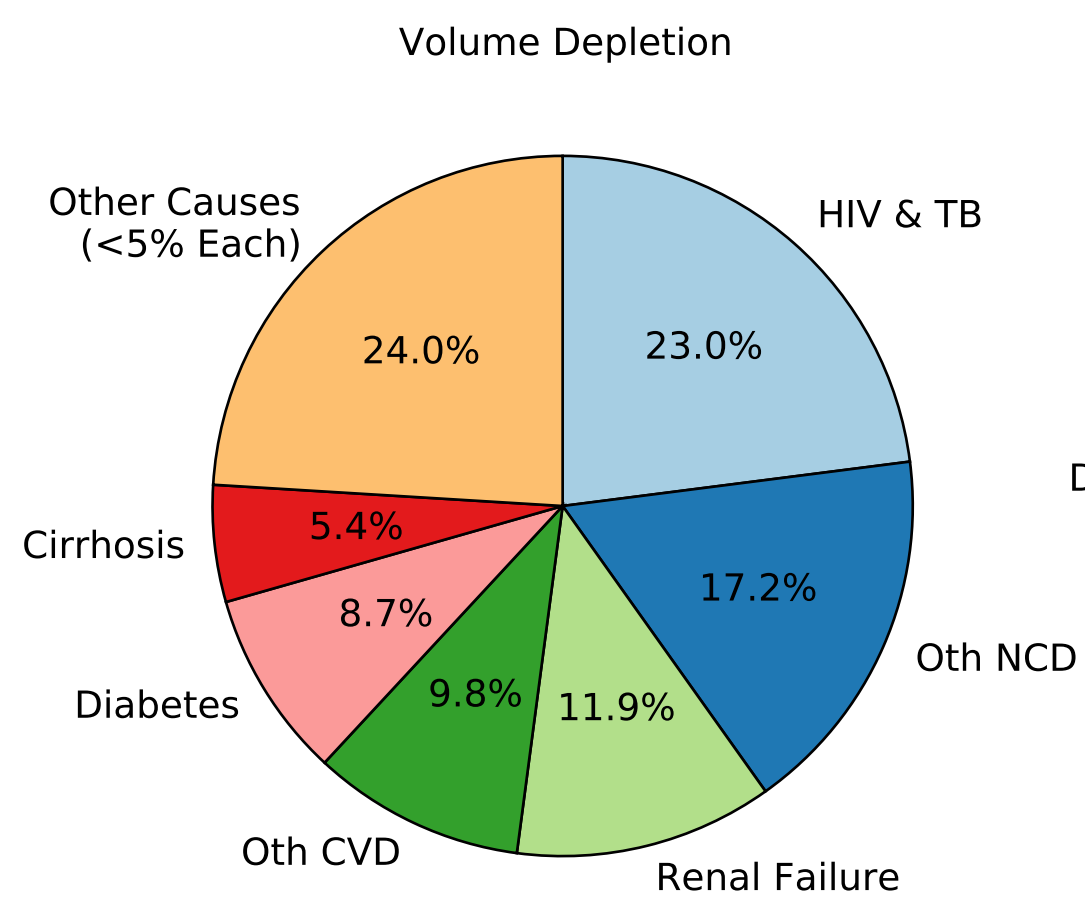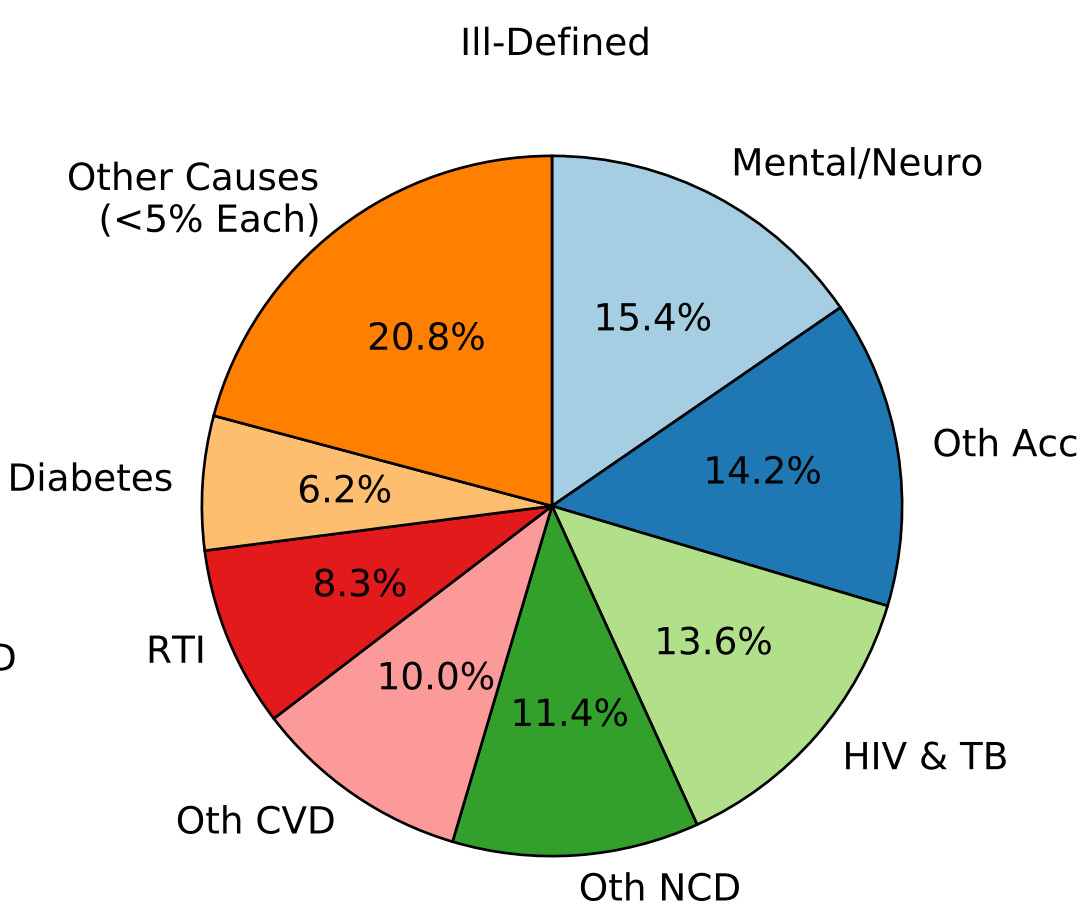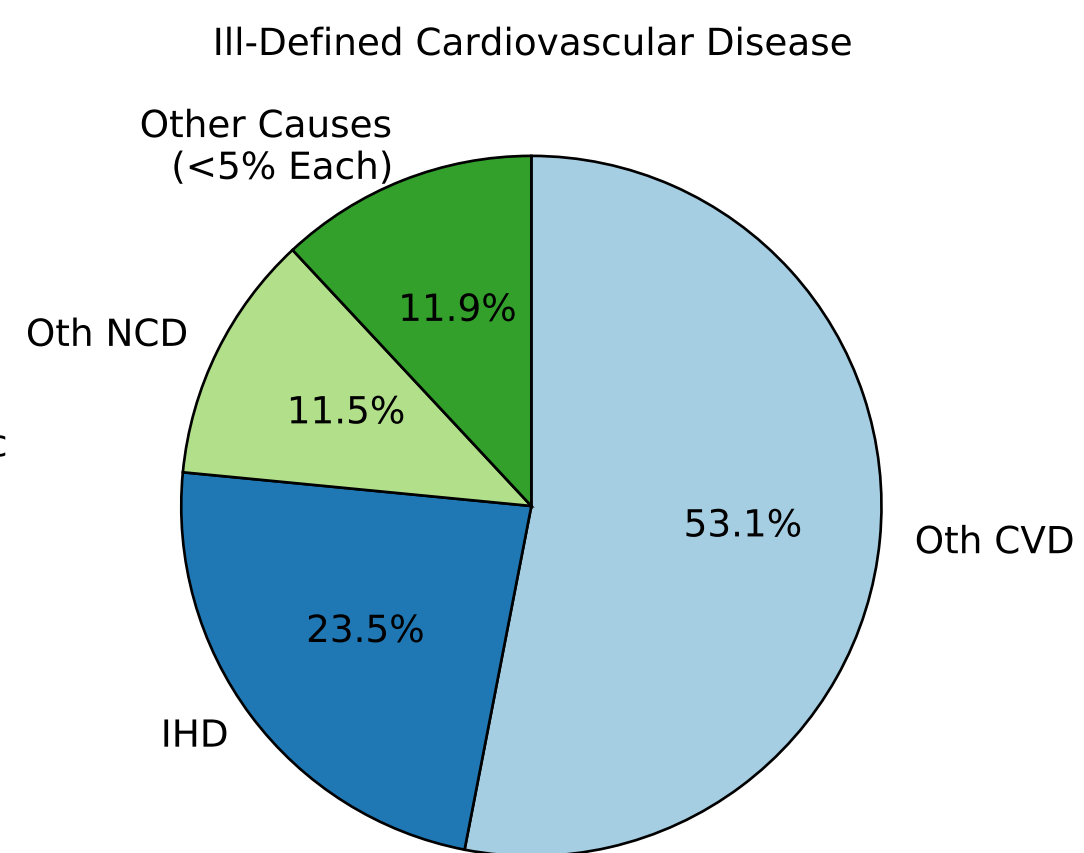

Ill-Defined Injury

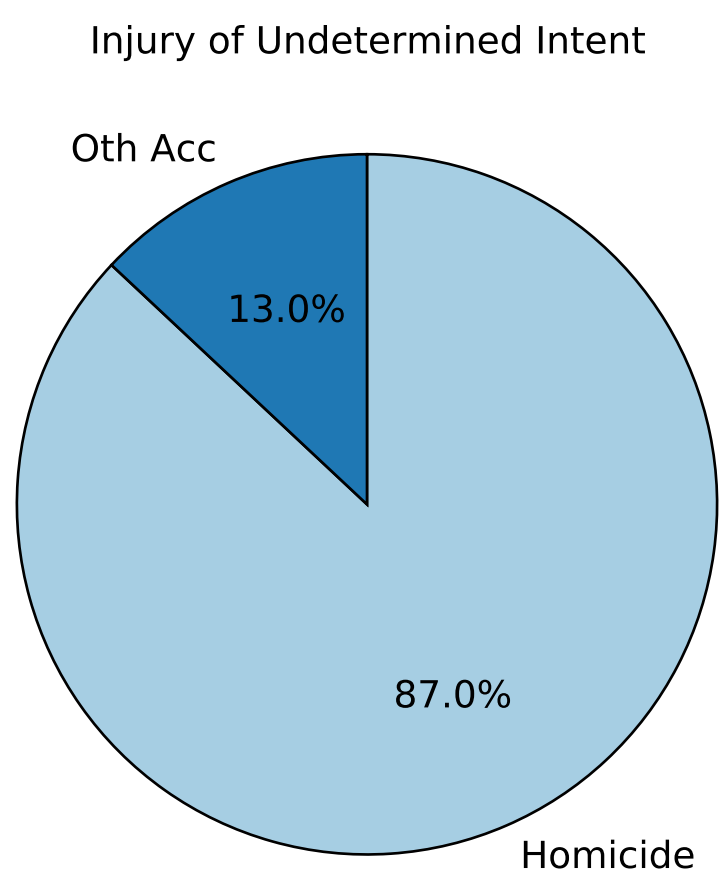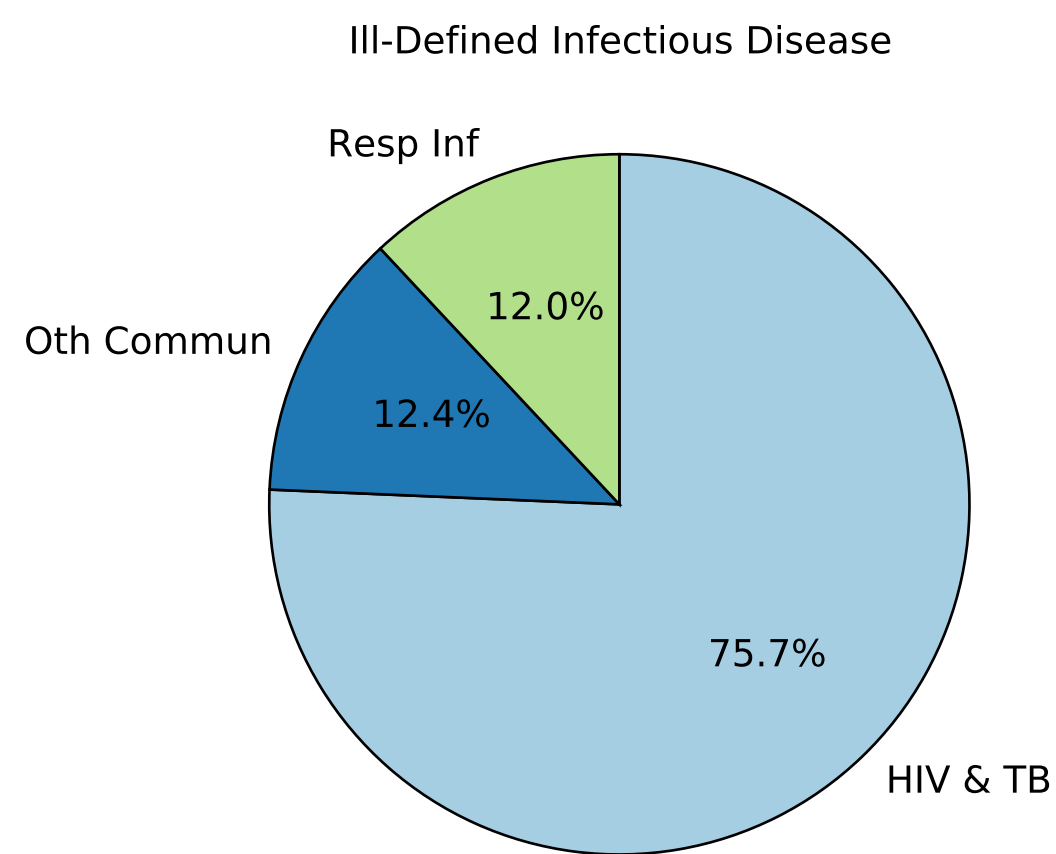

ICD 10  
Male, Age 40

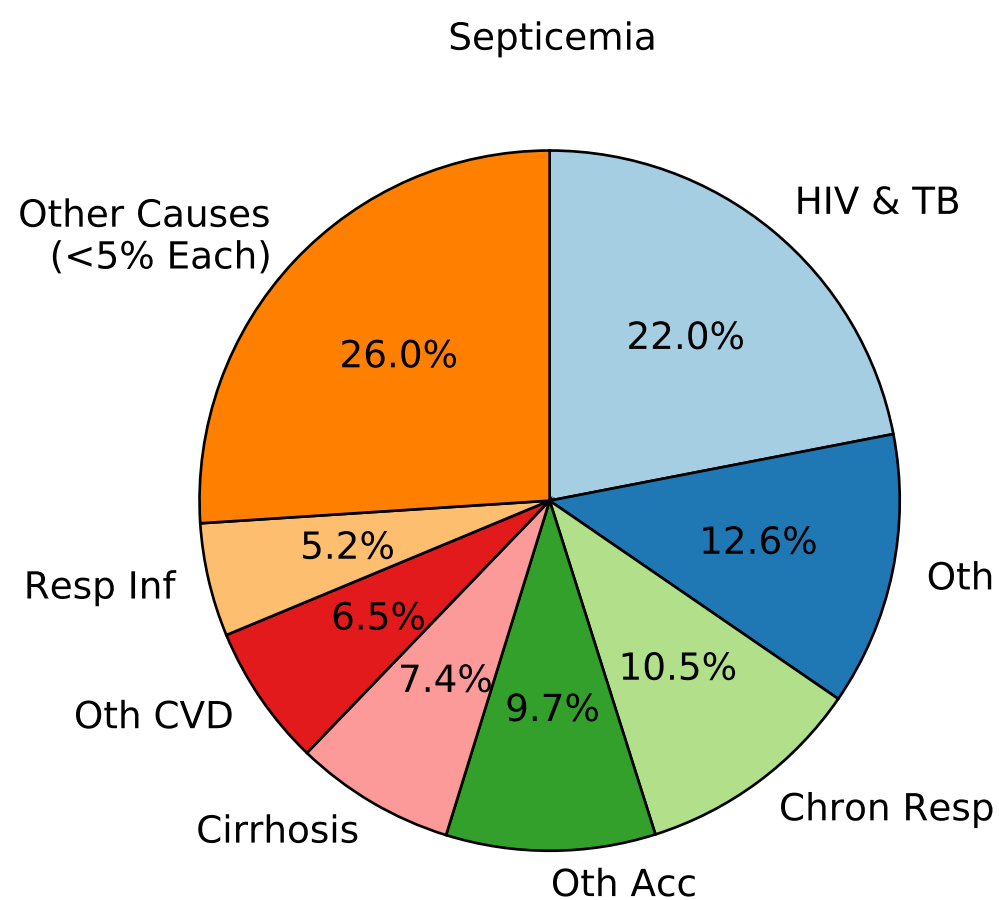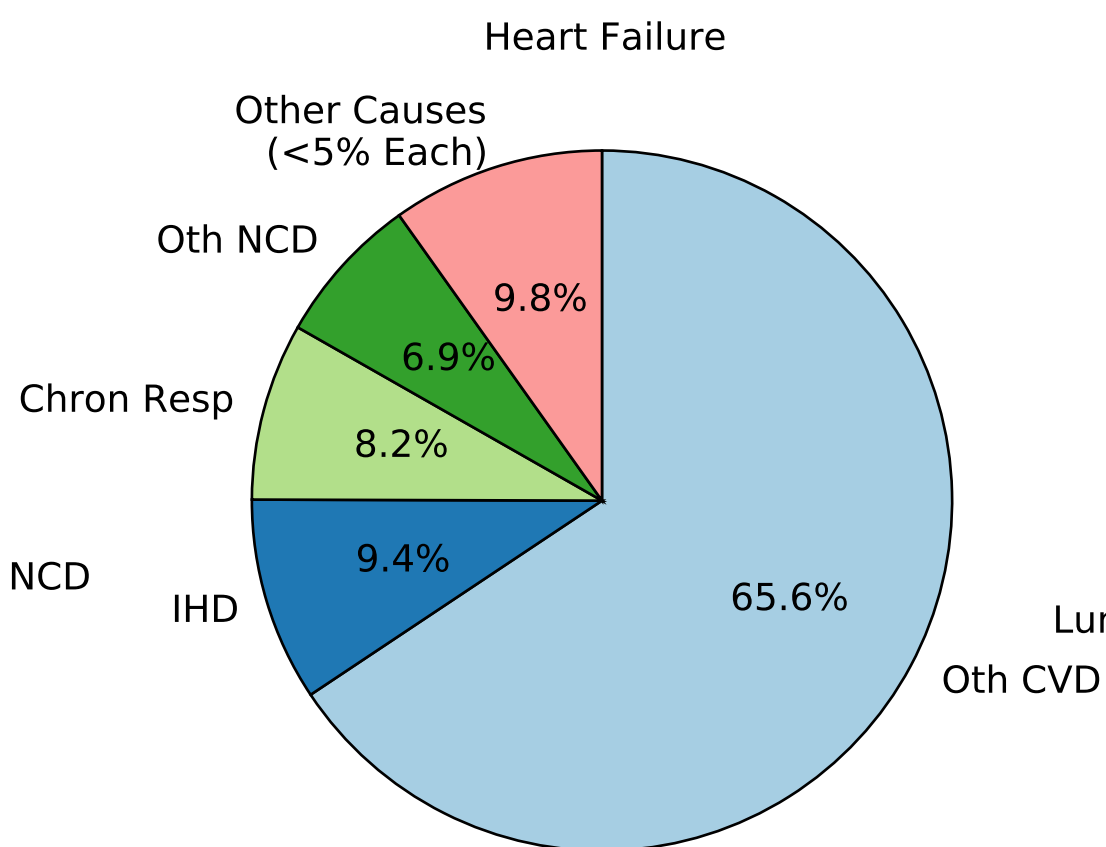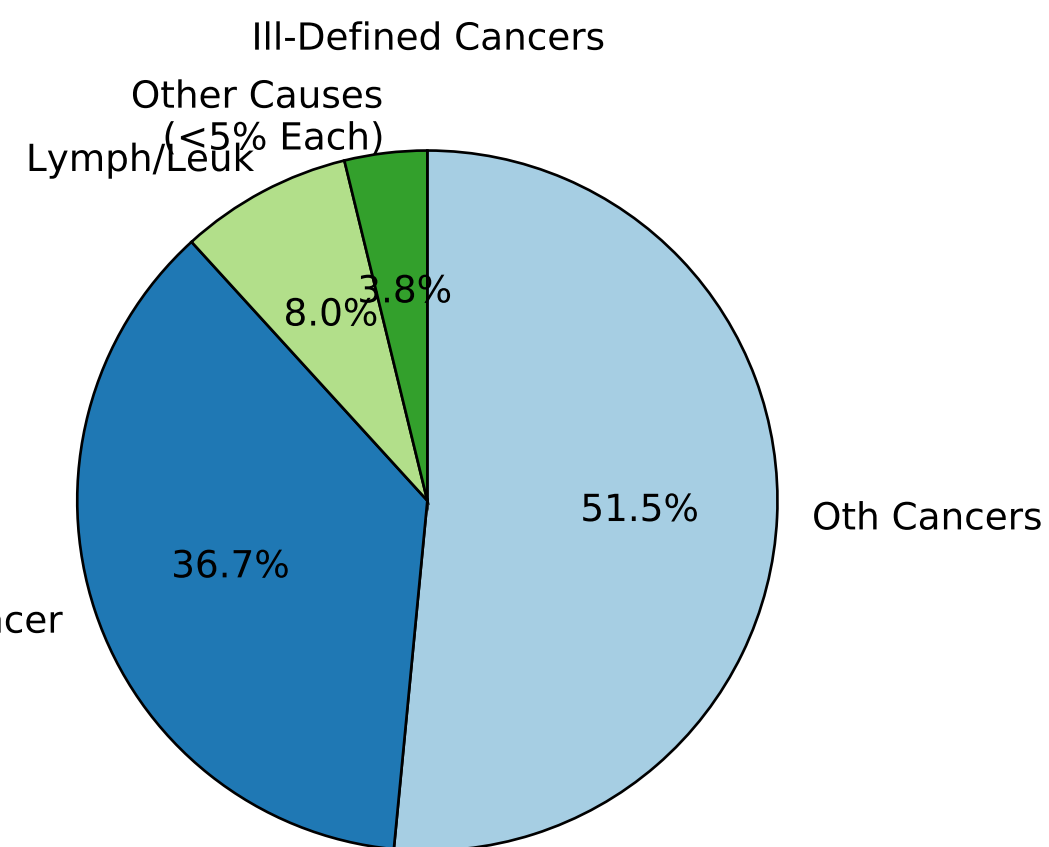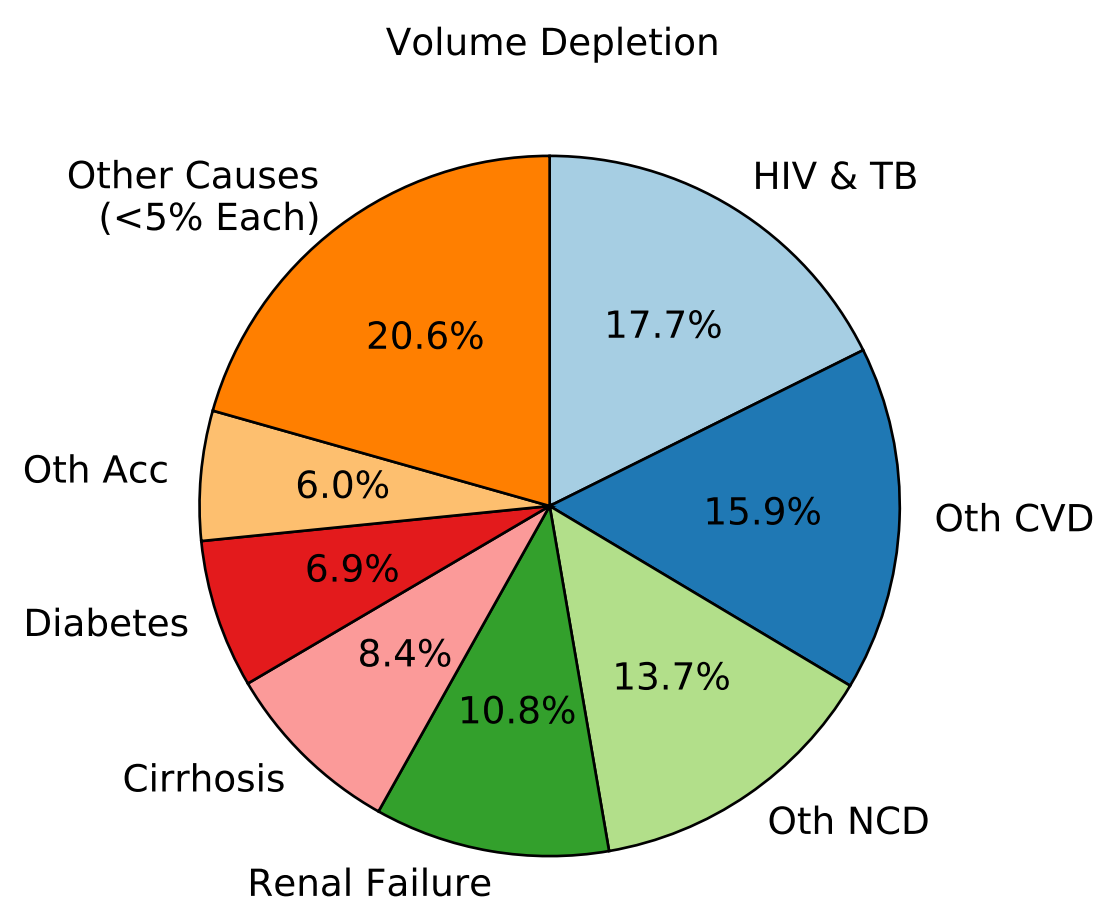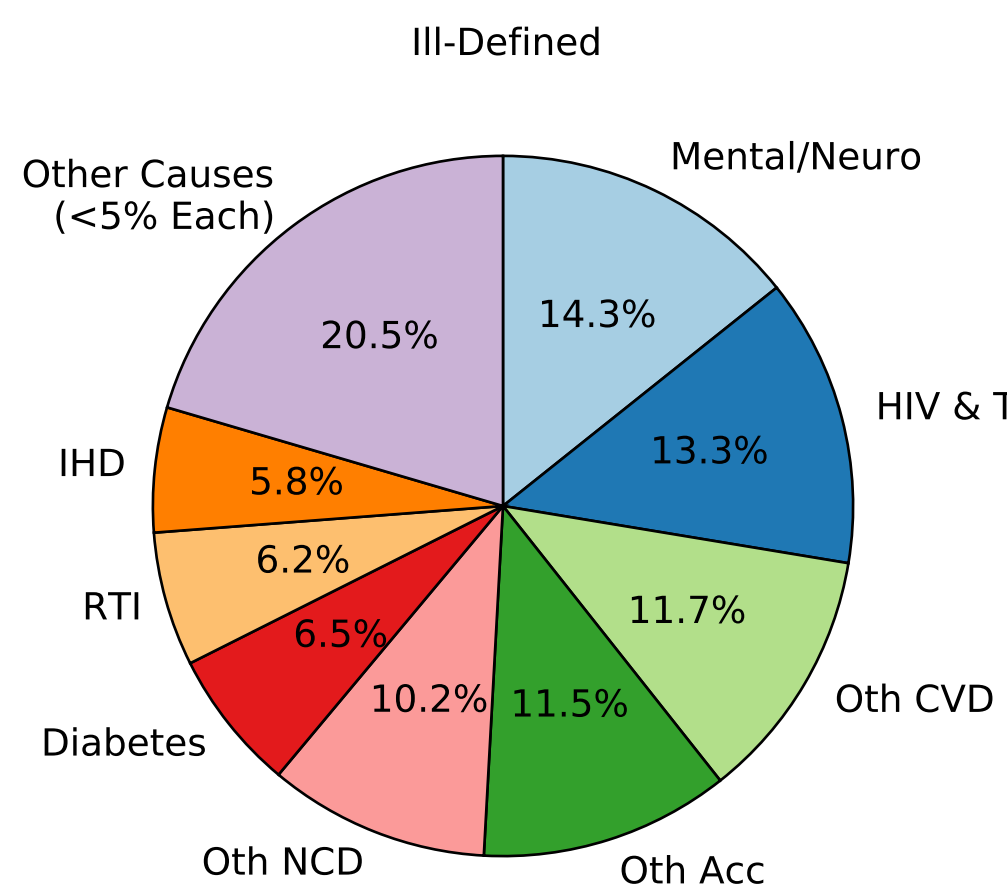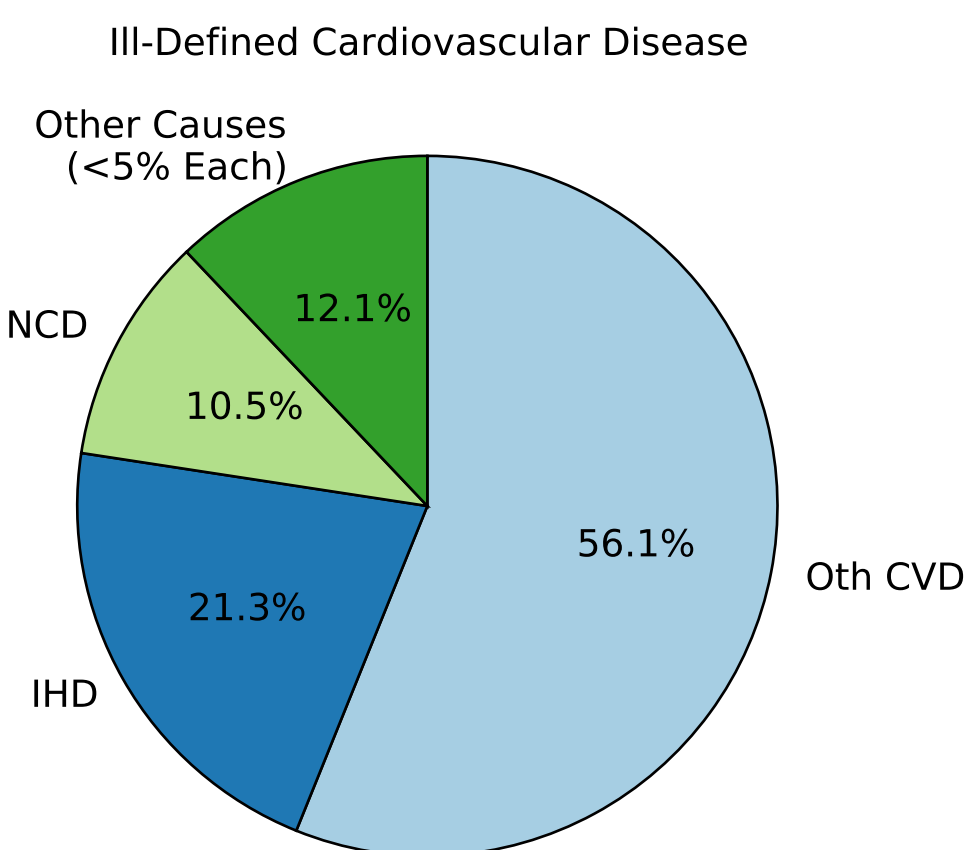

Ill-Defined Injury

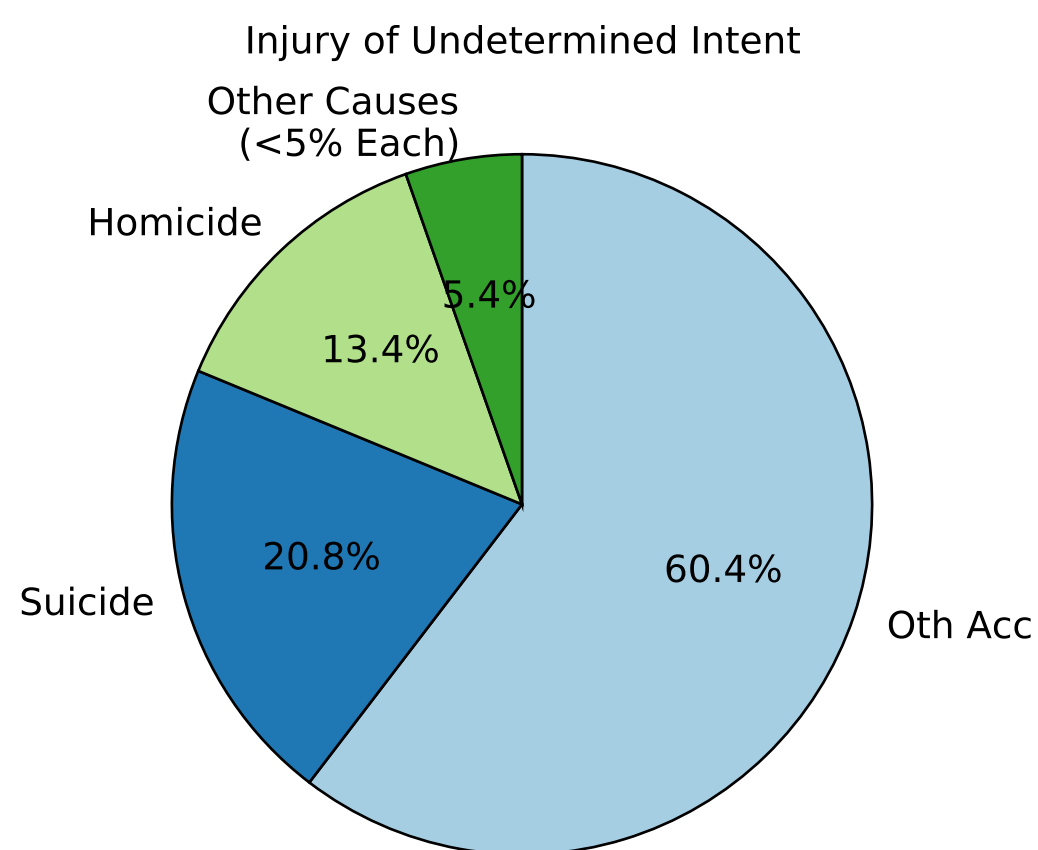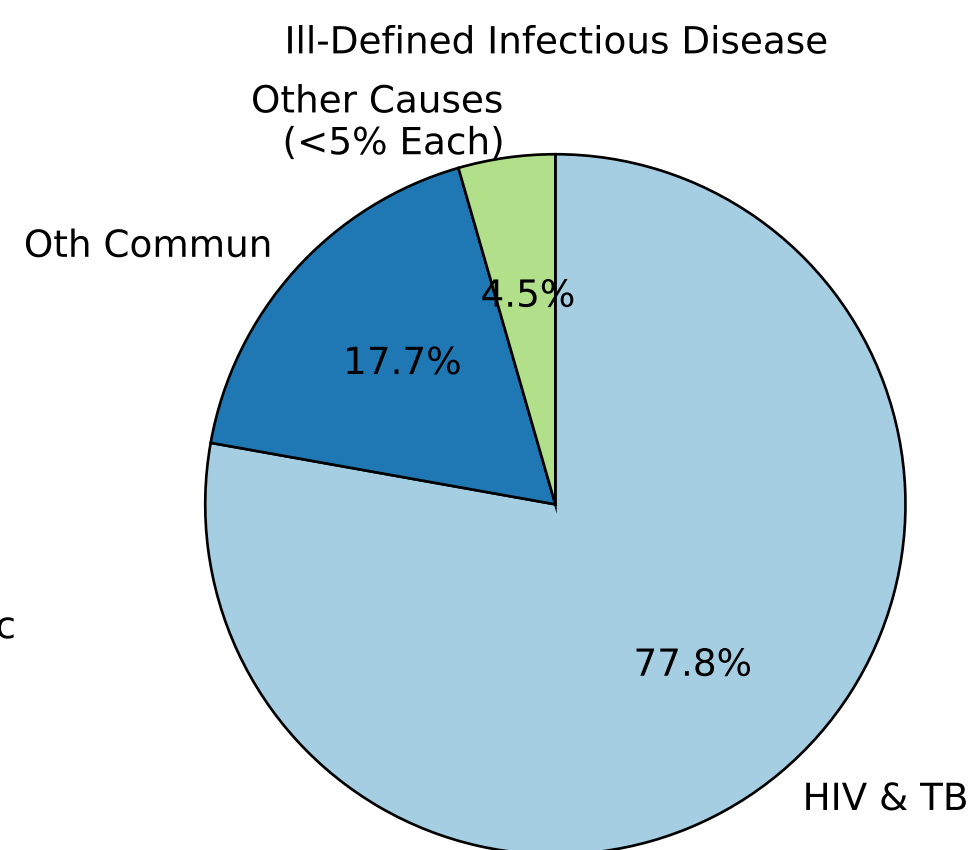

ICD 10  
Male, Age 45

Septicemia

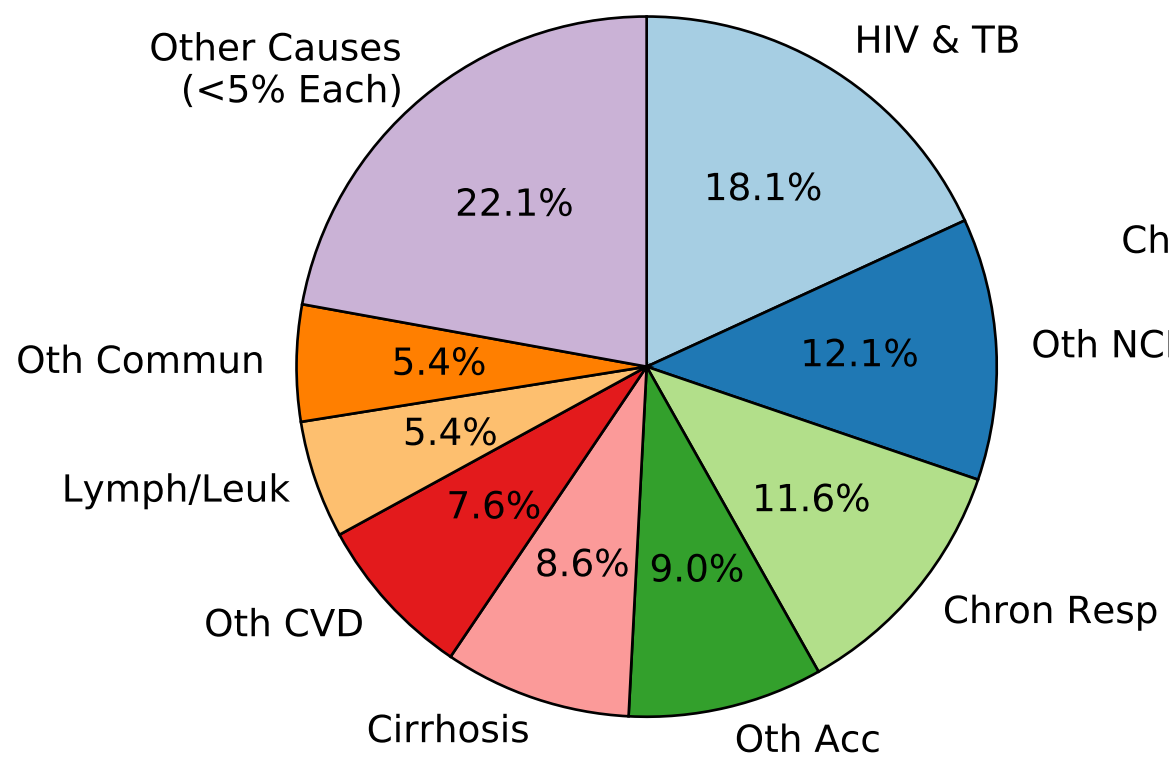

Heart Failure

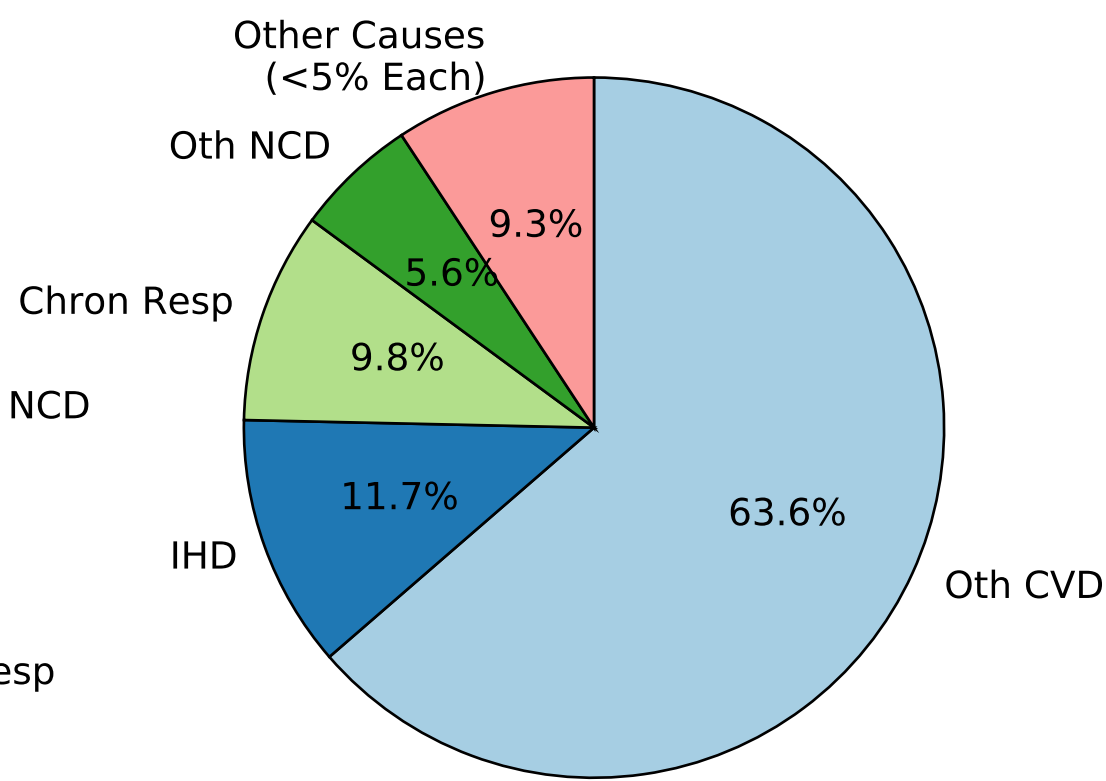

Ill-Defined Cancers

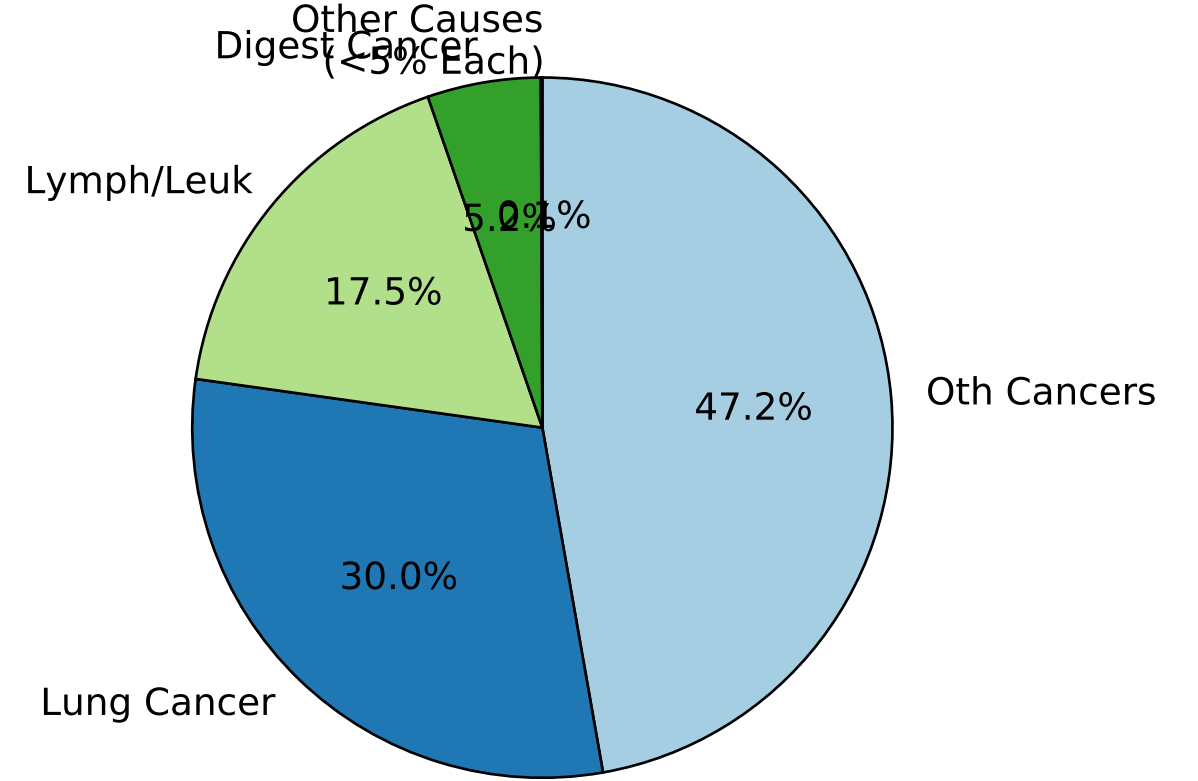

Volume Depletion

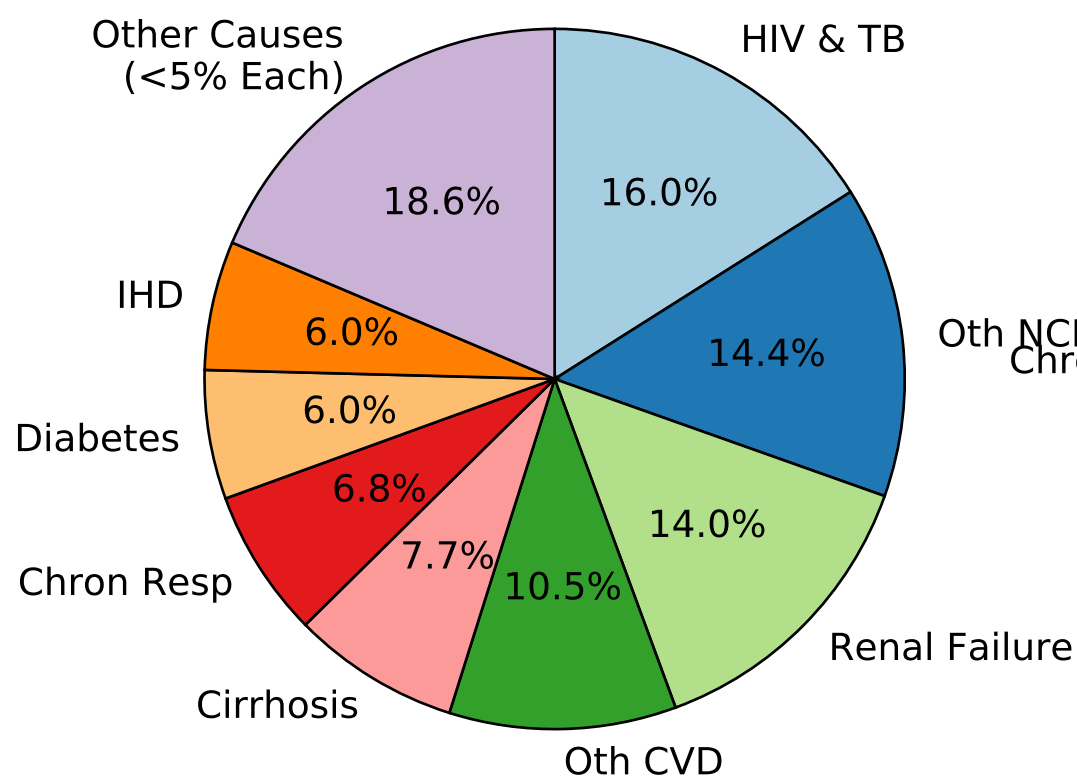

Ill-Defined

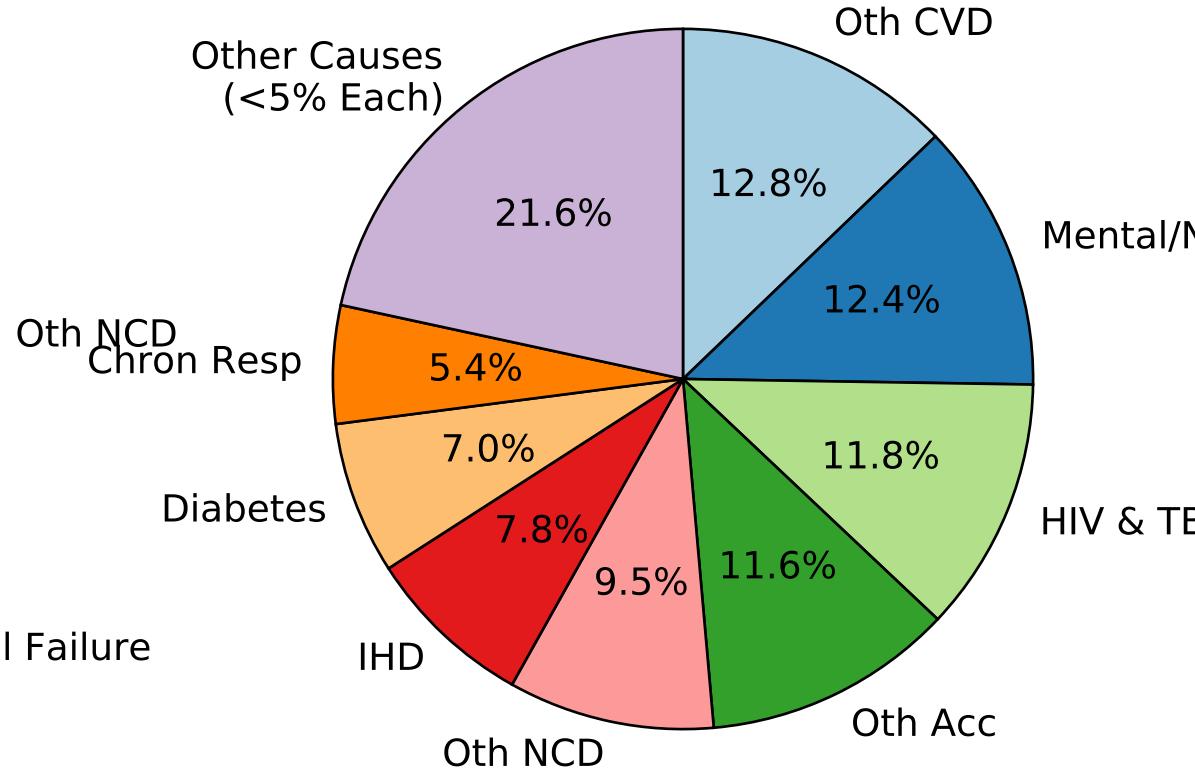

Ill-Defined Cardiovascular Disease

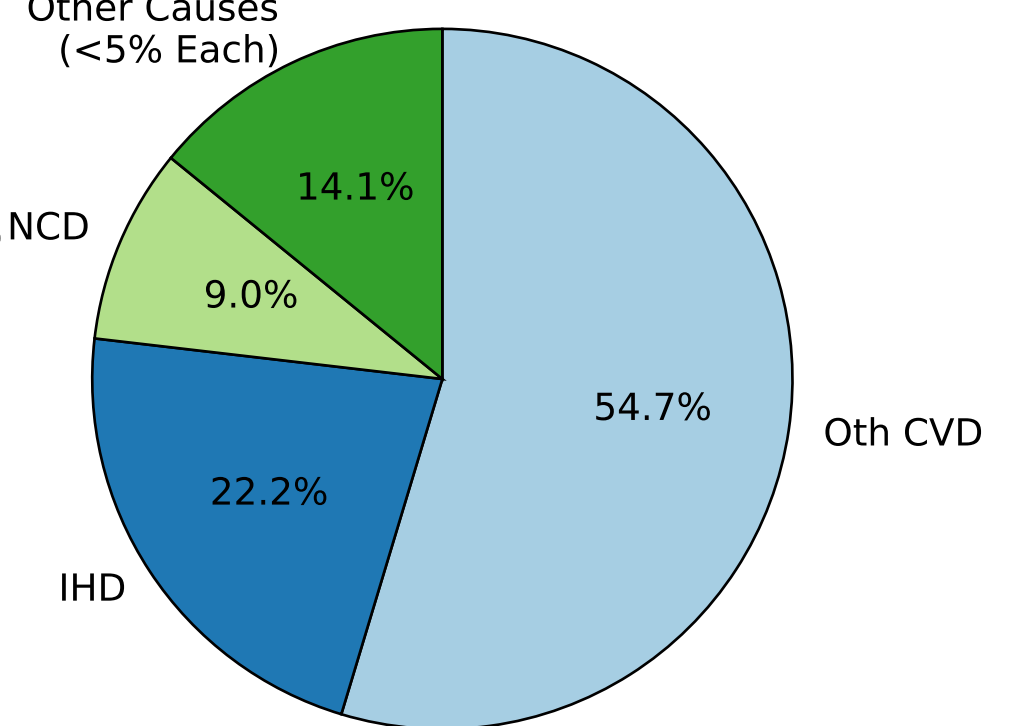

Ill-Defined Injury

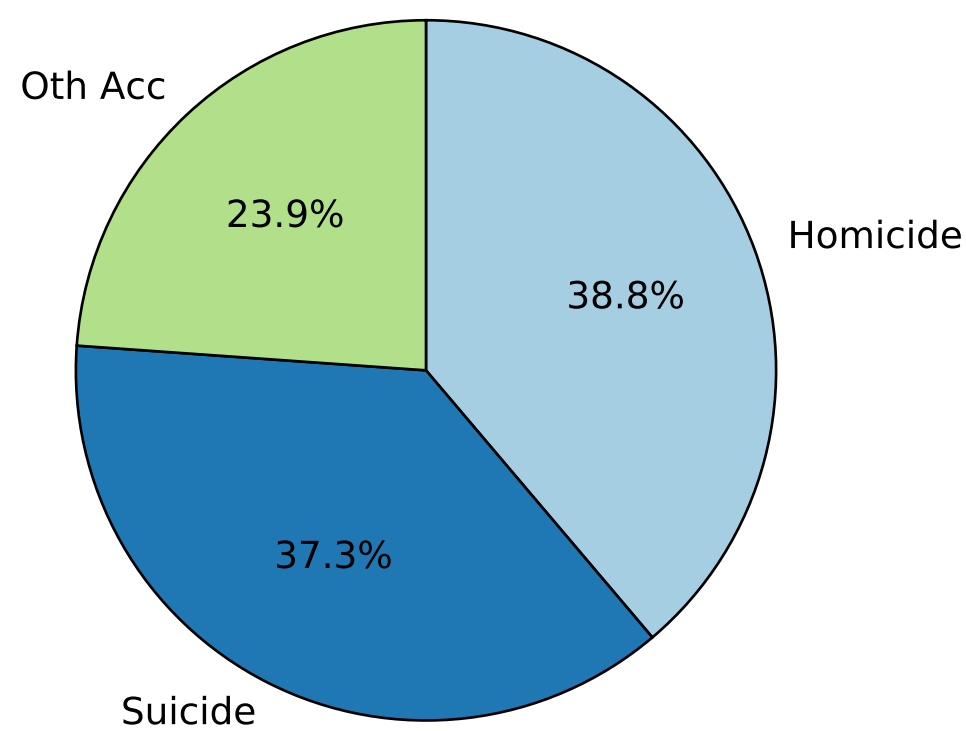

Injury of Undetermined Intent

Ill-Defined Infectious Disease

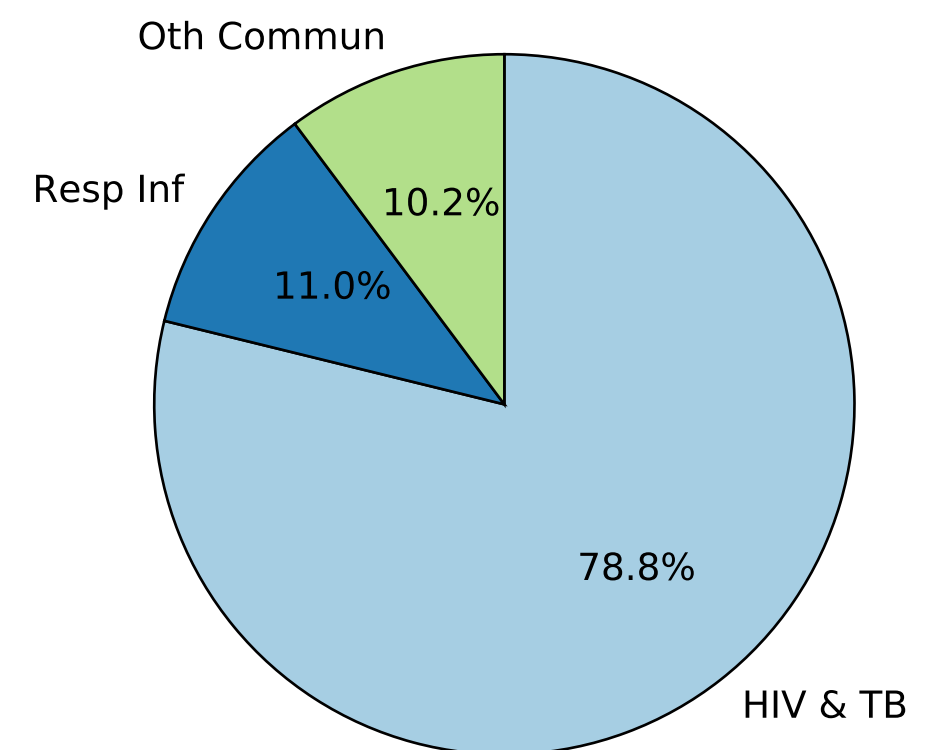



ICD 10  
Male, Age 50

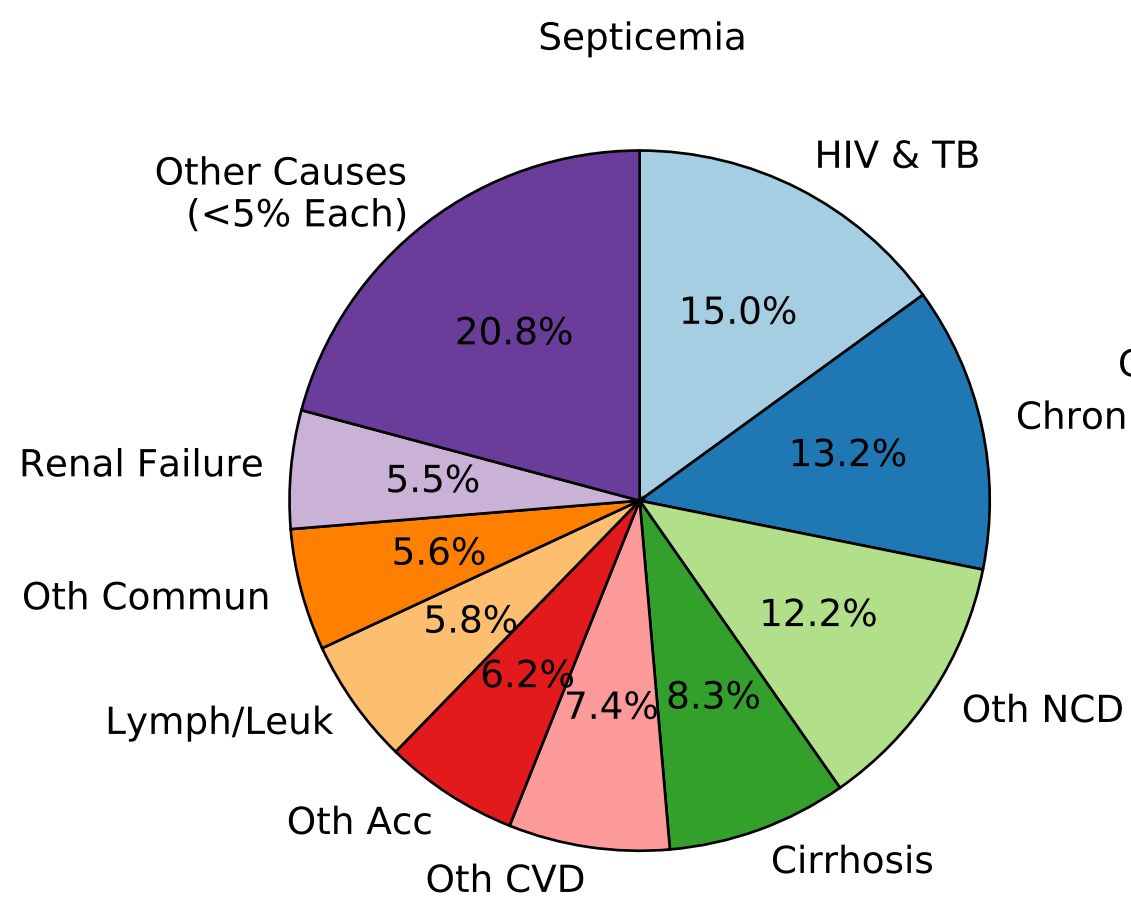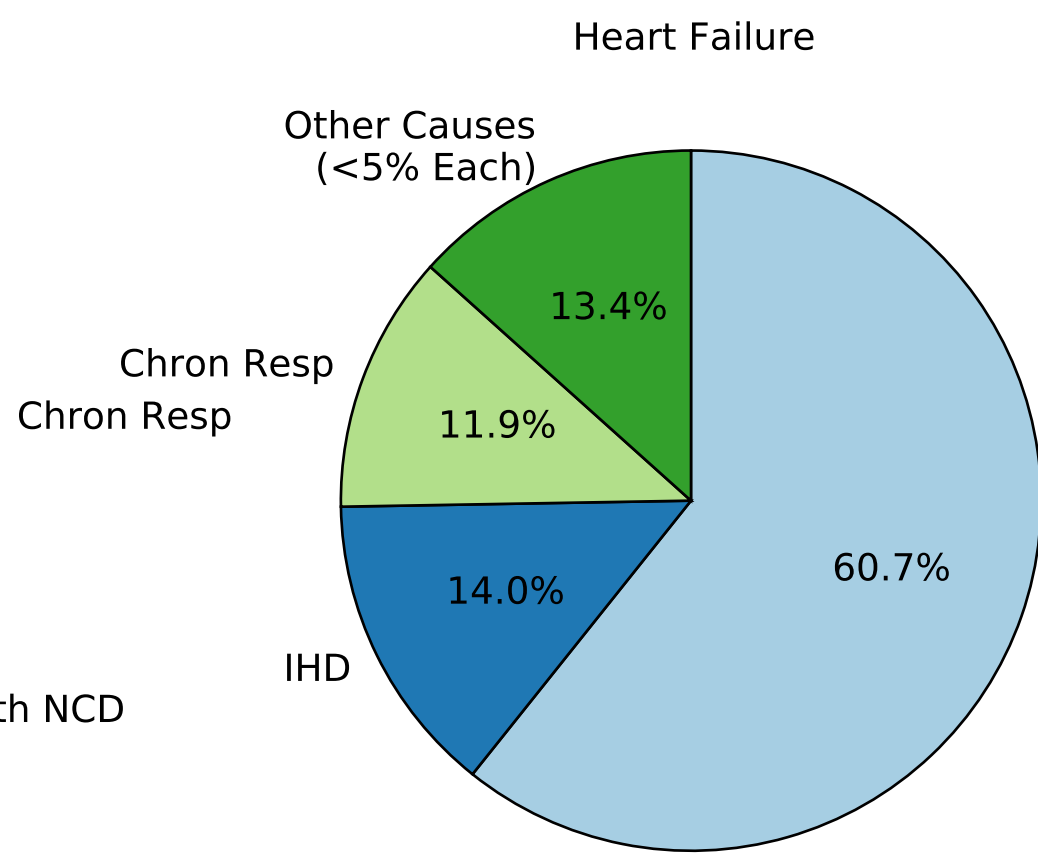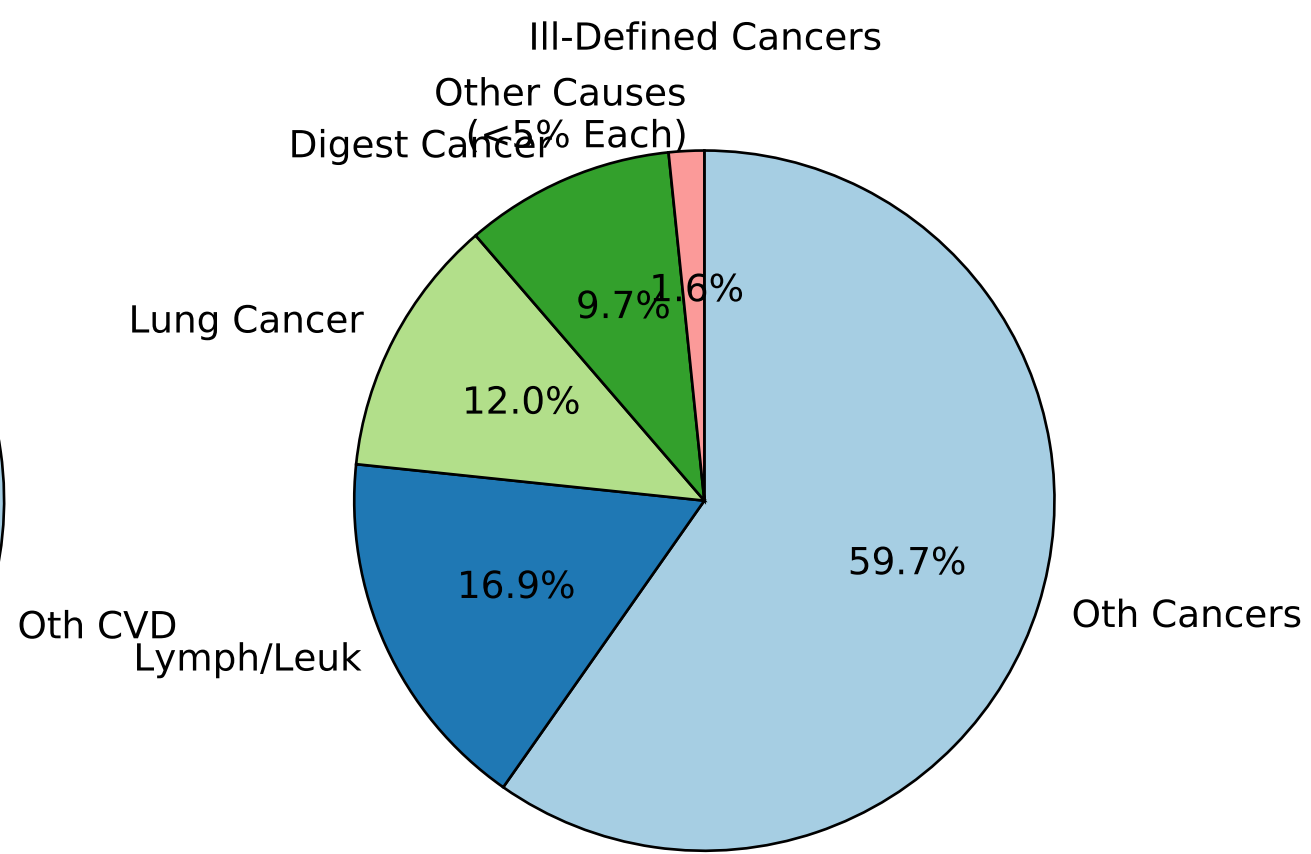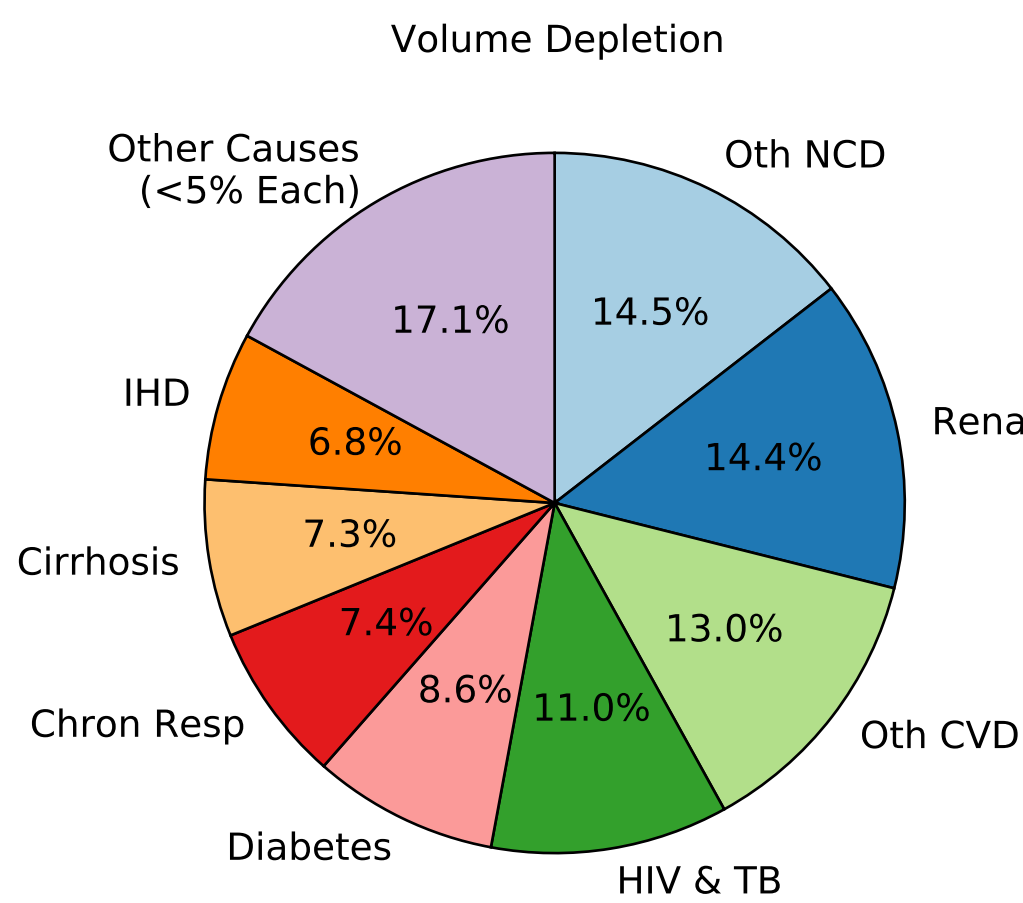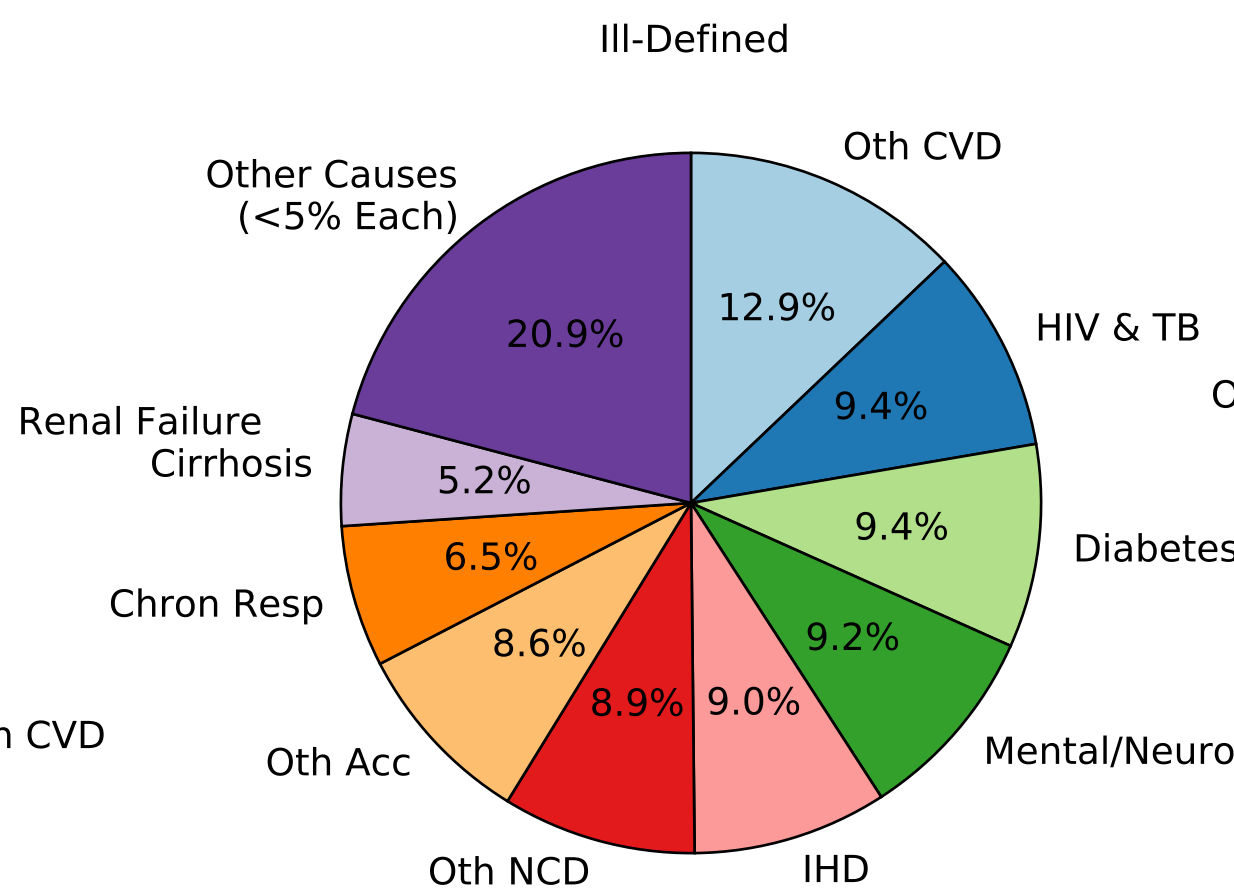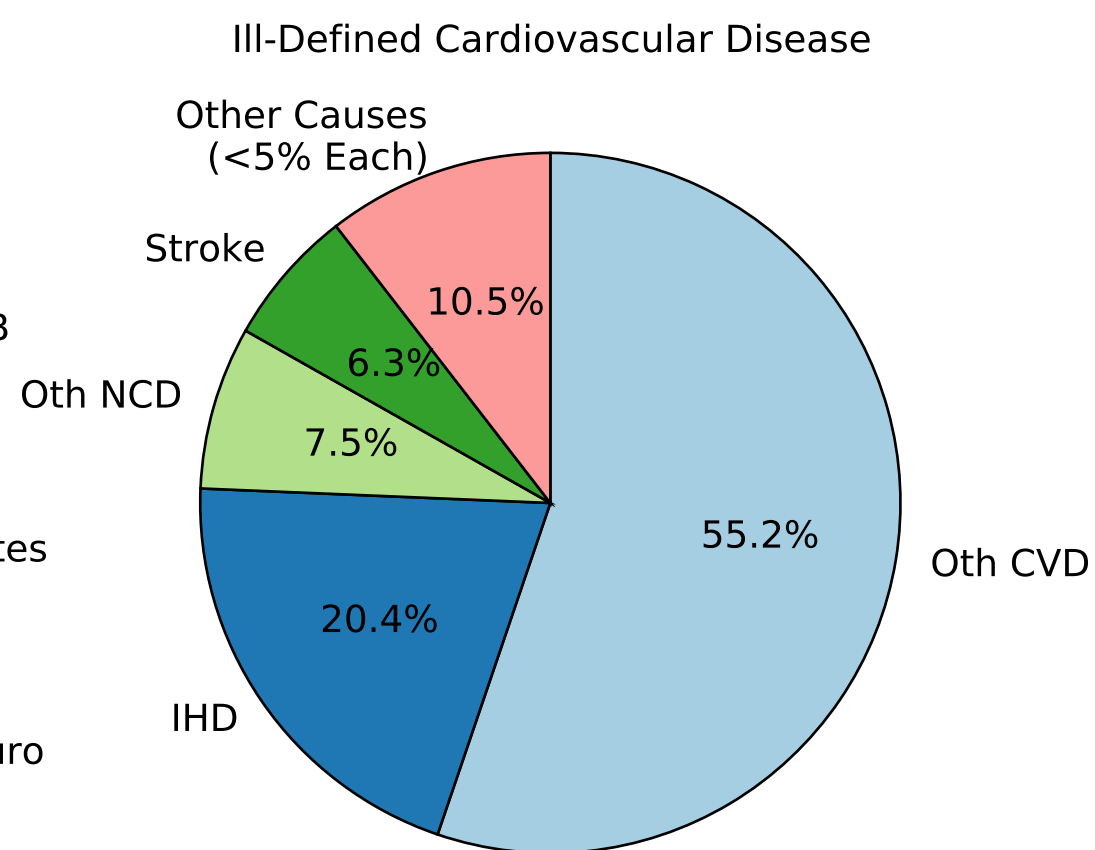

Ill-Defined Injury

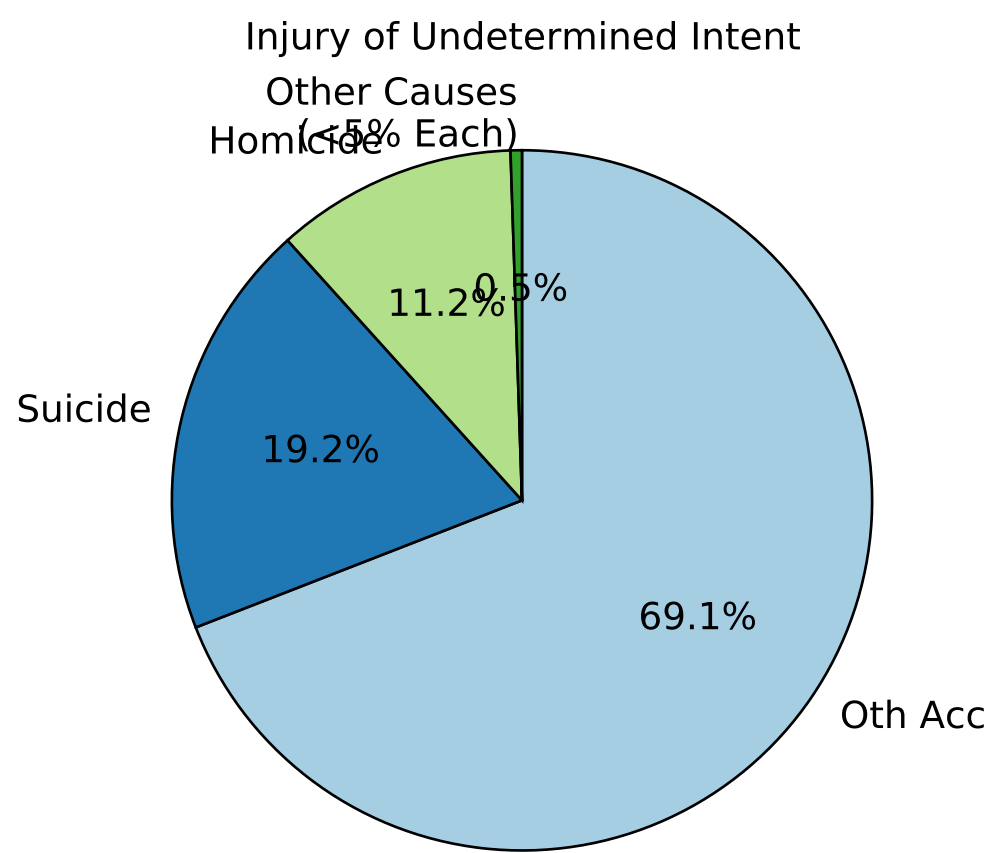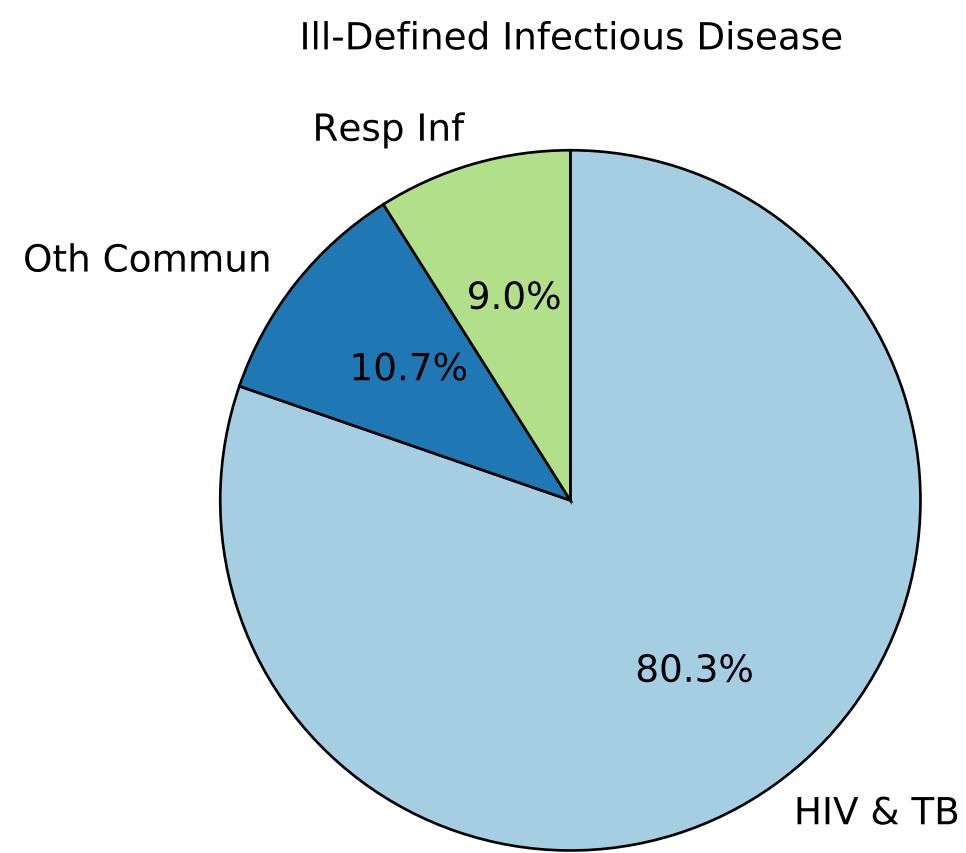

ICD 10  
Male, Age 55

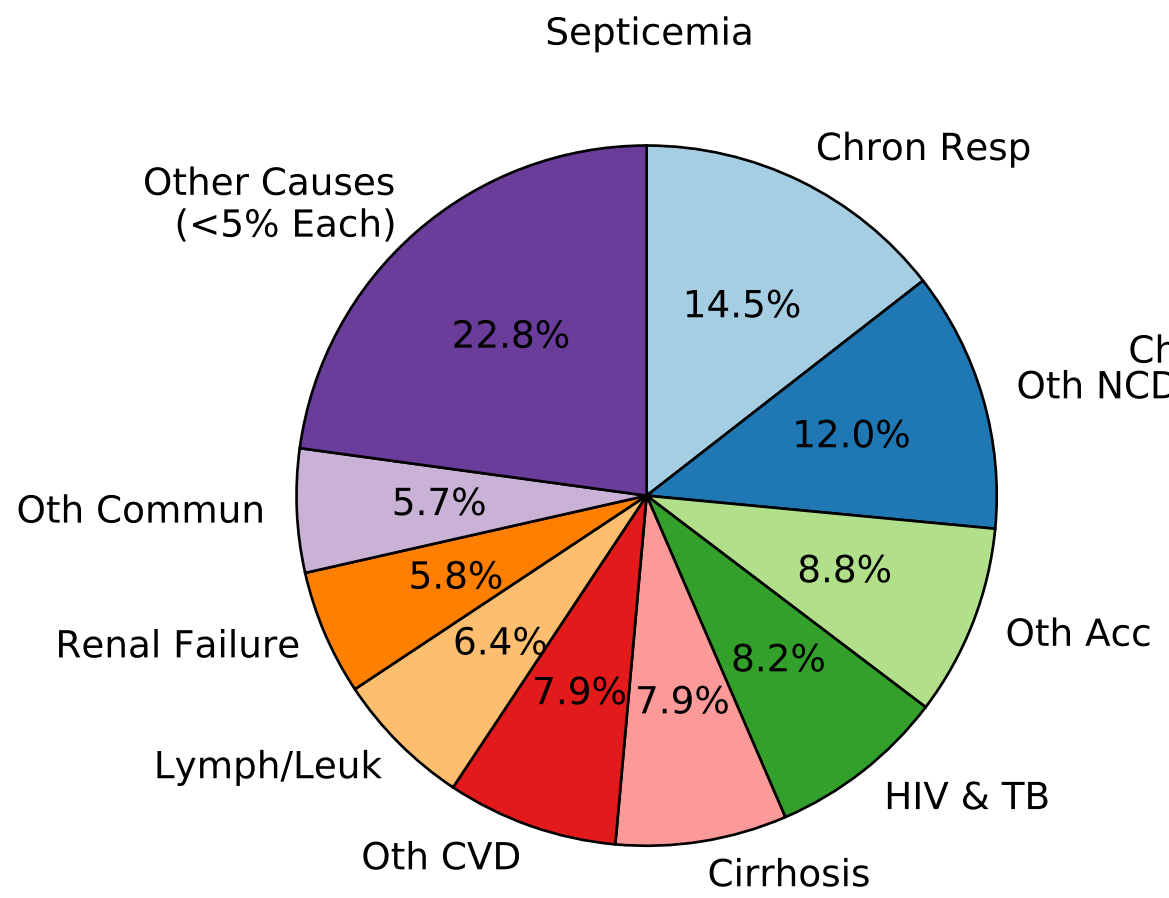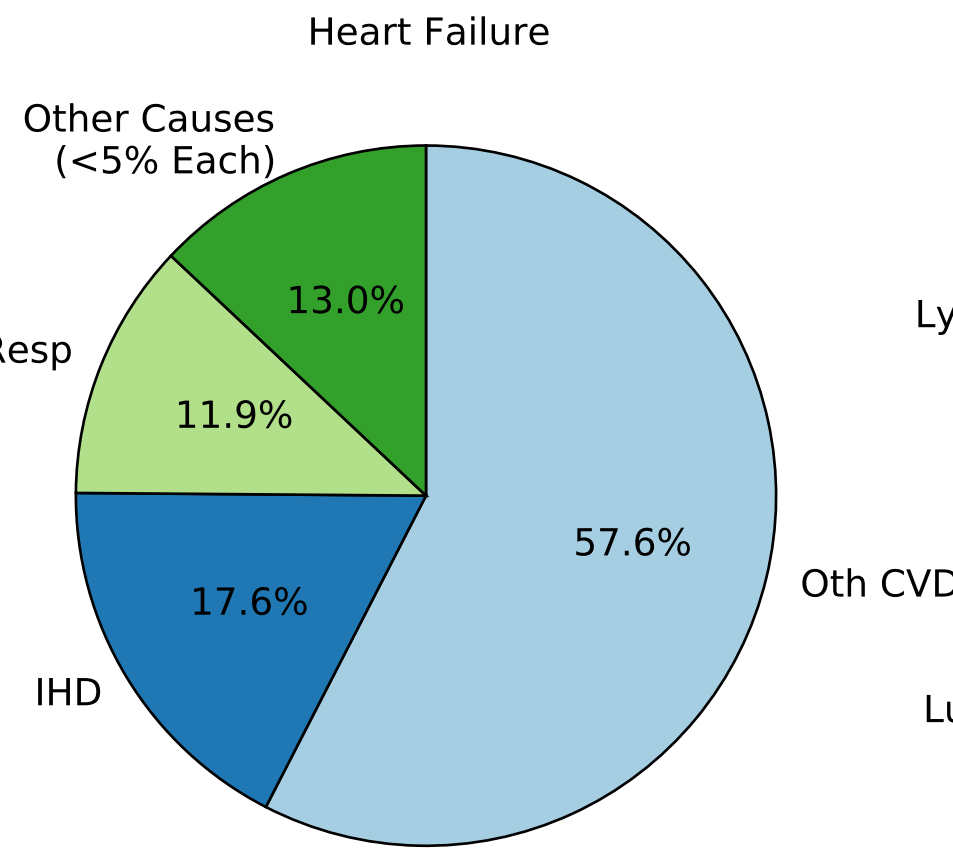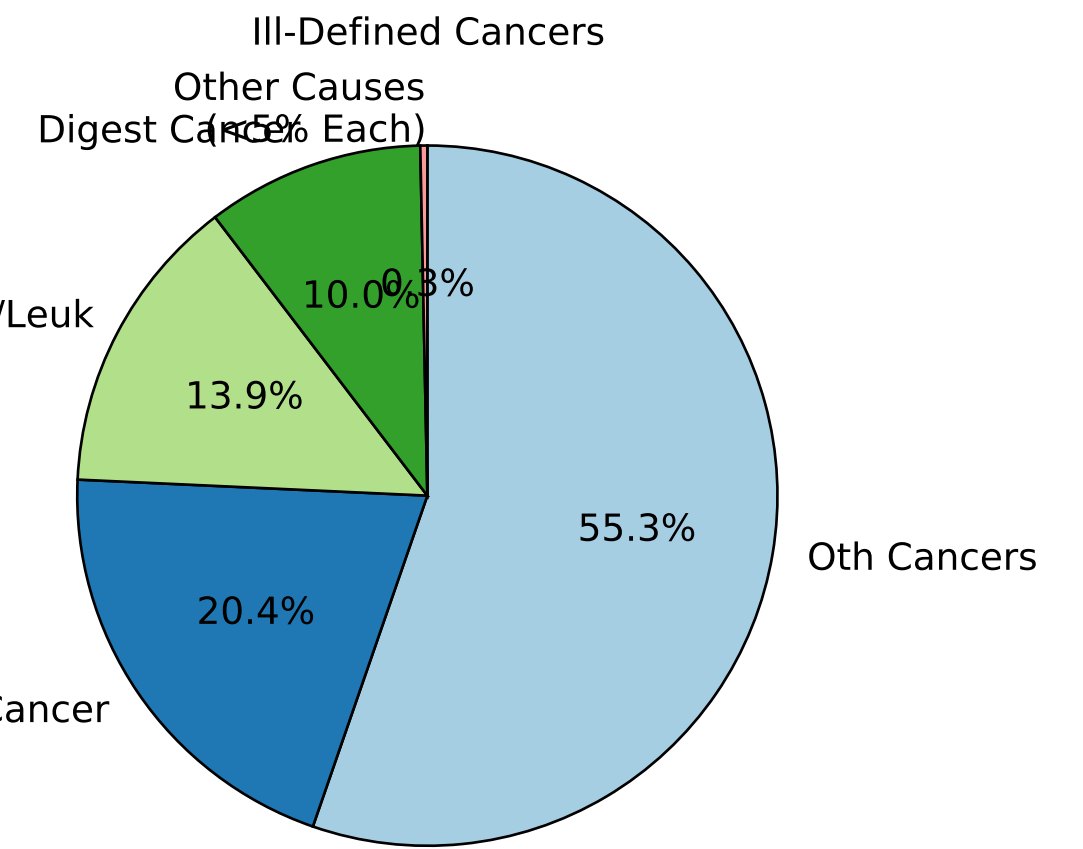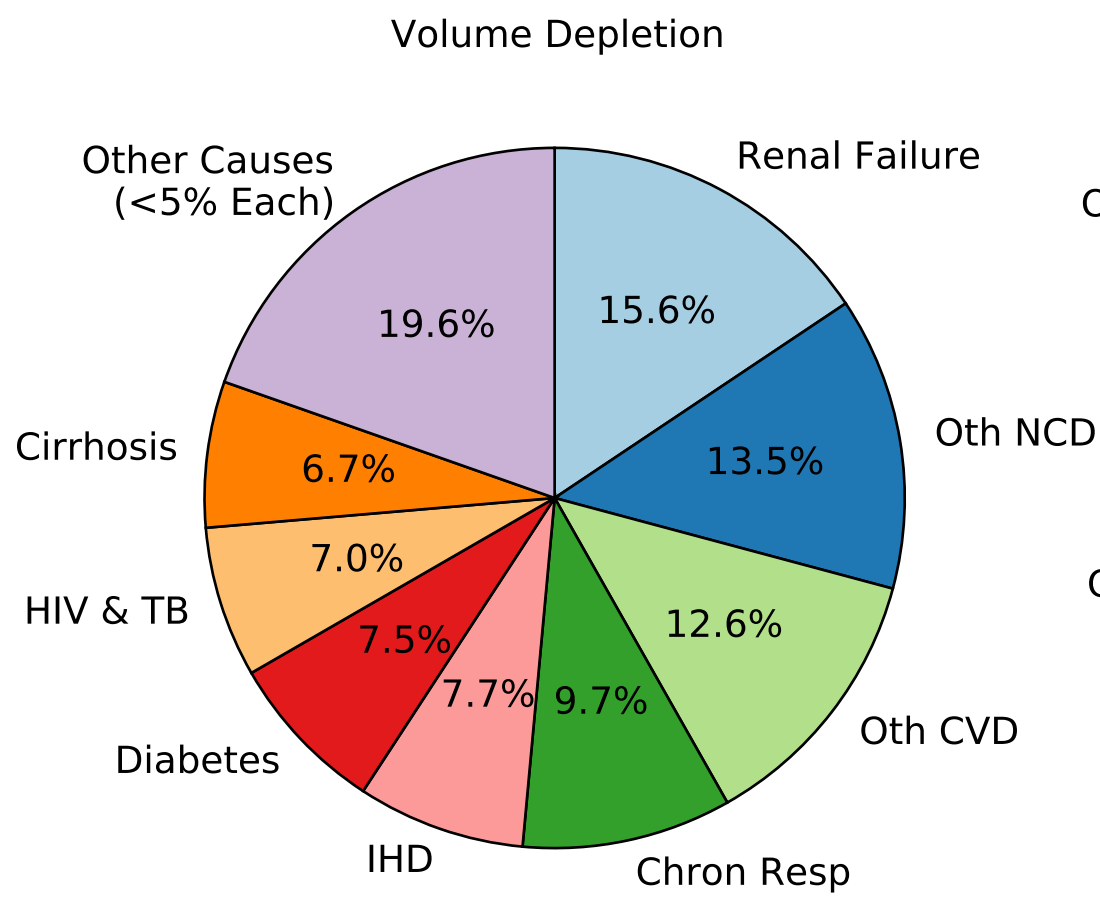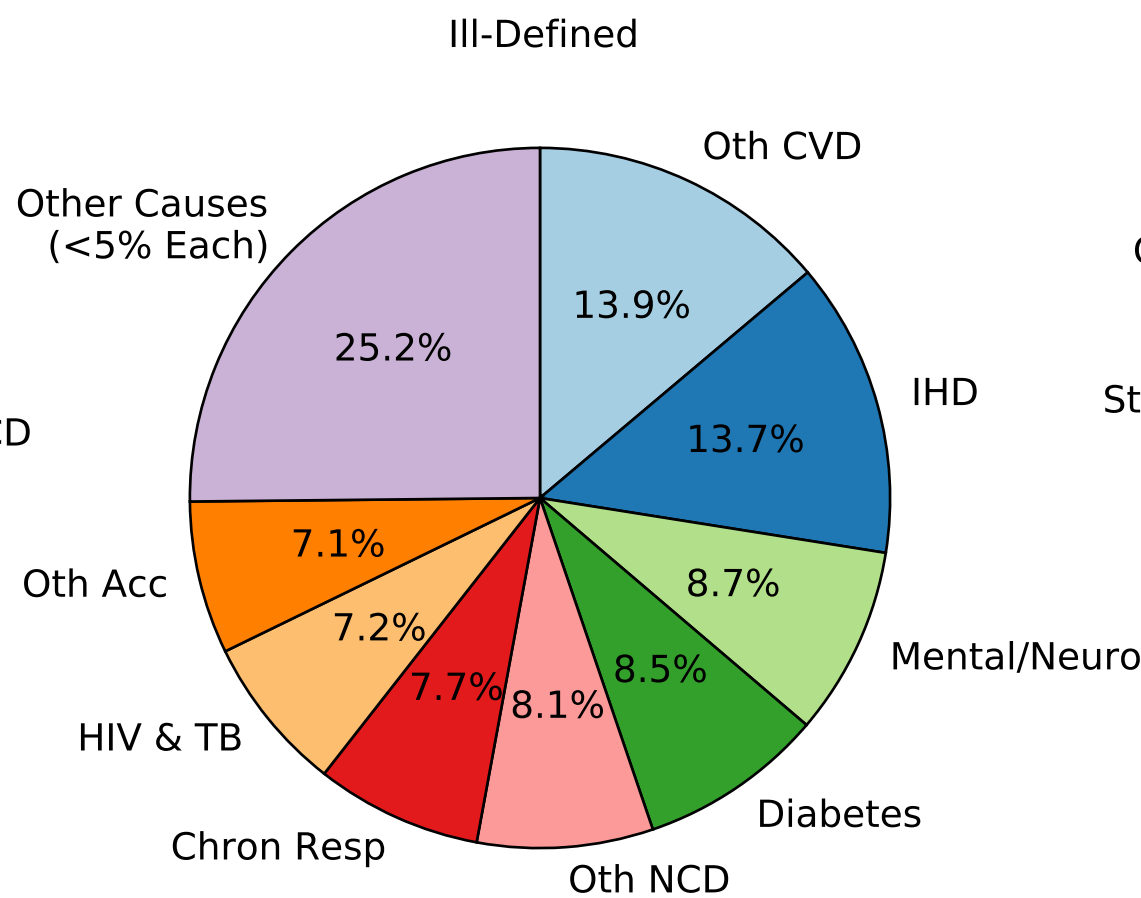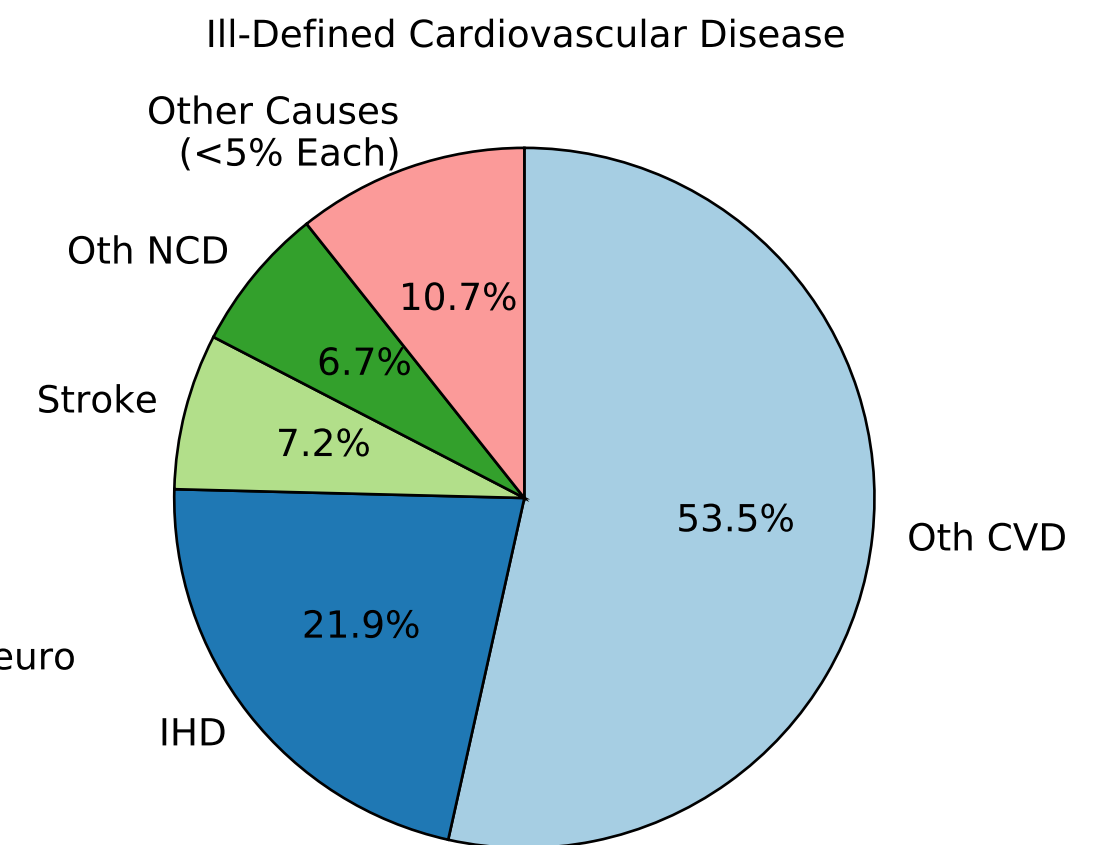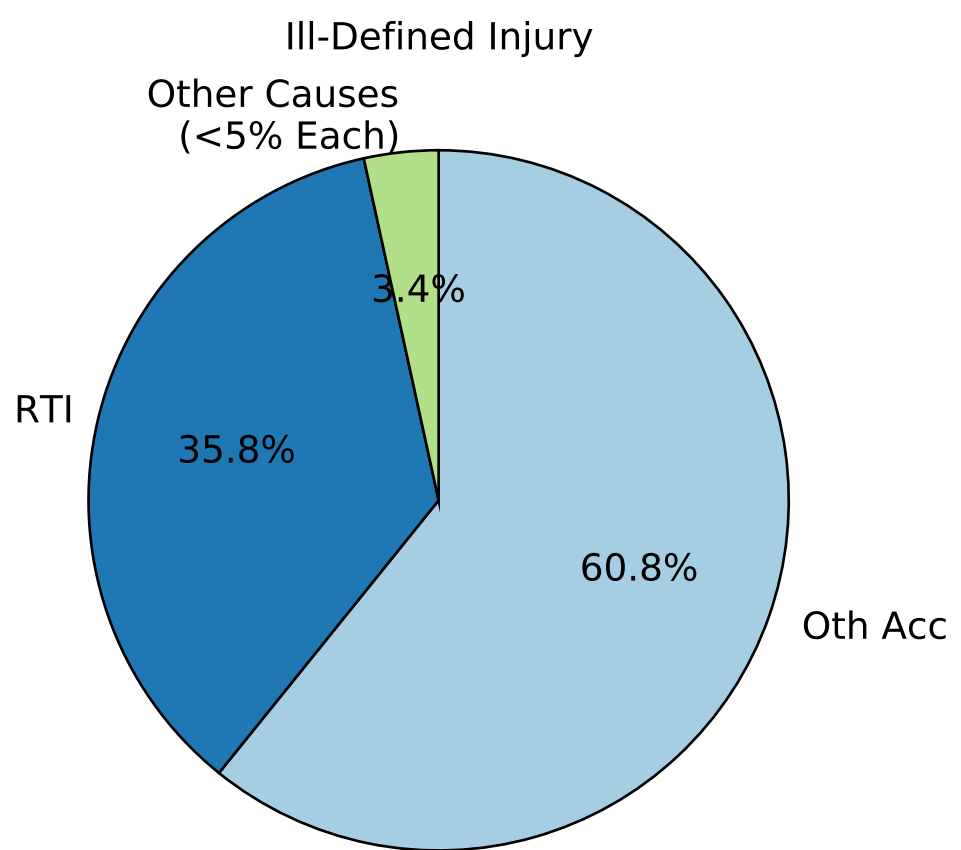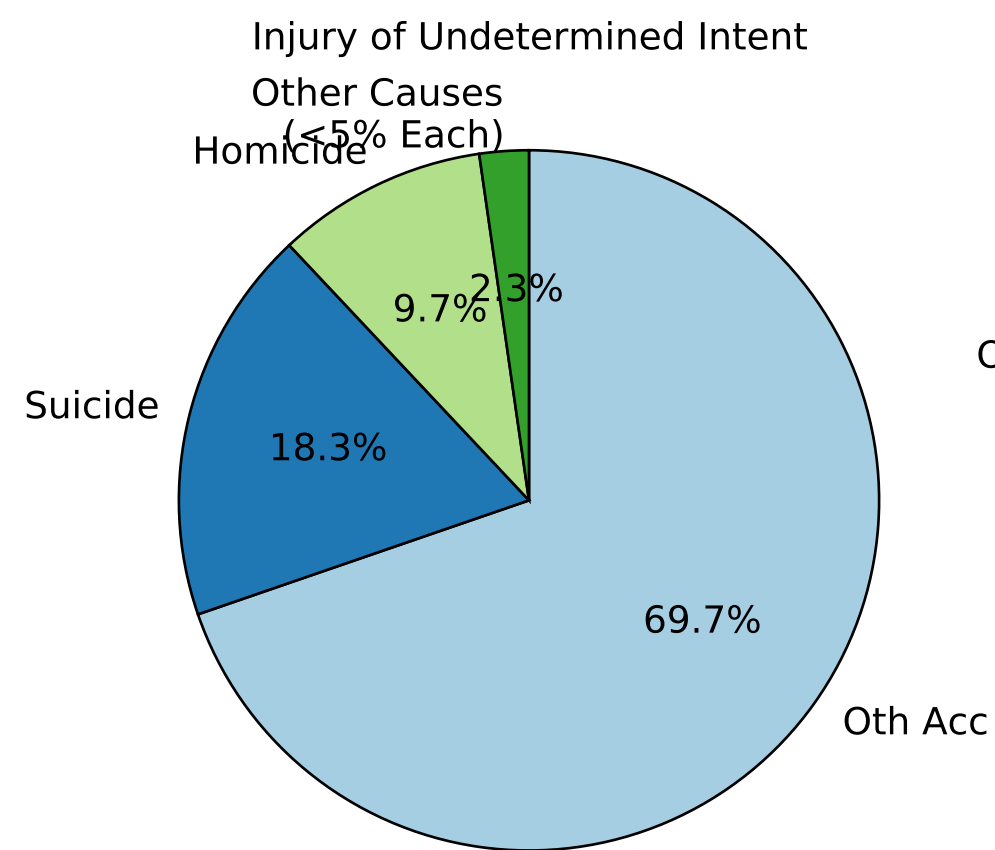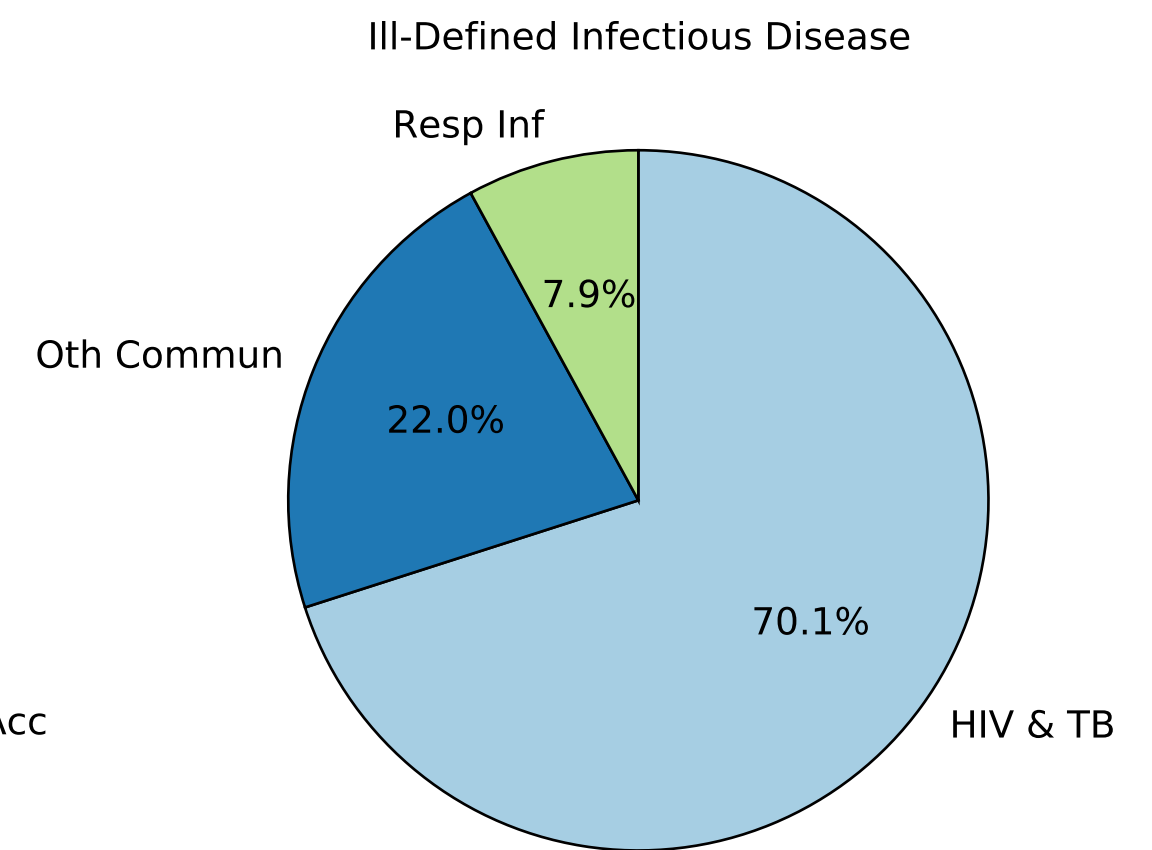

ICD 10  
Male, Age 60

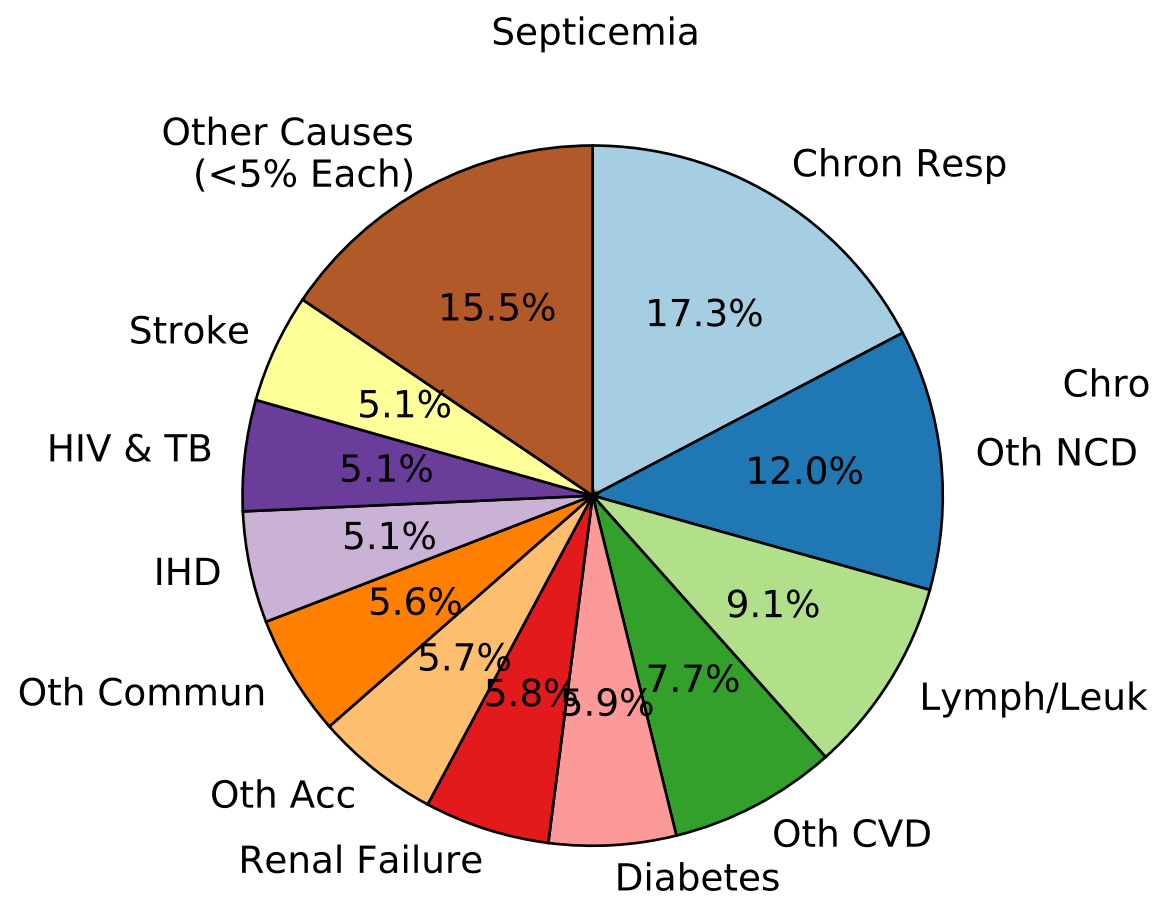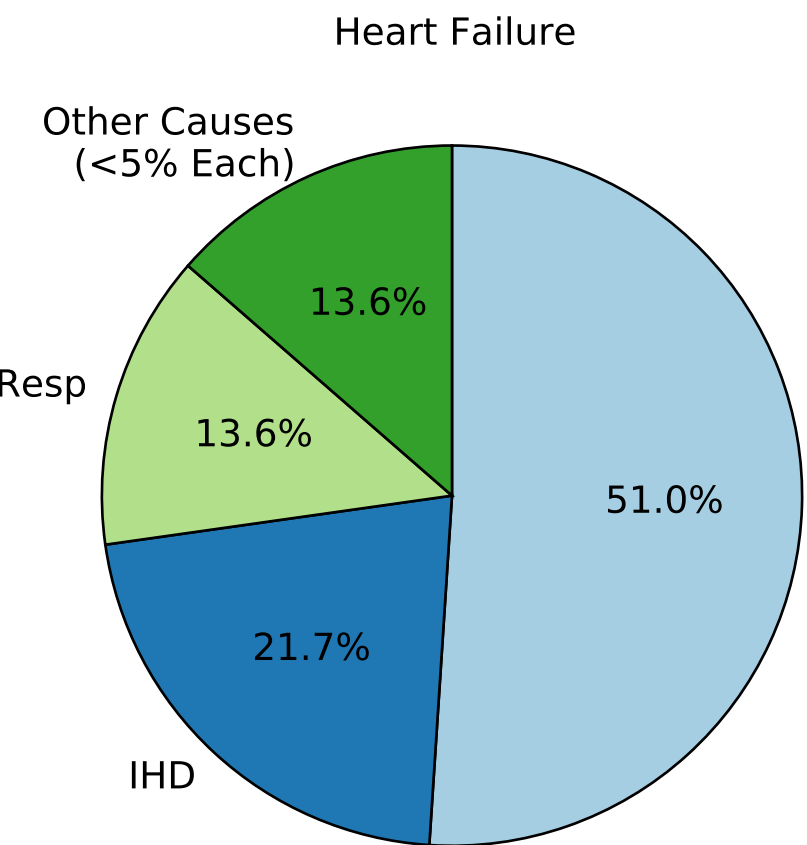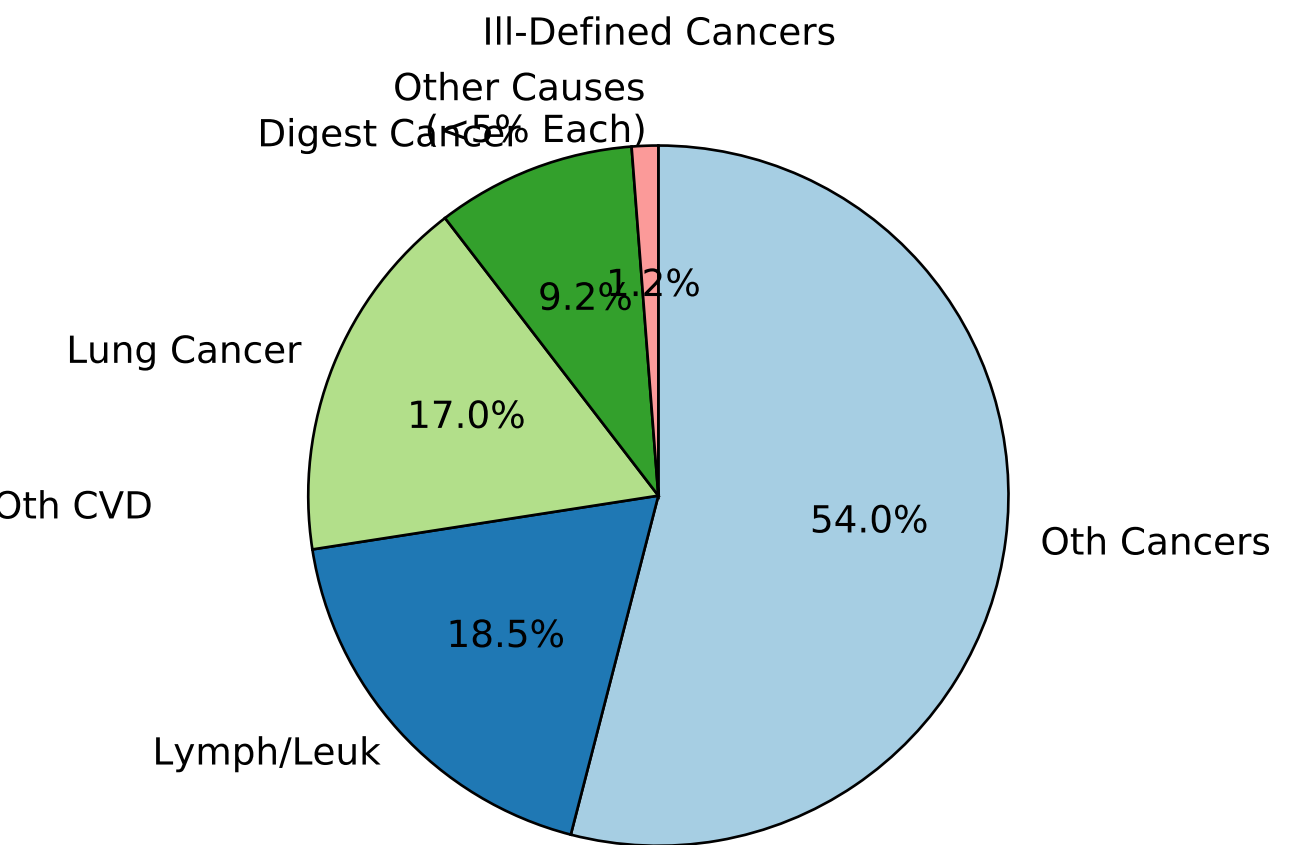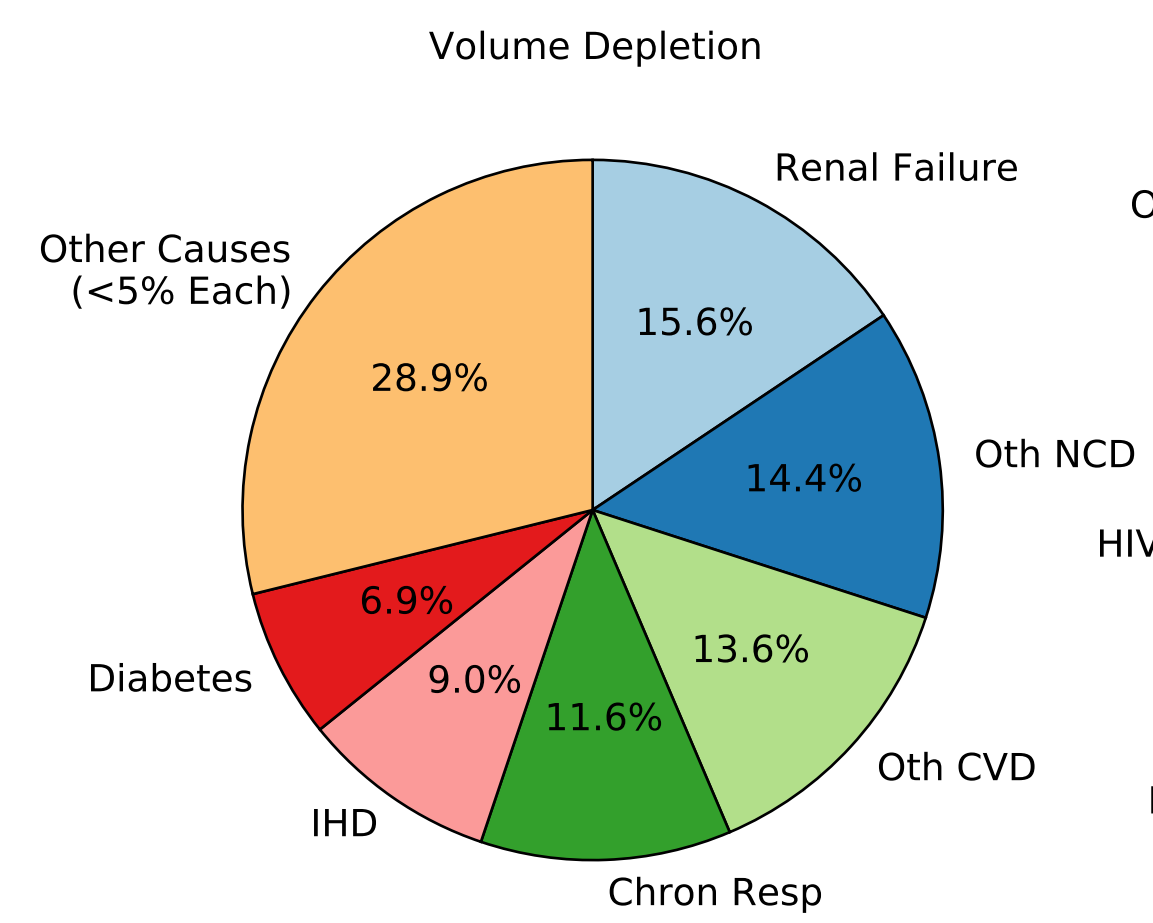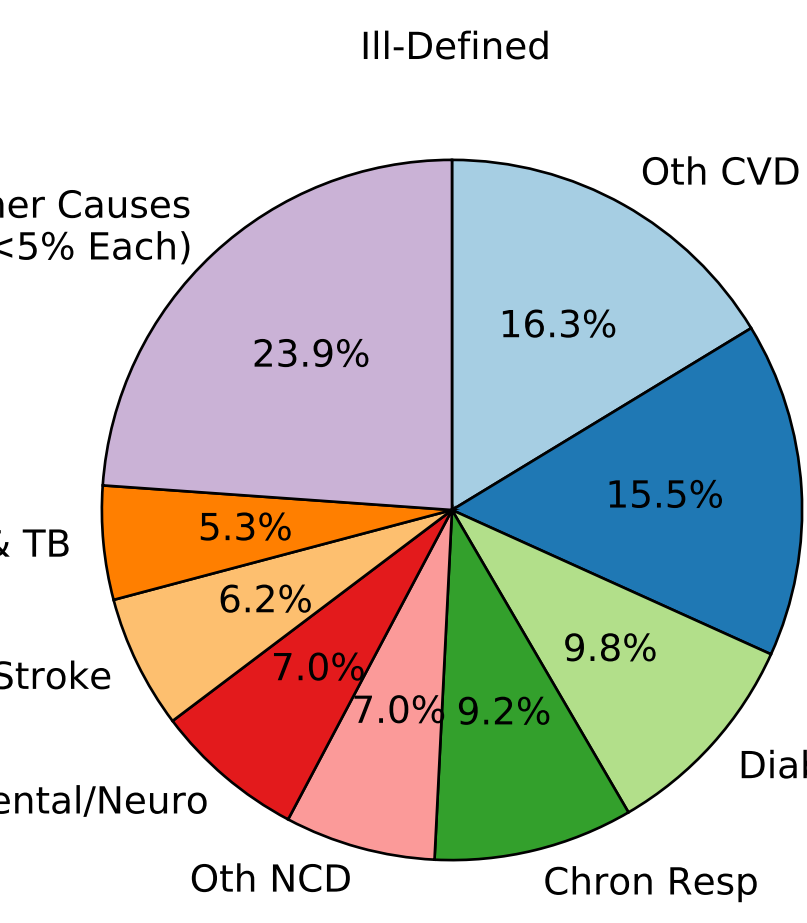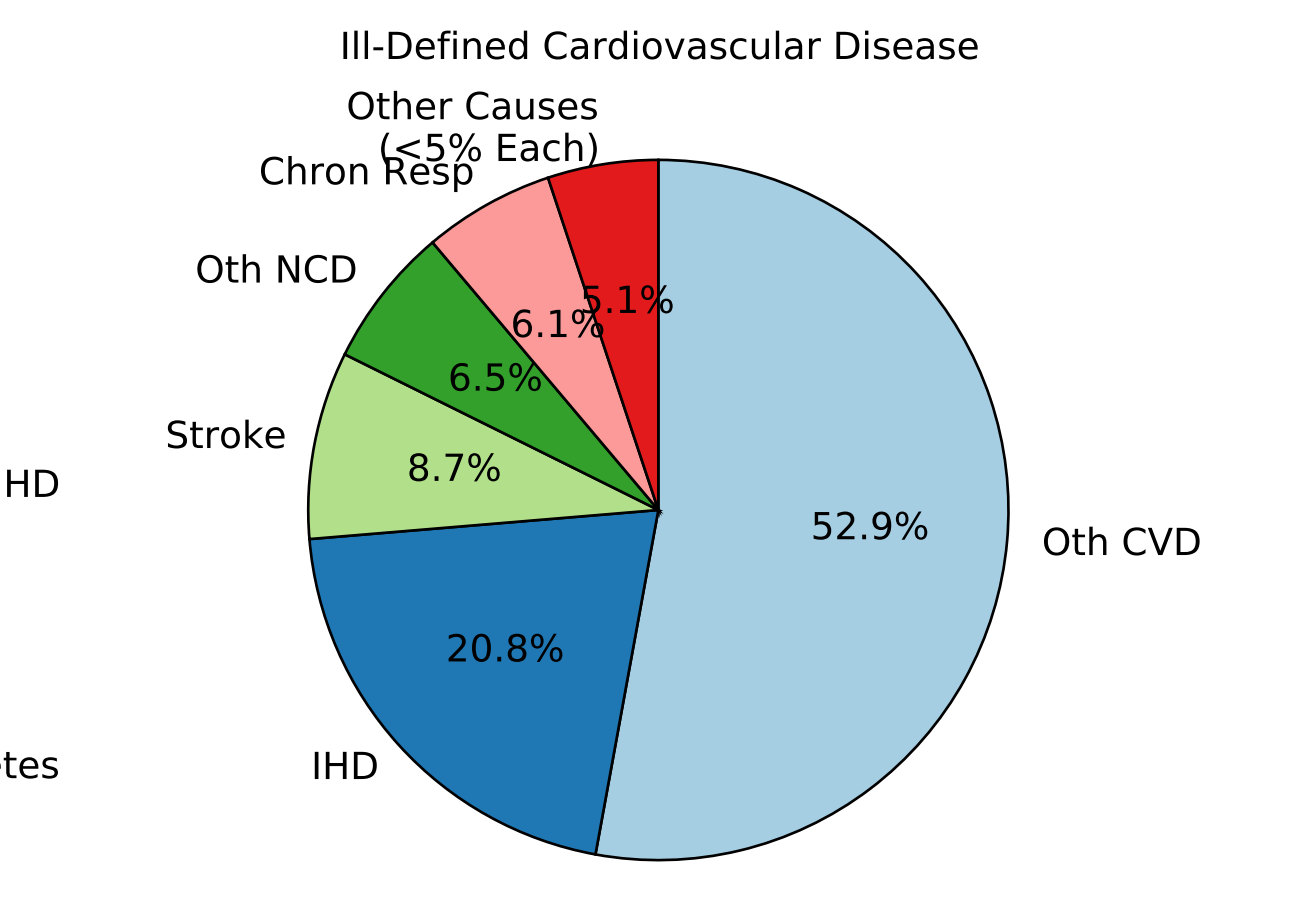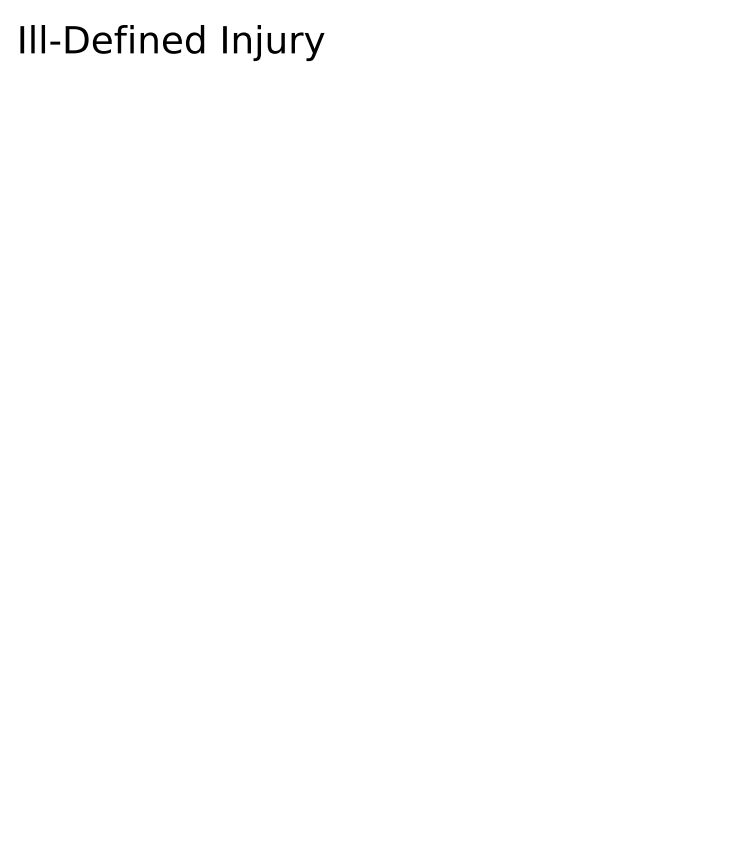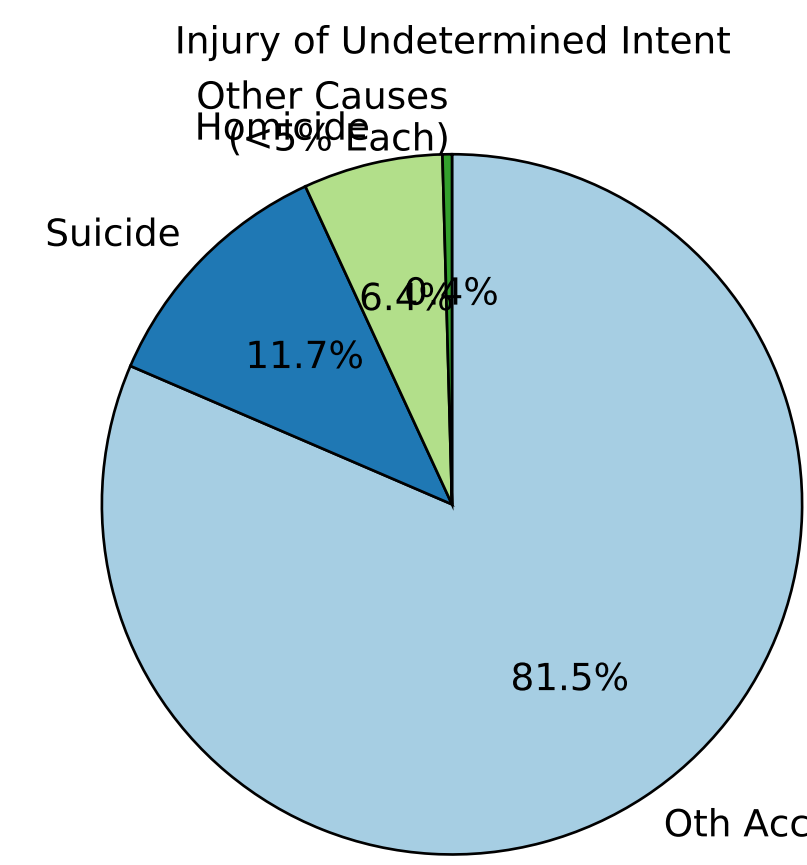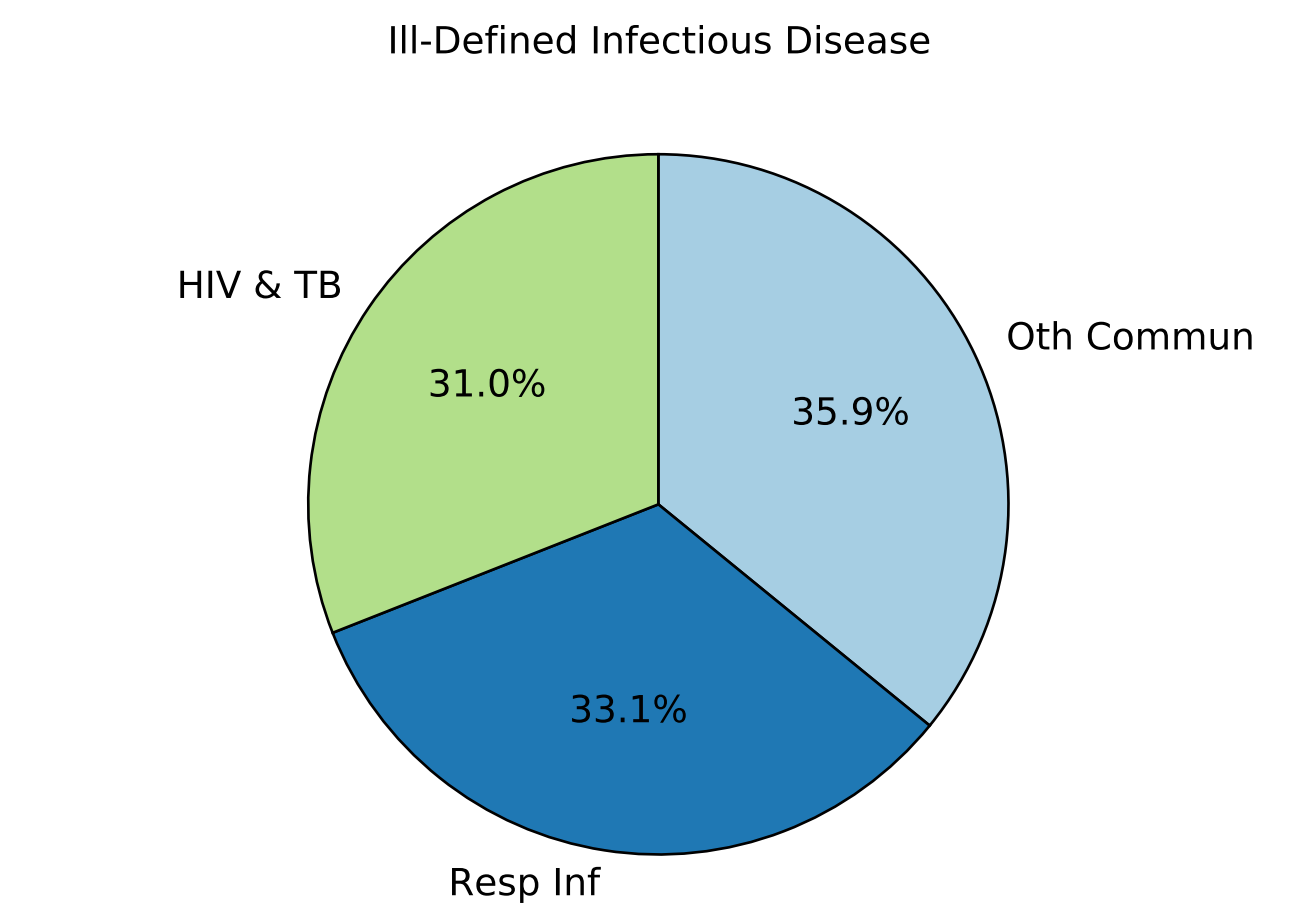

ICD 10  
Male, Age 65

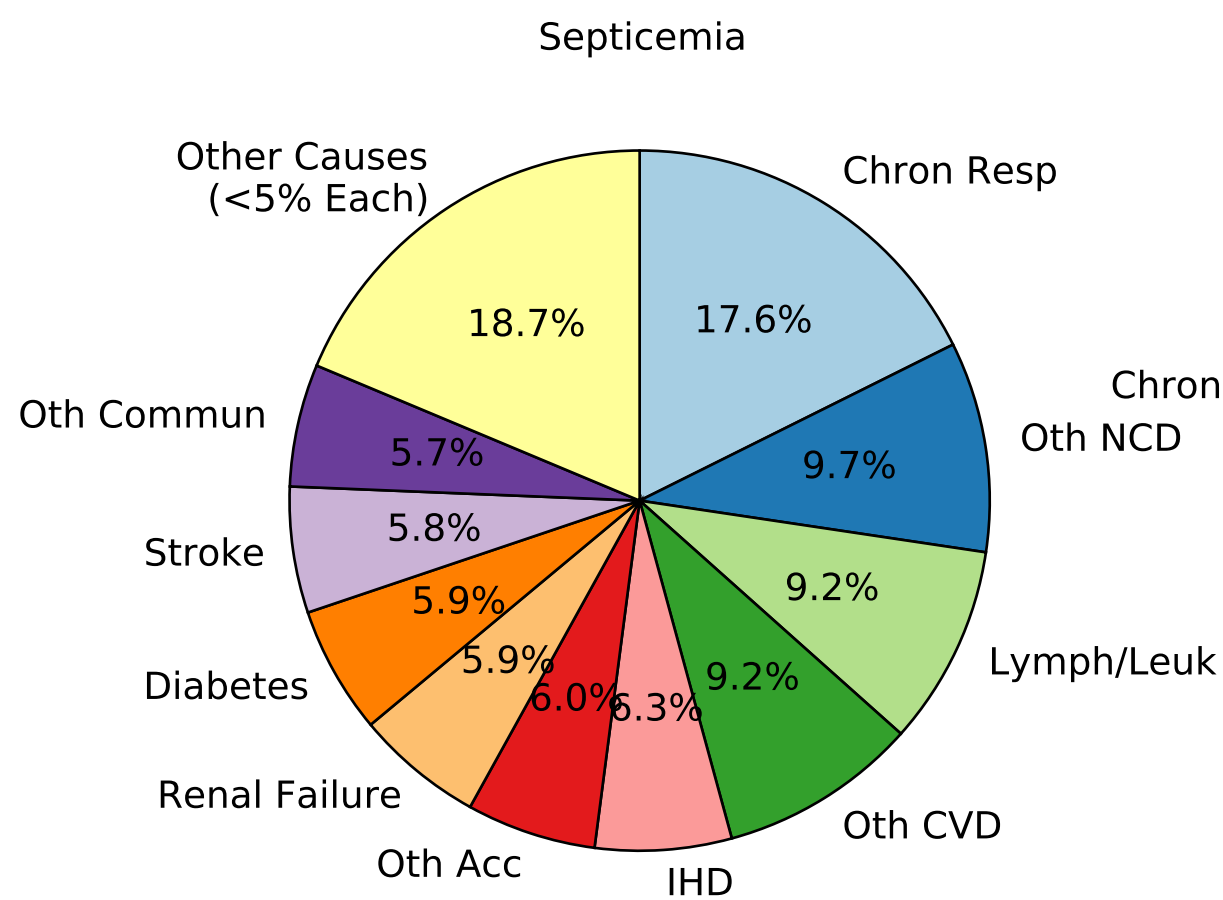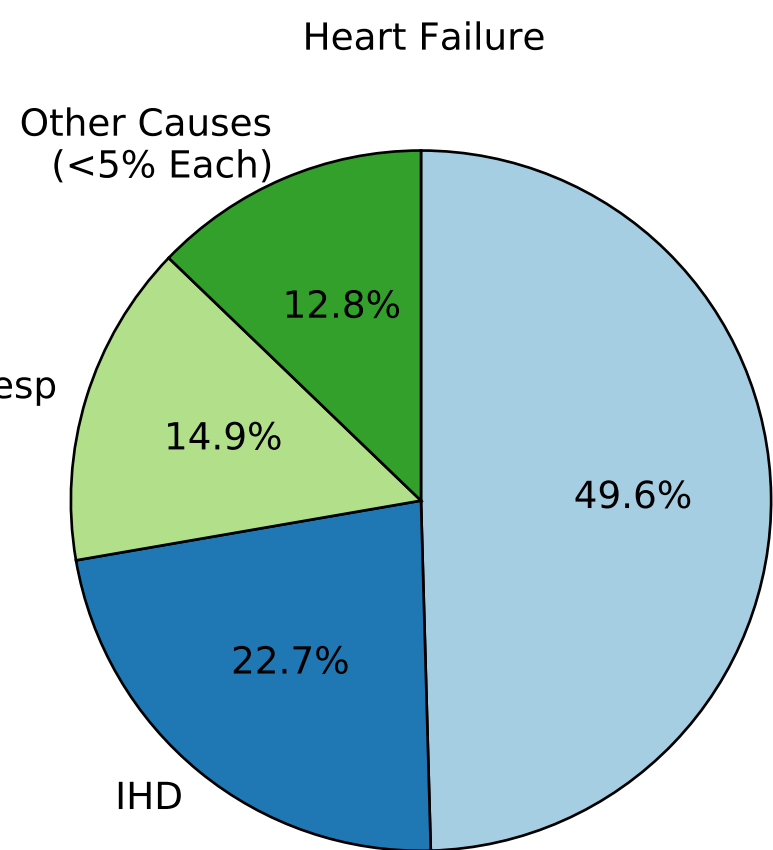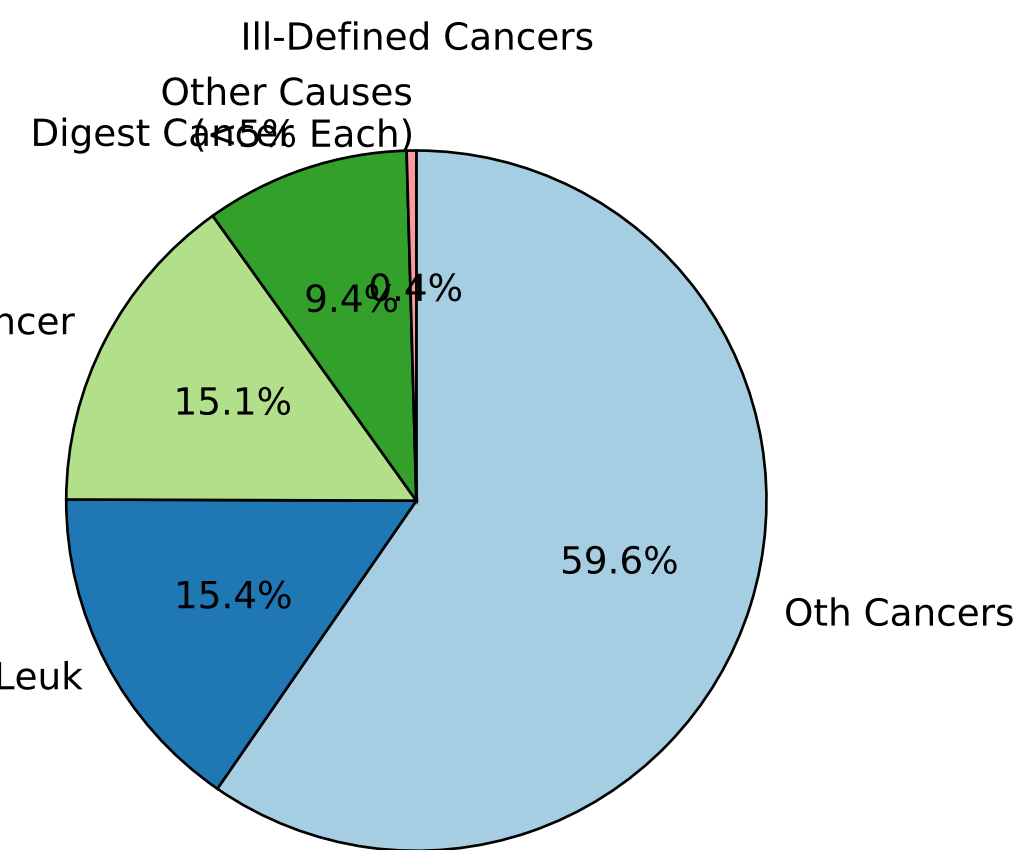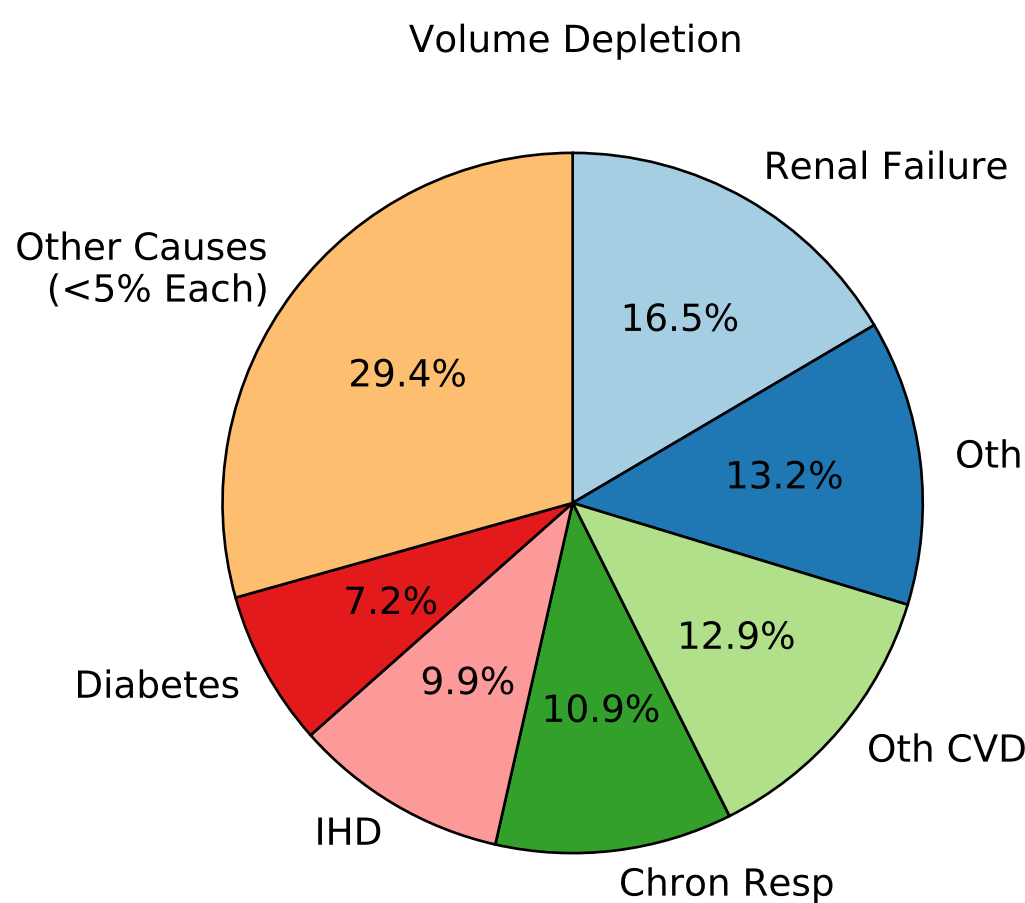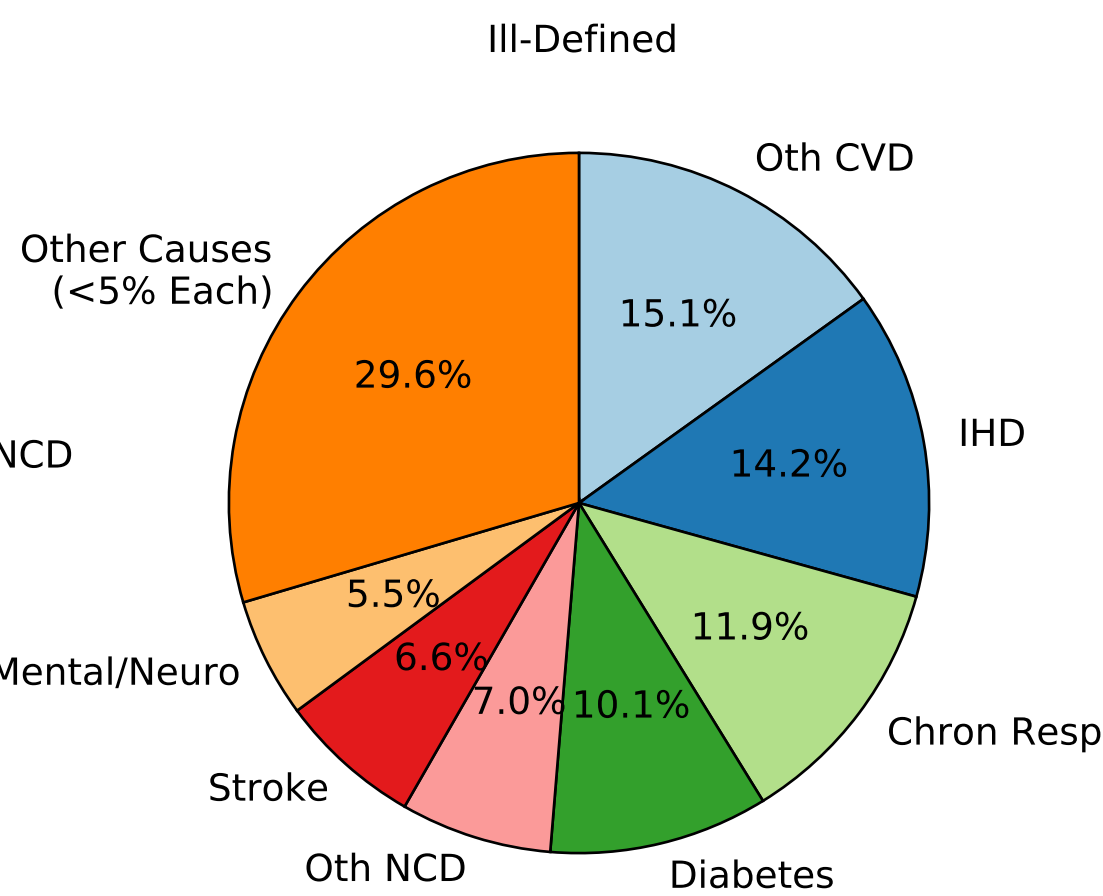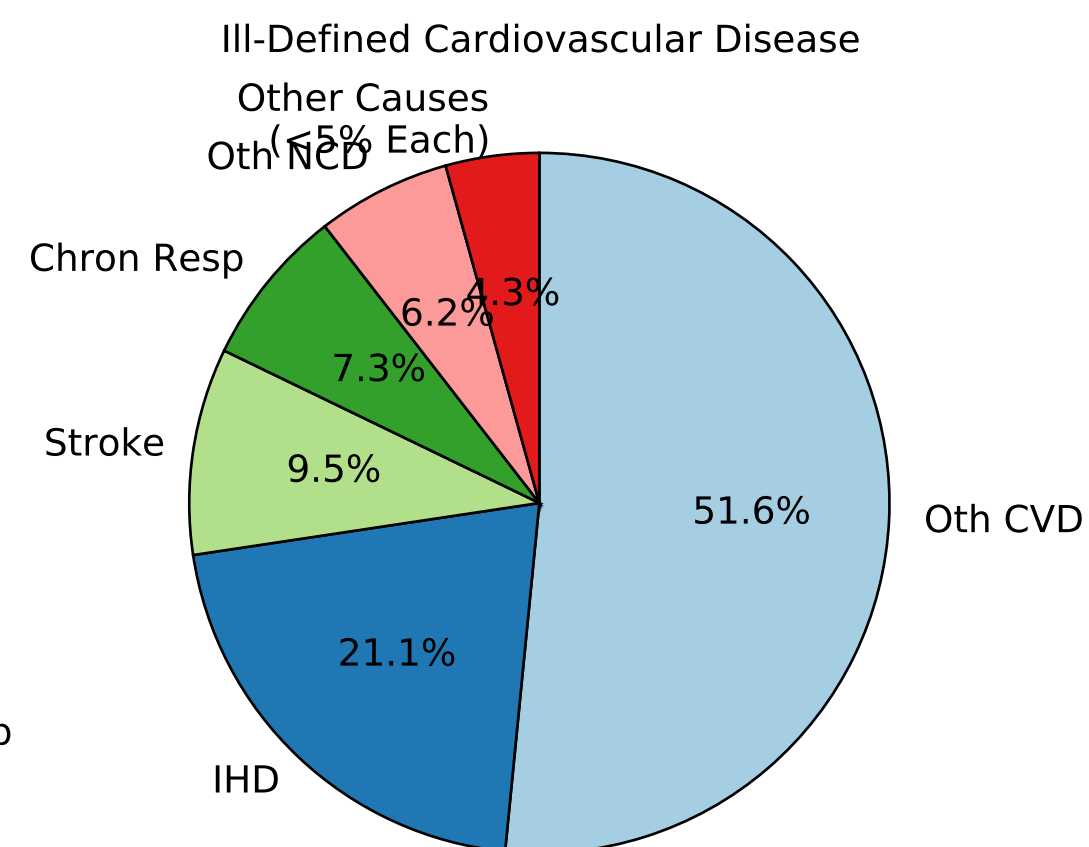

III-Defined Injury

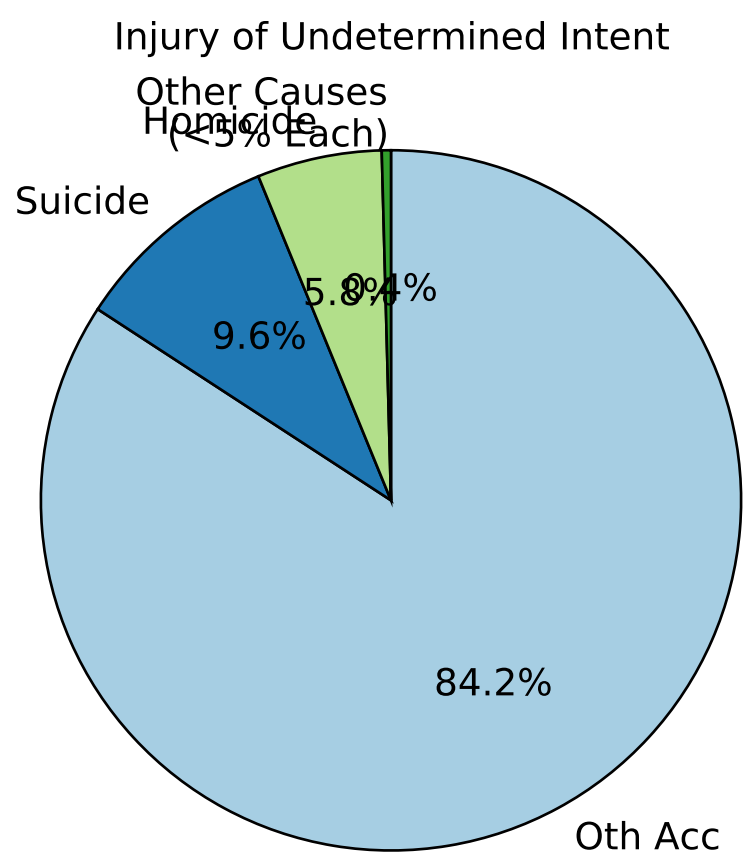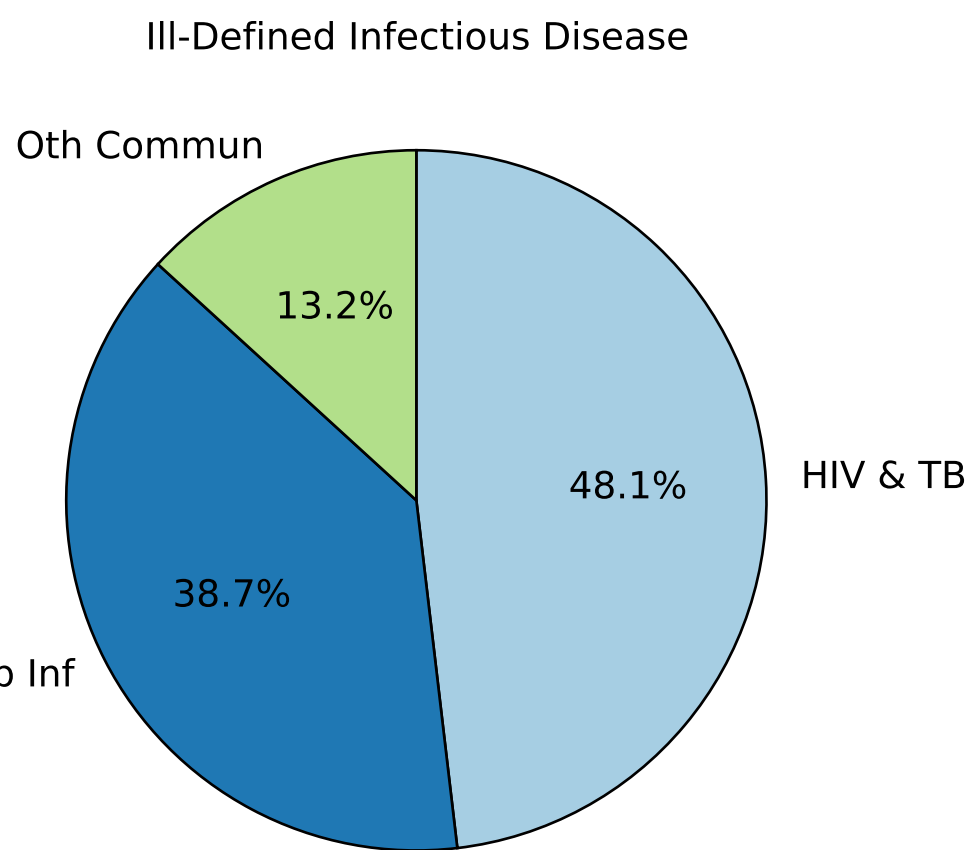

ICD 10  
Male, Age 70

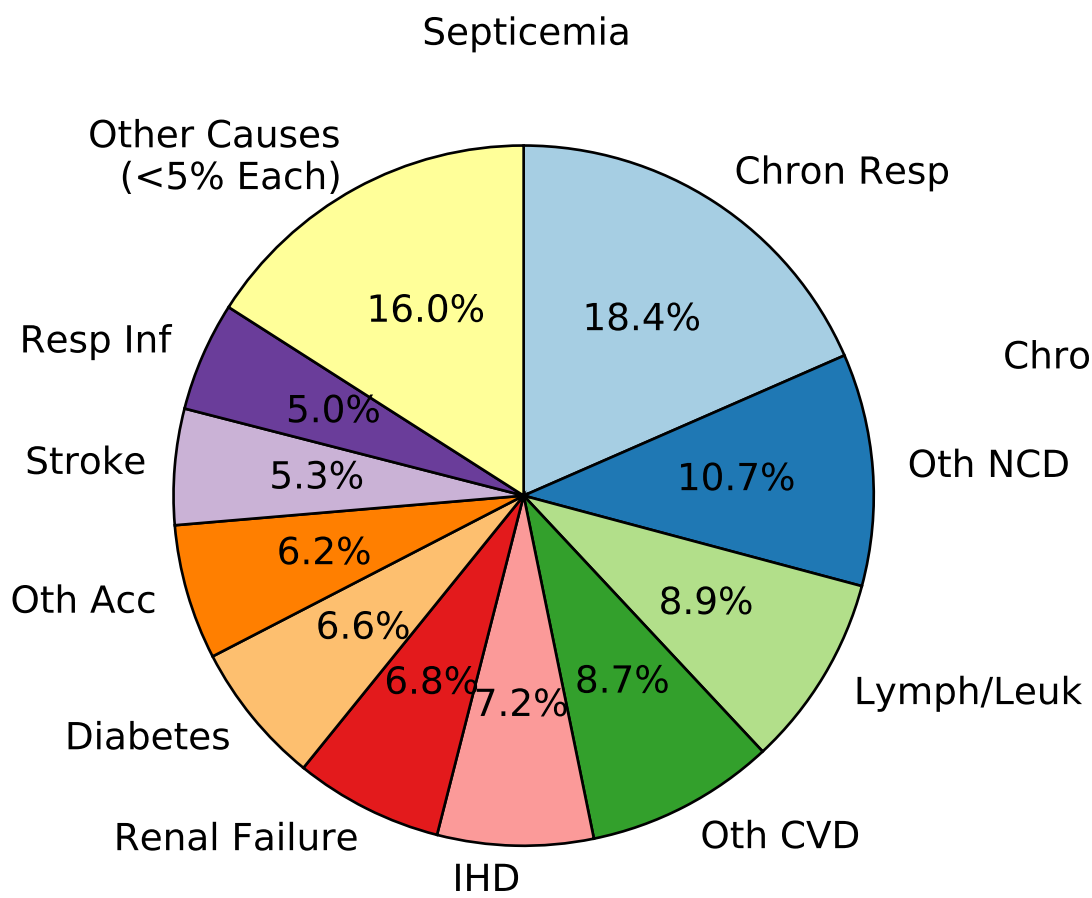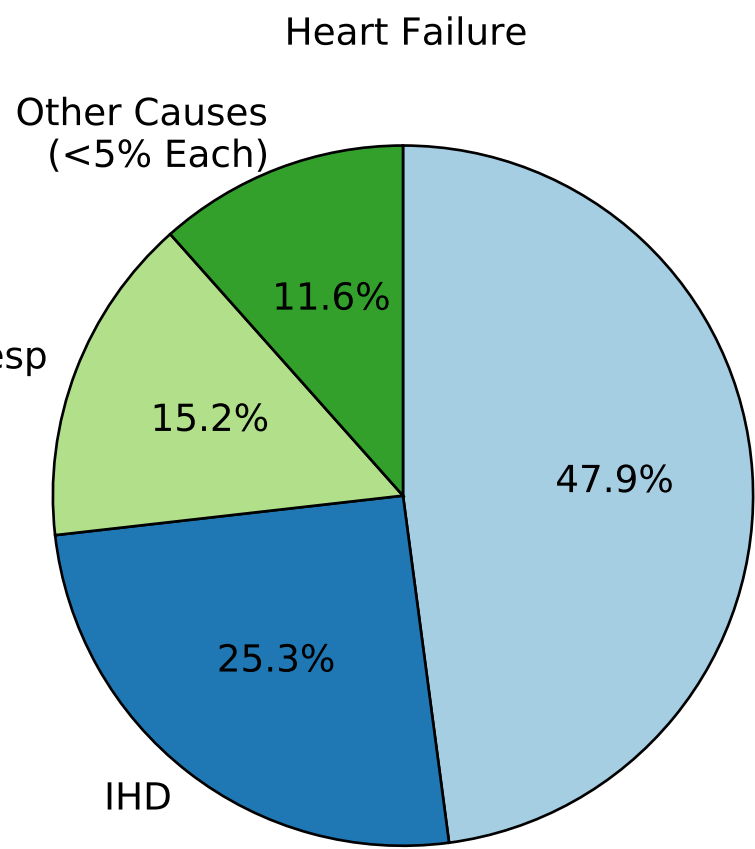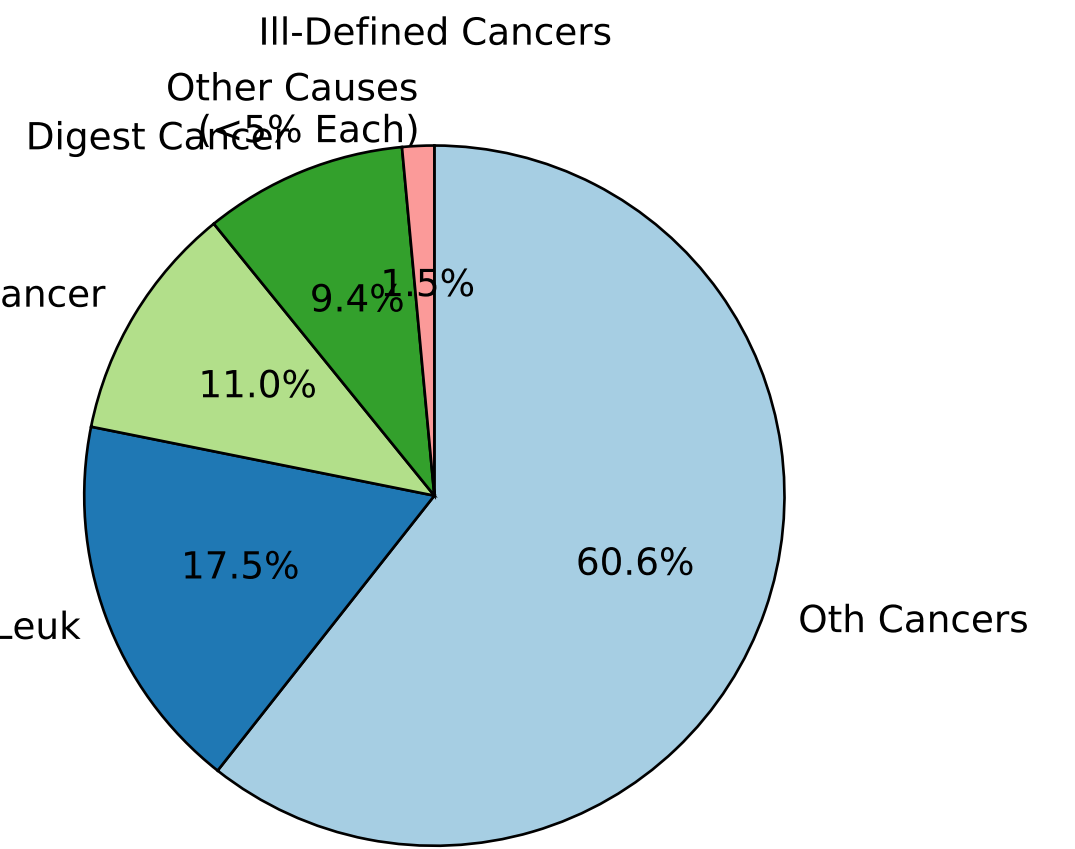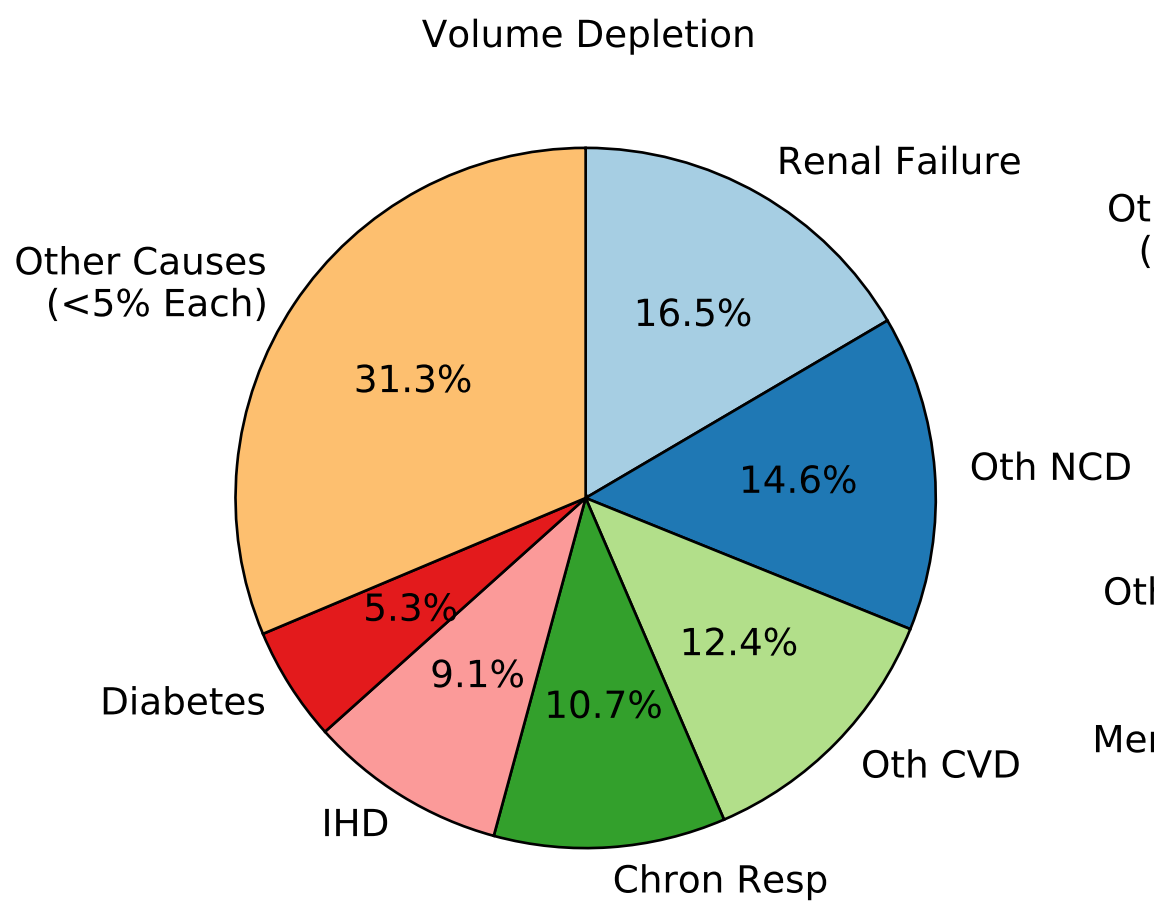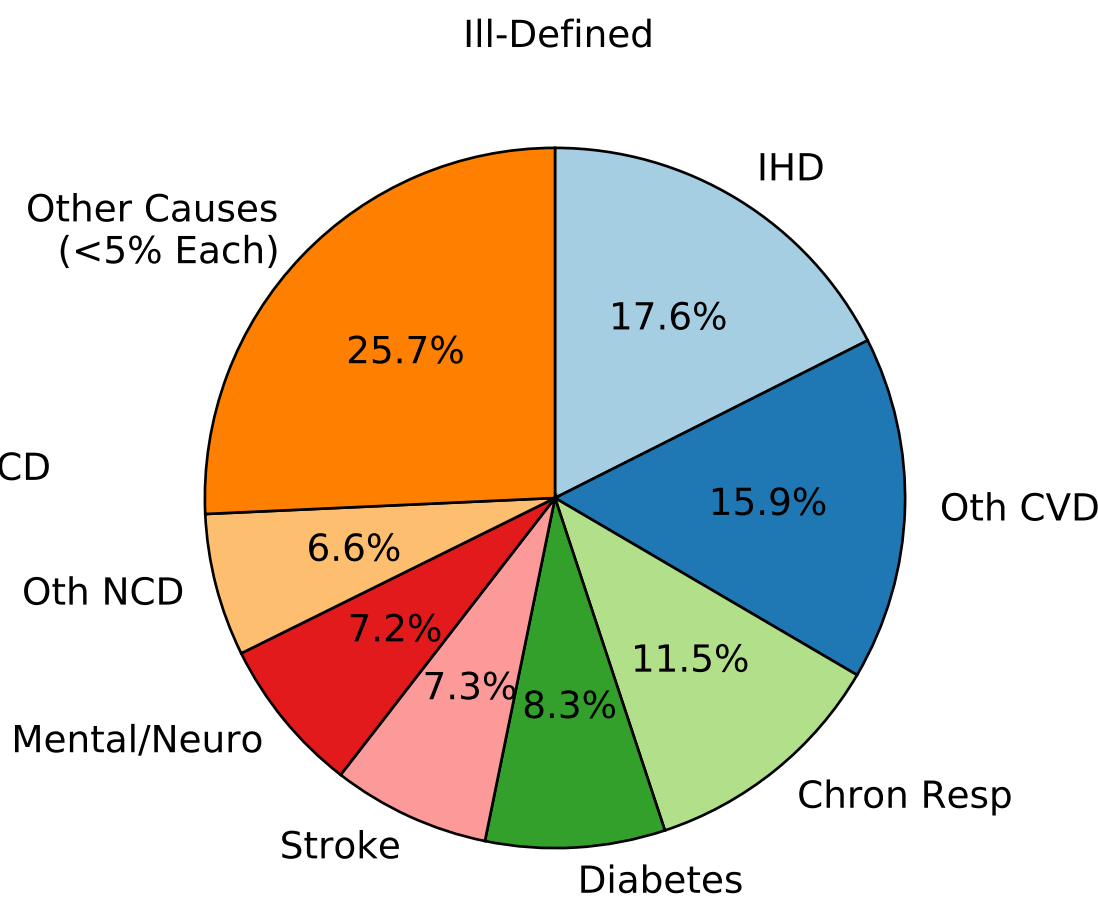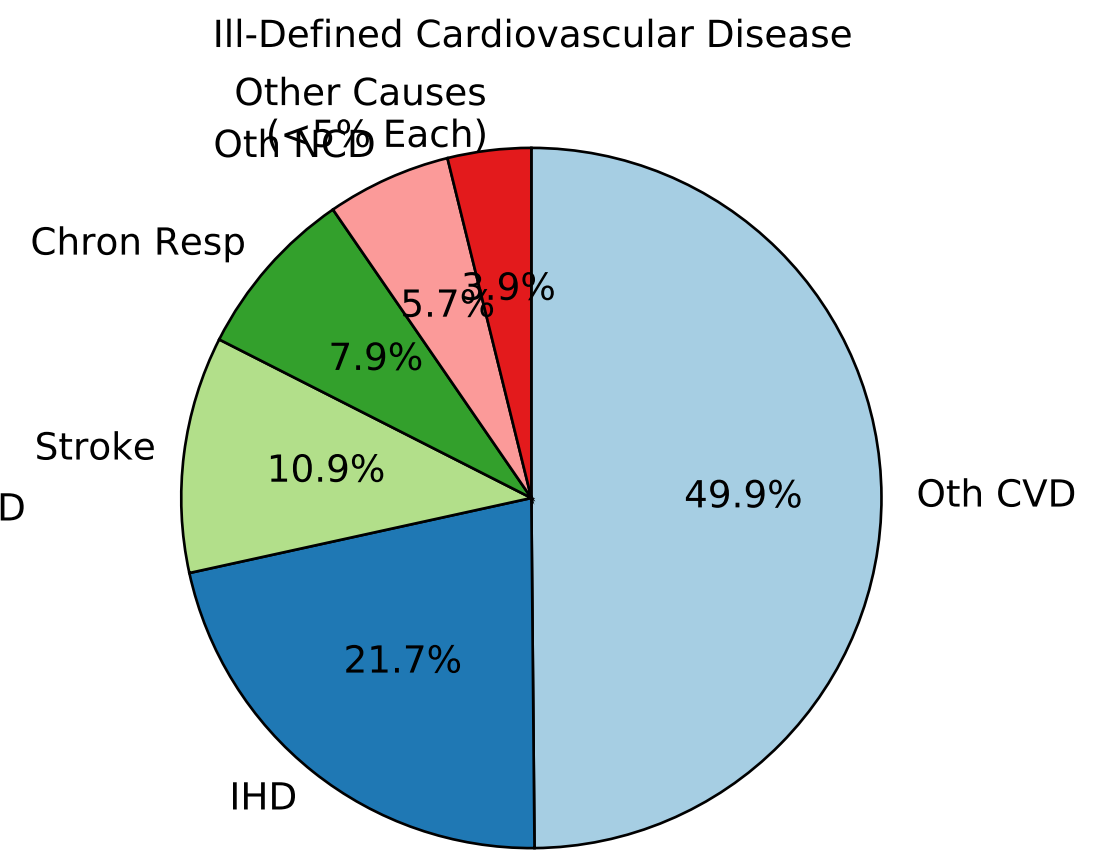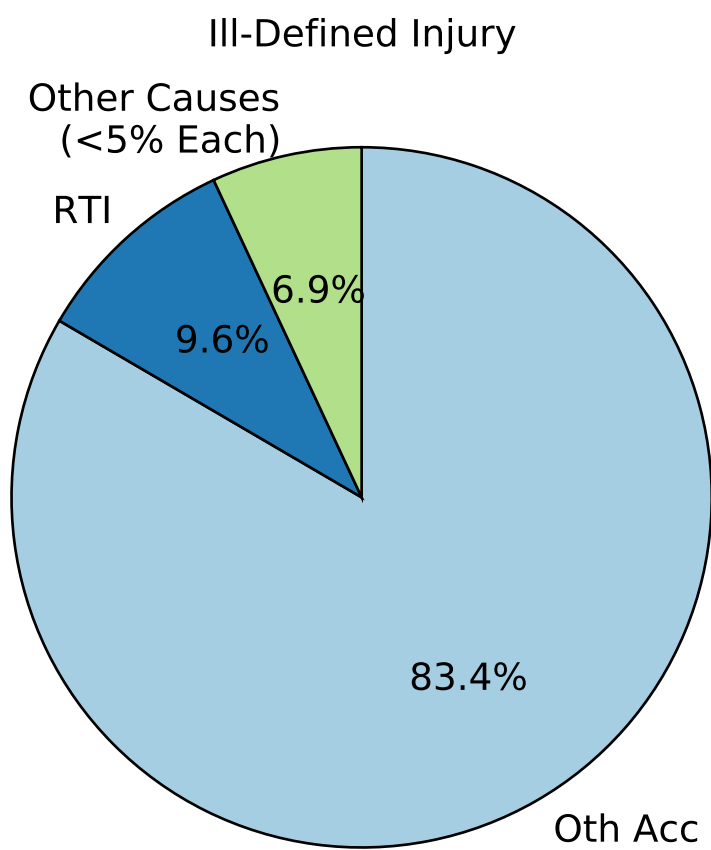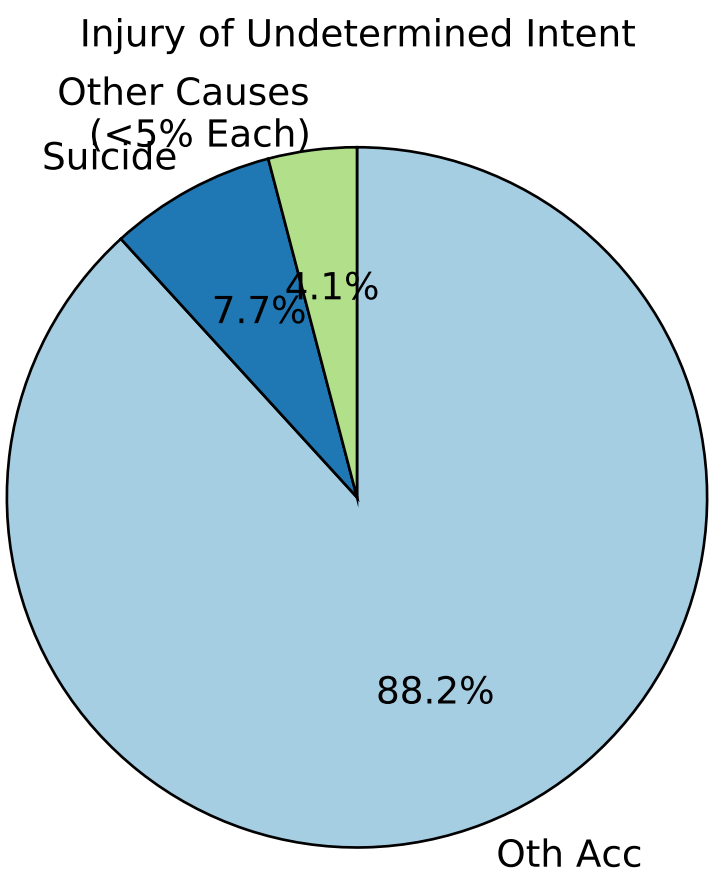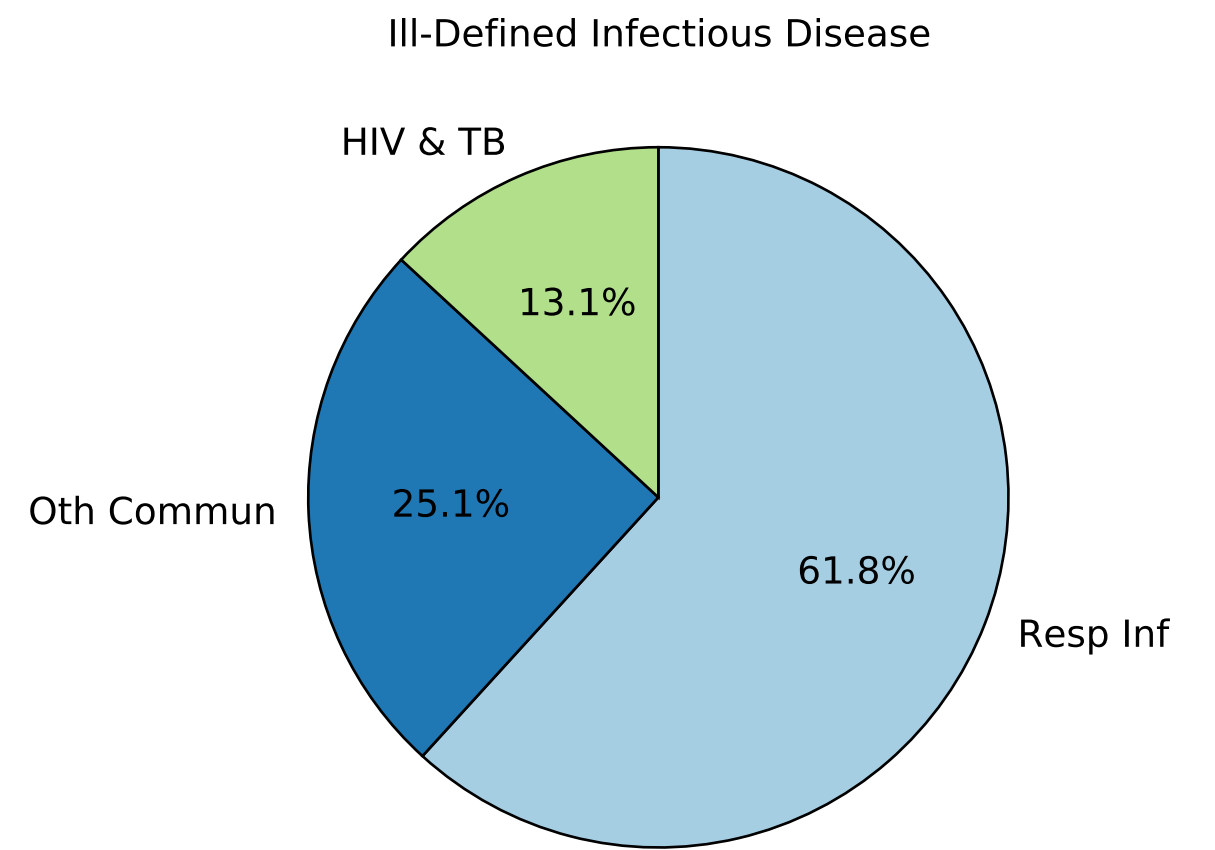

ICD 10  
Male, Age 75

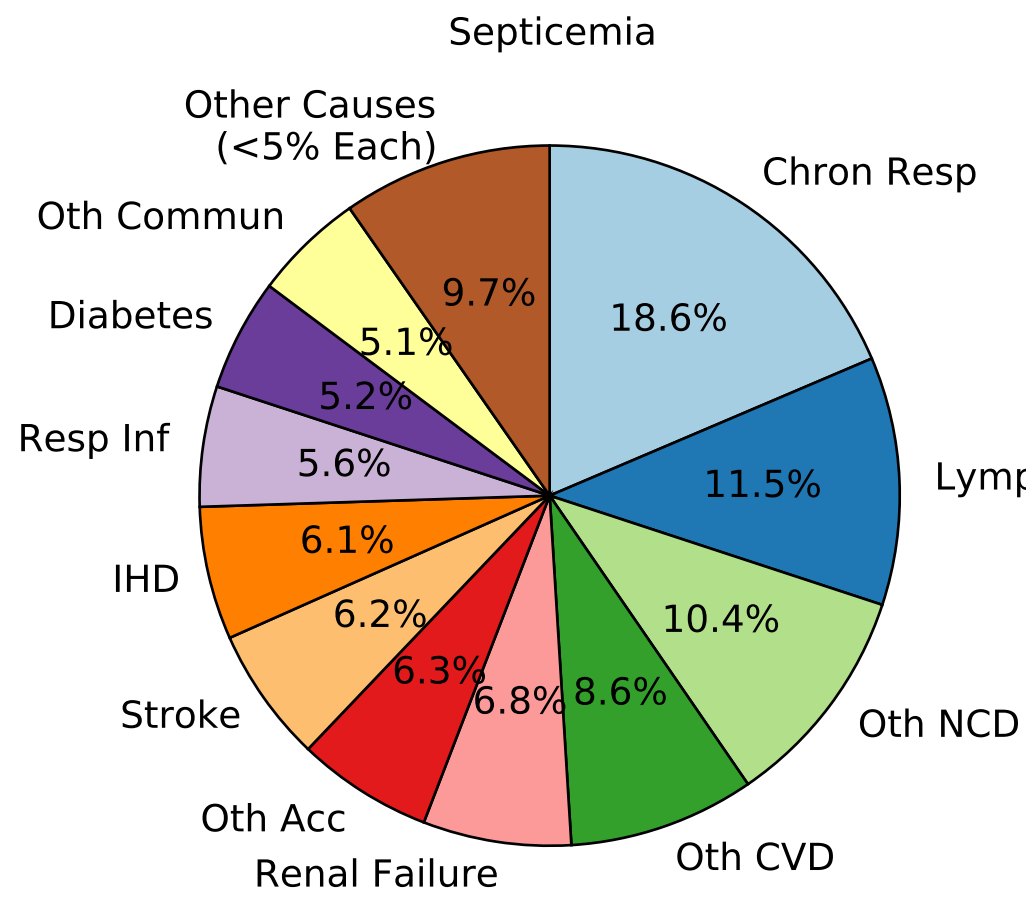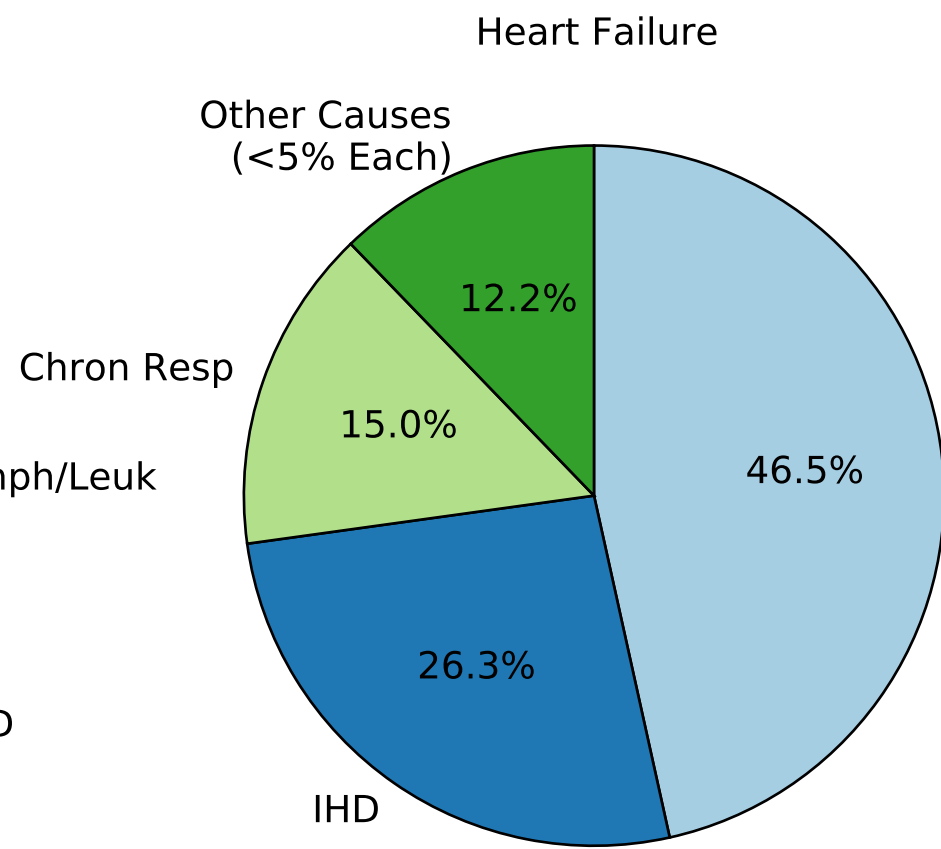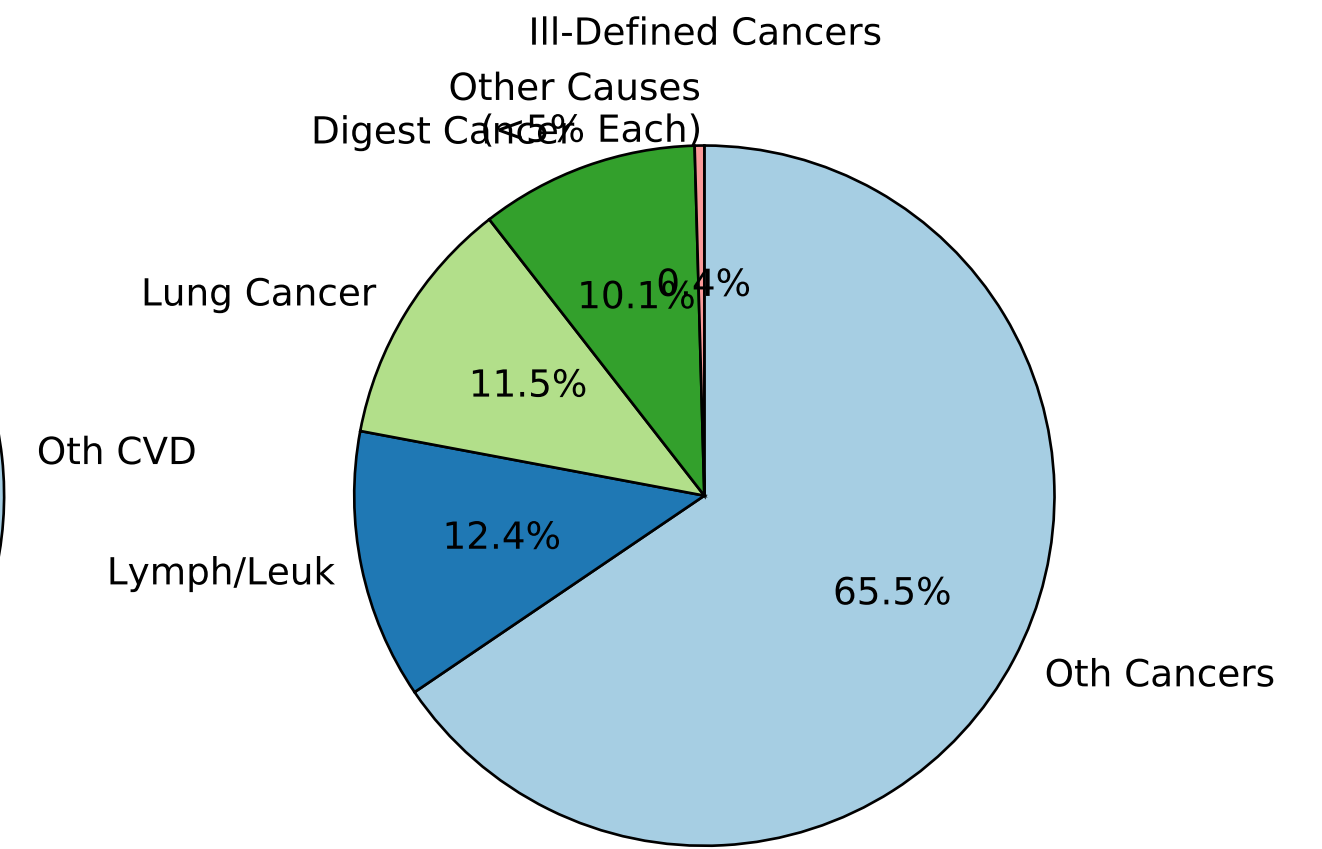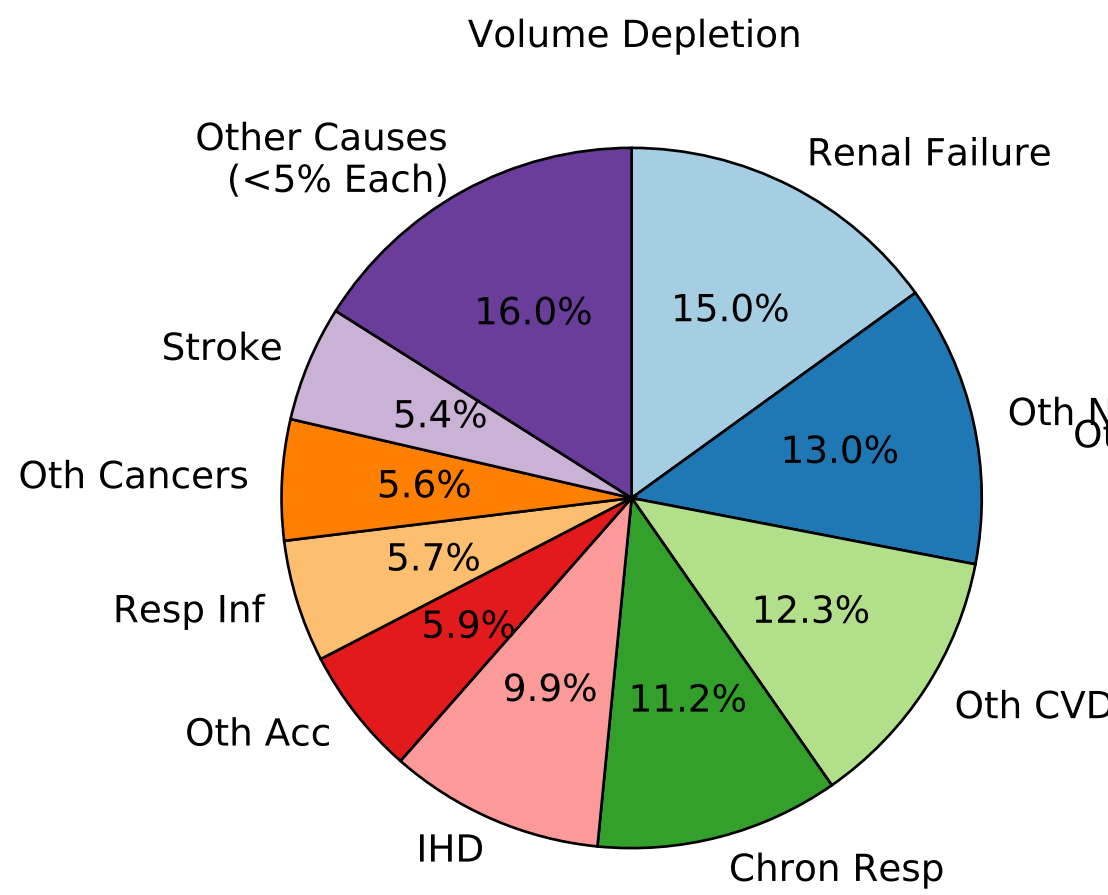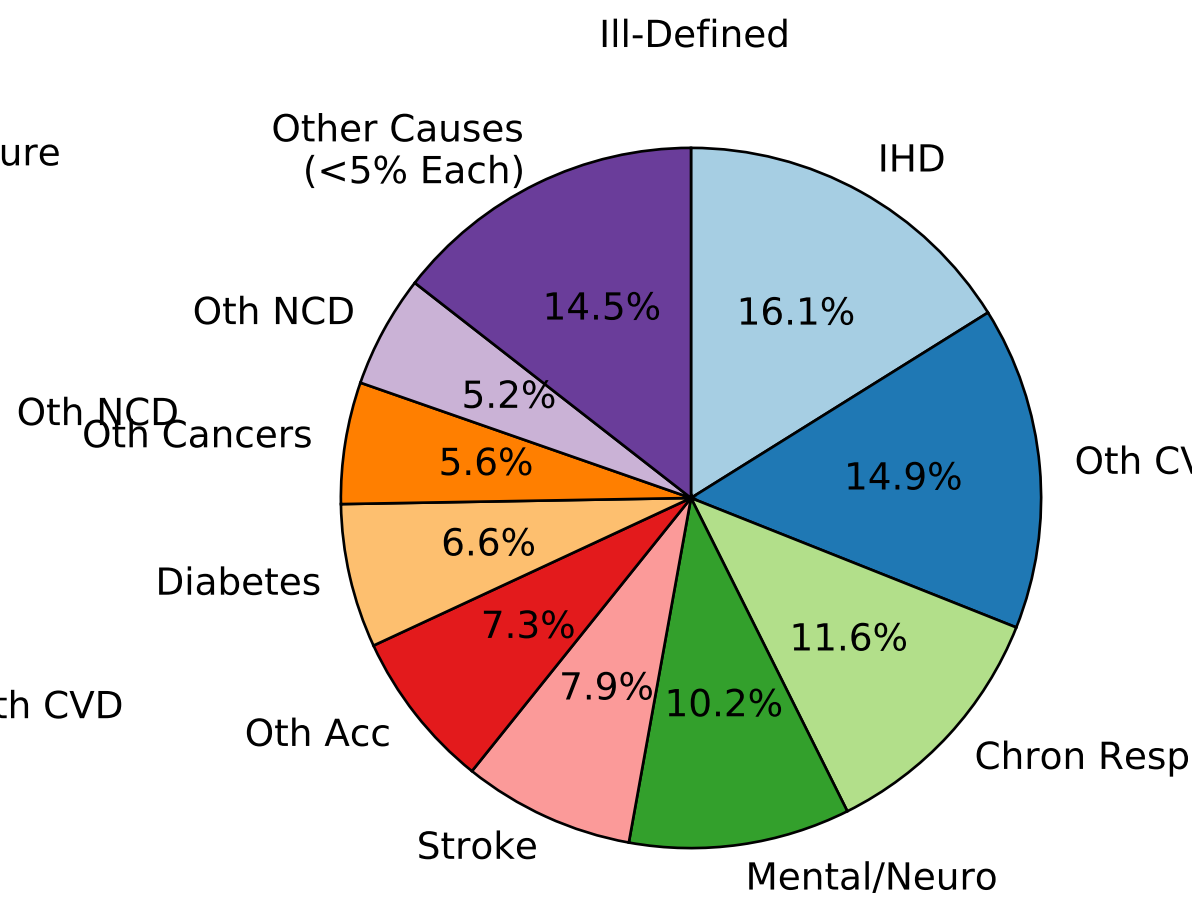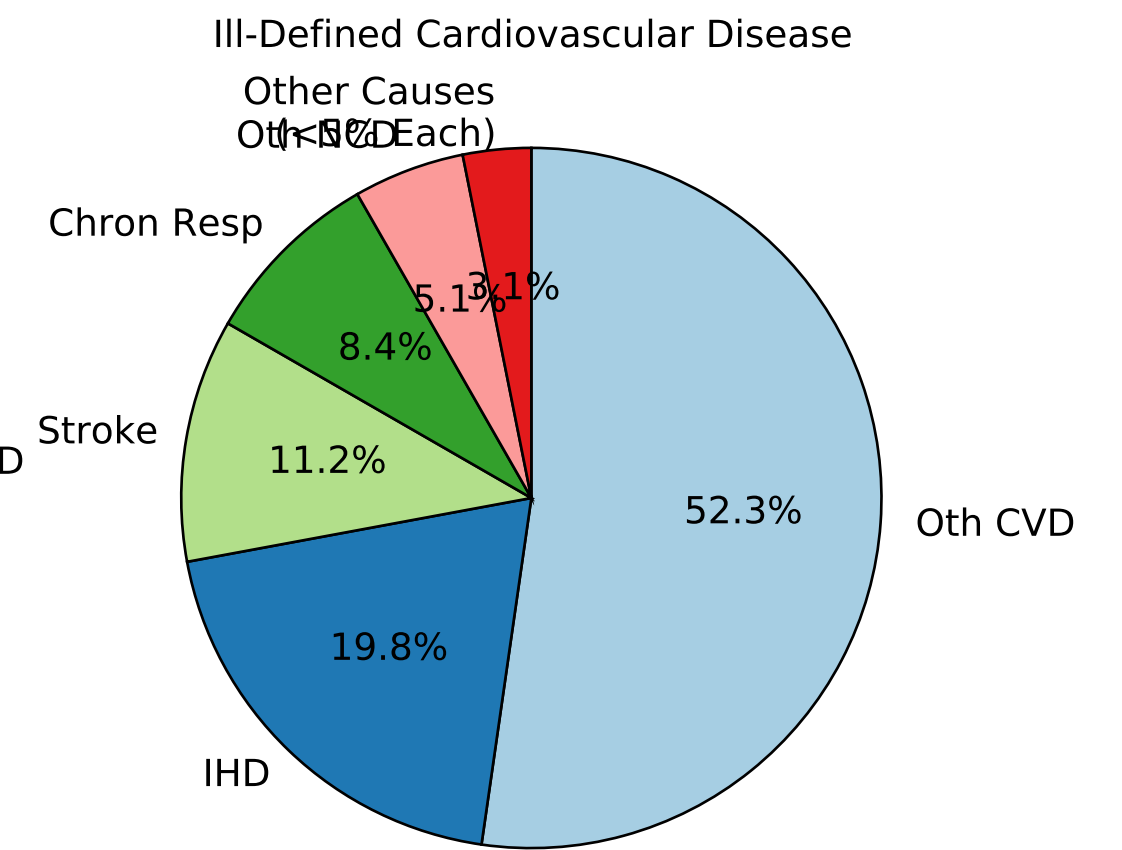

Ill-Defined Injury

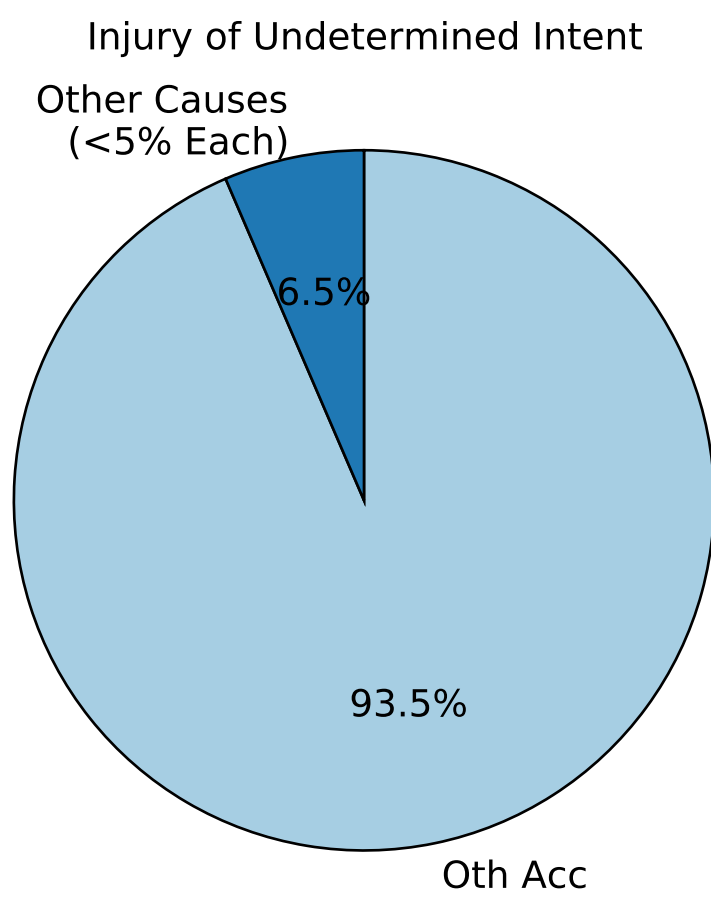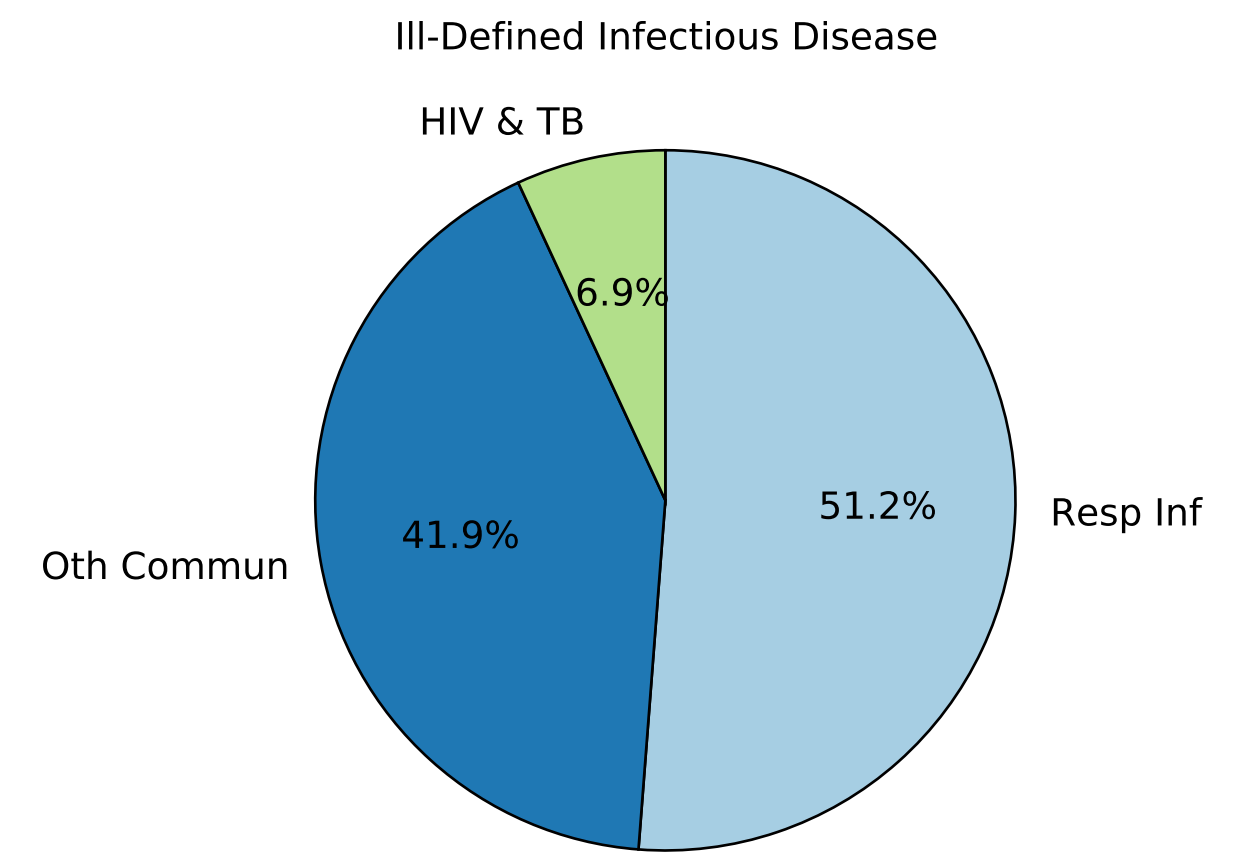

ICD 10  
Male, Age 80

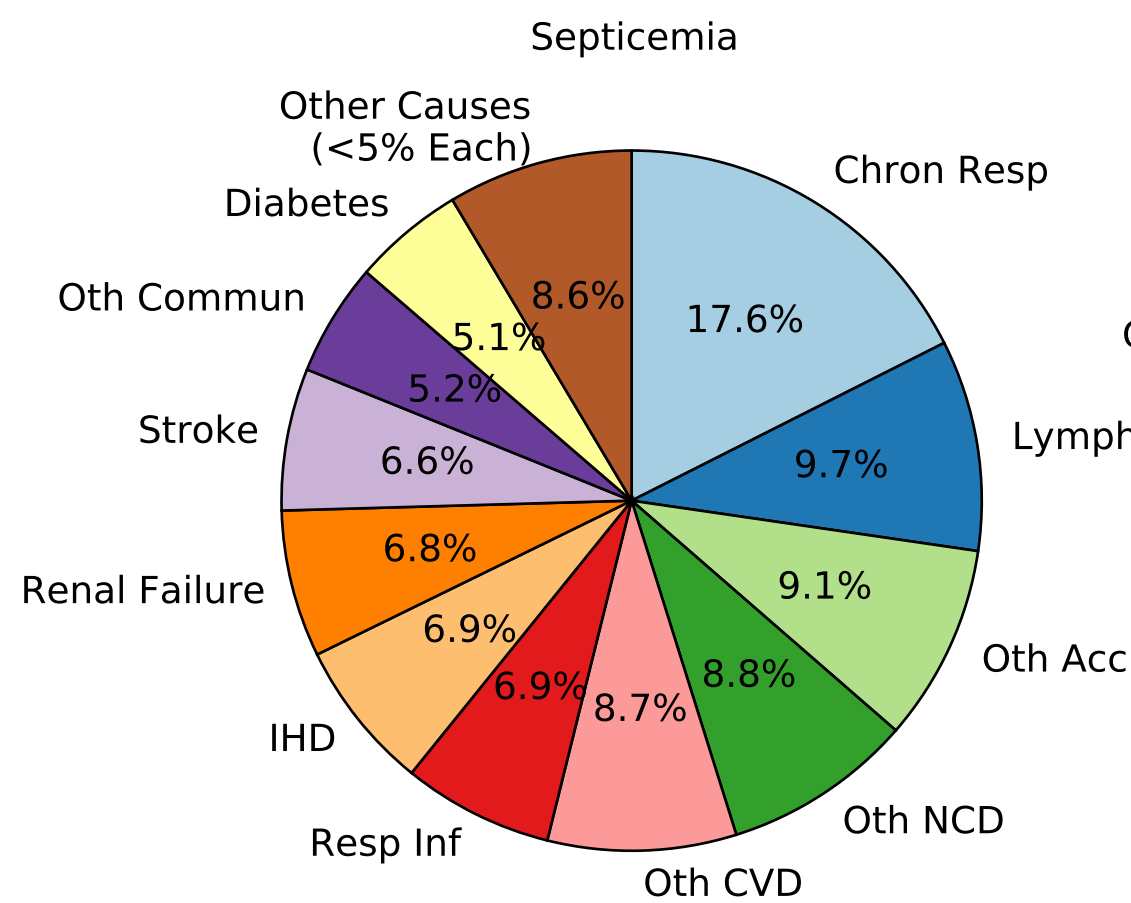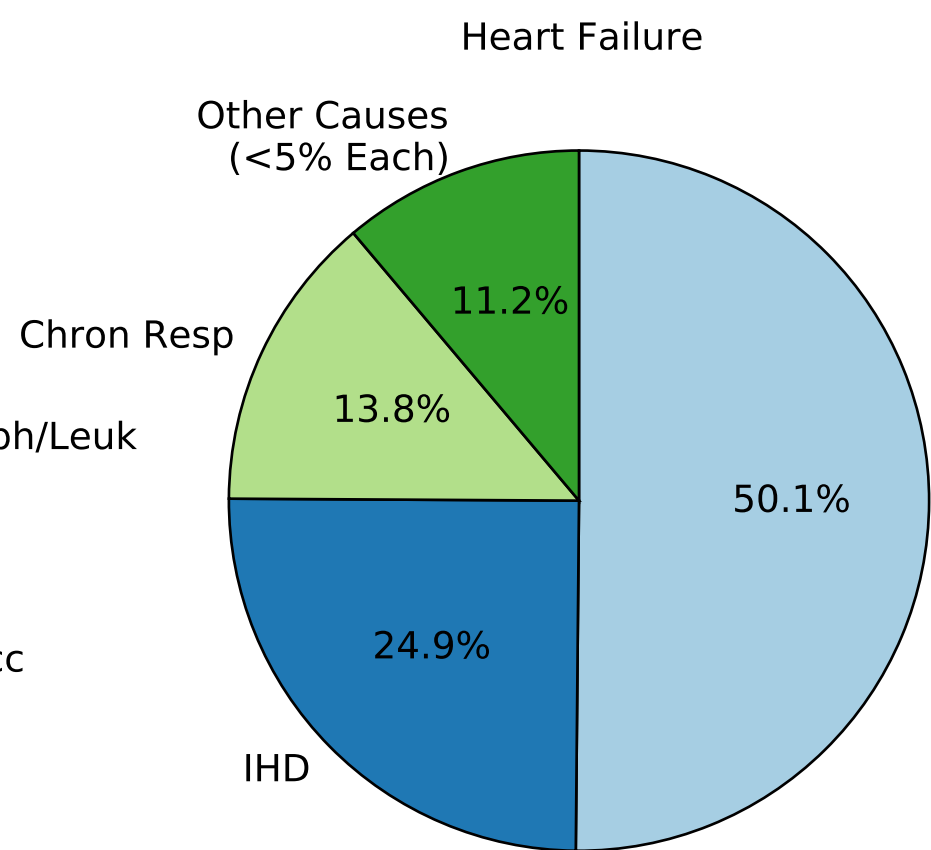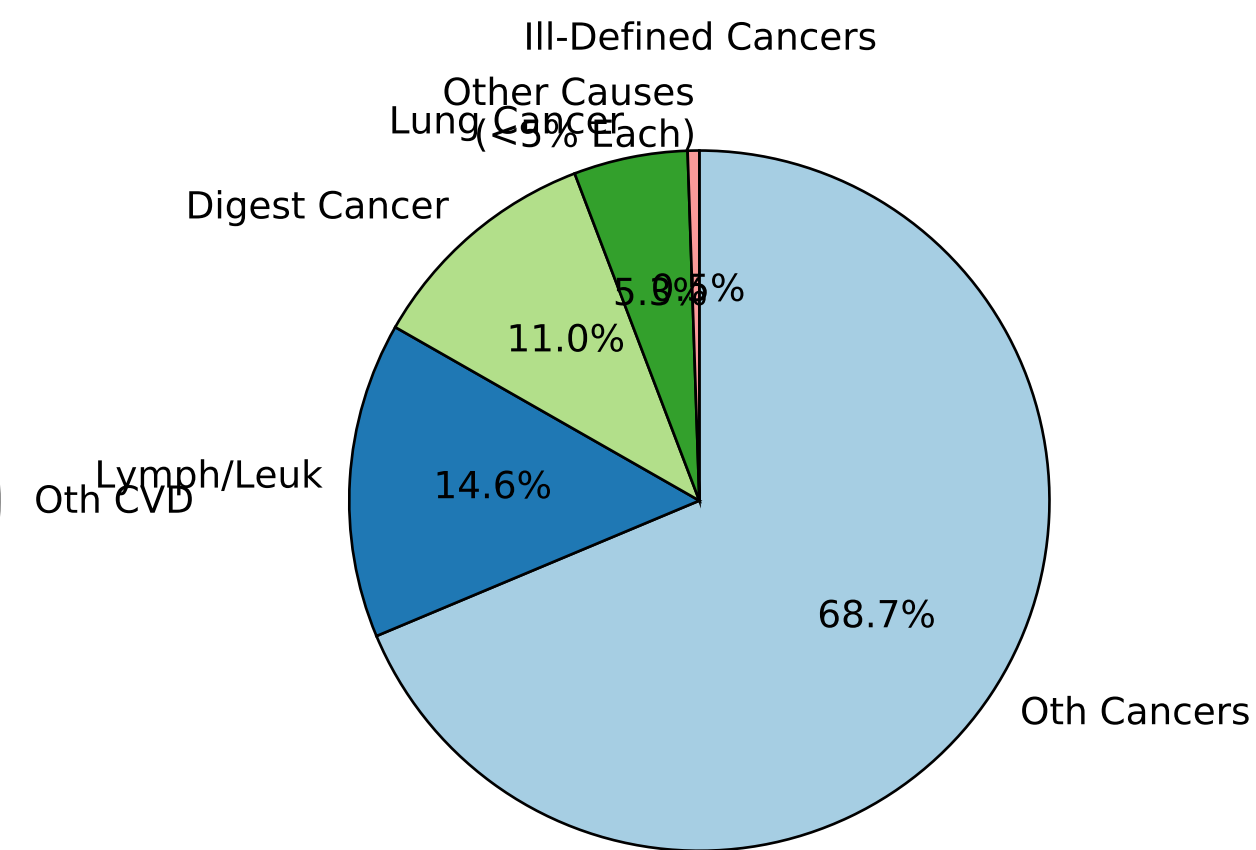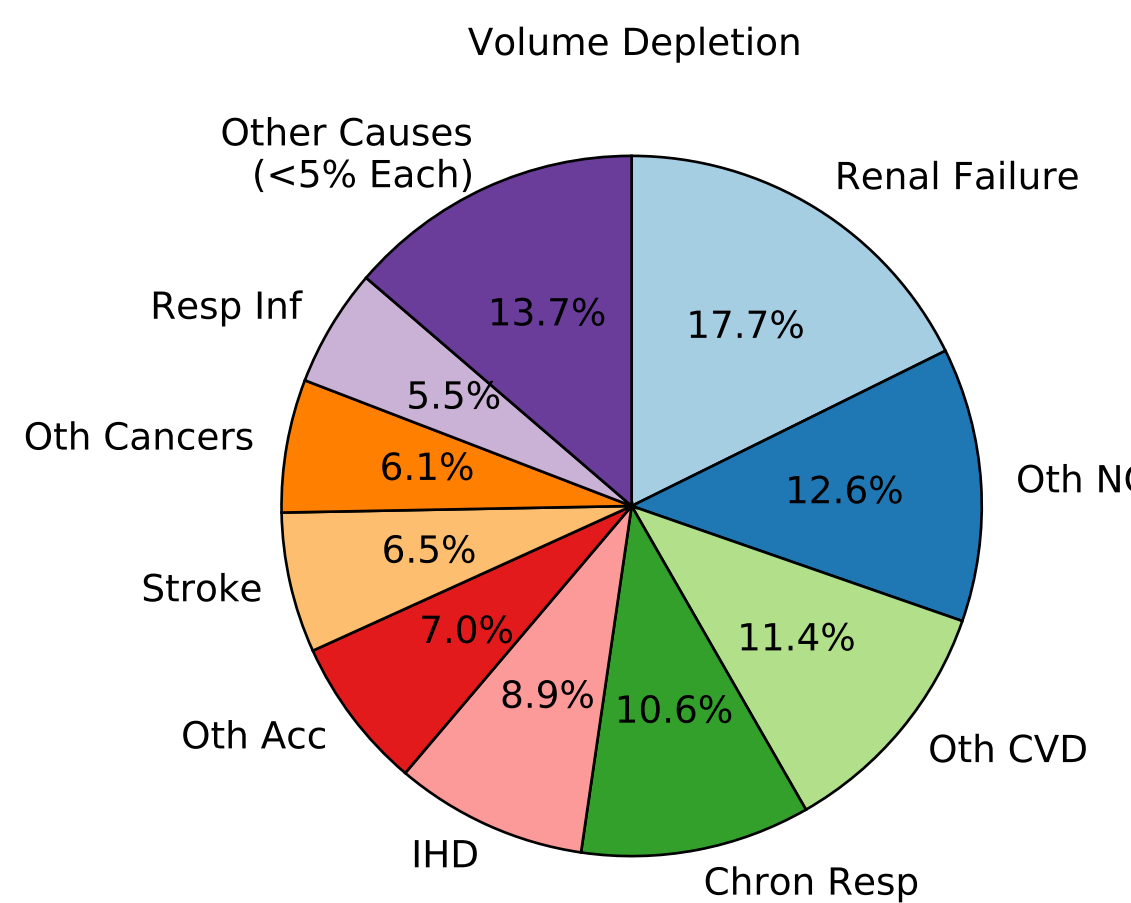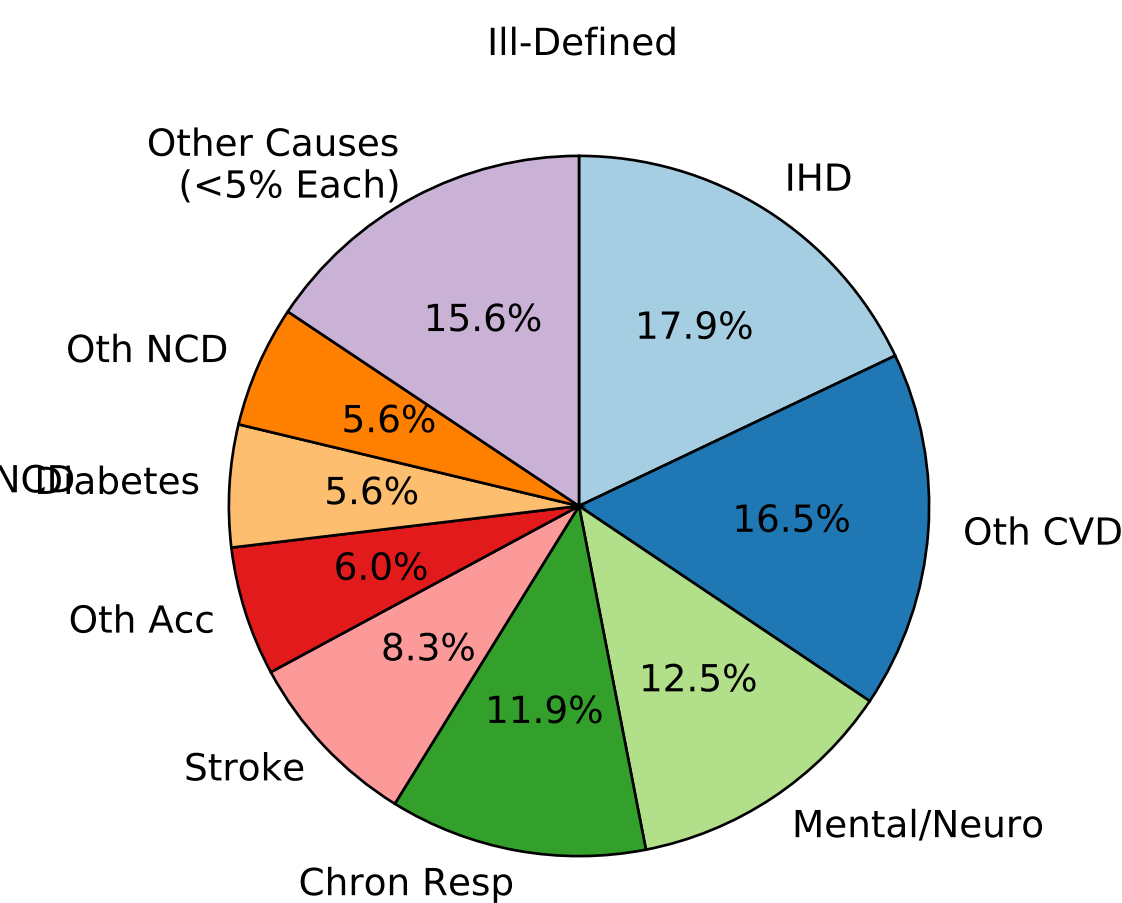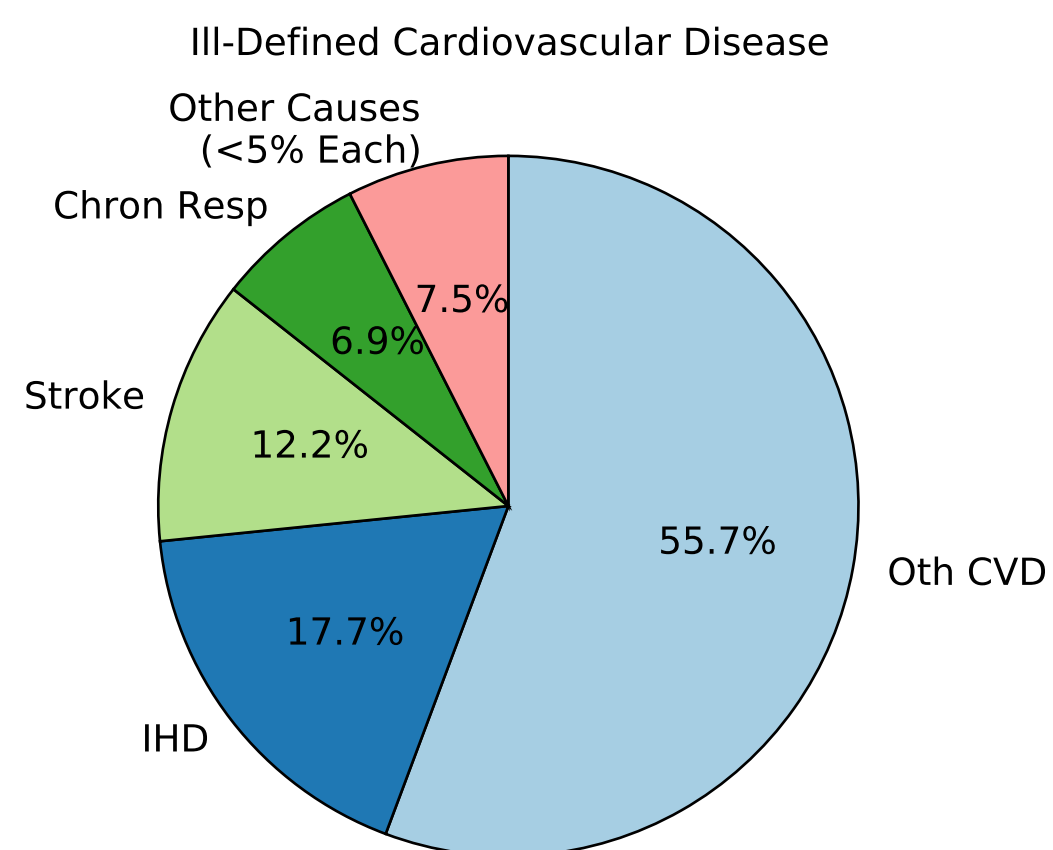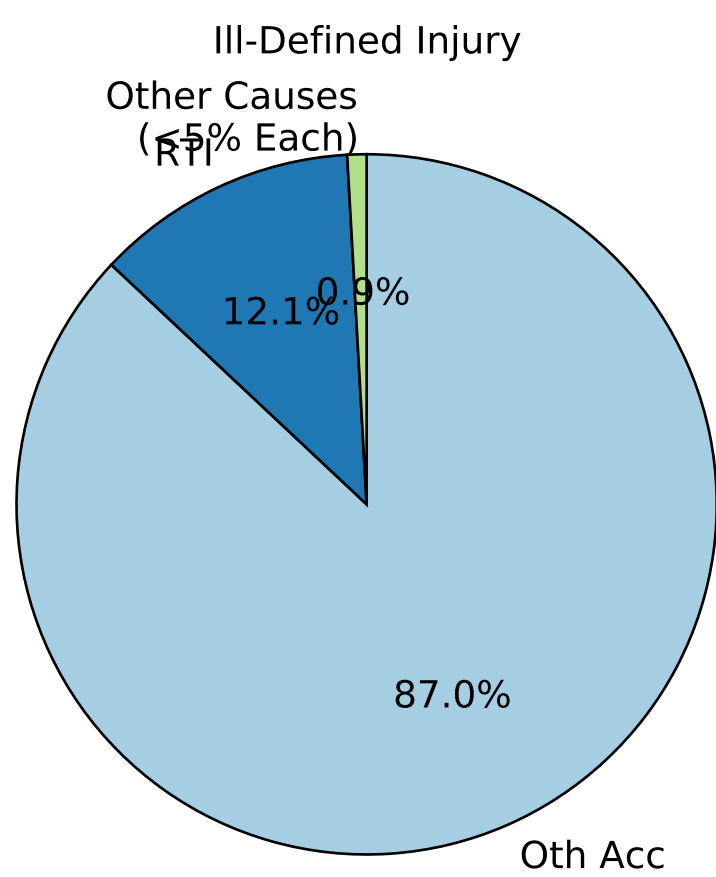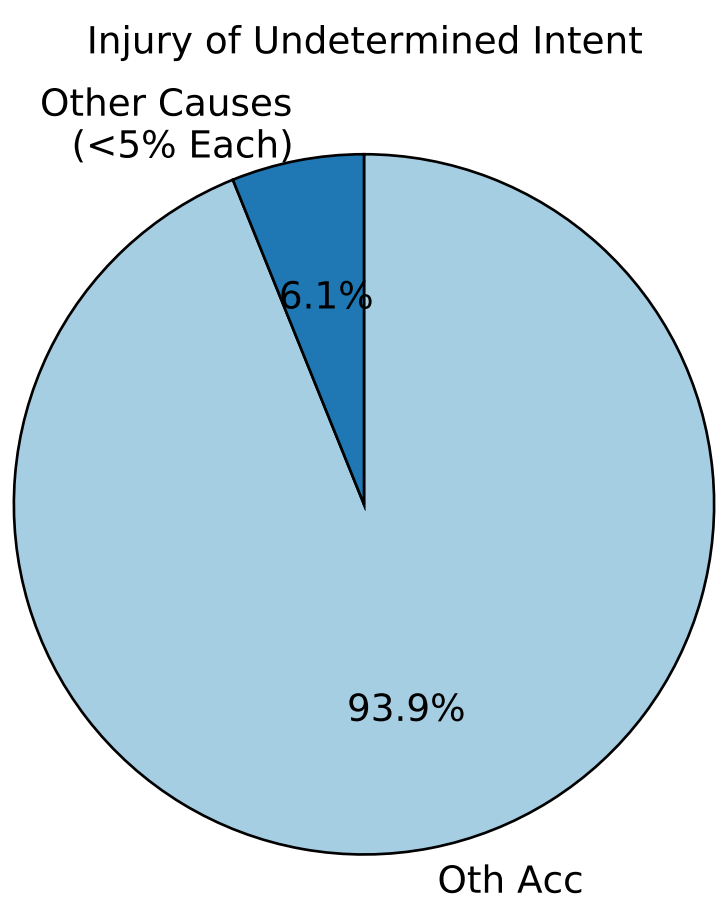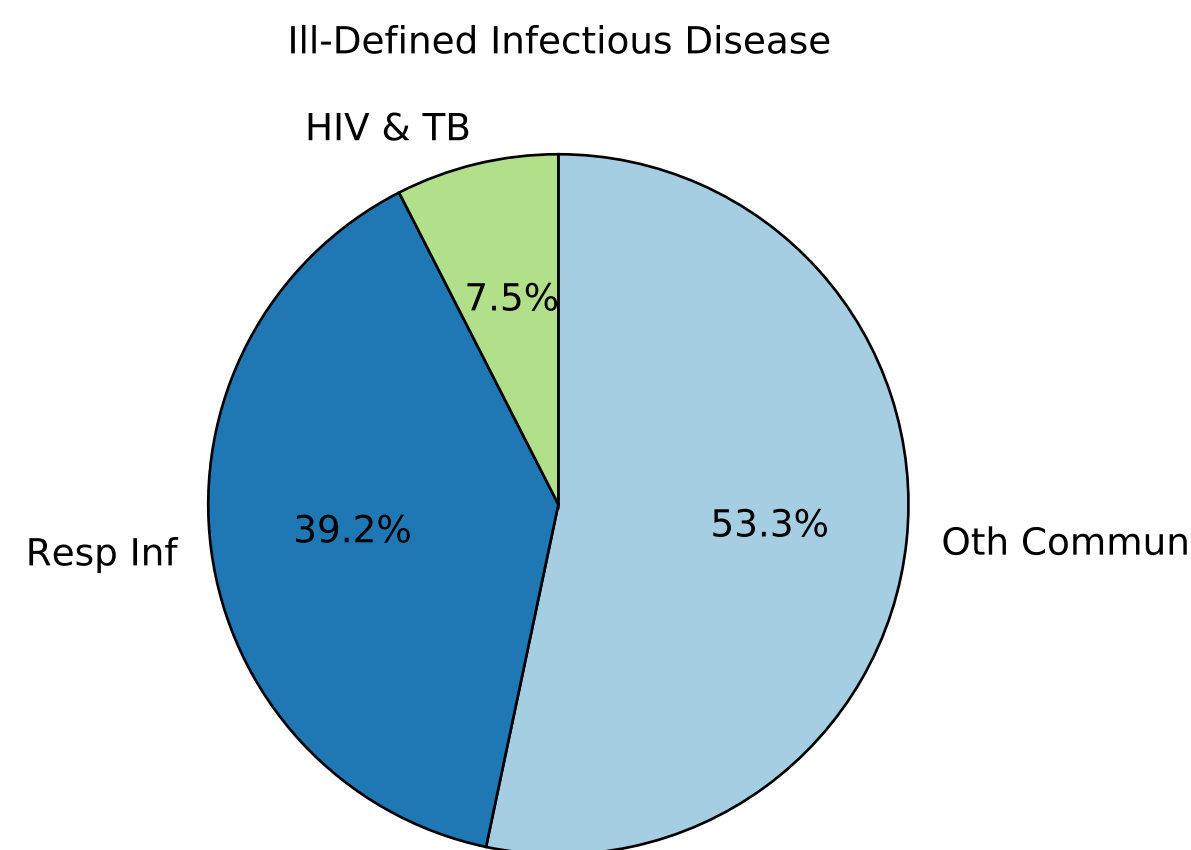

Supplement: 12963_2016_82_MOESM4_ESM.pdf [file 12963_2016_82_MOESM4_ESM.pdf]
